# Supplementary material for: A deep proteomics perspective on CRM1-mediated nuclear export and nucleocytoplasmic partitioning
Source: eLife. 2015 Dec 17;4:e11466. doi: 10.7554/eLife.11466 (PMC4764573; doi:10.7554/eLife.11466)
Supplement: Supplementary file 2. — DOI: http://dx.doi.org/10.7554/eLife.11466.015 [file elife-11466-supp2.xlsx]

## Sheet: Index
	Index for Xenopus laevis oocyte CRM1 affinity chromatography MS Data
									Category threshold for Xenopus oocyte CRM1 cargo analysis
	Main Table			MS data sheet with simplified columns					# of proteins in each category
													RanGTP stimulation	Enrichment from input	Molar fraction in "CRM1+RanGTP" (×10ˆ6)	Molar fraction in starting extract (x10ˆ6)	No of proteins	No of flagged proteins	CRM1 Exportome
									Categories of
	Extended Table			MS data sheet with full columns					CRM1-binders
									A	A1			≥500	≥4	≥50	---	407	22	958 (Note that flagged proteins are excluded)
	Additional Non-binders			Proteins that were identified in the spatial proteomics of Xenopus laevis oocytes, but not in the CRM1 affinity chromatograpy extract or eluates						A2			2-499	≥100	≥50	---	25	---
									B (not part of A)	B1		B1a	50-500	≥4	≥50	---	24	---
												B1b	≥500	2-4	≥50	---	34	2
	Translation Factors			Protein Kinases								B1c	≥500	≥4	10-50	---	63	1
										B2		B2a	10-499	20-100	≥50	---	6	1
												B2b	2-499	≥100	10-50	---	155	4
	Vesicle Coat Proteins			Protein Phosphatases					C/Low abundant				---	---	≥1	---	277	13
									(detected only in the “CRM1+RanGTP”-fraction, but not part of A or B)
									Ambiguous		Ambiguous Cargoes (not part of A, B or C)		≥ 50	≥ 3	---	---	201	11
	Cytoskeleton Proteins			Ubiquitin System							Ambiguous		Proteins that do not satisfy any of the criteria above			---	912	84
											Ambiguous Non-binder		---	< 0.01 & 0	---	<10	494	82
	Centrosomal Proteins			mTOR					Non-binder (NB)				---	< 0.01 & 0	---	≥10	722	111
									NPC and transport-related				Manually assigned			---	28	---
	Aminoacyl tRNA ligases			Glycolysis
	Cytoplasmic mRNA Biogenesis
	Table S2. Identification of Xenopus CRM1 cargoes from oocytes This Excel file is based on mass spectrometric protein quantifications from three samples, namely: (i) input extract used for affinity chromatography, (ii) sample "bound to CRM1 w/o Ran", and (iii) sample "bound to CRM1+RanGTP". For each identified unique protein, three parameters were then derived: RanGTP stimulation = iBAQ[CRM1+RanGT…

## Sheet: Main table
				Protein localization and concentrations			Binding to CRM1
Leading Protein ID	Xenopus UniProt Link	Human UniProt Link	Human Description	Nuc to Cyt concentration ratio (log10)	Cytosolic Concentration (nM)	Nuclear Concentration (nM)	RanGTP Stimulation	Enrichment from input	Molar Fraction in CRM1+RanGTP (×10^6)	Molar Fraction in Input (×10^6)	Category	Reported CRM1 interactions	Mw Contig [kDa]	MW Xenopus	MW human	Flags	Sorting	id
CL352Contig2	Q4KLT2_XENLA	PHAX_HUMAN	Phosphorylated adapter RNA export protein (RNA U small nuclear RNA export adapter protein)	1.55	11	390	8900	740	640	0.0250879	Cargo A		45.702	44.974	44.403		A1	4720
CL2539Contig1	CTU1_XENLA	CTU1_HUMAN	Cytoplasmic tRNA 2-thiolation protein 1 (EC 2.7.7.-) (ATP-binding domain-containing protein 3) (Cancer-associated gene protein) (Cytoplasmic tRNA adenylyltransferase 1)	-3	22	0	1000	740	350	0.27499	Cargo A		38.496	38.497	36.45		A1	3643
TC424610	Q6NUG8_XENLA	RWDD4_HUMAN	RWD domain-containing protein 4 (Protein FAM28A)	-1.28	40	2.1	4700	740	340	0.0250879	Cargo A		21.15	20.903	21.251		A1	10451
TC446167	WIBG_XENLA	WIBG_HUMAN	Partner of Y14 and mago (Protein wibg homolog)	-2.28	150	0.8	3800	740	270	0.0250879	Cargo A		22.553	22.553	22.656		A1	10635
CL3041Contig2	Q4KLU9_XENLA	SEP10_HUMAN	Septin-10	-3	24	0	3700	740	270	0.0250879	Cargo A		52.615	52.616	52.593		A1	4255
CL4764Contig1	Q9PTK7_XENLA	AP180_HUMAN	Clathrin coat assembly protein AP180 (91 kDa synaptosomal-associated protein) (Clathrin coat-associated protein AP180) (Phosphoprotein F1-20)	-3	30	0	3100	740	220	0.0250879	Cargo A		92.978	92.979	92.502		A1	5905
CL328Contig4	PDLI7_XENLA	PDLI7_HUMAN	PDZ and LIM domain protein 7 (LIM mineralization protein) (LMP) (Protein enigma)	0.32	5.3	11	2500	740	180	0.123103	Cargo A		46.335	46.427	49.845		A1	4468
CL1874Contig5	FRMD8_XENLA	FRMD8_HUMAN	FERM domain-containing protein 8	-3	2.1	0	2300	740	160	0.0250879	Cargo A		52.363	51.584	51.218		A1	2420
CL12285Contig1	DAL1B_XENLA	DAPL1_HUMAN	Death-associated protein-like 1 (Early epithelial differentiation-associated protein)	-2.13	6300	47	2200	740	160	0.0250879	Cargo A		12.526	196.751	11.88		A1	1010
CL934Contig3	TISDA_XENLA	TISB_HUMAN	Zinc finger protein 36, C3H1 type-like 1 (Butyrate response factor 1) (EGF-response factor 1) (ERF-1) (Protein TIS11B)	-3	1.1	0	2000	740	140	0.0250879	Cargo A		40.078	40.078	36.314		A1	8561
CL1331Contig1	B7ZQY0_XENLA			-1.01417	25	2.5	1900	740	130	0.0250879	Cargo A		88.29	88.291			A1	1324
CL1911Contig2	Q4KLR5_XENLA	IKBE_HUMAN	NF-kappa-B inhibitor epsilon (NF-kappa-BIE) (I-kappa-B-epsilon) (IkB-E) (IkB-epsilon) (IkappaBepsilon)	-3	3.9	0	1700	740	120	0.0250879	Cargo A	NESdbO	37.859	37.873	52.864		A1	2495
CL3480Contig2	SEP8A_XENLA	SEPT8_HUMAN	Septin-8	-3	3.6	0	1700	740	120	0.0250879	Cargo A		49.738	49.738	55.756		A1	4667
CL37706Contig1	Q6IR51_XENLA	HIF1N_HUMAN	Hypoxia-inducible factor 1-alpha inhibitor (EC 1.14.11.30) (EC 1.14.11.n4) (Factor inhibiting HIF-1) (FIH-1) (Hypoxia-inducible factor asparagine hydroxylase)	-3	45	0	1600	740	110	0.0250879	Cargo A		27.208	40.876	40.285		A1	4990
zeinaSSns_comp385282_c0_seq3	B1H1Q0_XENLA	CD37L_HUMAN	Hsp90 co-chaperone Cdc37-like 1 (Hsp90-associating relative of Cdc37)	-1.73	13	0.3	1500	740	110	0.0250879	Cargo A	BioGrid	23.257	32.041	38.835		A1	11011
CL2847Contig2	Q7ZXH4_XENLA	SRP54_HUMAN	Signal recognition particle 54 kDa protein (SRP54)	-3	2.3	0	610	740	110	0.0250879	Cargo A		55.749	55.559	55.705		A1	4044
CL7402Contig1	Q5U250_XENLA	SIR2_HUMAN	NAD-dependent protein deacetylase sirtuin-2 (EC 3.5.1.-) (Regulatory protein SIR2 homolog 2) (SIR2-like protein 2)	-3	120	0	1400	740	100	0.0250879	Cargo A	NESdbO, BioGrid	45.694	45.566	43.182		A1	7642
CL8047Contig2	A1L1D0_XENTR	SEBP2_HUMAN	Selenocysteine insertion sequence-binding protein 2 (SECIS-binding protein 2)	-3	3.5	0	1400	740	100	0.0250879	Cargo A	NESdbO	61.738		95.462		A1	7974
CL1Contig625	SMG9_XENLA	SMG9_HUMAN	Protein SMG9 (Protein smg-9 homolog)	-3	21	0	1400	740	99	0.0250879	Cargo A		56.599	56.599	57.651		A1	2847
CL5876Contig1	LIMD1_XENLA	LIMD1_HUMAN	LIM domain-containing protein 1	-3	1	0	1400	740	99	0.0250879	Cargo A		68.332	68.332	72.19		A1	6743
CL7237Contig1	Q6NRN5_XENLA	TF65_HUMAN	Transcription factor p65 (Nuclear factor NF-kappa-B p65 subunit) (Nuclear factor of kappa light polypeptide gene enhancer in B-cells 3)	-2.48	7.4	0	1400	740	99	0.0250879	Cargo A	NESdbO	58.897	58.787	60.219		A1	7568
CL4874Contig2	NTKL_XENLA	NTKL_HUMAN	N-terminal kinase-like protein (Coated vesicle-associated kinase of 90 kDa) (SCY1-like protein 1) (Telomerase regulation-associated protein) (Telomerase transcriptional element-interacting factor) (Teratoma-associated tyrosine kinase)	-3	16	0	1400	740	98	0.0250879	Cargo A		91.301	91.303	89.631		A1	5995
TC418765	Q52KW6_XENLA			-3	1.7	0	1300	740	96	0.0250879	Cargo A		25.115	25.115			A1	10420
CL9Contig30	FXR1B_XENLA	FXR1_HUMAN	Fragile X mental retardation syndrome-related protein 1 (hFXR1p)	-3	35	0	1300	740	94	0.0250879	Cargo A		76.212	76.212	69.721		A1	8837
CL10346Contig1	F6RX86_XENTR	AZI2_HUMAN	5-azacytidine-induced protein 2 (NF-kappa-B-activating kinase-associated protein 1) (Nak-associated protein 1) (TILP)	-3	12	0	1300	740	93	0.0250879	Cargo A		44.25	7.786	44.935		A1	321
CL13417Contig1	B2RZ03_XENTR	CDCA7_HUMAN	Cell division cycle-associated protein 7 (Protein JPO1)	-0.95	13	1.5	1300	740	92	0.0250879	Cargo A		37.778	49.748	42.573		A1	1350
CL9700Contig1	TRADD_XENLA	TRADD_HUMAN	Tumor necrosis factor receptor type 1-associated DEATH domain protein (TNFR1-associated DEATH domain protein) (TNFRSF1A-associated via death domain)	-1.29	18	0.9	1200	740	88	0.0250879	Cargo A		36.551	34.377	34.247		A1	8701
CL5902Contig3	F6UNF0_XENTR	TRI25_HUMAN	E3 ubiquitin/ISG15 ligase TRIM25 (EC 6.3.2.19) (EC 6.3.2.n3) (Estrogen-responsive finger protein) (RING finger protein 147) (Tripartite motif-containing protein 25) (Ubiquitin/ISG15-conjugating enzyme TRIM25) (Zinc finger protein 147)	-3	7.1	0	1200	740	86	0.0250879	Cargo A		69.576	63.448	70.973		A1	6772
CL4771Contig1	B1H387_XENTR			-3	6.9	0	1200	740	83	0.0250879	Cargo A		63.9				A1	5915
CL5275Contig3	Q5M9B4_XENLA	PQBP1_HUMAN	Polyglutamine-binding protein 1 (PQBP-1) (38 kDa nuclear protein containing a WW domain) (Npw38) (Polyglutamine tract-binding protein 1)	1.97	3.8	350	1200	740	83	0.0250879	Cargo A		22.124	22.125	30.472		A1	6318
CL15627Contig1	K9J7L5_XENTR	FBXL4_HUMAN	F-box/LRR-repeat protein 4 (F-box and leucine-rich repeat protein 4) (F-box protein FBL4/FBL5)				1100	740	82	0.0250879	Cargo A		70.171	48.357	70.097		A1	1889
CL73Contig16	SLAIL_XENLA	SLAI1_HUMAN	SLAIN motif-containing protein 1	-3	4.9	0	1100	740	77	0.0250879	Cargo A		61.985	61.986	60.595		A1	7640
CL2061Contig2	Q32N38_XENLA	FA53A_HUMAN	Protein FAM53A (Dorsal neural-tube nuclear protein)	0	1.2	1.2	1000	740	72	0.0250879	Cargo A		45.464	45.823	42.585		A1	2982
CL4203Contig1	Q3KQ17_XENLA	MKRN2_HUMAN	Probable E3 ubiquitin-protein ligase makorin-2 (EC 6.3.2.-) (RING finger protein 62)	-3	5.8	0	1000	740	72	0.0250879	Cargo A		45.94	45.921	46.94		A1	5455
CL6135Contig2	UBP16_XENLA	UBP16_HUMAN	Ubiquitin carboxyl-terminal hydrolase 16 (EC 3.4.19.12) (Deubiquitinating enzyme 16) (Ubiquitin thioesterase 16) (Ubiquitin-processing protease UBP-M) (Ubiquitin-specific-processing protease 16)	-3	18	0	930	740	67	0.0250879	Cargo A	BioGrid	97.522	101.293	93.57		A1	6919
CL2889Contig2	Q6INR2_XENLA	P5CR2_HUMAN	Pyrroline-5-carboxylate reductase 2 (P5C reductase 2) (P5CR 2) (EC 1.5.1.2)				860	740	61	0.0250879	Cargo A		33.732	33.733	33.637		A1	4080
CL2495Contig2	GKP1A_XENLA	GKAP1_HUMAN	G kinase-anchoring protein 1 (cGMP-dependent protein kinase-anchoring protein of 42 kDa)	-3	50	0	850	740	61	0.0250879	Cargo A		41.044	41.045	42.078		A1	3576
CL9463Contig1	Q6PGS1_XENLA	SQSTM_HUMAN	Sequestosome-1 (EBI3-associated protein of 60 kDa) (EBIAP) (p60) (Phosphotyrosine-independent ligand for the Lck SH2 domain of 62 kDa) (Ubiquitin-binding protein p62)				790	740	57	0.0250879	Cargo A		50.068	50.069	47.687		A1	8606
CL7632Contig1	Q3KPW8_XENLA	LSM11_HUMAN	U7 snRNA-associated Sm-like protein LSm11	-0.11	9.7	7.5	780	740	56	0.0250879	Cargo A		36.105	32.836	39.5		A1	7757
CL9Contig14	F7ET55_XENTR	SAS10_HUMAN	Something about silencing protein 10 (Charged amino acid-rich leucine zipper 1) (CRL1) (Disrupter of silencing SAS10) (UTP3 homolog)	3	0.1	260	760	740	54	0.0250879	Cargo A		54.988		54.558		A1	8831
CL1237Contig2	CCNB2_XENLA	CCNB2_HUMAN	G2/mitotic-specific cyclin-B2	-1.68	8.4	0.2	750	740	54	0.0250879	Cargo A		43.624	53.666	45.282		A1	1041
CL1067Contig4	Q6NTP0_XENLA	IMP4_HUMAN	U3 small nucleolar ribonucleoprotein protein IMP4 (U3 snoRNP protein IMP4) (Brix domain-containing protein 4)	3	0	260	740	740	53	0.0250879	Cargo A		34.595	34.692	33.757		A1	437
TC420569	Q66L13_XENLA	DNJC8_HUMAN	DnaJ homolog subfamily C member 8 (Splicing protein spf31)	1.85	5.7	400	730	740	53	0.0250879	Cargo A		30.25	29.465	29.842		A1	10430
CL3910Contig1	B1H1P4_XENLA	SPB1_HUMAN	pre-rRNA processing protein FTSJ3 (EC 2.1.1.-) (2'-O-ribose RNA methyltransferase SPB1 homolog) (Protein ftsJ homolog 3) (Putative rRNA methyltransferase 3)	2.2	1.6	250	720	740	51	0.0250879	Cargo A		96.866	96.91	96.558		A1	5131
CL552Contig2	AURAA_XENLA	AURKA_HUMAN	Aurora kinase A (EC 2.7.11.1) (Aurora 2) (Aurora/IPL1-related kinase 1) (ARK-1) (Aurora-related kinase 1) (hARK1) (Breast tumor-amplified kinase) (Serine/threonine-protein kinase 15) (Serine/threonine-protein kinase 6) (Serine/threonine-protein kinase aurora-A)	-0.19	10	6.8	690	740	50	0.0250879	Cargo A		46.371	46.372	45.809		A1	6507
CL4865Contig2	Q6PAW8_XENLA	LPIN2_HUMAN	Phosphatidate phosphatase LPIN2 (EC 3.1.3.4) (Lipin-2)	-3	3.6	0	1900	600	130	0.221328	Cargo A		89.462	99.572	99.399		A1	5990
CL4786Contig1	Q0V9K4_XENTR	TBC17_HUMAN	TBC1 domain family member 17	-3	5.5	0	870	570	62	0.11024	Cargo A		77.04	83.331	72.728		A1	5929
CL8579Contig1	B3DLL9_XENLA	SHQ1_HUMAN	Protein SHQ1 homolog	0.5	3.5	11	830	510	59	0.116329	Cargo A		67.802	67.773	65.125		A1	8210
CL851Contig2	F6ZST8_XENTR	MTMR6_HUMAN	Myotubularin-related protein 6 (EC 3.1.3.-)	-3	7.2	0	1200	450	85	0.187019	Cargo A		77.912	69.73	71.968		A1	8175
CL2217Contig1	Q5EAU7_XENLA	TDRKH_HUMAN	Tudor and KH domain-containing protein (Tudor domain-containing protein 2)	0.39	0.1	0.3	6500	430	460	1.06907	Cargo A		72.416	79.452	62.046		A1	3216
CL11646Contig1	Q6GQZ5_XENLA	TRIP4_HUMAN	Activating signal cointegrator 1 (ASC-1) (Thyroid receptor-interacting protein 4) (TR-interacting protein 4) (TRIP-4)	-0.64	11	2.6	1100	400	79	0.198385	Cargo A		64.73	79.572	66.146		A1	785
CL2487Contig3	STK11_XENLA	STK11_HUMAN	Serine/threonine-protein kinase STK11 (EC 2.7.11.1) (Liver kinase B1) (LKB1) (hLKB1) (Renal carcinoma antigen NY-REN-19)	-3	12	0	4300	300	310	1.02014	Cargo A		48.955	49.073	48.636		A1	3557
CL12325Contig1	F7C1W6_XENTR	PDD2L_HUMAN	Programmed cell death protein 2-like	-3	8.1	0	3300	300	240	0.801432	Cargo A		39.422	50.995	39.417		A1	1028
dsrrswapns_comp193425_c0_seq2	LTV1_XENLA	LTV1_HUMAN	Protein LTV1 homolog	-1.53	42	1.2	3100	300	230	0.760766	Cargo A		54.021	54.022	54.855		A1	9049
BJ091434	Q7SZA5_XENLA	RL29_HUMAN	60S ribosomal protein L29 (Cell surface heparin-binding protein HIP)	-1.52	2300	69	2000	290	140	0.499601	Cargo A		8.5539	81.375	17.752		A1	95
CL8010Contig2	Q3KQ55_XENLA	UEVLD_HUMAN	Ubiquitin-conjugating enzyme E2 variant 3 (UEV-3) (EV and lactate/malate dehydrogenase domain-containing protein)	-1.99	30	0.3	960	260	69	0.265968	Cargo A		52.324	47.519	52.264		A1	7958
CL4987Contig1	CTU2A_XENLA	CTU2_HUMAN	Cytoplasmic tRNA 2-thiolation protein 2	-3	30	0	1200	250	350	1.3869	Cargo A		57.25	57.231	56.107		A1	6080
CL25909Contig1	Q28DB2_XENTR	CPSF4_HUMAN	Cleavage and polyadenylation specificity factor subunit 4 (Cleavage and polyadenylation specificity factor 30 kDa subunit) (CPSF 30 kDa subunit) (NS1 effector domain-binding protein 1) (Neb-1) (No arches homolog)	0.58	5.9	23	1600	250	110	0.45334	Cargo A		30.911	30.492	30.255		A1	3728
CL6056Contig1	A9UMN3_XENLA	RN216_HUMAN	E3 ubiquitin-protein ligase RNF216 (EC 6.3.2.-) (RING finger protein 216) (Triad domain-containing protein 3) (Ubiquitin-conjugating enzyme 7-interacting protein 1) (Zinc finger protein inhibiting NF-kappa-B)	3	0	100	2400	240	170	0.715843	Cargo A		98.361	98.362	99.406		A1	6877
dsrrswapns_comp211917_c0_seq26	F7DS87_XENTR	RPAP2_HUMAN	Putative RNA polymerase II subunit B1 CTD phosphatase RPAP2 (EC 3.1.3.16) (RNA polymerase II-associated protein 2)	-3	5	0	2100	240	150	0.629975	Cargo A		69.149		69.509		A1	2877
CL6505Contig2	Q6GPT5_XENLA	BUB1B_HUMAN	Mitotic checkpoint serine/threonine-protein kinase BUB1 beta (EC 2.7.11.1) (MAD3/BUB1-related protein kinase) (hBUBR1) (Mitotic checkpoint kinase MAD3L) (Protein SSK1)	-1.83	14	0.2	780	230	56	0.24494	Cargo A		113.36	119.128	119.545		A1	7153
CL1100Contig4	Q7ZXU2_XENLA	GRWD1_HUMAN	Glutamate-rich WD repeat-containing protein 1	0.72	45	230	14000	210	1000	4.71464	Cargo A		51.568	34.236	49.419		A1	555
CL741Contig5	Q63ZU4_XENLA	EPN4_HUMAN	Clathrin interactor 1 (Clathrin-interacting protein localized in the trans-Golgi region) (Clint) (Enthoprotin) (Epsin-4) (Epsin-related protein) (EpsinR)	-2.12	59	0.4	1300	200	92	0.454872	Cargo A		68.095	68.067	68.259		A1	7652
CL1319Contig3	Q7T0B5_XENLA	TFCP2_HUMAN	Alpha-globin transcription factor CP2 (SAA3 enhancer factor) (Transcription factor LSF)	-3	10	0	910	200	65	0.319198	Cargo A		57.611	57.588	57.256		A1	1274
CL11124Contig1	Q6P4X9_XENTR	TBC15_HUMAN	TBC1 domain family member 15 (GTPase-activating protein RAB7) (GAP for RAB7) (Rab7-GAP)	-3	16	0	2000	190	150	0.748768	Cargo A		76.897	147.757	79.491		A1	593
CL7214Contig2	Q6GNJ0_XENLA	H1BP3_HUMAN	HCLS1-binding protein 3 (HS1-binding protein 3) (HSP1BP-3)	-3	14	0	4000	180	280	1.60087	Cargo A		45.431	43.92	42.78		A1	7559
CL5551Contig2	SC23A_XENTR	SC23A_HUMAN	Protein transport protein Sec23A (SEC23-related protein A)	-3	42	0	580	180	130	0.739668	Cargo A		85.965	83.201	86.161		A1	6529
CL6854Contig1	Q4V857_XENLA	AP1M1_HUMAN	AP-1 complex subunit mu-1 (AP-mu chain family member mu1A) (Adaptor protein complex AP-1 subunit mu-1) (Adaptor-related protein complex 1 subunit mu-1) (Clathrin assembly protein complex 1 mu-1 medium chain 1) (Clathrin coat assembly protein AP47) (Clathrin coat-associated protein AP47) (Golgi adaptor HA1/AP1 adaptin mu-1 subunit) (Mu-adaptin 1) (Mu1A-adaptin)	-3	260	0	3200	170	230	1.32535	Cargo A		48.526	48.527	48.587		A1	7353
CL1511Contig7	B5DEC9_XENTR	SR140_HUMAN	U2 snRNP-associated SURP motif-containing protein (140 kDa Ser/Arg-rich domain protein) (U2-associated protein SR140)	3	0.1	260	1200	170	84	0.50721	Cargo A		112.48		118.292		A1	1766
CL11609Contig1	A4II84_XENTR	ASCC1_HUMAN	Activating signal cointegrator 1 complex subunit 1 (ASC-1 complex subunit p50) (Trip4 complex subunit p50)	-3	6.8	0	940	150	68	0.463264	Cargo A		40.518	61.859	45.509		A1	774
CL13584Contig1	Q3B8D1_XENLA	RT25_HUMAN	28S ribosomal protein S25, mitochondrial (MRP-S25) (S25mt)				10000	130	740	5.51721	Cargo A		21.94	19.922	20.116		A1	1394
CL41Contig10	F6S8R4_XENTR	RAPH1_HUMAN	Ras-associated and pleckstrin homology domains-containing protein 1 (RAPH1) (Amyotrophic lateral sclerosis 2 chromosomal region candidate gene 18 protein) (Amyotrophic lateral sclerosis 2 chromosomal region candidate gene 9 protein) (Lamellipodin) (Proline-rich EVH1 ligand 2) (PREL-2) (Protein RMO1)	-3	29	0	1800	130	690	5.4006	Cargo A		128.4	72.681	135.256		A1	5448
dsrrswapns_comp215276_c2_seq7	Q9I957_XENLA	PAXI_HUMAN	Paxillin	-3	34	0	6200	130	440	3.39259	Cargo A	NESdbO, BioGrid	59.64	59.384	64.505		A1	9599
CL9397Contig1	F6T141_XENTR	HOIL1_HUMAN	RanBP-type and C3HC4-type zinc finger-containing protein 1 (EC 6.3.2.-) (HBV-associated factor 4) (Heme-oxidized IRP2 ubiquitin ligase 1) (HOIL-1) (Hepatitis B virus X-associated protein 4) (RING finger protein 54) (Ubiquitin-conjugating enzyme 7-interacting protein 3)	-3	5.8	0	2500	130	180	1.37872	Cargo A	NESdbO	25.971		57.572		A1	8579
CL14061Contig1	Q6INU1_XENLA	FKBP6_HUMAN	Inactive peptidyl-prolyl cis-trans isomerase FKBP6 (Inactive PPIase FKBP6) (36 kDa FK506-binding protein) (36 kDa FKBP) (FKBP-36) (FK506-binding protein 6) (FKBP-6) (Immunophilin FKBP36)	-3	5.4	0	5500	120	390	3.26732	Cargo A		34.914	34.914	37.214		A1	1526
BP677536	F6T8W8_XENTR	CH033_HUMAN	UPF0488 protein C8orf33	-0.17	14	9.7	23000	110	1600	14.6754	Cargo A		20.511	53.563	24.993		A1	109
CL4307Contig1	Q7ZYD8_XENLA	SYAP1_HUMAN	Synapse-associated protein 1	-3	91	0	17000	110	1200	10.8229	Cargo A		41.564	41.564	39.933		A1	5545
dsrrswapns_comp214415_c1_seq9	F7E0Q1_XENTR	APBA3_HUMAN	Amyloid beta A4 precursor protein-binding family A member 3 (Adapter protein X11gamma) (Neuron-specific X11L2 protein) (Neuronal Munc18-1-interacting protein 3) (Mint-3)	-3	31	0	4300	110	850	7.91877	Cargo A	NESdbO	68.333	81.615	61.454		A1	9534
CL14923Contig1	Q68EZ7_XENLA	CU002_HUMAN	Protein C21orf2 (C21orf-HUMF09G8.5) (YF5/A2)	-3	39	0	810	110	510	4.5348	Cargo A		29.208	29.208	28.34		A1	1709
CL21584Contig1	F6SNZ9_XENTR	ZCHC3_HUMAN	Zinc finger CCHC domain-containing protein 3	-1.36	26	1.1	3300	110	240	2.07046	Cargo A		45.831		43.618		A1	3136
CL1Contig1715	F6ZYP3_XENTR	UBP2L_HUMAN	Ubiquitin-associated protein 2-like (Protein NICE-4)	-1.43	18	0.7	500	110	91	0.801318	Cargo A		100.5	63.015	114.535		A1	2765
CL4342Contig2	CMTR1_XENLA	CMTR1_HUMAN	Cap-specific mRNA (nucleoside-2'-O-)-methyltransferase 1 (EC 2.1.1.57) (Cap methyltransferase 1) (Cap1 2'O-ribose methyltransferase 1) (MTr1) (hMTr1) (FtsJ methyltransferase domain-containing protein 2) (Interferon-stimulated gene 95 kDa protein) (ISG95)	3	0.1	82	780	110	56	0.495819	Cargo A		97.158	97.259	95.321		A1	5575
CL214Contig1	Q801T5_XENLA	CASC3_HUMAN	Protein CASC3 (Cancer susceptibility candidate gene 3 protein) (Metastatic lymph node gene 51 protein) (MLN 51) (Protein barentsz) (Btz)	-3	14	0	740	100	550	5.27546	Cargo A		77.136	77.137	76.278		A1	3125
CL467Contig4	Q32N72_XENLA	UBAP2_HUMAN	Ubiquitin-associated protein 2 (UBAP-2)	-3	42	0	1500	100	270	2.69493	Cargo A		124.42	63.015	117.116		A1	5847
CL1742Contig6	Q3KPN4_XENLA	FR1OP_HUMAN	FGFR1 oncogene partner	-1.8	11	0.2	3400	100	240	2.43088	Cargo A		51.456	50.489	43.065		A1	2192
CL5436Contig1	Q7ZXU8_XENLA	ASCC2_HUMAN	Activating signal cointegrator 1 complex subunit 2 (ASC-1 complex subunit p100) (Trip4 complex subunit p100)	-3	13	0	710	100	51	0.500015	Cargo A		83.548	83.549	86.36		A1	6443
CL3026Contig3	F6VAH9_XENTR	DIAP3_HUMAN	Protein diaphanous homolog 3 (Diaphanous-related formin-3) (DRF3) (MDia2)	-3	17	0	1500	99	110	1.11604	Cargo A	NESdbO	130.6	114.21	136.926		A1	4234
CL2801Contig2	CE41B_XENLA	CEP41_HUMAN	Centrosomal protein of 41 kDa (Cep41) (Testis-specific gene A14 protein)	-3	27	0	7800	97	560	5.77908	Cargo A		41.109	41.109	41.368		A1	3982
CL26Contig11	A5PKQ6_XENLA	SPCS_HUMAN	O-phosphoseryl-tRNA(Sec) selenium transferase (EC 2.9.1.2) (Liver-pancreas antigen) (LP) (SLA-p35) (SLA/LP autoantigen) (Selenocysteine synthase) (Sec synthase) (Selenocysteinyl-tRNA(Sec) synthase) (Sep-tRNA:Sec-tRNA synthase) (SepSecS) (Soluble liver antigen) (SLA) (UGA suppressor tRNA-associated protein) (tRNA(Ser/Sec)-associated antigenic protein)	-1	56	5.7	8800	95	630	6.59669	Cargo A		55.712	55.712	55.726		A1	3873
CL2862Contig2	Q4QR59_XENLA	SEPT6_HUMAN	Septin-6	-3	100	0	8000	94	570	6.09	Cargo A		49.32	49.43	49.717		A1	4056
dsrrswapns_comp212642_c2_seq1	ZC3HF_XENLA	ZC3HF_HUMAN	Zinc finger CCCH domain-containing protein 15 (DRG family-regulatory protein 1) (Likely ortholog of mouse immediate early response erythropoietin 4)	-1.45	140	4.8	11000	93	780	8.37646	Cargo A		48.712	48.713	48.602		A1	9404
CL306Contig2	F6X629_XENTR	STRAA_HUMAN	STE20-related kinase adapter protein alpha (STRAD alpha) (STE20-related adapter protein) (Serologically defined breast cancer antigen NY-BR-96)	-3	7.2	0	3800	91	270	3.0023	Cargo A	NESdbO, BioGrid	40.992	46.837	48.369		A1	4276
CL3407Contig1	Q642S3_XENLA	GCP4_HUMAN	Gamma-tubulin complex component 4 (GCP-4) (hGCP4) (Gamma-ring complex protein 76 kDa) (h76p) (hGrip76)	-3	7.2	0	720	91	52	0.568519	Cargo A		76.036	76.037	76.089		A1	4593
CL8786Contig1	Q6GQE6_XENLA	RU2B_HUMAN	U2 small nuclear ribonucleoprotein B'' (U2 snRNP B'')	3	0	200	1700	87	120	1.42896	Cargo A		25.123	25.123	25.486		A1	8290
CL917Contig4	Q6DDY5_XENLA	RMP_HUMAN	Unconventional prefoldin RPB5 interactor 1 (Protein NNX3) (Protein phosphatase 1 regulatory subunit 19) (RNA polymerase II subunit 5-mediating protein) (RPB5-mediating protein)	-3	39	0	3300	86	240	2.74555	Cargo A		56.146	55.79	59.832		A1	8472
zeinaSSns_comp388076_c1_seq2	Q6IRN5_XENLA	AGFG1_HUMAN	Arf-GAP domain and FG repeat-containing protein 1 (HIV-1 Rev-binding protein) (Nucleoporin-like protein RIP) (Rev-interacting protein) (Rev/Rex activation domain-binding protein)	0.21	19	30	3900	85	280	3.26252	Cargo A		55.647	57.773	58.26		A1	11146
CL2332Contig1	L14AA_XENLA	LS14A_HUMAN	Protein LSM14 homolog A (Protein FAM61A) (Protein SCD6 homolog) (Putative alpha-synuclein-binding protein) (AlphaSNBP) (RNA-associated protein 55A) (hRAP55) (hRAP55A)	-2.73	220	0.4	39000	84	2800	32.9645	Cargo A		52.843	51.168	50.53		A1	3358
CL5566Contig2	F6YH23_XENTR	REN3A_HUMAN	Regulator of nonsense transcripts 3A (Nonsense mRNA reducing factor 3A) (Up-frameshift suppressor 3 homolog A) (hUpf3)	-3	63	0	11000	84	800	9.4419	Cargo A		62.074		54.696		A1	6538
CL9321Contig1	Q6NU66_XENLA	TBCD7_HUMAN	TBC1 domain family member 7 (Cell migration-inducing protein 23)	-1.38	9.3	0.4	880	83	63	0.755983	Cargo A		34.196	34.197	33.972		A1	8545
dsrrswapns_comp206957_c0_seq5	A9JRK7_XENTR	RABL6_HUMAN	Rab-like protein 6 (GTP-binding protein Parf) (Partner of ARF) (Rab-like protein 1) (RBEL1)	-3	37	0	3600	80	260	3.21644	Cargo A		28.626		79.549		A1	9147
CL2420Contig3	A4IFX5_XENLA	HNRPM_HUMAN	Heterogeneous nuclear ribonucleoprotein M (hnRNP M)	1.64	12	530	1600	78	120	1.4803	Cargo A		78.257	77.968	77.516		A1	3471
CL550Contig1	Q505L6_XENLA	R3HD2_HUMAN	R3H domain-containing protein 2	-3	2.5	0	920	78	66	0.846196	Cargo A		111.61	111.237	106.999		A1	6488
CL1009Contig7	Q6DCM5_XENLA	PP4R1_HUMAN	Serine/threonine-protein phosphatase 4 regulatory subunit 1	-3	73	0	13000	75	940	12.5857	Cargo A		106.77	195.331	107.004		A1	218
CL147Contig2	Q66IY3_XENLA	IF2P_HUMAN	Eukaryotic translation initiation factor 5B (eIF-5B) (Translation initiation factor IF-2)	-3	160	0.1	9900	72	710	9.88459	Cargo A		135.58	34.568	138.827		A1	1675
CL358Contig6	PAF1_XENLA	PAF1_HUMAN	RNA polymerase II-associated factor 1 homolog (hPAF1) (Pancreatic differentiation protein 2)	2.12	3.2	420	3800	72	270	3.77911	Cargo A		59.605	59.605	59.976		A1	4779
dsrrswapns_comp212215_c1_seq7	Q08AV3_XENLA			-3	15	0	800	71	57	0.805047	Cargo A		27.416	27.385			A1	9373
CL936Contig2	PCM1_XENLA	PCM1_HUMAN	Pericentriolar material 1 protein (PCM-1) (hPCM-1)	-3	36	0	1400	70	100	1.46673	Cargo A		227.88	227.868	228.533		A1	8568
CL1Contig143	B7ZR20_XENLA	SEPT2_HUMAN	Septin-2 (Neural precursor cell expressed developmentally down-regulated protein 5) (NEDD-5)	-3	290	0	67000	67	4800	71.0424	Cargo A		40.927	40.928	41.487		A1	2720
TC441097	F6Z767_XENTR	E2F5_HUMAN	Transcription factor E2F5 (E2F-5)	0.9	9.8	78	1600	67	120	1.75246	Cargo A		45.135	40.909	37.61		A1	10593
CL26634Contig1	Q0V9E5_XENTR	RT31_HUMAN	28S ribosomal protein S31, mitochondrial (MRP-S31) (S31mt) (Imogen 38)				510	66	310	4.76049	Cargo A		43.286		45.318	MT	A1	3823
CL4421Contig1	A5D8P6_XENLA	OTU6B_HUMAN	OTU domain-containing protein 6B (EC 3.4.19.12) (DUBA-5)	-1.63	61	1.4	1400	66	210	3.17593	Cargo A		35.306	35.307	33.813		A1	5626
CL5424Contig2	S7A6O_XENLA	S7A6O_HUMAN	Probable RNA polymerase II nuclear localization protein SLC7A6OS (ADAMS proteinase-related protein) (Solute carrier family 7 member 6 opposite strand transcript)	-3	22	0	13000	63	900	14.3944	Cargo A		37.094	36.426	35.028		A1	6433
CL589Contig1	RS21_XENLA	RS21_HUMAN	40S ribosomal protein S21	-1.59	2100	55	1700	63	120	1.91061	Cargo A		9.1984	9.214	9.111		A1	6764
CL7919Contig1	Q5XHI8_XENLA	NOB1_HUMAN	RNA-binding protein NOB1 (Phosphorylation regulatory protein HP-10) (Protein ART-4)	-2.22	45	0.3	7400	62	530	8.49955	Cargo A		48.503	48.504	46.675		A1	7899
CL663Contig2	Q5KTT8_XENLA	IF4G2_HUMAN	Eukaryotic translation initiation factor 4 gamma 2 (eIF-4-gamma 2) (eIF-4G 2) (eIF4G 2) (Death-associated protein 5) (DAP-5) (p97)	-3	44	0	2200	62	160	2.51687	Cargo A		101.08	101.849	102.362		A1	7228
CL4756Contig1	TBK1_XENLA	TBK1_HUMAN	Serine/threonine-protein kinase TBK1 (EC 2.7.11.1) (NF-kappa-B-activating kinase) (T2K) (TANK-binding kinase 1)	-3	23	0	1100	61	240	3.88973	Cargo A		83.087	83.271	83.642		A1	5897
CL9719Contig1	Q6GNS6_XENLA	HBS1L_HUMAN	HBS1-like protein (ERFS)	-1.88	84	1.1	5800	60	420	6.94556	Cargo A		75.272	75.273	75.473		A1	8705
BQ399543	MTM1_XENLA	MTM1_HUMAN	Myotubularin (Phosphatidylinositol-3,5-bisphosphate 3-phosphatase) (EC 3.1.3.95) (Phosphatidylinositol-3-phosphate phosphatase) (EC 3.1.3.64)	-3	9.6	0	2200	60	160	2.66523	Cargo A		15.495	215.231	69.932		A1	127
CL8297Contig1	F7EP88_XENTR	REN3B_HUMAN	Regulator of nonsense transcripts 3B (Nonsense mRNA reducing factor 3B) (Up-frameshift suppressor 3 homolog B) (hUpf3B) (Up-frameshift suppressor 3 homolog on chromosome X) (hUpf3p-X)	-3	20	0	3700	59	260	4.46862	Cargo A		36.794		57.762		A1	8077
CL8675Contig1	A0JMU3_XENLA	RNF31_HUMAN	E3 ubiquitin-protein ligase RNF31 (EC 6.3.2.-) (HOIL-1-interacting protein) (HOIP) (RING finger protein 31) (Zinc in-between-RING-finger ubiquitin-associated domain protein)	-2.15	13	0.1	890	59	120	2.04719	Cargo A		117.78	117.781	119.652		A1	8243
CL12095Contig1	B1H2Q5_XENTR	C2D1A_HUMAN	Coiled-coil and C2 domain-containing protein 1A (Akt kinase-interacting protein 1) (Five prime repressor element under dual repression-binding protein 1) (FRE under dual repression-binding protein 1) (Freud-1) (Putative NF-kappa-B-activating protein 023N)	-3	45	0	7900	58	570	9.75584	Cargo A		81.674	78.724	104.062		A1	966
CL1Contig377	F6PHX1_XENTR	AP3D1_HUMAN	AP-3 complex subunit delta-1 (AP-3 complex subunit delta) (Adaptor-related protein complex 3 subunit delta-1) (Delta-adaptin)	-1.33	34	1.6	5600	57	400	7.03917	Cargo A		142.36	90.441	130.158		A1	2816
CL4823Contig1	KCMF1_XENLA	KCMF1_HUMAN	E3 ubiquitin-protein ligase KCMF1 (EC 6.3.2.-) (FGF-induced in gastric cancer) (Potassium channel modulatory factor) (PCMF) (ZZ-type zinc finger-containing protein 1)	-3	12	0	2400	55	170	3.08711	Cargo A		49.191	41.943	41.945		A1	5965
CL6457Contig1	Q66J62_XENLA	SEP11_HUMAN	Septin-11	-3	170	0	8100	53	2500	47.4798	Cargo A		49.565	49.565	49.398		A1	7118
CL2070Contig4	F6ZM66_XENTR	MAP1S_HUMAN	Microtubule-associated protein 1S (MAP-1S) (BPY2-interacting protein 1) (Microtubule-associated protein 8) (Variable charge Y chromosome 2-interacting protein 1) (VCY2-interacting protein 1) (VCY2IP-1) [Cleaved into: MAP1S heavy chain; MAP1S light chain]	-3	81	0	1800	53	130	2.49117	Cargo A		101.91		112.211		A1	2996
CL10615Contig1	Q5U225_XENLA	ZNHI2_HUMAN	Zinc finger HIT domain-containing protein 2 (Protein FON)	-3	3.7	0	1100	53	81	1.51905	Cargo A		56.124	21.222	42.884		A1	415
CL5303Contig2	Q66J73_XENLA	ABCF3_HUMAN	ATP-binding cassette sub-family F member 3	-3	770	0.6	840	52	4700	90.0341	Cargo A		100.52	100.523	79.745		A1	6338
CL2571Contig4	Q52KY5_XENLA	AP3B2_HUMAN	AP-3 complex subunit beta-2 (Adaptor protein complex AP-3 subunit beta-2) (Adaptor-related protein complex 3 subunit beta-2) (Beta-3B-adaptin) (Clathrin assembly protein complex 3 beta-2 large chain) (Neuron-specific vesicle coat protein beta-NAP)	-2.54	42	0.1	4800	51	690	13.4476	Cargo A		121.6	121.606	119.059		A1	3696
dsrrswapns_comp214187_c4_seq1	Q63ZR9_XENLA	TFDP1_HUMAN	Transcription factor Dp-1 (DRTF1-polypeptide 1) (DRTF1) (E2F dimerization partner 1)	0.48	9.5	29	1400	51	100	1.98229	Cargo A		45.221	45.222	45.07		A1	9514
dsrrswapns_comp193908_c3_seq2	F7EJN8_XENTR	PASK_HUMAN	PAS domain-containing serine/threonine-protein kinase (PAS-kinase) (PASKIN) (hPASK) (EC 2.7.11.1)	-3	9.5	0	1400	51	100	1.95412	Cargo A		129.9	81.54	142.929		A1	9052
CL12941Contig1	F6SVR5_XENTR	ELOA1_HUMAN	Transcription elongation factor B polypeptide 3 (Elongin 110 kDa subunit) (Elongin-A) (EloA) (RNA polymerase II transcription factor SIII subunit A1) (SIII p110)	2.28	1.2	230	740	51	53	1.04612	Cargo A		69.193	40.304	89.909		A1	1200
CL7648Contig1	Q7SYY3_XENLA	RT17_HUMAN	28S ribosomal protein S17, mitochondrial (MRP-S17) (S17mt)				15000	50	1100	21.769	Cargo A		15.666	15.666	14.502	MT	A1	7769
zeinaSSns_comp388025_c1_seq4	Q1JV76_XENLA	ARFG3_HUMAN	ADP-ribosylation factor GTPase-activating protein 3 (ARF GAP 3)	-2.19	25	0.2	1900	50	140	2.75245	Cargo A		56.865	58.006	56.928		A1	11144
CL11768Contig1	UBA5_XENLA	UBA5_HUMAN	Ubiquitin-like modifier-activating enzyme 5 (Ubiquitin-activating enzyme 5) (ThiFP1) (UFM1-activating enzyme) (Ubiquitin-activating enzyme E1 domain-containing protein 1)	-3	290	0	66000	49	4700	97.0096	Cargo A		44.169	22.451	44.863		A1	831
CL544Contig3	Q7ZX74_XENLA	CCDC6_HUMAN	Coiled-coil domain-containing protein 6 (Papillary thyroid carcinoma-encoded protein) (Protein H4)	-0.28	46	24	14000	49	990	20.3104	Cargo A		56.243	50.119	53.291		A1	6457
CL18239Contig1	A4IHJ5_XENTR	RT28_HUMAN	28S ribosomal protein S28, mitochondrial (MRP-S28) (S28mt) (28S ribosomal protein S35, mitochondrial) (MRP-S35) (S35mt)				5000	48	360	7.40572	Cargo A		18.634		20.843	MT	A1	2320
TC464706	Q4KLF0_XENLA	RS30_HUMAN	40S ribosomal protein S30	-1.84	8200	120	7400	47	530	11.2149	Cargo A		4.9068	14.512	6.648		A1	5301
CL1487Contig5	B1H1Q8_XENLA	POF1B_HUMAN	Protein POF1B (Premature ovarian failure protein 1B)	-3	51	0	1600	47	390	8.25952	Cargo A		76.173	71.302	68.065		A1	1697
CL4953Contig1	Q0P3R7_XENLA	EI2BD_HUMAN	Translation initiation factor eIF-2B subunit delta (eIF-2B GDP-GTP exchange factor subunit delta)	-3	240	0	25000	45	1800	39.6039	Cargo A		62.31	62.311	57.557		A1	6051
CL9842Contig1	Q8AVV3_XENLA	AP3S1_HUMAN	AP-3 complex subunit sigma-1 (AP-3 complex subunit sigma-3A) (Adaptor-related protein complex 3 subunit sigma-1) (Clathrin-associated/assembly/adaptor protein, small 3) (Sigma-3A-adaptin) (Sigma3A-adaptin) (Sigma-adaptin 3a)	-3	34	0	3400	45	740	16.2958	Cargo A		21.779	21.779	21.732		A1	8759
dsrrswapns_comp215791_c1_seq12		AKAP1_HUMAN	A-kinase anchor protein 1, mitochondrial (A-kinase anchor protein 149 kDa) (AKAP 149) (Dual specificity A-kinase-anchoring protein 1) (D-AKAP-1) (Protein kinase A-anchoring protein 1) (PRKA1) (Spermatid A-kinase anchor protein 84) (S-AKAP84)				3600	45	260	5.72366	Cargo A		112.19		97.342	MT	A1	9656
CL1409Contig4	SEPT7_XENLA	SEPT7_HUMAN	Septin-7 (CDC10 protein homolog)	-3	200	0	72000	42	5200	123.019	Cargo A		48.615	49.469	50.68		A1	1534
dsrrswapns_comp217764_c2_seq2	Q6DDZ8_XENLA	TNIK_HUMAN	TRAF2 and NCK-interacting protein kinase (EC 2.7.11.1)	-2.04	45	0.4	2100	42	400	9.37283	Cargo A		156.61	144.206	154.943		A1	9871
CL8646Contig1	F6UQE9_XENTR	PIWL2_HUMAN	Piwi-like protein 2 (Cancer/testis antigen 80) (CT80)	-3	7.9	0	3900	42	280	6.73029	Cargo A		110.56	97.645	109.849		A1	8231
CL3090Contig3	Q6DDK8_XENLA	RBL2B_HUMAN	Rab-like protein 2B	-3	16	0	5500	41	390	9.56226	Cargo A		25.874	25.874	26.101		A1	4306
CL7063Contig1	Q5M7C4_XENLA	AP3S2_HUMAN	AP-3 complex subunit sigma-2 (AP-3 complex subunit sigma-3B) (Adaptor-related protein complex 3 subunit sigma-2) (Sigma-3B-adaptin) (Sigma3B-adaptin) (Sigma-adaptin 3b)	-3	6.3	0	2500	41	180	4.36096	Cargo A		22.064	22.064	22.017		A1	7484
CL7122Contig1	Q0IH16_XENLA	APC5_HUMAN	Anaphase-promoting complex subunit 5 (APC5) (Cyclosome subunit 5)	-0.11	20	16	960	41	68	1.65602	Cargo A		85.512	36.099	85.077		A1	7523
CL4847Contig2	WDR37_XENLA	WDR37_HUMAN	WD repeat-containing protein 37	-2.65	13	0	910	41	65	1.601	Cargo A		54.993	54.994	54.665		A1	5977
CL3499Contig2	Q66J65_XENLA	PRP4_HUMAN	U4/U6 small nuclear ribonucleoprotein Prp4 (PRP4 homolog) (hPrp4) (U4/U6 snRNP 60 kDa protein) (WD splicing factor Prp4)	2.62	1.1	440	760	41	55	1.34709	Cargo A		56.705	54.392	58.449		A1	4676
CL490Contig3	Q52L12_XENLA	LPP_HUMAN	Lipoma-preferred partner (LIM domain-containing preferred translocation partner in lipoma)	-2.38	380	1.6	3200	40	6500	162.304	Cargo A	NESdbO	66.816	67.334	65.746		A1	6021
CL3573Contig1	Q498G1_XENLA	RENT2_HUMAN	Regulator of nonsense transcripts 2 (Nonsense mRNA reducing factor 2) (Up-frameshift suppressor 2 homolog) (hUpf2)	-3	37	0	3700	40	660	16.5896	Cargo A		146.86	146.866	147.81		A1	4764
dsrrswapns_comp216083_c1_seq13	F6PPZ8_XENTR	CYLD_HUMAN	Ubiquitin carboxyl-terminal hydrolase CYLD (EC 3.4.19.12) (Deubiquitinating enzyme CYLD) (Ubiquitin thioesterase CYLD) (Ubiquitin-specific-processing protease CYLD)	-3	5.8	0	1200	39	84	2.14758	Cargo A		27.032		107.316		A1	9678
dsrrswapns_comp217408_c3_seq5	A1L2H5_XENLA	AP1B1_HUMAN	AP-1 complex subunit beta-1 (Adaptor protein complex AP-1 subunit beta-1) (Adaptor-related protein complex 1 subunit beta-1) (Beta-1-adaptin) (Beta-adaptin 1) (Clathrin assembly protein complex 1 beta large chain) (Golgi adaptor HA1/AP1 adaptin beta subunit)	-3	130	0.1	1100	39	76	1.93794	Cargo A		103.91	103.886	104.637		A1	9818
CL1Contig248	B1WBC3_XENLA	HNRPR_HUMAN	Heterogeneous nuclear ribonucleoprotein R (hnRNP R)	2.89	0.5	390	760	39	55	1.40866	Cargo A		57.184	57.185	70.943		A1	2789
CL1781Contig2	Q498G4_XENLA	SEPT9_HUMAN	Septin-9 (MLL septin-like fusion protein MSF-A) (MLL septin-like fusion protein) (Ovarian/Breast septin) (Ov/Br septin) (Septin D1)	-1.82	310	4.7	50000	38	3600	93.0658	Cargo A		38.697	38.666	65.401		A1	2244
CL5358Contig3	Q5PPX3_XENLA	AP3M2_HUMAN	AP-3 complex subunit mu-2 (Adaptor-related protein complex 3 subunit mu-2) (Clathrin assembly protein assembly protein complex 3 mu-2 medium chain) (Clathrin coat assembly protein AP47 homolog 2) (Clathrin coat-associated protein AP47 homolog 2) (Golgi adaptor AP-1 47 kDa protein homolog 2) (HA1 47 kDa subunit homolog 2) (Mu3B-adaptin) (P47B)	-2.26	68	0.4	20000	38	1400	38.489	Cargo A		46.798	46.768	46.977		A1	6375
CL3201Contig1	RPAP3_XENLA	RPAP3_HUMAN	RNA polymerase II-associated protein 3	-3	58	0	5000	38	360	9.37116	Cargo A		75.078	75.106	75.719		A1	4406
CL1282Contig2	Q6GPE1_XENLA	AP1G1_HUMAN	AP-1 complex subunit gamma-1 (Adaptor protein complex AP-1 subunit gamma-1) (Adaptor-related protein complex 1 subunit gamma-1) (Clathrin assembly protein complex 1 gamma-1 large chain) (Gamma1-adaptin) (Golgi adaptor HA1/AP1 adaptin subunit gamma-1)	-3	100	0	2100	38	150	3.87464	Cargo A		90.44	90.441	91.351		A1	1173
zeinaSSns_comp384242_c0_seq1	LST8_XENLA	LST8_HUMAN	Target of rapamycin complex subunit LST8 (TORC subunit LST8) (G protein beta subunit-like) (Gable) (Protein GbetaL) (Mammalian lethal with SEC13 protein 8) (mLST8)	-3	1.8	0	1600	38	110	3.01036	Cargo A		40.941	36.118	35.876		A1	10973
CL734Contig1	RT07_XENLA	RT07_HUMAN	28S ribosomal protein S7, mitochondrial (MRP-S7) (S7mt) (bMRP-27a) (bMRP27a)				5100	37	370	9.77971	Cargo A		27.312	27.313	28.134	MT	A1	7616
CL2223Contig4	A2BD76_XENLA	RPB7_HUMAN	DNA-directed RNA polymerase II subunit RPB7 (RNA polymerase II subunit B7) (DNA-directed RNA polymerase II subunit G) (RNA polymerase II 19 kDa subunit) (RPB19)	0.91	17	140	1500	36	110	3.05542	Cargo A		19.248	19.248	19.294		A1	3225
zeinaSSns_comp385596_c0_seq2	Q6Q4H9_XENLA	IF2B_HUMAN	Eukaryotic translation initiation factor 2 subunit 2 (Eukaryotic translation initiation factor 2 subunit beta) (eIF-2-beta)	-3	530	0	43000	34	3100	89.5735	Cargo A		38.584	38.601	38.388		A1	6427
CL13118Contig1	F6Z720_XENTR	ALG13_HUMAN	Putative bifunctional UDP-N-acetylglucosamine transferase and deubiquitinase ALG13 (EC 2.4.1.141) (EC 3.4.19.12) (Asparagine-linked glycosylation 13 homolog) (Glycosyltransferase 28 domain-containing protein 1) (UDP-N-acetylglucosamine transferase subunit ALG13 homolog)	-3	46	0	1400	34	650	19.3352	Cargo A		96.027		126.056		A1	1258
zeinaSSns_comp378084_c0_seq1	Q52KE0_XENLA	LSM2_HUMAN	U6 snRNA-associated Sm-like protein LSm2 (Protein G7b) (Small nuclear ribonuclear protein D homolog) (snRNP core Sm-like protein Sm-x5)	0.36	690	1600	6900	34	490	14.4703	Cargo A		10.82	10.82	10.835		A1	10902
CL2777Contig3	DRG1_XENLA	DRG1_HUMAN	Developmentally-regulated GTP-binding protein 1 (DRG-1) (Neural precursor cell expressed developmentally down-regulated protein 3) (NEDD-3)	-2.58	220	0.6	32000	33	2300	68.6197	Cargo A		40.414	40.415	40.542		A1	3949
CL4706Contig1	B7ZQW3_XENLA	SLBP_HUMAN	Histone RNA hairpin-binding protein (Histone stem-loop-binding protein)	1.92	1.7	140	5600	33	400	11.9994	Cargo A		28.917	28.917	31.286		A1	5869
CL1776Contig3	F6ZJK5_XENTR	PDPK1_HUMAN	3-phosphoinositide-dependent protein kinase 1 (hPDK1) (EC 2.7.11.1)	-1.07	36	3	1100	33	79	2.38126	Cargo A	NESdbO	58.387	40.47	63.152		A1	2241
TC435183	Q8AVU8_XENLA	EI2BG_HUMAN	Translation initiation factor eIF-2B subunit gamma (eIF-2B GDP-GTP exchange factor subunit gamma)	-3	190	0	72000	32	2700	86.2382	Cargo A		51.384	51.182	50.24		A1	10547
CL3890Contig3	Q7ZY93_XENLA	MAP2_HUMAN	Methionine aminopeptidase 2 (MAP 2) (MetAP 2) (EC 3.4.11.18) (Initiation factor 2-associated 67 kDa glycoprotein) (p67) (p67eIF2) (Peptidase M)	-3	390	0	16000	32	1200	36.1114	Cargo A		53.848	51.48	52.892		A1	5108
CL11460Contig1	A8WH50_XENLA	IF3M_HUMAN	Translation initiation factor IF-3, mitochondrial (IF-3(Mt)) (IF-3Mt) (IF3(mt)) (IF3mt)				1300	32	90	2.85999	Cargo A		32.874	78.117	31.725	MT	A1	719
CL400Contig6	F6YBA0_XENTR	SBNO1_HUMAN	Protein strawberry notch homolog 1 (Monocyte protein 3) (MOP-3)	3	0.1	160	1200	32	82	2.57954	Cargo A		151.03		154.312		A1	5263
CL5971Contig1	F6R6Q4_XENTR	EI2BE_HUMAN	Translation initiation factor eIF-2B subunit epsilon (eIF-2B GDP-GTP exchange factor subunit epsilon)	-3	180	0	570	31	2100	69.4328	Cargo A		79.475	51.182	80.38		A1	6816
CL8226Contig1	F7A198_XENTR	ERC6L_HUMAN	DNA excision repair protein ERCC-6-like (EC 3.6.4.12) (ATP-dependent helicase ERCC6-like) (PLK1-interacting checkpoint helicase) (Tumor antigen BJ-HCC-15)	-1.92	84	1	2700	31	690	22.3702	Cargo A		152.9	100.673	141.103		A1	8047
CL4486Contig1	Q7ZXJ2_XENLA	ZN330_HUMAN	Zinc finger protein 330 (Nucleolar autoantigen 36) (Nucleolar cysteine-rich protein)	-3	19	0	5400	31	390	12.4947	Cargo A		35.302	35.302	36.201		A1	5681
CL4949Contig1	Q5PQ14_XENLA	MTMR9_HUMAN	Myotubularin-related protein 9	-3	14	0	1500	31	100	3.3503	Cargo A		63.446	63.446	63.462		A1	6047
CL1444Contig3	SHC1_XENLA	SHC1_HUMAN	SHC-transforming protein 1 (SHC-transforming protein 3) (SHC-transforming protein A) (Src homology 2 domain-containing-transforming protein C1) (SH2 domain protein C1)	-1.73	11	0.2	1100	31	81	2.65072	Cargo A		52.367	51.73	62.822		A1	1607
CL98Contig12	F7CZT8_XENTR	KAP2_HUMAN	cAMP-dependent protein kinase type II-alpha regulatory subunit (PRKAR2A)	-3	13	0	35000	30	2500	82.6924	Cargo A		45.881	45.191	45.518		A1	8790
CL1266Contig3	Q6AZU3_XENLA	SAHH3_HUMAN	Putative adenosylhomocysteinase 3 (AdoHcyase 3) (EC 3.3.1.1) (IP(3)Rs binding protein released with IP(3) 2) (IRBIT2) (S-adenosyl-L-homocysteine hydrolase 3) (S-adenosylhomocysteine hydrolase-like protein 2)	-0.54	4.5	1.3	1800	30	130	4.21674	Cargo A		64.682	64.189	66.721		A1	1123
CL1694Contig4	F7E2N6_XENTR	TSC1_HUMAN	Hamartin (Tuberous sclerosis 1 protein)	-3	32	0	1100	30	78	2.64829	Cargo A		124.89		129.767		A1	2094
CL781Contig3	DHX29_XENLA	DHX29_HUMAN	ATP-dependent RNA helicase DHX29 (EC 3.6.4.13) (DEAH box protein 29) (Nucleic acid helicase DDXx)	-1.82	37	0.6	760	30	54	1.77543	Cargo A		153.32	153.318	155.236		A1	7855
CL10774Contig1	Q6NTU1_XENLA	RT26_HUMAN	28S ribosomal protein S26, mitochondrial (MRP-S26) (S26mt) (28S ribosomal protein S13, mitochondrial) (MRP-S13) (S13mt)				12000	29	840	28.9241	Cargo A		24.123	174.476	24.212	MT	A1	469
CL624Contig4	Q641I5_XENLA	SC24C_HUMAN	Protein transport protein Sec24C (SEC24-related protein C)	-2.4	160	0.6	710	29	430	14.9467	Cargo A		123.52	123.522	118.325		A1	6982
CL308Contig6	F6VEI6_XENTR	KHDR1_HUMAN	KH domain-containing, RNA-binding, signal transduction-associated protein 1 (GAP-associated tyrosine phosphoprotein p62) (Src-associated in mitosis 68 kDa protein) (Sam68) (p21 Ras GTPase-activating protein-associated p62) (p68)	3	0	440	2200	29	160	5.48213	Cargo A		36.378	37.943	48.227		A1	4303
CL8568Contig1	GPN3_XENLA	GPN3_HUMAN	GPN-loop GTPase 3 (ATP-binding domain 1 family member C)	-3	24	0	780	29	56	1.91115	Cargo A		33.057	33.058	32.761		A1	8203
dsrrswapns_comp213971_c0_seq1	Q7ZY57_XENLA	IF2G_HUMAN	Eukaryotic translation initiation factor 2 subunit 3 (Eukaryotic translation initiation factor 2 subunit gamma X) (eIF-2-gamma X) (eIF-2gX)	-2.24	970	5.6	19000	28	6800	238.587	Cargo A		51.297	51.298	51.109		A1	9494
CL25373Contig1	F6R468_XENTR	RT05_HUMAN	28S ribosomal protein S5, mitochondrial (MRP-S5) (S5mt)				7500	28	540	19.0569	Cargo A		44.208		48.006		A1	3641
CL3179Contig2	Q7ZY58_XENLA	CDC73_HUMAN	Parafibromin (Cell division cycle protein 73 homolog) (Hyperparathyroidism 2 protein)	1.88	6.1	460	5900	28	420	15.2148	Cargo A		60.681	60.682	60.577		A1	4387
CL7071Contig1	A9JTW8_XENTR	RBFA_HUMAN	Putative ribosome-binding factor A, mitochondrial				2800	28	200	7.28653	Cargo A		39.03		38.359	MT	A1	7487
CL8393Contig1	Q569T5_XENLA	RT18B_HUMAN	28S ribosomal protein S18b, mitochondrial (MRP-S18-b) (Mrps18-b) (S18mt-b) (28S ribosomal protein S18-2, mitochondrial) (MRP-S18-2)				2300	28	160	5.89668	Cargo A		24.216	24.988	29.396	MT	A1	8123
CL2444Contig1	A9JS80_XENLA	RT27_HUMAN	28S ribosomal protein S27, mitochondrial (MRP-S27) (S27mt)				8600	27	620	23.2156	Cargo A		46.633	45.939	47.611		A1	3498
zeinaSSns_comp389171_c0_seq1	Q6PCI0_XENLA	PP6R1_HUMAN	Serine/threonine-protein phosphatase 6 regulatory subunit 1 (SAPS domain family member 1)	-3	120	0	610	27	580	21.1331	Cargo A		97.826	97.801	96.724		A1	11247
zeinaSSns_comp387677_c1_seq6	Q6DE61_XENLA	KAPCA_HUMAN	cAMP-dependent protein kinase catalytic subunit alpha (PKA C-alpha) (EC 2.7.11.11)	-3	2.2	0	1900	27	140	5.05055	Cargo A		40.469	40.47	40.59		A1	1453
CL4442Contig2	Q0D265_XENLA	RT02_HUMAN	28S ribosomal protein S2, mitochondrial (MRP-S2) (S2mt)				1600	27	120	4.35194	Cargo A		30.745	31.746	33.249		A1	5645
CL7415Contig1	Q6NTM8_XENLA	KAP3_HUMAN	cAMP-dependent protein kinase type II-beta regulatory subunit	-3	0.4	0	8800	26	630	24.2519	Cargo A		45.19	45.191	46.302		A1	7647
CL9152Contig2	Q6GR38_XENLA	PICAL_HUMAN	Phosphatidylinositol-binding clathrin assembly protein (Clathrin assembly lymphoid myeloid leukemia protein)	-1.17	62	4.2	3200	26	230	8.69571	Cargo A		71.62	49.248	70.755		A1	8463
CL5655Contig1	F7ETP8_XENTR	DHX57_HUMAN	Putative ATP-dependent RNA helicase DHX57 (EC 3.6.4.13) (DEAH box protein 57)	-0.82	26	3.9	940	26	67	2.58751	Cargo A		157.22	153.318	155.604		A1	6583
CL12214Contig1	Q3B8L5_XENLA	HAUS1_HUMAN	HAUS augmin-like complex subunit 1 (Coiled-coil domain-containing protein 5) (Enhancer of invasion-cluster) (HEI-C)	-3	38	0	720	26	52	1.98779	Cargo A		32.609	100.564	31.863		A1	992
TC442512	RS15_XENLA	RS15_HUMAN	40S ribosomal protein S15 (RIG protein)	-1.84	2800	40	17000	25	1200	47.8356	Cargo A		17.103	16.975	17.04		A1	2190
TC443931	Q6AZL7_XENLA	RS26_HUMAN	40S ribosomal protein S26	-1.75	3000	54	16000	25	1100	43.7084	Cargo A		16.204	13.093	13.015		A1	10616
CL6291Contig1	PTCD3_XENLA	PTCD3_HUMAN	Pentatricopeptide repeat domain-containing protein 3, mitochondrial (28S ribosomal protein S39, mitochondrial) (MRP-S39) (Transformation-related gene 15 protein) (TRG-15)				1200	25	590	23.3362	Cargo A		76.304	76.252	78.55	MT	A1	7003
zeinaSSns_comp383487_c0_seq3	Q7ZX93_XENLA	FBRL_HUMAN	rRNA 2'-O-methyltransferase fibrillarin (EC 2.1.1.-) (34 kDa nucleolar scleroderma antigen) (Histone-glutamine methyltransferase)	2.72	4.1	2100	2800	25	200	8.16184	Cargo A		30.232	91.506	33.784		A1	577
CL2070Contig3	F6ZM66_XENTR	MAP1B_HUMAN	Microtubule-associated protein 1B (MAP-1B) [Cleaved into: MAP1B heavy chain; MAP1 light chain LC1]	-3	140	0	2100	25	150	5.99429	Cargo A		143.71		270.634		A1	2995
zeinaSSns_comp387622_c1_seq1	Q7T0N9_XENLA	CDC23_HUMAN	Cell division cycle protein 23 homolog (Anaphase-promoting complex subunit 8) (APC8) (Cyclosome subunit 8)	0.36	17	40	1900	25	130	5.33991	Cargo A		67.512	67.42	68.834		A1	11105
CL4016Contig1	A2VD56_XENLA	NEMF_HUMAN	Nuclear export mediator factor NEMF (Antigen NY-CO-1) (Serologically defined colon cancer antigen 1)	-3	69	0	1500	25	110	4.15856	Cargo A		121.21	103.241	122.954		A1	5272
CL26607Contig1	F6W7L3_XENTR	RT23_HUMAN	28S ribosomal protein S23, mitochondrial (MRP-S23) (S23mt)				9000	24	640	27.3788	Cargo A		21.49		21.771		A1	3822
CL11931Contig1	A9JS90_XENLA	RT35_HUMAN	28S ribosomal protein S35, mitochondrial (MRP-S35) (S35mt) (28S ribosomal protein S28, mitochondrial) (MRP-S28) (S28mt)				8600	24	610	25.5667	Cargo A		37.098	126.416	36.844	MT	A1	894
CL8814Contig1	COPG2_XENLA	COPG2_HUMAN	Coatomer subunit gamma-2 (Gamma-2-coat protein) (Gamma-2-COP)	-1.67	20	0.4	3600	24	260	10.9305	Cargo A		97.819	97.792	97.622		A1	8307
zeinaSSns_comp388787_c0_seq11	Q6DCU2_XENLA	WNK1_HUMAN	Serine/threonine-protein kinase WNK1 (EC 2.7.11.1) (Erythrocyte 65 kDa protein) (p65) (Kinase deficient protein) (Protein kinase lysine-deficient 1) (Protein kinase with no lysine 1) (hWNK1)	-3	26	0	1900	24	140	5.67386	Cargo A		194.98	49.692	250.794		A1	3324
CL4158Contig2	Q6DD18_XENLA	SYNC_HUMAN	Asparagine--tRNA ligase, cytoplasmic (EC 6.1.1.22) (Asparaginyl-tRNA synthetase) (AsnRS)	-3	680	0.3	5900	23	7200	309.906	Cargo A		64.811	64.812	62.943		A1	5417
CL2323Contig1	RS6_XENLA	RS6_HUMAN	40S ribosomal protein S6 (Phosphoprotein NP33)	-1.43	3500	130	8100	23	4200	178.301	Cargo A		28.676	28.677	28.681		A1	3355
CL2809Contig4	Q6GNR2_XENLA	RENT1_HUMAN	Regulator of nonsense transcripts 1 (EC 3.6.4.-) (ATP-dependent helicase RENT1) (Nonsense mRNA reducing factor 1) (NORF1) (Up-frameshift suppressor 1 homolog) (hUpf1)	-1.56	110	3.1	930	23	1300	54.4634	Cargo A		121.99	121.959	124.345		A1	3991
TC462673	Q7ZXI5_XENLA	SNRPA_HUMAN	U1 small nuclear ribonucleoprotein A (U1 snRNP A) (U1-A) (U1A)	2.16	1.8	260	850	23	61	2.60949	Cargo A		28.023	31.609	31.28		A1	3262
CL3960Contig1	Q7ZTR0_XENLA	COPB2_HUMAN	Coatomer subunit beta' (Beta'-coat protein) (Beta'-COP) (p102)	-2.6	210	0.5	5100	22	2200	100.524	Cargo A		103.45	102.948	102.487		A1	5195
CL10041Contig1	Q0IH14_XENLA	RT09_HUMAN	28S ribosomal protein S9, mitochondrial (MRP-S9) (S9mt)				7200	22	510	23.1366	Cargo A		46.542	63.893	45.835	MT	A1	195
CL14196Contig1	A9JS75_XENLA	RT15_HUMAN	28S ribosomal protein S15, mitochondrial (MRP-S15) (S15mt)				5900	22	420	19.3169	Cargo A		32.567	29.026	29.842	MT	A1	1554
CL20124Contig1	Q6GP22_XENLA	RWDD1_HUMAN	RWD domain-containing protein 1 (DRG family-regulatory protein 2)	-3	250	0	4800	22	350	16.0906	Cargo A		25.911	25.911	27.94		A1	2919
CL1797Contig2	Q0P3S3_XENLA	SPF45_HUMAN	Splicing factor 45 (45 kDa-splicing factor) (RNA-binding motif protein 17)	3	0.2	290	2000	22	140	6.37713	Cargo A		44.783	44.784	44.962		A1	2274
zeinaSSns_comp389395_c0_seq1	WDR44_XENLA	WDR44_HUMAN	WD repeat-containing protein 44 (Rabphilin-11)	-3	50	0	1300	22	95	4.34072	Cargo A		103.96	101.686	101.366		A1	11283
CL6113Contig1	MTHSD_XENLA	MTHSD_HUMAN	Methenyltetrahydrofolate synthase domain-containing protein	-0.39	20	8.2	860	22	62	2.77743	Cargo A		49.97	46.149	42.173		A1	6909
dsrrswapns_comp203435_c1_seq1	Q498H7_XENLA	RPC4_HUMAN	DNA-directed RNA polymerase III subunit RPC4 (RNA polymerase III subunit C4) (DNA-directed RNA polymerase III subunit D) (Protein BN51) (RNA polymerase III 47 kDa subunit) (RPC53 homolog)	2.38	1.9	470	760	22	55	2.45796	Cargo A		43.865	43.866	44.396		A1	9099
CL4305Contig3	Q7ZWV0_XENLA	KAPCB_HUMAN	cAMP-dependent protein kinase catalytic subunit beta (PKA C-beta) (EC 2.7.11.11)	-2.26	85	0.5	41000	21	2900	138.78	Cargo A		40.665	40.666	40.623		A1	5544
CL4898Contig3	Q7ZYR9_XENLA	EI2BB_HUMAN	Translation initiation factor eIF-2B subunit beta (S20I15) (S20III15) (eIF-2B GDP-GTP exchange factor subunit beta)	-3	240	0	24000	21	1700	78.973	Cargo A		38.968	34.221	38.99		A1	6007
CL537Contig7	Q8AVM2_XENLA	IF5_HUMAN	Eukaryotic translation initiation factor 5 (eIF-5)	-1.9	240	3	17000	21	1200	59.2342	Cargo A		49.623	49.623	49.223		A1	6395
CL15044Contig1	F7CHD4_XENTR	RT22_HUMAN	28S ribosomal protein S22, mitochondrial (MRP-S22) (S22mt)				2100	21	900	42.8982	Cargo A		37.588		41.28		A1	1747
CL10233Contig1	Q7ZWW8_XENLA	RT34_HUMAN	28S ribosomal protein S34, mitochondrial (MRP-S34) (S34mt)				6900	21	500	23.8751	Cargo A		25.664	116.079	25.65		A1	269
CL10917Contig1	CH2BB_XENLA	CHM2B_HUMAN	Charged multivesicular body protein 2b (CHMP2.5) (Chromatin-modifying protein 2b) (CHMP2b) (Vacuolar protein sorting-associated protein 2-2) (Vps2-2) (hVps2-2)	-0.08	54	45	3200	21	230	11.046	Cargo A		23.948	77.279	23.907		A1	529
CL19418Contig1	RT24B_XENLA	RT24_HUMAN	28S ribosomal protein S24, mitochondrial (MRP-S24) (S24mt) (bMRP-47) (bMRP47)				3000	21	210	9.95897	Cargo A		20.474	19.373	19.015	MT	A1	1614
CL12624Contig1	WDR92_XENLA	WDR92_HUMAN	WD repeat-containing protein 92 (WD repeat-containing protein Monad)	-1.77	36	0.6	2900	21	210	9.94944	Cargo A		39.363	129.507	39.74		A1	1115
CL11397Contig1	ELP4_XENLA	ELP4_HUMAN	Elongator complex protein 4 (hELP4) (PAX6 neighbor gene protein)	-3	64	0	2600	21	190	9.04575	Cargo A		44.864	107.775	46.588		A1	690
CL9199Contig1	WASH1_XENLA	WASH2_HUMAN	WAS protein family homolog 2 (CXYorf1-like protein on chromosome 2) (Protein FAM39B)	-0.99	14	1.5	740	21	53	2.52915	Cargo A		51.123	51.124	50.312		A1	8481
CL1955Contig1	Q52L13_XENLA	PPP6_HUMAN	Serine/threonine-protein phosphatase 6 catalytic subunit (PP6C) (EC 3.1.3.16) [Cleaved into: Serine/threonine-protein phosphatase 6 catalytic subunit, N-terminally processed]	-1.22	100	6	1100	20	1100	53.9158	Cargo A		35.143	35.143	35.144		A1	2576
CL1322Contig1	Q7ZWW5_XENLA	ABCF2_HUMAN	ATP-binding cassette sub-family F member 2 (Iron-inhibited ABC transporter 2)	-2.47	550	1.9	4200	20	300	15.321	Cargo A		69.905	69.113	71.29		A1	1284
CL8291Contig1	Q6INQ1_XENLA	BYST_HUMAN	Bystin	1.26	15	280	1400	20	100	4.92715	Cargo A		49.302	49.303	49.601		A1	8072
CL1011Contig4	Q6GR46_XENLA	COPE_HUMAN	Coatomer subunit epsilon (Epsilon-coat protein) (Epsilon-COP)	-2.42	150	0.6	38000	19	2700	139.235	Cargo A		34.981	27.353	34.482		A1	229
TC446485	Q66KU5_XENLA	RL36A_HUMAN	60S ribosomal protein L36a (60S ribosomal protein L44) (Cell growth-inhibiting gene 15 protein) (Cell migration-inducing gene 6 protein)	-1.21	1500	96	3800	19	270	14.0565	Cargo A		12.486	12.461	12.441		A1	10528
CL9778Contig1	Q08AX5_XENLA	RT16_HUMAN	28S ribosomal protein S16, mitochondrial (MRP-S16) (S16mt)				3000	19	210	11.4045	Cargo A		15.692	15.692	15.345	MT	A1	8735
CL4595Contig2	Q6GNA6_XENLA	SRP72_HUMAN	Signal recognition particle subunit SRP72 (SRP72) (Signal recognition particle 72 kDa protein)	-3	27	0	2700	19	190	10.3021	Cargo A		74.526	74.527	74.606		A1	5770
TC429155	Q6DJI0_XENLA	RS8_HUMAN	40S ribosomal protein S8	-0.98	5800	600	99000	18	7100	383.024	Cargo A		24.482	24.051	24.205		A1	7796
CL3415Contig2	Q498K6_XENLA	COPB_HUMAN	Coatomer subunit beta (Beta-coat protein) (Beta-COP)	-2.92	310	0.4	9300	18	2700	146.755	Cargo A		106.92	106.924	107.142		A1	4607
CL5086Contig1	EIF3D_XENLA	EIF3D_HUMAN	Eukaryotic translation initiation factor 3 subunit D (eIF3d) (Eukaryotic translation initiation factor 3 subunit 7) (eIF-3-zeta) (eIF3 p66)	-1.06	670	58	9100	18	650	36.9486	Cargo A		63.944	63.945	63.973		A1	6169
CL11808Contig1	F6R1M7_XENTR	NXP20_HUMAN	Protein NOXP20 (Nervous system overexpressed protein 20) (Protein FAM114A1)	-3	230	0	6500	18	470	26.0929	Cargo A		57.285	533.754	60.742		A1	850
CL14460Contig1	Q5PQ33_XENLA	RT11_HUMAN	28S ribosomal protein S11, mitochondrial (MRP-S11) (S11mt) (Cervical cancer proto-oncogene 2 protein) (HCC-2)				5000	18	360	20.4694	Cargo A		20.947	20.947	20.616	MT	A1	1608
CL4599Contig2	Q4V7K1_XENLA	IF4E2_HUMAN	Eukaryotic translation initiation factor 4E type 2 (eIF-4E type 2) (eIF4E type 2) (Eukaryotic translation initiation factor 4E homologous protein) (Eukaryotic translation initiation factor 4E-like 3) (eIF4E-like protein 4E-LP) (mRNA cap-binding protein 4EHP) (mRNA cap-binding protein type 3)	-3	13	0	2000	18	140	8.01132	Cargo A		24.611	24.611	28.362		A1	5774
CL381Contig8	NBP1A_XENLA	NCBP1_HUMAN	Nuclear cap-binding protein subunit 1 (80 kDa nuclear cap-binding protein) (CBP80) (NCBP 80 kDa subunit)	3	0	260	1600	18	120	6.46049	Cargo A		91.978	91.979	91.839		A1	5035
CL2140Contig1	CTR9_XENLA	CTR9_HUMAN	RNA polymerase-associated protein CTR9 homolog (SH2 domain-binding protein 1)	2.42	0.8	200	1300	18	95	5.16504	Cargo A		131.61	131.613	133.502		A1	3114
dsrrswapns_comp198573_c0_seq2	Q6GR01_XENLA	DECR2_HUMAN	Peroxisomal 2,4-dienoyl-CoA reductase (pDCR) (EC 1.3.1.34) (2,4-dienoyl-CoA reductase 2)	-1.09	800	65	18000	17	1300	78.8786	Cargo A		31.762	32.159	30.778		A1	6271
CL3712Contig1	LEO1_XENLA	LEO1_HUMAN	RNA polymerase-associated protein LEO1 (Replicative senescence down-regulated leo1-like protein)	3	0	190	1400	17	99	5.77464	Cargo A		81.061	80.407	75.404		A1	4932
CL3519Contig2	C124A_XENLA	CC124_HUMAN	Coiled-coil domain-containing protein 124	-3	240	0	1200	17	83	4.98161	Cargo A		25.259	25.26	25.835		A1	4706
CL1090Contig1	Q6IR57_XENLA	SC31B_HUMAN	Protein transport protein Sec31B (SEC31-like protein 2) (SEC31-related protein B) (SEC31B-1)	-3	160	0	830	17	59	3.44478	Cargo A		133.11	70.549	128.697		A1	524
CL1Contig247	IF2A_XENLA	IF2A_HUMAN	Eukaryotic translation initiation factor 2 subunit 1 (Eukaryotic translation initiation factor 2 subunit alpha) (eIF-2-alpha) (eIF-2A) (eIF-2alpha)	-0.8	1000	160	70000	16	5000	316.357	Cargo A		36.102	36.045	36.112		A1	2788
CL384Contig7	A2VDA5_XENLA	RL7A_HUMAN	60S ribosomal protein L7a (PLA-X polypeptide) (Surfeit locus protein 3)	-1.07	5300	450	67000	16	4800	301.277	Cargo A		29.613	29.841	29.996		A1	5059
CL2443Contig2	Q7T0U9_XENLA	COPD_HUMAN	Coatomer subunit delta (Archain) (Delta-coat protein) (Delta-COP)	-3	460	0	30000	16	4400	273.148	Cargo A		57.191	57.268	57.21		A1	3497
CL1Contig1706	Q6P7I2_XENLA	COPG1_HUMAN	Coatomer subunit gamma-1 (Gamma-1-coat protein) (Gamma-1-COP)	-2.58	390	1	4800	16	3100	193.814	Cargo A		97.85	97.756	97.718		A1	2762
CL4288Contig1	Q66L23_XENLA	RL24_HUMAN	60S ribosomal protein L24 (60S ribosomal protein L30)	-1.54	4500	130	38000	16	2700	171.138	Cargo A		17.676	16.012	17.779		A1	5522
CL316Contig6	Q7ZYJ8_XENLA	SEC13_HUMAN	Protein SEC13 homolog (SEC13-like protein 1) (SEC13-related protein)	-0.11	160	130	3800	16	270	16.8687	Cargo A		35.28	35.28	35.541		A1	4375
CL40804Contig1	Q7ZWP9_XENLA	HOME2_HUMAN	Homer protein homolog 2 (Homer-2) (Cupidin)	-3	29	0	1600	16	200	12.9687	Cargo A		43.706	35.947	40.627		A1	5331
zeinaSSns_comp389582_c0_seq2	DDX42_XENLA	DDX42_HUMAN	ATP-dependent RNA helicase DDX42 (EC 3.6.4.13) (DEAD box protein 42) (RNA helicase-like protein) (RHELP) (RNA helicase-related protein) (RNAHP) (SF3b DEAD box protein) (Splicing factor 3B-associated 125 kDa protein) (SF3b125)	3	0	230	750	16	54	3.40077	Cargo A		104.57	104.079	102.975		A1	11296
CL818Contig6	RL8_XENLA	RL8_HUMAN	60S ribosomal protein L8	-1.28	3600	190	89000	15	6400	434.423	Cargo A		27.917	27.918	28.025		A1	8030
CL2198Contig1	Q801P3_XENLA	COPZ1_HUMAN	Coatomer subunit zeta-1 (Zeta-1-coat protein) (Zeta-1 COP)	-0.84	910	130	89000	15	6300	419.128	Cargo A		20.188	21.167	20.198		A1	3184
CL134Contig2	Q4FZQ7_XENLA	RL35_HUMAN	60S ribosomal protein L35	-0.92	4100	490	82000	15	5800	394.915	Cargo A		14.278	14.45	14.551		A1	1369
CL1Contig1336	Q6AZV3_XENLA	RL17_HUMAN	60S ribosomal protein L17 (60S ribosomal protein L23) (PD-1)	-1.02	4600	440	48000	15	3400	231.463	Cargo A		21.396	21.396	21.397		A1	2680
zeinaSSns_comp384976_c6_seq4	Q7T0R9_XENLA	RS2_HUMAN	40S ribosomal protein S2 (40S ribosomal protein S4) (Protein LLRep3)	-2.3	4500	23	44000	15	3100	210.083	Cargo A		31.312	30.274	31.324		A1	10998
CL9341Contig1	Q5XGZ7_XENLA	SGT1_HUMAN	Protein SGT1 (hSGT1) (Protein ecdysoneless homolog) (Suppressor of GCR2)	-3	160	0	1300	15	730	48.2358	Cargo A		71.797	71.798	72.758		A1	8554
CL9Contig6	Q6AZJ0_XENLA	DHE3_HUMAN	Glutamate dehydrogenase 1, mitochondrial (GDH 1) (EC 1.4.1.3)				1600	15	690	46.9935	Cargo A		60.019	59.566	61.398	MT	A1	8841
CL6789Contig1	B2RYX8_XENTR	RT29_HUMAN	28S ribosomal protein S29, mitochondrial (MRP-S29) (S29mt) (Death-associated protein 3) (DAP-3) (Ionizing radiation resistance conferring protein)				1500	15	670	45.0627	Cargo A		48.921		45.566	MT	A1	7317
CL5635Contig1	B7ZPG0_XENLA	ZAR1_HUMAN	Zygote arrest protein 1 (Oocyte-specific maternal effect factor)	-3	16	0	8800	15	630	41.1948	Cargo A		35.502	33.963	45.873		A1	6571
CL1686Contig3	EIF3I_XENLA	EIF3I_HUMAN	Eukaryotic translation initiation factor 3 subunit I (eIF3i) (Eukaryotic translation initiation factor 3 subunit 2) (TGF-beta receptor-interacting protein 1) (TRIP-1) (eIF-3-beta) (eIF3 p36)	-3	820	0	6900	15	490	31.7807	Cargo A		36.469	36.496	36.502		A1	2079
CL1562Contig5	Q505M1_XENLA	CSDE1_HUMAN	Cold shock domain-containing protein E1 (N-ras upstream gene protein) (Protein UNR)	0.35	51	110	5800	15	360	23.8727	Cargo A		88.116	87.385	88.885		A1	1893
CL12859Contig1	Q6DEE0_XENLA	SNX9_HUMAN	Sorting nexin-9 (SH3 and PX domain-containing protein 1) (Protein SDP1) (SH3 and PX domain-containing protein 3A)	-3	96	0	4700	15	340	22.2084	Cargo A		66.623	65.769	66.592		A1	1179
CL4746Contig1	Q7T0T8_XENLA	ZO2_HUMAN	Tight junction protein ZO-2 (Tight junction protein 2) (Zona occludens protein 2) (Zonula occludens protein 2)	-0.64	30	6.9	1500	15	110	7.16859	Cargo A	NESdbO	49.175	49.175	133.958		A1	5891
CL4099Contig2	Q0IH85_XENLA	RUVB2_HUMAN	RuvB-like 2 (EC 3.6.4.12) (48 kDa TATA box-binding protein-interacting protein) (48 kDa TBP-interacting protein) (51 kDa erythrocyte cytosolic protein) (ECP-51) (INO80 complex subunit J) (Repressing pontin 52) (Reptin 52) (TIP49b) (TIP60-associated protein 54-beta) (TAP54-beta)	0.38	790	1900	530	14	9300	653.569	Cargo A		51.185	51.186	51.157		A1	5355
CL6407Contig1	RS3AA_XENLA	RS3A_HUMAN	40S ribosomal protein S3a (v-fos transformation effector protein) (Fte-1)	-1.4	5800	230	5500	14	8700	601.622	Cargo A		31.161	29.941	29.945		A1	7087
CL4312Contig2	Q66KX3_XENLA	RL23A_HUMAN	60S ribosomal protein L23a	-1.31	7300	360	3300	14	5800	424.796	Cargo A		17.674	17.674	17.695		A1	5550
CL1548Contig2	Q8AVX2_XENLA	RL5_HUMAN	60S ribosomal protein L5	-0.95	4700	530	72000	14	5200	358.459	Cargo A	NESdbO	34.111	34.111	34.363		A1	1844
CL1998Contig3	Q91855_XENLA	ERF3A_HUMAN	Eukaryotic peptide chain release factor GTP-binding subunit ERF3A (Eukaryotic peptide chain release factor subunit 3a) (eRF3a)	-2.24	210	1.2	970	14	2000	139.658	Cargo A		63.481	67.919	68.883		A1	2641
CL323Contig1	Q6NTK6_XENLA	PWP1_HUMAN	Periodic tryptophan protein 1 homolog (Keratinocyte protein IEF SSP 9502)	0.18	180	270	10000	14	730	54.1361	Cargo A		58.655	56.166	55.828		A1	4425
dsrrswapns_comp193759_c0_seq2	RL36_XENLA	RL36_HUMAN	60S ribosomal protein L36	-1.4	4900	190	4100	14	300	21.6937	Cargo A		12.326	12.326	12.254		A1	9050
CL19149Contig1		ELP5_HUMAN	Elongator complex protein 5 (Dermal papilla-derived protein 6) (S-phase 2 protein)	-3	49	0	1600	14	110	7.9967	Cargo A		31.742		34.841		A1	2498
zeinaSSns_comp389497_c1_seq2	GAPD1_XENLA	GAPD1_HUMAN	GTPase-activating protein and VPS9 domain-containing protein 1 (GAPex-5) (Rab5-activating protein 6)	-3	18	0	1100	14	79	5.86698	Cargo A		161.88	162.63	164.98		A1	11288
CL2440Contig2	Q6GR29_XENLA	RUVB1_HUMAN	RuvB-like 1 (EC 3.6.4.12) (49 kDa TATA box-binding protein-interacting protein) (49 kDa TBP-interacting protein) (54 kDa erythrocyte cytosolic protein) (ECP-54) (INO80 complex subunit H) (Nuclear matrix protein 238) (NMP 238) (Pontin 52) (TIP49a) (TIP60-associated protein 54-alpha) (TAP54-alpha)	0.34	920	2000	1200	13	9400	736.865	Cargo A		50.336	50.389	50.228		A1	3489
CL5790Contig2	Q6NTT2_XENLA	RS18_HUMAN	40S ribosomal protein S18 (Ke-3) (Ke3)	-1.45	5900	210	97000	13	6900	538.541	Cargo A		18.201	17.677	17.719		A1	6683
CL50Contig6	Q7SZ77_XENLA	RS11_HUMAN	40S ribosomal protein S11	-0.83	3500	520	2300	13	6700	524.705	Cargo A		18.42	18.421	18.431		A1	6183
CL1Contig796	Q7ZXK4_XENLA	RL10_HUMAN	60S ribosomal protein L10 (Laminin receptor homolog) (Protein QM) (Tumor suppressor QM)	-1.8	4500	71	6100	13	4100	318.334	Cargo A		24.582	24.541	24.604		A1	2869
TC426340	Q7ZWY6_XENLA	RL9_HUMAN	60S ribosomal protein L9	-1.29	3400	180	51000	13	3600	279.044	Cargo A		26.203	21.899	21.863		A1	10468
dsrrswapns_comp210574_c2_seq8	Q7ZYR1_XENLA	RL3_HUMAN	60S ribosomal protein L3 (HIV-1 TAR RNA-binding protein B) (TARBP-B)	-1.02	2800	270	48000	13	3400	263.026	Cargo A		48.302	46.041	46.109		A1	9275
CL488Contig2	Q6DJD1_XENLA	COPA_HUMAN	Coatomer subunit alpha (Alpha-coat protein) (Alpha-COP) (HEP-COP) (HEPCOP) [Cleaved into: Xenin (Xenopsin-related peptide); Proxenin]	-3	280	0	6600	13	1800	142.669	Cargo A		138.59	138.578	138.346		A1	6001
CL6842Contig2	Q6NRY1_XENLA	HABP4_HUMAN	Intracellular hyaluronan-binding protein 4 (IHABP-4) (IHABP4) (Ki-1/57 intracellular antigen)	-1.67	2400	51	2800	13	1300	103.135	Cargo A		43.03	42.733	45.785		A1	7344
CL1Contig1495	EIF3L_XENLA	EIF3L_HUMAN	Eukaryotic translation initiation factor 3 subunit L (eIF3l) (Eukaryotic translation initiation factor 3 subunit 6-interacting protein) (Eukaryotic translation initiation factor 3 subunit E-interacting protein)	-2.97	900	1	1800	13	860	67.4961	Cargo A		66.492	66.523	66.727		A1	2725
CL8531Contig1	MB12A_XENLA	MB12A_HUMAN	Multivesicular body subunit 12A (CIN85/CD2AP family-binding protein) (ESCRT-I complex subunit MVB12A) (Protein FAM125A)	-3	16	0	1700	13	120	9.11353	Cargo A		29.897	29.897	28.783		A1	8184
CL7872Contig1	ELP6_XENLA	ELP6_HUMAN	Elongator complex protein 6 (Angiotonin-transactivated protein 1) (Protein TMEM103)	-3	18	0	1000	13	72	5.489	Cargo A		29.029	29.029	29.793		A1	7875
CL5827Contig1	Q6AZL9_XENLA	RS23_HUMAN	40S ribosomal protein S23	-1.19	6100	400	4600	12	6100	501.772	Cargo A		17.239	15.768	15.808		A1	6715
CL397Contig6	RS4_XENLA	RS4X_HUMAN	40S ribosomal protein S4, X isoform (SCR10) (Single copy abundant mRNA protein)	-1.27	4400	240	2700	12	6000	512.212	Cargo A		32.931	29.665	29.598		A1	5219
CL3171Contig2	Q3B8I3_XENLA	RL7_HUMAN	60S ribosomal protein L7	-1.26	5900	330	51000	12	3700	318.005	Cargo A		28.729	28.729	29.226		A1	4378
CL1759Contig3	B7ZPG6_XENLA	RS10_HUMAN	40S ribosomal protein S10	-1.64	3500	80	44000	12	3100	268.387	Cargo A		21.106	18.883	18.898		A1	2216
CL7134Contig1	Q76FS4_XENLA	DRG2_HUMAN	Developmentally-regulated GTP-binding protein 2 (DRG-2)	-3	400	0.2	34000	12	2400	200.751	Cargo A		40.907	40.908	40.746		A1	7528
CL1582Contig6	Q7ZY48_XENLA	RL13A_HUMAN	60S ribosomal protein L13a (23 kDa highly basic protein)	-0.95	2100	240	1300	12	2300	194.664	Cargo A		26.562	26.435	23.577		A1	1932
CL555Contig6	RL19_XENLA	RL19_HUMAN	60S ribosomal protein L19	-0.66	4000	890	32000	12	2300	181.759	Cargo A		23.481	23.481	23.466		A1	6534
CL2665Contig2	EI3EA_XENLA	EIF3E_HUMAN	Eukaryotic translation initiation factor 3 subunit E (eIF3e) (Eukaryotic translation initiation factor 3 subunit 6) (Viral integration site protein INT-6 homolog) (eIF-3 p48)	-2.36	670	2.9	8900	12	640	51.8491	Cargo A		51.315	52.227	52.221		A1	3829
CL18415Contig1	Q6AXA1_XENLA	FA98A_HUMAN	Protein FAM98A	0.54	170	580	8400	12	600	51.4548	Cargo A		42.757	42.758	55.401		A1	2354
BE189994	F7D600_XENTR	RT10_HUMAN	28S ribosomal protein S10, mitochondrial (MRP-S10) (S10mt)				6500	12	460	38.1086	Cargo A		17.3	60.249	22.999		A1	16
CL9229Contig1	PIHD1_XENLA	PIHD1_HUMAN	PIH1 domain-containing protein 1 (Nucleolar protein 17 homolog)	-3	59	0	3700	12	260	21.6969	Cargo A		33.656	33.656	32.363		A1	8498
TC449839	NPM_XENLA	NPM_HUMAN	Nucleophosmin (NPM) (Nucleolar phosphoprotein B23) (Nucleolar protein NO38) (Numatrin)	2.46	8.1	2300	2800	12	200	17.3211	Cargo A	NESdbO, BioGrid	30.155	33.532	32.575		A1	10591
CL9519Contig1	GPN2_XENLA	GPN2_HUMAN	GPN-loop GTPase 2 (ATP-binding domain 1 family member B)	-1.12	110	8.6	2400	12	170	14.2226	Cargo A		36.823	35.346	34.561		A1	8622
CL2846Contig1	F6Z9E5_XENTR	USP9X_HUMAN	Probable ubiquitin carboxyl-terminal hydrolase FAF-X (EC 3.4.19.12) (Deubiquitinating enzyme FAF-X) (Fat facets in mammals) (hFAM) (Fat facets protein-related, X-linked) (Ubiquitin thioesterase FAF-X) (Ubiquitin-specific protease 9, X chromosome) (Ubiquitin-specific-processing protease FAF-X)	-3	39	0	1400	12	100	8.62067	Cargo A		289.77	153.261	292.28		A1	4043
CL11072Contig1	ELP3_XENLA	ELP3_HUMAN	Elongator complex protein 3 (hELP3) (EC 2.3.1.48)	-3	56	0	1400	12	100	8.38914	Cargo A		62.576	141.91	62.259		A1	572
dsrrswapns_comp206429_c5_seq1	Q6INS4_XENLA	SRPK1_HUMAN	SRSF protein kinase 1 (EC 2.7.11.1) (SFRS protein kinase 1) (Serine/arginine-rich protein-specific kinase 1) (SR-protein-specific kinase 1)	-1.05	170	15	1200	12	83	7.1241	Cargo A		69.825	68.651	74.325		A1	2243
CL2063Contig3	B4F6U8_XENTR	IF4G3_HUMAN	Eukaryotic translation initiation factor 4 gamma 3 (eIF-4-gamma 3) (eIF-4G 3) (eIF4G 3) (eIF-4-gamma II) (eIF4GII)	-3	57	0	870	12	62	5.10808	Cargo A		149.5	77.982	176.652		A1	2985
CL289Contig7	Q6PI76_XENLA	RS14_HUMAN	40S ribosomal protein S14	-1.37	8400	360	6500	11	11000	1006.44	Cargo A		16.273	16.273	16.273		A1	4093
zeinaSSns_comp370555_c0_seq1	Q7SZB3_XENLA	RL21_HUMAN	60S ribosomal protein L21	-0.99	3200	330	28000	11	2000	178.103	Cargo A		18.692	18.692	18.565		A1	10875
CL1Contig276	Q66KV6_XENLA	RL28_HUMAN	60S ribosomal protein L28	-1.37	3700	160	25000	11	1800	167.111	Cargo A		15.55	15.55	15.748		A1	2793
CL22Contig18	Q66KW5_XENLA	RL32_HUMAN	60S ribosomal protein L32	-1.2	3900	250	23000	11	1600	142.007	Cargo A		15.78	15.822	15.86		A1	3327
CL225Contig3	Q6NUG3_XENLA	EI2BA_HUMAN	Translation initiation factor eIF-2B subunit alpha (eIF-2B GDP-GTP exchange factor subunit alpha)	-0.74	250	46	13000	11	910	80.1855	Cargo A		33.576	33.576	33.712		A1	3268
CL2367Contig3	Q6PA46_XENLA	RPB2_HUMAN	DNA-directed RNA polymerase II subunit RPB2 (EC 2.7.7.6) (DNA-directed RNA polymerase II 140 kDa polypeptide) (DNA-directed RNA polymerase II subunit B) (RNA polymerase II subunit 2) (RNA polymerase II subunit B2)	0.09	92	110	1500	11	380	35.0275	Cargo A		133.9	108.541	133.897		A1	3411
CL4693Contig1	Q3KQ86_XENLA	GPN1_HUMAN	GPN-loop GTPase 1 (EC 3.6.5.-) (MBD2-interacting protein) (MBDin) (RNAPII-associated protein 4) (XPA-binding protein 1)	-1.02	120	12	4600	11	330	30.7897	Cargo A	NESdbO	40.884	40.884	41.74		A1	5857
CL7592Contig1	Q6GP23_XENLA	EFHD1_HUMAN	EF-hand domain-containing protein D1 (EF-hand domain-containing protein 1) (Swiprosin-2)	-1.2	84	5.3	3400	11	240	21.7906	Cargo A		26.416	26.417	26.928		A1	7730
dsrrswapns_comp213855_c1_seq2	A6H8I5_XENLA	SRP68_HUMAN	Signal recognition particle subunit SRP68 (SRP68) (Signal recognition particle 68 kDa protein)	-3	14	0	2200	11	160	14.5568	Cargo A		68.727	68.737	70.73		A1	9483
dsrrswapns_comp206309_c0_seq6	Q5XHA6_XENLA	SRP19_HUMAN	Signal recognition particle 19 kDa protein (SRP19)	-3	10	0	1900	11	140	12.1246	Cargo A		15.979	15.98	16.156		A1	9128
zeinaSSns_comp243682_c0_seq1				-3	17	0	940	11	67	6.08929	Cargo A		5.556				A1	10847
CL246Contig9	Q90W60_XENLA	NOP56_HUMAN	Nucleolar protein 56 (Nucleolar protein 5A)	3	0.2	1100	800	11	57	4.97671	Cargo A		59.725	59.726	66.05		A1	3528
CL11851Contig1	Q6IRR3_XENLA	RPB3_HUMAN	DNA-directed RNA polymerase II subunit RPB3 (RNA polymerase II subunit 3) (RNA polymerase II subunit B3) (DNA-directed RNA polymerase II 33 kDa polypeptide) (RPB33) (DNA-directed RNA polymerase II subunit C) (RPB31)	0.13	190	260	9000	10	640	63.3884	Cargo A		31.335	72.872	31.441		A1	865
CL1Contig1309	NMD3_XENLA	NMD3_HUMAN	60S ribosomal export protein NMD3 (hNMD3)	0.07	9.1	11	1100	10	79	7.65218	Cargo A	NESdbO, BioGrid	58.097	58.098	57.603		A1	2701
CL500Contig9	TB1RA_XENLA	TBL1R_HUMAN	F-box-like/WD repeat-containing protein TBL1XR1 (Nuclear receptor corepressor/HDAC3 complex subunit TBLR1) (TBL1-related protein 1) (Transducin beta-like 1X-related protein 1)	1.76	5.3	310	780	10	56	5.46622	Cargo A		56.071	56.043	55.595		A1	6112
dsrrswapns_comp217958_c1_seq1	K9J8C5_XENTR	UBR4_HUMAN	E3 ubiquitin-protein ligase UBR4 (EC 6.3.2.-) (600 kDa retinoblastoma protein-associated factor) (N-recognin-4) (Retinoblastoma-associated factor of 600 kDa) (RBAF600) (p600) (Zinc finger UBR1-type protein 1)				1200	9.9	83	8.39807	Cargo A		571.49		573.841	TM	A1	9899
CL1631Contig2	Q8QFW7_XENLA	RL34_HUMAN	60S ribosomal protein L34	-0.75	1900	340	16000	9.8	1200	120.328	Cargo A		13.292	13.292	13.293		A1	2002
CL3514Contig2	Q05AW6_XENLA	RTCB_HUMAN	tRNA-splicing ligase RtcB homolog (EC 6.5.1.3)	0.09	450	550	14000	9.8	1000	102.274	Cargo A		55.186	55.187	55.21		A1	4697
CL15507Contig1	MACD2_XENLA	MACD2_HUMAN	O-acetyl-ADP-ribose deacetylase MACROD2 (EC 3.2.2.-) (EC 3.5.1.-) (MACRO domain-containing protein 2) ([Protein ADP-ribosylglutamate] hydrolase)	-0.05	170	150	530	9.6	2200	232.448	Cargo A		53.135	46.354	50.05		A1	1852
CL1438Contig2	EI3GA_XENLA	EIF3G_HUMAN	Eukaryotic translation initiation factor 3 subunit G (eIF3g) (Eukaryotic translation initiation factor 3 RNA-binding subunit) (eIF-3 RNA-binding subunit) (Eukaryotic translation initiation factor 3 subunit 4) (eIF-3-delta) (eIF3 p42) (eIF3 p44)	-2.37	750	3.2	8800	9.6	630	65.6613	Cargo A		36.712	34.365	35.611		A1	1597
CL11Contig22	A2VDE2_XENLA	IF4B_HUMAN	Eukaryotic translation initiation factor 4B (eIF-4B)	-2.07	100	0.9	540	9.5	100	10.5954	Cargo A		64.295	76.128	69.151		A1	928
CL1Contig1331	Q6DJJ1_XENLA	RS25_HUMAN	40S ribosomal protein S25	-1.19	3800	240	49000	9.4	3500	370.479	Cargo A		22.171	13.829	13.742		A1	2705
zeinaSSns_comp388669_c0_seq11	Q6GPR8_XENLA	DYL1_HUMAN	Dynein light chain 1, cytoplasmic (8 kDa dynein light chain) (DLC8) (Dynein light chain LC8-type 1) (Protein inhibitor of neuronal nitric oxide synthase) (PIN)	-0.29	660	340	2600	9.4	190	19.8111	Cargo A		10.358	10.358	10.366		A1	11200
TC433567	Q7ZYU4_XENLA	RS9_HUMAN	40S ribosomal protein S9	-0.59	5400	1400	86000	9.2	6200	670.241	Cargo A		22.577	22.577	22.591		A1	10534
CL929Contig2	Q66KV2_XENLA	RL38_HUMAN	60S ribosomal protein L38	-1.69	3200	66	2700	9.2	190	20.8033	Cargo A		9.6985	8.206	8.218		A1	8531
CL3036Contig4	F6VJ53_XENTR	TOE1_HUMAN	Target of EGR1 protein 1	3	0	310	1200	9.1	84	9.25702	Cargo A		58.304		56.548		A1	4245
CL1Contig546	Q6DJF7_XENLA	RL6_HUMAN	60S ribosomal protein L6 (Neoplasm-related protein C140) (Tax-responsive enhancer element-binding protein 107) (TaxREB107)	-1.21	4300	270	31000	9	2200	246.195	Cargo A		29.673	29.67	32.728		A1	2839
TC427650	Q6PHL6_XENLA	RS19_HUMAN	40S ribosomal protein S19	-1.59	4600	120	40000	8.8	2900	325.306	Cargo A		17.108	16.05	16.06		A1	2704
CL2590Contig2	Q6NRI6_XENLA	RPAP1_HUMAN	RNA polymerase II-associated protein 1	-1.42	89	3.4	1500	8.8	110	12.4916	Cargo A		158.35	158.229	152.755		A1	3730
CL5802Contig1	CN166_XENLA	CN166_HUMAN	UPF0568 protein C14orf166 (CLE7 homolog) (CLE)	0.23	210	370	4000	8.7	1100	131.021	Cargo A		27.62	27.621	28.068		A1	6701
CL3624Contig1	B3DLU6_XENTR	TSC2_HUMAN	Tuberin (Tuberous sclerosis 2 protein)	-3	30	0	920	8.7	66	7.60861	Cargo A		195.25	101.056	200.608		A1	4827
dsrrswapns_comp216794_c1_seq4	F6SGP2_XENTR	GYS1_HUMAN	Glycogen [starch] synthase, muscle (EC 2.4.1.11)	-3	380	0.2	830	8.6	60	6.91214	Cargo A		84.209	80.83	83.786		A1	9746
dsrrswapns_comp211046_c0_seq2	Q6DJN5_XENLA	RL13_HUMAN	60S ribosomal protein L13 (Breast basic conserved protein 1)	-1.22	3900	230	49000	8.5	3500	408.498	Cargo A		24.198	24.198	24.261		A1	9302
CL391Contig4	Q7SZB7_XENLA	RL18A_HUMAN	60S ribosomal protein L18a	-0.73	2900	540	28000	8.5	2000	238.971	Cargo A		20.652	20.652	20.762		A1	5140
CL9411Contig1	Q5EAW7_XENLA	OSCP1_HUMAN	Protein OSCP1 (hOSCP1) (Organic solute transport protein 1) (Oxidored-nitro domain-containing protein 1)	-3	45	0	1300	8.5	94	10.9647	Cargo A		43.367	43.368	44.586		A1	8587
CL1Contig728	RS13_XENLA	RS13_HUMAN	40S ribosomal protein S13	-1.23	4700	280	83000	8.4	5900	700.638	Cargo A		17.25	17.25	17.222		A1	2858
CL1469Contig3	F7CA14_XENTR	NFS1_HUMAN	Cysteine desulfurase, mitochondrial (EC 2.8.1.7)				5500	8.3	390	47.2183	Cargo A		49.469	46.263	50.196	MT	A1	1653
CL12387Contig1	Q5U5A5_XENLA	LSM4_HUMAN	U6 snRNA-associated Sm-like protein LSm4 (Glycine-rich protein) (GRP)	0.41	430	1100	2600	8.2	190	22.7633	Cargo A		15.887	127.63	15.35		A1	1042
CL2355Contig2	EIF3C_XENLA	EIFCL_HUMAN	Eukaryotic translation initiation factor 3 subunit C-like protein	-3	610	0	5900	8.1	420	52.0812	Cargo A		103.56	107.004	105.473		A1	3398
CL2652Contig3	PP4C_XENLA	PP4C_HUMAN	Serine/threonine-protein phosphatase 4 catalytic subunit (PP4C) (Pp4) (EC 3.1.3.16) (Protein phosphatase X) (PP-X)	0.37	120	280	5200	8	1400	177.946	Cargo A		35.123	35.123	35.08		A1	3812
CL115Contig6	ERF1_XENLA	ERF1_HUMAN	Eukaryotic peptide chain release factor subunit 1 (Eukaryotic release factor 1) (eRF1) (Protein Cl1) (TB3-1)	-1.84	330	4.8	19000	8	1400	172.415	Cargo A		49.01	234.331	49.031		A1	771
TC434386	RS7_XENLA	RS7_HUMAN	40S ribosomal protein S7	-0.7	5600	1100	2300	7.9	6200	785.136	Cargo A		22.695	22.184	22.127		A1	9631
CL1958Contig2	EIF3B_XENLA	EIF3B_HUMAN	Eukaryotic translation initiation factor 3 subunit B (eIF3b) (Eukaryotic translation initiation factor 3 subunit 9) (Prt1 homolog) (hPrt1) (eIF-3-eta) (eIF3 p110) (eIF3 p116)	-1.72	830	16	750	7.8	640	82.83	Cargo A		80.001	80.256	92.482		A1	2581
CL92Contig8	RS31_XENLA	RS3_HUMAN	40S ribosomal protein S3 (EC 4.2.99.18)	-1.78	5900	99	1300	7.7	11000	1383.88	Cargo A		27.129	27.002	26.688		A1	8536
dsrrswapns_comp206967_c7_seq2	Q6NTR4_XENLA	RL14_HUMAN	60S ribosomal protein L14 (CAG-ISL 7)	-1.15	3100	220	4800	7.6	3300	436.726	Cargo A		16.137	16.107	23.432		A1	7231
CL8831Contig2	A5D8N1_XENLA	LSM1_HUMAN	U6 snRNA-associated Sm-like protein LSm1 (Cancer-associated Sm-like) (Small nuclear ribonuclear CaSm)	-0.82	390	60	16000	7.4	1100	151.554	Cargo A		15.205	15.205	15.179		A1	8314
CL46Contig9	Q7ZY09_XENLA	RS12_HUMAN	40S ribosomal protein S12	-1.31	4500	220	12000	7.4	840	113.22	Cargo A		14.515	14.515	14.515		A1	5864
CL628Contig5	EIF3H_XENLA	EIF3H_HUMAN	Eukaryotic translation initiation factor 3 subunit H (eIF3h) (Eukaryotic translation initiation factor 3 subunit 3) (eIF-3-gamma) (eIF3 p40 subunit)	-2	820	8.2	8100	7.4	580	78.1499	Cargo A		38.463	38.391	39.93		A1	7001
CL561Contig1	Q8AVW0_XENLA	RL12_HUMAN	60S ribosomal protein L12	-0.9	2900	370	77000	7.3	5500	759.081	Cargo A		17.766	17.794	17.819		A1	6563
CL5530Contig2	EIF3M_XENLA	EIF3M_HUMAN	Eukaryotic translation initiation factor 3 subunit M (eIF3m) (Fetal lung protein B5) (hFL-B5) (PCI domain-containing protein 1)	-2.33	420	1.9	4400	7.3	310	42.7597	Cargo A		42.324	42.306	42.503		A1	6512
CL2270Contig3	Q28FS0_XENTR	EIF3F_HUMAN	Eukaryotic translation initiation factor 3 subunit F (eIF3f) (Deubiquitinating enzyme eIF3f) (EC 3.4.19.12) (Eukaryotic translation initiation factor 3 subunit 5) (eIF-3-epsilon) (eIF3 p47)	-2.39	890	3.6	3600	7.3	260	35.6921	Cargo A		31.156	35.287	37.564		A1	3288
CL384Contig8	Q66KY6_XENLA	RL11_HUMAN	60S ribosomal protein L11 (CLL-associated antigen KW-12)	-1	3300	330	1900	7.1	5800	813.748	Cargo A		20.177	20.177	20.252		A1	5057
CL926Contig3	Q7SZA8_XENLA	RL18_HUMAN	60S ribosomal protein L18	-0.74	3900	710	18000	7.1	1300	179.386	Cargo A		21.623	21.624	21.634		A1	8514
CL2008Contig1	WDR61_XENLA	WDR61_HUMAN	WD repeat-containing protein 61 (Meiotic recombination REC14 protein homolog) (SKI8 homolog) (Ski8) [Cleaved into: WD repeat-containing protein 61, N-terminally processed]	0.23	310	520	4400	7.1	320	44.2576	Cargo A		33.334	33.334	33.581		A1	2906
CL2962Contig3	Q3KQC9_XENLA	RS16_HUMAN	40S ribosomal protein S16	-1.15	6300	440	4600	6.8	5800	841.356	Cargo A		16.573	16.33	16.445		A1	4158
CL11534Contig1	F7C781_XENTR	THUM3_HUMAN	THUMP domain-containing protein 3	-3	370	0	860	6.8	1300	197.534	Cargo A		59.871	77.089	57.003		A1	754
TC440338	Q6PHL5_XENLA	RL27_HUMAN	60S ribosomal protein L27	-1.01	6100	600	74000	6.7	5300	780.547	Cargo A		15.827	15.827	15.798		A1	10585
CL522Contig9	Q5MNU4_XENLA	STAU1_HUMAN	Double-stranded RNA-binding protein Staufen homolog 1	-1.61	52	1.3	540	6.7	110	15.9186	Cargo A	BioGrid	74.729	78.847	63.182		A1	6286
CL560Contig6	RL10A_XENLA	RL10A_HUMAN	60S ribosomal protein L10a (CSA-19) (Neural precursor cell expressed developmentally down-regulated protein 6) (NEDD-6)	-1.01	4300	420	11000	6.6	4100	627.377	Cargo A		24.775	24.775	24.831		A1	6559
CL1Contig372	Q6GNF4_XENLA	RS17_HUMAN	40S ribosomal protein S17	-1.01	4900	490	50000	6.5	3500	545.005	Cargo A		15.652	15.524	15.55		A1	2814
CL763Contig5	F6X369_XENTR	UBE2O_HUMAN	E2/E3 hybrid ubiquitin-protein ligase UBE2O (EC 6.3.2.-) (EC 6.3.2.19) (Ubiquitin carrier protein O) (Ubiquitin-conjugating enzyme E2 O) (Ubiquitin-conjugating enzyme E2 of 230 kDa) (Ubiquitin-conjugating enzyme E2-230K) (Ubiquitin-protein ligase O)	-1.29	320	16	11000	6.3	810	126.941	Cargo A		143.58	35.11	141.293		A1	7763
CL6352Contig1	RL22_XENLA	RL22_HUMAN	60S ribosomal protein L22 (EBER-associated protein) (EAP) (Epstein-Barr virus small RNA-associated protein) (Heparin-binding protein HBp15)	-0.51	3700	1200	89000	6.2	6400	1024.65	Cargo A		15.142	14.816	14.787		A1	7051
zeinaSSns_comp365834_c1_seq5	Q0IHT8_XENTR	NP1L4_HUMAN	Nucleosome assembly protein 1-like 4 (Nucleosome assembly protein 2) (NAP-2)	-0.99	730	75	52000	6.2	3700	598.255	Cargo A		41.781	45.516	42.823		A1	4824
CL10318Contig1	Q6GNH1_XENLA	RL23_HUMAN	60S ribosomal protein L23 (60S ribosomal protein L17)	-0.59	3500	890	17000	6	1200	203.045	Cargo A		17.523	168.028	14.865		A1	306
CL3462Contig1	Q640K5_XENLA	PDCD4_HUMAN	Programmed cell death protein 4 (Neoplastic transformation inhibitor protein) (Nuclear antigen H731-like) (Protein 197/15a)	-0.97	650	69	3300	6	230	38.8825	Cargo A		50.674	50.674	51.735		A1	4649
CL13Contig30	EIF3A_XENLA	EIF3A_HUMAN	Eukaryotic translation initiation factor 3 subunit A (eIF3a) (Eukaryotic translation initiation factor 3 subunit 10) (eIF-3-theta) (eIF3 p167) (eIF3 p180) (eIF3 p185)	-2.64	560	1.3	3300	6	230	38.8011	Cargo A		168.5	168.5	166.569		A1	1514
CL581Contig3	Q6PA38_XENLA	RPAB1_HUMAN	DNA-directed RNA polymerases I, II, and III subunit RPABC1 (RNA polymerases I, II, and III subunit ABC1) (DNA-directed RNA polymerase II 23 kDa polypeptide) (DNA-directed RNA polymerase II subunit E) (RPB5 homolog) (XAP4)	1.18	57	880	3100	6	220	37.0873	Cargo A		24.588	24.588	24.551		A1	6712
zeinaSSns_comp389333_c5_seq4	RL37A_XENLA	RL37A_HUMAN	60S ribosomal protein L37a	-1.57	3300	89	1500	5.9	110	18.4689	Cargo A		10.259	10.243	10.275		A1	10741
CL4390Contig1	NCBP2_XENLA	NCBP2_HUMAN	Nuclear cap-binding protein subunit 2 (20 kDa nuclear cap-binding protein) (Cell proliferation-inducing gene 55 protein) (NCBP 20 kDa subunit) (CBP20) (NCBP-interacting protein 1) (NIP1)	2.42	1.1	280	1400	5.9	100	17.3697	Cargo A		17.564	17.565	18.001		A1	5602
zeinaSSns_comp385083_c0_seq3	Q6DFK7_XENLA	G3BP2_HUMAN	Ras GTPase-activating protein-binding protein 2 (G3BP-2) (GAP SH3 domain-binding protein 2)	-2.17	330	2.3	1100	5.8	77	13.2503	Cargo A		54.362	54.363	54.121		A1	11001
CL92Contig5	RL4A_XENLA	RL4_HUMAN	60S ribosomal protein L4 (60S ribosomal protein L1)	-1.05	4700	420	61000	5.7	4400	767.163	Cargo A		44.908	44.909	47.697		A1	8534
CL1634Contig3	Q6GNV0_XENLA	PA2G4_HUMAN	Proliferation-associated protein 2G4 (Cell cycle protein p38-2G4 homolog) (hG4-1) (ErbB3-binding protein 1)	-1.91	4200	52	5200	5.7	2700	478.2	Cargo A		43.426	43.471	43.787		A1	2010
CL964Contig2	Q8AVP6_XENLA	GBLP_HUMAN	Guanine nucleotide-binding protein subunit beta-2-like 1 (Cell proliferation-inducing gene 21 protein) (Guanine nucleotide-binding protein subunit beta-like protein 12.3) (Human lung cancer oncogene 7 protein) (HLC-7) (Receptor for activated C kinase) (Receptor of activated protein kinase C 1) (RACK1) [Cleaved into: Guanine nucleotide-binding protein subunit beta-2-like 1, N-terminally processed]	-1.7	4800	97	5300	5.6	6900	1231.12	Cargo A		36.257	35.069	35.077		A1	8673
zeinaSSns_comp386515_c0_seq2	Q7ZY44_XENLA	ILF2_HUMAN	Interleukin enhancer-binding factor 2 (Nuclear factor of activated T-cells 45 kDa)	1.85	18	1300	1800	5.6	130	22.5219	Cargo A		42.842	42.846	43.062		A1	11055
CL13826Contig1	Q5U556_XENLA	RM12_HUMAN	39S ribosomal protein L12, mitochondrial (L12mt) (MRP-L12) (5c5-2)				710	5.6	50	9.02637	Cargo A		20.815	20.815	21.348	MT	A1	1459
CL2410Contig2	Q7SYU3_XENLA	RS5_HUMAN	40S ribosomal protein S5 [Cleaved into: 40S ribosomal protein S5, N-terminally processed]	-1.22	5700	340	84000	5.4	6000	1103.13	Cargo A		22.759	22.759	22.876		A1	3464
CL2830Contig1	RL31_XENLA	RL31_HUMAN	60S ribosomal protein L31	-0.61	5100	1300	34000	5.4	2500	456.199	Cargo A		14.516	14.516	14.463		A1	4025
CL575Contig2	Q7SZC0_XENLA	RL30_HUMAN	60S ribosomal protein L30	-1.5	5100	160	16000	5.3	1100	211.287	Cargo A		13.74	12.938	12.784		A1	6658
CL168Contig5	CDV3A_XENLA	CDV3_HUMAN	Protein CDV3 homolog	-1.39	910	37	10000	5.3	740	139.635	Cargo A		26.505	26.505	27.335		A1	2088
CL7085Contig2	Q7SY62_XENLA	SNX2_HUMAN	Sorting nexin-2 (Transformation-related gene 9 protein) (TRG-9)	-3	78	0	860	5.3	130	25.0962	Cargo A		60.226	58.435	58.471		A1	7495
CL6589Contig1	VITA2_XENLA	APOB_HUMAN	Apolipoprotein B-100 (Apo B-100) [Cleaved into: Apolipoprotein B-48 (Apo B-48)]				1200	5.2	320	61.2683	Cargo A		201.41	201.545	515.605	ER	A1	7205
dsrrswapns_comp215012_c0_seq2	Q6NS22_XENLA	HNRPQ_HUMAN	Heterogeneous nuclear ribonucleoprotein Q (hnRNP Q) (Glycine- and tyrosine-rich RNA-binding protein) (GRY-RBP) (NS1-associated protein 1) (Synaptotagmin-binding, cytoplasmic RNA-interacting protein)	1.63	14	600	800	5.2	58	11.108	Cargo A		69.281	69.308	69.603		A1	9575
CL5362Contig1	Q7ZY49_XENLA	SYSC_HUMAN	Serine--tRNA ligase, cytoplasmic (EC 6.1.1.11) (Seryl-tRNA synthetase) (SerRS) (Seryl-tRNA(Ser/Sec) synthetase)	-2.71	1300	2.6	4300	5.1	5400	1052.47	Cargo A		58.318	58.347	58.777		A1	6381
CL48Contig2	RS27_XENLA	RS27_HUMAN	40S ribosomal protein S27 (Metallopan-stimulin 1) (MPS-1)	-1.77	4200	72	22000	5.1	1600	317.225	Cargo A		9.4751	9.475	9.461		A1	6012
CL2318Contig2	Q7ZWZ7_XENLA	RL15_HUMAN	60S ribosomal protein L15	-1.07	4100	350	15000	5.1	1100	212.449	Cargo A		24.044	24.062	24.146		A1	3350
CL1525Contig1	Q7SZB0_XENLA	RL35A_HUMAN	60S ribosomal protein L35a (Cell growth-inhibiting gene 33 protein)	-1.12	3700	280	7700	5	550	109.111	Cargo A		12.548	12.549	12.538		A1	1798
CL4435Contig2	EIF3K_XENLA	EIF3K_HUMAN	Eukaryotic translation initiation factor 3 subunit K (eIF3k) (Eukaryotic translation initiation factor 3 subunit 12) (Muscle-specific gene M9 protein) (PLAC-24) (eIF-3 p25) (eIF-3 p28)	-1.57	800	22	6800	5	490	97.3424	Cargo A		24.319	25.131	25.06		A1	5639
CL4012Contig1	Q6DKD2_XENLA	LSM7_HUMAN	U6 snRNA-associated Sm-like protein LSm7	0.39	160	400	4600	4.9	330	68.0381	Cargo A		12.053	11.574	11.602		A1	5267
CL12562Contig1	Q76LD2_XENLA	RFC4_HUMAN	Replication factor C subunit 4 (Activator 1 37 kDa subunit) (A1 37 kDa subunit) (Activator 1 subunit 4) (Replication factor C 37 kDa subunit) (RF-C 37 kDa subunit) (RFC37)	2	16	1600	920	4.9	66	13.3626	Cargo A		40.01	72.39	39.682		A1	1100
CL1894Contig1	Q641E8_XENLA	RU2A_HUMAN	U2 small nuclear ribonucleoprotein A' (U2 snRNP A')	1.28	31	590	1600	4.7	110	24.3074	Cargo A		28.372	28.373	28.416		A1	2460
dsrrswapns_comp209041_c6_seq1	PAB2A_XENLA	PABP2_HUMAN	Polyadenylate-binding protein 2 (PABP-2) (Poly(A)-binding protein 2) (Nuclear poly(A)-binding protein 1) (Poly(A)-binding protein II) (PABII) (Polyadenylate-binding nuclear protein 1)	2.71	1.4	720	2800	4.6	200	43.1477	Cargo A		32.449	32.449	32.749		A1	9212
CL1097Contig1	Q4QR44_XENLA	RS15A_HUMAN	40S ribosomal protein S15a	-1.52	3800	110	14000	4.5	1000	224.307	Cargo A		19.601	155.084	14.84		A1	541
CL7800Contig2	Q6DJQ0_XENLA	RL26_HUMAN	60S ribosomal protein L26	-0.57	4600	1200	13000	4.5	950	211.901	Cargo A		17.249	17.19	17.258		A1	7845
dsrrswapns_comp214686_c2_seq3	Q642N8_XENLA	STRAP_HUMAN	Serine-threonine kinase receptor-associated protein (MAP activator with WD repeats) (UNR-interacting protein) (WD-40 repeat protein PT-WD)	-0.44	290	100	9000	4.5	640	143.553	Cargo A		40.964	36.169	38.438		A1	9547
CL116Contig4	EIF3J_XENLA	EIF3J_HUMAN	Eukaryotic translation initiation factor 3 subunit J (eIF3j) (Eukaryotic translation initiation factor 3 subunit 1) (eIF-3-alpha) (eIF3 p35)	-2	570	5.7	4500	4.5	320	72.0835	Cargo A		29.43	47.846	29.062		A1	810
CL2817Contig2	Q0IHE3_XENLA	WDR54_HUMAN	WD repeat-containing protein 54	-2.33	53	0.2	1400	4.4	99	22.3173	Cargo A		36.145	36.145	35.891		A1	4000
CL4738Contig1	Q7SZB2_XENLA	RL27A_HUMAN	60S ribosomal protein L27a	-1.41	3700	150	13000	4.2	920	219.332	Cargo A		16.593	16.593	16.561		A1	5885
CL13252Contig1	GTPB6_XENLA	GTPB6_HUMAN	Putative GTP-binding protein 6 (Pseudoautosomal GTP-binding protein-like)	3	0	42	1500	4.2	110	25.4879	Cargo A		59.163	59.164	56.883		A1	1294
CL6367Contig1	Q2TAV8_XENLA	WDHD1_HUMAN	WD repeat and HMG-box DNA-binding protein 1 (Acidic nucleoplasmic DNA-binding protein 1) (And-1)	2.48	3.1	940	1400	4.2	64	15.3655	Cargo A		124.53	124.532	125.967		A1	7059
CL10631Contig1	DENR_XENLA	DENR_HUMAN	Density-regulated protein (DRP) (Protein DRP1) (Smooth muscle cell-associated protein 3) (SMAP-3)	-2.4	430	1.7	7000	4.1	500	121.771	Cargo A		22.22	48.5	22.092		A1	420
zeinaSSns_comp374318_c1_seq1	XPA_XENLA	XPA_HUMAN	DNA repair protein complementing XP-A cells (Xeroderma pigmentosum group A-complementing protein)	3	0	69	26	740	160	0.0250879	Cargo A		29.286	31.18	31.368		A2	10883
CL4571Contig2	Q28D59_XENTR	F122A_HUMAN	Protein FAM122A				120	740	150	0.0250879	Cargo A		30.979	29.616	30.529		A2	5752
CL12365Contig1	F7BTX4_XENTR	CPEB3_HUMAN	Cytoplasmic polyadenylation element-binding protein 3 (CPE-BP3) (CPE-binding protein 3) (hCPEB-3)				4.8	740	100	0.0250879	Cargo A	NESdbO	69.177	89.287	76.014		A2	1039
CL200Contig6	Q6PF30_XENLA	SPAS2_HUMAN	Spermatogenesis-associated serine-rich protein 2 (Serine-rich spermatocytes and round spermatid 59 kDa protein) (p59scr)	-1.34	37	1.7	26	740	58	0.0250879	Cargo A		59.953	59.954	59.545		A2	2913
dsrrswapns_comp217632_c6_seq7	Q6DCR2_XENLA	SMAP1_HUMAN	Stromal membrane-associated protein 1	-1.31	10	0.5	240	740	57	0.0250879	Cargo A		48.66	38.669	50.386		A2	9846
CL1498Contig2	Q2TAF7_XENLA	CEP85_HUMAN	Centrosomal protein of 85 kDa (Cep85) (Coiled-coil domain-containing protein 21)	-3	16	0	5.1	740	54	0.0250879	Cargo A		80.82	73.555	85.639		A2	1723
CL331Contig1	Q6NUC0_XENLA	TRI62_HUMAN	E3 ubiquitin-protein ligase TRIM62 (EC 6.3.2.-) (Tripartite motif-containing protein 62)	-3	8.3	0	290	740	50	0.0250879	Cargo A		59.491	46.471	54.268		A2	4507
dsrrswapns_comp210944_c2_seq4	Q641F4_XENLA	NEDD1_HUMAN	Protein NEDD1 (Neural precursor cell expressed developmentally down-regulated protein 1) (NEDD-1)	-3	3.8	0	99	660	67	0.101417	Cargo A		73.117	71.511	71.966		A2	5216
CL5849Contig2	Q5M7M1_XENTR	PEX5_HUMAN	Peroxisomal targeting signal 1 receptor (PTS1 receptor) (PTS1R) (PTS1-BP) (Peroxin-5) (Peroxisomal C-terminal targeting signal import receptor) (Peroxisome receptor 1)	-3	17	0	29	650	240	0.37415	Cargo A		67.975		70.865		A2	6731
CL3092Contig2	Q6PF23_XENLA	GCP3_HUMAN	Gamma-tubulin complex component 3 (GCP-3) (hGCP3) (Gamma-ring complex protein 104 kDa) (h104p) (hGrip104) (Spindle pole body protein Spc98 homolog) (hSpc98)	-3	12	0	58	430	190	0.45121	Cargo A		103.64	103.639	103.571		A2	4307
CL1494Contig1	Q7ZY43_XENLA	RAGP1_HUMAN	Ran GTPase-activating protein 1 (RanGAP1)	0.48	44	130	13	400	18000	43.7345	Cargo A		63.446	63.446	63.542		A2	1714
CL1079Contig5	Q66KI6_XENLA	PUM1_HUMAN	Pumilio homolog 1 (HsPUM) (Pumilio-1)	-3	5.5	0	6.5	350	67	0.189113	Cargo A		127.23	186.245	126.473		A2	478
CL878Contig2	Q6DCK2_XENLA	YTHD2_HUMAN	YTH domain-containing family protein 2 (CLL-associated antigen KW-14) (High-glucose-regulated protein 8) (Renal carcinoma antigen NY-REN-2)	-3	17	0	66	300	440	1.47005	Cargo A		55.594	53.502	62.334		A2	8292
CL4973Contig1	RN146_XENLA	RN146_HUMAN	E3 ubiquitin-protein ligase RNF146 (EC 6.3.2.-) (Dactylidin) (Iduna) (RING finger protein 146)	-3	18	0	100	280	360	1.27199	Cargo A		33.55	34.771	38.95		A2	6063
CL1269Contig3	K118B_XENLA	K1C18_HUMAN	Keratin, type I cytoskeletal 18 (Cell proliferation-inducing gene 46 protein) (Cytokeratin-18) (CK-18) (Keratin-18) (K18)	-3	15	0	25	270	380	1.38892	Cargo A		49.687	48.004	48.058		A2	1134
CL633Contig1	F6T141_XENTR	SHRPN_HUMAN	Sharpin (Shank-associated RH domain-interacting protein) (Shank-interacting protein-like 1) (hSIPL1)	-3	15	0	81	270	350	1.30157	Cargo A		49.363		39.949		A2	7040
CL972Contig2	Q5XH35_XENLA	AKTS1_HUMAN	Proline-rich AKT1 substrate 1 (40 kDa proline-rich AKT substrate)	-3	23	0	24	220	440	2.01116	Cargo A		31.61	31.611	27.383		A2	8708
CL3488Contig1	A0AUS9_XENLA	FIP1_HUMAN	Pre-mRNA 3'-end-processing factor FIP1 (hFip1) (FIP1-like 1 protein) (Factor interacting with PAP) (Rearranged in hypereosinophilia)	0.49	63	190	32	220	210	0.953324	Cargo A		69.389	64.461	66.526		A2	4671
dsrrswapns_comp217697_c0_seq6	F7B7G8_XENTR	KDM3B_HUMAN	Lysine-specific demethylase 3B (EC 1.14.11.-) (JmjC domain-containing histone demethylation protein 2B) (Jumonji domain-containing protein 1B) (Nuclear protein 5qNCA)	3	0	130	150	210	110	0.50879	Cargo A		186.08	149.945	191.581		A2	9858
CL1351Contig3	Q3KQ90_XENLA	CF106_HUMAN	Uncharacterized protein C6orf106	0.38	13	31	140	190	530	2.83647	Cargo A		30.511	30.511	32.872		A2	1374
CL1Contig1669	O13027_XENLA	EPN1_HUMAN	Epsin-1 (EH domain-binding mitotic phosphoprotein) (EPS-15-interacting protein 1)	-3	46	0	270	180	730	3.93657	Cargo A		66.015	64.59	60.293		A2	2753
CL4434Contig2	Q6DDJ4_XENLA	GCP2_HUMAN	Gamma-tubulin complex component 2 (GCP-2) (hGCP2) (Gamma-ring complex protein 103 kDa) (h103p) (hGrip103) (Spindle pole body protein Spc97 homolog) (hSpc97)	-3	20	0	39	140	140	0.991634	Cargo A		103.34	59.84	102.534		A2	5637
TC424680	Q7ZXU4_XENLA	K2C8_HUMAN	Keratin, type II cytoskeletal 8 (Cytokeratin-8) (CK-8) (Keratin-8) (K8) (Type-II keratin Kb8)	0.24	310	530	13	120	1900	16.4379	Cargo A		55.661	56.063	53.704		A2	10452
dsrrswapns_comp217647_c6_seq4	CPSF2_XENLA	CPSF2_HUMAN	Cleavage and polyadenylation specificity factor subunit 2 (Cleavage and polyadenylation specificity factor 100 kDa subunit) (CPSF 100 kDa subunit)	0.28	39	74	2.9	110	630	5.48869	Cargo A		88.891	88.986	88.487		A2	9849
CL7708Contig1	Q7ZYM4_XENLA	SPN1_HUMAN	Snurportin-1 (RNA U transporter 1)	-1.54	26	0.8	270	100	220	2.10004	Cargo A	NESdbO, BioGrid	42.886	39.149	41.143		A2	7798
CL1701Contig2	Q6DJE0_XENLA	SC23B_HUMAN	Protein transport protein Sec23B (SEC23-related protein B)	-3	130	0.1	260	68	220	3.32753	Cargo B		86.234	83.201	86.479		B1_1	2116
CL2496Contig1	Q5XHG9_XENLA	RPTOR_HUMAN	Regulatory-associated protein of mTOR (Raptor) (p150 target of rapamycin (TOR)-scaffold protein)	-3	2.3	0	470	63	77	1.22306	Cargo B		152.22	149.531	149.038		B1_1	3577
CL4597Contig2	Q4QQZ8_XENLA	TBG1_HUMAN	Tubulin gamma-1 chain (Gamma-1-tubulin) (Gamma-tubulin complex component 1) (GCP-1)	-3	53	0	330	59	630	10.7222	Cargo B		52.864	51.146	51.17		B1_1	5772
CL44762Contig1	F6VZI1_XENTR	PIWL1_HUMAN	Piwi-like protein 1	-3	210	0	65	43	3700	87.393	Cargo B		99.397	97.645	98.603		B1_1	5669
CL6900Contig1	B3DLD6_XENTR	LAR4B_HUMAN	La-related protein 4B (La ribonucleoprotein domain family member 4B) (La ribonucleoprotein domain family member 5) (La-related protein 5)	-3	18	0	490	37	110	2.95136	Cargo B		80.608	81.328	80.552		B1_1	7380
CL186Contig6	A0JPB0_XENTR	NEK1_HUMAN	Serine/threonine-protein kinase Nek1 (EC 2.7.11.1) (Never in mitosis A-related kinase 1) (NimA-related protein kinase 1) (Renal carcinoma antigen NY-REN-55)	-0.02	24	22	180	31	240	7.57216	Cargo B		144.9	55.802	142.828		B1_1	2413
CL717Contig9	Q9PT63_XENLA	CKAP5_HUMAN	Cytoskeleton-associated protein 5 (Colonic and hepatic tumor overexpressed gene protein) (Ch-TOG)	-3	29	0	380	29	60	2.0701	Cargo B		227.44	228.39	225.495		B1_1	7545
CL5635Contig2	B7ZPG0_XENLA	ZAR1L_HUMAN	ZAR1-like protein	-2.03	450	4.2	240	25	5500	222.306	Cargo B		36.057	33.963	36.01		B1_1	6572
CL7Contig9	Q4V819_XENLA	GORS2_HUMAN	Golgi reassembly-stacking protein 2 (GRS2) (Golgi phosphoprotein 6) (GOLPH6) (Golgi reassembly-stacking protein of 55 kDa) (GRASP55) (p59)	-3	200	0	140	24	2400	97.736	Cargo B		44.835	44.836	47.145		B1_1	7952
CL871Contig2	VIM1_XENLA	VIME_HUMAN	Vimentin	0.71	0.8	4.2	220	23	280	12.3997	Cargo B		54.723	52.845	53.652		B1_1	8264
CL11526Contig1	PATL2_XENLA	PATL2_HUMAN	Protein PAT1 homolog 2 (PAT1-like protein 2) (Protein PAT1 homolog a) (Pat1a) (hPat1a)	-0.76	380	65	50	17	2700	163.62	Cargo B		83.39	109.407	61.464		B1_1	750
CL8563Contig1	Q6IRN1_XENLA	ETUD1_HUMAN	Elongation factor Tu GTP-binding domain-containing protein 1 (Elongation factor-like 1) (Protein FAM42A)	-3	43	0	140	16	99	6.01661	Cargo B		127.42	34.378	125.43		B1_1	8199
CL1906Contig1	L14BB_XENLA	LS14B_HUMAN	Protein LSM14 homolog B (Protein FAM61B) (RNA-associated protein 55B) (hRAP55B)	-3	910	0.9	280	14	11000	773.574	Cargo B		42.038	41.868	42.071		B1_1	2485
zeinaSSns_comp388444_c1_seq5	Q32NK0_XENLA	MYEF2_HUMAN	Myelin expression factor 2 (MEF-2) (MyEF-2) (MST156)	0.33	210	440	170	14	310	21.7285	Cargo B		77.567	71.595	64.122		B1_1	11178
CL14311Contig1	B0JZZ9_XENTR	IF4E_HUMAN	Eukaryotic translation initiation factor 4E (eIF-4E) (eIF4E) (eIF-4F 25 kDa subunit) (mRNA cap-binding protein)	-0.3	410	200	160	11	2300	199.251	Cargo B		25.154	24.635	25.097		B1_1	1587
CL1206Contig3	DDX6_XENLA	DDX6_HUMAN	Probable ATP-dependent RNA helicase DDX6 (EC 3.6.4.13) (ATP-dependent RNA helicase p54) (DEAD box protein 6) (Oncogene RCK)	-2.27	1200	6.3	130	8.8	12000	1324.28	Cargo B	NESdbX	54.167	151.429	54.417		B1_1	951
CL40282Contig1	Q6DKE3_XENLA	H2A1A_HUMAN	Histone H2A type 1-A (Histone H2A/r)	1.96	39	3600	99	7	970	138.478	Cargo B		14.859	14.859	14.234		B1_1	5286
CL912Contig2	RSSA_XENLA	RSSA_HUMAN	40S ribosomal protein SA (37 kDa laminin receptor precursor) (37LRP) (37/67 kDa laminin receptor) (LRP/LR) (67 kDa laminin receptor) (67LR) (Colon carcinoma laminin-binding protein) (Laminin receptor 1) (LamR) (Laminin-binding protein precursor p40) (LBP/p40) (Multidrug resistance-associated protein MGr1-Ag) (NEM/1CHD4)	-1.15	5500	380	390	6.7	8600	1285.84	Cargo B		34.058	34.058	32.854		B1_1	8450
CL5003Contig3	DCAF8_XENLA	DCAF8_HUMAN	DDB1- and CUL4-associated factor 8 (WD repeat-containing protein 42A)	0.11	44	57	290	6.7	200	29.4189	Cargo B	NESdbO, BioGrid	67.107	67.108	66.852		B1_1	6108
CL691Contig4	IF23A_XENLA	IF2B3_HUMAN	Insulin-like growth factor 2 mRNA-binding protein 3 (IGF2 mRNA-binding protein 3) (IMP-3) (IGF-II mRNA-binding protein 3) (KH domain-containing protein overexpressed in cancer) (hKOC) (VICKZ family member 3)	-1.78	1200	21	59	5.4	2100	391.034	Cargo B		65.514	65.643	63.705		B1_1	7396
CL23448Contig1	A3KMU6_XENLA	LSM3_HUMAN	U6 snRNA-associated Sm-like protein LSm3	0.36	690	1600	240	4.5	240	54.5009	Cargo B		11.817	11.794	11.845		B1_1	3387
CL2943Contig3	Q6IP85_XENLA	VTA1_HUMAN	Vacuolar protein sorting-associated protein VTA1 homolog (Dopamine-responsive gene 1 protein) (DRG-1) (LYST-interacting protein 5) (LIP5) (SKD1-binding protein 1) (SBP1)	-1.52	380	11	72	4.4	340	78.3677	Cargo B		33.789	33.789	33.879		B1_1	4138
CL10340Contig1	Q642R8_XENLA	DPOD1_HUMAN	DNA polymerase delta catalytic subunit (EC 2.7.7.7) (DNA polymerase subunit delta p125)	2.02	15	1500	260	4.4	280	63.1344	Cargo B		125.45	235.283	123.631		B1_1	319
CL22Contig8	RS20_XENLA	RS20_HUMAN	40S ribosomal protein S20	-1.72	6800	130	370	4.2	2800	665.368	Cargo B		13.356	13.356	13.373		B1_1	3331
dsrrswapns_comp208676_c3_seq2	Q8AVI3_XENLA	RLA0_HUMAN	60S acidic ribosomal protein P0 (60S ribosomal protein L10E)	-1.81	4300	67	1500	3.9	3800	984.827	Cargo B		34.071	34.097	34.274		B1_2	9194
CL9980Contig1	DPCD_XENLA	DPCD_HUMAN	Protein DPCD	-0.39	200	82	8700	3.9	620	157.559	Cargo B		23.393	23.394	23.24		B1_2	8819
zeinaSSns_comp387325_c1_seq1	Q642N9_XENLA	SYTC_HUMAN	Threonine--tRNA ligase, cytoplasmic (EC 6.1.1.3) (Threonyl-tRNA synthetase) (ThrRS)	-2.86	520	0.7	8200	3.9	590	149.032	Cargo B		82.853	82.88	83.435		B1_2	11089
CL118Contig5	BUB3_XENLA	BUB3_HUMAN	Mitotic checkpoint protein BUB3	1.64	32	1400	2100	3.9	150	39.1351	Cargo B		37.252	69.012	37.155		B1_2	885
CL233Contig4	Q4QQP4_XENLA	RFC3_HUMAN	Replication factor C subunit 3 (Activator 1 38 kDa subunit) (A1 38 kDa subunit) (Activator 1 subunit 3) (Replication factor C 38 kDa subunit) (RF-C 38 kDa subunit) (RFC38)	1.79	27	1700	1500	3.9	110	27.8457	Cargo B		40.341	40.342	40.556		B1_2	3377
CL2579Contig2	CDK1A_XENLA	CDK1_HUMAN	Cyclin-dependent kinase 1 (CDK1) (EC 2.7.11.22) (EC 2.7.11.23) (Cell division control protein 2 homolog) (Cell division protein kinase 1) (p34 protein kinase)	0.17	170	260	3800	3.8	270	72.7074	Cargo B		36.044	34.506	34.095		B1_2	3707
CL114Contig16	Q7ZXB0_XENLA	SMN_HUMAN	Survival motor neuron protein (Component of gems 1) (Gemin-1)	-1.25	140	7.7	1200	3.8	82	21.7613	Cargo B		31.848	232.039	31.849		B1_2	734
dsrrswapns_comp214958_c0_seq5	Q6IP72_XENLA	CAB39_HUMAN	Calcium-binding protein 39 (MO25alpha) (Protein Mo25)	-0.06	170	150	4500	3.7	320	88.2523	Cargo B		39.777	39.778	39.869		B1_2	9569
CL6414Contig1	Q6GQD4_XENLA	RPAB3_HUMAN	DNA-directed RNA polymerases I, II, and III subunit RPABC3 (RNA polymerases I, II, and III subunit ABC3) (DNA-directed RNA polymerase II subunit H) (DNA-directed RNA polymerases I, II, and III 17.1 kDa polypeptide) (RPB17) (RPB8 homolog) (hRPB8)	1	75	750	2200	3.7	160	41.6601	Cargo B		17.157	17.157	17.143		B1_2	7095
CL166Contig3	Q0IHK2_XENLA	SRSF1_HUMAN	Serine/arginine-rich splicing factor 1 (Alternative-splicing factor 1) (ASF-1) (Splicing factor, arginine/serine-rich 1) (pre-mRNA-splicing factor SF2, P33 subunit)	1.91	7	570	890	3.6	64	17.4904	Cargo B		16.205	32.11	27.745		B1_2	2056
CL100Contig17	NPL1B_XENLA	NP1L1_HUMAN	Nucleosome assembly protein 1-like 1 (NAP-1-related protein) (hNRP)	-0.75	2300	410	3100	3.4	6300	1889.02	Cargo B		52.507	146.402	45.374		B1_2	220
CL6255Contig1	Q6IP84_XENLA	RPAC1_HUMAN	DNA-directed RNA polymerases I and III subunit RPAC1 (DNA-directed RNA polymerase I subunit C) (RNA polymerases I and III subunit AC1) (AC40) (DNA-directed RNA polymerases I and III 40 kDa polypeptide) (RPA40) (RPA39) (RPC40)	1.57	25	930	1500	3.4	110	32.9445	Cargo B		39.36	39.36	39.25		B1_2	6984
TC467635	MCS1A_XENLA	MCTS1_HUMAN	Malignant T-cell-amplified sequence 1 (MCT-1) (Multiple copies T-cell malignancies)	-1.75	750	13	9000	3.3	650	196.348	Cargo B		20.53	20.53	20.555		B1_2	10825
CL3906Contig2	Q7ZYI5_XENLA	ACL6A_HUMAN	Actin-like protein 6A (53 kDa BRG1-associated factor A) (Actin-related protein Baf53a) (ArpNbeta) (BRG1-associated factor 53A) (BAF53A) (INO80 complex subunit K)	0.89	58	450	850	3.3	61	18.2397	Cargo B		47.623	47.624	47.461		B1_2	5124
CL313Contig4	A7E222_XENLA	GCN1L_HUMAN	Translational activator GCN1 (HsGCN1) (GCN1-like protein 1)	-2.79	190	0.3	780	3.2	56	17.4946	Cargo B		295.76	119.045	292.758		B1_2	4347
CL385Contig5	Q6GN46_XENLA	HAP28_HUMAN	28 kDa heat- and acid-stable phosphoprotein (PDGF-associated protein) (PAP) (PDGFA-associated protein 1) (PAP1)	-0.89	590	76	3000	3	210	70.5576	Cargo B		19.79	19.79	20.63		B1_2	5073
CL1474Contig3	Q7ZXW4_XENLA	PRP19_HUMAN	Pre-mRNA-processing factor 19 (EC 6.3.2.-) (Nuclear matrix protein 200) (PRP19/PSO4 homolog) (hPso4) (Senescence evasion factor)	1.54	69	2400	2800	3	200	66.8128	Cargo B		54.772	54.772	55.181		B1_2	1665
CL355Contig7	Q6NUD5_XENLA	TS101_HUMAN	Tumor susceptibility gene 101 protein (ESCRT-I complex subunit TSG101)	-0.32	120	56	1400	2.9	100	35.863	Cargo B	BioGrid	44.31	44.414	43.944		B1_2	4754
CL580Contig5	Q8AVT2_XENLA	RSMN_HUMAN	Small nuclear ribonucleoprotein-associated protein N (snRNP-N) (Sm protein D) (Sm-D) (Sm protein N) (Sm-N) (SmN) (Tissue-specific-splicing protein)	0.52	81	270	960	2.9	69	24.0499	Cargo B		24.131	24.131	24.614		B1_2	6708
CL5705Contig3	Q6IP15_XENLA	IDH3B_HUMAN	Isocitrate dehydrogenase [NAD] subunit beta, mitochondrial (EC 1.1.1.41) (Isocitric dehydrogenase subunit beta) (NAD(+)-specific ICDH subunit beta)				4200	2.8	300	107.55	Cargo B		44.469	41.754	42.184	MT	B1_2	6622
TC441286	Q6NU16_XENLA	IF1AX_HUMAN	Eukaryotic translation initiation factor 1A, X-chromosomal (eIF-1A X isoform) (Eukaryotic translation initiation factor 4C) (eIF-4C)	-1.19	670	43	3000	2.8	220	76.0779	Cargo B		17.574	16.46	16.46		B1_2	10595
dsrrswapns_comp209405_c1_seq2	Q6GNU1_XENLA	ARC1B_HUMAN	Actin-related protein 2/3 complex subunit 1B (Arp2/3 complex 41 kDa subunit) (p41-ARC)	-3	42	0	790	2.8	56	20.3735	Cargo B		41.394	41.394	40.95		B1_2	9220
CL2843Contig2	Q6GPS6_XENLA	PPP5_HUMAN	Serine/threonine-protein phosphatase 5 (PP5) (EC 3.1.3.16) (Protein phosphatase T) (PP-T) (PPT)	-1.1	480	38	3400	2.6	1000	382.84	Cargo B	BioGrid	58.254	56.276	56.879		B1_2	4038
zeinaSSns_comp384047_c1_seq3	Q5U4R4_XENLA	TSSC4_HUMAN	Protein TSSC4 (Tumor-suppressing STF cDNA 4 protein) (Tumor-suppressing subchromosomal transferable fragment candidate gene 4 protein)	-0.67	220	47	3600	2.6	260	100.16	Cargo B		32.652	31.821	34.326		B1_2	10970
CL9Contig25	Q7ZY46_XENLA	KLDC4_HUMAN	Kelch domain-containing protein 4	-3	150	0	1400	2.6	97	36.8722	Cargo B		65.224	65.225	57.892		B1_2	8834
CL688Contig3	Q6GNQ0_XENLA	SRC8_HUMAN	Src substrate cortactin (Amplaxin) (Oncogene EMS1)	-3	260	0.2	810	2.5	190	77.2491	Cargo B		61.717	63.77	61.586		B1_2	7367
CL6024Contig2	A1L3J7_XENLA	GANAB_HUMAN	Neutral alpha-glucosidase AB (EC 3.2.1.84) (Alpha-glucosidase 2) (Glucosidase II subunit alpha)				740	2.5	53	20.8316	Cargo B		110.41	106.09	106.874	ER	B1_2	6855
CL6308Contig3	Q6DE93_XENLA	IST1_HUMAN	IST1 homolog (hIST1) (Putative MAPK-activating protein PM28)	-1.29	140	7.1	2200	2.4	160	65.9863	Cargo B		38.989	38.604	39.751		B1_2	7019
CL5419Contig1	Q7T0Y0_XENLA	LRC47_HUMAN	Leucine-rich repeat-containing protein 47	-1.68	220	4.5	750	2.4	100	44.1942	Cargo B		62.947	62.948	63.473		B1_2	6424
CL9205Contig1	Q6NRU3_XENLA	RFC2_HUMAN	Replication factor C subunit 2 (Activator 1 40 kDa subunit) (A1 40 kDa subunit) (Activator 1 subunit 2) (Replication factor C 40 kDa subunit) (RF-C 40 kDa subunit) (RFC40)	1.93	18	1500	830	2.4	59	24.7054	Cargo B		38.587	38.457	39.157		B1_2	8487
CL1Contig493	SKP1_XENLA	SKP1_HUMAN	S-phase kinase-associated protein 1 (Cyclin-A/CDK2-associated protein p19) (p19A) (Organ of Corti protein 2) (OCP-2) (Organ of Corti protein II) (OCP-II) (RNA polymerase II elongation factor-like protein) (SIII) (Transcription elongation factor B polypeptide 1-like) (p19skp1)	0.31	97	200	1300	2.2	92	42.6281	Cargo B		24.809	18.658	18.658		B1_2	2832
CL5677Contig1	A1L1H7_XENLA	SPT5H_HUMAN	Transcription elongation factor SPT5 (hSPT5) (DRB sensitivity-inducing factor 160 kDa subunit) (DSIF p160) (DRB sensitivity-inducing factor large subunit) (DSIF large subunit) (Tat-cotransactivator 1 protein) (Tat-CT1 protein)	2.68	1.1	530	1100	2.2	77	34.9094	Cargo B		120.63	120.627	121		B1_2	6597
CL400Contig2	I4A3A_XENLA	IF4A3_HUMAN	Eukaryotic initiation factor 4A-III (eIF-4A-III) (eIF4A-III) (EC 3.6.4.13) (ATP-dependent RNA helicase DDX48) (ATP-dependent RNA helicase eIF4A-3) (DEAD box protein 48) (Eukaryotic initiation factor 4A-like NUK-34) (Eukaryotic translation initiation factor 4A isoform 3) (Nuclear matrix protein 265) (NMP 265) (hNMP 265) [Cleaved into: Eukaryotic initiation factor 4A-III, N-terminally processed]	0.54	470	1600	8800	2.1	630	297.745	Cargo B		47.079	46.98	46.871		B1_2	5262
CL14986Contig2		GRL1A_HUMAN	DNA-directed RNA polymerase II subunit GRINL1A (DNA-directed RNA polymerase II subunit M) (Glutamate receptor-like protein 1A)	-3	1.9	0	680	740	49	0.0250879	Cargo B		36.496		41.74		B1_3	1722
CL374Contig9	Q6GPY2_XENLA	ARRB2_HUMAN	Beta-arrestin-2 (Arrestin beta-2)	-3	0.5	0	680	740	49	0.0250879	Cargo B	NESdbO	48.47	46.21	46.106		B1_3	4974
CL16388Contig1	A4IGR2_XENTR	RT06_HUMAN	28S ribosomal protein S6, mitochondrial (MRP-S6) (S6mt)				670	740	48	0.0250879	Cargo B		14.034		14.227		B1_3	2016
CL2409Contig1	A0JMY9_XENLA	HIC2_HUMAN	Hypermethylated in cancer 2 protein (Hic-2) (HIC1-related gene on chromosome 22 protein) (Hic-3) (Zinc finger and BTB domain-containing protein 30)	2.84	0.3	180	670	740	48	0.0250879	Cargo B		60.156	50.532	66.156		B1_3	3459
CL15605Contig1	F7EDY1_XENTR	PAR15_HUMAN	Poly [ADP-ribose] polymerase 15 (PARP-15) (EC 2.4.2.30) (ADP-ribosyltransferase diphtheria toxin-like 7) (ARTD7) (B-aggressive lymphoma protein 3)	-0.45	2.2	0.8	660	740	48	0.0250879	Cargo B		65.256	35.782	74.576		B1_3	1879
CL3109Contig3	F7CX25_XENTR	RIMKB_HUMAN	Beta-citrylglutamate synthase B (EC 6.3.1.17) (N-acetyl-aspartylglutamate synthetase B) (NAAG synthetase B) (NAAGS) (EC 6.3.2.41) (Ribosomal protein S6 modification-like protein B)	-3	1.3	0	660	740	47	0.0250879	Cargo B		43.826		42.464		B1_3	4319
CL16752Contig1				-3	8.9	0	650	740	47	0.0250879	Cargo B		28.007				B1_3	2062
CL14787Contig1	F6Y0P2_XENTR	CJ088_HUMAN	Uncharacterized protein C10orf88	-3	5.7	0	640	740	46	0.0250879	Cargo B		47.051		49.249		B1_3	1671
CL1992Contig3	EDC3_XENLA	EDC3_HUMAN	Enhancer of mRNA-decapping protein 3 (LSM16 homolog) (YjeF N-terminal domain-containing protein 2) (YjeF_N2) (hYjeF_N2) (YjeF domain-containing protein 1)	-3	2.6	0	640	740	46	0.0250879	Cargo B		55.575	55.576	56.078		B1_3	2629
CL1088Contig3	Q6GPD4_XENLA	TGS1_HUMAN	Trimethylguanosine synthase (EC 2.1.1.-) (CLL-associated antigen KW-2) (Cap-specific guanine-N2 methyltransferase) (Hepatocellular carcinoma-associated antigen 137) (Nuclear receptor coactivator 6-interacting protein) (PRIP-interacting protein with methyltransferase motif) (PIMT) (PIPMT)	0.28	10	20	620	740	45	0.0250879	Cargo B	NESdbO	94.64	61.803	96.62		B1_3	519
CL8945Contig1	Q6DCY8_XENLA	WDR5_HUMAN	WD repeat-containing protein 5 (BMP2-induced 3-kb gene protein)	2.5	0.3	110	620	740	45	0.0250879	Cargo B		36.698	36.699	36.588		B1_3	8360
dsrrswapns_comp216033_c0_seq4	B7ZRL0_XENLA	FMR1_HUMAN	Fragile X mental retardation protein 1 (FMRP) (Protein FMR-1)	-3	35	0	620	740	45	0.0250879	Cargo B	NESdbO	68.839	63.782	71.174		B1_3	9676
TC465854	Q3KQ03_XENLA	TMED8_HUMAN	Protein TMED8	-3	5.7	0	610	740	44	0.0250879	Cargo B		7.7215	26.384	35.74		B1_3	10806
dsrrswapns_comp217509_c5_seq1	B3DLH8_XENTR				0	0	600	740	43	0.0250879	Cargo B		9.4456				B1_3	9833
CL4902Contig1	Q7ZX91_XENLA	AP1S1_HUMAN	AP-1 complex subunit sigma-1A (Adaptor protein complex AP-1 subunit sigma-1A) (Adaptor-related protein complex 1 subunit sigma-1A) (Clathrin assembly protein complex 1 sigma-1A small chain) (Clathrin coat assembly protein AP19) (Golgi adaptor HA1/AP1 adaptin sigma-1A subunit) (HA1 19 kDa subunit) (Sigma 1a subunit of AP-1 clathrin) (Sigma-adaptin 1A) (Sigma1A-adaptin)	-3	52	0	590	740	42	0.0250879	Cargo B		18.708	21.214	18.733		B1_3	6015
dsrrswapns_comp214155_c2_seq3	Q5XGZ5_XENLA	SNX18_HUMAN	Sorting nexin-18 (SH3 and PX domain-containing protein 3B) (Sorting nexin-associated Golgi protein 1)	-0.67	5.8	1.2	590	740	42	0.0250879	Cargo B		65.722	65.66	68.894		B1_3	9511
CL447Contig10	Q2VPE9_XENLA	DKC1_HUMAN	H/ACA ribonucleoprotein complex subunit 4 (EC 5.4.99.-) (CBF5 homolog) (Dyskerin) (Nopp140-associated protein of 57 kDa) (Nucleolar protein NAP57) (Nucleolar protein family A member 4) (snoRNP protein DKC1)	2.38	2.3	550	570	740	41	0.0250879	Cargo B		60.796	56.965	57.674		B1_3	5673
CL6396Contig1	LARP7_XENTR	LARP7_HUMAN	La-related protein 7 (La ribonucleoprotein domain family member 7) (P-TEFb-interaction protein for 7SK stability) (PIP7S)	2.57	0.5	200	570	740	41	0.0250879	Cargo B		67.197	48.997	66.899		B1_3	7076
dsrrswapns_comp209815_c0_seq1	B7ZRJ3_XENLA	REL_HUMAN	Proto-oncogene c-Rel				570	740	41	0.0250879	Cargo B		63.176	63.14	68.52		B1_3	9244
TC465113	Q8AVY3_XENLA	SNP29_HUMAN	Synaptosomal-associated protein 29 (SNAP-29) (Soluble 29 kDa NSF attachment protein) (Vesicle-membrane fusion protein SNAP-29)	-3	1.5	0	540	740	39	0.0250879	Cargo B		22.917	29.493	28.97		B1_3	10800
dsrrswapns_comp215142_c6_seq1	Q6INL9_XENLA	HAUS2_HUMAN	HAUS augmin-like complex subunit 2 (Centrosomal protein of 27 kDa) (Cep27)	-3	10	0	540	740	38	0.0250879	Cargo B		25.11	25.111	26.933		B1_3	9590
dsrrswapns_comp216844_c0_seq2	F6ZIY6_XENTR	SC24D_HUMAN	Protein transport protein Sec24D (SEC24-related protein D)	-3	2.2	0	520	740	37	0.0250879	Cargo B		107.97	123.522	113.01		B1_3	9754
CL4876Contig2	Q0P4P9_XENTR	DHX35_HUMAN	Probable ATP-dependent RNA helicase DHX35 (EC 3.6.4.13) (DEAH box protein 35)	2.05	1.1	120	500	740	36	0.0250879	Cargo B		79.455	87.235	78.91		B1_3	5998
CL1751Contig1	A2VDA0_XENLA	PININ_HUMAN	Pinin (140 kDa nuclear and cell adhesion-related phosphoprotein) (Desmosome-associated protein) (Domain-rich serine protein) (DRS protein) (DRSP) (Melanoma metastasis clone A protein) (Nuclear protein SDK3) (SR-like protein)	2.94	0.2	140	550	600	40	0.0663224	Cargo B		81.801	81.36	81.614		B1_3	2204
CL936Contig1	Q4V836_XENLA	DDX27_HUMAN	Probable ATP-dependent RNA helicase DDX27 (EC 3.6.4.13) (DEAD box protein 27)	3	0	430	670	390	48	0.124486	Cargo B		86.385	86.387	89.835		B1_3	8567
CL166Contig5		NAF1_HUMAN	H/ACA ribonucleoprotein complex non-core subunit NAF1 (hNAF1)	0.74	14	74	670	300	48	0.15718	Cargo B		54.845		53.717		B1_3	2057
CL2578Contig2	Q6PA51_XENLA	ARAF_HUMAN	Serine/threonine-protein kinase A-Raf (EC 2.7.11.1) (Proto-oncogene A-Raf) (Proto-oncogene A-Raf-1) (Proto-oncogene Pks)	-3	20	0	620	260	44	0.168944	Cargo B		72.036	72.037	67.585		B1_3	3706
CL25Contig6	RC3H1_XENLA	RC3H1_HUMAN	Roquin-1 (Roquin) (RING finger and C3H zinc finger protein 1) (RING finger and CCCH-type zinc finger domain-containing protein 1) (RING finger protein 198)	-3	4.6	0	590	190	42	0.226869	Cargo B		123.58	123.577	125.736		B1_3	3745
CL1453Contig4	Q5M781_XENLA	DYL2_HUMAN	Dynein light chain 2, cytoplasmic (8 kDa dynein light chain b) (DLC8b) (Dynein light chain LC8-type 2)	-0.3	100	51	690	83	49	0.594315	Cargo B		10.35	10.35	10.35		B1_3	1623
CL7774Contig1	F7A9G2_XENTR	ANKZ1_HUMAN	Ankyrin repeat and zinc finger domain-containing protein 1 (Zinc finger protein 744)	-1.83	11	0.2	670	71	48	0.666941	Cargo B		80.731		80.927		B1_3	7828
CL91Contig4	UBF1A_XENLA	UBF1_HUMAN	Nucleolar transcription factor 1 (Autoantigen NOR-90) (Upstream-binding factor 1) (UBF-1)	2.78	0.3	190	680	65	49	0.755816	Cargo B		79.168	79.168	89.406		B1_3	8482
CL2178Contig2	RCD1_XENLA	RCD1_HUMAN	Cell differentiation protein RCD1 homolog (Rcd-1) (CCR4-NOT transcription complex subunit 9)	-2.67	39	0.1	630	60	45	0.753427	Cargo B		33.557	33.557	33.631		B1_3	3162
CL1428Contig2	F6ZRV4_XENTR	MTOR_HUMAN	Serine/threonine-protein kinase mTOR (EC 2.7.11.1) (FK506-binding protein 12-rapamycin complex-associated protein 1) (FKBP12-rapamycin complex-associated protein) (Mammalian target of rapamycin) (mTOR) (Mechanistic target of rapamycin) (Rapamycin and FKBP12 target 1) (Rapamycin target protein 1)	-3	3.2	0	650	49	46	0.950012	Cargo B		288.03	301.459	288.892		B1_3	1583
CL1879Contig1	Q6PF41_XENLA	WBP11_HUMAN	WW domain-binding protein 11 (WBP-11) (Npw38-binding protein) (NpwBP) (SH3 domain-binding protein SNP70) (Splicing factor that interacts with PQBP-1 and PP1)	1.88	2.8	210	690	47	49	1.04603	Cargo B		68.617	68.618	69.998		B1_3	2427
CL7649Contig2	B1WAV3_XENTR	HAUS5_HUMAN	HAUS augmin-like complex subunit 5	-3	21	0	570	46	41	0.886929	Cargo B		77.257		71.682		B1_3	7770
CL4264Contig1	F6ZCZ9_XENTR	ASCC3_HUMAN	Activating signal cointegrator 1 complex subunit 3 (EC 3.6.4.12) (ASC-1 complex subunit p200) (ASC1p200) (Helicase, ATP binding 1) (Trip4 complex subunit p200)	-3	8.1	0	650	39	46	1.17231	Cargo B		251.9	52.429	251.46		B1_3	5501
zeinaSSns_comp389570_c0_seq2	PERQ2_XENLA	PERQ2_HUMAN	PERQ amino acid-rich with GYF domain-containing protein 2 (GRB10-interacting GYF protein 2) (Trinucleotide repeat-containing gene 15 protein)	-0.54	8.7	2.5	520	36	37	1.03255	Cargo B		146.23	141.636	150.07		B1_3	11294
CL7370Contig1	Q6DFI7_XENLA	CDC16_HUMAN	Cell division cycle protein 16 homolog (Anaphase-promoting complex subunit 6) (APC6) (CDC16 homolog) (CDC16Hs) (Cyclosome subunit 6)	0.3	9.2	18	610	33	43	1.32051	Cargo B		71.81	71.811	71.656		B1_3	7625
CL1994Contig4	Q6DCJ2_XENLA	ELL2_HUMAN	RNA polymerase II elongation factor ELL2	2.09	3	370	600	27	43	1.62212	Cargo B		71.692	54.886	72.324		B1_3	2634
CL1046Contig3	Q3B8K0_XENLA	NOP58_HUMAN	Nucleolar protein 58 (Nucleolar protein 5)	2.51	4.1	1300	530	26	38	1.46353	Cargo B		59.849	167.863	59.578		B1_3	366
CL7750Contig1	Q6NU36_XENLA	APC4_HUMAN	Anaphase-promoting complex subunit 4 (APC4) (Cyclosome subunit 4)	-0.29	19	9.7	590	25	42	1.67788	Cargo B		89.659	89.66	92.116		B1_3	7815
CL2210Contig2	F7C1Q1_XENTR	VPRBP_HUMAN	Protein VPRBP (DDB1- and CUL4-associated factor 1) (HIV-1 Vpr-binding protein) (VprBP) (Serine/threonine-protein kinase VPRBP) (EC 2.7.11.1) (Vpr-interacting protein)	1.35	1.7	38	550	25	39	1.57501	Cargo B		166.88		169.007		B1_3	3207
CL1903Contig4	B7ZP67_XENLA	MPIP3_HUMAN	M-phase inducer phosphatase 3 (EC 3.1.3.48) (Dual specificity phosphatase Cdc25C)	-3	13	0	680	23	48	2.07295	Cargo B		62.182	62.183	53.365		B1_3	2480
zeinaSSns_comp389684_c1_seq4	B2GTY0_XENLA	MAGI1_HUMAN	Membrane-associated guanylate kinase, WW and PDZ domain-containing protein 1 (Atrophin-1-interacting protein 3) (AIP-3) (BAI1-associated protein 1) (BAP-1) (Membrane-associated guanylate kinase inverted 1) (MAGI-1) (Trinucleotide repeat-containing gene 19 protein) (WW domain-containing protein 3) (WWP3)	-1.07	9.9	0.8	510	21	36	1.73217	Cargo B		150.45	102.617	164.581		B1_3	11309
CL10163Contig1	F7DHG8_XENTR	PACS1_HUMAN	Phosphofurin acidic cluster sorting protein 1 (PACS-1)	-1.33	10	0.5	640	20	46	2.30123	Cargo B		96.658	23.419	104.898		B1_3	247
CL3470Contig1	F7BLR6_XENTR	RPB1_HUMAN	DNA-directed RNA polymerase II subunit RPB1 (RNA polymerase II subunit B1) (EC 2.7.7.6) (DNA-directed RNA polymerase II subunit A) (DNA-directed RNA polymerase III largest subunit) (RNA-directed RNA polymerase II subunit RPB1) (EC 2.7.7.48)	1.34	7.7	170	610	20	44	2.17602	Cargo B		166.89	195.212	217.176		B1_3	4659
CL1321Contig2	Q7ZYG7_XENLA	AP2B1_HUMAN	AP-2 complex subunit beta (AP105B) (Adaptor protein complex AP-2 subunit beta) (Adaptor-related protein complex 2 subunit beta) (Beta-2-adaptin) (Beta-adaptin) (Clathrin assembly protein complex 2 beta large chain) (Plasma membrane adaptor HA2/AP2 adaptin beta subunit)	-2.81	400	0.6	660	18	47	2.5913	Cargo B		105.59	105.62	104.553		B1_3	1282
CL183Contig7				0.764571	16	95	640	15	45	3.02668	Cargo B		138.18				B1_3	2352
CL1080Contig6	Q6GN51_XENLA	ARHG7_HUMAN	Rho guanine nucleotide exchange factor 7 (Beta-Pix) (COOL-1) (PAK-interacting exchange factor beta) (p85)	-3	9.7	0	580	15	41	2.77005	Cargo B		87.081	202.346	90.012		B1_3	489
CL10348Contig1	B0JZH4_XENTR	C1TM_HUMAN	Monofunctional C1-tetrahydrofolate synthase, mitochondrial (EC 6.3.4.3) (Formyltetrahydrofolate synthetase)				570	15	41	2.72228	Cargo B		106.31	89.321	105.79	MT	B1_3	322
CL10855Contig1	A1L106_XENLA	EIF2D_HUMAN	Eukaryotic translation initiation factor 2D (eIF2d) (Hepatocellular carcinoma-associated antigen 56) (Ligatin)	-3	130	0	610	12	44	3.75117	Cargo B		64.889	22.543	64.706		B1_3	507
CL2827Contig2	F6ZKT1_XENTR	SC24A_HUMAN	Protein transport protein Sec24A (SEC24-related protein A)	-3	68	0	610	11	44	3.86442	Cargo B		121.89	123.522	119.749		B1_3	4017
TC462321	B3DLK7_XENLA			1.53814	5.9	200	570	9.4	41	4.29557	Cargo B		9.0992	123.803			B1_3	10768
CL9178Contig1		SNX8_HUMAN	Sorting nexin-8	-0.31	53	26	630	8.8	45	5.14434	Cargo B		47.424		52.569		B1_3	8471
zeinaSSns_comp353750_c0_seq1	Q0IH89_XENLA	DUS12_HUMAN	Dual specificity protein phosphatase 12 (EC 3.1.3.16) (EC 3.1.3.48) (Dual specificity tyrosine phosphatase YVH1)	-0.34	81	37	650	7.1	47	6.62953	Cargo B		33.598	33.642	37.687		B1_3	6787
CL2089Contig4	B3DLH8_XENTR	MAST2_HUMAN	Microtubule-associated serine/threonine-protein kinase 2 (EC 2.7.11.1)	-0.04	20	18	590	6.7	42	6.34862	Cargo B		216.46	164.805	196.436		B1_3	3021
dsrrswapns_comp211620_c3_seq1	Q6DEC2_XENLA	PDCL3_HUMAN	Phosducin-like protein 3 (HTPHLP) (PhPL3) (Viral IAP-associated factor 1) (VIAF-1)	-0.64	31	7.2	630	6.6	45	6.74866	Cargo B		27.407	27.437	27.614		B1_3	3409
CL12477Contig1	BRCC3_XENLA	BRCC3_HUMAN	Lys-63-specific deubiquitinase BRCC36 (EC 3.4.19.-) (BRCA1-A complex subunit BRCC36) (BRCA1/BRCA2-containing complex subunit 3) (BRCA1/BRCA2-containing complex subunit 36) (BRISC complex subunit BRCC36)	0.91	6.4	52	610	5.7	44	7.63938	Cargo B		29.789	235.283	36.072		B1_3	1076
CL501Contig3	F7AQ54_XENTR	ZO1_HUMAN	Tight junction protein ZO-1 (Tight junction protein 1) (Zona occludens protein 1) (Zonula occludens protein 1)	-1.93	33	0.4	540	5.7	39	6.79912	Cargo B		195.58	108.87	195.459		B1_3	6122
BG513260	Q7SZF6_XENLA			1.40964	9.3	240	510	5.5	36	6.54787	Cargo B		12.783	240.928			B1_3	50
CL1Contig704	Q7ZWX7_XENLA	SRSF3_HUMAN	Serine/arginine-rich splicing factor 3 (Pre-mRNA-splicing factor SRP20) (Splicing factor, arginine/serine-rich 3)	3	0	460	520	5.2	37	7.20572	Cargo B		16.5	22.372	19.33		B1_3	2853
CL522Contig3	Q6PAB6_XENLA	STAU2_HUMAN	Double-stranded RNA-binding protein Staufen homolog 2	-3	30	0	570	4.8	41	8.44973	Cargo B	NESdbO	45.293	46.657	62.641		B1_3	6283
CL11048Contig2	Q6NRL7_XENLA	FKBPL_HUMAN	FK506-binding protein-like (WAF-1/CIP1 stabilizing protein 39) (WISp39)	-3	13	0	590	4.2	42	9.94221	Cargo B		30.508	121.396	38.176		B1_3	562
CL6027Contig1	Q6DDZ7_XENLA	Z3H7A_HUMAN	Zinc finger CCCH domain-containing protein 7A	-0.7	0.7	0.1	8.4	740	47	0.0250879	Cargo B		102.88	102.884	110.538		B2_1	6859
CL11127Contig1	F6T881_XENTR	PTH_HUMAN	Probable peptidyl-tRNA hydrolase (PTH) (EC 3.1.1.29)				52	740	46	0.0250879	Cargo B		24.468	50.667	22.937		B2_1	596
CL1083Contig3	Q7ZYF0_XENLA	HDAC6_HUMAN	Histone deacetylase 6 (HD6) (EC 3.5.1.98)	-3	21	0	9.4	740	37	0.0292522	Cargo B	BioGrid	138.13	58.699	131.419		B2_1	496
CL2882Contig1	Q6DCR3_XENLA	RIOK3_HUMAN	Serine/threonine-protein kinase RIO3 (EC 2.7.11.1) (RIO kinase 3) (sudD homolog)	-3	20	0	490	740	35	0.0250879	Cargo B		58.085	58.086	59.093		B2_1	4076
CL1597Contig1	Q6GLT9_XENLA	SMAG2_HUMAN	Protein Smaug homolog 2 (Smaug 2) (hSmaug2) (Sterile alpha motif domain-containing protein 4B) (SAM domain-containing protein 4B)	-3	0.8	0	38	740	35	0.0250879	Cargo B		75.047	75.048	75.483		B2_1	1951
CL35366Contig1				-3	33	0	470	740	34	0.0250879	Cargo B		16.855				B2_1	4728
CL4083Contig1	Q641E4_XENLA	APC7_HUMAN	Anaphase-promoting complex subunit 7 (APC7) (Cyclosome subunit 7)	0.24	19	33	470	740	34	0.0250879	Cargo B		63.086	63.086	66.855		B2_1	5335
CL7Contig3	Q505L9_XENLA	RFIP1_HUMAN	Rab11 family-interacting protein 1 (Rab11-FIP1) (Rab-coupling protein)	-3	2	0	470	740	34	0.0250879	Cargo B		63.877	67.33	137.167		B2_1	7949
CL8142Contig1	F7DX49_XENTR	LMBL2_HUMAN	Lethal(3)malignant brain tumor-like protein 2 (H-l(3)mbt-like protein 2) (L(3)mbt-like protein 2)	3	0	5.6	470	740	34	0.0250879	Cargo B		85.483	69.812	79.11		B2_1	8006
dsrrswapns_comp217732_c1_seq1	F7AQ54_XENTR			-3	12	0	470	740	34	0.0250879	Cargo B		5.421				B2_1	9864
TC449596	B1H1P1_XENLA	MPP10_HUMAN	U3 small nucleolar ribonucleoprotein protein MPP10 (M phase phosphoprotein 10)	3	0	290	470	740	33	0.0250879	Cargo B		13.698	70.831	78.864		B2_1	10671
CL12532Contig1		UXT_HUMAN	Protein UXT (Androgen receptor trapped clone 27 protein) (ART-27) (Ubiquitously expressed transcript protein)	-3	21	0	450	740	32	0.0250879	Cargo B		16.977	482.008	18.246		B2_1	1090
CL8101Contig1	Q4V7X6_XENLA	GPAM1_HUMAN	GPALPP motifs-containing protein 1 (Lipopolysaccharide-specific response protein 7)	3	0	280	450	740	32	0.0250879	Cargo B		37.944	37.945	38.142		B2_1	7996
CL10248Contig2	Q6GQZ0_XENLA	MET15_HUMAN	Probable methyltransferase-like protein 15 (EC 2.1.1.-) (Methyltransferase 5 domain-containing protein 1)				440	740	31	0.0250879	Cargo B		41.278	518.209	46.121		B2_1	272
CL3958Contig2	A1A5J1_XENLA	P2R3B_HUMAN	Serine/threonine-protein phosphatase 2A regulatory subunit B'' subunit beta (PP2A subunit B isoform PR48) (Protein phosphatase 2A 48 kDa regulatory subunit)	-3	15	0	440	740	31	0.0250879	Cargo B		61.598	65.399	65.061		B2_1	5191
CL40032Contig1				0.693104	12	59	430	740	31	0.0250879	Cargo B		29.189				B2_1	5257
CL2124Contig4	F6ZAF5_XENTR	SC24B_HUMAN	Protein transport protein Sec24B (SEC24-related protein B)	-3	9.8	0	420	740	30	0.0250879	Cargo B		120.93	123.522	137.418		B2_1	3087
zeinaSSns_comp384161_c0_seq1	Q6INR4_XENLA	IMP3_HUMAN	U3 small nucleolar ribonucleoprotein protein IMP3 (U3 snoRNP protein IMP3) (BRMS2)	3	0	320	420	740	30	0.0250879	Cargo B		21.742	21.726	21.85		B2_1	4840
CL5703Contig2	Q6GNJ5_XENLA	DOK1_HUMAN	Docking protein 1 (Downstream of tyrosine kinase 1) (p62(dok)) (pp62)	-3	2	0	420	740	30	0.0250879	Cargo B		77.748	64.132	52.392		B2_1	6621
CL7967Contig1	Q5PPS3_XENLA	PEX19_HUMAN	Peroxisomal biogenesis factor 19 (33 kDa housekeeping protein) (Peroxin-19) (Peroxisomal farnesylated protein)	-3	12	0	420	740	30	0.0250879	Cargo B		33.083	31.181	32.807		B2_1	7927
dsrrswapns_comp185512_c0_seq1	A2VDD7_XENLA	ZNHI3_HUMAN	Zinc finger HIT domain-containing protein 3 (HNF-4a coactivator) (Thyroid hormone receptor interactor 3) (Thyroid receptor-interacting protein 3) (TR-interacting protein 3) (TRIP-3)	3	0	250	420	740	30	0.0250879	Cargo B		16.694	16.694	17.607		B2_1	9030
CL33Contig1	RNP1B_XENLA	RNPS1_HUMAN	RNA-binding protein with serine-rich domain 1 (SR-related protein LDC2)	3	0	80	410	740	30	0.0250879	Cargo B		34.349	31.742	34.208		B2_1	4587
dsrrswapns_comp217245_c8_seq5	Q5PPR8_XENLA	RM40_HUMAN	39S ribosomal protein L40, mitochondrial (L40mt) (MRP-L40) (Nuclear localization signal-containing protein deleted in velocardiofacial syndrome) (Up-regulated in metastasis)				410	740	30	0.0250879	Cargo B		23.033	18.331	24.49	MT	B2_1	9796
CL14883Contig1	Q6GQC6_XENLA	RLA2_HUMAN	60S acidic ribosomal protein P2 (Renal carcinoma antigen NY-REN-44)	-2.69	3500	7.3	410	740	29	0.0250879	Cargo B		11.632	11.632	11.665		B2_1	1700
CL853Contig3	Q7ZWW0_XENLA	RBM14_HUMAN	RNA-binding protein 14 (Paraspeckle protein 2) (PSP2) (RNA-binding motif protein 14) (RRM-containing coactivator activator/modulator) (Synaptotagmin-interacting protein) (SYT-interacting protein)	1.93	2.3	200	410	740	29	0.0250879	Cargo B		52.48	58.843	69.492		B2_1	8187
CL11577Contig1	Q641D1_XENLA	DMAP1_HUMAN	DNA methyltransferase 1-associated protein 1 (DNMAP1) (DNMT1-associated protein 1)	2.6	0.2	83	400	740	29	0.0250879	Cargo B		53.171	19.467	52.993		B2_1	765
CL125Contig2	Q7ZYN0_XENLA	RBMS1_HUMAN	RNA-binding motif, single-stranded-interacting protein 1 (Single-stranded DNA-binding protein MSSP-1) (Suppressor of CDC2 with RNA-binding motif 2)				21	740	29	0.0250879	Cargo B		43.842	160.387	44.505		B2_1	1106
CL12341Contig1	A9UM22_XENLA	DECR_HUMAN	2,4-dienoyl-CoA reductase, mitochondrial (EC 1.3.1.34) (2,4-dienoyl-CoA reductase [NADPH]) (4-enoyl-CoA reductase [NADPH]) (Short chain dehydrogenase/reductase family 18C member 1)				400	740	28	0.0250879	Cargo B		36.098	27.942	36.068	MT	B2_1	1033
CL71Contig4	B2GU75_XENTR	SFPQ_HUMAN	Splicing factor, proline- and glutamine-rich (100 kDa DNA-pairing protein) (hPOMp100) (DNA-binding p52/p100 complex, 100 kDa subunit) (Polypyrimidine tract-binding protein-associated-splicing factor) (PSF) (PTB-associated-splicing factor)	1.78	12	750	400	740	28	0.0250879	Cargo B		74.727	53.059	76.149		B2_1	7553
CL21712Contig1	B3DLH8_XENTR			-3	1.1	0	380	740	27	0.0250879	Cargo B		12.177				B2_1	3155
CL70Contig5	Q641G2_XENLA	BORG5_HUMAN	Cdc42 effector protein 1 (Binder of Rho GTPases 5) (Serum protein MSE55)	3	0	0.5	380	740	27	0.0250879	Cargo B		33.173	33.215	40.295		B2_1	7511
CL3379Contig3	C6ZIW0_XENLA	ANC2_HUMAN	Anaphase-promoting complex subunit 2 (APC2) (Cyclosome subunit 2)	-3	41	0	370	740	27	0.0250879	Cargo B		93.34	37.635	93.828		B2_1	4562
CL6320Contig1	CIP2A_XENLA	CIP2A_HUMAN	Protein CIP2A (Cancerous inhibitor of PP2A) (p90 autoantigen)	-3	1.7	0	370	740	27	0.0250879	Cargo B		101.67	101.668	102.185		B2_1	7027
CL10388Contig2	Q4V7I1_XENLA	HAUS4_HUMAN	HAUS augmin-like complex subunit 4	-1.11	11	0.8	360	740	26	0.0250879	Cargo B		41.216	216.224	42.4		B2_1	339
CL12911Contig1	A2VDB7_XENLA	ARP6_HUMAN	Actin-related protein 6 (hArp6) (hARPX)	1.91	1	83	360	740	26	0.0250879	Cargo B		45.514	45.515	45.81		B2_1	1191
CL14984Contig1	F7D0U8_XENTR	CYH2_HUMAN	Cytohesin-2 (ARF exchange factor) (ARF nucleotide-binding site opener) (Protein ARNO) (PH, SEC7 and coiled-coil domain-containing protein 2)	-0.98	5.6	0.6	360	740	26	0.0250879	Cargo B		47.253	46.069	46.546		B2_1	1721
dsrrswapns_comp216495_c1_seq5	Q66J89_XENLA	YTHD3_HUMAN	YTH domain-containing family protein 3	-3	4.8	0	7.5	740	26	0.0250879	Cargo B		60.356	62.753	63.861		B2_1	8457
CL6079Contig1	Q6DCK0_XENLA	TTC31_HUMAN	Tetratricopeptide repeat protein 31 (TPR repeat protein 31)	-1.38	6.9	0.3	350	740	25	0.0250879	Cargo B		69.912	49.75	57.105		B2_1	6888
CL8737Contig1	F7BY88_XENTR	PP13G_HUMAN	Protein phosphatase 1 regulatory subunit 3G	-3	0.2	0	350	740	25	0.0250879	Cargo B		39.427	25.148	38.019		B2_1	8267
CL9670Contig2	Q6NU92_XENLA	WDR48_HUMAN	WD repeat-containing protein 48 (USP1-associated factor 1) (WD repeat endosomal protein) (p80)	1.19	1	15	350	740	25	0.0250879	Cargo B		76.342	46.045	76.21		B2_1	8684
dsrrswapns_comp216181_c2_seq3	SMG8_XENTR	SMG8_HUMAN	Protein SMG8 (Amplified in breast cancer gene 2 protein) (Protein smg-8 homolog)	-3	6.4	0	350	740	25	0.0250879	Cargo B		101.85		109.684		B2_1	9687
CL3865Contig1	Q7ZWM1_XENLA	RPF2_HUMAN	Ribosome production factor 2 homolog (Brix domain-containing protein 1) (Ribosome biogenesis protein RPF2 homolog)	2.02	3.9	410	340	740	24	0.0250879	Cargo B		38.53	35.362	35.583		B2_1	5078
CL4175Contig1	B4F720_XENTR	MKRN1_HUMAN	E3 ubiquitin-protein ligase makorin-1 (EC 6.3.2.-) (RING finger protein 61)	-3	6.5	0	340	740	24	0.0250879	Cargo B		25.023	45.921	53.349		B2_1	5437
CL3374Contig1	F7ADT1_XENTR	DCP1B_HUMAN	mRNA-decapping enzyme 1B (EC 3.-.-.-)	-3	2.3	0	330	740	24	0.0250879	Cargo B		60.822	31.699	67.723		B2_1	4555
CL5076Contig1	Q8QHM0_XENLA	LIMK2_HUMAN	LIM domain kinase 2 (LIMK-2) (EC 2.7.11.1)	-3	0.3	0	330	740	24	0.0250879	Cargo B		63.267	67.476	72.232		B2_1	6161
CL9841Contig1	Q6DDM3_XENLA	PECR_HUMAN	Peroxisomal trans-2-enoyl-CoA reductase (TERP) (EC 1.3.1.38) (2,4-dienoyl-CoA reductase-related protein) (DCR-RP) (HPDHase) (pVI-ARL)				330	740	24	0.0250879	Cargo B		33.403	32.004	32.544		B2_1	8758
CL5771Contig1	A1A5H3_XENTR	SARG_HUMAN	Specifically androgen-regulated gene protein	-3	2.2	0	330	740	23	0.0250879	Cargo B		84.395		63.964		B2_1	6668
CL21758Contig1	F7AT55_XENTR	GCP5_HUMAN	Gamma-tubulin complex component 5 (GCP-5)	-1.64	2.8	0.1	320	740	23	0.0250879	Cargo B		16.512		118.321		B2_1	3159
CL2875Contig2	TGFI1_XENLA	TGFI1_HUMAN	Transforming growth factor beta-1-induced transcript 1 protein (Androgen receptor coactivator 55 kDa protein) (Androgen receptor-associated protein of 55 kDa) (Hydrogen peroxide-inducible clone 5 protein) (Hic-5)				320	740	23	0.0250879	Cargo B		56.015	56.001	49.814		B2_1	4070
dsrrswapns_comp194716_c0_seq2	F7CWL9_XENTR	HAUS3_HUMAN	HAUS augmin-like complex subunit 3	-3	16	0	320	740	23	0.0250879	Cargo B		66.175	68.024	69.65		B2_1	9058
dsrrswapns_comp213935_c3_seq2		R3HCL_HUMAN	Coiled-coil domain-containing protein R3HCC1L (Growth inhibition and differentiation-related protein 88) (Putative mitochondrial space protein 32.1) (R3H and coiled-coil domain-containing protein 1-like)	-3	2.7	0	320	740	23	0.0250879	Cargo B		81.947		87.884		B2_1	9492
CL1578Contig6	F7B167_XENTR	CECR2_HUMAN	Cat eye syndrome critical region protein 2	3	0	4.1	310	740	22	0.0250879	Cargo B		40.291	86.223	164.213		B2_1	1929
CL318Contig8	Q6GPA4_XENLA	PAR6G_HUMAN	Partitioning defective 6 homolog gamma (PAR-6 gamma) (PAR6D)				310	740	22	0.0250879	Cargo B		42.616	42.576	40.883		B2_1	4396
CL4611Contig1	Q08B65_XENLA	TFDP2_HUMAN	Transcription factor Dp-2 (E2F dimerization partner 2)	3	0	56	310	740	22	0.0250879	Cargo B		42.052	42.053	49.236		B2_1	5789
CL6523Contig2	Q7ZWP8_XENLA	TOP3B_HUMAN	DNA topoisomerase 3-beta-1 (EC 5.99.1.2) (DNA topoisomerase III beta-1)	-3	6.5	0	310	740	22	0.0250879	Cargo B		96.544	96.545	96.662		B2_1	7169
zeinaSSns_comp383866_c0_seq1	F6V0I3_XENTR	CEP55_HUMAN	Centrosomal protein of 55 kDa (Cep55) (Up-regulated in colon cancer 6)	-0.79	7.3	1.2	310	740	22	0.0250879	Cargo B		28.351		54.178		B2_1	10963
CL21049Contig1	F7ELL0_XENTR	IRF7_HUMAN	Interferon regulatory factor 7 (IRF-7)				300	740	22	0.0250879	Cargo B		32.825	52.677	54.278		B2_1	3059
CL5201Contig1	B7X613_XENLA	NOG1_HUMAN	Nucleolar GTP-binding protein 1 (Chronic renal failure gene protein) (GTP-binding protein NGB)	1.97	3	280	300	740	22	0.0250879	Cargo B		73.948	73.949	73.964		B2_1	6263
dsrrswapns_comp212511_c4_seq6	F6Y9Y2_XENTR	CNO11_HUMAN	CCR4-NOT transcription complex subunit 11	-3	26	0	300	740	22	0.0250879	Cargo B		49.922		55.215		B2_1	8470
CL387Contig2	Q860P5_XENLA	PRC2A_HUMAN	Protein PRRC2A (HLA-B-associated transcript 2) (Large proline-rich protein BAT2) (Proline-rich and coiled-coil-containing protein 2A) (Protein G2)	-3	9.6	0	310	740	22	0.0103748	Cargo B		223.32	223.319	228.863		B2_1	5097
CL3370Contig2	F6TTY7_XENTR	TB10B_HUMAN	TBC1 domain family member 10B (Rab27A-GAP-beta)	-3	1.5	0	300	740	21	0.0250879	Cargo B		81.35	58.031	87.199		B2_1	4551
CL428Contig2	E3WDQ9_XENLA	PUM2_HUMAN	Pumilio homolog 2 (Pumilio-2)	-3	1.7	0	300	740	21	0.0250879	Cargo B		125.21	127.103	114.216		B2_1	5523
CL1804Contig2	Q6NRJ2_XENLA	RFIP5_HUMAN	Rab11 family-interacting protein 5 (Rab11-FIP5) (Gamma-SNAP-associated factor 1) (Gaf-1) (Phosphoprotein pp75) (Rab11-interacting protein Rip11)	-3	0.5	0	290	740	21	0.0250879	Cargo B		159.49	69.573	70.415		B2_1	2293
zeinaSSns_comp389048_c0_seq1	FOXK2_XENLA	FOXK2_HUMAN	Forkhead box protein K2 (Cellular transcription factor ILF-1) (FOXK1) (Interleukin enhancer-binding factor 1)	3	0	41	290	740	20	0.0250879	Cargo B		71.605	68.969	69.062		B2_1	11237
CL11333Contig1	Q28CP7_XENTR	ANGE1_HUMAN	Protein angel homolog 1	-1.26	2.8	0.2	280	740	20	0.0250879	Cargo B		64.738	110.927	75.276		B2_1	669
CL5318Contig3	Q9I910_XENLA	CRY1_HUMAN	Cryptochrome-1	2.43	1.8	480	280	740	20	0.0250879	Cargo B		60.63	60.631	66.395		B2_1	6352
CL359Contig8	Q5XG02_XENLA	PAI2B_HUMAN	Polyadenylate-binding protein-interacting protein 2B (PABP-interacting protein 2B) (PAIP-2B) (Poly(A)-binding protein-interacting protein 2B)	-1.06	38	3.3	270	740	19	0.0250879	Cargo B		14.432	14.301	14.237		B2_1	4792
CL9650Contig1	Q5FWN6_XENLA	TBC19_HUMAN	TBC1 domain family member 19	-3	20	0	270	740	19	0.0250879	Cargo B		60.169	60.17	60.208		B2_1	8674
CL3781Contig1	F6S8E6_XENTR	CDYL1_HUMAN	Chromodomain Y-like protein (CDY-like) (EC 2.3.1.48)	3	0	35	260	740	19	0.0250879	Cargo B		60.648	39.007	66.482		B2_1	4998
CL8284Contig1	F6SPB0_XENTR	FBX15_HUMAN	F-box only protein 15	-3	1.3	0	260	740	19	0.0250879	Cargo B		61.394		57.258		B2_1	8067
dsrrswapns_comp210718_c1_seq3	Q58E10_XENLA			-0.878952	9.3	1.2	260	740	19	0.0250879	Cargo B		22.222	22.644			B2_1	9286
zeinaSSns_comp386872_c0_seq2	SMU1_XENLA	SMU1_HUMAN	WD40 repeat-containing protein SMU1 (Smu-1 suppressor of mec-8 and unc-52 protein homolog) [Cleaved into: WD40 repeat-containing protein SMU1, N-terminally processed]	3	0	97	260	740	19	0.0250879	Cargo B		57.663	57.623	57.544		B2_1	9587
CL9603Contig1	SIL1_XENLA	SIL1_HUMAN	Nucleotide exchange factor SIL1 (BiP-associated protein) (BAP)				260	730	18	0.0250879	Cargo B		52.292	52.322	52.085	ER	B2_1	8654
dsrrswapns_comp215560_c3_seq2	AUKBA_XENLA	AURKB_HUMAN	Aurora kinase B (EC 2.7.11.1) (Aurora 1) (Aurora- and IPL1-like midbody-associated protein 1) (AIM-1) (Aurora/IPL1-related kinase 2) (ARK-2) (Aurora-related kinase 2) (STK-1) (Serine/threonine-protein kinase 12) (Serine/threonine-protein kinase 5) (Serine/threonine-protein kinase aurora-B)	0.59	12	45	260	730	18	0.0250879	Cargo B		41.721	41.735	39.311		B2_1	9633
CL204Contig2	AGAP1_XENLA	AGAP1_HUMAN	Arf-GAP with GTPase, ANK repeat and PH domain-containing protein 1 (AGAP-1) (Centaurin-gamma-2) (Cnt-g2) (GTP-binding and GTPase-activating protein 1) (GGAP1)	-3	0.1	0	250	720	18	0.0250879	Cargo B		95.106	95.107	94.47		B2_1	2965
CL3127Contig1	Q66J04_XENLA	KPCD1_HUMAN	Serine/threonine-protein kinase D1 (EC 2.7.11.13) (Protein kinase C mu type) (Protein kinase D) (nPKC-D1) (nPKC-mu)	-3	10	0	250	720	18	0.0250879	Cargo B		51.118	71.408	101.704		B2_1	4334
CL3642Contig4	Q4V7V9_XENLA	NUFP1_HUMAN	Nuclear fragile X mental retardation-interacting protein 1 (Nuclear FMRP-interacting protein 1)	1.68	1.6	78	250	710	18	0.0250879	Cargo B		57.98	58.553	56.3		B2_1	4844
CL1388Contig2	GWL_XENLA	GWL_HUMAN	Serine/threonine-protein kinase greatwall (GW) (GWL) (hGWL) (EC 2.7.11.1) (Microtubule-associated serine/threonine-protein kinase-like) (MAST-L)	0.85	3.6	25	240	700	17	0.0250879	Cargo B	NESdbO	98.493	98.683	97.319		B2_1	1472
CL6452Contig2	Q6GPM5_XENLA	NOBOX_HUMAN	Homeobox protein NOBOX	3	0	200	240	690	17	0.0250879	Cargo B		61.568	61.602	73.906		B2_1	7116
CL1918Contig2	ZN326_XENLA	ZN326_HUMAN	DBIRD complex subunit ZNF326 (Zinc finger protein 326) (Zinc finger protein interacting with mRNPs and DBC1)	1.94	4.3	370	240	680	17	0.0250879	Cargo B		55.934	55.935	65.654		B2_1	2505
CL6970Contig1	Q66IM4_XENTR	NICN1_HUMAN	Nicolin-1 (NPCEDRG) (Tubulin polyglutamylase complex subunit 5) (PGs5)	-3	5.8	0	240	680	17	0.0250879	Cargo B		24.939		24.202		B2_1	7416
CL3490Contig4	A9JSS1_XENLA	RING2_HUMAN	E3 ubiquitin-protein ligase RING2 (EC 6.3.2.-) (Huntingtin-interacting protein 2-interacting protein 3) (HIP2-interacting protein 3) (Protein DinG) (RING finger protein 1B) (RING1b) (RING finger protein 2) (RING finger protein BAP-1)	2.22	0.4	70	230	660	17	0.0250879	Cargo B	BioGrid	42.641	37.583	37.655		B2_1	4675
dsrrswapns_comp215802_c2_seq3	F6Y576_XENTR	CRTC1_HUMAN	CREB-regulated transcription coactivator 1 (Mucoepidermoid carcinoma translocated protein 1) (Transducer of regulated cAMP response element-binding protein 1) (TORC-1) (Transducer of CREB protein 1)				230	660	17	0.0250879	Cargo B		62.731	69.349	67.3		B2_1	9659
CL643Contig6	P33MX_XENLA	P33MX_HUMAN	Putative monooxygenase p33MONOX (EC 1.-.-.-) (Brain-derived rescue factor p60MONOX) (Flavin monooxygenase motif-containing protein of 33 kDa)	-3	9.4	0	230	650	16	0.0250879	Cargo B		32.8	32.686	33.247		B2_1	7110
dsrrswapns_comp213210_c0_seq2	WD82A_XENLA	WDR82_HUMAN	WD repeat-containing protein 82 (Protein TMEM113) (Swd2)	1.94	0.8	69	230	650	16	0.0250879	Cargo B		35.161	35.147	35.079		B2_1	8793
dsrrswapns_comp207976_c0_seq2	MF1LB_XENLA	MFR1L_HUMAN	Mitochondrial fission regulator 1-like	-3	11	0	220	640	16	0.0250879	Cargo B		35.635	35.635	31.957		B2_1	9170
CL935Contig2	Q6AZS3_XENLA	KDM6A_HUMAN	Lysine-specific demethylase 6A (EC 1.14.11.-) (Histone demethylase UTX) (Ubiquitously-transcribed TPR protein on the X chromosome) (Ubiquitously-transcribed X chromosome tetratricopeptide repeat protein)	3	0	5.5	220	630	16	0.0250879	Cargo B		160.9	160.387	154.177		B2_1	8563
dsrrswapns_comp211484_c2_seq2	Q63ZP8_XENLA	IRF6_HUMAN	Interferon regulatory factor 6 (IRF-6)	-0.88	3.5	0.5	220	630	16	0.0250879	Cargo B		58.21	58.211	53.13		B2_1	9330
CL2235Contig4	Q5XH43_XENLA	SRS12_HUMAN	Serine/arginine-rich splicing factor 12 (35 kDa SR repressor protein) (SRrp35) (Splicing factor, arginine/serine-rich 13B) (Splicing factor, arginine/serine-rich 19)	3	0	240	220	620	16	0.0250879	Cargo B		29.247	29.247	30.512		B2_1	3243
CL18934Contig1	Q6DDR4_XENLA	FA98B_HUMAN	Protein FAM98B	2.17	1.4	210	220	620	15	0.0250879	Cargo B		41.542	15.015	37.191		B2_1	2458
CL21991Contig1	F6QZV5_XENTR	YJ005_HUMAN	Uncharacterized protein FLJ45252	-3	7.2	0	210	610	15	0.0250879	Cargo B		25.953		37.976		B2_1	3185
CL5129Contig2	TDRD3_XENLA	TDRD3_HUMAN	Tudor domain-containing protein 3	-3	5.7	0	210	610	15	0.0250879	Cargo B		82.962	72.626	73.185		B2_1	6199
TC464213					0	0	210	610	15	0.0250879	Cargo B		66.797				B2_1	10787
CL1752Contig2	A9UM18_XENLA	U3IP2_HUMAN	U3 small nucleolar RNA-interacting protein 2 (RRP9 homolog) (U3 small nucleolar ribonucleoprotein-associated 55 kDa protein) (U3 snoRNP-associated 55 kDa protein) (U3-55K)	3	0	220	210	600	15	0.0250879	Cargo B		51.565	53.143	51.841		B2_1	2209
dsrrswapns_comp215711_c0_seq1	PLK1_XENLA	PLK1_HUMAN	Serine/threonine-protein kinase PLK1 (EC 2.7.11.21) (Polo-like kinase 1) (PLK-1) (Serine/threonine-protein kinase 13) (STPK13)	0	22	22	210	600	15	0.0250879	Cargo B		68.265	68.212	68.255		B2_1	9645
CL7422Contig1	Q6GR42_XENLA	TF2H2_HUMAN	General transcription factor IIH subunit 2 (Basic transcription factor 2 44 kDa subunit) (BTF2 p44) (General transcription factor IIH polypeptide 2) (TFIIH basal transcription factor complex p44 subunit)	3	0	200	210	590	15	0.0250879	Cargo B		44.86	44.847	44.419		B2_1	7653
zeinaSSns_comp378351_c0_seq2	Q6PB24_XENLA	P2R3C_HUMAN	Serine/threonine-protein phosphatase 2A regulatory subunit B'' subunit gamma (Protein phosphatase subunit G5PR) (Rhabdomyosarcoma antigen MU-RMS-40.6A/6C)	-0.61	0.9	0.2	210	590	15	0.0250879	Cargo B		53.954	40.831	53.316		B2_1	10904
zeinaSSns_comp386723_c0_seq1	Q6P7M5_XENTR	NDK7_HUMAN	Nucleoside diphosphate kinase 7 (NDK 7) (NDP kinase 7) (EC 2.7.4.6) (nm23-H7)	-0.73	1.9	0.4	200	570	14	0.0250879	Cargo B		42.422	70.243	42.492		B2_1	11064
CL3821Contig3	A9ULY1_XENLA	LARP6_HUMAN	La-related protein 6 (Acheron) (Achn) (La ribonucleoprotein domain family member 6)	-0.13	9.9	7.3	200	560	14	0.0250879	Cargo B		53.293	53.435	54.737		B2_1	5036
CL5589Contig1	Q7ZXY8_XENLA	ZN622_HUMAN	Zinc finger protein 622 (Zinc finger-like protein 9)	-0.88	38	5	200	560	14	0.0250879	Cargo B		53.743	53.413	54.272		B2_1	6546
CL5920Contig1	Q6DDH4_XENLA	RED_HUMAN	Protein Red (Cytokine IK) (IK factor) (Protein RER)	3	0	72	200	560	14	0.0250879	Cargo B		66.679	60.166	65.602		B2_1	6785
CL874Contig7	Q6AZI1_XENLA	GAB1_HUMAN	GRB2-associated-binding protein 1 (GRB2-associated binder 1) (Growth factor receptor bound protein 2-associated protein 1)	-3	3	0	200	560	14	0.0250879	Cargo B		75.869	76.029	76.616		B2_1	8271
CL2033Contig1	EMC2A_XENLA	EMC2_HUMAN	ER membrane protein complex subunit 2 (Tetratricopeptide repeat protein 35) (TPR repeat protein 35)	0.33	0.9	1.9	190	550	14	0.0250879	Cargo B		34.594	34.594	34.834		B2_1	2947
CL3296Contig1	Q32NG7_XENLA	PICK1_HUMAN	PRKCA-binding protein (Protein interacting with C kinase 1) (Protein kinase C-alpha-binding protein)	-3	14	0	190	550	14	0.0250879	Cargo B		45.809	45.651	46.6		B2_1	4480
CL4563Contig1	Q6PA89_XENLA	YETS4_HUMAN	YEATS domain-containing protein 4 (Glioma-amplified sequence 41) (Gas41) (NuMA-binding protein 1) (NuBI-1) (NuBI1)	3	0	96	190	550	14	0.0250879	Cargo B		26.468	26.468	26.499		B2_1	5746
CL9906Contig1	ASHWN_XENLA	ASHWN_HUMAN	Ashwin	1.59	2.6	99	190	550	14	0.0250879	Cargo B		28.197	24.783	25.858		B2_1	8794
CL10148Contig1	TBD2B_XENTR	TBD2B_HUMAN	TBC1 domain family member 2B				190	540	14	0.0250879	Cargo B		113.1	54.095	109.88		B2_1	238
CL2986Contig2	MK67I_XENLA	MK67I_HUMAN	MKI67 FHA domain-interacting nucleolar phosphoprotein (Nucleolar phosphoprotein Nopp34) (Nucleolar protein interacting with the FHA domain of pKI-67) (hNIFK)	3	0.2	390	190	540	14	0.0250879	Cargo B		32.324	32.324	34.222		B2_1	4174
CL353Contig3	A3KMT4_XENLA	TCF25_HUMAN	Transcription factor 25 (TCF-25) (Nuclear localized protein 1)	-3	9.4	0	190	540	14	0.0250879	Cargo B		77.163	77.164	76.667		B2_1	4735
CL165Contig4	F7AXB9_XENTR	AIM1_HUMAN	Absent in melanoma 1 protein (Beta/gamma crystallin domain-containing protein 1)	-0.44	3.3	1.2	190	540	13	0.0250879	Cargo B		255.24	20.959	188.676		B2_1	2044
CL2130Contig3	Q68FK6_XENLA	ARFG2_HUMAN	ADP-ribosylation factor GTPase-activating protein 2 (ARF GAP 2) (GTPase-activating protein ZNF289) (Zinc finger protein 289)	-3	0.4	0	190	540	13	0.0250879	Cargo B		57.088	57.543	56.72		B2_1	3099
CL8838Contig1	Q6DFG1_XENLA	PXK_HUMAN	PX domain-containing protein kinase-like protein (Modulator of Na,K-ATPase) (MONaKA)				180	510	13	0.0250879	Cargo B		64.872	64.873	64.95		B2_1	8316
CL40Contig12	Q7ZTJ8_XENLA	SRS10_HUMAN	Serine/arginine-rich splicing factor 10 (40 kDa SR-repressor protein) (SRrp40) (FUS-interacting serine-arginine-rich protein 1) (Splicing factor SRp38) (Splicing factor, arginine/serine-rich 13A) (TLS-associated protein with Ser-Arg repeats) (TASR) (TLS-associated protein with SR repeats) (TLS-associated serine-arginine protein) (TLS-associated SR protein)	3	0	100	180	500	13	0.0250879	Cargo B		10.602	30.285	31.301		B2_1	5359
CL10635Contig1	RPA49_XENLA	RPA49_HUMAN	DNA-directed RNA polymerase I subunit RPA49 (RNA polymerase I subunit A49) (DNA-directed RNA polymerase I subunit E) (RNA polymerase I-associated factor 1) (RNA polymerase I-associated factor 53)	3	0	170	170	490	12	0.0250879	Cargo B		47.366	482.008	53.962		B2_1	423
CL24577Contig1	CHM4C_XENLA	CHM4C_HUMAN	Charged multivesicular body protein 4c (Chromatin-modifying protein 4c) (CHMP4c) (SNF7 homolog associated with Alix 3) (SNF7-3) (hSnf7-3) (Vacuolar protein sorting-associated protein 32-3) (Vps32-3) (hVps32-3)	-3	0.8	0	170	490	12	0.0250879	Cargo B		25.516	25.48	26.411		B2_1	3513
CL33Contig7	Q7ZX79_XENLA	NONO_HUMAN	Non-POU domain-containing octamer-binding protein (NonO protein) (54 kDa nuclear RNA- and DNA-binding protein) (55 kDa nuclear protein) (DNA-binding p52/p100 complex, 52 kDa subunit) (NMT55) (p54(nrb)) (p54nrb)	3	0.2	690	170	490	12	0.0250879	Cargo B		53.186	53.187	54.232		B2_1	4590
CL9514Contig1	Q0P3S8_XENLA	METL6_HUMAN	Methyltransferase-like protein 6 (EC 2.1.1.-)				170	490	12	0.0250879	Cargo B		38.594	38.698	33.251		B2_1	8621
CL2360Contig1	Q7ZXF0_XENLA	RCL1_HUMAN	RNA 3'-terminal phosphate cyclase-like protein	2.84	0.3	190	170	480	12	0.0250879	Cargo B		40.955	40.956	40.843		B2_1	3403
dsrrswapns_comp217027_c0_seq6	SMAG1_XENLA	SMAG1_HUMAN	Protein Smaug homolog 1 (Smaug 1) (hSmaug1) (Sterile alpha motif domain-containing protein 4A) (SAM domain-containing protein 4A)	-3	0.2	0	170	480	12	0.0250879	Cargo B		78.695	78.756	79.415		B2_1	4662
CL38121Contig1				-3	2.3	0	170	480	12	0.0250879	Cargo B		43.154				B2_1	5025
CL3955Contig1	A0JPI0_XENLA	HAUS6_HUMAN	HAUS augmin-like complex subunit 6	-3	12	0	170	480	12	0.0250879	Cargo B		68.675	110.711	108.621		B2_1	5186
CL6557Contig1	Q5XGM9_XENLA	AP1S2_HUMAN	AP-1 complex subunit sigma-2 (Adaptor protein complex AP-1 subunit sigma-1B) (Adaptor-related protein complex 1 subunit sigma-1B) (Clathrin assembly protein complex 1 sigma-1B small chain) (Golgi adaptor HA1/AP1 adaptin sigma-1B subunit) (Sigma 1B subunit of AP-1 clathrin) (Sigma-adaptin 1B) (Sigma1B-adaptin)	-3	3.5	0	170	480	12	0.0250879	Cargo B		22.834	18.945	18.615		B2_1	7190
CL1380Contig3	Q8AVJ4_XENLA	NCOA5_HUMAN	Nuclear receptor coactivator 5 (NCoA-5) (Coactivator independent of AF-2) (CIA)	2.77	1.2	680	170	470	12	0.0250879	Cargo B		82.892	69.277	65.536		B2_1	1457
CL3309Contig5	CUE2B_XENLA	CUED2_HUMAN	CUE domain-containing protein 2	-3	1.7	0	170	470	12	0.0250879	Cargo B		30.036	30.036	32.009		B2_1	4501
EB474725	TBB2_XENLA	TBB2A_HUMAN	Tubulin beta-2A chain (Tubulin beta class IIa)	-3	22	0	170	470	12	0.0250879	Cargo B		13.471	49.724	49.907		B2_1	9937
CL3879Contig1	CBPC1_XENLA	CBPC1_HUMAN	Cytosolic carboxypeptidase 1 (EC 3.4.17.-) (ATP/GTP-binding protein 1) (Nervous system nuclear protein induced by axotomy protein 1 homolog)	-3	1.6	0	160	470	12	0.0250879	Cargo B		138.78	138.782	138.448		B2_1	5095
CL11547Contig1	Q5XHF7_XENLA	CO052_HUMAN	Uncharacterized protein C15orf52	-3	1.1	0	160	460	12	0.0250879	Cargo B		56.874	155.98	57.325		B2_1	758
CL13558Contig1	B2GUH0_XENTR	ASTE1_HUMAN	Protein asteroid homolog 1	-3	4.3	0	160	460	12	0.0250879	Cargo B		76.358		77.093		B2_1	1385
CL11059Contig1	A1L2X9_XENLA	ERCC3_HUMAN	TFIIH basal transcription factor complex helicase XPB subunit (EC 3.6.4.12) (Basic transcription factor 2 89 kDa subunit) (BTF2 p89) (DNA excision repair protein ERCC-3) (DNA repair protein complementing XP-B cells) (TFIIH basal transcription factor complex 89 kDa subunit) (TFIIH 89 kDa subunit) (TFIIH p89) (Xeroderma pigmentosum group B-complementing protein)	3	0	170	160	460	11	0.0250879	Cargo B		89.549	45.263	89.278		B2_1	567
CL225Contig4	B1WBJ1_XENTR	TF2H3_HUMAN	General transcription factor IIH subunit 3 (Basic transcription factor 2 34 kDa subunit) (BTF2 p34) (General transcription factor IIH polypeptide 3) (TFIIH basal transcription factor complex p34 subunit)	3	0	120	160	450	11	0.0250879	Cargo B		38.273		34.378		B2_1	3269
CL5393Contig1	Q9DDA7_XENLA	GCP6_HUMAN	Gamma-tubulin complex component 6 (GCP-6)	-3	1.2	0	160	450	11	0.0250879	Cargo B		186.14	184.291	200.498		B2_1	6408
CL10296Contig1	F7CKQ4_XENTR	CCHCR_HUMAN	Coiled-coil alpha-helical rod protein 1 (Alpha-helical coiled-coil rod protein) (Putative gene 8 protein) (Pg8)	-3	1.1	0	150	430	11	0.0250879	Cargo B		86.642	77.838	88.671		B2_1	292
CL6158Contig3	Q91569_XENLA	KPCI_HUMAN	Protein kinase C iota type (EC 2.7.11.13) (Atypical protein kinase C-lambda/iota) (PRKC-lambda/iota) (aPKC-lambda/iota) (nPKC-iota)				150	430	11	0.0250879	Cargo B	NESdbO	67.756	67.461	68.262		B2_1	6931
CL8875Contig1	Q66II2_XENTR	ERCC2_HUMAN	TFIIH basal transcription factor complex helicase XPD subunit (EC 3.6.4.12) (Basic transcription factor 2 80 kDa subunit) (BTF2 p80) (CXPD) (DNA excision repair protein ERCC-2) (DNA repair protein complementing XP-D cells) (TFIIH basal transcription factor complex 80 kDa subunit) (TFIIH 80 kDa subunit) (TFIIH p80) (Xeroderma pigmentosum group D-complementing protein)	2.54	0.4	140	150	430	11	0.0250879	Cargo B		86.802		86.909		B2_1	8330
CL9226Contig1	SLU7_XENLA	SLU7_HUMAN	Pre-mRNA-splicing factor SLU7 (hSlu7)	1.84	1.2	80	150	420	11	0.0250879	Cargo B		67.405	67.405	68.387		B2_1	8497
CL29321Contig1	F7C5D5_XENTR	MTMR2_HUMAN	Myotubularin-related protein 2 (Phosphatidylinositol-3,5-bisphosphate 3-phosphatase) (EC 3.1.3.95) (Phosphatidylinositol-3-phosphate phosphatase) (EC 3.1.3.64)	-3	0.6	0	150	410	10	0.0250879	Cargo B		21.51	69.73	73.381		B2_1	4124
CL2193Contig3	F6QHB8_XENTR	NOA1_HUMAN	Nitric oxide-associated protein 1				140	410	10	0.0250879	Cargo B		78.277		78.458		B2_1	3179
CL36238Contig1				-3	1.1	0	140	400	10	0.0250879	Cargo B		30.52				B2_1	4825
CL7820Contig1	Q6GLV3_XENLA	CCD50_HUMAN	Coiled-coil domain-containing protein 50 (Protein Ymer)				140	400	10	0.0250879	Cargo B		67.169	67.17	35.822		B2_1	7857
CL184Contig4	F6QZV5_XENTR	RBM33_HUMAN	RNA-binding protein 33 (Proline-rich protein 8) (RNA-binding motif protein 33)	1.38	1.3	32	250	390	18	0.0448258	Cargo B		171.95		129.986		B2_1	2367
CL1149Contig1	F6WIE2_XENTR	FYV1_HUMAN	1-phosphatidylinositol 3-phosphate 5-kinase (Phosphatidylinositol 3-phosphate 5-kinase) (EC 2.7.1.150) (FYVE finger-containing phosphoinositide kinase) (PIKfyve) (Phosphatidylinositol 3-phosphate 5-kinase type III) (PIPkin-III) (Type III PIP kinase)	-3	1.1	0	190	390	14	0.0356718	Cargo B		233.17	72.388	237.136		B2_1	730
CL1229Contig1	KD3AB_XENLA	KDM3A_HUMAN	Lysine-specific demethylase 3A (EC 1.14.11.-) (JmjC domain-containing histone demethylation protein 2A) (Jumonji domain-containing protein 1A)	2.13	0.8	100	440	330	32	0.0958725	Cargo B		150.06	83.76	147.341		B2_1	1017
CL16034Contig1	Q0IHQ7_XENTR	M10L1_HUMAN	Putative helicase Mov10l1 (EC 3.6.4.13) (Moloney leukemia virus 10-like protein 1) (MOV10-like protein 1)	-3	5.5	0	60	260	12	0.0487123	Cargo B		130.6	121.959	135.293		B2_1	1964
CL4500Contig2	Q6NTY7_XENLA	UT14A_HUMAN	U3 small nucleolar RNA-associated protein 14 homolog A (Antigen NY-CO-16) (Serologically defined colon cancer antigen 16)	2.9	0.3	200	300	240	21	0.0893631	Cargo B		87.63	87.631	87.978		B2_1	5699
CL5855Contig1	F6WFK8_XENTR	MIPEP_HUMAN	Mitochondrial intermediate peptidase (MIP) (EC 3.4.24.59)				6.5	170	48	0.279417	Cargo B		79.822	77.034	80.641	MT	B2_1	6737
CL11073Contig1	Q68FK7_XENLA	RUFY3_HUMAN	Protein RUFY3 (Rap2-interacting protein x) (RIPx) (Single axon-regulated protein) (Singar)	-3	1.3	0	250	170	18	0.107471	Cargo B		53.021	103.558	52.965		B2_1	573
dsrrswapns_comp217340_c3_seq21	F120A_XENTR	F120A_HUMAN	Constitutive coactivator of PPAR-gamma-like protein 1 (Oxidative stress-associated Src activator) (Protein FAM120A)	-1.58	12	0.3	400	140	29	0.199733	Cargo B		115.07		121.888		B2_1	9807
CL2152Contig1	A1A5J6_XENLA	CDC5L_HUMAN	Cell division cycle 5-like protein (Cdc5-like protein) (Pombe cdc5-related protein)	3	0.5	800	270	140	19	0.138472	Cargo B		91.715	91.716	92.251		B2_1	3130
CL29Contig20	Q9I8S3_XENLA	DDX3Y_HUMAN	ATP-dependent RNA helicase DDX3Y (EC 3.6.4.13) (DEAD box protein 3, Y-chromosomal)	2.26	1.8	320	460	130	33	0.256587	Cargo B		61.488	68.351	73.154		B2_1	4196
CL6180Contig1	F6QLE7_XENTR	WWC2_HUMAN	Protein WWC2 (BH-3-only member B) (WW domain-containing protein 2)	-3	0.8	0	13	130	23	0.172713	Cargo B		132.73	85.121	133.891		B2_1	6950
CL9679Contig1	Q6DIU6_XENTR	IRAK1_HUMAN	Interleukin-1 receptor-associated kinase 1 (IRAK-1) (EC 2.7.11.1)	-3	13	0	490	110	35	0.310813	Cargo B		86.207	75.661	76.537		B2_1	8688
CL942Contig3	CNOT1_XENTR	CNOT1_HUMAN	CCR4-NOT transcription complex subunit 1 (CCR4-associated factor 1) (Negative regulator of transcription subunit 1 homolog) (NOT1H) (hNOT1)	-3	39	0	260	110	19	0.166663	Cargo B		268.15		266.939		B2_1	8593
CL601Contig2	Q5FWU7_XENLA	ZN598_HUMAN	Zinc finger protein 598	-3	8.4	0	350	100	25	0.253122	Cargo B		101.89	99.621	98.637		B2_1	6850
CL4461Contig4	Q4KLW3_XENLA	DJC21_HUMAN	DnaJ homolog subfamily C member 21 (DnaJ homolog subfamily A member 5) (Protein GS3)	-3	16	0	170	100	12	0.117871	Cargo B		62.906	39.831	62.028		B2_1	5662
CL617Contig1	Q4KMW3_XENLA	SMG1_HUMAN	Serine/threonine-protein kinase SMG1 (SMG-1) (hSMG-1) (EC 2.7.11.1) (61E3.4) (Lambda/iota protein kinase C-interacting protein) (Lambda-interacting protein)	-1.76	6.6	0.1	140	100	10	0.0993014	Cargo B		409.38	31.084	410.501		B2_1	6947
CL7014Contig1	Q6IRP5_XENLA	K1C19_HUMAN	Keratin, type I cytoskeletal 19 (Cytokeratin-19) (CK-19) (Keratin-19) (K19)	-0.55	69	19	20	99	380	3.79854	Cargo B		45.336	45.354	44.106		B2_2	7452
CL1327Contig3	DVL2_XENLA	DVL2_HUMAN	Segment polarity protein dishevelled homolog DVL-2 (Dishevelled-2) (DSH homolog 2)	-3	75	0	29	95	550	5.77737	Cargo B		79.347	79.787	78.948		B2_2	1306
CL698Contig6	Q6PA59_XENLA	YTHD1_HUMAN	YTH domain-containing family protein 1 (Dermatomyositis associated with cancer putative autoantigen 1) (DACA-1)	-3	240	0	13	83	1600	18.9349	Cargo B		62.949	61.481	60.874		B2_2	7425
CL4600Contig1	UBP47_XENLA	UBP47_HUMAN	Ubiquitin carboxyl-terminal hydrolase 47 (EC 3.4.19.12) (Deubiquitinating enzyme 47) (Ubiquitin thioesterase 47) (Ubiquitin-specific-processing protease 47)	-3	65	0	23	37	710	19.1722	Cargo B		153.13	153.261	157.311		B2_2	5781
CL1032Contig2	B1H1P6_XENLA	4ET_HUMAN	Eukaryotic translation initiation factor 4E transporter (4E-T) (eIF4E transporter) (Eukaryotic translation initiation factor 4E nuclear import factor 1)	-2	340	3.4	38	29	1400	46.3976	Cargo B	NESdbO	105.56	27.685	108.201		B2_2	311
dsrrswapns_comp209544_c0_seq5	EPABA_XENLA	PABP1_HUMAN	Polyadenylate-binding protein 1 (PABP-1) (Poly(A)-binding protein 1)	-1.55	470	13	42	22	5400	248.49	Cargo B	Thakar	70.793	70.704	70.671		B2_2	9226
CL1137Contig5	F6ZH01_XENTR	CDK12_HUMAN	Cyclin-dependent kinase 12 (EC 2.7.11.22) (EC 2.7.11.23) (Cdc2-related kinase, arginine/serine-rich) (CrkRS) (Cell division cycle 2-related protein kinase 7) (CDC2-related protein kinase 7) (Cell division protein kinase 12) (hCDK12)	1.97	1.4	130	53	370	9.2	0.0250879	Low Abundant Cargo		163.87	52.331	164.155		C_LA_NII	687
CL1979Contig1	F7DJN4_XENTR	GANP_HUMAN	Germinal-center associated nuclear protein (GANP) (80 kDa MCM3-associated protein) (MCM3 acetylating protein) (MCM3AP) (EC 2.3.1.-) (MCM3 acetyltransferase)	1.85	0.3	23	130	340	8.5	0.0250879	Low Abundant Cargo		260.88	36.765	218.405		C_LA_NII	2615
dsrrswapns_comp209061_c3_seq12	Q32NI3_XENLA	HLTF_HUMAN	Helicase-like transcription factor (EC 3.6.4.-) (EC 6.3.2.-) (DNA-binding protein/plasminogen activator inhibitor 1 regulator) (HIP116) (RING finger protein 80) (SWI/SNF-related matrix-associated actin-dependent regulator of chromatin subfamily A member 3) (Sucrose nonfermenting protein 2-like 3)	3	0	55	8.3	99	2.5	0.0250879	Low Abundant Cargo		115.33	112.594	113.929		C_LA_NII	9214
CL9Contig35	Q7ZTJ3_XENLA	ACSL1_HUMAN	Long-chain-fatty-acid--CoA ligase 1 (EC 6.2.1.3) (Acyl-CoA synthetase 1) (ACS1) (Long-chain acyl-CoA synthetase 1) (LACS 1) (Long-chain acyl-CoA synthetase 2) (LACS 2) (Long-chain fatty acid-CoA ligase 2) (Palmitoyl-CoA ligase 1) (Palmitoyl-CoA ligase 2)				4.1	65	1.6	0.0250879	Low Abundant Cargo		78.302	78.303	77.943	TM	C_LA_NII	8839
CL1426Contig2	APC_XENLA	APC_HUMAN	Adenomatous polyposis coli protein (Protein APC) (Deleted in polyposis 2.5)				54	42	1.1	0.0250879	Low Abundant Cargo	NESdbO, BioGrid	311.93	310.882	311.646		C_LA_NII	1578
CL3924Contig1	Q5EAY9_XENLA	SAP18_HUMAN	Histone deacetylase complex subunit SAP18 (18 kDa Sin3-associated polypeptide) (2HOR0202) (Cell growth-inhibiting gene 38 protein) (Sin3-associated polypeptide p18)	3	0	87	140	400	9.9	0.0250879	Low Abundant Cargo		17.541	17.614	17.561		C_LA_OIC	5147
CL6174Contig1	Q569S7_XENLA	RBM34_HUMAN	RNA-binding protein 34 (RNA-binding motif protein 34)	3	0.2	200	140	400	9.9	0.0250879	Low Abundant Cargo		45.815	45.816	48.565		C_LA_OIC	6942
dsrrswapns_comp213232_c5_seq2	AP2M1_XENLA	AP2M1_HUMAN	AP-2 complex subunit mu (AP-2 mu chain) (Adaptin-mu2) (Adaptor protein complex AP-2 subunit mu) (Adaptor-related protein complex 2 subunit mu) (Clathrin assembly protein complex 2 mu medium chain) (Clathrin coat assembly protein AP50) (Clathrin coat-associated protein AP50) (HA2 50 kDa subunit) (Plasma membrane adaptor AP-2 50 kDa protein)	-2.1	150	1.2	140	400	9.9	0.0250879	Low Abundant Cargo		49.684	49.685	49.655		C_LA_OIC	9441
CL4981Contig1	SDA1_XENLA	SDA1_HUMAN	Protein SDA1 homolog (Nucleolar protein 130) (SDA1 domain-containing protein 1) (hSDA)	3	0	89	140	390	9.8	0.0250879	Low Abundant Cargo		80.077	80.077	79.871		C_LA_OIC	6074
zeinaSSns_comp385732_c2_seq3	NAA30_XENLA	NAA30_HUMAN	N-alpha-acetyltransferase 30 (EC 2.3.1.88) (N-acetyltransferase 12) (N-acetyltransferase MAK3 homolog) (NatC catalytic subunit)	-3	2.9	0	140	390	9.7	0.0250879	Low Abundant Cargo		31.046	31.074	39.32		C_LA_OIC	11019
CL1086Contig1	Q6DDU6_XENLA	MK07_HUMAN	Mitogen-activated protein kinase 7 (MAP kinase 7) (MAPK 7) (EC 2.7.11.24) (Big MAP kinase 1) (BMK-1) (Extracellular signal-regulated kinase 5) (ERK-5)	-3	0.8	0	130	380	9.6	0.0250879	Low Abundant Cargo		102.93	110.044	88.386		C_LA_OIC	510
CL523Contig6	Q7ZTM8_XENLA	TRA2B_HUMAN	Transformer-2 protein homolog beta (TRA-2 beta) (TRA2-beta) (hTRA2-beta) (Splicing factor, arginine/serine-rich 10) (Transformer-2 protein homolog B)	3	0	140	130	380	9.6	0.0250879	Low Abundant Cargo		34.33	35.085	33.666		C_LA_OIC	6293
zeinaSSns_comp385617_c0_seq1	Q7T0Y6_XENLA	CR025_HUMAN	Uncharacterized protein C18orf25	1.91	0.9	70	130	380	9.5	0.0250879	Low Abundant Cargo		43.674	43.761	43.324		C_LA_OIC	11018
zeinaSSns_comp387165_c0_seq4	Q6DCW3_XENLA	IKBA_HUMAN	NF-kappa-B inhibitor alpha (I-kappa-B-alpha) (IkB-alpha) (IkappaBalpha) (Major histocompatibility complex enhancer-binding protein MAD3)				130	380	9.5	0.0250879	Low Abundant Cargo	NESdbO	35.944	35.944	35.609		C_LA_OIC	11081
zeinaSSns_comp374316_c1_seq1	Q32NG9_XENLA	PPR1B_HUMAN	Protein phosphatase 1 regulatory subunit 1B (DARPP-32) (Dopamine- and cAMP-regulated neuronal phosphoprotein)				130	380	9.4	0.0250879	Low Abundant Cargo	NESdbO	20.126	29.946	22.963		C_LA_OIC	10882
CL9231Contig1	TBCC1_XENLA	TBCC1_HUMAN	TBCC domain-containing protein 1	-3	2.5	0	130	370	9.4	0.0250879	Low Abundant Cargo		62.653	62.653	63.53		C_LA_OIC	8500
CL435Contig5	Q9W639_XENLA	SMAD4_HUMAN	Mothers against decapentaplegic homolog 4 (MAD homolog 4) (Mothers against DPP homolog 4) (Deletion target in pancreatic carcinoma 4) (SMAD family member 4) (SMAD 4) (Smad4) (hSMAD4)	0.5	4	13	130	370	9.3	0.0250879	Low Abundant Cargo	NESdbO	59.683	59.856	60.439		C_LA_OIC	5586
CL2654Contig2	GNL3_XENLA	GNL3_HUMAN	Guanine nucleotide-binding protein-like 3 (E2-induced gene 3 protein) (Novel nucleolar protein 47) (NNP47) (Nucleolar GTP-binding protein 3) (Nucleostemin)	2.89	0.6	480	130	360	9.1	0.0250879	Low Abundant Cargo		60.942	60.858	61.993		C_LA_OIC	3814
CL3178Contig1	WDR83_XENLA	WDR83_HUMAN	WD repeat domain-containing protein 83 (Mitogen-activated protein kinase organizer 1) (MAPK organizer 1)	3	0	61	130	360	9.1	0.0250879	Low Abundant Cargo		34.175	34.176	34.343		C_LA_OIC	4386
dsrrswapns_comp215520_c1_seq1	NFKB2_XENLA	NFKB2_HUMAN	Nuclear factor NF-kappa-B p100 subunit (DNA-binding factor KBF2) (H2TF1) (Lymphocyte translocation chromosome 10 protein) (Nuclear factor of kappa light polypeptide gene enhancer in B-cells 2) (Oncogene Lyt-10) (Lyt10) [Cleaved into: Nuclear factor NF-kappa-B p52 subunit]	3	0	0.1	130	360	9.1	0.0250879	Low Abundant Cargo	NESdbO	79.571	105.854	96.749		C_LA_OIC	9625
zeinaSSns_comp385407_c0_seq1	MRM3_XENLA	RMTL1_HUMAN	rRNA methyltransferase 3, mitochondrial (EC 2.1.1.-) (16S rRNA (guanosine(1370)-2'-O)-methyltransferase) (16S rRNA [Gm1370] 2'-O-methyltransferase) (RNA methyltransferase-like protein 1)				120	350	8.8	0.0250879	Low Abundant Cargo		22.344	46.44	47.02	MT	C_LA_OIC	6092
dsrrswapns_comp195681_c1_seq1		NOL7_HUMAN	Nucleolar protein 7 (Nucleolar protein of 27 kDa)	3	0	200	120	350	8.8	0.0250879	Low Abundant Cargo		25.78		29.426		C_LA_OIC	9061
CL4612Contig2	B3DLM0_XENLA	ACSL4_HUMAN	Long-chain-fatty-acid--CoA ligase 4 (EC 6.2.1.3) (Long-chain acyl-CoA synthetase 4) (LACS 4)				120	350	8.7	0.0250879	Low Abundant Cargo		74.499	74.268	79.188	TM	C_LA_OIC	5792
CL2583Contig1	A0JPG3_XENLA	EMIL2_HUMAN	EMILIN-2 (Elastin microfibril interface-located protein 2) (Elastin microfibril interfacer 2) (Protein FOAP-10)				120	340	8.6	0.0250879	Low Abundant Cargo		115.83	115.832	115.687	ER	C_LA_OIC	3717
CL1Contig1252	Q5EAU6_XENLA	RPB9_HUMAN	DNA-directed RNA polymerase II subunit RPB9 (RNA polymerase II subunit B9) (DNA-directed RNA polymerase II subunit I) (RNA polymerase II 14.5 kDa subunit) (RPB14.5)	1.58	1.9	73	120	340	8.5	0.0250879	Low Abundant Cargo		14.428	14.428	14.523		C_LA_OIC	2692
CL8027Contig1	Q6PAG5_XENLA	EAF2_HUMAN	ELL-associated factor 2 (Testosterone-regulated apoptosis inducer and tumor suppressor protein)	2.44	0.6	170	120	330	8.4	0.0250879	Low Abundant Cargo		27.406	27.406	28.792		C_LA_OIC	7965
CL2272Contig3	Q6NRE1_XENLA	WDR20_HUMAN	WD repeat-containing protein 20 (Protein DMR)				120	330	8.3	0.0250879	Low Abundant Cargo		63.221	63.221	62.893		C_LA_OIC	3290
CL15517Contig1	F175A_XENLA	F175A_HUMAN	BRCA1-A complex subunit Abraxas (Coiled-coil domain-containing protein 98) (Protein FAM175A)	3	0	33	110	330	8.2	0.0250879	Low Abundant Cargo		45.822	45.823	46.663		C_LA_OIC	1854
CL4113Contig2	Q6INP7_XENLA	GRIP1_HUMAN	Glutamate receptor-interacting protein 1 (GRIP-1)				110	330	8.2	0.0250879	Low Abundant Cargo		114.5	75.495	122.422		C_LA_OIC	5374
dsrrswapns_comp215152_c1_seq4	Q7SYX8_XENLA	SPAT2_HUMAN	Spermatogenesis-associated protein 2 (Spermatogenesis-associated protein PD1)				110	330	8.2	0.0250879	Low Abundant Cargo		59.751	26.871	58.427		C_LA_OIC	9591
CL220Contig8	D6C652_XENLA	YAP1_HUMAN	Transcriptional coactivator YAP1 (Yes-associated protein 1) (Protein yorkie homolog) (Yes-associated protein YAP65 homolog)	0.03	2.4	2.6	110	320	8	0.0250879	Low Abundant Cargo	BioGrid	50.261	50.275	54.462		C_LA_OIC	3205
CL8985Contig1	A1A633_XENLA	RM38_HUMAN	39S ribosomal protein L38, mitochondrial (L38mt) (MRP-L38)				110	300	7.5	0.0250879	Low Abundant Cargo		45.546	41.202	44.597	MT	C_LA_OIC	8374
CL66Contig1	T2EB_XENLA	T2EB_HUMAN	Transcription initiation factor IIE subunit beta (TFIIE-beta) (General transcription factor IIE subunit 2)	3	0	370	100	300	7.4	0.0250879	Low Abundant Cargo		32.624	32.624	33.044		C_LA_OIC	7267
CL11447Contig1	EXD1_XENLA	EXD1_HUMAN	Exonuclease 3'-5' domain-containing protein 1 (Exonuclease 3'-5' domain-like-containing protein 1)	-3	7	0	100	290	7.2	0.0250879	Low Abundant Cargo		54.997	99.014	58.335		C_LA_OIC	710
CL5357Contig2	Q50JE6_XENLA	WRIP1_HUMAN	ATPase WRNIP1 (EC 3.6.1.3) (Werner helicase-interacting protein 1)	2.3	0.4	91	100	290	7.2	0.0250879	Low Abundant Cargo		62.426	62.426	72.133		C_LA_OIC	6374
CL7925Contig1	A2VD54_XENLA	ROGDI_HUMAN	Protein rogdi homolog	-3	0.9	0	100	280	7.1	0.0250879	Low Abundant Cargo		31.561	32.236	32.254		C_LA_OIC	7903
CL1733Contig3	Q2TAS0_XENLA	TJAP1_HUMAN	Tight junction-associated protein 1 (Protein incorporated later into tight junctions) (Tight junction protein 4)	-3	0.2	0	99	280	7.1	0.0250879	Low Abundant Cargo		66.593	66.594	61.821		C_LA_OIC	2175
CL379Contig3	A1L1C3_XENLA	CCD12_HUMAN	Coiled-coil domain-containing protein 12	3	0	310	99	280	7.1	0.0250879	Low Abundant Cargo		20.899	18.282	19.181		C_LA_OIC	5009
CL7036Contig2	B1H1T5_XENLA	HAUS7_HUMAN	HAUS augmin-like complex subunit 7 (26S proteasome-associated UCH37-interacting protein 1) (UCHL5-interacting protein) (X-linked protein STS1769)	-3	3.7	0	99	280	7.1	0.0250879	Low Abundant Cargo		41.549	39.339	40.778		C_LA_OIC	7465
CL7808Contig1	Q6INF9_XENLA	TF2H4_HUMAN	General transcription factor IIH subunit 4 (Basic transcription factor 2 52 kDa subunit) (BTF2 p52) (General transcription factor IIH polypeptide 4) (TFIIH basal transcription factor complex p52 subunit)	3	0	180	99	280	7.1	0.0250879	Low Abundant Cargo		51.913	51.914	52.186		C_LA_OIC	7848
CL24066Contig1	Q9IB10_XENLA	E2F6_HUMAN	Transcription factor E2F6 (E2F-6)	3	0	12	98	280	7	0.0250879	Low Abundant Cargo		29.676	46.417	31.844		C_LA_OIC	3456
CL2994Contig1	Q6NRB6_XENLA	SFSWA_HUMAN	Splicing factor, suppressor of white-apricot homolog (Splicing factor, arginine/serine-rich 8) (Suppressor of white apricot protein homolog)	2.46	0.3	84	98	280	7	0.0250879	Low Abundant Cargo		98.239	99.393	104.822		C_LA_OIC	4182
CL3614Contig4		CQ053_HUMAN	Uncharacterized protein C17orf53	3	0	49	96	270	6.9	0.0250879	Low Abundant Cargo		58.082		69.771		C_LA_OIC	4817
CL43Contig1	CARFA_XENLA	CARF_HUMAN	CDKN2A-interacting protein (Collaborator of ARF)	3	0	29	96	270	6.8	0.0250879	Low Abundant Cargo		44.789	44.79	61.125		C_LA_OIC	5609
CL2068Contig1	Q66JB0_XENLA	DDX17_HUMAN	Probable ATP-dependent RNA helicase DDX17 (EC 3.6.4.13) (DEAD box protein 17) (DEAD box protein p72) (RNA-dependent helicase p72)	3	0	110	94	270	6.7	0.0250879	Low Abundant Cargo		69.019	69.02	80.272		C_LA_OIC	2991
CL18588Contig1		CH037_HUMAN	Protein C8orf37	-3	1.2	0	93	270	6.7	0.0250879	Low Abundant Cargo		22.366		23.381		C_LA_OIC	2386
CL1728Contig2	Q6GQ04_XENLA	CDC27_HUMAN	Cell division cycle protein 27 homolog (Anaphase-promoting complex subunit 3) (APC3) (CDC27 homolog) (CDC27Hs) (H-NUC)	0.21	6.5	11	92	260	6.6	0.0250879	Low Abundant Cargo		92.697	92.381	91.867		C_LA_OIC	2163
CL724Contig2	ZN346_XENTR	ZN346_HUMAN	Zinc finger protein 346 (Just another zinc finger protein)	3	0	110	91	260	6.5	0.0250879	Low Abundant Cargo		52.018	57.974	32.933		C_LA_OIC	7575
dsrrswapns_comp215318_c7_seq8	ARI3A_XENLA	ARI3A_HUMAN	AT-rich interactive domain-containing protein 3A (ARID domain-containing protein 3A) (B-cell regulator of IgH transcription) (Bright) (Dead ringer-like protein 1) (E2F-binding protein 1)	3	0	28	91	260	6.5	0.0250879	Low Abundant Cargo		58.616	58.57	62.889		C_LA_OIC	9603
CL184Contig3	F6QZV5_XENTR	AAK1_HUMAN	AP2-associated protein kinase 1 (EC 2.7.11.1) (Adaptor-associated kinase 1)	-1.63	8	0.2	87	250	6.3	0.0250879	Low Abundant Cargo		98.022	34.889	103.885		C_LA_OIC	2366
dsrrswapns_comp215942_c4_seq17	CHMP7_XENLA	CHMP7_HUMAN	Charged multivesicular body protein 7 (Chromatin-modifying protein 7)	-3	3.3	0	87	250	6.2	0.0250879	Low Abundant Cargo		47.709	47.71	50.911		C_LA_OIC	6131
CL16Contig19	Q5XGX6_XENLA	RRS1_HUMAN	Ribosome biogenesis regulatory protein homolog	1.87	4.8	360	86	250	6.2	0.0250879	Low Abundant Cargo		38.949	38.975	41.193		C_LA_OIC	2108
CL4484Contig2	Q5RJW9_XENLA	PTCD1_HUMAN	Pentatricopeptide repeat-containing protein 1, mitochondrial				86	250	6.2	0.0250879	Low Abundant Cargo		78.187	78.188	78.856		C_LA_OIC	5679
CL7220Contig1	Q7T0Y3_XENLA	SRFB1_HUMAN	Serum response factor-binding protein 1 (SRF-dependent transcription regulation-associated protein) (p49/STRAP)	2.68	0.4	170	86	250	6.2	0.0250879	Low Abundant Cargo		54.506	54.507	48.634		C_LA_OIC	7562
CL189Contig10	TSR1_XENLA	TSR1_HUMAN	Pre-rRNA-processing protein TSR1 homolog	0.96	4.5	41	86	240	6.1	0.0250879	Low Abundant Cargo		94.206	93.61	91.81		C_LA_OIC	2467
CL6376Contig1	B3DLS4_XENLA	NAT10_HUMAN	N-acetyltransferase 10 (EC 2.3.1.-)	2.06	1.9	220	86	240	6.1	0.0250879	Low Abundant Cargo		119.82	65.261	115.73		C_LA_OIC	7068
CL2293Contig6	ZC3HE_XENLA	ZC3HE_HUMAN	Zinc finger CCCH domain-containing protein 14 (Mammalian suppressor of tau pathology-2) (MSUT-2) (Renal carcinoma antigen NY-REN-37)	2.33	0.1	14	83	240	6	0.0250879	Low Abundant Cargo		81.482	79.419	82.876		C_LA_OIC	3313
CL985Contig4	ELYS_XENLA	ELYS_HUMAN	Protein ELYS (Embryonic large molecule derived from yolk sac) (Protein MEL-28) (Putative AT-hook-containing transcription factor 1)	1.47	3.8	110	83	240	5.9	0.0250879	Low Abundant Cargo		268.58	268.445	252.498		C_LA_OIC	8767
CL9985Contig1	Q6GNL5_XENLA	F207A_HUMAN	Protein FAM207A	2.25	0.8	150	82	240	5.9	0.0250879	Low Abundant Cargo		25.972	25.972	25.456		C_LA_OIC	8822
CL10845Contig1	Q6GQI9_XENLA	CNKR2_HUMAN	Connector enhancer of kinase suppressor of ras 2 (Connector enhancer of KSR 2) (CNK homolog protein 2) (CNK2)	-3	0.3	0	81	230	5.8	0.0250879	Low Abundant Cargo		110.69	221.508	117.535		C_LA_OIC	500
CL1371Contig3	C170B_XENLA	C170B_HUMAN	Centrosomal protein of 170 kDa protein B (Centrosomal protein 170B) (Cep170B)	-3	0.1	0	80	230	5.8	0.0250879	Low Abundant Cargo		179.34	179.342	171.688		C_LA_OIC	1430
CL1272Contig7	Q7ZX12_XENLA	TF2H1_HUMAN	General transcription factor IIH subunit 1 (Basic transcription factor 2 62 kDa subunit) (BTF2 p62) (General transcription factor IIH polypeptide 1) (TFIIH basal transcription factor complex p62 subunit)	3	0	140	80	230	5.7	0.0250879	Low Abundant Cargo		62.995	59.928	62.032		C_LA_OIC	1147
CL5354Contig1	F7E820_XENTR	RPGF6_HUMAN	Rap guanine nucleotide exchange factor 6 (PDZ domain-containing guanine nucleotide exchange factor 2) (PDZ-GEF2) (RA-GEF-2)				79	230	5.7	0.0250879	Low Abundant Cargo		131.73	158.672	179.423		C_LA_OIC	6373
CL2Contig20	A1L2K5_XENLA	RBM42_HUMAN	RNA-binding protein 42 (RNA-binding motif protein 42)	2.16	1.7	250	79	220	5.6	0.0250879	Low Abundant Cargo		42.852	42.852	50.414		C_LA_OIC	4200
dsrrswapns_comp210801_c2_seq3	Q641A0_XENLA	OTUD3_HUMAN	OTU domain-containing protein 3 (EC 3.4.19.12)	-3	0.5	0	79	220	5.6	0.0250879	Low Abundant Cargo		46.272	46.394	45.124		C_LA_OIC	6091
CL7186Contig1	B1H130_XENTR	GPTC1_HUMAN	G patch domain-containing protein 1 (Evolutionarily conserved G-patch domain-containing protein)	2.87	0.1	86	79	220	5.6	0.0250879	Low Abundant Cargo		103.59		103.345		C_LA_OIC	7548
CL2375Contig3	Q5PQ75_XENLA	PAK4_HUMAN	Serine/threonine-protein kinase PAK 4 (EC 2.7.11.1) (p21-activated kinase 4) (PAK-4)	-3	4.2	0	78	220	5.6	0.0250879	Low Abundant Cargo	NESdbO	73.794	73.768	64.072		C_LA_OIC	3422
CL6329Contig1	CEP78_XENTR	CEP78_HUMAN	Centrosomal protein of 78 kDa (Cep78)	-3	1.5	0	78	220	5.6	0.0250879	Low Abundant Cargo		83.839		76.396		C_LA_OIC	7031
CL7550Contig2	RCOR2_XENLA	RCOR2_HUMAN	REST corepressor 2	1.31	1.8	37	78	220	5.6	0.0250879	Low Abundant Cargo		56.086	56.086	58.012		C_LA_OIC	7710
CL21507Contig1	Q2T9G1_XENLA	IFIT5_HUMAN	Interferon-induced protein with tetratricopeptide repeats 5 (IFIT-5) (Interferon-induced 58 kDa protein) (Retinoic acid- and interferon-inducible 58 kDa protein) (P58)				77	220	5.5	0.0250879	Low Abundant Cargo		57.419	57.834	55.847		C_LA_OIC	3129
CL2185Contig1	Q4V7M9_XENLA	SUGP2_HUMAN	SURP and G-patch domain-containing protein 2 (Arginine/serine-rich-splicing factor 14) (Splicing factor, arginine/serine-rich 14)	2.84	0.1	84	76	220	5.4	0.0250879	Low Abundant Cargo		109.43	109.434	120.207		C_LA_OIC	3170
CL1368Contig2	F6Z3Q9_XENTR	F120C_HUMAN	Constitutive coactivator of PPAR-gamma-like protein 2 (Protein FAM120C) (Tumor antigen BJ-HCC-21)	-3	2	0	75	210	5.4	0.0250879	Low Abundant Cargo		64.047		120.588		C_LA_OIC	1423
CL7276Contig1	DND1_XENLA	DND1_HUMAN	Dead end protein homolog 1 (RNA-binding motif, single-stranded-interacting protein 4)	-3	2.6	0	75	210	5.4	0.0250879	Low Abundant Cargo		43.491	41.413	38.687		C_LA_OIC	7583
CL2290Contig2	DNJ6A_XENLA	DNJB6_HUMAN	DnaJ homolog subfamily B member 6 (HHDJ1) (Heat shock protein J2) (HSJ-2) (MRJ) (MSJ-1)	1.06	20	230	75	210	5.3	0.0250879	Low Abundant Cargo		37.603	27.782	36.087		C_LA_OIC	3307
CL5406Contig2	B4F6V5_XENTR	RECQ5_HUMAN	ATP-dependent DNA helicase Q5 (EC 3.6.4.12) (DNA helicase, RecQ-like type 5) (RecQ5) (RecQ protein-like 5)	3	0	52	73	210	5.3	0.0250879	Low Abundant Cargo		122.68	73.339	108.858		C_LA_OIC	6419
CL3169Contig3	Q6INR0_XENLA	DDX47_HUMAN	Probable ATP-dependent RNA helicase DDX47 (EC 3.6.4.13) (DEAD box protein 47)	1.49	2.6	80	73	210	5.2	0.0250879	Low Abundant Cargo		50.25	50.25	50.647		C_LA_OIC	4372
CL815Contig2	Q6NR96_XENLA	ESPL1_HUMAN	Separin (EC 3.4.22.49) (Caspase-like protein ESPL1) (Extra spindle poles-like 1 protein) (Separase)	-3	0.1	0	72	210	5.2	0.0250879	Low Abundant Cargo		238.8	210.333	233.175		C_LA_OIC	8015
CL2516Contig2	A2RRX7_XENLA	WDR36_HUMAN	WD repeat-containing protein 36 (T-cell activation WD repeat-containing protein) (TA-WDRP)	1.98	2.2	210	71	200	5.1	0.0250879	Low Abundant Cargo		99.31	98.737	105.322		C_LA_OIC	3603
DC029809	PRP18_XENLA	PRP18_HUMAN	Pre-mRNA-splicing factor 18 (PRP18 homolog) (hPRP18)	2.05	0.5	57	70	200	5	0.0250879	Low Abundant Cargo		17.959	39.711	39.86		C_LA_OIC	8941
dsrrswapns_comp215314_c4_seq7				3	0	1	69	200	5	0.0250879	Low Abundant Cargo		49.162				C_LA_OIC	6275
CL10852Contig1	F6WTJ2_XENTR	SPAT5_HUMAN	Spermatogenesis-associated protein 5 (ATPase family protein 2 homolog) (Spermatogenesis-associated factor protein)	-3	2	0	69	200	4.9	0.0250879	Low Abundant Cargo		95.881	129.417	97.904		C_LA_OIC	505
CL6516Contig2	Q5HZZ3_XENLA	FABD_HUMAN	Malonyl-CoA-acyl carrier protein transacylase, mitochondrial (MCT) (EC 2.3.1.39) (Mitochondrial malonyl CoA:ACP acyltransferase) (Mitochondrial malonyltransferase) ([Acyl-carrier-protein] malonyltransferase)				69	200	4.9	0.0250879	Low Abundant Cargo		41.43	42.878	42.962	MT	C_LA_OIC	7160
CL1891Contig1	Q6NU52_XENLA	DDX56_HUMAN	Probable ATP-dependent RNA helicase DDX56 (EC 3.6.4.13) (ATP-dependent 61 kDa nucleolar RNA helicase) (DEAD box protein 21) (DEAD box protein 56)	2.45	0.6	170	68	200	4.9	0.0250879	Low Abundant Cargo		62.584	62.499	61.59		C_LA_OIC	2453
CL1243Contig1	Q07FY6_XENTR	NUMB_HUMAN	Protein numb homolog (h-Numb) (Protein S171)				67	190	4.8	0.0250879	Low Abundant Cargo		68.886	219.361	70.804		C_LA_OIC	1061
CL1512Contig3	Q6GPS8_XENLA	EBP2_HUMAN	Probable rRNA-processing protein EBP2 (EBNA1-binding protein 2) (Nucleolar protein p40)	1.74	6.1	340	67	190	4.8	0.0250879	Low Abundant Cargo		35.297	35.266	34.852		C_LA_OIC	1767
TC417639	Q2VPG6_XENLA	EWS_HUMAN	RNA-binding protein EWS (EWS oncogene) (Ewing sarcoma breakpoint region 1 protein)	3	0	250	67	190	4.8	0.0250879	Low Abundant Cargo		71.684	70.739	68.478		C_LA_OIC	5358
CL11440Contig1	F6RCZ7_XENTR			3	0	2.1	66	190	4.7	0.0250879	Low Abundant Cargo		50.518	110.189			C_LA_OIC	708
CL351Contig6	Q66IP7_XENLA	SMRD2_HUMAN	SWI/SNF-related matrix-associated actin-dependent regulator of chromatin subfamily D member 2 (60 kDa BRG-1/Brm-associated factor subunit B) (BRG1-associated factor 60B) (BAF60B)	2.92	0.3	250	66	190	4.7	0.0250879	Low Abundant Cargo		55.473	54.105	58.921		C_LA_OIC	4708
CL2966Contig5	Q28EF3_XENTR	SWAHA_HUMAN	Ankyrin repeat domain-containing protein SOWAHA (Ankyrin repeat domain-containing protein 43) (Protein sosondowah homolog A)				65	180	4.6	0.0250879	Low Abundant Cargo		59.158	90.278	57.443	ER	C_LA_OIC	4161
CL7779Contig1	F7EG98_XENTR	NAA35_HUMAN	N-alpha-acetyltransferase 35, NatC auxiliary subunit (Embryonic growth-associated protein homolog) (Protein MAK10 homolog)	-3	34	0	64	180	4.6	0.0250879	Low Abundant Cargo		45.171		83.639		C_LA_OIC	7831
CL20Contig8	A1L3M5_XENLA	LARP4_HUMAN	La-related protein 4 (La ribonucleoprotein domain family member 4)				63	180	4.5	0.0250879	Low Abundant Cargo		84.893	81.494	80.596		C_LA_OIC	3049
CL29Contig4	Q801P9_XENLA	DDX5_HUMAN	Probable ATP-dependent RNA helicase DDX5 (EC 3.6.4.13) (DEAD box protein 5) (RNA helicase p68)	3	0	34	63	180	4.5	0.0250879	Low Abundant Cargo		68.741	68.236	69.148		C_LA_OIC	4198
CL8359Contig1	Q5U521_XENLA	YAED1_HUMAN	Yae1 domain-containing protein 1				63	180	4.5	0.0250879	Low Abundant Cargo		25.368	26.045	25.299		C_LA_OIC	8107
CL15492Contig1	Q7ZXZ5_XENLA	UBP46_HUMAN	Ubiquitin carboxyl-terminal hydrolase 46 (EC 3.4.19.12) (Deubiquitinating enzyme 46) (Ubiquitin thioesterase 46) (Ubiquitin-specific-processing protease 46)	-3	0.2	0	62	180	4.5	0.0250879	Low Abundant Cargo		28.945	28.946	42.442		C_LA_OIC	1846
dsrrswapns_comp215080_c2_seq7	A9JS62_XENLA	ASH2L_HUMAN	Set1/Ash2 histone methyltransferase complex subunit ASH2 (ASH2-like protein)	3	0	38	62	180	4.5	0.0250879	Low Abundant Cargo		61.533	64.539	68.723		C_LA_OIC	9579
zeinaSSns_comp385166_c1_seq3	Q0IH27_XENLA	HM20B_HUMAN	SWI/SNF-related matrix-associated actin-dependent regulator of chromatin subfamily E member 1-related (SMARCE1-related protein) (BRCA2-associated factor 35) (HMG box-containing protein 20B) (HMG domain-containing protein 2) (HMG domain-containing protein HMGX2) (Sox-like transcriptional factor) (Structural DNA-binding protein BRAF35)	3	0	45	62	180	4.5	0.0250879	Low Abundant Cargo		36.768	36.728	35.813		C_LA_OIC	11003
CL10973Contig1	F6YSC8_XENTR	SCAI_HUMAN	Protein SCAI (Suppressor of cancer cell invasion protein)	1.27	1.3	25	61	180	4.4	0.0250879	Low Abundant Cargo		68.899	439.376	70.399	TM	C_LA_OIC	539
dsrrswapns_comp90779_c0_seq1				-3	1.7	0	60	170	4.3	0.0250879	Low Abundant Cargo		13.637				C_LA_OIC	9908
CL40164Contig1	B5DE87_XENTR	P3C2G_HUMAN	Phosphatidylinositol 4-phosphate 3-kinase C2 domain-containing subunit gamma (PI3K-C2-gamma) (PtdIns-3-kinase C2 subunit gamma) (EC 2.7.1.154) (Phosphoinositide 3-kinase-C2-gamma)	-3	0.6	0	59	170	4.2	0.0250879	Low Abundant Cargo		31.248	101.157	165.715		C_LA_OIC	5271
CL87Contig8		ZCH18_HUMAN	Zinc finger CCCH domain-containing protein 18 (Nuclear protein NHN1)	3	0	34	59	170	4.2	0.0250879	Low Abundant Cargo		54.655		106.378		C_LA_OIC	8304
CL4605Contig2	F6UDX8_XENTR	PP4R4_HUMAN	Serine/threonine-protein phosphatase 4 regulatory subunit 4	-3	0.1	0	58	160	4.1	0.0250879	Low Abundant Cargo		99.548	65.428	99.452		C_LA_OIC	5785
CL10407Contig1	F7E7P8_XENTR	MTMR8_HUMAN	Myotubularin-related protein 8 (EC 3.1.3.-)	-3	7.1	0	57	160	4.1	0.0250879	Low Abundant Cargo		73.301	52.015	78.919		C_LA_OIC	345
CL3354Contig1	Q641C2_XENLA	PDLI4_HUMAN	PDZ and LIM domain protein 4 (LIM protein RIL) (Reversion-induced LIM protein)				57	160	4.1	0.0250879	Low Abundant Cargo		40.116	39.566	35.398		C_LA_OIC	4534
CL1677Contig3	F7EUH8_XENTR	RBM27_HUMAN	RNA-binding protein 27 (RNA-binding motif protein 27)	3	0	53	56	160	4	0.0250879	Low Abundant Cargo		112.07	118.877	118.718		C_LA_OIC	2065
CL1Contig1123	B1WBD1_XENLA	TBC30_HUMAN	TBC1 domain family member 30	-3	0.9	0	56	160	4	0.0250879	Low Abundant Cargo		104.83	104.407	102.743		C_LA_OIC	2661
CL25201Contig1	B3DLJ2_XENTR	STAT2_HUMAN	Signal transducer and activator of transcription 2 (p113)	-3	0.2	0	56	160	4	0.0250879	Low Abundant Cargo		89.56	86.497	97.916		C_LA_OIC	3612
CL7Contig20	TFB1M_XENLA	TFB1M_HUMAN	Dimethyladenosine transferase 1, mitochondrial (EC 2.1.1.-) (Mitochondrial 12S rRNA dimethylase 1) (Mitochondrial transcription factor B1) (h-mtTFB) (h-mtTFB1) (hTFB1M) (mtTFB1) (S-adenosylmethionine-6-N', N'-adenosyl(rRNA) dimethyltransferase 1)				56	160	4	0.0250879	Low Abundant Cargo		39.446	39.432	39.543	MT	C_LA_OIC	7947
CL10189Contig1	Q6DKM3_XENLA	WBS22_HUMAN	Probable 18S rRNA (guanine-N(7))-methyltransferase (EC 2.1.1.-) (Bud site selection protein 23 homolog) (Metastasis-related methyltransferase 1) (Williams-Beuren syndrome chromosomal region 22 protein)	2.78	0.5	310	55	160	4	0.0250879	Low Abundant Cargo		31.645	28.743	31.88		C_LA_OIC	256
dsrrswapns_comp212976_c1_seq1	MBTD1_XENLA	MBTD1_HUMAN	MBT domain-containing protein 1	3	0	34	55	160	4	0.0250879	Low Abundant Cargo		68.958	69.812	70.547		C_LA_OIC	6141
CL891Contig4	Q3KPV2_XENLA	APTX_HUMAN	Aprataxin (EC 3.-.-.-) (Forkhead-associated domain histidine triad-like protein) (FHA-HIT)	2.52	0.5	160	55	160	4	0.0250879	Low Abundant Cargo		39.559	39.617	40.74		C_LA_OIC	8350
dsrrswapns_comp215885_c5_seq3	CRTC3_XENLA	CRTC3_HUMAN	CREB-regulated transcription coactivator 3 (Transducer of regulated cAMP response element-binding protein 3) (TORC-3) (Transducer of CREB protein 3)				55	160	4	0.0250879	Low Abundant Cargo		71.897	69.349	66.959		C_LA_OIC	9666
CL689Contig4	CN10A_XENLA	CNO10_HUMAN	CCR4-NOT transcription complex subunit 10	-3	12	0	54	150	3.9	0.0250879	Low Abundant Cargo		83.42	83.421	82.31		C_LA_OIC	7376
CL1306Contig3	A9UL57_XENLA	FBLI1_HUMAN	Filamin-binding LIM protein 1 (FBLP-1) (Migfilin) (Mitogen-inducible 2-interacting protein) (MIG2-interacting protein)				53	150	3.8	0.0250879	Low Abundant Cargo		14.687	42.64	40.67		C_LA_OIC	1243
CL40418Contig1	BIVM_XENLA	BIVM_HUMAN	Basic immunoglobulin-like variable motif-containing protein				53	150	3.8	0.0250879	Low Abundant Cargo		41.223	56.425	56.774		C_LA_OIC	5293
CL5921Contig1	L7N381_XENTR	ECHP_HUMAN	Peroxisomal bifunctional enzyme (PBE) (PBFE) [Includes: Enoyl-CoA hydratase/3,2-trans-enoyl-CoA isomerase (EC 4.2.1.17) (EC 5.3.3.8); 3-hydroxyacyl-CoA dehydrogenase (EC 1.1.1.35)]				53	150	3.8	0.0250879	Low Abundant Cargo		79.356	82.36	79.495		C_LA_OIC	6786
CL11434Contig1	Q6NU24_XENLA	NEK4_HUMAN	Serine/threonine-protein kinase Nek4 (EC 2.7.11.1) (Never in mitosis A-related kinase 4) (NimA-related protein kinase 4) (Serine/threonine-protein kinase 2) (Serine/threonine-protein kinase NRK2)	-3	0.1	0	52	150	3.7	0.0250879	Low Abundant Cargo		88.979	296.888	94.597		C_LA_OIC	706
CL7337Contig2	KLH22_XENTR	KLH22_HUMAN	Kelch-like protein 22	-1.05	0.4	0	52	150	3.7	0.0250879	Low Abundant Cargo		76.107	71.345	71.667		C_LA_OIC	7609
CL2Contig42	Q6NRE5_XENLA	MLXIP_HUMAN	MLX-interacting protein (Class E basic helix-loop-helix protein 36) (bHLHe36) (Transcriptional activator MondoA)	0.01	3.6	3.7	51	150	3.7	0.0250879	Low Abundant Cargo	NESdbO	54.308	60.905	101.185		C_LA_OIC	4207
CL4979Contig1	Q6GMD5_XENLA	NED4L_HUMAN	E3 ubiquitin-protein ligase NEDD4-like (EC 6.3.2.-) (NEDD4.2) (Nedd4-2)	-3	5.5	0	51	150	3.7	0.0250879	Low Abundant Cargo		111.96	111.964	111.932		C_LA_OIC	6067
CL106Contig4	RNF10_XENLA	RNF10_HUMAN	RING finger protein 10	-3	3.4	0	51	140	3.6	0.0250879	Low Abundant Cargo		85.177	57.809	89.927		C_LA_OIC	444
CL10427Contig1	F7C276_XENTR	LRCH3_HUMAN	Leucine-rich repeat and calponin homology domain-containing protein 3				50	140	3.6	0.0250879	Low Abundant Cargo		78.576	402.765	86.083	ER	C_LA_OIC	353
CL1696Contig1	Q32NN1_XENLA	RECQ1_HUMAN	ATP-dependent DNA helicase Q1 (EC 3.6.4.12) (DNA helicase, RecQ-like type 1) (RecQ1) (DNA-dependent ATPase Q1) (RecQ protein-like 1)	2.57	1.1	410	50	140	3.6	0.0250879	Low Abundant Cargo		73.291	73.339	73.457		C_LA_OIC	2098
dsrrswapns_comp213332_c3_seq1	Q52L18_XENLA	WDR3_HUMAN	WD repeat-containing protein 3	2.14	1	140	50	140	3.6	0.0250879	Low Abundant Cargo		105.98	105.965	106.099		C_LA_OIC	8681
CL10316Contig1	Q6DEE3_XENLA	CTNL1_HUMAN	Alpha-catulin (Alpha-catenin-related protein) (ACRP) (Catenin alpha-like protein 1)	-3	0.8	0	49	140	3.5	0.0250879	Low Abundant Cargo		85.662	149.649	81.896		C_LA_OIC	305
CL15366Contig1	Q07G45_XENTR	SNX24_HUMAN	Sorting nexin-24				49	140	3.5	0.0250879	Low Abundant Cargo		19.839	22.55	19.818		C_LA_OIC	1819
CL314Contig6	Q90X96_XENLA	BRCA1_HUMAN	Breast cancer type 1 susceptibility protein (EC 6.3.2.-) (RING finger protein 53)	3	0	22	49	140	3.5	0.0250879	Low Abundant Cargo	NESdbO	176.01	175.705	207.721		C_LA_OIC	4358
CL1848Contig3	MTRAB_XENLA	MTMRA_HUMAN	Myotubularin-related protein 10	-3	1.3	0	48	140	3.4	0.0250879	Low Abundant Cargo		88.057	88.058	88.273		C_LA_OIC	2364
dsrrswapns_comp216866_c2_seq3	MIOB_XENLA	MIO_HUMAN	WD repeat-containing protein mio	-3	0.9	0	48	140	3.4	0.0250879	Low Abundant Cargo		98.583	98.572	98.584		C_LA_OIC	9756
CL5264Contig3	DEPD7_XENLA	DEPD7_HUMAN	DEP domain-containing protein 7 (Protein TR2/D15)	-3	0.7	0	47	140	3.4	0.0250879	Low Abundant Cargo		54.714	59.691	58.31		C_LA_OIC	6312
CL5389Contig1	Q32NR8_XENLA	NDUS2_HUMAN	NADH dehydrogenase [ubiquinone] iron-sulfur protein 2, mitochondrial (EC 1.6.5.3) (EC 1.6.99.3) (Complex I-49kD) (CI-49kD) (NADH-ubiquinone oxidoreductase 49 kDa subunit)				47	130	3.4	0.0250879	Low Abundant Cargo		52.314	52.314	52.546	MT	C_LA_OIC	6402
CL3159Contig2	Q4VT49_XENLA	FANCL_HUMAN	E3 ubiquitin-protein ligase FANCL (EC 6.3.2.-) (Fanconi anemia group L protein) (Fanconi anemia-associated polypeptide of 43 kDa) (FAAP43)	3	0	120	46	130	3.3	0.0250879	Low Abundant Cargo		43.3	42.513	42.905		C_LA_OIC	4363
CL4766Contig1	Q08AW3_XENLA	GNPAT_HUMAN	Dihydroxyacetone phosphate acyltransferase (DAP-AT) (DHAP-AT) (EC 2.3.1.42) (Acyl-CoA:dihydroxyacetonephosphateacyltransferase) (Glycerone-phosphate O-acyltransferase)				46	130	3.3	0.0250879	Low Abundant Cargo		76.83	76.01	77.188		C_LA_OIC	5909
CL672Contig3	B7ZQN0_XENLA	FAK1_HUMAN	Focal adhesion kinase 1 (FADK 1) (EC 2.7.10.2) (Focal adhesion kinase-related nonkinase) (FRNK) (Protein phosphatase 1 regulatory subunit 71) (PPP1R71) (Protein-tyrosine kinase 2) (p125FAK) (pp125FAK)	-3	0.7	0	46	130	3.3	0.0250879	Low Abundant Cargo	NESdbO	119.25	120.401	119.233		C_LA_OIC	7286
CL2195Contig5	A1L2J8_XENLA	NOP2_HUMAN	Probable 28S rRNA (cytosine(4447)-C(5))-methyltransferase (EC 2.1.1.-) (Nucleolar protein 1) (Nucleolar protein 2 homolog) (Proliferating-cell nucleolar antigen p120) (Proliferation-associated nucleolar protein p120)	2.47	0.8	230	45	130	3.2	0.0250879	Low Abundant Cargo		80.974	83.234	89.302		C_LA_OIC	3181
dsrrswapns_comp216486_c0_seq10	F6QNC9_XENTR	EHBP1_HUMAN	EH domain-binding protein 1	-3	0.5	0	45	130	3.2	0.0250879	Low Abundant Cargo		130.47	106.469	140.017		C_LA_OIC	3537
CL366Contig2	B1WB76_XENTR	MTMR5_HUMAN	Myotubularin-related protein 5 (SET-binding factor 1) (Sbf1)	-3	0.3	0	45	130	3.2	0.0250879	Low Abundant Cargo		211.2	210.866	208.315		C_LA_OIC	4886
dsrrswapns_comp217012_c6_seq50	F6PUN7_XENTR	MAP7_HUMAN	Ensconsin (Epithelial microtubule-associated protein of 115 kDa) (E-MAP-115) (Microtubule-associated protein 7) (MAP-7)	-3	19	0	44	130	3.2	0.0250879	Low Abundant Cargo		64.205	46.748	84.052		C_LA_OIC	9772
dsrrswapns_comp213697_c3_seq4	Q6DDI4_XENLA	AP1M2_HUMAN	AP-1 complex subunit mu-2 (AP-mu chain family member mu1B) (Adaptor protein complex AP-1 subunit mu-2) (Adaptor-related protein complex 1 subunit mu-2) (Clathrin assembly protein complex 1 mu-2 medium chain 2) (Golgi adaptor HA1/AP1 adaptin mu-2 subunit) (Mu-adaptin 2) (Mu1B-adaptin)	-3	5.7	0	44	120	3.1	0.0250879	Low Abundant Cargo		48.512	48.564	48.108		C_LA_OIC	9468
CL3690Contig2	F6X904_XENTR	CAMP3_HUMAN	Calmodulin-regulated spectrin-associated protein 3 (Protein Nezha)	0.42	0.2	0.4	43	120	3.1	0.0250879	Low Abundant Cargo		145.74	175.934	134.75		C_LA_OIC	4907
CL7984Contig1	Q3B8I7_XENLA	DIM1_HUMAN	Probable dimethyladenosine transferase (EC 2.1.1.183) (DIM1 dimethyladenosine transferase 1 homolog) (DIM1 dimethyladenosine transferase 1-like) (Probable 18S rRNA (adenine(1779)-N(6)/adenine(1780)-N(6))-dimethyltransferase) (Probable 18S rRNA dimethylase) (Probable S-adenosylmethionine-6-N',N'-adenosyl(rRNA) dimethyltransferase)	2.2	1.2	190	43	120	3.1	0.0250879	Low Abundant Cargo		34.573	34.574	35.236		C_LA_OIC	7933
CL12426Contig1	Q28I56_XENTR	IFT80_HUMAN	Intraflagellar transport protein 80 homolog (WD repeat-containing protein 56)	-1.37	3	0.1	42	120	3	0.0250879	Low Abundant Cargo		87.228	67.478	88.035		C_LA_OIC	1056
CL2260Contig3	Q9W671_XENLA	TTP_HUMAN	Tristetraprolin (TTP) (G0/G1 switch regulatory protein 24) (Growth factor-inducible nuclear protein NUP475) (Protein TIS11A) (TIS11) (Zinc finger protein 36 homolog) (Zfp-36)				42	120	3	0.0250879	Low Abundant Cargo	NESdbO	34.904	34.859	34.003		C_LA_OIC	3271
CL7098Contig2	F7B1Q6_XENTR	ANR54_HUMAN	Ankyrin repeat domain-containing protein 54 (Lyn-interacting ankyrin repeat protein)				40	120	2.9	0.0250879	Low Abundant Cargo	NESdbO	29.056	23.86	32.505		C_LA_OIC	7506
CL37558Contig1	F6XVW2_XENTR				0	0	40	110	2.9	0.0250879	Low Abundant Cargo		23.356				C_LA_OIC	4979
dsrrswapns_comp215165_c1_seq42	F7EDT1_XENTR	LRCH1_HUMAN	Leucine-rich repeat and calponin homology domain-containing protein 1 (Calponin homology domain-containing protein 1) (Neuronal protein 81) (NP81)	-3	0.2	0	40	110	2.9	0.0250879	Low Abundant Cargo		82.123	66.773	80.875		C_LA_OIC	5087
zeinaSSns_comp364246_c0_seq1	IFT57_XENLA	IFT57_HUMAN	Intraflagellar transport protein 57 homolog (Dermal papilla-derived protein 8) (Estrogen-related receptor beta-like protein 1) (HIP1-interacting protein) (MHS4R2)	-3	4.8	0	40	110	2.8	0.0250879	Low Abundant Cargo		47.273	47.274	49.108		C_LA_OIC	10863
dsrrswapns_comp216002_c6_seq14	B1H1T8_XENLA	CENPT_HUMAN	Centromere protein T (CENP-T) (Interphase centromere complex protein 22)	3	0	26	39	110	2.8	0.0250879	Low Abundant Cargo		86.471	86.626	60.423		C_LA_OIC	9671
zeinaSSns_comp389290_c0_seq3	TRI33_XENLA	TRI33_HUMAN	E3 ubiquitin-protein ligase TRIM33 (EC 6.3.2.-) (Ectodermin homolog) (RET-fused gene 7 protein) (Protein Rfg7) (Transcription intermediary factor 1-gamma) (TIF1-gamma) (Tripartite motif-containing protein 33)	3	0	29	38	110	2.7	0.0250879	Low Abundant Cargo		110.67	128.755	122.533		C_LA_OIC	982
CL4213Contig2	A0JM29_XENTR	E9PL24_HUMAN	Myomegalin (Myomegalin/phosphodiesterase 4D interacting protein variant 8)	-3	0.2	0	38	110	2.7	0.0250879	Low Abundant Cargo		84.938		126.95		C_LA_OIC	5465
CL5421Contig1	RUSD4_XENTR	RUSD4_HUMAN	RNA pseudouridylate synthase domain-containing protein 4				38	110	2.7	0.0250879	Low Abundant Cargo		35.2		42.205		C_LA_OIC	6430
dsrrswapns_comp215403_c0_seq7	F7C484_XENTR	F117B_HUMAN	Protein FAM117B (Amyotrophic lateral sclerosis 2 chromosomal region candidate gene 13 protein)				38	110	2.7	0.0250879	Low Abundant Cargo		61.867	54.455	61.968		C_LA_OIC	9610
BJ030053	Q7ZY00_XENLA	DCAF7_HUMAN	DDB1- and CUL4-associated factor 7 (WD repeat-containing protein 68) (WD repeat-containing protein An11 homolog)	3	0	1.9	37	110	2.6	0.0250879	Low Abundant Cargo		18.686	146.451	38.926		C_LA_OIC	63
CL5904Contig1	COIL_XENLA	COIL_HUMAN	Coilin (p80-coilin)	3	0	300	37	110	2.6	0.0250879	Low Abundant Cargo		59.52	59.521	62.608		C_LA_OIC	6774
CL1962Contig1	B7ZQA4_XENLA	NFAC3_HUMAN	Nuclear factor of activated T-cells, cytoplasmic 3 (NF-ATc3) (NFATc3) (NFATx) (T-cell transcription factor NFAT4) (NF-AT4)	-3	0.2	0	36	100	2.6	0.0250879	Low Abundant Cargo		98.039	97.657	115.594		C_LA_OIC	2592
dsrrswapns_comp214954_c2_seq7	Q6NS11_XENLA	WDTC1_HUMAN	WD and tetratricopeptide repeats protein 1	-0.03	3.4	3.2	36	100	2.6	0.0250879	Low Abundant Cargo		74.869	75.403	75.92		C_LA_OIC	3429
CL7435Contig1	Q6GNW5_XENLA	PP6R2_HUMAN	Serine/threonine-protein phosphatase 6 regulatory subunit 2 (SAPS domain family member 2)				35	100	2.5	0.0250879	Low Abundant Cargo		105.2	105.197	104.942		C_LA_OIC	7657
CL7647Contig1	Q6GPE4_XENLA	WDR89_HUMAN	WD repeat-containing protein 89	3	0	9.1	35	100	2.5	0.0250879	Low Abundant Cargo		42.657	42.641	43.215		C_LA_OIC	7768
CL1838Contig5	Q6AZJ7_XENLA	MERL_HUMAN	Merlin (Moesin-ezrin-radixin-like protein) (Neurofibromin-2) (Schwannomerlin) (Schwannomin)				35	99	2.5	0.0250879	Low Abundant Cargo		68.827	68.828	69.69		C_LA_OIC	2348
zeinaSSns_comp381474_c0_seq2	IMPCT_XENLA	IMPCT_HUMAN	Protein IMPACT (Imprinted and ancient gene protein homolog)	-3	1.5	0	35	98	2.5	0.0250879	Low Abundant Cargo		32.392	35.64	36.476		C_LA_OIC	5959
CL1997Contig5	F6X241_XENTR	SNUT2_HUMAN	U4/U6.U5 tri-snRNP-associated protein 2 (Inactive ubiquitin-specific peptidase 39) (SAD1 homolog) (U4/U6.U5 tri-snRNP-associated 65 kDa protein) (65K)	3	0	240	34	97	2.4	0.0250879	Low Abundant Cargo		57.923	59.455	65.381		C_LA_OIC	2639
CL3581Contig3	Q641B0_XENLA	DMD_HUMAN	Dystrophin				34	97	2.4	0.0250879	Low Abundant Cargo	NESdbO	69.936	72.339	426.75		C_LA_OIC	4770
CL245Contig4	Q33DM4_XENLA	RECQ4_HUMAN	ATP-dependent DNA helicase Q4 (EC 3.6.4.12) (DNA helicase, RecQ-like type 4) (RecQ4) (RTS) (RecQ protein-like 4)	2.07	1	120	34	96	2.4	0.0250879	Low Abundant Cargo		168.89	168.896	133.077		C_LA_OIC	3516
CL6662Contig1	A1L1D3_XENTR	TRI37_HUMAN	E3 ubiquitin-protein ligase TRIM37 (EC 6.3.2.-) (Mulibrey nanism protein) (Tripartite motif-containing protein 37)	-3	0.8	0	34	96	2.4	0.0250879	Low Abundant Cargo		113.57		107.906		C_LA_OIC	7246
CL8781Contig1	F7CR04_XENTR	EHMT2_HUMAN	Histone-lysine N-methyltransferase EHMT2 (EC 2.1.1.-) (EC 2.1.1.43) (Euchromatic histone-lysine N-methyltransferase 2) (HLA-B-associated transcript 8) (Histone H3-K9 methyltransferase 3) (H3-K9-HMTase 3) (Lysine N-methyltransferase 1C) (Protein G9a)	3	0	20	33	95	2.4	0.0250879	Low Abundant Cargo		122.2	48.581	132.37		C_LA_OIC	8289
dsrrswapns_comp217916_c0_seq3	Q28EN0_XENTR	SRCAP_HUMAN	Helicase SRCAP (EC 3.6.4.-) (Domino homolog 2) (Snf2-related CBP activator)	1.52	1.5	51	33	95	2.4	0.0250879	Low Abundant Cargo		341.3	122.107	343.555		C_LA_OIC	9895
CL3528Contig1	RBM22_XENLA	RBM22_HUMAN	Pre-mRNA-splicing factor RBM22 (RNA-binding motif protein 22) (Zinc finger CCCH domain-containing protein 16)	2.27	0.8	160	33	93	2.3	0.0250879	Low Abundant Cargo		46.537	46.538	46.896		C_LA_OIC	4717
CL5194Contig1	Q6PA52_XENLA	BRD2_HUMAN	Bromodomain-containing protein 2 (O27.1.1) (Really interesting new gene 3 protein)	3	0	61	33	93	2.3	0.0250879	Low Abundant Cargo		113.26	53.039	88.061		C_LA_OIC	6251
CL8954Contig1	F7B8I6_XENTR	LINES_HUMAN	Protein Lines homolog (Protein Lines homolog 1) (Wnt-signaling molecule Lines homolog 1)	0.1	2.3	2.9	33	93	2.3	0.0250879	Low Abundant Cargo		55.252		85.857		C_LA_OIC	8363
CL172Contig5	QSER1_XENLA	QSER1_HUMAN	Glutamine and serine-rich protein 1	2.48	0.2	57	32	91	2.3	0.0250879	Low Abundant Cargo		182.11	183.336	189.972		C_LA_OIC	2168
CL1839Contig4	Q6DE48_XENLA	RBBP5_HUMAN	Retinoblastoma-binding protein 5 (RBBP-5) (Retinoblastoma-binding protein RBQ-3)	3	0	27	32	91	2.3	0.0250879	Low Abundant Cargo		54.685	55.143	59.153		C_LA_OIC	2349
CL75Contig16	RMI1_XENLA	RMI1_HUMAN	RecQ-mediated genome instability protein 1 (BLM-associated protein of 75 kDa) (BLAP75) (FAAP75)	0.57	8.5	32	32	91	2.3	0.0250879	Low Abundant Cargo		56.601	61.68	70.144		C_LA_OIC	7740
dsrrswapns_comp207840_c6_seq5	Q640I0_XENLA	RBM4B_HUMAN	RNA-binding protein 4B (RNA-binding motif protein 30) (RNA-binding motif protein 4B) (RNA-binding protein 30)	3	0	12	32	91	2.3	0.0250879	Low Abundant Cargo		39.134	38.908	40.15		C_LA_OIC	9164
CL3769Contig2	Q5M7E4_XENLA	UCKL1_HUMAN	Uridine-cytidine kinase-like 1 (EC 2.7.1.48)	-3	5.1	0	32	90	2.3	0.0250879	Low Abundant Cargo		48.006	60.788	61.141		C_LA_OIC	4989
CL2053Contig5	Q7ZXW7_XENLA	CNOT4_HUMAN	CCR4-NOT transcription complex subunit 4 (EC 6.3.2.-) (CCR4-associated factor 4) (E3 ubiquitin-protein ligase CNOT4) (Potential transcriptional repressor NOT4Hp)	-0.06	1.4	1.2	31	90	2.2	0.0250879	Low Abundant Cargo		86.34	78.436	63.51		C_LA_OIC	2974
CL1Contig1667	Q6GN96_XENLA	EP15R_HUMAN	Epidermal growth factor receptor substrate 15-like 1 (Eps15-related protein) (Eps15R)	-2.1	3.1	0	31	89	2.2	0.0250879	Low Abundant Cargo		94.495	93.953	94.255		C_LA_OIC	2751
CL2268Contig1	NCOA2_XENLA	NCOA2_HUMAN	Nuclear receptor coactivator 2 (NCoA-2) (Class E basic helix-loop-helix protein 75) (bHLHe75) (Transcriptional intermediary factor 2) (hTIF2)	3	0	23	31	89	2.2	0.0250879	Low Abundant Cargo		166.44	166.156	159.157		C_LA_OIC	3282
CL2281Contig1	THO4A_XENLA	THOC4_HUMAN	THO complex subunit 4 (Tho4) (Ally of AML-1 and LEF-1) (Aly/REF export factor) (Transcriptional coactivator Aly/REF) (bZIP-enhancing factor BEF)	2.12	0.9	110	31	89	2.2	0.0250879	Low Abundant Cargo		26.999	27.014	26.888		C_LA_OIC	3298
CL3937Contig1	F7DQQ6_XENTR	SOS2_HUMAN	Son of sevenless homolog 2 (SOS-2)	-3	0.1	0	31	89	2.2	0.0250879	Low Abundant Cargo		153.41	53.339	152.979		C_LA_OIC	5164
CL5227Contig1	Q5HZR3_XENLA	KEAP1_HUMAN	Kelch-like ECH-associated protein 1 (Cytosolic inhibitor of Nrf2) (INrf2) (Kelch-like protein 19)				31	89	2.2	0.0250879	Low Abundant Cargo	NESdbO, BioGrid	68.522	68.556	69.666		C_LA_OIC	6277
CL5347Contig1	F6Z2T5_XENTR	ZSWM8_HUMAN	Zinc finger SWIM domain-containing protein 8	-3	0.2	0	31	89	2.2	0.0250879	Low Abundant Cargo		200.44	121.67	197.297		C_LA_OIC	6371
CL9753Contig1	UIMC1_XENTR	UIMC1_HUMAN	BRCA1-A complex subunit RAP80 (Receptor-associated protein 80) (Retinoid X receptor-interacting protein 110) (Ubiquitin interaction motif-containing protein 1)	3	0	20	31	88	2.2	0.0250879	Low Abundant Cargo		88.501		79.727		C_LA_OIC	8723
CL989Contig5	Q63ZQ7_XENLA	FXL19_HUMAN	F-box/LRR-repeat protein 19 (F-box and leucine-rich repeat protein 19)	3	0	64	31	88	2.2	0.0250879	Low Abundant Cargo		68.982	68.667	75.707		C_LA_OIC	8789
CL9131Contig1	Q28GU0_XENTR	LRCH2_HUMAN	Leucine-rich repeat and calponin homology domain-containing protein 2	-3	0.1	0	31	87	2.2	0.0250879	Low Abundant Cargo		83.124	66.773	84.588		C_LA_OIC	8451
CL4485Contig1	Q6NTX1_XENLA	LSG1_HUMAN	Large subunit GTPase 1 homolog (hLsg1) (EC 3.6.1.-)	-3	1.1	0	30	87	2.2	0.0250879	Low Abundant Cargo		101.74	31.162	75.225		C_LA_OIC	5680
CL1544Contig1					0	0	30	86	2.2	0.0250879	Low Abundant Cargo		63.883				C_LA_OIC	1836
CL11993Contig1	BL1S5_XENLA	BL1S5_HUMAN	Biogenesis of lysosome-related organelles complex 1 subunit 5 (BLOC-1 subunit 5) (Protein Muted homolog)	-3	3.2	0	30	85	2.1	0.0250879	Low Abundant Cargo		21.646	164.648	21.609		C_LA_OIC	914
CL9747Contig1	SDE2_XENLA	SDE2_HUMAN	Protein SDE2 homolog	3	0	17	30	85	2.1	0.0250879	Low Abundant Cargo		49.036	49.363	49.742		C_LA_OIC	8717
CL12304Contig1	F7EJY7_XENTR	NFX1_HUMAN	Transcriptional repressor NF-X1 (EC 6.3.2.-) (Nuclear transcription factor, X box-binding protein 1)				29	84	2.1	0.0250879	Low Abundant Cargo		127.21	22.72	124.395		C_LA_OIC	1023
CL132Contig16	Q7T184_XENLA	SALL4_HUMAN	Sal-like protein 4 (Zinc finger protein 797) (Zinc finger protein SALL4)	1.8	3	190	29	84	2.1	0.0250879	Low Abundant Cargo		114.4	113.821	112.231		C_LA_OIC	1317
CL709Contig3	Q6INT2_XENLA	ZN217_HUMAN	Zinc finger protein 217	2.42	0.1	37	29	83	2.1	0.0250879	Low Abundant Cargo		110.82	110.861	115.272		C_LA_OIC	7507
CL4188Contig1	SHAN2_XENLA	SHAN1_HUMAN	SH3 and multiple ankyrin repeat domains protein 1 (Shank1) (Somatostatin receptor-interacting protein) (SSTR-interacting protein) (SSTRIP)				29	82	2.1	0.0250879	Low Abundant Cargo		157.59	141.18	224.959		C_LA_OIC	5443
CL5170Contig1	Q6PCE6_XENLA	TBL3_HUMAN	Transducin beta-like protein 3 (WD repeat-containing protein SAZD)	1.48	6.1	190	28	79	2	0.0250879	Low Abundant Cargo		91.862	91.867	89.035		C_LA_OIC	6236
CL6742Contig2	F6YW88_XENTR	CCM2_HUMAN	Malcavernin (Cerebral cavernous malformations 2 protein)	-3	1.2	0	28	79	2	0.0250879	Low Abundant Cargo		50.651		48.837		C_LA_OIC	7293
CL181Contig7	Q32P34_XENLA	SC16A_HUMAN	Protein transport protein Sec16A (SEC16 homolog A)	-3	2.4	0	27	78	2	0.0250879	Low Abundant Cargo		249.48	172.375	233.517		C_LA_OIC	2312
CL1158Contig2	Q6NRD9_XENLA	SP1_HUMAN	Transcription factor Sp1	3	0	30	27	78	1.9	0.0250879	Low Abundant Cargo		76.403	9.59	80.693		C_LA_OIC	767
CL5766Contig3	F7EFB4_XENTR	IQEC2_HUMAN	IQ motif and SEC7 domain-containing protein 2				27	77	1.9	0.0250879	Low Abundant Cargo		79.237	46.069	161.736		C_LA_OIC	6663
CL2215Contig1	Q7T3S0_XENLA	P2R3A_HUMAN	Serine/threonine-protein phosphatase 2A regulatory subunit B'' subunit alpha (PP2A subunit B isoform PR72/PR130) (PP2A subunit B isoform R3 isoform) (PP2A subunit B isoforms B''-PR72/PR130) (PP2A subunit B isoforms B72/B130) (Serine/threonine-protein phosphatase 2A 72/130 kDa regulatory subunit B)	-3	0.6	0	27	76	1.9	0.0250879	Low Abundant Cargo		126.72	126.718	130.278		C_LA_OIC	3213
CL2915Contig4	Q5XGT7_XENLA	F8W0Q9_HUMAN	Periphilin-1	3	0	54	26	75	1.9	0.0250879	Low Abundant Cargo		48.514	39.166	44.683		C_LA_OIC	4105
CL968Contig3	Q6GNJ7_XENLA	DCP1A_HUMAN	mRNA-decapping enzyme 1A (EC 3.-.-.-) (Smad4-interacting transcriptional co-activator) (Transcription factor SMIF)	-3	0.3	0	26	75	1.9	0.0250879	Low Abundant Cargo		57.825	58.131	63.309		C_LA_OIC	8691
CL7792Contig1	MCM8_XENLA	MCM8_HUMAN	DNA helicase MCM8 (EC 3.6.4.12) (Minichromosome maintenance 8)	3	0	42	26	74	1.9	0.0250879	Low Abundant Cargo		92.299	92.3	93.697		C_LA_OIC	7837
CL4990Contig1	Q6P8D6_XENTR	VRK1_HUMAN	Serine/threonine-protein kinase VRK1 (EC 2.7.11.1) (Vaccinia-related kinase 1)	2.65	1.1	480	26	74	1.8	0.0250879	Low Abundant Cargo		44.767	49.992	45.476		C_LA_OIC	6084
dsrrswapns_comp197290_c0_seq1	Q7ZX55_XENLA	DCA11_HUMAN	DDB1- and CUL4-associated factor 11 (WD repeat-containing protein 23)	0.15	4.9	6.9	26	73	1.8	0.0250879	Low Abundant Cargo		58.654	58.654	61.67		C_LA_OIC	9064
CL5Contig39	Q6NTQ0_XENLA	DDX18_HUMAN	ATP-dependent RNA helicase DDX18 (EC 3.6.4.13) (DEAD box protein 18) (Myc-regulated DEAD box protein) (MrDb)	3	0	190	25	73	1.8	0.0250879	Low Abundant Cargo		72.736	72.247	75.407		C_LA_OIC	6838
CL3714Contig5	B7ZSK3_XENLA	SHRM3_HUMAN	Protein Shroom3 (Shroom-related protein) (hShrmL)	1.71	0	2.1	25	72	1.8	0.0250879	Low Abundant Cargo		159.19	159.193	216.857		C_LA_OIC	4938
dsrrswapns_comp207772_c6_seq4	Q8AXK5_XENLA	TBE_HUMAN	Tubulin epsilon chain (Epsilon-tubulin)	-3	1.8	0	25	72	1.8	0.0250879	Low Abundant Cargo		52.535	52.55	52.932		C_LA_OIC	8373
CL4424Contig3	F7CY76_XENTR	M3K15_HUMAN	Mitogen-activated protein kinase kinase kinase 15 (EC 2.7.11.25) (Apoptosis signal-regulating kinase 3) (MAPK/ERK kinase kinase 15) (MEK kinase 15) (MEKK 15)	-3	19	0	25	71	1.8	0.0250879	Low Abundant Cargo		122.89	31.375	147.437		C_LA_OIC	5631
CL6623Contig1	FRITZ_XENLA	FRITZ_HUMAN	WD repeat-containing and planar cell polarity effector protein fritz homolog (hFRTZ) (Bardet-Biedl syndrome 15 protein) (WD repeat-containing and planar cell polarity effector protein)				25	70	1.8	0.0250879	Low Abundant Cargo		80.248	80.249	85.084		C_LA_OIC	7217
CL7341Contig3	B0JZ46_XENTR			3	0	57	24	70	1.7	0.0250879	Low Abundant Cargo		75.952	58.432			C_LA_OIC	7614
CL1280Contig9	F6PUN7_XENTR	MA7D2_HUMAN	MAP7 domain-containing protein 2	-3	10	0	24	68	1.7	0.0250879	Low Abundant Cargo		68.73	46.748	81.965		C_LA_OIC	1165
CL87Contig15		B4DZ24_HUMAN	cDNA FLJ52876, moderately similar to Homo sapiens conserved nuclear protein NHN1 (NHN1), mRNA	1.45	0.6	17	24	68	1.7	0.0250879	Low Abundant Cargo		96.457		38.979		C_LA_OIC	8301
dsrrswapns_comp217780_c2_seq20	Q68F69_XENLA	SRRM2_HUMAN	Serine/arginine repetitive matrix protein 2 (300 kDa nuclear matrix antigen) (Serine/arginine-rich splicing factor-related nuclear matrix protein of 300 kDa) (SR-related nuclear matrix protein of 300 kDa) (Ser/Arg-related nuclear matrix protein of 300 kDa) (Splicing coactivator subunit SRm300) (Tax-responsive enhancer element-binding protein 803) (TaxREB803)	2.79	0.1	78	24	68	1.7	0.0250879	Low Abundant Cargo		303.27	101.448	299.615		C_LA_OIC	9875
CL41119Contig1	B5DE67_XENTR	ANK3_HUMAN	Ankyrin-3 (ANK-3) (Ankyrin-G)	0.17	4.8	7	23	66	1.6	0.0250879	Low Abundant Cargo		56.709	167.617	480.41		C_LA_OIC	5368
CL3396Contig2	F6R521_XENTR	LONF1_HUMAN	LON peptidase N-terminal domain and RING finger protein 1 (RING finger protein 191)	-3	3.9	0	23	65	1.6	0.0250879	Low Abundant Cargo		68.553		86.725		C_LA_OIC	4580
dsrrswapns_comp211098_c4_seq9	A9JRI7_XENTR	GAK_HUMAN	Cyclin-G-associated kinase (EC 2.7.11.1)	-3	2.8	0	22	64	1.6	0.0250879	Low Abundant Cargo		141.05	47.2	143.191		C_LA_OIC	4246
dsrrswapns_comp210018_c9_seq44	Q5U4X9_XENTR	SC31A_HUMAN	Protein transport protein Sec31A (ABP125) (ABP130) (SEC31-like protein 1) (SEC31-related protein A) (Web1-like protein)	-3	9.9	0	22	64	1.6	0.0250879	Low Abundant Cargo		121.04	132.627	133.015		C_LA_OIC	4982
CL1182Contig2	IRS2B_XENLA	IRS2_HUMAN	Insulin receptor substrate 2 (IRS-2)				22	63	1.6	0.0250879	Low Abundant Cargo		117.92	63.61	137.334		C_LA_OIC	858
CL1298Contig2	A1L3H7_XENLA	PR40A_HUMAN	Pre-mRNA-processing factor 40 homolog A (Fas ligand-associated factor 1) (Formin-binding protein 11) (Formin-binding protein 3) (Huntingtin yeast partner A) (Huntingtin-interacting protein 10) (HIP-10) (Huntingtin-interacting protein A) (Renal carcinoma antigen NY-REN-6)	3	0	280	22	63	1.6	0.0250879	Low Abundant Cargo		105.9	92.738	108.805		C_LA_OIC	1212
CL4324Contig1	Q6PCH0_XENLA	URP2_HUMAN	Fermitin family homolog 3 (Kindlin-3) (MIG2-like protein) (Unc-112-related protein 2)				22	62	1.6	0.0250879	Low Abundant Cargo		74.789	74.79	75.953		C_LA_OIC	5560
CL4810Contig1	K0556_XENLA	K0556_HUMAN	Uncharacterized protein KIAA0556				22	62	1.6	0.0250879	Low Abundant Cargo		181.56	159.672	180.918		C_LA_OIC	5955
CL1Contig821	Q5G8Z4_XENLA			3	0	74	21	60	1.5	0.0250879	Low Abundant Cargo		154.38	154.354			C_LA_OIC	2876
CL2107Contig1	F6U5F0_XENTR	DMXL1_HUMAN	DmX-like protein 1 (X-like 1 protein)	0.17	0.5	0.7	21	60	1.5	0.0250879	Low Abundant Cargo		335.23		337.839		C_LA_OIC	3064
CL3557Contig1	FA83G_XENLA	FA83G_HUMAN	Protein FAM83G (Protein associated with SMAD1)	-3	1	0	21	60	1.5	0.0250879	Low Abundant Cargo		103.91	103.913	90.835		C_LA_OIC	4749
dsrrswapns_comp216746_c1_seq3	F7C251_XENTR	EMSA1_HUMAN	ELM2 and SANT domain-containing protein 1	3	0	13	21	60	1.5	0.0250879	Low Abundant Cargo		119.93		114.989		C_LA_OIC	9738
CL10966Contig1	DDX55_XENLA	DDX55_HUMAN	ATP-dependent RNA helicase DDX55 (EC 3.6.4.13) (DEAD box protein 55)	2.44	0.3	88	21	59	1.5	0.0250879	Low Abundant Cargo		67.559	337.564	68.547		C_LA_OIC	537
CL3592Contig3	CCAR1_XENLA	CCAR1_HUMAN	Cell division cycle and apoptosis regulator protein 1 (Cell cycle and apoptosis regulatory protein 1) (CARP-1) (Death inducer with SAP domain)	3	0	58	21	59	1.5	0.0250879	Low Abundant Cargo		132.5	132.502	132.821		C_LA_OIC	4786
CL1Contig1019	TAOK2_XENLA	TAOK1_HUMAN	Serine/threonine-protein kinase TAO1 (EC 2.7.11.1) (Kinase from chicken homolog B) (hKFC-B) (MARK Kinase) (MARKK) (Prostate-derived sterile 20-like kinase 2) (PSK-2) (PSK2) (Prostate-derived STE20-like kinase 2) (Thousand and one amino acid protein kinase 1) (TAOK1) (hTAOK1)	-3	0.3	0	20	58	1.5	0.0250879	Low Abundant Cargo		118.12	118.12	116.07		C_LA_OIC	2649
CL3529Contig1	F6ZZC8_XENTR	SETX_HUMAN	Probable helicase senataxin (EC 3.6.4.-) (Amyotrophic lateral sclerosis 4 protein) (SEN1 homolog) (Senataxin)	1.21	1.3	21	20	58	1.5	0.0250879	Low Abundant Cargo		284.97	121.959	302.88		C_LA_OIC	4718
CL9234Contig1	Q5EAU4_XENLA	TBD_HUMAN	Tubulin delta chain (Delta-tubulin)	-3	0.2	0	20	58	1.5	0.0250879	Low Abundant Cargo		51.086	51.086	51.034		C_LA_OIC	8502
CL2493Contig1	HIRA_XENLA	HIRA_HUMAN	Protein HIRA (TUP1-like enhancer of split protein 1)	1.84	0.2	12	20	58	1.4	0.0250879	Low Abundant Cargo		116.34	112.04	111.835		C_LA_OIC	3572
CL451Contig4	Q6GP10_XENLA	ZN638_HUMAN	Zinc finger protein 638 (Cutaneous T-cell lymphoma-associated antigen se33-1) (CTCL-associated antigen se33-1) (Nuclear protein 220) (Zinc finger matrin-like protein)	2.57	0.3	94	20	56	1.4	0.0250879	Low Abundant Cargo		253.12	51.941	220.625		C_LA_OIC	5717
CL4788Contig1	Q6P4N3_XENTR	3BP5_HUMAN	SH3 domain-binding protein 5 (SH3BP-5) (SH3 domain-binding protein that preferentially associates with BTK)				20	56	1.4	0.0250879	Low Abundant Cargo		49.358	41.591	50.425		C_LA_OIC	5930
CL5679Contig1	NOC3L_XENLA	NOC3L_HUMAN	Nucleolar complex protein 3 homolog (NOC3 protein homolog) (Factor for adipocyte differentiation 24) (NOC3-like protein) (Nucleolar complex-associated protein 3-like protein)	3	0	46	19	55	1.4	0.0250879	Low Abundant Cargo		91.8	91.81	92.548		C_LA_OIC	6599
CL690Contig8	Q2VPH3_XENLA	RRP1_HUMAN	Ribosomal RNA processing protein 1 homolog A (Novel nuclear protein 1) (NNP-1) (Nucleolar protein Nop52) (RRP1-like protein)	3	0	130	19	55	1.4	0.0250879	Low Abundant Cargo		69.101	69.152	52.839		C_LA_OIC	7388
CL4650Contig2	Q6GMD0_XENLA	ITSN2_HUMAN	Intersectin-2 (SH3 domain-containing protein 1B) (SH3P18) (SH3P18-like WASP-associated protein)	-3	0.9	0	19	54	1.4	0.0250879	Low Abundant Cargo		129.15	131.274	193.461		C_LA_OIC	5826
CL6173Contig3	B1WBC0_XENLA	RFWD2_HUMAN	E3 ubiquitin-protein ligase RFWD2 (EC 6.3.2.-) (Constitutive photomorphogenesis protein 1 homolog) (hCOP1) (RING finger and WD repeat domain protein 2) (RING finger protein 200)	3	0	18	19	54	1.4	0.0250879	Low Abundant Cargo	NESdbO	79.692	81.109	80.474		C_LA_OIC	6941
CL6674Contig2	A1L2V4_XENLA	TTLL1_HUMAN	Probable tubulin polyglutamylase TTLL1 (EC 6.-.-.-) (Tubulin polyglutamylase complex subunit 3) (PGs3) (Tubulin--tyrosine ligase-like protein 1)	-3	1.2	0	19	54	1.4	0.0250879	Low Abundant Cargo		48.98	48.98	48.988		C_LA_OIC	7250
CL112Contig7	F6Q5Z0_XENTR	MPP8_HUMAN	M-phase phosphoprotein 8 (Two hybrid-associated protein 3 with RanBPM) (Twa3)	3	0	21	19	53	1.3	0.0250879	Low Abundant Cargo		93.769	82.165	97.182		C_LA_OIC	661
CL9003Contig1	F7D0C2_XENTR	SRBD1_HUMAN	S1 RNA-binding domain-containing protein 1	3	0	150	19	53	1.3	0.0250879	Low Abundant Cargo		112.77		111.776		C_LA_OIC	8399
CL10501Contig1		BTBDI_HUMAN	BTB/POZ domain-containing protein 18	3	0	6.8	18	52	1.3	0.0250879	Low Abundant Cargo		65.135	173.965	77.931		C_LA_OIC	373
CL5952Contig1					0	0	18	52	1.3	0.0250879	Low Abundant Cargo		137.95				C_LA_OIC	6805
CL8194Contig1	Q4V7U6_XENLA	FIBP_HUMAN	Acidic fibroblast growth factor intracellular-binding protein (aFGF intracellular-binding protein) (FGF-1 intracellular-binding protein)	-2.17	12	0.1	18	51	1.3	0.0250879	Low Abundant Cargo		41.149	41.149	41.878		C_LA_OIC	8032
dsrrswapns_comp217409_c0_seq3	F6VMK2_XENTR	PF21A_HUMAN	PHD finger protein 21A (BHC80a) (BRAF35-HDAC complex protein BHC80)	3	0	22	18	51	1.3	0.0250879	Low Abundant Cargo		74.673	214.688	74.854		C_LA_OIC	9819
CL350Contig1	Q4QQX7_XENLA	ERI1_HUMAN	3'-5' exoribonuclease 1 (EC 3.1.-.-) (3'-5' exonuclease ERI1) (Eri-1 homolog) (Histone mRNA 3'-end-specific exoribonuclease) (Histone mRNA 3'-exonuclease 1) (Protein 3'hExo) (HEXO)				18	50	1.3	0.0250879	Low Abundant Cargo		44.248	40.13	40.064		C_LA_OIC	4693
CL489Contig2	Q52L30_XENLA	ARAP1_HUMAN	Arf-GAP with Rho-GAP domain, ANK repeat and PH domain-containing protein 1 (Centaurin-delta-2) (Cnt-d2)				18	50	1.3	0.0250879	Low Abundant Cargo		132.29	43.519	162.192		C_LA_OIC	6008
CL7536Contig1	F6TZB6_XENTR	KI16B_HUMAN	Kinesin-like protein KIF16B (Sorting nexin-23)	-3	0.2	0	18	50	1.3	0.0250879	Low Abundant Cargo		151.85	168.372	152.011		C_LA_OIC	7704
zeinaSSns_comp385066_c1_seq2	Q6AZV2_XENLA	GCDH_HUMAN	Glutaryl-CoA dehydrogenase, mitochondrial (GCD) (EC 1.3.8.6)				17	49	1.2	0.0250879	Low Abundant Cargo		48.432	48.399	48.127	MT	C_LA_OIC	1264
CL4946Contig3	Q4V7Z8_XENLA	DDX10_HUMAN	Probable ATP-dependent RNA helicase DDX10 (EC 3.6.4.13) (DEAD box protein 10)	3	0	46	17	49	1.2	0.0250879	Low Abundant Cargo		99.505	82.096	100.888		C_LA_OIC	6045
CL5177Contig1	NSUN4_XENLA	NSUN4_HUMAN	5-methylcytosine rRNA methyltransferase NSUN4 (EC 2.1.1.-) (NOL1/NOP2/Sun domain family member 4)				17	49	1.2	0.0250879	Low Abundant Cargo		45.668	46.061	43.089	MT	C_LA_OIC	6238
CL8068Contig1	F7E182_XENTR	BRWD1_HUMAN	Bromodomain and WD repeat-containing protein 1 (WD repeat-containing protein 9)	3	0	8.9	17	49	1.2	0.0250879	Low Abundant Cargo		219.78	45.918	262.936		C_LA_OIC	7983
CL291Contig4	Q802C4_XENLA	BRD7_HUMAN	Bromodomain-containing protein 7 (75 kDa bromodomain protein) (Protein CELTIX-1)	2.02	1.2	120	17	48	1.2	0.0250879	Low Abundant Cargo		71.779	71.78	74.139		C_LA_OIC	4109
CL2937Contig2	IRS1B_XENLA	IRS1_HUMAN	Insulin receptor substrate 1 (IRS-1)	3	0	0.1	17	48	1.2	0.0250879	Low Abundant Cargo		119.06	119.106	131.591		C_LA_OIC	4131
CL62Contig13	A1A5K3_XENLA	CHD7_HUMAN	Chromodomain-helicase-DNA-binding protein 7 (CHD-7) (EC 3.6.4.12) (ATP-dependent helicase CHD7)	1.49	0.5	16	17	48	1.2	0.0250879	Low Abundant Cargo		240.79	203.457	335.927		C_LA_OIC	7008
CL764Contig4	B1H1X7_XENLA	RIOK1_HUMAN	Serine/threonine-protein kinase RIO1 (EC 2.7.11.1) (RIO kinase 1)	-1.76	1.7	0	17	48	1.2	0.0250879	Low Abundant Cargo		63.026	62.505	65.583		C_LA_OIC	7772
dsrrswapns_comp214985_c4_seq3	Q6DF93_XENLA	PKP3_HUMAN	Plakophilin-3	-0.89	1.2	0.2	17	48	1.2	0.0250879	Low Abundant Cargo		91.553	91.926	87.082		C_LA_OIC	8830
dsrrswapns_comp206773_c0_seq1	Q7ZY03_XENLA	MFAP1_HUMAN	Microfibrillar-associated protein 1	3	0	25	17	48	1.2	0.0250879	Low Abundant Cargo		52.11	52.111	51.958		C_LA_OIC	9136
CL3006Contig5	Q6PAA0_XENLA	FUBP3_HUMAN	Far upstream element-binding protein 3 (FUSE-binding protein 3)	-0.91	15	1.8	17	47	1.2	0.0250879	Low Abundant Cargo		59.248	59.222	61.64		C_LA_OIC	4215
CL632Contig3	Q6IRQ2_XENLA	NXF1_HUMAN	Nuclear RNA export factor 1 (Tip-associated protein) (Tip-associating protein) (mRNA export factor TAP)	3	0	65	17	47	1.2	0.0250879	Low Abundant Cargo	BioGrid	72.749	69.854	70.182		C_LA_OIC	7032
zeinaSSns_comp389061_c4_seq2	F6QLC8_XENTR	WIZ_HUMAN	Protein Wiz (Widely-interspaced zinc finger-containing protein) (Zinc finger protein 803)	3	0	13	17	47	1.2	0.0250879	Low Abundant Cargo		103.49		178.674		C_LA_OIC	11240
CL3043Contig2	VEGTB_XENLA	MGAP_HUMAN	MAX gene-associated protein (MAX dimerization protein 5)	3	0	7.2	16	47	1.2	0.0250879	Low Abundant Cargo		336.83	51.963	331.836		C_LA_OIC	4258
CL15Contig2	Q2KHQ3_XENLA	DAXX_HUMAN	Death domain-associated protein 6 (Daxx) (hDaxx) (ETS1-associated protein 1) (EAP1) (Fas death domain-associated protein)	3	0	79	16	46	1.2	0.0250879	Low Abundant Cargo		102.28	102.283	81.373		C_LA_OIC	1955
zeinaSSns_comp389706_c0_seq12	A4IIE3_XENTR	EHMT1_HUMAN	Histone-lysine N-methyltransferase EHMT1 (EC 2.1.1.-) (EC 2.1.1.43) (Euchromatic histone-lysine N-methyltransferase 1) (Eu-HMTase1) (G9a-like protein 1) (GLP) (GLP1) (Histone H3-K9 methyltransferase 5) (H3-K9-HMTase 5) (Lysine N-methyltransferase 1D)	3	0	18	16	46	1.2	0.0250879	Low Abundant Cargo		141.39	48.581	141.466		C_LA_OIC	11310
CL2049Contig1	TAF6_XENLA	TAF6_HUMAN	Transcription initiation factor TFIID subunit 6 (RNA polymerase II TBP-associated factor subunit E) (Transcription initiation factor TFIID 70 kDa subunit) (TAF(II)70) (TAFII-70) (TAFII70) (Transcription initiation factor TFIID 80 kDa subunit) (TAF(II)80) (TAFII-80) (TAFII80)	2.26	0.8	150	16	46	1.1	0.0250879	Low Abundant Cargo		66.857	66.858	72.668		C_LA_OIC	2964
CL6752Contig2	MELK_XENLA	MELK_HUMAN	Maternal embryonic leucine zipper kinase (hMELK) (EC 2.7.11.1) (Protein kinase Eg3) (pEg3 kinase) (Protein kinase PK38) (hPK38) (Tyrosine-protein kinase MELK) (EC 2.7.10.2)	-3	6.2	0	16	45	1.1	0.0250879	Low Abundant Cargo		74.306	74.307	74.642		C_LA_OIC	7299
CL5969Contig1	F7A1J4_XENTR	CP131_HUMAN	Centrosomal protein of 131 kDa (5-azacytidine-induced protein 1) (Pre-acrosome localization protein 1)	-3	0.3	0	15	43	1.1	0.0250879	Low Abundant Cargo		121.14		122.149		C_LA_OIC	6813
CL7267Contig1	F6Q3I4_XENTR	FIG4_HUMAN	Polyphosphoinositide phosphatase (EC 3.1.3.-) (Phosphatidylinositol 3,5-bisphosphate 5-phosphatase) (SAC domain-containing protein 3)	-3	15	0	15	43	1.1	0.0250879	Low Abundant Cargo		103.74	66.957	103.635		C_LA_OIC	7578
CL4233Contig1	Q4V7K2_XENLA	UTP18_HUMAN	U3 small nucleolar RNA-associated protein 18 homolog (WD repeat-containing protein 50)	3	0.1	69	15	42	1.1	0.0250879	Low Abundant Cargo		58.801	58.802	62.004		C_LA_OIC	5479
CL15182Contig1	Q5EAT9_XENLA	SPE39_HUMAN	Spermatogenesis-defective protein 39 homolog (hSPE-39) (VPS33B-interacting protein in apical-basolateral polarity regulator) (VPS33B-interacting protein in polarity and apical restriction)	-0.96	4.2	0.5	14	41	1	0.0250879	Low Abundant Cargo		57.263	57.264	57.005		C_LA_OIC	1783
CL61Contig5	A0A068ENH4_XENLA	FAN1_HUMAN	Fanconi-associated nuclease 1 (EC 3.1.21.-) (EC 3.1.4.1) (FANCD2/FANCI-associated nuclease 1) (hFAN1) (Myotubularin-related protein 15)	3	0	56	14	41	1	0.0250879	Low Abundant Cargo		115.2	115.473	114.225		C_LA_OIC	6965
CL1544Contig2	Q0V9R2_XENTR	K1671_HUMAN	Uncharacterized protein KIAA1671				14	40	1	0.0250879	Low Abundant Cargo		145.36		196.711		C_LA_OIC	1837
CL8110Contig1	Q5PPS6_XENLA	GNL3L_HUMAN	Guanine nucleotide-binding protein-like 3-like protein	1.79	2.3	140	14	40	0.99	0.0250879	Low Abundant Cargo		62.733	63.665	65.573		C_LA_OIC	7998
CL4168Contig1	Q6GN94_XENLA	AAKG1_HUMAN	5'-AMP-activated protein kinase subunit gamma-1 (AMPK gamma1) (AMPK subunit gamma-1) (AMPKg)	-0.33	14	6.7	14	39	0.98	0.0250879	Low Abundant Cargo		34.268	37.782	37.579		C_LA_OIC	5431
CL8347Contig2				3	0	0.68	14	39	0.98	0.0250879	Low Abundant Cargo		55.112				C_LA_OIC	8105
CL11675Contig1	A0AUU1_XENLA	MLH1_HUMAN	DNA mismatch repair protein Mlh1 (MutL protein homolog 1)	2.53	0.3	100	14	39	0.97	0.0250879	Low Abundant Cargo	NESdbO	84.139	108.933	84.601		C_LA_OIC	797
CL1639Contig3	B5DFT5_XENTR	TENS1_HUMAN	Tensin-1				14	39	0.97	0.0250879	Low Abundant Cargo		174.31	47.2	185.701		C_LA_OIC	2017
dsrrswapns_comp198837_c0_seq7	A0A068ER06_XENLA	MUS81_HUMAN	Crossover junction endonuclease MUS81 (EC 3.1.22.-)	-0.39	18	7.5	13	38	0.96	0.0250879	Low Abundant Cargo		66.768	69.117	61.173		C_LA_OIC	6176
CL6420Contig1	SMC6_XENLA	SMC6_HUMAN	Structural maintenance of chromosomes protein 6 (SMC protein 6) (SMC-6) (hSMC6)	1.76	1.2	72	13	38	0.96	0.0250879	Low Abundant Cargo		130.51	130.513	126.326		C_LA_OIC	7099
CL2901Contig6	Q6DCR8_XENLA	TAF2_HUMAN	Transcription initiation factor TFIID subunit 2 (150 kDa cofactor of initiator function) (RNA polymerase II TBP-associated factor subunit B) (TBP-associated factor 150 kDa) (Transcription initiation factor TFIID 150 kDa subunit) (TAF(II)150) (TAFII-150) (TAFII150)	2.26	0.1	12	13	38	0.95	0.0250879	Low Abundant Cargo		137.81	68.299	136.971		C_LA_OIC	4097
dsrrswapns_comp217070_c0_seq2	F6RDW8_XENTR	CE350_HUMAN	Centrosome-associated protein 350 (Cep350) (Centrosome-associated protein of 350 kDa)	-3	0.9	0	130	430	9.2	0.0213351	Ambiguous		294.4	168.246	350.93		D	1568
dsrrswapns_comp217527_c0_seq7	Q5XGK4_XENLA	WAPL_HUMAN	Wings apart-like protein homolog (Friend of EBNA2 protein)	1.9	1.1	86	100	190	7.4	0.0399172	Ambiguous		129.96	53.496	132.946		D	9837
CL70Contig10	Q6INT0_XENLA	TOP2A_HUMAN	DNA topoisomerase 2-alpha (EC 5.99.1.3) (DNA topoisomerase II, alpha isozyme)	2.06	5.8	670	130	170	9.5	0.05649	Ambiguous	NESdbO	178.62	178.619	174.385		D	7509
CL2868Contig3	Q7ZYC1_XENLA	SNUT1_HUMAN	U4/U6.U5 tri-snRNP-associated protein 1 (SNU66 homolog) (hSnu66) (Squamous cell carcinoma antigen recognized by T-cells 1) (SART-1) (hSART-1) (U4/U6.U5 tri-snRNP-associated 110 kDa protein) (allergen Hom s 1)	1.88	5	380	120	160	8.4	0.0529183	Ambiguous		87.789	87.79	90.255		D	4065
CL2899Contig4	B3DL68_XENTR	SBP2L_HUMAN	Selenocysteine insertion sequence-binding protein 2-like (SECIS-binding protein 2-like)	-3	1.6	0	63	110	4.5	0.0409026	Ambiguous	NESdbO	119.61		121.776		D	4090
dsrrswapns_comp217768_c1_seq4	F7AUJ0_XENTR	DIP2B_HUMAN	Disco-interacting protein 2 homolog B (DIP2 homolog B)	0.11	1.5	2	58	110	4.2	0.0378501	Ambiguous		171.94		171.492		D	5886
CL1173Contig5	Q5XGX8_XENLA	RHG05_HUMAN	Rho GTPase-activating protein 5 (Rho-type GTPase-activating protein 5) (p190-B)	-3	0.6	0	92	100	6.6	0.0646111	Ambiguous		170.81	174.403	172.46		D	825
CL962Contig4	Q4V7W4_XENLA	ATX2_HUMAN	Ataxin-2 (Spinocerebellar ataxia type 2 protein) (Trinucleotide repeat-containing gene 13 protein)	-3	17	0	340	99	25	0.248124	Ambiguous		117.41	68.37	140.283		D	8663
CL449Contig8	Q6DDH5_XENLA	PAXI1_HUMAN	PAX-interacting protein 1 (PAX transactivation activation domain-interacting protein)	1.44	0.5	15	60	95	4.3	0.0450386	Ambiguous		152.98	151.262	121.341		D	5693
CL1424Contig3	O42263_XENLA	CENPE_HUMAN	Centromere-associated protein E (Centromere protein E) (CENP-E) (Kinesin-related protein CENPE)	1.64	1.5	65	70	92	5	0.0539225	Ambiguous		381.15	339.968	316.415		D	1573
CL3484Contig5		SLIP_HUMAN	Nuclear GTPase SLIP-GC (EC 3.6.1.-) (Speckled-like pattern in the germinal center)	3	0	110	120	91	8.6	0.0945911	Ambiguous		210.14		91.132		D	4669
dsrrswapns_comp217748_c1_seq5	F6QSD7_XENTR	MADD_HUMAN	MAP kinase-activating death domain protein (Differentially expressed in normal and neoplastic cells) (Insulinoma glucagonoma clone 20) (Rab3 GDP/GTP exchange factor)	-3	5.2	0	330	90	24	0.266474	Ambiguous		178.61	210.866	183.303		D	9870
CL7542Contig1	F6S962_XENTR	DEN6A_HUMAN	Protein DENND6A (DENN domain-containing protein 6A)	-3	3.3	0	75	90	5.4	0.0597643	Ambiguous		65.302		69.575		D	7707
CL9567Contig1	Q6GNP1_XENLA	DNAI1_HUMAN	Dynein intermediate chain 1, axonemal (Axonemal dynein intermediate chain 1)	-3	4.5	0	130	87	9	0.103319	Ambiguous		79.587	79.588	79.283		D	8645
CL7551Contig1	Q9IA93_XENLA	MCE1_HUMAN	mRNA-capping enzyme (HCAP1) (HCE) [Includes: Polynucleotide 5'-triphosphatase (EC 3.1.3.33) (mRNA 5'-triphosphatase) (TPase); mRNA guanylyltransferase (EC 2.7.7.50) (GTP--RNA guanylyltransferase) (GTase)]	2.88	0.1	74	460	83	33	0.392745	Ambiguous		68.821	68.822	68.557		D	7711
CL4345Contig2	PATL1_XENLA	PATL1_HUMAN	Protein PAT1 homolog 1 (PAT1-like protein 1) (Protein PAT1 homolog b) (Pat1b) (hPat1b)	-3	10	0	340	81	24	0.295715	Ambiguous	NESdbO	82.774	80.077	86.85		D	5580
CL10728Contig1	F6Z180_XENTR	MAST4_HUMAN	Microtubule-associated serine/threonine-protein kinase 4 (EC 2.7.11.1)	-3	5.7	0	240	81	17	0.211701	Ambiguous		72.532	80.236	284.378		D	454
zeinaSSns_comp387722_c4_seq4	F7DW47_XENTR	KIF1C_HUMAN	Kinesin-like protein KIF1C	-3	0.6	0	54	79	3.9	0.049171	Ambiguous		126.18	215.936	122.947		D	5182
CL3Contig55	A9P535_XENLA	KDM1A_HUMAN	Lysine-specific histone demethylase 1A (EC 1.-.-.-) (BRAF35-HDAC complex protein BHC110) (Flavin-containing amine oxidase domain-containing protein 2)	2.18	0.5	76	330	77	24	0.310745	Ambiguous		91.551	87.698	92.903		D	5255
CL5399Contig1	F6Q4M8_XENTR	SMBP2_HUMAN	DNA-binding protein SMUBP-2 (EC 3.6.4.12) (EC 3.6.4.13) (ATP-dependent helicase IGHMBP2) (Glial factor 1) (GF-1) (Immunoglobulin mu-binding protein 2)	-3	22	0	65	77	4.7	0.0607162	Ambiguous		109.06	121.959	109.149		D	6412
CL11635Contig1	TFP11_XENLA	TFP11_HUMAN	Tuftelin-interacting protein 11 (Septin and tuftelin-interacting protein 1) (STIP-1)	1.68	1.5	72	250	76	18	0.23815	Ambiguous		95.244	59.175	96.82		D	780
CL798Contig4	Q6AX68_XENLA	RPGF2_HUMAN	Rap guanine nucleotide exchange factor 2 (Cyclic nucleotide ras GEF) (CNrasGEF) (Neural RAP guanine nucleotide exchange protein) (nRap GEP) (PDZ domain-containing guanine nucleotide exchange factor 1) (PDZ-GEF1) (RA-GEF-1) (Ras/Rap1-associating GEF-1)	-3	0.4	0	130	72	25	0.35288	Ambiguous		170.74	158.672	167.417		D	7936
CL268Contig3	B5DEC6_XENTR	GCFC2_HUMAN	GC-rich sequence DNA-binding factor 2 (GC-rich sequence DNA-binding factor) (Transcription factor 9) (TCF-9)	1.15	3.2	45	170	72	12	0.165199	Ambiguous		99.08		89.385		D	3860
CL646Contig4	MARF1_XENTR	MARF1_HUMAN	Meiosis arrest female protein 1 (Limkain-b1)	0.59	1.9	7.4	120	72	8.9	0.123242	Ambiguous		161.69		192.859		D	7128
CL1147Contig1	Q6PCI5_XENLA	MTMR3_HUMAN	Myotubularin-related protein 3 (EC 3.1.3.48) (FYVE domain-containing dual specificity protein phosphatase 1) (FYVE-DSP1) (Phosphatidylinositol-3,5-bisphosphate 3-phosphatase) (EC 3.1.3.95) (Phosphatidylinositol-3-phosphate phosphatase) (EC 3.1.3.64) (Zinc finger FYVE domain-containing protein 10)	-3	3.1	0	79	70	5.7	0.0808212	Ambiguous		137.75	425.643	133.619		D	724
CL2472Contig2	E5LG93_XENLA	CE192_HUMAN	Centrosomal protein of 192 kDa (Cep192)	-1.25	42	2.4	470	68	33	0.492537	Ambiguous		288.93	288.97	213.146		D	3530
dsrrswapns_comp216320_c2_seq6	MTUS1_XENLA	MTUS1_HUMAN	Microtubule-associated tumor suppressor 1 (AT2 receptor-binding protein) (Angiotensin-II type 2 receptor-interacting protein) (Mitochondrial tumor suppressor 1)	-3	31	0	300	65	22	0.332666	Ambiguous		147.08	147.067	141.397		D	9707
CL5940Contig1	CWC22_XENLA	CWC22_HUMAN	Pre-mRNA-splicing factor CWC22 homolog (Nucampholin homolog) (fSAPb)	3	0	130	310	64	22	0.342193	Ambiguous		92.718	92.719	105.466		D	6799
dsrrswapns_comp215312_c7_seq1	A1A5K4_XENLA	DIEXF_HUMAN	Digestive organ expansion factor homolog	1.22	3.6	59	91	63	6.5	0.102275	Ambiguous		126.19	88.698	87.055		D	9600
dsrrswapns_comp216790_c1_seq5	Q6DJH9_XENLA	SMG7_HUMAN	Protein SMG7 (EST1-like protein C) (SMG-7 homolog) (hSMG-7)	-3	3	0	84	61	6	0.0997174	Ambiguous		123.39	126.166	127.282		D	9743
CL5210Contig1	Q6GQF0_XENLA	TRAD1_HUMAN	TRAF-type zinc finger domain-containing protein 1 (Protein FLN29)	-0.31	29	14	390	59	28	0.469054	Ambiguous		68.336	68.337	64.841		D	6270
CL3423Contig1	D0EUZ9_XENLA	BCL9_HUMAN	B-cell CLL/lymphoma 9 protein (B-cell lymphoma 9 protein) (Bcl-9) (Protein legless homolog)	1.45	2.3	64	77	58	5.5	0.0951409	Ambiguous		156.65	156.65	149.29		D	4615
CL139Contig9	MKL1_XENLA	MKL1_HUMAN	MKL/myocardin-like protein 1 (Megakaryoblastic leukemia 1 protein) (Megakaryocytic acute leukemia protein) (Myocardin-related transcription factor A) (MRTF-A)	-3	1.3	0	140	57	10	0.17478	Ambiguous		104.21	103.238	98.919		D	1503
CL6391Contig1	Q498F9_XENLA	C19L2_HUMAN	CWF19-like protein 2	1.94	1.6	140	350	56	25	0.451015	Ambiguous		109.39	92.298	103.787		D	7075
CL5186Contig2	F6UNU3_XENTR	CE162_HUMAN	Centrosomal protein of 162 kDa (Cep162) (Protein QN1 homolog)	-3	3.5	0	240	56	17	0.312134	Ambiguous		162.28		161.943		D	6247
CL35Contig20	SLTM_XENLA	SLTM_HUMAN	SAFB-like transcription modulator (Modulator of estrogen-induced transcription)	2.69	0.5	250	130	56	9.4	0.166193	Ambiguous		114.83	113.131	117.148		D	4797
CL360Contig6	B1H1N0_XENLA	PERQ1_HUMAN	PERQ amino acid-rich with GYF domain-containing protein 1 (GRB10-interacting GYF protein 1)	-3	6.3	0	89	55	6.4	0.115894	Ambiguous		111.03	47.093	114.601		D	4811
CL869Contig1	Q6NTJ4_XENLA	TRIPC_HUMAN	E3 ubiquitin-protein ligase TRIP12 (EC 6.3.2.-) (E3 ubiquitin-protein ligase for Arf) (ULF) (Thyroid receptor-interacting protein 12) (TR-interacting protein 12) (TRIP-12)	1.2	4	63	130	54	9.5	0.17666	Ambiguous		222.65	224.423	220.434		D	8251
dsrrswapns_comp217838_c1_seq6	Q6GQL3_XENLA	PRC2C_HUMAN	Protein PRRC2C (BAT2 domain-containing protein 1) (HBV X-transactivated gene 2 protein) (HBV XAg-transactivated protein 2) (HLA-B-associated transcript 2-like 2) (Proline-rich and coiled-coil-containing protein 2C)	-0.6	34	8.5	400	52	29	0.552655	Ambiguous		302.79	38.696	316.911		D	9883
CL262Contig4	Q6GN19_XENLA	PARD3_HUMAN	Partitioning defective 3 homolog (PAR-3) (PARD-3) (Atypical PKC isotype-specific-interacting protein) (ASIP) (CTCL tumor antigen se2-5) (PAR3-alpha)	-3	1.5	0	270	51	19	0.375298	Ambiguous		129.84	117.402	151.423		D	3790
dsrrswapns_comp217680_c2_seq8	F7AAR0_XENTR	SIK3_HUMAN	Serine/threonine-protein kinase SIK3 (EC 2.7.11.1) (Salt-inducible kinase 3) (SIK-3) (Serine/threonine-protein kinase QSK)	-3	0.1	0	99	50	10	0.197574	Ambiguous		143.27	86.805	139.98		D	9855
CL407Contig8	Q7ZWZ2_XENLA	PAIRB_HUMAN	Plasminogen activator inhibitor 1 RNA-binding protein (PAI1 RNA-binding protein 1) (PAI-RBP1) (SERPINE1 mRNA-binding protein 1)	-2.15	99	0.7	220	47	16	0.336434	Ambiguous		42.631	43.131	44.965		D	5329
CL4412Contig1	Q6NRI3_XENLA	ANR52_HUMAN	Serine/threonine-protein phosphatase 6 regulatory ankyrin repeat subunit C (PP6-ARS-C) (Serine/threonine-protein phosphatase 6 regulatory subunit ARS-C) (Ankyrin repeat domain-containing protein 52)	-3	0	0	100	47	7.3	0.155827	Ambiguous		112.55	74.962	115.077		D	5621
CL18061Contig1		BCD1_HUMAN	Box C/D snoRNA protein 1 (Serologically defined breast cancer antigen NY-BR-75) (Zinc finger HIT domain-containing protein 6)	3	0	530	340	46	24	0.523513	Ambiguous		33.962		53.918		D	2298
zeinaSSns_comp389116_c0_seq23	SETB1_XENLA	SETB1_HUMAN	Histone-lysine N-methyltransferase SETDB1 (EC 2.1.1.43) (ERG-associated protein with SET domain) (ESET) (Histone H3-K9 methyltransferase 4) (H3-K9-HMTase 4) (Lysine N-methyltransferase 1E) (SET domain bifurcated 1)	0.45	2.9	8.4	400	45	29	0.640986	Ambiguous		139.59	141.777	143.157		D	11245
CL21628Contig1	F6WFG7_XENTR	LPIN1_HUMAN	Phosphatidate phosphatase LPIN1 (EC 3.1.3.4) (Lipin-1)	-3	1.5	0	92	45	6.6	0.145297	Ambiguous		96.453	99.572	98.664		D	3144
CL1624Contig1	Q2VPG5_XENLA	NAA25_HUMAN	N-alpha-acetyltransferase 25, NatB auxiliary subunit (Mitochondrial distribution and morphology protein 20) (N-terminal acetyltransferase B complex subunit MDM20) (NatB complex subunit MDM20) (N-terminal acetyltransferase B complex subunit NAA25) (p120)				290	41	21	0.518014	Ambiguous		111.2	100.448	112.292		D	1996
CL12788Contig1	GTPBA_XENLA	GTPBA_HUMAN	GTP-binding protein 10 (Protein obg homolog 2) (ObgH2)				260	41	19	0.455674	Ambiguous		42.066	42.067	42.933		D	1158
CL6875Contig1	Q6GPR0_XENLA	LRRK1_HUMAN	Leucine-rich repeat serine/threonine-protein kinase 1 (EC 2.7.11.1)	-3	2.7	0	140	41	9.8	0.239792	Ambiguous		223.98	36.245	225.393		D	7362
CL107Contig1	Q5XGY8_XENLA	SRSF9_HUMAN	Serine/arginine-rich splicing factor 9 (Pre-mRNA-splicing factor SRp30C) (Splicing factor, arginine/serine-rich 9)	2.95	0.6	540	490	40	35	0.878976	Ambiguous		28.839	186.245	25.542		D	479
CL9557Contig1	BORE2_XENLA			0.174607	18	27	350	40	25	0.619709	Ambiguous		34.199	32.372			D	8640
dsrrswapns_comp199238_c0_seq3	CB044_XENLA	CB044_HUMAN	WD repeat and coiled-coil-containing protein C2orf44 (WD repeat and coiled-coil-containing protein) (WDCP)	-3	5.6	0	100	40	7.4	0.184858	Ambiguous		79.708	79.727	79.136		D	7159
CL161Contig8	CQ085_XENLA	CQ085_HUMAN	Uncharacterized protein C17orf85 (Protein ELG)	2.79	0.1	66	71	40	5.1	0.127472	Ambiguous		69.74	69.741	70.593		D	1992
CL5736Contig2	BRX1_XENLA	BRX1_HUMAN	Ribosome biogenesis protein BRX1 homolog (Brix domain-containing protein 2)	2.43	1.1	290	130	38	9.5	0.248725	Ambiguous		39.382	39.383	41.401		D	6642
CL10674Contig2	F6VQ54_XENTR	ANR17_HUMAN	Ankyrin repeat domain-containing protein 17 (Gene trap ankyrin repeat protein) (Serologically defined breast cancer antigen NY-BR-16)	-0.7	13	2.5	400	37	29	0.781914	Ambiguous		45.093	203.699	274.258		D	433
CL749Contig6	Q3KQ61_XENLA	NDUF4_HUMAN	NADH dehydrogenase [ubiquinone] 1 alpha subcomplex assembly factor 4 (Hormone-regulated proliferation-associated protein of 20 kDa)	3	0	0.9	72	37	5.2	0.139282	Ambiguous		20.127	20.113	20.266		D	7683
CL6820Contig1	A9ULN3_XENTR	KNOP1_HUMAN	Lysine-rich nucleolar protein 1 (Protein FAM191A) (Testis-specific gene 118 protein)	3	0	290	98	36	7	0.194777	Ambiguous		64.777		51.589		D	7335
CL1150Contig1	A3KNB2_XENLA	XRN2_HUMAN	5'-3' exoribonuclease 2 (EC 3.1.13.-) (DHM1-like protein) (DHP protein)	2.54	0.3	100	310	35	22	0.635385	Ambiguous	BioGrid	83.433	142.663	108.582		D	743
CL6043Contig2	Q6INE0_XENLA	RAD17_HUMAN	Cell cycle checkpoint protein RAD17 (hRad17) (RF-C/activator 1 homolog)	2.79	0.3	210	150	34	11	0.315473	Ambiguous		75.502	75.503	77.055		D	6868
CL7606Contig1	MAT1_XENLA	MAT1_HUMAN	CDK-activating kinase assembly factor MAT1 (CDK7/cyclin-H assembly factor) (Cyclin-G1-interacting protein) (Menage a trois) (RING finger protein 66) (RING finger protein MAT1) (p35) (p36)	3	0	380	120	33	8.7	0.265704	Ambiguous		36.047	36.047	35.823		D	7743
CL478Contig4	F6ZM01_XENTR	UBR5_HUMAN	E3 ubiquitin-protein ligase UBR5 (EC 6.3.2.-) (E3 ubiquitin-protein ligase, HECT domain-containing 1) (Hyperplastic discs protein homolog) (hHYD) (Progestin-induced protein)	2.09	0.7	84	400	32	29	0.914496	Ambiguous		303.13	106.585	309.352		D	5933
dsrrswapns_comp214726_c1_seq5	Q6GNU0_XENLA	GIT2_HUMAN	ARF GTPase-activating protein GIT2 (ARF GAP GIT2) (Cool-interacting tyrosine-phosphorylated protein 2) (CAT-2) (CAT2) (G protein-coupled receptor kinase-interactor 2) (GRK-interacting protein 2)	-3	4.5	0	170	32	12	0.366564	Ambiguous		81.422	84.734	84.543		D	8833
CL174Contig1	Q2TAV4_XENLA	PRPF3_HUMAN	U4/U6 small nuclear ribonucleoprotein Prp3 (Pre-mRNA-splicing factor 3) (hPrp3) (U4/U6 snRNP 90 kDa protein)	2.46	1.2	340	300	30	22	0.731384	Ambiguous		77.062	76.862	77.529		D	2201
CL1Contig155	Q566H0_XENLA	CCNK_HUMAN	Cyclin-K	3	0	280	350	28	25	0.894346	Ambiguous		66.042	63.517	64.24		D	2734
dsrrswapns_comp209506_c0_seq3	CHD8_XENTR	CHD8_HUMAN	Chromodomain-helicase-DNA-binding protein 8 (CHD-8) (EC 3.6.4.12) (ATP-dependent helicase CHD8) (Helicase with SNF2 domain 1)	1.65	3.6	160	330	28	24	0.8306	Ambiguous		46.834		290.519		D	9223
CL587Contig1	F6SUB4_XENTR	P3C2A_HUMAN	Phosphatidylinositol 4-phosphate 3-kinase C2 domain-containing subunit alpha (PI3K-C2-alpha) (PtdIns-3-kinase C2 subunit alpha) (EC 2.7.1.154) (Phosphoinositide 3-kinase-C2-alpha)	-3	2.1	0	97	28	7	0.247698	Ambiguous		190.6	98.705	190.68		D	6744
dsrrswapns_comp209305_c0_seq3	F6SQC4_XENTR	JIP4_HUMAN	C-Jun-amino-terminal kinase-interacting protein 4 (JIP-4) (JNK-interacting protein 4) (Cancer/testis antigen 89) (CT89) (Human lung cancer oncogene 6 protein) (HLC-6) (JNK-associated leucine-zipper protein) (JLP) (Mitogen-activated protein kinase 8-interacting protein 4) (Proliferation-inducing protein 6) (Protein highly expressed in testis) (PHET) (Sperm surface protein) (Sperm-associated antige…	0.94	2.6	22	180	27	13	0.485275	Ambiguous		119.73		146.205		D	9218
CL1813Contig3	F6U1L8_XENTR	STK36_HUMAN	Serine/threonine-protein kinase 36 (EC 2.7.11.1) (Fused homolog)	-3	2	0	92	27	6.6	0.243811	Ambiguous		140.83	53.127	143.995		D	2307
zeinaSSns_comp389025_c0_seq7	Q7ZX14_XENLA	KPRA_HUMAN	Phosphoribosyl pyrophosphate synthase-associated protein 1 (PRPP synthase-associated protein 1) (39 kDa phosphoribosypyrophosphate synthase-associated protein) (PAP39)	-3	5.1	0	57	27	4.1	0.14864	Ambiguous		39.532	44.2	39.394		D	7561
CL186Contig13	PESC_XENLA	PESC_HUMAN	Pescadillo homolog	2.43	0.8	210	51	27	3.6	0.133986	Ambiguous		70.835	67.117	68.003		D	2409
zeinaSSns_comp388604_c0_seq1	Q7ZY65_XENLA	KC1A_HUMAN	Casein kinase I isoform alpha (CKI-alpha) (EC 2.7.11.1) (CK1)	0.56	4.2	15	390	26	28	1.05955	Ambiguous		38.869	38.87	38.915		D	11195
CL26588Contig1	F6XV57_XENTR	SKA1_HUMAN	Spindle and kinetochore-associated protein 1	-3	44	0	220	26	16	0.591924	Ambiguous		29.49		29.484		D	3817
CL5517Contig1	Q5XGW9_XENLA	SNX31_HUMAN	Sorting nexin-31	3	0	0.3	210	26	15	0.570903	Ambiguous		50.246	51.276	50.802		D	6492
CL11494Contig1	F6UA27_XENTR	SSH1_HUMAN	Protein phosphatase Slingshot homolog 1 (EC 3.1.3.16) (EC 3.1.3.48) (SSH-like protein 1) (SSH-1L) (hSSH-1L)	-0.48	1.8	0.6	100	26	7.3	0.281061	Ambiguous		113.84	71.359	115.511		D	727
CL7658Contig1	Q6GQ41_XENLA	MET17_HUMAN	Methyltransferase-like protein 17, mitochondrial (EC 2.1.1.-) (False p73 target gene protein) (Methyltransferase 11 domain-containing protein 1) (Protein RSM22 homolog, mitochondrial)				300	25	21	0.842737	Ambiguous		51.985	51.985	50.734	MT	D	7777
CL341Contig5	Q2TAG7_XENLA	TAXB1_HUMAN	Tax1-binding protein 1 (TRAF6-binding protein)	-3	4.9	0	150	24	11	0.436833	Ambiguous		96.593	88.881	90.877		D	4613
CL1304Contig1	D5JEJ8_XENLA	AFAD_HUMAN	Afadin (ALL1-fused gene from chromosome 6 protein) (Protein AF-6)	-1.28	5.8	0.3	53	24	3.8	0.160386	Ambiguous		214.46	203.105	206.804		D	1234
CL1703Contig5	F6XWB3_XENTR	ZN839_HUMAN	Zinc finger protein 839 (Renal carcinoma antigen NY-REN-50)	3	0	110	410	23	29	1.30307	Ambiguous		85.506		87.484		D	2121
CL5125Contig1	T2FA_XENLA	T2FA_HUMAN	General transcription factor IIF subunit 1 (General transcription factor IIF 74 kDa subunit) (Transcription initiation factor IIF subunit alpha) (TFIIF-alpha) (Transcription initiation factor RAP74)	2.64	1	420	120	23	8.5	0.370186	Ambiguous		58.698	58.699	58.24		D	6195
CL2220Contig4	F7D634_XENTR	ZFP91_HUMAN	E3 ubiquitin-protein ligase ZFP91 (EC 6.3.2.-) (Zinc finger protein 757) (Zinc finger protein 91 homolog) (Zfp-91)	3	0	74	420	22	30	1.32884	Ambiguous		57.984	63.646	63.445		D	3223
CL3244Contig2	Q498H4_XENLA	HTR5B_HUMAN	HEAT repeat-containing protein 5B	-3	7.5	0	230	22	16	0.763586	Ambiguous		222.74	112.33	224.302		D	4430
CL1584Contig2	ZFR_XENLA	ZFR_HUMAN	Zinc finger RNA-binding protein (hZFR) (M-phase phosphoprotein homolog)	2.23	1.4	240	210	22	15	0.686932	Ambiguous		115.22	115.218	117.012		D	1934
CL2088Contig4	Q7T0P8_XENLA	CND2_HUMAN	Condensin complex subunit 2 (Barren homolog protein 1) (Chromosome-associated protein H) (hCAP-H) (Non-SMC condensin I complex subunit H) (XCAP-H homolog)	-2.51	41	0.1	130	22	9.4	0.429467	Ambiguous		77.244	77.245	82.563		D	3018
CL6275Contig1	Q6PCJ2_XENLA	RPA2_HUMAN	DNA-directed RNA polymerase I subunit RPA2 (RNA polymerase I subunit 2) (EC 2.7.7.6) (DNA-directed RNA polymerase I 135 kDa polypeptide) (RPA135)	1.67	1.4	66	87	21	6.2	0.297512	Ambiguous		128.34	128.215	128.229		D	6993
CL758Contig3	B1WBA2_XENLA	ANKH1_HUMAN	Ankyrin repeat and KH domain-containing protein 1 (HIV-1 Vpr-binding ankyrin repeat protein) (Multiple ankyrin repeats single KH domain) (hMASK)	-3	23	0	340	20	25	1.2119	Ambiguous		245.62	150.712	269.458		D	7728
dsrrswapns_comp212626_c1_seq1	Q5FV80_XENLA	IFT74_HUMAN	Intraflagellar transport protein 74 homolog (Capillary morphogenesis gene 1 protein) (CMG-1) (Coiled-coil domain-containing protein 2)	-3	30	0	57	20	4.1	0.204205	Ambiguous		69.394	69.309	69.239		D	9400
CL1648Contig2	AGAP1_XENLA	AGAP3_HUMAN	Arf-GAP with GTPase, ANK repeat and PH domain-containing protein 3 (AGAP-3) (CRAM-associated GTPase) (CRAG) (Centaurin-gamma-3) (Cnt-g3) (MR1-interacting protein) (MRIP-1)	-1.31	18	0.9	410	19	29	1.49878	Ambiguous		94.154	95.107	95.044		D	2026
CL7160Contig2	SPT4H_XENLA	SPT4H_HUMAN	Transcription elongation factor SPT4 (hSPT4) (DRB sensitivity-inducing factor 14 kDa subunit) (DSIF p14) (DRB sensitivity-inducing factor small subunit) (DSIF small subunit)	1.53	10	340	190	19	13	0.714501	Ambiguous		13.221	13.221	13.193		D	7536
CL1575Contig5	SNF5_XENLA	SNF5_HUMAN	SWI/SNF-related matrix-associated actin-dependent regulator of chromatin subfamily B member 1 (BRG1-associated factor 47) (BAF47) (Integrase interactor 1 protein) (SNF5 homolog) (hSNF5)	3	0	260	150	18	11	0.579215	Ambiguous	BioGrid	44.128	43.298	44.141		D	1925
zeinaSSns_comp386613_c0_seq2	PHR4A_XENLA	PHAR4_HUMAN	Phosphatase and actin regulator 4	-3	39	0	71	18	5.1	0.283552	Ambiguous		78.185	76.367	78.211		D	11059
CL2129Contig2	KDM2A_XENTR	KDM2A_HUMAN	Lysine-specific demethylase 2A (EC 1.14.11.27) (CXXC-type zinc finger protein 8) (F-box and leucine-rich repeat protein 11) (F-box protein FBL7) (F-box protein Lilina) (F-box/LRR-repeat protein 11) (JmjC domain-containing histone demethylation protein 1A) ([Histone-H3]-lysine-36 demethylase 1A)	1.73	1.1	58	69	18	4.9	0.274578	Ambiguous		60.552	144.054	132.793		D	3096
CL199Contig1	Q66J82_XENLA	RU17_HUMAN	U1 small nuclear ribonucleoprotein 70 kDa (U1 snRNP 70 kDa) (U1-70K) (snRNP70)	0.75	24	140	290	17	20	1.18272	Ambiguous		28.203	31.956	51.557		D	2642
dsrrswapns_comp215673_c3_seq6	Q68F05_XENLA	CHERP_HUMAN	Calcium homeostasis endoplasmic reticulum protein (ERPROT 213-21) (SR-related CTD-associated factor 6)	2.12	1.2	160	430	16	31	1.98009	Ambiguous		105.26	106.144	103.702		D	9641
CL7352Contig1	Q08D52_XENTR	APC1_HUMAN	Anaphase-promoting complex subunit 1 (APC1) (Cyclosome subunit 1) (Mitotic checkpoint regulator) (Testis-specific gene 24 protein)	0.1	11	14	300	16	22	1.33925	Ambiguous	Thakar	216.51		216.5		D	7619
CL9678Contig2	A9UMT4_XENTR	RM47_HUMAN	39S ribosomal protein L47, mitochondrial (L47mt) (MRP-L47) (Nasopharyngeal carcinoma metastasis-related protein 1)				300	16	21	1.32671	Ambiguous		29.665		29.45	MT	D	8687
CL3158Contig2	Q5XHG4_XENLA	PLRG1_HUMAN	Pleiotropic regulator 1	2.63	1.5	620	260	16	19	1.14871	Ambiguous		62.708	57.531	57.194		D	4361
CL1954Contig2	F6S350_XENTR	ATAD2_HUMAN	ATPase family AAA domain-containing protein 2 (EC 3.6.1.3) (AAA nuclear coregulator cancer-associated protein) (ANCCA)	1.69	1.7	85	150	16	11	0.66561	Ambiguous		154.83	98.119	158.554		D	2572
zeinaSSns_comp386544_c0_seq5	Q8AVX7_XENLA	SMCE1_HUMAN	SWI/SNF-related matrix-associated actin-dependent regulator of chromatin subfamily E member 1 (BRG1-associated factor 57) (BAF57)	2.71	0.7	360	150	16	11	0.647277	Ambiguous		49.954	13.825	46.649		D	219
TC419409	Q6AZM7_XENLA	PPOX_HUMAN	Protoporphyrinogen oxidase (PPO) (EC 1.3.3.4)				75	16	5.4	0.328981	Ambiguous		53.316	51.757	50.765		D	10424
CL16Contig16	RBMX_XENLA	RBMX_HUMAN	RNA-binding motif protein, X chromosome (Glycoprotein p43) (Heterogeneous nuclear ribonucleoprotein G) (hnRNP G) [Cleaved into: RNA-binding motif protein, X chromosome, N-terminally processed]	1.89	4.2	330	340	15	24	1.56992	Ambiguous		40.298	40.299	42.332		D	2107
CL6898Contig1	Q7ZTM1_XENLA	PPIL2_HUMAN	Peptidyl-prolyl cis-trans isomerase-like 2 (PPIase) (EC 5.2.1.8) (EC 6.3.2.-) (CYC4) (Cyclophilin-60) (Cyclophilin-like protein Cyp-60) (Cyp60) (hCyP-60) (Rotamase PPIL2)	3	0.4	560	280	15	20	1.3634	Ambiguous		59.228	59.229	58.823		D	7374
TC418232	TRF6B_XENLA	TRAF6_HUMAN	TNF receptor-associated factor 6 (EC 6.3.2.-) (E3 ubiquitin-protein ligase TRAF6) (Interleukin-1 signal transducer) (RING finger protein 85)	-3	7.6	0	270	15	19	1.29867	Ambiguous		63.209	63.209	59.573		D	10416
CL2826Contig3	Q6NTK0_XENLA	ICA69_HUMAN	Islet cell autoantigen 1 (69 kDa islet cell autoantigen) (ICA69) (Islet cell autoantigen p69) (ICAp69) (p69)	-3	26	0	160	15	12	0.765731	Ambiguous		58.217	58.218	54.645		D	4016
CL374Contig6	Q7T0S1_XENLA	FNBP4_HUMAN	Formin-binding protein 4 (Formin-binding protein 30)	0.85	28	200	120	15	8.3	0.556179	Ambiguous		99.425	60.569	110.266		D	4973
CL13856Contig1	Q66KU9_XENLA	LSM6_HUMAN	U6 snRNA-associated Sm-like protein LSm6	0.51	510	1700	310	14	22	1.54855	Ambiguous		9.1275	9.128	9.128		D	1465
CL3074Contig3	Q6AXA7_XENLA	PRP6_HUMAN	Pre-mRNA-processing factor 6 (Androgen receptor N-terminal domain-transactivating protein 1) (ANT-1) (PRP6 homolog) (U5 snRNP-associated 102 kDa protein) (U5-102 kDa protein)	3	0.1	380	120	14	8.4	0.589956	Ambiguous		109.2	107.333	106.925		D	4286
CL3275Contig2	A9UMP9_XENLA	SMG5_HUMAN	Protein SMG5 (EST1-like protein B) (LPTS-RP1) (LPTS-interacting protein) (SMG-5 homolog) (hSMG-5)	-3	0.5	0	76	14	5.4	0.374573	Ambiguous		121.33	101.31	113.928		D	4464
CL151Contig1	Q6DDZ8_XENLA	MINK1_HUMAN	Misshapen-like kinase 1 (EC 2.7.11.1) (GCK family kinase MiNK) (MAPK/ERK kinase kinase kinase 6) (MEK kinase kinase 6) (MEKKK 6) (Misshapen/NIK-related kinase) (Mitogen-activated protein kinase kinase kinase kinase 6)	-1.6	5.7	0.1	360	13	26	1.90972	Ambiguous		144.2	144.206	149.822		D	1786
CL3337Contig2	V5QPX9_XENLA	GIT1_HUMAN	ARF GTPase-activating protein GIT1 (ARF GAP GIT1) (Cool-associated and tyrosine-phosphorylated protein 1) (CAT-1) (CAT1) (G protein-coupled receptor kinase-interactor 1) (GRK-interacting protein 1)	-3	6	0	200	13	15	1.13213	Ambiguous		82.357	83.378	84.341		D	4523
CL2921Contig2	Q7ZWQ2_XENLA	RHG12_HUMAN	Rho GTPase-activating protein 12 (Rho-type GTPase-activating protein 12)	-3	6.1	0	180	13	13	1.02978	Ambiguous		92.343	87.651	96.254		D	4112
CL569Contig8	Q4QR32_XENLA	RS29_HUMAN	40S ribosomal protein S29	-2	1200	12	130	13	9.6	0.711779	Ambiguous		6.6647	6.663	6.677		D	6614
CL6460Contig2	F6ZE35_XENTR	DEN5B_HUMAN	DENN domain-containing protein 5B (Rab6IP1-like protein)				76	13	5.5	0.422978	Ambiguous		152.73	210.866	145.02	TM	D	7121
CL9877Contig1	MRE11_XENLA	MRE11_HUMAN	Double-strand break repair protein MRE11A (Meiotic recombination 11 homolog 1) (MRE11 homolog 1) (Meiotic recombination 11 homolog A) (MRE11 homolog A)	3	0.1	620	420	12	30	2.51903	Ambiguous		81.13	81.131	80.593		D	8776
CL5673Contig2	Q640Z2_XENLA	SRGP2_HUMAN	SLIT-ROBO Rho GTPase-activating protein 2 (srGAP2) (Formin-binding protein 2) (Rho GTPase-activating protein 34)	-3	2.9	0	51	12	3.7	0.312235	Ambiguous		115.75	115.917	120.881		D	6594
CL7657Contig1	VAC14_XENLA	VAC14_HUMAN	Protein VAC14 homolog (Tax1-binding protein 2)	-2.49	170	0.5	77	11	33	3.06303	Ambiguous		88.87	88.917	87.973		D	7776
zeinaSSns_comp385295_c0_seq1	LSM12_XENLA	LSM12_HUMAN	Protein LSM12 homolog	-0.84	35	4.9	410	11	30	2.66101	Ambiguous		21.498	21.499	21.701		D	5120
CL3116Contig2	F6X467_XENTR	DDX23_HUMAN	Probable ATP-dependent RNA helicase DDX23 (EC 3.6.4.13) (100 kDa U5 snRNP-specific protein) (DEAD box protein 23) (PRP28 homolog) (U5-100kD)	2.42	2	520	330	11	24	2.11859	Ambiguous		93.52	68.236	95.583		D	4325
CL3254Contig2	F6VRS4_XENTR	ANLN_HUMAN	Actin-binding protein anillin	2.31	2.1	430	140	11	9.8	0.864834	Ambiguous		96.699	122.831	124.199		D	4443
dsrrswapns_comp211593_c0_seq6	F7DC37_XENTR	GUF1_HUMAN	Translation factor GUF1, mitochondrial (EC 3.6.5.-) (Elongation factor 4 homolog) (EF-4) (GTPase GUF1) (Ribosomal back-translocase)				70	11	5	0.472965	Ambiguous		70.385	34.378	74.328	MT	D	3158
CL5675Contig1	Q6GPQ7_XENLA	WDR7_HUMAN	WD repeat-containing protein 7 (Rabconnectin-3 beta) (TGF-beta resistance-associated protein TRAG)	3	0	15	81	10	5.8	0.560029	Ambiguous		108.69	105.602	163.81		D	6595
CL8528Contig2	B1H3I9_XENTR	CLPB_HUMAN	Caseinolytic peptidase B protein homolog (Suppressor of potassium transport defect 3)	-3	0.3	0	130	9.9	9	0.902731	Ambiguous		74.457		78.729		D	8182
dsrrswapns_comp205241_c0_seq1	CD123_XENLA	CD123_HUMAN	Cell division cycle protein 123 homolog (Protein D123) (HT-1080) (PZ32)	-1.37	6.4	0.3	79	9.9	5.7	0.576352	Ambiguous		39.713	39.595	39.135		D	7539
CL5691Contig1	B7ZPW2_XENLA	SSBP_HUMAN	Single-stranded DNA-binding protein, mitochondrial (Mt-SSB) (MtSSB) (PWP1-interacting protein 17)				330	9.8	24	2.44522	Ambiguous		16.743	16.743	17.26	MT	D	6611
CL7208Contig1	BRE_XENLA	BRE_HUMAN	BRCA1-A complex subunit BRE (BRCA1/BRCA2-containing complex subunit 45) (Brain and reproductive organ-expressed protein)	0.52	8.9	29	180	9.7	13	1.30598	Ambiguous		43.504	43.592	43.552		D	7555
CL7783Contig1	F6T8M4_XENTR	CTRO_HUMAN	Citron Rho-interacting kinase (CRIK) (EC 2.7.11.1) (Serine/threonine-protein kinase 21)	1.5	1.4	44	57	9.7	4.1	0.419921	Ambiguous		237.09	83.372	231.431		D	7833
CL95Contig5	CLP1_XENLA	CLP1_HUMAN	Polyribonucleotide 5'-hydroxyl-kinase Clp1 (EC 2.7.1.78) (Polyadenylation factor Clp1) (Polynucleotide kinase Clp1) (Pre-mRNA cleavage complex II protein Clp1)	3	0	210	190	9.6	13	1.37813	Ambiguous		48.336	48.336	47.646		D	8653
CL1932Contig2	Q6NU33_XENLA	EPS8_HUMAN	Epidermal growth factor receptor kinase substrate 8	-3	7.8	0	53	9.6	3.8	0.397144	Ambiguous		87.503	87.504	91.882		D	2542
CL3075Contig2	Q60FK1_XENLA	TDRD6_HUMAN	Tudor domain-containing protein 6 (Antigen NY-CO-45) (Cancer/testis antigen 41.2) (CT41.2)	-3	40	0	210	9.4	42	4.4644	Ambiguous		276.33	216.262	236.517		D	4287
CL2489Contig4	OXR1_XENLA	OXR1_HUMAN	Oxidation resistance protein 1	-1.3	29	1.5	430	9.3	31	3.31042	Ambiguous		96.65	96.625	97.97		D	3561
CL20869Contig1	F7DRR0_XENTR	PCGF6_HUMAN	Polycomb group RING finger protein 6 (Mel18 and Bmi1-like RING finger) (RING finger protein 134)	2.16	0.2	30	100	8.6	7.4	0.858632	Ambiguous		32.459	30.128	39.047		D	3015
CL7009Contig1	F6WMD5_XENTR	WASH7_HUMAN	WASH complex subunit 7 (Strumpellin and WASH-interacting protein) (SWIP)	-0.69	2.3	0.5	120	8.5	8.2	0.972156	Ambiguous		134.08		136.403		D	7448
CL1Contig757	F6RK53_XENTR	XRN1_HUMAN	5'-3' exoribonuclease 1 (EC 3.1.13.-) (Strand-exchange protein 1 homolog)	-0.34	1.8	0.8	58	8.4	4.2	0.495415	Ambiguous		193.67	53.244	194.107		D	2861
CL583Contig2	Q6DJJ2_XENLA	KAP0_HUMAN	cAMP-dependent protein kinase type I-alpha regulatory subunit (Tissue-specific extinguisher 1) (TSE1) [Cleaved into: cAMP-dependent protein kinase type I-alpha regulatory subunit, N-terminally processed]	-2.54	44	0.1	420	8.3	30	3.58522	Ambiguous		43.218	43.219	42.982		D	6723
CL4908Contig2	Q6INB6_XENLA	ATPG_HUMAN	ATP synthase subunit gamma, mitochondrial (F-ATPase gamma subunit)				120	8.2	23	2.84056	Ambiguous		32.423	32.423	32.996	MT	D	6018
CL5957Contig1	A0MP09_XENLA	MYO3B_HUMAN	Myosin-IIIb (EC 2.7.11.1)	-3	7	0	91	8.2	6.5	0.789423	Ambiguous		119.02	31.56	151.829		D	6808
CL1Contig408	Q7SYA4_XENLA	CETN2_HUMAN	Centrin-2 (Caltractin isoform 1)	0.12	45	60	59	7.8	4.2	0.541819	Ambiguous		19.675	19.675	19.738		D	2822
CL8620Contig1	A9JS31_XENLA	RM04_HUMAN	39S ribosomal protein L4, mitochondrial (L4mt) (MRP-L4)				110	7.7	8.1	1.05954	Ambiguous		33.492	33.508	34.919		D	8226
CL7534Contig1	Q6NRJ3_XENLA	EXOSX_HUMAN	Exosome component 10 (EC 3.1.13.-) (Autoantigen PM/Scl 2) (P100 polymyositis-scleroderma overlap syndrome-associated autoantigen) (Polymyositis/scleroderma autoantigen 100 kDa) (PM/Scl-100) (Polymyositis/scleroderma autoantigen 2)	2.7	0.3	130	63	7.7	4.5	0.578808	Ambiguous		102.81	101.897	100.831		D	7703
CL14600Contig1	F6VY98_XENTR	DDX41_HUMAN	Probable ATP-dependent RNA helicase DDX41 (EC 3.6.4.13) (DEAD box protein 41) (DEAD box protein abstrakt homolog)	2.53	0.7	230	62	7.6	4.4	0.578654	Ambiguous		69.584	77.303	69.838		D	1638
CL1860Contig1	Q5XGV4_XENLA	ECT2_HUMAN	Protein ECT2 (Epithelial cell-transforming sequence 2 oncogene)	1.58	2.6	96	97	7.5	7	0.927079	Ambiguous		110.53	110.401	103.505		D	2393
CL4659Contig1	B1WBD5_XENLA	CAPR2_HUMAN	Caprin-2 (C1q domain-containing protein 1) (Cytoplasmic activation/proliferation-associated protein 2) (Gastric cancer multidrug resistance-associated protein) (Protein EEG-1) (RNA granule protein 140)	-3	360	0.1	430	7.4	31	4.11633	Ambiguous		114.54	105.494	125.925		D	5834
CL24741Contig1	Q66KZ5_XENLA	MIME_HUMAN	Mimecan (Osteoglycin) (Osteoinductive factor) (OIF)				60	7.4	4.3	0.582216	Ambiguous		34.589	32.9	33.922	ER	D	3534
CL6354Contig1	F7BWM4_XENTR	STRUM_HUMAN	WASH complex subunit strumpellin (Strumpellin)	-3	3.7	0	150	7.3	10	1.42668	Ambiguous		134.06		134.286		D	7052
dsrrswapns_comp211975_c9_seq1	Q640Z3_XENLA	AKA7G_HUMAN	A-kinase anchor protein 7 isoform gamma (AKAP-7 isoform gamma) (A-kinase anchor protein 18 kDa) (AKAP 18) (Protein kinase A-anchoring protein 7 isoform gamma) (PRKA7 isoform gamma)	-3	0.1	0	83	7.1	5.9	0.834757	Ambiguous		37.655	49.226	39.518		D	9358
CL836Contig5	Q52KD5_XENLA	ATRX_HUMAN	Transcriptional regulator ATRX (EC 3.6.4.12) (ATP-dependent helicase ATRX) (X-linked helicase II) (X-linked nuclear protein) (XNP) (Znf-HX)	3	0	82	71	7.1	5.1	0.711592	Ambiguous		256.2	33.163	282.586		D	8110
dsrrswapns_comp215455_c0_seq7	TRCB_XENLA	FBW1A_HUMAN	F-box/WD repeat-containing protein 1A (E3RSIkappaB) (Epididymis tissue protein Li 2a) (F-box and WD repeats protein beta-TrCP) (pIkappaBalpha-E3 receptor subunit)	-1.98	34	0.4	370	6.9	26	3.80842	Ambiguous		61.013	59.507	68.867		D	5243
CL9720Contig1	Q6IP64_XENLA	RPC5_HUMAN	DNA-directed RNA polymerase III subunit RPC5 (RNA polymerase III subunit C5) (DNA-directed RNA polymerase III 80 kDa polypeptide)	0.82	54	350	330	6.3	23	3.71777	Ambiguous		79.469	79.47	79.898		D	8706
CL335Contig4	RANB9_XENLA	RANB9_HUMAN	Ran-binding protein 9 (RanBP9) (BPM-L) (BPM90) (Ran-binding protein M) (RanBPM) (RanBP7)	0.96	6.2	56	53	6.3	3.8	0.596026	Ambiguous		60.481	60.482	77.847		D	4539
CL710Contig1	A2RV71_XENLA	LMO7_HUMAN	LIM domain only protein 7 (LMO-7) (F-box only protein 20) (LOMP)	-0.96	27	2.9	370	6.2	27	4.3275	Ambiguous		152.49	150.804	192.696		D	7516
CL4385Contig1	Q32NM0_XENLA	TSSC1_HUMAN	Protein TSSC1 (Tumor-suppressing STF cDNA 1 protein) (Tumor-suppressing subchromosomal transferable fragment candidate gene 1 protein)	-3	31	0	94	6.2	6.7	1.08283	Ambiguous		40	40	43.603		D	5601
CL10700Contig1	HDAC3_XENLA	HDAC3_HUMAN	Histone deacetylase 3 (HD3) (EC 3.5.1.98) (RPD3-2) (SMAP45)	3	0	55	67	6.2	4.8	0.770239	Ambiguous	BioGrid	50.038	66.021	48.848		D	446
TC424362	Q801P6_XENLA	ILF3_HUMAN	Interleukin enhancer-binding factor 3 (Double-stranded RNA-binding protein 76) (DRBP76) (M-phase phosphoprotein 4) (MPP4) (Nuclear factor associated with dsRNA) (NFAR) (Nuclear factor of activated T-cells 90 kDa) (NF-AT-90) (Translational control protein 80) (TCP80)	2.46	2.6	760	460	6	33	5.55143	Ambiguous		94.332	93.413	95.338		D	10449
TC419279	Q5MMR9_XENLA	SMCA4_HUMAN	Transcription activator BRG1 (EC 3.6.4.-) (ATP-dependent helicase SMARCA4) (BRG1-associated factor 190A) (BAF190A) (Mitotic growth and transcription activator) (Protein BRG-1) (Protein brahma homolog 1) (SNF2-beta) (SWI/SNF-related matrix-associated actin-dependent regulator of chromatin subfamily A member 4)	2.38	1.1	270	110	5.8	8.2	1.40262	Ambiguous		181.13	181.128	184.646		D	2565
CL6364Contig1	LYRM4_XENLA	LYRM4_HUMAN	LYR motif-containing protein 4				250	5.6	18	3.18655	Ambiguous		10.65	10.65	10.758		D	7058
dsrrswapns_comp214519_c1_seq1	STRBP_XENLA	STRBP_HUMAN	Spermatid perinuclear RNA-binding protein	2.05	1.5	170	97	5.3	7	1.32584	Ambiguous		73.707	75.304	73.653		D	2322
CL7940Contig1	ORC4_XENLA	ORC4_HUMAN	Origin recognition complex subunit 4	0.19	26	40	210	5	15	2.99388	Ambiguous		49.41	49.411	50.377		D	7910
CL13265Contig1	WIPI4_XENLA	WIPI4_HUMAN	WD repeat domain phosphoinositide-interacting protein 4 (WIPI-4) (WD repeat-containing protein 45)	-3	8.1	0	98	5	7	1.39628	Ambiguous		39.365	39.234	39.868		D	1300
CL975Contig5	Q5XH65_XENLA	LIMA1_HUMAN	LIM domain and actin-binding protein 1 (Epithelial protein lost in neoplasm)	-3	11	0	82	5	5.9	1.18782	Ambiguous		79.827	79.828	85.226		D	8728
CL12909Contig1	RM28_XENLA	RM28_HUMAN	39S ribosomal protein L28, mitochondrial (L28mt) (MRP-L28) (Melanoma antigen p15) (Melanoma-associated antigen recognized by T-lymphocytes)				82	5	5.8	1.16066	Ambiguous		29.717	29.718	30.157	MT	D	1189
dsrrswapns_comp217358_c0_seq3	PAIP1_XENLA	ARID2_HUMAN	AT-rich interactive domain-containing protein 2 (ARID domain-containing protein 2) (BRG1-associated factor 200) (BAF200) (Zinc finger protein with activation potential) (Zipzap/p200)	3	0	68	62	5	4.4	0.893291	Ambiguous		145.98	51.223	197.391		D	9810
CL11189Contig1	Q68EX3_XENLA	RP25L_HUMAN	Ribonuclease P protein subunit p25-like protein (RNase P protein subunit-like p25) (Rpp25-like protein)	1.33	3.7	80	53	5	3.8	0.766264	Ambiguous		20.94	22.72	17.631		D	618
TC437488	Q7ZX57_XENLA	SRSF2_HUMAN	Serine/arginine-rich splicing factor 2 (Protein PR264) (Splicing component, 35 kDa) (Splicing factor SC35) (SC-35) (Splicing factor, arginine/serine-rich 2)	2.81	1.4	910	410	4.9	29	6.00998	Ambiguous	BioGrid	24.599	24.902	25.476		D	2875
CL9494Contig1	PNO1_XENLA	PNO1_HUMAN	RNA-binding protein PNO1	1.28	9.1	170	350	4.8	25	5.18001	Ambiguous	Thakar	26.365	26.366	27.924		D	8615
dsrrswapns_comp212798_c0_seq2	Q68EU5_XENLA	TIA1_HUMAN	Nucleolysin TIA-1 isoform p40 (RNA-binding protein TIA-1) (T-cell-restricted intracellular antigen-1) (TIA-1) (p40-TIA-1)	0.12	100	130	51	4.8	3.7	0.759358	Ambiguous		49.074	42.978	42.963		D	2254
CL8856Contig2	R4JU55_XENLA	KIF14_HUMAN	Kinesin-like protein KIF14	2.34	1.4	300	340	4.6	24	5.30461	Ambiguous		172.82	172.884	186.492		D	8322
CL6985Contig1	B7ZRM4_XENLA	ADAD1_HUMAN	Adenosine deaminase domain-containing protein 1 (Testis nuclear RNA-binding protein)	-1.42	5.1	0.2	270	4.6	19	4.18929	Ambiguous		51.47	51.471	64.411		D	7420
CL14980Contig1	IFT56_XENTR	TTC26_HUMAN	Intraflagellar transport protein 56 (Tetratricopeptide repeat protein 26) (TPR repeat protein 26)	-3	10	0	69	4.5	4.9	1.1061	Ambiguous		63.867		64.178		D	1720
CL8549Contig1				1.15546	21	300	250	4.4	18	4.0926	Ambiguous		45.134				D	8191
CL4116Contig2	SHOC2_XENLA	SHOC2_HUMAN	Leucine-rich repeat protein SHOC-2 (Protein soc-2 homolog) (Protein sur-8 homolog)	-0.33	31	14	68	4.4	4.9	1.09312	Ambiguous		64.079	64.1	64.888		D	5376
TC434035	A8E5R4_XENTR	TSR3_HUMAN	Ribosome biogenesis protein TSR3 homolog	-0.28	26	14	380	4.2	27	6.4541	Ambiguous		33.678		33.596		D	10536
CL14999Contig1	B2GUR3_XENTR	RPC2_HUMAN	DNA-directed RNA polymerase III subunit RPC2 (RNA polymerase III subunit C2) (EC 2.7.7.6) (C128) (DNA-directed RNA polymerase III 127.6 kDa polypeptide) (DNA-directed RNA polymerase III subunit B)	2.6	0.9	350	300	4.1	22	5.3263	Ambiguous		128.07	108.541	127.785		D	1725
CL9863Contig1	Q0V9F2_XENTR	RPC8_HUMAN	DNA-directed RNA polymerase III subunit RPC8 (RNA polymerase III subunit C8) (DNA-directed RNA polymerase III subunit H) (RNA polymerase III subunit 22.9 kDa subunit) (RPC22.9)	3	0	430	200	4.1	14	3.46542	Ambiguous		23.215		22.918		D	8768
CL2600Contig1	PRP31_XENLA	PRP31_HUMAN	U4/U6 small nuclear ribonucleoprotein Prp31 (Pre-mRNA-processing factor 31) (Serologically defined breast cancer antigen NY-BR-99) (U4/U6 snRNP 61 kDa protein) (Protein 61K) (hPrp31)	2.55	0.6	200	130	4.1	9.3	2.27492	Ambiguous		55.562	55.563	55.456		D	3747
CL5895Contig2	Q6DJJ8_XENLA	RPC3_HUMAN	DNA-directed RNA polymerase III subunit RPC3 (RNA polymerase III subunit C3) (DNA-directed RNA polymerase III subunit C) (RNA polymerase III 62 kDa subunit) (RPC62)	3	0.5	500	460	4	33	8.13113	Ambiguous		60.271	60.272	60.612		D	6760
CL2386Contig1	F6Q985_XENTR	LRMP_HUMAN	Lymphoid-restricted membrane protein (Protein Jaw1) [Cleaved into: Processed lymphoid-restricted membrane protein]				66	4	4.7	1.18813	Ambiguous		161.03		62.122	TM	D	3430
CL5Contig10	Q7SZU0_XENLA	MRT4_HUMAN	mRNA turnover protein 4 homolog (Ribosome assembly factor MRTO4)	1.22	23	390	290	3.9	21	5.40769	Ambiguous	BioGrid	28.774	27.479	27.56		D	6830
CL7022Contig2	F7DJ85_XENTR	ARHGA_HUMAN	Rho guanine nucleotide exchange factor 10	-1.34	5.6	0.3	100	3.9	7.4	1.90481	Ambiguous		150.15	110.401	151.612		D	7456
CL1052Contig6	A1DPK8_XENLA	TMOD3_HUMAN	Tropomodulin-3 (Ubiquitous tropomodulin) (U-Tmod)	-1.35	81	3.6	490	3.8	35	9.14162	Ambiguous		38.804	43.309	39.595		D	388
CL5883Contig1	PELO_XENLA	PELO_HUMAN	Protein pelota homolog (EC 3.1.-.-)	-1.01	57	5.6	390	3.8	28	7.37268	Ambiguous		43.128	43.147	43.359		D	6747
dsrrswapns_comp217399_c2_seq35	Q0IHS1_XENTR	AP2A1_HUMAN	AP-2 complex subunit alpha-1 (100 kDa coated vesicle protein A) (Adaptor protein complex AP-2 subunit alpha-1) (Adaptor-related protein complex 2 subunit alpha-1) (Alpha-adaptin A) (Alpha1-adaptin) (Clathrin assembly protein complex 2 alpha-A large chain) (Plasma membrane adaptor HA2/AP2 adaptin alpha A subunit)	-2.04	180	1.7	130	3.8	9.5	2.52076	Ambiguous		106.02	104.41	107.546		D	9817
CL4243Contig2	Q6GPN5_XENLA	OGFR_HUMAN	Opioid growth factor receptor (OGFr) (Protein 7-60) (Zeta-type opioid receptor)	-3	91	0	440	3.7	31	8.4092	Ambiguous		70.251	75.078	73.325		D	5484
dsrrswapns_comp212617_c2_seq3	A5PKP0_XENLA	PDLI5_HUMAN	PDZ and LIM domain protein 5 (Enigma homolog) (Enigma-like PDZ and LIM domains protein)	-0.37	18	7.8	110	3.7	7.5	2.04656	Ambiguous		62.85	62.955	63.945		D	9399
gi|623599|gb|J03831.1|XELCPROTEN	HNRPC_XENLA	HNRCL_HUMAN	Heterogeneous nuclear ribonucleoprotein C-like 1 (hnRNP C-like-1) (hnRNP core protein C-like 1)	3	0	670	310	3.6	89	24.5373	Ambiguous		30.95	30.95	32.142		D	9968
CL15754Contig1	A4QNG4_XENTR	TR112_HUMAN	Multifunctional methyltransferase subunit TRM112-like protein (tRNA methyltransferase 112 homolog)	0.06	270	310	320	3.6	23	6.27965	Ambiguous	Thakar	13.926		14.199		D	1923
CL65Contig2	Q6DD16_XENLA	RBM39_HUMAN	RNA-binding protein 39 (CAPER alpha) (Hepatocellular carcinoma protein 1) (RNA-binding motif protein 39) (RNA-binding region-containing protein 2) (Splicing factor HCC1)	3	0.2	590	74	3.6	5.3	1.46312	Ambiguous		59.809	59.81	59.38		D	7212
CL1Contig1355	NAA20_XENLA	NAA20_HUMAN	N-alpha-acetyltransferase 20 (EC 2.3.1.88) (Methionine N-acetyltransferase) (N-acetyltransferase 5) (N-terminal acetyltransferase B complex catalytic subunit NAA20) (N-terminal acetyltransferase B complex catalytic subunit NAT5) (NatB complex subunit NAT5) (NatB catalytic subunit)	-3	21	0	52	3.6	3.7	1.03817	Ambiguous		22.349	20.354	20.368		D	2708
CL14425Contig1	Q6GLZ2_XENLA	GLU2B_HUMAN	Glucosidase 2 subunit beta (80K-H protein) (Glucosidase II subunit beta) (Protein kinase C substrate 60.1 kDa protein heavy chain) (PKCSH)				450	3.5	32	9.23544	Ambiguous		57.372	57.373	59.425	ER	D	1603
TC413573	Q6GN12_XENLA	TBCD1_HUMAN	TBC1 domain family member 1	-3	20	0	120	3.5	8.3	2.39411	Ambiguous		139.7	139.7	133.084		D	10398
zeinaSSns_comp383753_c4_seq1	Q3KQC4_XENLA	ANR49_HUMAN	Ankyrin repeat domain-containing protein 49 (Fetal globin-inducing factor)	-3	9.5	0	190	3.4	14	4.09557	Ambiguous		29.362	29.363	27.29		D	10959
CL6844Contig2	B9UR70_XENLA	KI13B_HUMAN	Kinesin-like protein KIF13B (Kinesin-like protein GAKIN)	-3	20	0	140	3.4	10	3.02458	Ambiguous		215.93	215.936	202.789		D	7347
CL25Contig19	Q6DKD8_XENLA	NMT2_HUMAN	Glycylpeptide N-tetradecanoyltransferase 2 (EC 2.3.1.97) (Myristoyl-CoA:protein N-myristoyltransferase 2) (NMT 2) (Peptide N-myristoyltransferase 2) (Type II N-myristoyltransferase)	-3	29	0	93	3.4	6.7	1.98835	Ambiguous		57.162	57.162	56.98		D	3740
CL4636Contig1	A5PKS0_XENLA	GLCI1_HUMAN	Glucocorticoid-induced transcript 1 protein	-2.47	20	0.1	98	3.3	7	2.11564	Ambiguous		54.905	54.455	58.024		D	5808
CL657Contig4	B5DEA0_XENTR	ACACB_HUMAN	Acetyl-CoA carboxylase 2 (EC 6.4.1.2) (ACC-beta) [Includes: Biotin carboxylase (EC 6.3.4.14)]				81	3.3	5.8	1.77378	Ambiguous		274.45	79.499	276.541	MT	D	7202
CL10988Contig1	TT30A_XENLA	TT30B_HUMAN	Tetratricopeptide repeat protein 30B (TPR repeat protein 30B)	-3	12	0	54	3.3	3.9	1.16497	Ambiguous		75.558	155.084	76.099		D	544
CL6924Contig1	Q3KQ83_XENLA	CCNH_HUMAN	Cyclin-H (MO15-associated protein) (p34) (p37)	3	0	330	90	3.2	6.4	1.98314	Ambiguous		37.634	37.634	37.643		D	7399
CL9252Contig1	Q6DE35_XENLA	AAR2_HUMAN	Protein AAR2 homolog (AAR2 splicing factor homolog)	-0.97	88	9.5	360	3.1	26	8.34457	Ambiguous		45.295	44.606	43.472		D	8507
CL9141Contig1	A9UMI4_XENTR	SWP70_HUMAN	Switch-associated protein 70 (SWAP-70)	-3	12	0	110	3.1	7.6	2.45472	Ambiguous		68.524	70.172	68.998		D	8458
CL3070Contig4	DHX9_XENLA	DHX9_HUMAN	ATP-dependent RNA helicase A (RHA) (EC 3.6.4.13) (DEAH box protein 9) (Leukophysin) (LKP) (Nuclear DNA helicase II) (NDH II)	1.62	11	440	440	3	32	10.6378	Ambiguous		141.02	140.529	140.958		D	4283
CL2167Contig1	Q7ZX30_XENLA	SF3B4_HUMAN	Splicing factor 3B subunit 4 (Pre-mRNA-splicing factor SF3b 49 kDa subunit) (SF3b50) (Spliceosome-associated protein 49) (SAP 49)	2.1	2.1	260	330	3	24	7.84962	Ambiguous		40.209	40.209	44.386		D	3149
CL5384Contig1	TPPC9_XENLA	TPPC9_HUMAN	Trafficking protein particle complex subunit 9 (NIK- and IKBKB-binding protein) (Tularik gene 1 protein)	-3	11	0	72	3	5.2	1.73422	Ambiguous		129	129.006	128.53		D	6399
CL40213Contig1	DCC1_XENLA	DCC1_HUMAN	Sister chromatid cohesion protein DCC1 (Defective in sister chromatid cohesion protein 1 homolog)	2.06	3.2	370	60	3	4.3	1.44281	Ambiguous		45.15	44.555	44.825		D	5278
dsrrswapns_comp214190_c4_seq8	Q6IP83_XENLA	RANB3_HUMAN	Ran-binding protein 3 (RanBP3)	1.83	5.3	360	2	76	1400	19.0412	CRM1 cofactor	BioGrid	56.557	56.426	60.21		D.B NTR_CRM1 cofactor	9516
CL3160Contig1	SMO1B_XENLA	SUMO1_HUMAN	Small ubiquitin-related modifier 1 (SUMO-1) (GAP-modifying protein 1) (GMP1) (SMT3 homolog 3) (Sentrin) (Ubiquitin-homology domain protein PIC1) (Ubiquitin-like protein SMT3C) (Smt3C) (Ubiquitin-like protein UBL1)	0.75	4.7	27	0.52	740	46	0.0250879	NPC		11.63	11.63	11.557		D.B. NPC	4368
CL105Contig8	Q7ZZY7_XENLA	RAE1L_HUMAN	mRNA export factor (Rae1 protein homolog) (mRNA-associated protein mrnp 41)	0.46	63	180	73	740	21	0.0250879	NPC		40.99	167.863	40.968		D.B. NPC	409
CL1Contig277	O42193_XENLA	RANG_HUMAN	Ran-binding protein 1 (RanBP1)	-1.62	4100	97	210000	7	15000	2119.06	CRM1 cofactor	NESdbO, BioGrid, Thakar	24.271	24.271	23.31		D.B. NPC	2794
CL192Contig1	Q7ZYI0_XENLA	IMA1_HUMAN	Importin subunit alpha-1 (Karyopherin subunit alpha-2) (RAG cohort protein 1) (SRP1-alpha)	-0.59	390	99	9	1.7	0.64	0.373881	NTR	Thakar	57.629	57.629	57.862		D.B. NTR	2532
CL3813Contig4	XPO2_XENLA	XPO2_HUMAN	Exportin-2 (Exp2) (Cellular apoptosis susceptibility protein) (Chromosome segregation 1-like protein) (Importin-alpha re-exporter)	0.4	870	2200	0.95	0.95	0.91	0.962724	NTR	BioGrid	110.05	109.991	110.417		D.B. NTR	5029
CL1917Contig5	IMB_XENLA	IMB1_HUMAN	Importin subunit beta-1 (Importin-90) (Karyopherin subunit beta-1) (Nuclear factor p97) (Pore targeting complex 97 kDa subunit) (PTAC97)	-1.25	3300	180	0.32	0.71	5.4	7.70648	NTR		97.142	97.186	97.17		D.B. NTR	2503
TC450894	Q70PC5_XENLA	IMA7_HUMAN	Importin subunit alpha-7 (Karyopherin subunit alpha-6)	-0.7	430	87	70	0.32	5	15.6194	NTR		59.771	59.813	60.03		D.B. NTR	10686
CL258Contig7	Q6IRB7_XENLA	IMA4_HUMAN	Importin subunit alpha-4 (Importin alpha Q2) (Qip2) (Karyopherin subunit alpha-3) (SRP1-gamma)	-0.35	120	54				3.48831	NTR	Thakar	57.634	57.635	57.811		D.B. NTR	3726
CL838Contig1	Q7ZTI8_XENLA	IPO5_HUMAN	Importin-5 (Imp5) (Importin subunit beta-3) (Karyopherin beta-3) (Ran-binding protein 5) (RanBP5)	-1.48	700	23				0.689073	NTR		125.57	123.967	123.63		D.B. NTR	8121
CL6194Contig1	Q91349_XENLA	NUP62_HUMAN	Nuclear pore glycoprotein p62 (62 kDa nucleoporin) (Nucleoporin Nup62)	0.56	39	140	45	740	180	0.0250879	NUP	BioGrid	61.775	55.935	53.255		D.B. Nup	6956
CL3388Contig1	Q6DDV7_XENLA	NUP88_HUMAN	Nuclear pore complex protein Nup88 (88 kDa nucleoporin) (Nucleoporin Nup88)	1.64	0.6	28	3.2	740	56	0.0250879	NUP	BioGrid	82.445	82.446	83.542		D.B. Nup	4572
dsrrswapns_comp211456_c0_seq4	K9ZTJ6_XENLA	NUP54_HUMAN	Nucleoporin p54 (54 kDa nucleoporin)	0.54	22	76	35	740	37	0.0250879	NUP		58.464	58.562	55.435		D.B. Nup	9327
CL1693Contig3	A4FU91_XENLA	NUPL1_HUMAN	Nucleoporin p58/p45 (Nucleoporin-like protein 1)	0.44	22	60	7.9	740	21	0.0250879	NUP		39.99	60.309	60.897		D.B. Nup	2092
CL3011Contig2	Q9PVZ2_XENLA	NU214_HUMAN	Nuclear pore complex protein Nup214 (214 kDa nucleoporin) (Nucleoporin Nup214) (Protein CAN)	1.57	1.5	54	15	660	86	0.130523	NUP	BioGrid	208.63	208.933	213.62		D.B. Nup	4221
CL12880Contig1	F6UJB1_XENTR	GLE1_HUMAN	Nucleoporin GLE1 (hGLE1) (GLE1-like protein)	1.15	0.9	12	28	80	2	0.0250879	NUP		80.19		79.836		D.B. Nup	1185
CL1175Contig3	A8E620_XENLA	RBP2_HUMAN	E3 SUMO-protein ligase RanBP2 (EC 6.3.2.-) (358 kDa nucleoporin) (Nuclear pore complex protein Nup358) (Nucleoporin Nup358) (Ran-binding protein 2) (RanBP2) (p270)	0.99	4.3	42	5	77	200	2.65841	NUP		148.82	116.113	358.199		D.B. Nup	829
CL781Contig4	B3DLM1_XENLA	NUP98_HUMAN	Nuclear pore complex protein Nup98-Nup96 [Cleaved into: Nuclear pore complex protein Nup98 (98 kDa nucleoporin) (Nucleoporin Nup98) (Nup98); Nuclear pore complex protein Nup96 (96 kDa nucleoporin) (Nucleoporin Nup96) (Nup96)]	1.23	6.3	110	510	38	36	0.953026	NUP		195.05	135.146	197.579		D.B. Nup	7856
CL4515Contig1	Q66IZ6_XENLA	NUP37_HUMAN	Nucleoporin Nup37 (p37) (Nup107-160 subcomplex subunit Nup37)	0.59	39	150	1700	24	120	4.95925	NUP		36.544	36.545	36.708		D.B. Nup	5712
CL7418Contig1	A2RV69_XENLA	NU107_HUMAN	Nuclear pore complex protein Nup107 (107 kDa nucleoporin) (Nucleoporin Nup107)	0.6	31	120	910	15	65	4.38268	NUP		109.49	105.272	106.374		D.B. Nup	7648
CL5143Contig1	F7B7M1_XENTR	NU133_HUMAN	Nuclear pore complex protein Nup133 (133 kDa nucleoporin) (Nucleoporin Nup133)	0.54	36	120	440	9	31	3.45896	NUP		128.89		128.979		D.B. Nup	6218
CL722Contig3	Q6IRS1_XENLA	NU160_HUMAN	Nuclear pore complex protein Nup160 (160 kDa nucleoporin) (Nucleoporin Nup160)	0.72	21	110	570	8.7	41	4.66563	NUP	Thakar	162.54	104.766	162.121		D.B. Nup	7564
CL1560Contig3	Q642R6_XENLA	NU205_HUMAN	Nuclear pore complex protein Nup205 (205 kDa nucleoporin) (Nucleoporin Nup205)	0.33	45	96	2.4	6.9	0.17	0.0250879	NUP		227.59	227.596	227.922		D.B. Nup	1883
zeinaSSns_comp387970_c1_seq1	SEH1B_XENLA	SEH1_HUMAN	Nucleoporin SEH1 (Nup107-160 subcomplex subunit SEH1) (SEC13-like protein)	0.51	37	120	1400	5	99	19.7449	NUP		39.703	39.746	39.649		D.B. Nup	11133
CL9266Contig1	NUP85_XENLA	NUP85_HUMAN	Nuclear pore complex protein Nup85 (85 kDa nucleoporin) (FROUNT) (Nucleoporin Nup75) (Nucleoporin Nup85) (Pericentrin-1)	0.41	59	150	1300	5	96	19.3447	NUP		76.72	75.072	75.019		D.B. Nup	8513
CL6300Contig1	Q05AW3_XENLA	NUP43_HUMAN	Nucleoporin Nup43 (Nup107-160 subcomplex subunit Nup43) (p42)	0.35	120	280	2000	3.7	140	38.3774	NUP		41.682	41.697	42.151		D.B. Nup	7015
CL5153Contig1	NUP93_XENLA	NUP93_HUMAN	Nuclear pore complex protein Nup93 (93 kDa nucleoporin) (Nucleoporin Nup93)	0.16	120	180				1.33136	NUP	Thakar	93.443	93.454	93.488		D.B. Nup	6227
CL1223Contig1	Q7ZWL0_XENLA	NU155_HUMAN	Nuclear pore complex protein Nup155 (155 kDa nucleoporin) (Nucleoporin Nup155)	0.19	49	75				0.125622	NUP		154.76	34.513	155.199		D.B. Nup	999
CL566Contig3	Q6GQ01_XENLA	DOCK7_HUMAN	Dedicator of cytokinesis protein 7	-3	0.1	0	49	220	3.5	0.0157985	Ambiguous		237.91	76.466	242.561		D.C.	6590
CL10305Contig1	NPAT_XENLA	NPAT_HUMAN	Protein NPAT (Nuclear protein of the ataxia telangiectasia mutated locus) (Nuclear protein of the ATM locus) (p220)	2.86	0	30	30	98	2.2	0.0220478	Ambiguous		145.68	90.41	154.29		D.C.	298
CL4567Contig2	Q6NRX8_XENLA	TTF2_HUMAN	Transcription termination factor 2 (EC 3.6.4.-) (Lodestar homolog) (RNA polymerase II termination factor) (Transcription release factor 2) (F2) (HuF2)	-3	30	0	2.5	92	120	1.33577	Ambiguous		131.73	131.687	129.588		D.C.	5747
CL951Contig3	A9JS58_XENLA	WDR33_HUMAN	pre-mRNA 3' end processing protein WDR33 (WD repeat-containing protein 33) (WD repeat-containing protein WDC146)	0.59	9	35	5.6	89	24	0.268111	Ambiguous		183.35	35.986	145.891		D.C.	8624
CL3876Contig1	Q7ZXT1_XENLA	ARIP4_HUMAN	Helicase ARIP4 (EC 3.6.4.12) (Androgen receptor-interacting protein 4) (RAD54-like protein 2)	0.75	1.8	10	24	80	1.7	0.0213094	Ambiguous		157.38	45.645	162.769		D.C.	5092
CL6485Contig2	MCM9_XENLA	MCM9_HUMAN	DNA helicase MCM9 (hMCM9) (EC 3.6.4.12) (Mini-chromosome maintenance deficient domain-containing protein 1) (Minichromosome maintenance 9)	3	0	35	15	74	1	0.0140262	Ambiguous		126.59	126.594	127.313		D.C.	7134
CL1336Contig2	Q5XH69_XENLA	PEPL_HUMAN	Periplakin (190 kDa paraneoplastic pemphigus antigen) (195 kDa cornified envelope precursor protein)				31	72	2.2	0.0303322	Ambiguous		202.84	153.786	204.747		D.C.	1338
CL4315Contig1	F7BTW9_XENTR	SCYL2_HUMAN	SCY1-like protein 2 (Coated vesicle-associated kinase of 104 kDa)	-3	12	0	13	56	11	0.190489	Ambiguous		103.25	91.303	103.709		D.C.	5552
CL36Contig11	F7DC46_XENTR	ARI1A_HUMAN	AT-rich interactive domain-containing protein 1A (ARID domain-containing protein 1A) (B120) (BRG1-associated factor 250) (BAF250) (BRG1-associated factor 250a) (BAF250A) (Osa homolog 1) (hOSA1) (SWI-like protein) (SWI/SNF complex protein p270) (SWI/SNF-related, matrix-associated, actin-dependent regulator of chromatin subfamily F member 1) (hELD)	3	0	100	38	56	2.7	0.0482336	Ambiguous		220.56	41.988	242.045		D.C.	4918
CL1392Contig3	A1A5F0_XENTR	ZBT21_HUMAN	Zinc finger and BTB domain-containing protein 21 (Zinc finger protein 295)	3	0	7.9	32	54	2.3	0.0427118	Ambiguous		176.72	216.257	118.87		D.C.	1486
CL962Contig5	Q4V7W4_XENLA	ATX2L_HUMAN	Ataxin-2-like protein (Ataxin-2 domain protein) (Ataxin-2-related protein)	-3	4.5	0	40	52	2.9	0.0556297	Ambiguous		110.56	68.37	113.374		D.C.	8664
CL2689Contig1	TACC3_XENLA	TACC3_HUMAN	Transforming acidic coiled-coil-containing protein 3 (ERIC-1)	-3	180	0	3.1	41	1200	28.625	Ambiguous		102.58	102.541	90.36		D.C.	3856
CL19719Contig1	Q498E5_XENLA	DAAF1_HUMAN	Dynein assembly factor 1, axonemal (Leucine-rich repeat-containing protein 50)				13	37	0.94	0.0250879	Ambiguous		69.251	37.582	80.026		D.C.	2603
CL4598Contig1	COM1_XENLA	COM1_HUMAN	DNA endonuclease RBBP8 (EC 3.1.-.-) (CtBP-interacting protein) (CtIP) (Retinoblastoma-binding protein 8) (RBBP-8) (Retinoblastoma-interacting protein and myosin-like) (RIM) (Sporulation in the absence of SPO11 protein 2 homolog) (SAE2)	3	0	43	13	37	0.93	0.0250879	Ambiguous		98.291	98.292	101.942		D.C.	5773
CL3658Contig2		RBM44_HUMAN	RNA-binding protein 44 (RNA-binding motif protein 44)	-3	0.3	0	13	37	0.92	0.0250879	Ambiguous		149.1		117.985		D.C.	4864
zeinaSSns_comp387674_c1_seq1	F6ZZI3_XENTR	IFT81_HUMAN	Intraflagellar transport protein 81 homolog (Carnitine deficiency-associated protein expressed in ventricle 1) (CDV-1)	-0.88	17	2.2	13	37	0.92	0.0250879	Ambiguous		68.138		79.746		D.C.	11108
CL4859Contig1	Q2VPF9_XENLA	DDX54_HUMAN	ATP-dependent RNA helicase DDX54 (EC 3.6.4.13) (ATP-dependent RNA helicase DP97) (DEAD box RNA helicase 97 kDa) (DEAD box protein 54)	0.8	13	84	13	36	0.92	0.0250879	Ambiguous		94.849	94.85	98.595		D.C.	5987
CL15323Contig1	F6ZAD5_XENTR	CAYP2_HUMAN	Calcyphosin-2 (Calcyphosine-2)				13	36	0.9	0.0250879	Ambiguous		74.601	22.757	63.835		D.C.	1810
dsrrswapns_comp216886_c2_seq1	Q6DDR5_XENLA	PKH4B_HUMAN	Pleckstrin homology domain-containing family G member 4B (PH domain-containing family G member 4B)	-3	1.8	0	13	36	0.9	0.0250879	Ambiguous		215.29	69.819	139.667		D.C.	2232
CL4950Contig2	A1A636_XENLA	SGF29_HUMAN	SAGA-associated factor 29 homolog (Coiled-coil domain-containing protein 101)	1.78	0.6	38	13	36	0.9	0.0250879	Ambiguous		34.351	28.758	33.238		D.C.	6049
CL768Contig2	B1WBC6_XENLA	ATD2B_HUMAN	ATPase family AAA domain-containing protein 2B	1.6	0.8	33	13	36	0.9	0.0250879	Ambiguous		158.48	98.119	164.914		D.C.	7787
dsrrswapns_comp200975_c0_seq1	B5DEU0_XENTR	ACADV_HUMAN	Very long-chain specific acyl-CoA dehydrogenase, mitochondrial (VLCAD) (EC 1.3.8.9)				46	35	28	0.79222	Ambiguous		73.106	68.43	70.39	MT	D.C.	9080
CL1018Contig4	Q6GPW8_XENLA	KAT7_HUMAN	Histone acetyltransferase KAT7 (EC 2.3.1.48) (Histone acetyltransferase binding to ORC1) (Lysine acetyltransferase 7) (MOZ, YBF2/SAS3, SAS2 and TIP60 protein 2) (MYST-2)	3	0	2.3	12	35	0.88	0.0250879	Ambiguous		70.292	50.304	70.642		D.C.	257
dsrrswapns_comp198197_c0_seq2	SMC5_XENLA	SMC5_HUMAN	Structural maintenance of chromosomes protein 5 (SMC protein 5) (SMC-5) (hSMC5)	2.37	0.2	58	12	35	0.87	0.0250879	Ambiguous		130.33	124.938	128.806		D.C.	9069
dsrrswapns_comp217234_c3_seq17	F7DRH5_XENTR	KIF1B_HUMAN	Kinesin-like protein KIF1B (Klp)	-3	0.1	0	12	34	0.85	0.0250879	Ambiguous		94.128	215.936	204.476		D.C.	3132
CL626Contig6	SP13B_XENLA	SP130_HUMAN	Histone deacetylase complex subunit SAP130 (130 kDa Sin3-associated polypeptide) (Sin3-associated polypeptide p130)	3	0	10	12	33	0.83	0.0250879	Ambiguous		109.99	109.991	110.324		D.C.	6991
CL12853Contig1	Q6GL30_XENTR	DUS11_HUMAN	RNA/RNP complex-1-interacting phosphatase (EC 3.1.3.-) (Dual specificity protein phosphatase 11) (Phosphatase that interacts with RNA/RNP complex 1)	3	0	28	11	32	0.81	0.0250879	Ambiguous		71.775	35.439	38.939		D.C.	1177
dsrrswapns_comp211630_c0_seq4	F6ZEB9_XENTR	ARAP3_HUMAN	Arf-GAP with Rho-GAP domain, ANK repeat and PH domain-containing protein 3 (Centaurin-delta-3) (Cnt-d3)				11	32	0.8	0.0250879	Ambiguous		203.82	43.519	169.844		D.C.	7034
CL1603Contig4	Q6GPV2_XENLA	NPA1P_HUMAN	Nucleolar pre-ribosomal-associated protein 1 (Nucleolar protein 254 kDa) (URB1 ribosome biogenesis 1 homolog)	2.69	0.1	43	11	31	0.78	0.0250879	Ambiguous		258.09	102.334	254.389		D.C.	1966
CL2666Contig2	F6QGF2_XENTR	CABIN_HUMAN	Calcineurin-binding protein cabin-1 (Calcineurin inhibitor) (CAIN)	2.42	0	12	11	31	0.78	0.0250879	Ambiguous		241.74		246.352		D.C.	3832
CL714Contig3	Q6DD79_XENLA	LIPB1_HUMAN	Liprin-beta-1 (Protein tyrosine phosphatase receptor type f polypeptide-interacting protein-binding protein 1) (PTPRF-interacting protein-binding protein 1) (hSGT2)	-1.24	1.2	0.1	11	31	0.78	0.0250879	Ambiguous		108.56	108.708	114.024		D.C.	7534
CL3853Contig1	CPE1B_XENLA	CPEB1_HUMAN	Cytoplasmic polyadenylation element-binding protein 1 (CPE-BP1) (CPE-binding protein 1) (h-CPEB) (hCPEB-1)	-1.81	480	7.5	7.8	30	4700	156.136	Ambiguous	NESdbO	62.631	62.632	62.595		D.C.	5063
CL9634Contig1	F7A9L2_XENTR	MOV10_HUMAN	Putative helicase MOV-10 (EC 3.6.4.13) (Moloney leukemia virus 10 protein)	-2.99	230	0.2	5.8	30	2800	91.0753	Ambiguous		112.24	121.959	113.671		D.C.	8668
dsrrswapns_comp216438_c2_seq7	F8UGT8_XENTR	CASC5_HUMAN	Protein CASC5 (ALL1-fused gene from chromosome 15q14 protein) (AF15q14) (Bub-linking kinetochore protein) (Blinkin) (Cancer susceptibility candidate gene 5 protein) (Cancer/testis antigen 29) (CT29) (Kinetochore-null protein 1) (Protein D40/AF15q14)	3	0	10	11	30	0.76	0.0250879	Ambiguous		127.18		265.391		D.C.	9713
CL6197Contig1	F6ZTK9_XENTR	CTTB2_HUMAN	Cortactin-binding protein 2 (CortBP2)				6.7	30	0.76	0.0250879	Ambiguous		173.38	31.165	181.051		D.C.	6957
CL833Contig4	F7DLX8_XENTR	HP1B3_HUMAN	Heterochromatin protein 1-binding protein 3 (Protein HP1-BP74)	2.01	0.4	44	10	30	0.74	0.0250879	Ambiguous		57.27		61.207		D.C.	8102
CL3502Contig1	F6VGG5_XENTR	TEP1_HUMAN	Telomerase protein component 1 (Telomerase-associated protein 1) (Telomerase protein 1) (p240) (p80 telomerase homolog)	-1.53	16	0.5	10	29	0.73	0.0250879	Ambiguous		238.33	141.575	290.49		D.C.	4685
CL2247Contig2	F6Y6A2_XENTR	YLPM1_HUMAN	YLP motif-containing protein 1 (Nuclear protein ZAP3) (ZAP113)	3	0	53	10	29	0.72	0.0250879	Ambiguous		142.91		219.985		D.C.	3253
CL13180Contig1		TTI2_HUMAN	TELO2-interacting protein 2	-3	0.7	0	9.8	28	0.7	0.0250879	Ambiguous		38.721		56.915		D.C.	1271
CL427Contig10	A9JS39_XENLA	SCAFB_HUMAN	Protein SCAF11 (CTD-associated SR protein 11) (Renal carcinoma antigen NY-REN-40) (SC35-interacting protein 1) (SR-related and CTD-associated factor 11) (SRSF2-interacting protein) (Serine/arginine-rich splicing factor 2-interacting protein) (Splicing factor, arginine/serine-rich 2-interacting protein) (Splicing regulatory protein 129) (SRrp129)	3	0	57	9.8	28	0.7	0.0250879	Ambiguous		194.02	22.871	164.652		D.C.	5512
CL10166Contig1	F7EIZ8_XENTR	CDK13_HUMAN	Cyclin-dependent kinase 13 (EC 2.7.11.22) (EC 2.7.11.23) (CDC2-related protein kinase 5) (Cell division cycle 2-like protein kinase 5) (Cell division protein kinase 13) (hCDK13) (Cholinesterase-related cell division controller)	3	0	38	9.7	28	0.69	0.0250879	Ambiguous		155.1	356.969	164.923		D.C.	248
dsrrswapns_comp211386_c0_seq3	F6SEQ0_XENTR	TSNA1_HUMAN	t-SNARE domain-containing protein 1				9.7	28	0.69	0.0250879	Ambiguous		75.427		55.949	TM	D.C.	9320
CL6270Contig1	Q68F10_XENLA	CSTF2_HUMAN	Cleavage stimulation factor subunit 2 (CF-1 64 kDa subunit) (Cleavage stimulation factor 64 kDa subunit) (CSTF 64 kDa subunit) (CstF-64)	0.31	120	250	4.7	27	390	14.2859	Ambiguous		52.738	52.738	60.959		D.C.	6992
zeinaSSns_comp387199_c0_seq6	UTP15_XENLA	UTP15_HUMAN	U3 small nucleolar RNA-associated protein 15 homolog	1.53	1.2	42	9.6	27	0.69	0.0250879	Ambiguous		58.123	58.235	58.415		D.C.	11085
CL7597Contig1	INTU_XENLA	INTU_HUMAN	Protein inturned (Inturned planar cell polarity effector homolog) (PDZ domain-containing protein 6)				9.5	27	0.68	0.0250879	Ambiguous		106.72	106.835	105.648		D.C.	7732
TC413823	Q52L27_XENLA	CHD1_HUMAN	Chromodomain-helicase-DNA-binding protein 1 (CHD-1) (EC 3.6.4.12) (ATP-dependent helicase CHD1)	3	0	13	9.5	27	0.68	0.0250879	Ambiguous		207.3	161.691	196.688		D.C.	10401
CL1375Contig6	F6Q2W5_XENTR	EVI5_HUMAN	Ecotropic viral integration site 5 protein homolog (EVI-5) (Neuroblastoma stage 4S gene protein)	-3	0.8	0	9.4	27	0.67	0.0250879	Ambiguous		87.279	120.49	92.949		D.C.	1441
CL3518Contig1	Q6DDL4_XENLA	DDX24_HUMAN	ATP-dependent RNA helicase DDX24 (EC 3.6.4.13) (DEAD box protein 24)	2.6	0.1	55	9.4	27	0.67	0.0250879	Ambiguous		89.301	79.914	96.332		D.C.	4704
CL3693Contig3	Q5XGZ1_XENLA	CPSF3_HUMAN	Cleavage and polyadenylation specificity factor subunit 3 (EC 3.1.27.-) (Cleavage and polyadenylation specificity factor 73 kDa subunit) (CPSF 73 kDa subunit) (mRNA 3'-end-processing endonuclease CPSF-73)	0.33	68	150	2.4	26	420	16.4967	Ambiguous		78.207	78.208	77.486		D.C.	4908
CL324Contig3	Q66IU7_XENLA	MYCB2_HUMAN	E3 ubiquitin-protein ligase MYCBP2 (EC 6.3.2.-) (Myc-binding protein 2) (Pam/highwire/rpm-1 protein) (Protein associated with Myc)	-1.12	6.7	0.5	9	26	0.65	0.0250879	Ambiguous		472.01	40.246	510.084		D.C.	4435
CL1104Contig2	F6Q3J8_XENTR	PPRC1_HUMAN	Peroxisome proliferator-activated receptor gamma coactivator-related protein 1 (PGC-1-related coactivator) (PRC)	3	0	3.1	9	26	0.64	0.0250879	Ambiguous		182.6	94.412	177.544		D.C.	564
CL3129Contig2	Q4FZW8_XENLA	PWP2_HUMAN	Periodic tryptophan protein 2 homolog	1.84	2.7	190	8.7	25	0.63	0.0250879	Ambiguous		99.417	99.36	102.452		D.C.	4337
CL513Contig5	F7CIW3_XENTR	VIR_HUMAN	Protein virilizer homolog	3	0	26	8.5	24	0.61	0.0250879	Ambiguous		175.22		202.025		D.C.	6213
CL5387Contig1	DEN1A_XENLA	DEN1A_HUMAN	DENN domain-containing protein 1A (Connecdenn 1) (Connecdenn) (Protein FAM31A)	-3	0.9	0	8.4	24	0.6	0.0250879	Ambiguous		112.38	112.377	110.577		D.C.	6401
CL5145Contig1	SYMPK_XENLA	SYMPK_HUMAN	Symplekin	0.16	64	93	6.1	23	270	12.0291	Ambiguous		134.45	134.452	141.148		D.C.	6220
CL2759Contig2	Q6PA30_XENLA	CPSF1_HUMAN	Cleavage and polyadenylation specificity factor subunit 1 (Cleavage and polyadenylation specificity factor 160 kDa subunit) (CPSF 160 kDa subunit)	0.9	17	140	4.4	23	160	6.9121	Ambiguous		160.55	40.564	160.884		D.C.	3935
CL6945Contig1	F7EK96_XENTR	NPHP4_HUMAN	Nephrocystin-4 (Nephroretinin)				8.1	23	0.58	0.0250879	Ambiguous		162.92		157.598		D.C.	7409
CL708Contig3	Q1W3Z6_XENLA	NCOR2_HUMAN	Nuclear receptor corepressor 2 (N-CoR2) (CTG repeat protein 26) (SMAP270) (Silencing mediator of retinoic acid and thyroid hormone receptor) (SMRT) (T3 receptor-associating factor) (TRAC) (Thyroid-, retinoic-acid-receptor-associated corepressor)	2.53	0.1	22	8	23	0.58	0.0250879	Ambiguous		273.69	273.605	274.804		D.C.	7499
CL164Contig15	R4IZH5_XENLA	TUT7_HUMAN	Terminal uridylyltransferase 7 (TUTase 7) (EC 2.7.7.52) (Zinc finger CCHC domain-containing protein 6)				8	23	0.57	0.0250879	Ambiguous		134.4	66.444	171.229		D.C.	2031
CL7768Contig1	A0JPA3_XENTR	KIF17_HUMAN	Kinesin-like protein KIF17 (KIF3-related motor protein)	-3	0.5	0	8	23	0.57	0.0250879	Ambiguous		90.407	79.664	115.068		D.C.	7827
CL9106Contig1	Q6IRP3_XENLA	EDRF1_HUMAN	Erythroid differentiation-related factor 1	-3	0.2	0	7.9	23	0.57	0.0250879	Ambiguous		133.17	77.129	138.528		D.C.	8440
CL3815Contig1	F6TPR8_XENTR	YTDC2_HUMAN	Probable ATP-dependent RNA helicase YTHDC2 (EC 3.6.4.13)	-3	2.7	0	7.8	22	0.56	0.0250879	Ambiguous		159.02	153.318	160.248		D.C.	5030
CL852Contig8	MIB1_XENLA	MIB1_HUMAN	E3 ubiquitin-protein ligase MIB1 (EC 6.3.2.-) (DAPK-interacting protein 1) (DIP-1) (Mind bomb homolog 1) (Zinc finger ZZ type with ankyrin repeat domain protein 2)	-0.8	0.6	0.1	7.8	22	0.56	0.0250879	Ambiguous		110.77	110.689	110.136		D.C.	8183
CL2793Contig3				-3	1.4	0	16	21	1.1	0.0548183	Ambiguous		175.17				D.C.	3971
CL3880Contig2	Q6NU01_XENLA	KANL3_HUMAN	KAT8 regulatory NSL complex subunit 3 (NSL complex protein NSL3) (Non-specific lethal 3 homolog) (Serum inhibited-related protein) (Testis development protein PRTD)	3	0	6.3	7.4	21	0.53	0.0250879	Ambiguous		115.9	115.905	95.992		D.C.	5101
CL1508Contig7	F7EGS8_XENTR	RTEL1_HUMAN	Regulator of telomere elongation helicase 1 (EC 3.6.4.12) (Novel helicase-like)	2.63	0.2	72	7.3	21	0.53	0.0250879	Ambiguous		135.51	81.044	133.683		D.C.	1754
CL3744Contig1	F7E0B3_XENTR	ANKL2_HUMAN	Ankyrin repeat and LEM domain-containing protein 2 (LEM domain-containing protein 4)				2.6	20	3.7	0.185901	Ambiguous		106.96		104.114	TM	D.C.	4967
CL1Contig624	NOL6_XENLA	NOL6_HUMAN	Nucleolar protein 6 (Nucleolar RNA-associated protein) (Nrap)	3	0	130	7.2	20	0.51	0.0250879	Ambiguous		129.84	129.852	127.593		D.C.	2846
zeinaSSns_comp389597_c4_seq7	F208A_XENLA	F208A_HUMAN	Protein FAM208A (CTCL tumor antigen se89-1) (Retinoblastoma-associated protein RAP140)	3	0	31	7.1	20	0.51	0.0250879	Ambiguous		165.16	176.403	189.032		D.C.	11298
CL235Contig2	A9UMQ1_XENLA	GON4L_HUMAN	GON-4-like protein (GON-4 homolog)	3	0	1.3	7	20	0.5	0.0250879	Ambiguous		209.3	80.762	248.62		D.C.	3399
CL277Contig6	Q801N0_XENLA	PRC2B_HUMAN	Protein PRRC2B (HLA-B-associated transcript 2-like 1) (Proline-rich coiled-coil protein 2B)	-3	0.3	0	6.9	20	0.5	0.0250879	Ambiguous		236.3	53.257	242.967		D.C.	3953
CL236Contig5	Q4V7I4_XENLA			-3	0.06	0	5.7	20	0.41	0.0202191	Ambiguous		138.84	47.2			D.C.	3417
CL5245Contig3	Q98T92_XENLA	TTK_HUMAN	Dual specificity protein kinase TTK (EC 2.7.12.1) (Phosphotyrosine picked threonine-protein kinase) (PYT)	-0.08	2.8	2.3	6.8	19	0.49	0.0250879	Ambiguous		98.029	99.079	97.072		D.C.	6295
CL136Contig6	Q2TAF1_XENLA	TR150_HUMAN	Thyroid hormone receptor-associated protein 3 (Thyroid hormone receptor-associated protein complex 150 kDa component) (Trap150)	3	0	13	6.7	19	0.48	0.0250879	Ambiguous		105.17	105.5	108.666		D.C.	1425
CL224Contig3	NCOR1_XENLA	NCOR1_HUMAN	Nuclear receptor corepressor 1 (N-CoR) (N-CoR1)	3	0	22	7.3	18	0.52	0.0289961	Ambiguous		279.74	277.828	270.21		D.C.	3256
CL1Contig641	F6U4Y5_XENTR	BMS1_HUMAN	Ribosome biogenesis protein BMS1 homolog (Ribosome assembly protein BMS1 homolog)	1.96	1.6	150	6.3	18	0.45	0.0250879	Ambiguous		143.99	138.555	145.807		D.C.	2848
CL6591Contig1	Q5XG51_XENLA	RRP12_HUMAN	RRP12-like protein				40	17	2.8	0.166615	Ambiguous	Thakar	143.69	131.797	143.702	TM	D.C.	7207
CL163Contig1		ZN318_HUMAN	Zinc finger protein 318 (Endocrine regulatory protein)	2.27	0.4	69	6.1	17	0.44	0.0250879	Ambiguous		199.9		251.112		D.C.	2018
CL8170Contig2	Q6INQ5_XENLA	NPHP1_HUMAN	Nephrocystin-1 (Juvenile nephronophthisis 1 protein)	-0.58	1.9	0.5	6.1	17	0.44	0.0250879	Ambiguous		78.402	78.403	83.299		D.C.	8022
CL145Contig8	F6YH53_XENTR	AMRA1_HUMAN	Activating molecule in BECN1-regulated autophagy protein 1	1.39	0.4	9.6	5.9	17	0.43	0.0250879	Ambiguous		142.68		142.507		D.C.	1637
CL2439Contig4	Q561L7_XENLA	MYPT1_HUMAN	Protein phosphatase 1 regulatory subunit 12A (Myosin phosphatase-targeting subunit 1) (Myosin phosphatase target subunit 1) (Protein phosphatase myosin-binding subunit)	-3	1.1	0	5.9	17	0.43	0.0250879	Ambiguous		114.74	100.699	115.281		D.C.	3488
CL11907Contig1	A9UMQ0_XENLA	PNKP_HUMAN	Bifunctional polynucleotide phosphatase/kinase (DNA 5'-kinase/3'-phosphatase) (Polynucleotide kinase-3'-phosphatase) [Includes: Polynucleotide 3'-phosphatase (EC 3.1.3.32) (2'(3')-polynucleotidase); Polynucleotide 5'-hydroxyl-kinase (EC 2.7.1.78)]	2.88	0.3	270	5.9	17	0.42	0.0250879	Ambiguous		65.763	278.479	57.076		D.C.	887
CL29Contig14	Q7ZXJ0_XENLA	DDX3X_HUMAN	ATP-dependent RNA helicase DDX3X (EC 3.6.4.13) (DEAD box protein 3, X-chromosomal) (DEAD box, X isoform) (Helicase-like protein 2) (HLP2)	2.58	1.1	410	4.3	16	860	54.3088	Ambiguous	NESdbX, Thakar	77.132	77.133	73.243		D.C.	4191
CL1720Contig1	SMO2A_XENLA	SUMO2_HUMAN	Small ubiquitin-related modifier 2 (SUMO-2) (HSMT3) (SMT3 homolog 2) (SUMO-3) (Sentrin-2) (Ubiquitin-like protein SMT3B) (Smt3B)	1.2	100	1700	1.9	16	200	12.1378	Ambiguous	BioGrid	10.82	10.82	10.871		D.C.	2152
CL256Contig6	P70012_XENLA	NUMA1_HUMAN	Nuclear mitotic apparatus protein 1 (NuMA protein) (Nuclear matrix protein-22) (NMP-22) (SP-H antigen)	1.65	1.6	69	28	16	2	0.125817	Ambiguous		256.79	256.797	238.26		D.C.	3687
CL1649Contig3	Q5XGV6_XENLA	TIF1A_HUMAN	Transcription intermediary factor 1-alpha (TIF1-alpha) (EC 6.3.2.-) (E3 ubiquitin-protein ligase TRIM24) (RING finger protein 82) (Tripartite motif-containing protein 24)	3	0	43	10	15	0.72	0.0470333	Ambiguous		116.62	49.635	116.831		D.C.	2029
CL2245Contig1	Q6NRN1_XENLA	GRDN_HUMAN	Girdin (Akt phosphorylation enhancer) (APE) (Coiled-coil domain-containing protein 88A) (G alpha-interacting vesicle-associated protein) (GIV) (Girders of actin filament) (Hook-related protein 1) (HkRP1)	-3	0.8	0	5.3	15	0.38	0.0250879	Ambiguous		209.65	115.338	216.042		D.C.	3252
CL615Contig1	RHG32_XENLA	RHG32_HUMAN	Rho GTPase-activating protein 32 (Brain-specific Rho GTPase-activating protein) (GAB-associated Cdc42/Rac GTPase-activating protein) (GC-GAP) (GTPase regulator interacting with TrkA) (Rho-type GTPase-activating protein 32) (Rho/Cdc42/Rac GTPase-activating protein RICS) (RhoGAP involved in the beta-catenin-N-cadherin and NMDA receptor signaling) (p200RhoGAP) (p250GAP)				5.3	15	0.38	0.0250879	Ambiguous		216.02	216.024	230.529		D.C.	6933
CL1072Contig1	A1L1G6_XENLA	GSE1_HUMAN	Genetic suppressor element 1	3	0	2.2	5.2	15	0.38	0.0250879	Ambiguous		138.42	129.507	136.164		D.C.	455
CL2023Contig4	A4FVE3_XENLA	RTF1_HUMAN	RNA polymerase-associated protein RTF1 homolog	3	0	150	34	14	2.4	0.175231	Ambiguous		76.805	23.119	80.313		D.C.	2935
CL7643Contig1	F6YVR0_XENTR	KIF27_HUMAN	Kinesin-like protein KIF27	-3	0.9	0	26	14	1.9	0.135683	Ambiguous		159.01	64.441	160.283		D.C.	7766
CL7469Contig1	A3KNE3_XENLA	DHX37_HUMAN	Probable ATP-dependent RNA helicase DHX37 (EC 3.6.4.13) (DEAH box protein 37)	3	0	230	23	14	1.6	0.113192	Ambiguous		128.92	17.381	129.545		D.C.	7668
CL4509Contig3	A1L2U5_XENLA	DHX30_HUMAN	Putative ATP-dependent RNA helicase DHX30 (EC 3.6.4.13) (DEAH box protein 30)	-3	1.1	0	5	14	0.36	0.0250879	Ambiguous		133.79	74.834	133.938		D.C.	5703
CL261Contig3	F6ZV90_XENTR	AHNK_HUMAN	Neuroblast differentiation-associated protein AHNAK (Desmoyokin)	-3	13	0	14	13	1	0.080649	Ambiguous		93.193		629.101		D.C.	3772
CL2010Contig1	F7E426_XENTR	EPS15_HUMAN	Epidermal growth factor receptor substrate 15 (Protein Eps15) (Protein AF-1p)	-3	26	0	4.7	13	0.33	0.0250879	Ambiguous	NESdbO	107.11	99.549	98.656		D.C.	2915
zeinaSSns_comp386928_c0_seq4	F92AA_XENLA	F92A1_HUMAN	Protein FAM92A1	0.49	2.2	6.8	4.6	13	0.33	0.0250879	Ambiguous		32.901	32.872	33.431		D.C.	6483
CL1858Contig3	A0JLZ0_XENTR	UBP19_HUMAN	Ubiquitin carboxyl-terminal hydrolase 19 (EC 3.4.19.12) (Deubiquitinating enzyme 19) (Ubiquitin thioesterase 19) (Ubiquitin-specific-processing protease 19) (Zinc finger MYND domain-containing protein 9)				4.5	13	0.32	0.0250879	Ambiguous		147.8	110.496	145.651	TM	D.C.	2387
CL19345Contig1	F7EAJ2_XENTR	DDX28_HUMAN	Probable ATP-dependent RNA helicase DDX28 (EC 3.6.4.13) (Mitochondrial DEAD box protein 28)				4.4	13	0.31	0.0250879	Ambiguous		57.526	50.25	59.581		D.C.	2548
CL7224Contig1	F6YIH9_XENTR	ULK4_HUMAN	Serine/threonine-protein kinase ULK4 (EC 2.7.11.1) (Unc-51-like kinase 4)	-3	1.8	0	46	12	3.3	0.275393	Ambiguous		141.65	53.127	142.442		D.C.	7563
CL1091Contig1	ATG2A_XENTR	ATG2A_HUMAN	Autophagy-related protein 2 homolog A	-3	1.2	0	4.4	12	0.31	0.0250879	Ambiguous		221.94	165.824	212.86		D.C.	530
CL19282Contig1	B2GU92_XENTR	KRIT1_HUMAN	Krev interaction trapped protein 1 (Krev interaction trapped 1) (Cerebral cavernous malformations 1 protein)	-3	0.1	0	4.2	12	0.3	0.0250879	Ambiguous		84.83	51.584	84.348		D.C.	2531
CL4325Contig1	Q6NTQ1_XENLA	FP100_HUMAN	Fanconi anemia-associated protein of 100 kDa	2.29	0.4	77	4	12	0.29	0.0250879	Ambiguous		94.757	89.242	93.433		D.C.	5561
CL923Contig3	F7EJE8_XENTR	MY18A_HUMAN	Unconventional myosin-XVIIIa (Molecule associated with JAK3 N-terminus) (MAJN) (Myosin containing a PDZ domain)	-1.11	2.4	0.2	40	11	2.9	0.268017	Ambiguous		280.21	231.095	233.115		D.C.	8503
CL4690Contig1	Q5XHA7_XENLA	RIOK2_HUMAN	Serine/threonine-protein kinase RIO2 (EC 2.7.11.1) (RIO kinase 2)	-1.08	9.2	0.8	37	11	2.6	0.240924	Ambiguous	NESdbO, Thakar	63.081	63.082	63.283		D.C.	5855
CL1Contig1661	F6U4J2_XENTR	UBN2_HUMAN	Ubinuclein-2	3	0	17	3.9	11	0.28	0.0250879	Ambiguous		127.45		146.089		D.C.	2750
CL563Contig2	DD21B_XENLA	DDX21_HUMAN	Nucleolar RNA helicase 2 (EC 3.6.4.13) (DEAD box protein 21) (Gu-alpha) (Nucleolar RNA helicase Gu) (Nucleolar RNA helicase II) (RH II/Gu)	2.24	1	180	3.8	11	0.27	0.0250879	Ambiguous		93.954	89.378	87.344		D.C.	6575
CL16822Contig1	F6U1V2_XENTR	DEN4B_HUMAN	DENN domain-containing protein 4B				3.7	10	0.26	0.0250879	Ambiguous		127.48	210.866	163.847		D.C.	2073
CL1207Contig8	F6U9R7_XENTR	ZC3H1_HUMAN	Zinc finger C3H1 domain-containing protein (Coiled-coil domain-containing protein 131) (Proline/serine-rich coiled-coil protein 2)	3	0	13	3.6	10	0.26	0.0250879	Ambiguous		199.83	27.178	226.356		D.C.	957
CL2541Contig1	F7B2Z4_XENTR	DOCK5_HUMAN	Dedicator of cytokinesis protein 5	-3	2.3	0	3.5	10	0.25	0.0250879	Ambiguous		212.14		215.309		D.C.	3649
CL3245Contig2	A9UM80_XENTR	F91A1_HUMAN	Protein FAM91A1	-3	8.2	0	23	9.9	1.7	0.16911	Ambiguous		94.167		93.909		D.C.	4431
CL9410Contig1	F6QZZ9_XENTR	NOL8_HUMAN	Nucleolar protein 8 (Nucleolar protein Nop132)	3	0	31	3.4	9.8	0.25	0.0250879	Ambiguous		122.51		131.616		D.C.	8586
CL2103Contig2	BAZ1B_XENLA	BAZ1B_HUMAN	Tyrosine-protein kinase BAZ1B (EC 2.7.10.2) (Bromodomain adjacent to zinc finger domain protein 1B) (Williams syndrome transcription factor) (Williams-Beuren syndrome chromosomal region 10 protein) (Williams-Beuren syndrome chromosomal region 9 protein) (hWALp2)	2.16	0.8	120	44	9.4	3.2	0.339254	Ambiguous		166.26	166.153	170.903		D.C.	3055
zeinaSSns_comp386267_c0_seq1	F6ZN18_XENTR	SHRM2_HUMAN	Protein Shroom2 (Apical-like protein) (Protein APXL)				3.1	8.9	0.22	0.0250879	Ambiguous		185.07	159.468	176.41		D.C.	9480
CL3509Contig5	Q6NRX7_XENLA	PTN12_HUMAN	Tyrosine-protein phosphatase non-receptor type 12 (EC 3.1.3.48) (PTP-PEST) (Protein-tyrosine phosphatase G1) (PTPG1)	-3	5.3	0	26	8.8	1.9	0.212681	Ambiguous		79.039	74.141	88.106		D.C.	4692
CL3088Contig2	F7ENI7_XENTR	RICTR_HUMAN	Rapamycin-insensitive companion of mTOR (AVO3 homolog) (hAVO3)				3.1	8.7	0.22	0.0250879	Ambiguous		167.61		192.218		D.C.	4302
dsrrswapns_comp209571_c0_seq1	F7DQ75_XENTR	TDR15_HUMAN	Tudor domain-containing protein 15				3	8.6	0.21	0.0250879	Ambiguous		201.7	216.262	221.722		D.C.	9227
TC463553	F6SYJ8_XENTR			3	0	230	24	8.1	1.7	0.210158	Ambiguous		17.759				D.C.	10779
CL4561Contig1	D0VEW8_XENLA	DPOLZ_HUMAN	DNA polymerase zeta catalytic subunit (EC 2.7.7.7) (Protein reversionless 3-like) (REV3-like) (hREV3)	1.17	0.2	2.6	4.2	8.1	0.3	0.0370233	Ambiguous		352.6	352.607	352.776		D.C.	5745
CL1044Contig5	F7BSM4_XENTR	ADNP_HUMAN	Activity-dependent neuroprotector homeobox protein (Activity-dependent neuroprotective protein)	2.23	0.9	160	30	8	2.2	0.26963	Ambiguous		122.8	314.461	123.563		D.C.	361
zeinaSSns_comp389400_c0_seq4	B1H1Y9_XENLA	PHRF1_HUMAN	PHD and RING finger domain-containing protein 1	1.45	0.8	23	2.7	7.7	0.19	0.0250879	Ambiguous		196.32	128.773	178.666		D.C.	2759
CL2139Contig2	F7CD71_XENTR	FOCAD_HUMAN	Focadhesin				9.3	7.4	0.66	0.0899601	Ambiguous		200.21		200.072	TM	D.C.	3110
CL3176Contig1	F7AI53_XENTR	HEAT1_HUMAN	HEAT repeat-containing protein 1 (Protein BAP28) [Cleaved into: HEAT repeat-containing protein 1, N-terminally processed]	1.56	1.9	70	2.5	7.2	0.18	0.0250879	Ambiguous		242.68		242.37		D.C.	4385
CL8378Contig1	Q505M7_XENLA	IVD_HUMAN	Isovaleryl-CoA dehydrogenase, mitochondrial (IVD) (EC 1.3.8.4)				20	7	48	6.88996	Ambiguous		48.027	45.541	46.319	MT	D.C.	8115
CL113Contig2	Q5U4U8_XENLA	PB1_HUMAN	Protein polybromo-1 (hPB1) (BRG1-associated factor 180) (BAF180) (Polybromo-1D)	3	0	110	26	6.9	1.8	0.266858	Ambiguous		189.43	102.38	192.948		D.C.	694
TC413539	CAMP1_XENLA	CAMP1_HUMAN	Calmodulin-regulated spectrin-associated protein 1	-3	4.9	0	25	6.9	1.8	0.258968	Ambiguous		175.93	175.934	177.972		D.C.	10397
zeinaSSns_comp381551_c0_seq1	SUMO3_XENLA	SUMO3_HUMAN	Small ubiquitin-related modifier 3 (SUMO-3) (SMT3 homolog 1) (SUMO-2) (Ubiquitin-like protein SMT3A) (Smt3A)	0.79	630	3900	1.7	6.8	1300	186.084	Ambiguous	BioGrid	10.713	10.713	11.637		D.C.	10924
CL6336Contig2	Q5U555_XENLA	NDUS3_HUMAN	NADH dehydrogenase [ubiquinone] iron-sulfur protein 3, mitochondrial (EC 1.6.5.3) (EC 1.6.99.3) (Complex I-30kD) (CI-30kD) (NADH-ubiquinone oxidoreductase 30 kDa subunit)				28	6.6	13	2.02551	Ambiguous		28.716	28.586	30.242	MT	D.C.	7038
CL10089Contig1	Q6DDN5_XENLA	TF3C5_HUMAN	General transcription factor 3C polypeptide 5 (TF3C-epsilon) (Transcription factor IIIC 63 kDa subunit) (TFIIIC 63 kDa subunit) (TFIIIC63) (Transcription factor IIIC subunit epsilon)	0.81	4.1	27	2.2	6.3	0.16	0.0250879	Ambiguous		58.831	129.195	59.571		D.C.	211
CL6298Contig1	Q5U4J2_XENLA	TAF1_HUMAN	Transcription initiation factor TFIID subunit 1 (EC 2.3.1.48) (EC 2.7.11.1) (Cell cycle gene 1 protein) (TBP-associated factor 250 kDa) (p250) (Transcription initiation factor TFIID 250 kDa subunit) (TAF(II)250) (TAFII-250) (TAFII250)	1.9	0.1	6.1	2.2	6.3	0.16	0.0250879	Ambiguous		222.2	43.116	212.677		D.C.	7006
CL4775Contig3	WTIP_XENLA	WTIP_HUMAN	Wilms tumor protein 1-interacting protein (WT1-interacting protein)				2	5.8	0.15	0.0250879	Ambiguous		76.322	75.335	45.124		D.C.	5921
CL855Contig2	F7ALH1_XENTR	BIRC6_HUMAN	Baculoviral IAP repeat-containing protein 6 (EC 6.3.2.-) (BIR repeat-containing ubiquitin-conjugating enzyme) (BRUCE) (Ubiquitin-conjugating BIR domain enzyme apollon) (APOLLON)	-3	5	0	1.7	5.8	0.12	0.0214887	Ambiguous		526.82	35.11	530.255		D.C.	8198
CL10198Contig1	F6T8I8_XENTR	UBR3_HUMAN	E3 ubiquitin-protein ligase UBR3 (EC 6.3.2.-) (N-recognin-3) (Ubiquitin-protein ligase E3-alpha-3) (Ubiquitin-protein ligase E3-alpha-III) (Zinc finger protein 650)				19	5.6	1.4	0.249447	Ambiguous		209.83	11.64	212.433	TM	D.C.	258
CL4367Contig1	Q8UVY7_XENLA	RPA1_HUMAN	DNA-directed RNA polymerase I subunit RPA1 (RNA polymerase I subunit A1) (EC 2.7.7.6) (A190) (DNA-directed RNA polymerase I largest subunit) (DNA-directed RNA polymerase I subunit A) (RNA polymerase I 194 kDa subunit) (RPA194)	2.64	0.2	68	36	5.2	2.6	0.505633	Ambiguous		195.18	195.212	194.811		D.C.	5588
CL3807Contig2	SIR5A_XENLA	SIR5_HUMAN	NAD-dependent protein deacylase sirtuin-5, mitochondrial (EC 3.5.1.-) (Regulatory protein SIR2 homolog 5) (SIR2-like protein 5)				9.1	5.1	150	29.8017	Ambiguous		34.103	34.103	33.881	MT	D.C.	5019
CL12005Contig1	Q2LK77_XENLA	SAMP_HUMAN	Serum amyloid P-component (SAP) (9.5S alpha-1-glycoprotein) [Cleaved into: Serum amyloid P-component(1-203)]				39	5	2.8	0.556748	Ambiguous		119.31	64.338	25.387	ER	D.C.	933
CL2524Contig2	B3DLL4_XENLA	PACS2_HUMAN	Phosphofurin acidic cluster sorting protein 2 (PACS-2) (PACS1-like protein)	-0.44	2	0.7	30	5	2.1	0.428189	Ambiguous		97.725	97.786	97.702		D.C.	3620
CL1Contig1143	K9J7R1_XENTR	DEPD5_HUMAN	DEP domain-containing protein 5	-3	0.3	0	1.7	4.9	0.12	0.0250879	Ambiguous		180.66		181.264		D.C.	2663
CL3319Contig2	Q5XGI8_XENTR	PAR3L_HUMAN	Partitioning defective 3 homolog B (Amyotrophic lateral sclerosis 2 chromosomal region candidate gene 19 protein) (PAR3-beta) (Partitioning defective 3-like protein) (PAR3-L protein)	-3	1.4	0	39	4.8	2.8	0.576049	Ambiguous		104.24	117.402	132.494		D.C.	4505
dsrrswapns_comp214959_c2_seq2	Q7ZXQ2_XENLA	FUS_HUMAN	RNA-binding protein FUS (75 kDa DNA-pairing protein) (Oncogene FUS) (Oncogene TLS) (POMp75) (Translocated in liposarcoma protein)	1.68	27	1300	22	4.7	46	9.72241	Ambiguous		54.704	54.971	53.426		D.C.	9570
zeinaSSns_comp388343_c0_seq1	F6SGQ1_XENTR	GPTC8_HUMAN	G patch domain-containing protein 8	3	0	87	1.6	4.6	0.12	0.0250879	Ambiguous		159.74		164.197		D.C.	11170
CL3112Contig2	PELP1_XENLA	PELP1_HUMAN	Proline-, glutamic acid- and leucine-rich protein 1 (Modulator of non-genomic activity of estrogen receptor) (Transcription factor HMX3)	1.94	5.7	490	1.5	4.5	0.42	0.092259	Ambiguous		113.99	110.459	119.7		D.C.	4324
dsrrswapns_comp208161_c0_seq6	CPT2_XENLA	CPT2_HUMAN	Carnitine O-palmitoyltransferase 2, mitochondrial (EC 2.3.1.21) (Carnitine palmitoyltransferase II) (CPT II)				0.94	4.4	1.3	0.291732	Ambiguous		64.653	74.557	73.777	MT	D.C.	5305
dsrrswapns_comp216493_c4_seq19	F7C1V5_XENTR	PRD15_HUMAN	PR domain zinc finger protein 15 (EC 2.1.1.-) (PR domain-containing protein 15) (Zinc finger protein 298)	3	0	3.5	1.6	4.4	0.11	0.0250879	Ambiguous		112.76	155.805	169.269		D.C.	8756
zeinaSSns_comp389217_c1_seq1	Q6GP79_XENLA	EXOC5_HUMAN	Exocyst complex component 5 (Exocyst complex component Sec10) (hSec10)	-3	1.1	0	12	4.3	0.86	0.199286	Ambiguous		81.725	81.841	81.853		D.C.	11256
CL3019Contig2	Q6DEA0_XENLA	PCF11_HUMAN	Pre-mRNA cleavage complex 2 protein Pcf11 (Pre-mRNA cleavage complex II protein Pcf11)	3	0	62	1.5	4.3	0.11	0.0250879	Ambiguous		190.43	9.664	173.05		D.C.	4224
CL2833Contig3	PHF10_XENLA	PHF10_HUMAN	PHD finger protein 10 (BRG1-associated factor 45a) (BAF45a) (XAP135)	2.17	0.7	110	6.6	4.2	0.47	0.112232	Ambiguous		59.436	57.328	56.051		D.C.	4027
CL3143Contig5	B1WBA1_XENLA	MA7D1_HUMAN	MAP7 domain-containing protein 1 (Arginine/proline-rich coiled-coil domain-containing protein 1) (Proline/arginine-rich coiled-coil domain-containing protein 1)	-3	13	0	9.4	4.1	0.67	0.166154	Ambiguous		105.27	46.748	92.82		D.C.	4353
CL8774Contig1	EXOC8_XENLA	EXOC8_HUMAN	Exocyst complex component 8 (Exocyst complex 84 kDa subunit)	-3	4	0	25	3.9	1.8	0.460544	Ambiguous		78.773	78.774	81.799		D.C.	8284
CL234Contig8	F7ETR2_XENTR	DHX36_HUMAN	ATP-dependent RNA helicase DHX36 (EC 3.6.4.12) (EC 3.6.4.13) (DEAH box protein 36) (G4-resolvase 1) (G4R1) (MLE-like protein 1) (RNA helicase associated with AU-rich element ARE)	0.85	3.9	28	16	3.9	1.1	0.286418	Ambiguous		112.12	153.318	114.76		D.C.	3395
dsrrswapns_comp216475_c3_seq6	S421B_XENLA	SV421_HUMAN	Histone-lysine N-methyltransferase SUV420H1 (EC 2.1.1.43) (Lysine N-methyltransferase 5B) (Suppressor of variegation 4-20 homolog 1) (Su(var)4-20 homolog 1) (Suv4-20h1)	-3	6.3	0	30	3.8	2.1	0.569031	Ambiguous		205.62	89.547	99.187		D.C.	4359
CL7177Contig2	F6RDP8_XENTR	PCNT_HUMAN	Pericentrin (Kendrin) (Pericentrin-B)				1.3	3.6	0.091	0.0250879	Ambiguous	NESdbO	295.66		378.037		D.C.	7540
CL11799Contig1	Q6DDF2_XENLA	ACAD9_HUMAN	Acyl-CoA dehydrogenase family member 9, mitochondrial (ACAD-9) (EC 1.3.99.-)				34	3.2	43	13.7604	Ambiguous		68.547	493.008	68.76	MT	D.C.	844
dsrrswapns_comp203971_c0_seq2	F6UXX7_XENTR	DIAP1_HUMAN	Protein diaphanous homolog 1 (Diaphanous-related formin-1) (DRF1)	-3	14	0	41	3.2	3	0.937815	Ambiguous		66.65	114.21	141.347		D.C.	9102
CL5202Contig4	Q7ZWQ4_XENLA	MYO1E_HUMAN	Unconventional myosin-Ie (Myosin-Ic) (Unconventional myosin 1E)	-3	12	0	23	3.2	1.6	0.502318	Ambiguous		125.65	125.651	127.062		D.C.	6265
CL2226Contig1	Q6GPL2_XENLA	ZHX3_HUMAN	Zinc fingers and homeoboxes protein 3 (Triple homeobox protein 1) (Zinc finger and homeodomain protein 3)	2.2	0.6	95	20	3.2	1.4	0.456086	Ambiguous		103.59	103.595	104.658		D.C.	3227
CL6442Contig2	A4QNB2_XENTR	RM46_HUMAN	39S ribosomal protein L46, mitochondrial (L46mt) (MRP-L46) (P2ECSL)				11	3.1	33	10.5939	Ambiguous		34.296		31.705	MT	D.C.	7111
CL6343Contig1	Q6XV80_XENLA	NBN_HUMAN	Nibrin (Cell cycle regulatory protein p95) (Nijmegen breakage syndrome protein 1)	2.58	0.8	290	37	3.1	2.6	0.847262	Ambiguous	NESdbO	84.633	84.614	84.959		D.C.	7044
CL5925Contig2	Q66JA0_XENLA	STRN_HUMAN	Striatin	-3	5.8	0	5.5	3	10	3.47984	Ambiguous		86.918	87.098	86.132		D.C.	6789
CL6351Contig1	F6S1E5_XENTR	URB2_HUMAN	Unhealthy ribosome biogenesis protein 2 homolog	3	0	16	1.1	3	0.076	0.0250879	Ambiguous		178.69		170.544		D.C.	7050
CL6653Contig2	B1WB67_XENTR	EVI5L_HUMAN	EVI5-like protein (Ecotropic viral integration site 5-like protein)	-3	0.1	0	6.8	2.9	0.49	0.167869	Ambiguous		86.306	120.49	91.376		D.C.	7241
CL6290Contig1	DDB1_XENLA	DDB1_HUMAN	DNA damage-binding protein 1 (DDB p127 subunit) (DNA damage-binding protein a) (DDBa) (Damage-specific DNA-binding protein 1) (HBV X-associated protein 1) (XAP-1) (UV-damaged DNA-binding factor) (UV-damaged DNA-binding protein 1) (UV-DDB 1) (XPE-binding factor) (XPE-BF) (Xeroderma pigmentosum group E-complementing protein) (XPCe)	0.47	180	520	270	2.8	480	172.268	Ambiguous		126.83	126.833	126.968		D.C.	7002
CL10351Contig1	ELP1_XENLA	ELP1_HUMAN	Elongator complex protein 1 (ELP1) (IkappaB kinase complex-associated protein) (IKK complex-associated protein) (p150)	-3	52	0	470	2.8	34	12.157	Ambiguous		132.65	132.911	150.254		D.C.	324
TC463468	A2BD87_XENLA			0.879884	65	490	320	2.8	23	8.12311	Ambiguous		11.582	105.873			D.C.	10777
CL174Contig6	Q7ZXW5_XENLA	RPC1_HUMAN	DNA-directed RNA polymerase III subunit RPC1 (RNA polymerase III subunit C1) (EC 2.7.7.6) (DNA-directed RNA polymerase III largest subunit) (DNA-directed RNA polymerase III subunit A) (RNA polymerase III 155 kDa subunit) (RPC155) (RNA polymerase III subunit C160)	2.74	0.8	420	290	2.8	21	7.51262	Ambiguous		155.74	55.822	155.641		D.C.	2203
zeinaSSns_comp386566_c0_seq7	F7EP07_XENTR	PTBP3_HUMAN	Polypyrimidine tract-binding protein 3 (Regulator of differentiation 1) (Rod1)	-3	4.2	0	210	2.8	15	5.4047	Ambiguous		56.551	59.243	59.69		D.C.	11057
CL10155Contig1	F6ZDW4_XENTR	DDX20_HUMAN	Probable ATP-dependent RNA helicase DDX20 (EC 3.6.4.13) (Component of gems 3) (DEAD box protein 20) (DEAD box protein DP 103) (Gemin-3)	-2.45	59	0.2	210	2.8	15	5.3464	Ambiguous	Thakar	85.835	36.058	92.241		D.C.	243
CL113Contig10	Q7ZY22_XENLA	SMRC1_HUMAN	SWI/SNF complex subunit SMARCC1 (BRG1-associated factor 155) (BAF155) (SWI/SNF complex 155 kDa subunit) (SWI/SNF-related matrix-associated actin-dependent regulator of chromatin subfamily C member 1)	2.42	1.4	380	200	2.8	14	5.17335	Ambiguous		136.28	134.373	122.867		D.C.	692
CL10045Contig1	F6ZFB1_XENTR	GEMI4_HUMAN	Gem-associated protein 4 (Gemin-4) (Component of gems 4) (p97)	-3	71	0	130	2.8	9.1	3.30159	Ambiguous	Thakar	120.99	34.194	120.037		D.C.	196
CL2821Contig3	Q7ZY98_XENLA	SND1_HUMAN	Staphylococcal nuclease domain-containing protein 1 (100 kDa coactivator) (EBNA2 coactivator p100) (Tudor domain-containing protein 11) (p100 co-activator)	-1.26	600	33	420	2.7	230	84.6593	Ambiguous		105.93	101.281	101.997		D.C.	4008
CL2676Contig2	NXN_XENLA	NXN_HUMAN	Nucleoredoxin (EC 1.8.1.8)	-1.43	22	0.8	120	2.7	8.8	3.27064	Ambiguous		46.785	46.844	48.392		D.C.	3843
CL8987Contig1	ANM9_XENLA	ANM9_HUMAN	Putative protein arginine N-methyltransferase 9 (Putative protein arginine N-methyltransferase 10) (EC 2.1.1.-)	0.89	2.1	17	19	2.7	1.4	0.49197	Ambiguous		92.177	92.178	94.501		D.C.	8375
CL3980Contig2	Q4V866_XENLA	CLPX_HUMAN	ATP-dependent Clp protease ATP-binding subunit clpX-like, mitochondrial				13	2.7	0.93	0.342441	Ambiguous		69.026	68.848	69.224	MT	D.C.	5220
zeinaSSns_comp388453_c2_seq1	Q7ZXP8_XENLA	EF2_HUMAN	Elongation factor 2 (EF-2)	-1.88	5300	71	280	2.6	4400	1724.42	Ambiguous	BioGrid	97.741	95.427	95.338		D.C.	11181
CL5437Contig1	F7BBG0_XENTR	INADL_HUMAN	InaD-like protein (Inadl protein) (hINADL) (Pals1-associated tight junction protein) (Protein associated to tight junctions)	-0.55	12	3.3	82	2.6	5.9	2.24913	Ambiguous		203.33	277.697	196.368		D.C.	6444
CL3187Contig1	F6RVU2_XENTR	IQGA3_HUMAN	Ras GTPase-activating-like protein IQGAP3	-1.15	8.3	0.6	60	2.6	4.3	1.6341	Ambiguous		188.61	188.778	184.699		D.C.	4392
CL6632Contig2	Q6GPM6_XENLA	WRN_HUMAN	Werner syndrome ATP-dependent helicase (EC 3.6.4.12) (DNA helicase, RecQ-like type 3) (RecQ3) (Exonuclease WRN) (EC 3.1.-.-) (RecQ protein-like 2)	2.97	0.3	310	5.1	2.6	0.36	0.140099	Ambiguous		161.05	161.132	162.461		D.C.	7222
CL2858Contig3	Q7ZWZ3_XENLA	ABCE1_HUMAN	ATP-binding cassette sub-family E member 1 (2'-5'-oligoadenylate-binding protein) (HuHP68) (RNase L inhibitor) (Ribonuclease 4 inhibitor) (RNS4I)	-1.16	510	35	270	2.5	160	63.5877	Ambiguous		67.535	67.536	67.314		D.C.	4052
CL891Contig1	Q8AVG6_XENLA	DNJA1_HUMAN	DnaJ homolog subfamily A member 1 (DnaJ protein homolog 2) (HSDJ) (Heat shock 40 kDa protein 4) (Heat shock protein J2) (HSJ-2) (Human DnaJ protein 2) (hDj-2)	-0.03	180	170	140	2.5	110	42.1881	Ambiguous		45.071	45.071	44.868		D.C.	8348
CL6712Contig2	GEMI2_XENLA	GEMI2_HUMAN	Gem-associated protein 2 (Gemin-2) (Component of gems 2) (Survival of motor neuron protein-interacting protein 1) (SMN-interacting protein 1)	-1.72	190	3.7	450	2.5	32	12.955	Ambiguous		30.383	29.525	31.585		D.C.	7278
CL2687Contig3	PP1GB_XENLA	PP1G_HUMAN	Serine/threonine-protein phosphatase PP1-gamma catalytic subunit (PP-1G) (EC 3.1.3.16) (Protein phosphatase 1C catalytic subunit)	-0.07	17	15	430	2.5	31	12.6439	Ambiguous		36.937	36.938	36.984		D.C.	3854
dsrrswapns_comp214988_c5_seq4	C4N9Q9_XENLA	RAD50_HUMAN	DNA repair protein RAD50 (hRAD50) (EC 3.6.-.-)	3	0.5	520	150	2.5	18	7.24522	Ambiguous		153.91	153.696	153.892		D.C.	9571
CL18008Contig1	Q5BIY6_XENLA	RPC7_HUMAN	DNA-directed RNA polymerase III subunit RPC7 (RNA polymerase III subunit C7) (DNA-directed RNA polymerase III subunit G) (RNA polymerase III 32 kDa subunit) (RPC32)	2.13	3.2	430	210	2.5	15	5.91885	Ambiguous		24.876	24.877	25.914		D.C.	2287
CL36Contig13	Q08B25_XENLA	RBM25_HUMAN	RNA-binding protein 25 (Arg/Glu/Asp-rich protein of 120 kDa) (RED120) (Protein S164) (RNA-binding motif protein 25) (RNA-binding region-containing protein 7)	3	0.5	550	150	2.5	11	4.23251	Ambiguous		96.053	95.979	100.185		D.C.	4917
CL4054Contig1	Q05AU0_XENLA	TAF9_HUMAN	Transcription initiation factor TFIID subunit 9 (RNA polymerase II TBP-associated factor subunit G) (STAF31/32) (Transcription initiation factor TFIID 31 kDa subunit) (TAFII-31) (TAFII31) (Transcription initiation factor TFIID 32 kDa subunit) (TAFII-32) (TAFII32)	2.42	1.5	400	52	2.5	3.7	1.46807	Ambiguous		27.532	27.992	28.974		D.C.	5307
CL9598Contig1	F7C9M5_XENTR	RFC1_HUMAN	Replication factor C subunit 1 (Activator 1 140 kDa subunit) (A1 140 kDa subunit) (Activator 1 large subunit) (Activator 1 subunit 1) (DNA-binding protein PO-GA) (Replication factor C 140 kDa subunit) (RF-C 140 kDa subunit) (RFC140) (Replication factor C large subunit)	2.24	3.1	550	26	2.5	1.8	0.735057	Ambiguous		127.96	113.222	128.255		D.C.	8652
CL4918Contig2	Q6GM89_XENLA	TRIM2_HUMAN	Tripartite motif-containing protein 2 (EC 6.3.2.-) (E3 ubiquitin-protein ligase TRIM2) (RING finger protein 86)	-1.19	29	1.8	5.8	2.5	0.42	0.164199	Ambiguous		81.063	81.064	81.53		D.C.	6025
CL13466Contig1	A6H8I7_XENLA	MED17_HUMAN	Mediator of RNA polymerase II transcription subunit 17 (Activator-recruited cofactor 77 kDa component) (ARC77) (Cofactor required for Sp1 transcriptional activation subunit 6) (CRSP complex subunit 6) (Mediator complex subunit 17) (Thyroid hormone receptor-associated protein complex 80 kDa component) (Trap80) (Transcriptional coactivator CRSP77) (Vitamin D3 receptor-interacting protein complex 80…	2.84	0.2	140	3.5	2.5	0.25	0.100005	Ambiguous		72.315	72.315	72.89		D.C.	1361
CL11508Contig1	F6W1M8_XENTR	SMHD1_HUMAN	Structural maintenance of chromosomes flexible hinge domain-containing protein 1 (SMC hinge domain-containing protein 1)	1.89	4.1	320	24	2.4	1.7	0.706567	Ambiguous		223.75	343.854	226.374		D.C.	741
TC453026	H2B11_XENLA	H2B1J_HUMAN	Histone H2B type 1-J (Histone H2B.1) (Histone H2B.r) (H2B/r)	1.69	86	4200	120	2.3	680	295.208	Ambiguous		13.934	13.934	13.904		D.C.	10697
CL3325Contig5	CW15A_XENLA	CWC15_HUMAN	Spliceosome-associated protein CWC15 homolog	2.8	0.4	240	360	2.3	26	10.9802	Ambiguous		26.412	26.338	26.624		D.C.	4513
CL3824Contig1	F7CD46_XENTR	GEMI5_HUMAN	Gem-associated protein 5 (Gemin5)	-1.39	140	5.6	320	2.3	23	10.0823	Ambiguous		164.97		168.589		D.C.	5037
dsrrswapns_comp215684_c0_seq3	Q5XHF7_XENLA	CCDC9_HUMAN	Coiled-coil domain-containing protein 9	-0.22	28	17	95	2.3	6.8	2.91073	Ambiguous		68.589	68.16	59.703		D.C.	9643
dsrrswapns_comp215894_c1_seq3	Q6DE25_XENLA	CD11B_HUMAN	Cyclin-dependent kinase 11B (EC 2.7.11.22) (Cell division cycle 2-like protein kinase 1) (CLK-1) (Cell division protein kinase 11B) (Galactosyltransferase-associated protein kinase p58/GTA) (PITSLRE serine/threonine-protein kinase CDC2L1) (p58 CLK-1)	2.94	0.3	230	51	2.3	3.6	1.58773	Ambiguous		95.902	91.946	92.707		D.C.	8738
CL6569Contig1	F6YFT7_XENTR	MRCKA_HUMAN	Serine/threonine-protein kinase MRCK alpha (EC 2.7.11.1) (CDC42-binding protein kinase alpha) (DMPK-like alpha) (Myotonic dystrophy kinase-related CDC42-binding kinase alpha) (MRCK alpha) (Myotonic dystrophy protein kinase-like alpha)	-3	2.9	0	47	2.3	3.3	1.45131	Ambiguous		181.8	83.372	197.307		D.C.	7195
dsrrswapns_comp215184_c0_seq2	Q6GMZ7_XENLA	KIFA3_HUMAN	Kinesin-associated protein 3 (KAP-3) (KAP3) (Smg GDS-associated protein)	-3	14	0	21	2.3	1.5	0.638163	Ambiguous		91.674	91.776	91.205		D.C.	9593
CL1461Contig5	Q08B56_XENLA	EXOC7_HUMAN	Exocyst complex component 7 (Exocyst complex component Exo70)	-3	3.9	0	17	2.3	1.2	0.518228	Ambiguous		78.841	78.842	83.382		D.C.	1641
CL5575Contig1	F6Y4L0_XENTR	RNF17_HUMAN	RING finger protein 17 (Tudor domain-containing protein 4)	-0.8	3	0.5	51	2.2	3.6	1.65663	Ambiguous		177.48	216.262	184.643		D.C.	6541
CL6315Contig1	Q7ZYT2_XENLA	NMT1_HUMAN	Glycylpeptide N-tetradecanoyltransferase 1 (EC 2.3.1.97) (Myristoyl-CoA:protein N-myristoyltransferase 1) (NMT 1) (Type I N-myristoyltransferase) (Peptide N-myristoyltransferase 1)	-3	310	0	460	2.1	33	15.6353	Ambiguous		55.322	55.194	56.806		D.C.	7023
TC437288	Q6AZT1_XENLA	SRSF7_HUMAN	Serine/arginine-rich splicing factor 7 (Splicing factor 9G8) (Splicing factor, arginine/serine-rich 7)	3	0	510	420	2.1	30	14.6417	Ambiguous		14.394	26.946	27.367		D.C.	1977
dsrrswapns_comp211891_c0_seq2	Q6PHW7_XENLA	ELOC_HUMAN	Transcription elongation factor B polypeptide 1 (Elongin 15 kDa subunit) (Elongin-C) (EloC) (RNA polymerase II transcription factor SIII subunit C) (SIII p15)	0.32	310	650	140	2.1	10	4.81287	Ambiguous		12.473	12.473	12.473		D.C.	9351
CL2517Contig3	Q6DFI0_XENLA	K0020_HUMAN	Pumilio domain-containing protein KIAA0020 (HBV X-transactivated gene 5 protein) (HBV XAg-transactivated protein 5) (Minor histocompatibility antigen HA-8) (HLA-HA8)	1.27	10	190	87	2.1	6.2	2.9414	Ambiguous		72.76	72.735	73.584		D.C.	3606
dsrrswapns_comp204745_c2_seq2	Q32NI4_XENLA	LMBL3_HUMAN	Lethal(3)malignant brain tumor-like protein 3 (H-l(3)mbt-like protein 3) (L(3)mbt-like protein 3) (MBT-1)	3	0	66	22	2.1	1.6	0.766921	Ambiguous		87.506	75.541	88.337		D.C.	9111
CL2520Contig2	I6N3H5_XENLA	RIF1_HUMAN	Telomere-associated protein RIF1 (Rap1-interacting factor 1 homolog)	2.14	1.8	240	18	2.1	1.3	0.602053	Ambiguous		254.23	257.372	274.466		D.C.	3614
zeinaSSns_comp386351_c0_seq1	EIF2A_XENLA	EIF2A_HUMAN	Eukaryotic translation initiation factor 2A (eIF-2A) (65 kDa eukaryotic translation initiation factor 2A) [Cleaved into: Eukaryotic translation initiation factor 2A, N-terminally processed]	-2.15	550	3.9	740	2	53	26.7462	Ambiguous		65.27	64.817	64.99		D.C.	11044
CL28Contig6	Q6GQZ2_XENLA	SRSF4_HUMAN	Serine/arginine-rich splicing factor 4 (Pre-mRNA-splicing factor SRP75) (SRP001LB) (Splicing factor, arginine/serine-rich 4)	3	0	390	320	2	23	11.6297	Ambiguous		31.432	29.285	56.678		D.C.	4095
CL3947Contig4	Q5HZ98_XENLA	WASF2_HUMAN	Wiskott-Aldrich syndrome protein family member 2 (WASP family protein member 2) (Protein WAVE-2) (Verprolin homology domain-containing protein 2)	-3	35	0	190	2	14	6.97529	Ambiguous		53.279	53.397	54.284		D.C.	5176
CL4207Contig2	Q6DDN1_XENLA	RAB3I_HUMAN	Rab-3A-interacting protein (Rab3A-interacting protein) (Rabin-3) (SSX2-interacting protein)	-0.74	17	3.1	170	2	12	6.00959	Ambiguous		50.661	50.661	53.021		D.C.	5462
CL4204Contig3	Q2KHS3_XENLA	OSB11_HUMAN	Oxysterol-binding protein-related protein 11 (ORP-11) (OSBP-related protein 11)	-3	21	0	66	2	4.7	2.34366	Ambiguous		82.253	82.254	83.643		D.C.	5457
CL4591Contig2	Q6NU42_XENLA	TPC12_HUMAN	Trafficking protein particle complex subunit 12 (Tetratricopeptide repeat protein 15) (TPR repeat protein 15) (TTC-15)	-2.25	76	0.4	160	1.9	11	6.07484	Ambiguous		86.835	86.808	79.375		D.C.	5768
CL10213Contig1	Q98TI1_XENLA	KIF3A_HUMAN	Kinesin-like protein KIF3A (Microtubule plus end-directed kinesin motor 3A)	-3	34	0	140	1.9	9.8	5.27833	Ambiguous		79.721	70.644	80.041		D.C.	265
CL8003Contig1	Q7ZTK8_XENLA	CD2B2_HUMAN	CD2 antigen cytoplasmic tail-binding protein 2 (CD2 cytoplasmic domain-binding protein 2) (CD2 tail-binding protein 2) (U5 snRNP 52K protein) (U5-52K)	3	0	190	63	1.9	4.5	2.37039	Ambiguous		45.761	45.763	37.646		D.C.	7956
CL1Contig1214	Q6GMC1_XENLA	RS27A_HUMAN	Ubiquitin-40S ribosomal protein S27a (Ubiquitin carboxyl extension protein 80) [Cleaved into: Ubiquitin; 40S ribosomal protein S27a]	0.01	7500	7800	6.1	1.8	7400	4146.57	Ambiguous		17.965	17.965	17.965		D.C.	2681
CL1Contig1209	DDX1_XENLA	DDX1_HUMAN	ATP-dependent RNA helicase DDX1 (EC 3.6.4.13) (DEAD box protein 1) (DEAD box protein retinoblastoma) (DBP-RB)	0.16	380	550	290	1.8	400	225.066	Ambiguous	BioGrid	82.346	82.347	82.432		D.C.	2679
CL5621Contig1	NCDN_XENLA	NCDN_HUMAN	Neurochondrin	-2.52	63	0.2	700	1.8	50	27.3871	Ambiguous	Thakar	80.377	79.957	78.864		D.C.	6565
CL8607Contig1	Q68EU4_XENLA	DCTN4_HUMAN	Dynactin subunit 4 (Dyn4) (Dynactin subunit p62)	-3	85	0	610	1.8	44	24.0419	Ambiguous		52.719	52.72	52.337		D.C.	8219
CL1697Contig2	ANX2A_XENLA	ANXA2_HUMAN	Annexin A2 (Annexin II) (Annexin-2) (Calpactin I heavy chain) (Calpactin-1 heavy chain) (Chromobindin-8) (Lipocortin II) (Placental anticoagulant protein IV) (PAP-IV) (Protein I) (p36)	-1.6	33	0.8	270	1.8	19	10.8538	Ambiguous		44.437	38.545	38.604		D.C.	2100
TC418750	Q08B75_XENLA	RCC1_HUMAN	Regulator of chromosome condensation (Cell cycle regulatory protein) (Chromosome condensation protein 1)	2.47	0.7	190	200	1.8	15	8.22802	Ambiguous	BioGrid	44.667	44.667	44.969		D.C.	10419
CL10278Contig1	Q58E93_XENLA	EXOS3_HUMAN	Exosome complex component RRP40 (Exosome component 3) (Ribosomal RNA-processing protein 40) (p10)	1.2	14	220	120	1.8	8.6	4.8714	Ambiguous		27.241	18.635	29.572		D.C.	285
CL7742Contig1	Q5HZM9_XENLA	DPTOR_HUMAN	DEP domain-containing mTOR-interacting protein (DEP domain-containing protein 6)	-0.27	26	14	89	1.8	6.4	3.46269	Ambiguous		46.173	45.854	46.294		D.C.	7812
CL4644Contig1	TF2B_XENLA	TF2B_HUMAN	Transcription initiation factor IIB (General transcription factor TFIIB) (S300-II)	2.06	3.2	370	48	1.8	3.4	1.87116	Ambiguous		39.229	34.678	34.833		D.C.	5819
CL3751Contig1	A0JMW2_XENLA	HEAT2_HUMAN	Dynein assembly factor 5, axonemal (HEAT repeat-containing protein 2)	0.52	25	83	46	1.8	3.3	1.86918	Ambiguous		96.947	95.182	93.521		D.C.	4976
CL2633Contig2	Q6DJL9_XENLA	LUC7L_HUMAN	Putative RNA-binding protein Luc7-like 1 (Putative SR protein LUC7B1) (SR+89)	3	0	110	41	1.8	2.9	1.61951	Ambiguous		38.405	38.274	43.728		D.C.	3793
CL564Contig2	Q5BJ40_XENLA	MBB1A_HUMAN	Myb-binding protein 1A	1.57	5.4	200	26	1.8	1.9	1.06738	Ambiguous		146.32	108.099	148.855		D.C.	6580
CL267Contig8	Q7ZYP5_XENLA	CIR1A_HUMAN	Cirhin	1.47	2.5	73	7.2	1.8	0.52	0.293604	Ambiguous		77.129	77.13	76.89		D.C.	3846
CL2752Contig3	CHFR_XENLA	CHFR_HUMAN	E3 ubiquitin-protein ligase CHFR (EC 6.3.2.-) (Checkpoint with forkhead and RING finger domains protein) (RING finger protein 196)	3	0	110	2.6	1.8	0.19	0.1059	Ambiguous		70.018	70.019	73.386		D.C.	3932
CL3255Contig2	Q52KT0_XENLA	PEPL1_HUMAN	Probable aminopeptidase NPEPL1 (EC 3.4.11.-) (Aminopeptidase-like 1)	0.41	300	770	4600	1.7	250	144.399	Ambiguous		57.911	55.815	55.861		D.C.	4445
CL2959Contig1	I4E3A_XENLA	IF4E3_HUMAN	Eukaryotic translation initiation factor 4E type 3 (eIF-4E type 3) (eIF-4E3) (eIF4E type 3) (eIF4E-3)	-0.3	370	180	3000	1.7	220	130.377	Ambiguous		26.33	24.814	24.441		D.C.	4154
CL591Contig6	Q7ZYM0_XENLA	KLC4_HUMAN	Kinesin light chain 4 (KLC 4) (Kinesin-like protein 8)	-3	91	0	500	1.7	36	20.4585	Ambiguous		71.31	73.397	68.64		D.C.	6784
CL9916Contig1	Q6GQ59_XENLA	RFC5_HUMAN	Replication factor C subunit 5 (Activator 1 36 kDa subunit) (A1 36 kDa subunit) (Activator 1 subunit 5) (Replication factor C 36 kDa subunit) (RF-C 36 kDa subunit) (RFC36)	1.84	18	1200	270	1.7	32	18.7395	Ambiguous		37.915	37.93	38.497		D.C.	8801
CL18110Contig1	CWC27_XENLA	CWC27_HUMAN	Peptidyl-prolyl cis-trans isomerase CWC27 homolog (PPIase CWC27) (EC 5.2.1.8) (Antigen NY-CO-10) (Serologically defined colon cancer antigen 10)	2.14	3.3	450	380	1.7	27	15.9033	Ambiguous		54.874	54.875	53.847		D.C.	2301
CL8638Contig1	Q6P325_XENTR	RPC6_HUMAN	DNA-directed RNA polymerase III subunit RPC6 (RNA polymerase III subunit C6) (DNA-directed RNA polymerase III subunit F) (RNA polymerase III 39 kDa subunit) (RPC39)	2.77	1.1	640	250	1.7	18	10.7905	Ambiguous		35.312		35.684		D.C.	8229
dsrrswapns_comp215779_c7_seq3	Q68FI8_XENLA	BRAF_HUMAN	Serine/threonine-protein kinase B-raf (EC 2.7.11.1) (Proto-oncogene B-Raf) (p94) (v-Raf murine sarcoma viral oncogene homolog B1)	-3	39	0	170	1.7	12	7.36186	Ambiguous		92.94	89.111	84.437		D.C.	9652
CL1559Contig2	Q5M779_XENLA	RM11_HUMAN	39S ribosomal protein L11, mitochondrial (L11mt) (MRP-L11)				160	1.7	11	6.66392	Ambiguous		20.67	20.642	20.683	MT	D.C.	1875
CL7448Contig1	Q642Q2_XENLA	DP13B_HUMAN	DCC-interacting protein 13-beta (Dip13-beta) (Adapter protein containing PH domain, PTB domain and leucine zipper motif 2)	-3	17	0	120	1.7	8.4	4.93064	Ambiguous		74.14	74.141	74.493		D.C.	7659
CL9908Contig1	Q7ZXM7_XENLA	PCMD2_HUMAN	Protein-L-isoaspartate O-methyltransferase domain-containing protein 2	1.08	10	120	110	1.7	8	4.76242	Ambiguous		41.329	41.329	41.072		D.C.	8795
CL8719Contig2	TIPRL_XENLA	TIPRL_HUMAN	TIP41-like protein (Putative MAPK-activating protein PM10) (Type 2A-interacting protein) (TIP)	-0.23	110	65	100	1.7	7.1	4.27542	Ambiguous		29.981	29.981	31.444		D.C.	8262
TC448111	F6RQK0_XENTR	GEMI7_HUMAN	Gem-associated protein 7 (Gemin-7) (SIP3)	-0.57	130	35	94	1.7	6.7	3.85245	Ambiguous		15.003		14.537		D.C.	10655
CL9740Contig1	B3DL92_XENTR	PPIL4_HUMAN	Peptidyl-prolyl cis-trans isomerase-like 4 (PPIase) (EC 5.2.1.8) (Cyclophilin-like protein PPIL4) (Rotamase PPIL4)	3	0	310	76	1.7	5.4	3.26023	Ambiguous		54.963	18.279	57.225		D.C.	8715
zeinaSSns_comp388506_c0_seq1	VPS51_XENLA	VPS51_HUMAN	Vacuolar protein sorting-associated protein 51 homolog (Another new gene 2 protein) (Protein fat-free homolog)	-3	14	0	26	1.7	1.9	1.1007	Ambiguous		83.783	84.787	86.042		D.C.	11185
CL1Contig876		SPAG5_HUMAN	Sperm-associated antigen 5 (Astrin) (Deepest) (Mitotic spindle-associated protein p126) (MAP126)	-2.34	15	0.1	27	1.7	1.9	1.09791	Ambiguous		169.28		134.422		D.C.	2882
CL930Contig1	B5DE49_XENLA	WDR26_HUMAN	WD repeat-containing protein 26 (CUL4- and DDB1-associated WDR protein 2) (Myocardial ischemic preconditioning up-regulated protein 2)	0.81	6	39	21	1.7	1.5	0.879939	Ambiguous		67.753	76.864	72.124		D.C.	8539
CL1857Contig2	ARMC8_XENLA	ARMC8_HUMAN	Armadillo repeat-containing protein 8	0.67	8.7	41	11	1.7	0.81	0.481256	Ambiguous		79.445	80.4	75.509		D.C.	2385
CL5146Contig1	Q6P7J4_XENLA	SNX5_HUMAN	Sorting nexin-5	-2.64	200	0.5	2800	1.6	200	120.294	Ambiguous		46.029	46.03	46.816		D.C.	6221
CL13107Contig1	HSDL2_XENLA	HSDL2_HUMAN	Hydroxysteroid dehydrogenase-like protein 2 (EC 1.-.-.-)	0.07	13	15	1800	1.6	130	79.3454	Ambiguous		44.559	44.56	45.395		D.C.	1256
CL3922Contig1	B7ZSK0_XENLA	SMC4_HUMAN	Structural maintenance of chromosomes protein 4 (SMC protein 4) (SMC-4) (Chromosome-associated polypeptide C) (hCAP-C) (XCAP-C homolog)	0.33	110	250	460	1.6	33	20.3063	Ambiguous		147.05	147.047	147.182		D.C.	5146
CL1717Contig2	Q7ZWL4_XENLA	DNJA2_HUMAN	DnaJ homolog subfamily A member 2 (Cell cycle progression restoration gene 3 protein) (Dnj3) (Dj3) (HIRA-interacting protein 4) (Renal carcinoma antigen NY-REN-14)	0.07	140	160	3.7	1.6	32	20.436	Ambiguous		45.474	45.474	45.746		D.C.	2141
CL10754Contig1	ACBD6_XENLA	ACBD6_HUMAN	Acyl-CoA-binding domain-containing protein 6	-0.17	10	6.9	280	1.6	20	12.1513	Ambiguous		32.082	77.227	31.151		D.C.	462
CL6545Contig1	HEAT6_XENLA	HEAT6_HUMAN	HEAT repeat-containing protein 6 (Amplified in breast cancer protein 1)	-2.67	30	0.1	100	1.6	7.4	4.47457	Ambiguous		130.18	130.049	128.781		D.C.	7178
CL14892Contig1	Q66KV1_XENLA	TPGS2_HUMAN	Tubulin polyglutamylase complex subunit 2 (PGs2)	-0.18	5.3	3.4	98	1.6	7	4.25114	Ambiguous		31.204	31.204	33.318		D.C.	1702
CL6897Contig1	SAS6_XENLA	SAS6_HUMAN	Spindle assembly abnormal protein 6 homolog (HsSAS-6)	-1.29	23	1.2	53	1.6	3.8	2.38868	Ambiguous		75.129	75.13	74.397		D.C.	7373
CL8522Contig2	B1H3J1_XENTR	EXOC1_HUMAN	Exocyst complex component 1 (Exocyst complex component Sec3)	-3	4.9	0	26	1.6	1.9	1.1447	Ambiguous		101.34	23.821	101.982		D.C.	8177
CL733Contig3	Q2TAR1_XENLA	SRC_HUMAN	Proto-oncogene tyrosine-protein kinase Src (EC 2.7.10.2) (Proto-oncogene c-Src) (pp60c-src) (p60-Src)	-0.69	2	0.4	10	1.6	0.73	0.452361	Ambiguous		60.183	59.913	59.835		D.C.	7613
CL367Contig6	Q6NU02_XENLA	IF4A1_HUMAN	Eukaryotic initiation factor 4A-I (eIF-4A-I) (eIF4A-I) (EC 3.6.4.13) (ATP-dependent RNA helicase eIF4A-1)	-1.99	3700	38	850	1.5	2100	1380.78	Ambiguous		46.018	46.019	46.154		D.C.	4897
CL3195Contig2	Q8AVZ5_XENLA	SMD3_HUMAN	Small nuclear ribonucleoprotein Sm D3 (Sm-D3) (snRNP core protein D3)	0.58	240	890	770	1.5	55	37.6953	Ambiguous		13.902	13.902	13.916		D.C.	4401
CL134Contig6	Q6DE18_XENLA	ARP5L_HUMAN	Actin-related protein 2/3 complex subunit 5-like protein (Arp2/3 complex 16 kDa subunit 2) (ARC16-2)	-3	120	0	550	1.5	39	25.3095	Ambiguous		17.138	17.138	16.941		D.C.	1371
CL4569Contig1	Q3B8D6_XENLA	RM23_HUMAN	39S ribosomal protein L23, mitochondrial (L23mt) (MRP-L23) (L23 mitochondrial-related protein) (Ribosomal protein L23-like)				360	1.5	26	17.6956	Ambiguous		18.203	18.204	17.781		D.C.	5749
CL115Contig7	Q8AVK9_XENLA	YBOX1_HUMAN	Nuclease-sensitive element-binding protein 1 (CCAAT-binding transcription factor I subunit A) (CBF-A) (DNA-binding protein B) (DBPB) (Enhancer factor I subunit A) (EFI-A) (Y-box transcription factor) (Y-box-binding protein 1) (YB-1)	-3	18	0	320	1.5	23	14.8464	Ambiguous		34.39	69.591	35.924		D.C.	772
CL599Contig1	Q7ZXB4_XENLA	PTBP1_HUMAN	Polypyrimidine tract-binding protein 1 (PTB) (57 kDa RNA-binding protein PPTB-1) (Heterogeneous nuclear ribonucleoprotein I) (hnRNP I)	0.91	40	320	290	1.5	21	13.3604	Ambiguous		59.242	59.243	57.221		D.C.	6826
CL13023Contig1	Q5XHI1_XENLA	RM03_HUMAN	39S ribosomal protein L3, mitochondrial (L3mt) (MRP-L3)				210	1.5	15	9.73341	Ambiguous		38.24	38.11	38.633		D.C.	1226
CL2413Contig2	Q8JJ42_XENLA	TADBP_HUMAN	TAR DNA-binding protein 43 (TDP-43)	0.58	54	200	160	1.5	11	7.66739	Ambiguous	NESdbO	44.775	44.675	44.74		D.C.	3466
CL9925Contig1	B7ZT44_XENTR	D39U1_HUMAN	Epimerase family protein SDR39U1 (EC 1.1.1.-) (Short-chain dehydrogenase/reductase family 39U member 1)	0.84	0.3	2.1	69	1.5	4.9	3.2607	Ambiguous		34.195		34.748		D.C.	8806
CL13313Contig1	F6RW87_XENTR	VPS52_HUMAN	Vacuolar protein sorting-associated protein 52 homolog (SAC2 suppressor of actin mutations 2-like protein)	-3	19	0	37	1.5	2.6	1.79028	Ambiguous		79.874		82.221		D.C.	1323
CL7921Contig1	Q5HZR7_XENLA	PHOCN_HUMAN	MOB-like protein phocein (2C4D) (Class II mMOB1) (Mob1 homolog 3) (Mob3) (Mps one binder kinase activator-like 3) (Preimplantation protein 3)	0.17	3.5	5.2	31	1.5	2.3	1.51325	Ambiguous		25.823	26.091	26.032		D.C.	7901
CL5722Contig2	Q52KN6_XENLA	EXOC4_HUMAN	Exocyst complex component 4 (Exocyst complex component Sec8)	-3	7.5	0	24	1.5	1.7	1.15778	Ambiguous		109.48	112.259	110.498		D.C.	6630
dsrrswapns_comp211462_c0_seq9	Q63ZG8_XENLA	DLGP5_HUMAN	Disks large-associated protein 5 (DAP-5) (Discs large homolog 7) (Disks large-associated protein DLG7) (Hepatoma up-regulated protein) (HURP)	-3	200	0.2	22	1.5	1.6	1.06896	Ambiguous		95.517	68.424	95.115		D.C.	9328
CL7645Contig1	TATD1_XENLA	TATD2_HUMAN	Putative deoxyribonuclease TATDN2 (EC 3.1.21.-)	3	0	8.6	9.5	1.5	0.68	0.453671	Ambiguous		78.882	33.863	85.023		D.C.	7767
CL107Contig4	Q7ZXG3_XENLA	IF5A1_HUMAN	Eukaryotic translation initiation factor 5A-1 (eIF-5A-1) (eIF-5A1) (Eukaryotic initiation factor 5A isoform 1) (eIF-5A) (Rev-binding factor) (eIF-4D)	-0.67	2500	530	13000	1.4	940	661.336	Ambiguous	BioGrid	16.704	75.692	16.832		D.C.	482
dsrrswapns_comp210889_c2_seq2	ELAV2_XENLA	ELAV2_HUMAN	ELAV-like protein 2 (ELAV-like neuronal protein 1) (Hu-antigen B) (HuB) (Nervous system-specific RNA-binding protein Hel-N1)	-3	22	0	35	1.4	380	263.097	Ambiguous		41.633	42.709	39.504		D.C.	9291
CL9395Contig1	B7ZRW2_XENLA	EPAB2_HUMAN	Embryonic polyadenylate-binding protein 2 (Embryonic poly(A)-binding protein 2) (ePABP-2) (ePABP2) (Embryonic poly(A)-binding protein type II) (Poly(A)-binding protein nuclear-like 1)	-0.09	240	190	3900	1.4	280	193.951	Ambiguous		24.171	24.171	30.386		D.C.	8578
CL1144Contig2	Q7ZTL0_XENLA	ECHB_HUMAN	Trifunctional enzyme subunit beta, mitochondrial (TP-beta) [Includes: 3-ketoacyl-CoA thiolase (EC 2.3.1.16) (Acetyl-CoA acyltransferase) (Beta-ketothiolase)]				170	1.4	210	156.815	Ambiguous		50.514	99.014	51.294	MT	D.C.	711
CL4225Contig2	CSK2B_XENLA	CSK2B_HUMAN	Casein kinase II subunit beta (CK II beta) (Phosvitin) (Protein G5a)	0.83	310	2100	940	1.4	180	133.405	Ambiguous		24.96	24.96	24.942		D.C.	5472
CL5266Contig1	Q0P4V5_XENTR	DDX43_HUMAN	Probable ATP-dependent RNA helicase DDX43 (EC 3.6.4.13) (Cancer/testis antigen 13) (CT13) (DEAD box protein 43) (DEAD box protein HAGE) (Helical antigen)	-0.33	120	55	170	1.4	65	45.7596	Ambiguous		75.339	68.365	72.844		D.C.	6313
CL538Contig4	Q7SY66_XENLA	SNR40_HUMAN	U5 small nuclear ribonucleoprotein 40 kDa protein (U5 snRNP 40 kDa protein) (U5-40K) (38 kDa-splicing factor) (Prp8-binding protein) (hPRP8BP) (U5 snRNP-specific 40 kDa protein) (WD repeat-containing protein 57)	2.81	0.7	450	220	1.4	16	11.0686	Ambiguous		38.345	37.534	39.311		D.C.	6404
CL282Contig1	PAIP1_XENLA	PAIP1_HUMAN	Polyadenylate-binding protein-interacting protein 1 (PABP-interacting protein 1) (PAIP-1) (Poly(A)-binding protein-interacting protein 1)	-1.22	23	1.4	49	1.4	3.5	2.47208	Ambiguous		51.222	51.223	53.525		D.C.	4020
CL10561Contig1	Q6DFK4_XENLA	ETAA1_HUMAN	Ewing's tumor-associated antigen 1 (Ewing's tumor-associated antigen 16)	1.64	0.4	19	15	1.4	1.1	0.736706	Ambiguous		89.973	213.145	103.44		D.C.	394
CL8525Contig2	F7CYJ0_XENTR	SNPC4_HUMAN	snRNA-activating protein complex subunit 4 (SNAPc subunit 4) (Proximal sequence element-binding transcription factor subunit alpha) (PSE-binding factor subunit alpha) (PTF subunit alpha) (snRNA-activating protein complex 190 kDa subunit) (SNAPc 190 kDa subunit)	3	0	77	9.7	1.4	0.7	0.511074	Ambiguous		150.54	72.112	159.433		D.C.	8179
zeinaSSns_comp378075_c0_seq2	Q7ZYI8_XENLA	LC7L2_HUMAN	Putative RNA-binding protein Luc7-like 2	3	0	340	9.4	1.4	0.67	0.47603	Ambiguous		43.705	38.045	46.514		D.C.	10901
CL577Contig6	B3DM58_XENTR	PTN23_HUMAN	Tyrosine-protein phosphatase non-receptor type 23 (EC 3.1.3.48) (His domain-containing protein tyrosine phosphatase) (HD-PTP) (Protein tyrosine phosphatase TD14) (PTP-TD14)	-3	3.6	0	5	1.4	0.35	0.251044	Ambiguous	Thakar	211.99	96.947	178.974		D.C.	6676
CL1078Contig4	B1H1S2_XENLA	U520_HUMAN	U5 small nuclear ribonucleoprotein 200 kDa helicase (EC 3.6.4.13) (Activating signal cointegrator 1 complex subunit 3-like 1) (BRR2 homolog) (U5 snRNP-specific 200 kDa protein) (U5-200KD)	0.54	130	450	780	1.3	56	42.156	Ambiguous		244.48	103.027	244.508		D.C.	476
CL589Contig3	Q7ZYT5_XENLA	HDAC2_HUMAN	Histone deacetylase 2 (HD2) (EC 3.5.1.98)	1.64	25	1100	630	1.3	45	33.4334	Ambiguous		54.939	54.94	55.364		D.C.	6766
CL4097Contig2	Q6GNE3_XENLA	ARP10_HUMAN	Actin-related protein 10 (Actin-related protein 11) (hARP11)	-3	61	0	420	1.3	30	22.5663	Ambiguous		46.334	46.335	46.307		D.C.	5353
CL7527Contig1	ELP2_XENTR	ELP2_HUMAN	Elongator complex protein 2 (ELP2) (SHINC-2) (STAT3-interacting protein 1) (StIP1)	-1.5	49	1.5	370	1.3	26	20.3742	Ambiguous		90.65	46.762	92.5		D.C.	7700
CL1274Contig1	Q8AVK6_XENLA	VP37B_HUMAN	Vacuolar protein sorting-associated protein 37B (hVps37B) (ESCRT-I complex subunit VPS37B)	-0.91	87	11	200	1.3	14	10.8602	Ambiguous	BioGrid	31.473	31.473	31.307		D.C.	1152
CL5619Contig1	RM24_XENLA	RM24_HUMAN	39S ribosomal protein L24, mitochondrial (L24mt) (MRP-L24)				140	1.3	10	8.0106	Ambiguous		25.184	25.171	24.915	MT	D.C.	6562
CL27Contig17	ESRP1_XENLA	ESRP1_HUMAN	Epithelial splicing regulatory protein 1 (RNA-binding motif protein 35A) (RNA-binding protein 35A)	0.29	18	36	120	1.3	8.2	6.11717	Ambiguous		76.459	76.426	75.585		D.C.	3976
CL391Contig6	Q52KT1_XENLA	SF3B2_HUMAN	Splicing factor 3B subunit 2 (Pre-mRNA-splicing factor SF3b 145 kDa subunit) (SF3b145) (SF3b150) (Spliceosome-associated protein 145) (SAP 145)	2.05	5.4	600	40	1.3	7.4	5.7346	Ambiguous		85.311	85.953	100.228		D.C.	5142
zeinaSSns_comp387481_c1_seq1	PCID2_XENLA	PCID2_HUMAN	PCI domain-containing protein 2 (CSN12-like protein)	0.59	23	92	83	1.3	5.9	4.51537	Ambiguous		46.124	46.163	46.03		D.C.	11098
CL35Contig21	F7AWS2_XENTR	SPT6H_HUMAN	Transcription elongation factor SPT6 (hSPT6) (Histone chaperone suppressor of Ty6) (Tat-cotransactivator 2 protein) (Tat-CT2 protein)	3	0	150	81	1.3	5.8	4.37811	Ambiguous		204		199.073		D.C.	4798
CL9655Contig1	Q6DJR6_XENTR	EXOC3_HUMAN	Exocyst complex component 3 (Exocyst complex component Sec6)	-1.2	13	0.8	35	1.3	2.5	1.94604	Ambiguous		86.454		86.845		D.C.	8676
CL3085Contig2	F6UM54_XENTR	HIRP3_HUMAN	HIRA-interacting protein 3	3	0.3	410	18	1.3	1.3	0.972571	Ambiguous		74.564		61.957		D.C.	4298
CL1889Contig5	Q63ZU1_XENLA	AN13A_HUMAN	Ankyrin repeat domain-containing protein 13A (Protein KE03)	-3	27	0	13	1.3	0.94	0.723502	Ambiguous		69.711	67.89	67.619		D.C.	2448
CL4936Contig2	B1WBE1_XENLA	STRP1_HUMAN	Striatin-interacting protein 1 (Protein FAM40A)	-3	1	0	8.6	1.3	0.61	0.463992	Ambiguous		94.168	60.625	95.576		D.C.	6037
CL2956Contig1	F7DXG0_XENTR	TTI1_HUMAN	TELO2-interacting protein 1 homolog (Protein SMG10)	-3	5.1	0	4.5	1.3	0.32	0.25492	Ambiguous		114.72		122.069		D.C.	4150
dsrrswapns_comp216638_c5_seq6	Q6INF7_XENLA	CSK21_HUMAN	Casein kinase II subunit alpha (CK II alpha) (EC 2.7.11.1)	0.66	160	730	2800	1.2	200	164.342	Ambiguous		41.242	41.287	45.144		D.C.	9728
dsrrswapns_comp210711_c0_seq2	Q6NU97_XENLA	PCTL_HUMAN	PCTP-like protein (PCTP-L) (Antigen NY-CO-28) (START domain-containing protein 10) (StARD10) (Serologically defined colon cancer antigen 28) (StAR-related lipid transfer protein 10)	-0.39	420	170	1200	1.2	86	71.8696	Ambiguous		30.49	30.793	33.049		D.C.	9284
TC442344	ELV1B_XENLA	ELAV1_HUMAN	ELAV-like protein 1 (Hu-antigen R) (HuR)	0.37	100	240	430	1.2	31	25.7731	Ambiguous	BioGrid	36.139	36.008	36.092		D.C.	10601
CL14686Contig1	Q66IU2_XENLA	RM02_HUMAN	39S ribosomal protein L2, mitochondrial (L2mt) (MRP-L2)				120	1.2	8.3	6.86019	Ambiguous		31.955	31.955	33.301	MT	D.C.	1649
CL1964Contig2	Q08D74_XENTR	CUL4A_HUMAN	Cullin-4A (CUL-4A)	0.59	16	61	64	1.2	4.6	3.92256	Ambiguous		87.94	99.075	87.68		D.C.	2596
CL7371Contig2	F7CKF2_XENTR	SKIV2_HUMAN	Helicase SKI2W (Ski2) (EC 3.6.4.-) (Helicase-like protein) (HLP)	-2.55	170	0.5	61	1.2	4.3	3.51838	Ambiguous		139.78		137.755		D.C.	7626
CL433Contig6	A4IFX6_XENLA	A16L1_HUMAN	Autophagy-related protein 16-1 (APG16-like 1)	-0.8	7.1	1.1	40	1.2	2.9	2.42523	Ambiguous		68.023	69.891	68.265		D.C.	5572
CL1Contig215	A3KND7_XENLA	R113A_HUMAN	RING finger protein 113A (Zinc finger protein 183)	3	0.1	530	31	1.2	2.2	1.79348	Ambiguous		36.672	36.698	38.787		D.C.	2783
zeinaSSns_comp389283_c0_seq3	TF3A_XENLA	TF3A_HUMAN	Transcription factor IIIA (TFIIIA)	-2.55	460	1.3	800	1.1	8100	7373.35	Ambiguous	NESdbO	41.9	41.911	41.515		D.C.	11263
CL3640Contig2	YBX2B_XENLA	YBOX2_HUMAN	Y-box-binding protein 2 (Contrin) (DNA-binding protein C) (Dbpc) (Germ cell-specific Y-box-binding protein) (MSY2 homolog)	-1.86	4300	60	210	1.1	7600	6883.53	Ambiguous		37.361	36.176	38.518		D.C.	4842
CL4574Contig1	Q801P7_XENLA	ARP3_HUMAN	Actin-related protein 3 (Actin-like protein 3)	-2.45	900	3.2	2200	1.1	530	501.557	Ambiguous		50.451	47.29	47.371		D.C.	5754
CL85Contig15	Q6INF7_XENLA	CSK22_HUMAN	Casein kinase II subunit alpha' (CK II alpha') (EC 2.7.11.1)	0.97	150	1400	2800	1.1	200	178.587	Ambiguous		41.287	41.287	41.213		D.C.	8216
CL9641Contig1	LRC40_XENLA	LRC40_HUMAN	Leucine-rich repeat-containing protein 40	-0.07	510	440	150	1.1	190	174.302	Ambiguous		67.817	67.105	68.25		D.C.	8669
CL2863Contig4	Q7ZYS4_XENLA	PDLI1_HUMAN	PDZ and LIM domain protein 1 (C-terminal LIM domain protein 1) (Elfin) (LIM domain protein CLP-36)	-0.24	370	220	220	1.1	160	149.673	Ambiguous		35.54	35.54	36.072		D.C.	4060
CL2939Contig1	Q7ZX28_XENLA	PRP8_HUMAN	Pre-mRNA-processing-splicing factor 8 (220 kDa U5 snRNP-specific protein) (PRP8 homolog) (Splicing factor Prp8) (p220)	0.5	94	300	610	1.1	44	38.8143	Ambiguous		273.61	273.621	273.6		D.C.	4132
CL121Contig7	Q6DK94_XENTR	SRSF5_HUMAN	Serine/arginine-rich splicing factor 5 (Delayed-early protein HRS) (Pre-mRNA-splicing factor SRP40) (Splicing factor, arginine/serine-rich 5)	2.22	9.4	1500	600	1.1	43	40.7781	Ambiguous		24.076	356.969	31.264		D.C.	989
CL20134Contig1	Q66IK3_XENTR	DNJB1_HUMAN	DnaJ homolog subfamily B member 1 (DnaJ protein homolog 1) (Heat shock 40 kDa protein 1) (HSP40) (Heat shock protein 40) (Human DnaJ protein 1) (hDj-1)	0.19	140	210	160	1.1	20	17.9208	Ambiguous		38.314	38.537	38.044		D.C.	2921
CL234Contig1	ARHA_XENLA	ARH_HUMAN	Low density lipoprotein receptor adapter protein 1 (Autosomal recessive hypercholesterolemia protein)	-0.36	12	5.1	130	1.1	9.3	8.25152	Ambiguous		36.093	34.121	33.885		D.C.	3392
CL7962Contig2	EXOS6_XENTR	EXOS6_HUMAN	Exosome complex component MTR3 (Exosome component 6) (mRNA transport regulator 3 homolog) (hMtr3) (p11)	0.57	57	220	100	1.1	7.2	6.3269	Ambiguous		28.525	27.403	28.235		D.C.	7926
zeinaSSns_comp388861_c0_seq1	CA1AA_XENLA	CAF1A_HUMAN	Chromatin assembly factor 1 subunit A (CAF-1 subunit A) (Chromatin assembly factor I p150 subunit) (CAF-I 150 kDa subunit) (CAF-I p150) (hp150)	2.21	2.7	440	59	1.1	4.2	3.75228	Ambiguous		99.744	101.067	106.926		D.C.	11217
CL4986Contig1	B7ZQK1_XENLA	TAB1_HUMAN	TGF-beta-activated kinase 1 and MAP3K7-binding protein 1 (Mitogen-activated protein kinase kinase kinase 7-interacting protein 1) (TGF-beta-activated kinase 1-binding protein 1) (TAK1-binding protein 1)	-0.71	57	11	53	1.1	3.8	3.30973	Ambiguous		54.601	54.397	54.644		D.C.	6078
CL2342Contig3	BOP1B_XENLA	BOP1_HUMAN	Ribosome biogenesis protein BOP1 (Block of proliferation 1 protein)	3	0	260	19	1.1	1.4	1.24963	Ambiguous		83.45	83.465	83.63		D.C.	3385
CL8843Contig1	Q6DDY8_XENLA	ERCC5_HUMAN	DNA repair protein complementing XP-G cells (EC 3.1.-.-) (DNA excision repair protein ERCC-5) (Xeroderma pigmentosum group G-complementing protein)	3	0	84	9.1	1.1	0.65	0.582222	Ambiguous		134.3	134.332	133.108		D.C.	8318
CL43Contig5	F6R4V1_XENTR	DESP_HUMAN	Desmoplakin (DP) (250/210 kDa paraneoplastic pemphigus antigen)	0.19	2.3	3.6	3.2	1.1	0.61	0.542612	Ambiguous		230.33	170.24	331.774		D.C.	5612
CL7380Contig1	Q498J3_XENLA	ELMO1_HUMAN	Engulfment and cell motility protein 1 (Protein ced-12 homolog)	-3	20	0	5.8	1.1	0.42	0.364379	Ambiguous		88.839	83.775	83.829		D.C.	7631
CL3708Contig1	F6XIT5_XENTR	RN213_HUMAN	E3 ubiquitin-protein ligase RNF213 (EC 6.3.2.-) (ALK lymphoma oligomerization partner on chromosome 17) (Mysterin) (RING finger protein 213)	-2.18	10	0.1	5.6	1.1	0.4	0.359063	Ambiguous		454.44		591.407		D.C.	4927
CL702Contig1	A0JPA9_XENTR	ATG2B_HUMAN	Autophagy-related protein 2 homolog B	-3	2.5	0	2.7	1.1	0.19	0.172776	Ambiguous		232.45		232.763		D.C.	7461
CL2625Contig4	Q0IH88_XENLA	ARPC2_HUMAN	Actin-related protein 2/3 complex subunit 2 (Arp2/3 complex 34 kDa subunit) (p34-ARC)	-1.83	630	9.2	3200	1	230	226.496	Ambiguous		34.398	34.352	34.333		D.C.	3784
CL1455Contig3	Q7ZXZ9_XENLA	U5S1_HUMAN	116 kDa U5 small nuclear ribonucleoprotein component (Elongation factor Tu GTP-binding domain-containing protein 2) (SNU114 homolog) (hSNU114) (U5 snRNP-specific protein, 116 kDa) (U5-116 kDa)	0.36	290	660	1800	1	130	126.412	Ambiguous		109.7	109.703	109.436		D.C.	1627
CL419Contig3	Q7ZXF4_XENLA	C1TC_HUMAN	C-1-tetrahydrofolate synthase, cytoplasmic (C1-THF synthase) [Cleaved into: C-1-tetrahydrofolate synthase, cytoplasmic, N-terminally processed] [Includes: Methylenetetrahydrofolate dehydrogenase (EC 1.5.1.5); Methenyltetrahydrofolate cyclohydrolase (EC 3.5.4.9); Formyltetrahydrofolate synthetase (EC 6.3.4.3)]	-1.15	380	27	370	1	65	62.6982	Ambiguous		100.55	100.549	101.559		D.C.	5447
CL38Contig12	PURBB_XENLA	PURB_HUMAN	Transcriptional activator protein Pur-beta (Purine-rich element-binding protein B)	-3	58	0	670	1	48	47.8876	Ambiguous		34.986	34.987	33.241		D.C.	5115
CL3285Contig2	Q6AZK2_XENLA	PURA_HUMAN	Transcriptional activator protein Pur-alpha (Purine-rich single-stranded DNA-binding protein alpha)	-3	120	0	650	1	46	46.464	Ambiguous		33.881	31.556	34.911		D.C.	4467
dsrrswapns_comp214263_c1_seq2	Q6NTU2_XENLA	DCTN3_HUMAN	Dynactin subunit 3 (Dynactin complex subunit 22 kDa subunit) (p22)	-3	98	0	400	1	29	27.2648	Ambiguous		21.221	21.136	21.119		D.C.	3352
CL8887Contig1	B1H203_XENTR	HTRA2_HUMAN	Serine protease HTRA2, mitochondrial (EC 3.4.21.108) (High temperature requirement protein A2) (HtrA2) (Omi stress-regulated endoprotease) (Serine protease 25) (Serine proteinase OMI)				260	1	19	18.0971	Ambiguous		42.808	48.991	48.841	TM;MT	D.C.	8335
CL5083Contig1	A5PKN1_XENLA	TRM2A_HUMAN	tRNA (uracil-5-)-methyltransferase homolog A (EC 2.1.1.-) (HpaII tiny fragments locus 9c protein)	3	0.3	440	240	1	17	16.5697	Ambiguous		70.375	69.445	68.726		D.C.	6166
CL15685Contig1	RM45_XENLA	RM45_HUMAN	39S ribosomal protein L45, mitochondrial (L45mt) (MRP-L45)				210	1	15	15.3316	Ambiguous		36.982	35.351	35.351	MT	D.C.	1907
CL3929Contig2	Q7T0W4_XENLA	VPS28_HUMAN	Vacuolar protein sorting-associated protein 28 homolog (H-Vps28) (ESCRT-I complex subunit VPS28)	-0.56	140	39	180	1	13	12.453	Ambiguous		25.44	25.44	25.425		D.C.	5152
CL4629Contig2	O93478_XENLA	KIF3B_HUMAN	Kinesin-like protein KIF3B (HH0048) (Microtubule plus end-directed kinesin motor 3B) [Cleaved into: Kinesin-like protein KIF3B, N-terminally processed]	-3	32	0	110	1	8.2	8.06745	Ambiguous		85	84.873	85.125		D.C.	5801
CL1900Contig3	F6ZKV9_XENTR	DDX46_HUMAN	Probable ATP-dependent RNA helicase DDX46 (EC 3.6.4.13) (DEAD box protein 46) (PRP5 homolog)	3	0.2	320	43	1	3.1	3.07663	Ambiguous		119.15	104.079	117.362		D.C.	2475
zeinaSSns_comp380905_c0_seq5	Q3C2L7_XENLA			2.08674	3.8	460	18	0.99	1.3	1.28175	Ambiguous		64.111	64.084			D.C.	9062
CL15694Contig1	Q4QR02_XENLA	RM39_HUMAN	39S ribosomal protein L39, mitochondrial (L39mt) (MRP-L39) (39S ribosomal protein L5, mitochondrial) (L5mt) (MRP-L5)				460	0.98	33	33.5797	Ambiguous		40.41	34.709	38.712		D.C.	1909
CL2535Contig4	H6SHB1_XENLA	GOGA3_HUMAN	Golgin subfamily A member 3 (Golgi complex-associated protein of 170 kDa) (GCP170) (Golgin-160)	-0.83	5.5	0.8	16	0.98	1.1	1.16277	Ambiguous		158.02	43.472	167.355		D.C.	3638
CL1360Contig5	Q6DFM0_XENLA	SMCA5_HUMAN	SWI/SNF-related matrix-associated actin-dependent regulator of chromatin subfamily A member 5 (SWI/SNF-related matrix-associated actin-dependent regulator of chromatin A5) (EC 3.6.4.-) (Sucrose nonfermenting protein 2 homolog) (hSNF2H)	2.23	4.2	720	330	0.97	24	24.3235	Ambiguous		122.09	122.078	121.905		D.C.	1407
TC420836	P4R2A_XENLA	PP4R2_HUMAN	Serine/threonine-protein phosphatase 4 regulatory subunit 2	3	0	210	91	0.97	6.5	6.71273	Ambiguous		44.554	44.554	46.898		D.C.	10432
CL6091Contig3	CFA20_XENLA	CP080_HUMAN	Cilia- and flagella-associated protein 20 (Basal body up-regulated protein 22) (Transcription factor IIB)	0.59	84	330	660	0.96	47	49.626	Ambiguous		22.734	22.734	22.774		D.C.	6892
CL89Contig15	O73732_XENLA	ROCK2_HUMAN	Rho-associated protein kinase 2 (EC 2.7.11.1) (Rho kinase 2) (Rho-associated, coiled-coil-containing protein kinase 2) (Rho-associated, coiled-coil-containing protein kinase II) (ROCK-II) (p164 ROCK-2)	-1.44	20	0.7	72	0.96	5.2	5.37873	Ambiguous		159.24	159.285	160.9		D.C.	8388
CL12812Contig1	Q3KQ87_XENLA	AGAL_HUMAN	Alpha-galactosidase A (EC 3.2.1.22) (Alpha-D-galactosidase A) (Alpha-D-galactoside galactohydrolase) (Melibiase) (Agalsidase)				37	0.96	2.7	2.80179	Ambiguous		46.402	46.402	48.767	ER	D.C.	1167
CL169Contig11	F6UY01_XENTR	NADAP_HUMAN	Kanadaptin (Human lung cancer oncogene 3 protein) (HLC-3) (Kidney anion exchanger adapter protein) (Solute carrier family 4 anion exchanger member 1 adapter protein)	2.07	1.5	180	26	0.96	1.8	1.90017	Ambiguous		99.901	44.288	88.814		D.C.	2103
zeinaSSns_comp389457_c1_seq2	Q6GPS9_XENLA	ECHA_HUMAN	Trifunctional enzyme subunit alpha, mitochondrial (78 kDa gastrin-binding protein) (TP-alpha) [Includes: Long-chain enoyl-CoA hydratase (EC 4.2.1.17); Long chain 3-hydroxyacyl-CoA dehydrogenase (EC 1.1.1.211)]				17	0.94	130	132.99	Ambiguous		75.565	82.36	83	MT	D.C.	11286
CL341Contig2	SF3B1_XENLA	SF3B1_HUMAN	Splicing factor 3B subunit 1 (Pre-mRNA-splicing factor SF3b 155 kDa subunit) (SF3b155) (Spliceosome-associated protein 155) (SAP 155)	1.97	7.9	740	31	0.93	19	19.9406	Ambiguous		146.21	146.215	145.83		D.C.	4612
dsrrswapns_comp202427_c0_seq1	Q6GLF4_XENTR	SSRP1_HUMAN	FACT complex subunit SSRP1 (Chromatin-specific transcription elongation factor 80 kDa subunit) (Facilitates chromatin transcription complex 80 kDa subunit) (FACT 80 kDa subunit) (FACTp80) (Facilitates chromatin transcription complex subunit SSRP1) (Recombination signal sequence recognition protein 1) (Structure-specific recognition protein 1) (hSSRP1) (T160)	1.87	23	1700	1000	0.92	72	77.7043	Ambiguous		75.412	78.668	81.075		D.C.	5450
CL885Contig5	Q802A8_XENLA	CBX3_HUMAN	Chromobox protein homolog 3 (HECH) (Heterochromatin protein 1 homolog gamma) (HP1 gamma) (Modifier 2 protein)	2.1	6.5	820	410	0.92	29	31.5298	Ambiguous		20.237	19.908	20.811		D.C.	8325
CL6426Contig1	Q5FWQ3_XENLA	IF172_HUMAN	Intraflagellar transport protein 172 homolog	-3	4.1	0	21	0.91	1.5	1.68099	Ambiguous		197.9	135.742	197.576		D.C.	7102
dsrrswapns_comp208790_c0_seq2	Q68FI4_XENLA	ARPC5_HUMAN	Actin-related protein 2/3 complex subunit 5 (Arp2/3 complex 16 kDa subunit) (p16-ARC)	-1.91	750	9.2	2900	0.9	210	231.025	Ambiguous		16.399	16.4	16.32		D.C.	9199
CL10799Contig1	Q7T0Y5_XENLA	ACADS_HUMAN	Short-chain specific acyl-CoA dehydrogenase, mitochondrial (SCAD) (EC 1.3.8.1) (Butyryl-CoA dehydrogenase)				1400	0.9	99	110.844	Ambiguous		44.391	93.912	44.297	MT	D.C.	477
CL215Contig8	BZW1_XENLA	BZW1_HUMAN	Basic leucine zipper and W2 domain-containing protein 1 (Protein Orf)	-1.57	470	13	780	0.9	56	61.8695	Ambiguous		48.137	48.137	48.043		D.C.	3140
CL3107Contig2	Q6PA71_XENLA	PUR1_HUMAN	Amidophosphoribosyltransferase (ATase) (EC 2.4.2.14) (Glutamine phosphoribosylpyrophosphate amidotransferase) (GPAT)	-0.26	380	210	1.5	0.88	210	242.384	Ambiguous		55.806	55.866	57.399		D.C.	4317
CL9833Contig1	Q6DKL9_XENLA	RM17_HUMAN	39S ribosomal protein L17, mitochondrial (L17mt) (MRP-L17) (LYST-interacting protein 2)				160	0.88	12	13.2205	Ambiguous		19.572	19.572	20.05	MT	D.C.	8755
zeinaSSns_comp388324_c3_seq2	Q03292_XENLA	ABI2_HUMAN	Abl interactor 2 (Abelson interactor 2) (Abi-2) (Abl-binding protein 3) (AblBP3) (Arg-binding protein 1) (ArgBP1)	-1.81	39	0.6	140	0.88	10	11.7609	Ambiguous		56.714	34.257	55.663		D.C.	2747
CL1006Contig2	Q7ZTN2_XENLA	VIGLN_HUMAN	Vigilin (High density lipoprotein-binding protein) (HDL-binding protein)	-2.35	270	1.2	1500	0.87	38	44.1009	Ambiguous		143.18	48.614	141.456		D.C.	204
CL18845Contig1	Q6DD58_XENLA	TBA4A_HUMAN	Tubulin alpha-4A chain (Alpha-tubulin 1) (Testis-specific alpha-tubulin) (Tubulin H2-alpha) (Tubulin alpha-1 chain)	-1.41	300	12	12	0.86	68	79.3603	Ambiguous		49.887	49.887	49.924		D.C.	2435
CL4732Contig1	CRBN_XENTR	CRBN_HUMAN	Protein cereblon	0.78	1.3	7.9	31	0.86	2.2	2.56452	Ambiguous		50.623		50.546		D.C.	5882
CL750Contig5	F6ZI40_XENTR	SF3B3_HUMAN	Splicing factor 3B subunit 3 (Pre-mRNA-splicing factor SF3b 130 kDa subunit) (SF3b130) (STAF130) (Spliceosome-associated protein 130) (SAP 130)	1.66	15	670	340	0.84	26	31.4939	Ambiguous		135.56	126.833	135.577		D.C.	7691
zeinaSSns_comp389328_c0_seq2	Q68FK2_XENLA	S23IP_HUMAN	SEC23-interacting protein (p125)	-3	13	0	15	0.84	1.1	1.26229	Ambiguous		104.86	112.026	111.076		D.C.	11271
CL7494Contig2	Q6DD69_XENLA	PFKAM_HUMAN	ATP-dependent 6-phosphofructokinase, muscle type (ATP-PFK) (PFK-M) (EC 2.7.1.11) (6-phosphofructokinase type A) (Phosphofructo-1-kinase isozyme A) (PFK-A) (Phosphohexokinase)	-3	710	0.5	37	0.83	140	164.545	Ambiguous		88.311	88.312	85.183		D.C.	7680
CL11811Contig1	Q0IHC2_XENLA	KTNA1_HUMAN	Katanin p60 ATPase-containing subunit A1 (Katanin p60 subunit A1) (EC 3.6.4.3) (p60 katanin)	0.44	24	67	40	0.83	2.9	3.49209	Ambiguous		55.602	45.353	55.965		D.C.	852
dsrrswapns_comp216674_c7_seq7	F6UUG0_XENTR	OTUD4_HUMAN	OTU domain-containing protein 4 (EC 3.4.19.12) (HIV-1-induced protein HIN-1)	-3	38	0	15	0.83	1.1	1.30869	Ambiguous		118.37		124.045		D.C.	9733
dsrrswapns_comp213483_c2_seq6	MP2K1_XENLA	MP2K1_HUMAN	Dual specificity mitogen-activated protein kinase kinase 1 (MAP kinase kinase 1) (MAPKK 1) (MKK1) (EC 2.7.12.2) (ERK activator kinase 1) (MAPK/ERK kinase 1) (MEK 1)	-1.09	1100	89	8100	0.82	580	706.018	Ambiguous	NESdbX, BioGrid	43.742	43.742	43.439		D.C.	9455
CL11162Contig1	A2RV65_XENLA	OVCH1_HUMAN	Ovochymase-1 (EC 3.4.21.-)				290	0.82	21	25.6544	Ambiguous		168.12	31.747	125.066	ER	D.C.	611
CL10899Contig1	Q6IRC3_XENLA	DCTN6_HUMAN	Dynactin subunit 6 (Dynactin subunit p27) (Protein WS-3)	-3	88	0	420	0.81	30	37.4957	Ambiguous		22.271	144.402	20.747		D.C.	521
CL355Contig5	Q08AX4_XENLA	P66A_HUMAN	Transcriptional repressor p66-alpha (Hp66alpha) (GATA zinc finger domain-containing protein 2A)	2.08	5.8	700	100	0.81	7.4	9.08473	Ambiguous		60.834	60.835	68.063		D.C.	4752
CL4227Contig1	TTC37_XENLA	TTC37_HUMAN	Tetratricopeptide repeat protein 37 (TPR repeat protein 37) (SKI3 homolog) (Ski3) (Tricho-hepatic-enteric syndrome protein) (Thespin)	-3	120	0	30	0.8	2.1	2.68133	Ambiguous		181.43	175.385	175.486		D.C.	5473
zeinaSSns_comp388272_c2_seq1	Q6NTU9_XENLA	DNJC2_HUMAN	DnaJ homolog subfamily C member 2 (M-phase phosphoprotein 11) (Zuotin-related factor 1) [Cleaved into: DnaJ homolog subfamily C member 2, N-terminally processed]	-3	200	0	120	0.79	8.4	10.6639	Ambiguous		75.044	40.363	71.996		D.C.	11164
CL8921Contig1	T2FB_XENLA	T2FB_HUMAN	General transcription factor IIF subunit 2 (EC 3.6.4.12) (ATP-dependent helicase GTF2F2) (General transcription factor IIF 30 kDa subunit) (Transcription initiation factor IIF subunit beta) (TFIIF-beta) (Transcription initiation factor RAP30)	3	0	410	50	0.79	3.6	4.56805	Ambiguous		30.14	30.14	28.38		D.C.	8353
CL9937Contig1	Q66KF7_XENLA	IFT52_HUMAN	Intraflagellar transport protein 52 homolog (Protein NGD5 homolog)	-3	7.6	0	18	0.79	1.3	1.59507	Ambiguous		54.035	50.095	49.706		D.C.	8811
CL1300Contig1	Q6IRM7_XENLA	ANS1A_HUMAN	Ankyrin repeat and SAM domain-containing protein 1A (Odin)	-1.67	2.6	0.1	3.1	0.79	0.22	0.28202	Ambiguous		119.31	119.307	123.108		D.C.	1221
CL1402Contig2	Q6NRV3_XENLA	TBA1A_HUMAN	Tubulin alpha-1A chain (Alpha-tubulin 3) (Tubulin B-alpha-1) (Tubulin alpha-3 chain)	-1.61	700	17	28	0.78	170	221.656	Ambiguous		33.753	50.2	50.136		D.C.	1520
CL123Contig10	Q6IP29_XENLA	ROA1_HUMAN	Heterogeneous nuclear ribonucleoprotein A1 (hnRNP A1) (Helix-destabilizing protein) (Single-strand RNA-binding protein) (hnRNP core protein A1) [Cleaved into: Heterogeneous nuclear ribonucleoprotein A1, N-terminally processed]	1.41	50	1300	1200	0.78	83	107.115	Ambiguous		37.901	70.882	38.747		D.C.	1049
CL4496Contig2	Q6DD36_XENLA	OXSR1_HUMAN	Serine/threonine-protein kinase OSR1 (EC 2.7.11.1) (Oxidative stress-responsive 1 protein)	-1.29	200	10	390	0.78	28	36.4067	Ambiguous		58.059	58.059	58.022		D.C.	5690
dsrrswapns_comp209724_c0_seq2	TRBP2_XENLA	TRBP2_HUMAN	RISC-loading complex subunit TARBP2 (TAR RNA-binding protein 2) (Trans-activation-responsive RNA-binding protein)	-2.88	96	0.1	120	0.78	8.7	11.1194	Ambiguous		40.006	38.172	39.039		D.C.	9235
CL2257Contig2	Q3MQ02_XENLA	ATG5_HUMAN	Autophagy protein 5 (APG5-like) (Apoptosis-specific protein)	-1.56	16	0.4	91	0.78	6.5	8.36868	Ambiguous		32.553	32.71	32.447		D.C.	3264
CL8188Contig2	A4QNC0_XENTR	VP33B_HUMAN	Vacuolar protein sorting-associated protein 33B (hVPS33B)	-0.44	39	14	77	0.78	5.5	7.04946	Ambiguous		70.291	68.191	70.585		D.C.	8028
CL5778Contig1	Q4V7I7_XENLA	WBS16_HUMAN	Williams-Beuren syndrome chromosomal region 16 protein (RCC1-like G exchanging factor-like protein)				15	0.78	1.1	1.35466	Ambiguous		49.823	49.824	49.997		D.C.	6671
CL10967Contig1	Q4V7H4_XENLA			-0.588093	1200	320	7600	0.77	540	706.715	Ambiguous		30.266	78.088			D.C.	538
CL628Contig3	Q6GMZ1_XENLA	RTCA_HUMAN	RNA 3'-terminal phosphate cyclase (RNA cyclase) (RNA-3'-phosphate cyclase) (EC 6.5.1.4) (RNA terminal phosphate cyclase domain-containing protein 1) (RTC domain-containing protein 1)	-0.15	580	410	1100	0.77	290	372.404	Ambiguous		43.92	37.823	39.337		D.C.	7000
dsrrswapns_comp214140_c0_seq6	RB24B_XENLA	RBM24_HUMAN	RNA-binding protein 24 (RNA-binding motif protein 24) (RNA-binding region-containing protein 6)	-0.63	37	8.6	13	0.77	0.92	1.2005	Ambiguous		13.329	24.076	24.776		D.C.	1420
CL11274Contig1	Q6PHL7_XENLA	ELOB_HUMAN	Transcription elongation factor B polypeptide 2 (Elongin 18 kDa subunit) (Elongin-B) (EloB) (RNA polymerase II transcription factor SIII subunit B) (SIII p18)	0.52	190	620	270	0.76	20	25.7818	Ambiguous		13.312	115.375	13.133		D.C.	653
CL14882Contig1	Q5M780_XENLA	RM13_HUMAN	39S ribosomal protein L13, mitochondrial (L13mt) (MRP-L13)				150	0.76	10	13.7724	Ambiguous		20.666	20.666	20.692		D.C.	1699
zeinaSSns_comp386728_c0_seq1	Q9PUM8_XENLA	MBD3_HUMAN	Methyl-CpG-binding domain protein 3 (Methyl-CpG-binding protein MBD3)	2.22	2.8	470	93	0.76	6.7	8.76773	Ambiguous		34.078	34.079	32.844		D.C.	11065
CL1784Contig2	Q498F1_XENLA	UBR2_HUMAN	E3 ubiquitin-protein ligase UBR2 (EC 6.3.2.-) (N-recognin-2) (Ubiquitin-protein ligase E3-alpha-2) (Ubiquitin-protein ligase E3-alpha-II)	0.28	8.2	16	59	0.76	4.2	5.52972	Ambiguous		200.2	198.696	200.538		D.C.	2249
CL20Contig6	ARP2B_XENLA	ARP2_HUMAN	Actin-related protein 2 (Actin-like protein 2)	-2.61	550	1.4	2500	0.75	180	234.515	Ambiguous		44.679	44.68	44.761		D.C.	3047
CL34Contig6	Q6DE28_XENLA	HS105_HUMAN	Heat shock protein 105 kDa (Antigen NY-CO-25) (Heat shock 110 kDa protein)	-0.75	180	31	490	0.75	35	46.5613	Ambiguous	NESdbO	95.767	95.768	96.865		D.C.	4682
CL1Contig857	Q641G7_XENLA	ARPC4_HUMAN	Actin-related protein 2/3 complex subunit 4 (Arp2/3 complex 20 kDa subunit) (p20-ARC)	-1.75	970	17	6600	0.74	470	635.346	Ambiguous		21.125	19.692	19.667		D.C.	2880
CL3300Contig4	DPOLA_XENLA	DPOLA_HUMAN	DNA polymerase alpha catalytic subunit (EC 2.7.7.7) (DNA polymerase alpha catalytic subunit p180)	2.08	7.1	860	200	0.74	14	18.9715	Ambiguous		166.62	165.061	165.913		D.C.	4491
CL11723Contig1	DAAF3_XENLA	DAAF3_HUMAN	Dynein assembly factor 3, axonemal	-0.88	40	5.3	37	0.74	2.7	3.63805	Ambiguous		55.082	87.984	59.411		D.C.	818
CL10986Contig1	RM15_XENLA	RM15_HUMAN	39S ribosomal protein L15, mitochondrial (L15mt) (MRP-L15)				220	0.73	16	21.5631	Ambiguous		33.409	155.084	33.42	MT	D.C.	543
CL2159Contig2	Q52KT7_XENLA	DJC13_HUMAN	DnaJ homolog subfamily C member 13 (Required for receptor-mediated endocytosis 8) (RME-8)	-3	5.8	0	2.8	0.73	0.2	0.277488	Ambiguous		255.19	31.366	254.415		D.C.	3139
CL4692Contig3	Q5XGN6_XENLA	CHSP1_HUMAN	Calcium-regulated heat stable protein 1 (Calcium-regulated heat-stable protein of 24 kDa) (CRHSP-24)	-0.34	530	240	1600	0.72	120	159.316	Ambiguous		16.638	16.511	15.892		D.C.	5856
CL1688Contig4	PP1B_XENLA	PP1B_HUMAN	Serine/threonine-protein phosphatase PP1-beta catalytic subunit (PP-1B) (PPP1CD) (EC 3.1.3.16) (EC 3.1.3.53)	0.12	80	110	1200	0.72	85	117.117	Ambiguous		37.172	37.173	37.187		D.C.	2084
CL15312Contig1	Q3B8C9_XENLA	RT30_HUMAN	28S ribosomal protein S30, mitochondrial (MRP-S30) (S30mt) (Programmed cell death protein 9)				110	0.72	7.8	10.9349	Ambiguous		47.458	47.372	50.365		D.C.	1809
CL7572Contig1	Q32NK8_XENLA	NELFB_HUMAN	Negative elongation factor B (NELF-B) (Cofactor of BRCA1)	2.68	0.5	250	34	0.72	2.4	3.38146	Ambiguous		65.711	65.698	65.697		D.C.	7717
CL154Contig13	Q7ZWX1_XENLA	SRSF6_HUMAN	Serine/arginine-rich splicing factor 6 (Pre-mRNA-splicing factor SRP55) (Splicing factor, arginine/serine-rich 6)	2.81	0.7	490	11	0.72	0.8	1.11055	Ambiguous		51.583	76.935	39.587		D.C.	1849
CL2434Contig5	F6ZWT4_XENTR	SYNJ1_HUMAN	Synaptojanin-1 (EC 3.1.3.36) (Synaptic inositol 1,4,5-trisphosphate 5-phosphatase 1)	-1.23	3.4	0.2	8.1	0.72	0.58	0.808471	Ambiguous		167.32	66.957	173.103		D.C.	3487
CL329Contig6	B1WBA6_XENLA	IF4G1_HUMAN	Eukaryotic translation initiation factor 4 gamma 1 (eIF-4-gamma 1) (eIF-4G 1) (eIF-4G1) (p220)	-2.47	330	1.1	2700	0.71	99	139.778	Ambiguous		178.02	77.982	175.491		D.C.	4484
CL49Contig17	Q6PA55_XENLA	E41L3_HUMAN	Band 4.1-like protein 3 (4.1B) (Differentially expressed in adenocarcinoma of the lung protein 1) (DAL-1) [Cleaved into: Band 4.1-like protein 3, N-terminally processed]	-3	1	0	17	0.71	1.2	1.65718	Ambiguous		92.579	84.163	120.678		D.C.	6096
dsrrswapns_comp206776_c0_seq1	F6W448_XENTR	IFT88_HUMAN	Intraflagellar transport protein 88 homolog (Recessive polycystic kidney disease protein Tg737 homolog) (Tetratricopeptide repeat protein 10) (TPR repeat protein 10)	-1.8	9.3	0.1	15	0.7	1.1	1.51666	Ambiguous		93.302		94.27		D.C.	6825
CL3450Contig1	Q6NRS4_XENLA	SNX1_HUMAN	Sorting nexin-1	-2.05	280	2.5	390	0.69	28	41.0763	Ambiguous		57.661	58.599	59.07		D.C.	4635
CL484Contig4	F7B605_XENTR	ANR28_HUMAN	Serine/threonine-protein phosphatase 6 regulatory ankyrin repeat subunit A (PP6-ARS-A) (Serine/threonine-protein phosphatase 6 regulatory subunit ARS-A) (Ankyrin repeat domain-containing protein 28) (Phosphatase interactor targeting protein hnRNP K) (PITK)	-3	23	0	140	0.69	10	14.9019	Ambiguous		113.51	74.962	112.966		D.C.	5981
dsrrswapns_comp198132_c0_seq2	MGN_XENLA	MGN_HUMAN	Protein mago nashi homolog	1.57	13	490	140	0.69	10	14.6415	Ambiguous		22.304	17.078	17.164		D.C.	9067
CL57Contig6	TBB4_XENLA	TBB4B_HUMAN	Tubulin beta-4B chain (Tubulin beta-2 chain) (Tubulin beta-2C chain)	-1.06	10000	900	65	0.68	8400	12408.3	Ambiguous	BioGrid	49.815	49.816	49.831		D.C.	6698
CL1951Contig4	B1H1Q2_XENLA	GRSF1_HUMAN	G-rich sequence factor 1 (GRSF-1)				300	0.68	22	32.1295	Ambiguous		39.125	39.102	53.126	MT	D.C.	2568
CL4343Contig1	Q6DE98_XENLA	GLYG_HUMAN	Glycogenin-1 (GN-1) (GN1) (EC 2.4.1.186)	-1.42	1500	59	2900	0.67	210	309.695	Ambiguous		37.384	37.384	39.384		D.C.	5577
CL6507Contig2	TDRD7_XENLA	TDRD7_HUMAN	Tudor domain-containing protein 7 (PCTAIRE2-binding protein) (Tudor repeat associator with PCTAIRE-2) (Trap)	-0.68	8.8	1.8	13	0.67	0.96	1.4196	Ambiguous		122.23	120.959	123.586		D.C.	7155
CL598Contig6	A8WH45_XENLA	NIPS1_HUMAN	Protein NipSnap homolog 1 (NipSnap1)				180	0.66	13	20.1145	Ambiguous		33.064	33.065	33.31		D.C.	6822
CL7616Contig1	Q7ZTR4_XENLA	ORC3_HUMAN	Origin recognition complex subunit 3 (Origin recognition complex subunit Latheo)	-0.16	39	27	48	0.66	3.4	5.17344	Ambiguous		81.032	81.033	82.254		D.C.	7746
zeinaSSns_comp383256_c9_seq1	F6SCF9_XENTR	STK31_HUMAN	Serine/threonine-protein kinase 31 (EC 2.7.11.1) (Serine/threonine-protein kinase NYD-SPK) (Sugen kinase 396) (SgK396)	-3	92	0	40	0.65	2.9	4.37207	Ambiguous		10.663		115.694		D.C.	10953
CL6521Contig1	Q5XGK2_XENLA	BTF3_HUMAN	Transcription factor BTF3 (Nascent polypeptide-associated complex subunit beta) (NAC-beta) (RNA polymerase B transcription factor 3)	-1.44	1500	55	2200	0.64	160	241.839	Ambiguous		23.736	17.718	22.168		D.C.	7165
CL788Contig3	RBP4A_XENLA	RBBP4_HUMAN	Histone-binding protein RBBP4 (Chromatin assembly factor 1 subunit C) (CAF-1 subunit C) (Chromatin assembly factor I p48 subunit) (CAF-I 48 kDa subunit) (CAF-I p48) (Nucleosome-remodeling factor subunit RBAP48) (Retinoblastoma-binding protein 4) (RBBP-4) (Retinoblastoma-binding protein p48)	1.79	12	740	680	0.64	48	75.1437	Ambiguous		47.596	47.569	47.656		D.C.	7879
CL9692Contig1	Q6GQJ3_XENLA	EXOS9_HUMAN	Exosome complex component RRP45 (Autoantigen PM/Scl 1) (Exosome component 9) (P75 polymyositis-scleroderma overlap syndrome-associated autoantigen) (Polymyositis/scleroderma autoantigen 1) (Polymyositis/scleroderma autoantigen 75 kDa) (PM/Scl-75)	0.64	65	280	280	0.64	20	31.3648	Ambiguous		48.032	48.033	48.949		D.C.	8692
zeinaSSns_comp388999_c1_seq1	BAG6B_XENLA	BAG6_HUMAN	Large proline-rich protein BAG6 (BAG family molecular chaperone regulator 6) (BCL2-associated athanogene 6) (BAG-6) (BAG6) (HLA-B-associated transcript 3) (Protein G3) (Protein Scythe)	0.27	220	400	70	0.64	5	7.87192	Ambiguous		119.72	119.354	119.409		D.C.	11229
CL149Contig6	Q7ZWN3_XENLA	CHD4_HUMAN	Chromodomain-helicase-DNA-binding protein 4 (CHD-4) (EC 3.6.4.12) (ATP-dependent helicase CHD4) (Mi-2 autoantigen 218 kDa protein) (Mi2-beta)	2.43	2.2	580	130	0.63	9.2	14.6645	Ambiguous		214.81	214.688	218.005		D.C.	1730
CL3257Contig1	Q8JG65_XENLA	PI3R4_HUMAN	Phosphoinositide 3-kinase regulatory subunit 4 (PI3-kinase regulatory subunit 4) (EC 2.7.11.1) (PI3-kinase p150 subunit) (Phosphoinositide 3-kinase adaptor protein)	-3	9	0	15	0.63	1.1	1.71489	Ambiguous		153.6	35.702	153.103		D.C.	4447
CL61Contig2	RUXF_XENLA	RUXF_HUMAN	Small nuclear ribonucleoprotein F (snRNP-F) (Sm protein F) (Sm-F) (SmF)	-0.57	870	230	97	0.62	7	11.2844	Ambiguous		9.7251	9.725	9.725		D.C.	6963
CL1820Contig2	A2VCZ3_XENTR	SVIL_HUMAN	Supervillin (Archvillin) (p205/p250)	-0.07	17	15	30	0.62	2.1	3.42791	Ambiguous		200.78	93.143	247.746		D.C.	2315
CL1402Contig1	Q5U4V6_XENLA	TBA1C_HUMAN	Tubulin alpha-1C chain (Alpha-tubulin 6) (Tubulin alpha-6 chain)	-1.29	7100	370	32	0.61	6200	10166.1	Ambiguous		50.143	50.067	49.895		D.C.	1519
CL8379Contig1	NUD16_XENLA	NUD16_HUMAN	U8 snoRNA-decapping enzyme (EC 3.6.1.62) (IDP phosphatase) (IDPase) (EC 3.6.1.-) (Inosine diphosphate phosphatase) (Nucleoside diphosphate-linked moiety X motif 16) (Nudix motif 16) (U8 snoRNA-binding protein H29K) (m7GpppN-mRNA hydrolase)	0.26	320	590	470	0.61	600	978.445	Ambiguous		24.35	24.35	21.273		D.C.	8116
CL5605Contig1	MCES_XENLA	MCES_HUMAN	mRNA cap guanine-N7 methyltransferase (EC 2.1.1.56) (RG7MT1) (mRNA (guanine-N(7)-)-methyltransferase) (mRNA cap methyltransferase) (hCMT1) (hMet) (hcm1p)	2.98	0.7	680	110	0.6	7.7	12.8772	Ambiguous		46.003	46.003	54.844		D.C.	6556
CL3040Contig2	CING_XENLA	CING_HUMAN	Cingulin	-3	8.8	0	17	0.6	1.2	1.98274	Ambiguous		159.47	158.466	136.386		D.C.	4252
CL20610Contig1	F6S6J9_XENTR	EXC6B_HUMAN	Exocyst complex component 6B (Exocyst complex component Sec15B) (SEC15-like protein 2)	-3	5.5	0	13	0.6	0.92	1.53646	Ambiguous		70.354		94.201		D.C.	2981
CL58Contig12	DCT2A_XENLA	DCTN2_HUMAN	Dynactin subunit 2 (50 kDa dynein-associated polypeptide) (Dynactin complex 50 kDa subunit) (DCTN-50) (p50 dynamitin)	-2.93	450	0.5	1200	0.59	88	149.546	Ambiguous		44.737	44.738	44.231		D.C.	6768
CL38Contig1	Q640G9_XENLA	HCFC1_HUMAN	Host cell factor 1 (HCF) (HCF-1) (C1 factor) (CFF) (VCAF) (VP16 accessory protein) [Cleaved into: HCF N-terminal chain 1; HCF N-terminal chain 2; HCF N-terminal chain 3; HCF N-terminal chain 4; HCF N-terminal chain 5; HCF N-terminal chain 6; HCF C-terminal chain 1; HCF C-terminal chain 2; HCF C-terminal chain 3; HCF C-terminal chain 4; HCF C-terminal chain 5; HCF C-terminal chain 6]	1.61	20	790	150	0.59	11	17.8968	Ambiguous		219.06	219.067	208.732		D.C.	5113
CL22134Contig1				1.38212	37	900	76	0.59	5.4	9.16647	Ambiguous		30.588				D.C.	3212
CL2469Contig2	Q7SY90_XENLA	CATA_HUMAN	Catalase (EC 1.11.1.6)	-0.34	740	340	8.1	0.58	340	586.963	Ambiguous		60.159	60.259	59.756		D.C.	3525
CL24487Contig1	B0BMP6_XENTR	L2HDH_HUMAN	L-2-hydroxyglutarate dehydrogenase, mitochondrial (EC 1.1.99.2) (Duranin)				130	0.58	9.1	15.5681	Ambiguous		16.186		50.316	MT	D.C.	3500
CL6373Contig1	Q6DCZ1_XENLA	DPOA2_HUMAN	DNA polymerase alpha subunit B (DNA polymerase alpha 70 kDa subunit)	2.99	1	970	130	0.58	9	15.5484	Ambiguous		75.237	66.845	65.948		D.C.	7065
zeinaSSns_comp385093_c4_seq2	Q6DFT9_XENLA	TPPC5_HUMAN	Trafficking protein particle complex subunit 5	-1.5	13	0.4	57	0.58	4.1	7.03539	Ambiguous		21.011	21.011	20.783		D.C.	11002
CL200Contig3		POP1_HUMAN	Ribonucleases P/MRP protein subunit POP1 (hPOP1) (EC 3.1.26.5)	2.46	1.1	300	43	0.58	3.1	5.26099	Ambiguous		111.14		114.709		D.C.	2911
CL6725Contig1	PRKAA_XENLA	PRKRA_HUMAN	Interferon-inducible double-stranded RNA-dependent protein kinase activator A (PKR-associated protein X) (PKR-associating protein X) (Protein activator of the interferon-induced protein kinase) (Protein kinase, interferon-inducible double-stranded RNA-dependent activator)	-1.71	1100	22	120	0.57	200	354.312	Ambiguous		34.07	34.07	34.404		D.C.	7283
CL7105Contig1	Q5U4L3_XENLA	RM09_HUMAN	39S ribosomal protein L9, mitochondrial (L9mt) (MRP-L9)				57	0.57	4.1	7.16502	Ambiguous		28.154	28.175	30.243	MT	D.C.	7514
zeinaSSns_comp387195_c0_seq1	Q8AVT9_XENLA	ARC1A_HUMAN	Actin-related protein 2/3 complex subunit 1A (SOP2-like protein)	-2.06	510	4.5	1900	0.55	140	249.789	Ambiguous		41.563	41.572	41.569		D.C.	11083
CL3226Contig2	Q5U561_XENLA	SF3A3_HUMAN	Splicing factor 3A subunit 3 (SF3a60) (Spliceosome-associated protein 61) (SAP 61)	2.1	2.8	350	190	0.55	13	24.1607	Ambiguous		60.221	58.754	58.849		D.C.	4417
dsrrswapns_comp186652_c0_seq2	Q7SZ05_XENLA	RM44_HUMAN	39S ribosomal protein L44, mitochondrial (L44mt) (MRP-L44) (EC 3.1.26.-)				160	0.55	11	20.865	Ambiguous		10.639	36.152	37.535	MT	D.C.	9031
CL927Contig3	D0UED5_XENLA	DICER_HUMAN	Endoribonuclease Dicer (EC 3.1.26.3) (Helicase with RNase motif) (Helicase MOI)	-3	11	0	15	0.55	1	1.88553	Ambiguous		214.97	204.602	218.682		D.C.	8524
CL5069Contig1	Q6DE41_XENLA	RM01_HUMAN	39S ribosomal protein L1, mitochondrial (L1mt) (MRP-L1)				160	0.54	12	21.6003	Ambiguous		38.687	37.839	36.909	MT	D.C.	6155
CL5886Contig1	Q6DE29_XENLA	SNX6_HUMAN	Sorting nexin-6 (TRAF4-associated factor 2) [Cleaved into: Sorting nexin-6, N-terminally processed]	-3	10	0	36	0.54	2.6	4.70026	Ambiguous		46.833	46.703	46.649		D.C.	6751
CL5749Contig1	Q6PBB7_XENLA	ETFB_HUMAN	Electron transfer flavoprotein subunit beta (Beta-ETF)	-0.26	10	5.6	3200	0.53	460	866.139	Ambiguous		27.629	27.514	27.844		D.C.	6648
CL2615Contig2	Q68EY5_XENLA	ATPA_HUMAN	ATP synthase subunit alpha, mitochondrial				28	0.53	66	124.94	Ambiguous		64.785	59.888	59.751	MT	D.C.	3764
CL432Contig1	RO21_XENLA	ROA2_HUMAN	Heterogeneous nuclear ribonucleoproteins A2/B1 (hnRNP A2/B1)	1.63	19	830	120	0.53	8.2	15.4455	Ambiguous		34.479	36.559	37.43		D.C.	5565
TC464645	B7ZR98_XENLA	NUCL_HUMAN	Nucleolin (Protein C23)	1.8	50	3100	39	0.52	200	379.62	Ambiguous		75.433	75.42	76.614		D.C.	1507
TC420045	Q6DJH8_XENLA	ACTZ_HUMAN	Alpha-centractin (Centractin) (ARP1) (Actin-RPV) (Centrosome-associated actin homolog)	-1.65	500	11	1900	0.52	130	254.985	Ambiguous		43.025	42.64	42.614		D.C.	10429
CL18758Contig1				-1.02051	20	1.9	17	0.52	1.2	2.33544	Ambiguous		36.22				D.C.	2421
CL2211Contig3	Q5XHJ8_XENLA	GELS_HUMAN	Gelsolin (AGEL) (Actin-depolymerizing factor) (ADF) (Brevin)	-2.45	3300	12	62	0.51	860	1669.76	Ambiguous		80.703	80.497	85.698		D.C.	3211
CL814Contig4	Q6GNA3_XENLA	2AAA_HUMAN	Serine/threonine-protein phosphatase 2A 65 kDa regulatory subunit A alpha isoform (Medium tumor antigen-associated 61 kDa protein) (PP2A subunit A isoform PR65-alpha) (PP2A subunit A isoform R1-alpha)	-0.82	1200	190	25	0.51	300	581.981	Ambiguous		66.312	65.389	65.309		D.C.	8012
CL1743Contig3	Q7ZTR3_XENLA	PP1A_HUMAN	Serine/threonine-protein phosphatase PP1-alpha catalytic subunit (PP-1A) (EC 3.1.3.16)	-0.15	360	260	2500	0.51	180	352.626	Ambiguous	BioGrid	37.197	37.198	37.512		D.C.	2194
CL4257Contig2	A1DPK7_XENLA	ARPC3_HUMAN	Actin-related protein 2/3 complex subunit 3 (Arp2/3 complex 21 kDa subunit) (p21-ARC)	-2.47	480	1.6	540	0.51	39	75.2619	Ambiguous		20.656	20.656	20.547		D.C.	5494
CL1661Contig2	B7ZQW8_XENLA	SP16H_HUMAN	FACT complex subunit SPT16 (Chromatin-specific transcription elongation factor 140 kDa subunit) (FACT 140 kDa subunit) (FACTp140) (Facilitates chromatin transcription complex subunit SPT16) (hSPT16)	2.37	5.9	1400	480	0.51	34	66.709	Ambiguous		118.44	118.44	119.914		D.C.	2046
zeinaSSns_comp385277_c0_seq4	B0BMQ2_XENTR	PUF60_HUMAN	Poly(U)-binding-splicing factor PUF60 (60 kDa poly(U)-binding-splicing factor) (FUSE-binding protein-interacting repressor) (FBP-interacting repressor) (Ro-binding protein 1) (RoBP1) (Siah-binding protein 1) (Siah-BP1)	1.04	47	510	110	0.51	16	31.477	Ambiguous		55.529	69.818	59.875		D.C.	11010
dsrrswapns_comp210125_c2_seq5	Q6DCR4_XENLA	RBP56_HUMAN	TATA-binding protein-associated factor 2N (68 kDa TATA-binding protein-associated factor) (TAF(II)68) (TAFII68) (RNA-binding protein 56)	1.76	16	940	120	0.51	8.6	16.7468	Ambiguous		48.867	51.096	61.83		D.C.	9256
CL5537Contig1	CJ076_XENLA	CJ076_HUMAN	UPF0668 protein C10orf76				11	0.51	0.79	1.56336	Ambiguous		79.035	79.036	78.71	TM	D.C.	6519
CL1362Contig1	Q8AVN8_XENLA	CDC37_HUMAN	Hsp90 co-chaperone Cdc37 (Hsp90 chaperone protein kinase-targeting subunit) (p50Cdc37) [Cleaved into: Hsp90 co-chaperone Cdc37, N-terminally processed]	-0.84	630	90	280	0.5	210	417.372	Ambiguous		43.485	43.486	44.468		D.C.	1410
CL2896Contig1	Q6PAB4_XENLA	CB39L_HUMAN	Calcium-binding protein 39-like (Antigen MLAA-34) (MO25beta) (Mo25-like protein)	-0.08	110	90	280	0.5	20	40.5293	Ambiguous		39.285	39.183	39.088		D.C.	4085
CL4096Contig1	Q52KV1_XENLA	CATD_HUMAN	Cathepsin D (EC 3.4.23.5) [Cleaved into: Cathepsin D light chain; Cathepsin D heavy chain]				90	0.5	6.4	12.7574	Ambiguous		43.409	43.396	44.552	ER	D.C.	5351
CL5097Contig2	Q9DDL0_XENLA	DC1L1_HUMAN	Cytoplasmic dynein 1 light intermediate chain 1 (LIC1) (Dynein light chain A) (DLC-A) (Dynein light intermediate chain 1, cytosolic)	-3	310	0	1100	0.49	78	158.848	Ambiguous		56.064	56.065	56.579		D.C.	6180
CL57Contig13	TBB2_XENLA	TBB2B_HUMAN	Tubulin beta-2B chain	-2.18	410	2.7	200	0.49	15	29.5754	Ambiguous		49.723	49.724	49.953		D.C.	6692
CL12932Contig1	Q3KQE8_XENLA	RM10_HUMAN	39S ribosomal protein L10, mitochondrial (L10mt) (MRP-L10) (39S ribosomal protein L8, mitochondrial) (L8mt) (MRP-L8)				47	0.49	3.3	6.81006	Ambiguous		27.75	27.491	29.283	MT	D.C.	1197
zeinaSSns_comp385449_c1_seq1	MECR_XENTR	MECR_HUMAN	Trans-2-enoyl-CoA reductase, mitochondrial (EC 1.3.1.38) (Nuclear receptor-binding factor 1) (HsNrbf-1) (NRBF-1)				89	0.48	44	90.8888	Ambiguous		38.799	48.644	40.462	MT	D.C.	9439
CL3349Contig2	A2VD60_XENLA	LTN1_HUMAN	E3 ubiquitin-protein ligase listerin (EC 6.3.2.-) (RING finger protein 160) (Zinc finger protein 294)	-2.16	16	0.1	1	0.48	0.074	0.153795	Ambiguous		200.27	87.396	200.552		D.C.	4530
CL207Contig1	Q6IRD3_XENLA	2ABA_HUMAN	Serine/threonine-protein phosphatase 2A 55 kDa regulatory subunit B alpha isoform (PP2A subunit B isoform B55-alpha) (PP2A subunit B isoform PR55-alpha) (PP2A subunit B isoform R2-alpha) (PP2A subunit B isoform alpha)	-3	480	0	15	0.47	180	373.773	Ambiguous	Thakar	51.54	51.541	51.692		D.C.	3004
CL207Contig6	2ABD_XENLA	2ABD_HUMAN	Serine/threonine-protein phosphatase 2A 55 kDa regulatory subunit B delta isoform (PP2A subunit B isoform B55-delta) (PP2A subunit B isoform PR55-delta) (PP2A subunit B isoform R2-delta) (PP2A subunit B isoform delta)	-2.46	220	0.7	140	0.47	61	129.068	Ambiguous		51.751	51.72	52.042		D.C.	3006
CL9147Contig2	Q5I0C0_XENTR	HEAT3_HUMAN	HEAT repeat-containing protein 3	0.73	25	130	27	0.47	2	4.14887	Ambiguous		74.161		74.583		D.C.	8461
CL2176Contig2	B7ZQF8_XENLA	PRCC_HUMAN	Proline-rich protein PRCC (Papillary renal cell carcinoma translocation-associated gene protein)	3	0	300	7.3	0.47	0.52	1.11534	Ambiguous		88.612	62.865	52.418		D.C.	3161
TC439103	CIRBB_XENLA	CIRBP_HUMAN	Cold-inducible RNA-binding protein (A18 hnRNP) (Glycine-rich RNA-binding protein CIRP)	0.22	1800	2900	44	0.46	820	1796.05	Ambiguous		17.855	17.855	18.648		D.C.	10574
CL13000Contig1	Q2TAT4_XENLA	IFT22_HUMAN	Intraflagellar transport protein 22 homolog (Rab-like protein 5)	-0.67	32	6.8	63	0.46	4.5	9.79328	Ambiguous		20.682	12.546	20.835		D.C.	1220
CL13258Contig2	F6YQX0_XENTR	EXOC2_HUMAN	Exocyst complex component 2 (Exocyst complex component Sec5)	-3	4.7	0	14	0.46	0.99	2.17399	Ambiguous		103.7		104.066		D.C.	1295
CL1221Contig1	Q9PWG8_XENLA	COR1C_HUMAN	Coronin-1C (Coronin-3) (hCRNN4)	-2.68	410	0.9	100	0.45	200	452.544	Ambiguous		53.805	131.176	53.249		D.C.	994
DY567732	H4_XENLA	H4_HUMAN	Histone H4	1.57	230	8500	3.2	0.45	93	205.703	Ambiguous		11.093	11.367	11.367		D.C.	2735
CL3414Contig1	Q92140_XENLA	PP2AB_HUMAN	Serine/threonine-protein phosphatase 2A catalytic subunit beta isoform (PP2A-beta) (EC 3.1.3.16)	-1.01	660	65	26	0.44	96	218.392	Ambiguous		35.578	35.578	35.575		D.C.	4605
CL150Contig3	UB10B_XENLA	UBP10_HUMAN	Ubiquitin carboxyl-terminal hydrolase 10 (EC 3.4.19.12) (Deubiquitinating enzyme 10) (Ubiquitin thioesterase 10) (Ubiquitin-specific-processing protease 10)	-3	280	0.1	310	0.44	22	50.1898	Ambiguous		90.793	89.197	87.134		D.C.	1760
CL2098Contig6	Q6GM92_XENLA	MST4_HUMAN	Serine/threonine-protein kinase 26 (EC 2.7.11.1) (MST3 and SOK1-related kinase) (Mammalian STE20-like protein kinase 4) (MST-4) (STE20-like kinase MST4) (Serine/threonine-protein kinase MASK)	-0.99	60	6.2	130	0.44	9.6	21.7738	Ambiguous		46.596	46.597	46.529		D.C.	3040
CL11143Contig1	F6QPY8_XENTR	CRNL1_HUMAN	Crooked neck-like protein 1 (Crooked neck homolog) (hCrn)	3	0.3	630	89	0.44	6.3	14.2802	Ambiguous		83.15	33.485	100.452		D.C.	602
CL6506Contig2	K1468_XENTR	K1468_HUMAN	LisH domain and HEAT repeat-containing protein KIAA1468	-3	22	0	31	0.44	2.2	5.1454	Ambiguous		135.04		134.63		D.C.	7154
CL4254Contig1	Q5U5A4_XENLA	TBB3_HUMAN	Tubulin beta-3 chain (Tubulin beta-4 chain) (Tubulin beta-III)	-1.61	89	2.2	29	0.44	2.1	4.78758	Ambiguous		51.054	50.342	50.433		D.C.	5490
CL7822Contig1	Q5PPV1_XENLA	ALKB3_HUMAN	Alpha-ketoglutarate-dependent dioxygenase alkB homolog 3 (EC 1.14.11.-) (Alkylated DNA repair protein alkB homolog 3) (DEPC-1) (Prostate cancer antigen 1)	0.08	35	42	23	0.44	1.7	3.8141	Ambiguous		34.582	32.363	33.375		D.C.	7859
CL1400Contig2	TPC13_XENLA	TPC13_HUMAN	Trafficking protein particle complex subunit 13	-0.72	8.4	1.6	11	0.44	0.82	1.84957	Ambiguous		46.413	46.301	46.524		D.C.	1515
CL5224Contig1	Q5XGY6_XENLA	FHOD3_HUMAN	FH1/FH2 domain-containing protein 3 (Formactin-2) (Formin homolog overexpressed in spleen 2) (hFHOS2)	-3	3.9	0	8.9	0.44	0.64	1.43303	Ambiguous		148.84	148.508	158.613		D.C.	6276
CL8557Contig1	Q6DDU3_XENLA	EXOS7_HUMAN	Exosome complex component RRP42 (Exosome component 7) (Ribosomal RNA-processing protein 42) (p8)	0.71	77	390	260	0.43	18	42.9736	Ambiguous		31.944	31.944	31.821		D.C.	8195
CL326Contig10	Q642S4_XENLA	GOGA2_HUMAN	Golgin subfamily A member 2 (130 kDa cis-Golgi matrix protein) (GM130) (GM130 autoantigen) (Golgin-95)	-1.63	5.1	0.1	12	0.43	0.83	1.95086	Ambiguous		111.63	111.5	113.086		D.C.	4459
zeinaSSns_comp386758_c0_seq2	Q32NK4_XENLA	TRM6_HUMAN	tRNA (adenine(58)-N(1))-methyltransferase non-catalytic subunit TRM6 (tRNA(m1A58)-methyltransferase subunit TRM6) (tRNA(m1A58)MTase subunit TRM6)	2	8.9	880	9.9	0.43	0.71	1.64984	Ambiguous		53.792	53.619	55.799		D.C.	11069
CL146Contig4	HNDLA_XENLA	HNRDL_HUMAN	Heterogeneous nuclear ribonucleoprotein D-like (hnRNP D-like) (hnRNP DL) (AU-rich element RNA-binding factor) (JKT41-binding protein) (Protein laAUF1)	1.02	170	1800	70	0.42	74	174.43	Ambiguous		32.613	32.614	46.438		D.C.	1656
CL26361Contig1	Q6DIK1_XENTR	PPIL3_HUMAN	Peptidyl-prolyl cis-trans isomerase-like 3 (PPIase) (EC 5.2.1.8) (Cyclophilin J) (CyPJ) (Cyclophilin-like protein PPIL3) (Rotamase PPIL3)	0.29	110	220	310	0.42	22	53.6346	Ambiguous		18.104	59.229	18.155		D.C.	3799
CL1203Contig1	Q9PUN0_XENLA	MTA2_HUMAN	Metastasis-associated protein MTA2 (Metastasis-associated 1-like 1) (MTA1-L1 protein) (p53 target protein in deacetylase complex)	2.29	5.6	1100	300	0.42	22	51.3085	Ambiguous		77.016	191.528	75.023		D.C.	940
CL455Contig2	Q5PPY0_XENLA	EXOS8_HUMAN	Exosome complex component RRP43 (Exosome component 8) (Opa-interacting protein 2) (OIP-2) (Ribosomal RNA-processing protein 43) (p9)	0.47	71	210	140	0.42	9.7	22.8852	Ambiguous		29.951	29.951	30.04		D.C.	5742
CL8507Contig1	F6Z4A8_XENTR	LONM_HUMAN	Lon protease homolog, mitochondrial (EC 3.4.21.-) (LONHs) (Lon protease-like protein) (LONP) (Mitochondrial ATP-dependent protease Lon) (Serine protease 15)				29	0.42	2.1	4.89409	Ambiguous		108.43	94.572	106.489	MT	D.C.	8170
CL7583Contig1	CTF18_XENLA	CTF18_HUMAN	Chromosome transmission fidelity protein 18 homolog (hCTF18) (CHL12)	2.8	0.6	380	20	0.42	1.4	3.35269	Ambiguous		113.32	113.222	107.383		D.C.	7722
CL422Contig6	MYOF_XENTR	MYOF_HUMAN	Myoferlin (Fer-1-like protein 3)				10	0.42	0.73	1.76149	Ambiguous		235.12		234.709	TM	D.C.	5477
CL541Contig2	EF1A1_XENLA	EF1A2_HUMAN	Elongation factor 1-alpha 2 (EF-1-alpha-2) (Eukaryotic elongation factor 1 A-2) (eEF1A-2) (Statin-S1)	-1.27	1200	65	150	0.41	5000	12266	Ambiguous		50.808	50.678	50.47		D.C.	6425
CL6221Contig1	Q66IX3_XENLA	RBPS2_HUMAN	RNA-binding protein with multiple splicing 2	0.09	320	390	180	0.41	13	31.9611	Ambiguous		21.692	21.693	22.497		D.C.	6973
zeinaSSns_comp389612_c3_seq1	RO32_XENLA	ROA3_HUMAN	Heterogeneous nuclear ribonucleoprotein A3 (hnRNP A3)	1.54	26	900	180	0.41	13	31.0319	Ambiguous		49.615	39.437	39.595		D.C.	11302
CL7954Contig1	KIF4_XENLA	KIF4A_HUMAN	Chromosome-associated kinesin KIF4A (Chromokinesin-A)	1.72	5	260	21	0.41	1.5	3.75316	Ambiguous		138.92	138.924	139.881		D.C.	7918
dsrrswapns_comp216662_c5_seq6	Q6GQB6_XENLA	G3BP1_HUMAN	Ras GTPase-activating protein-binding protein 1 (G3BP-1) (EC 3.6.4.12) (EC 3.6.4.13) (ATP-dependent DNA helicase VIII) (hDH VIII) (GAP SH3 domain-binding protein 1)	-2.28	540	2.8	290	0.4	21	52.1999	Ambiguous		55.211	52.651	52.164		D.C.	9731
CL1190Contig1	Q6INV1_XENLA	PPM1B_HUMAN	Protein phosphatase 1B (EC 3.1.3.16) (Protein phosphatase 2C isoform beta) (PP2C-beta)	-0.14	90	65	180	0.4	13	31.8226	Ambiguous		50.438	791.11	52.643		D.C.	888
zeinaSSns_comp384291_c0_seq1	CHM2A_XENLA	CHM2A_HUMAN	Charged multivesicular body protein 2a (Chromatin-modifying protein 2a) (CHMP2a) (Putative breast adenocarcinoma marker BC-2) (Vacuolar protein sorting-associated protein 2-1) (Vps2-1) (hVps2-1)	0.18	40	61	49	0.4	3.5	8.70292	Ambiguous		25.015	25.015	25.104		D.C.	10974
CL3850Contig1	Q6PA60_XENLA	AAKG2_HUMAN	5'-AMP-activated protein kinase subunit gamma-2 (AMPK gamma2) (AMPK subunit gamma-2) (H91620p)	-0.56	34	9.3	4.5	0.4	0.32	0.798176	Ambiguous		62.548	62.522	63.066		D.C.	5060
CL201Contig6	LIS1_XENLA	LIS1_HUMAN	Platelet-activating factor acetylhydrolase IB subunit alpha (Lissencephaly-1 protein) (LIS-1) (PAF acetylhydrolase 45 kDa subunit) (PAF-AH 45 kDa subunit) (PAF-AH alpha) (PAFAH alpha)	-0.69	410	84	1300	0.39	91	233.618	Ambiguous		46.777	46.762	46.638		D.C.	2930
dsrrswapns_comp215482_c1_seq26	A4IGT9_XENTR	ARHG1_HUMAN	Rho guanine nucleotide exchange factor 1 (115 kDa guanine nucleotide exchange factor) (p115-RhoGEF) (p115RhoGEF) (Sub1.5)	-3	5.4	0	9.6	0.39	0.69	1.74052	Ambiguous		114.3	161.861	102.435		D.C.	9622
zeinaSSns_comp387831_c0_seq1	MAEA_XENLA	MAEA_HUMAN	Macrophage erythroblast attacher (Cell proliferation-inducing gene 5 protein) (Erythroblast macrophage protein) (Human lung cancer oncogene 10 protein) (HLC-10)	0.98	1.5	14	7.8	0.39	0.56	1.44689	Ambiguous		45.451	45.481	45.287		D.C.	4046
dsrrswapns_comp211683_c11_seq2	B1H3F2_XENTR	PFD2_HUMAN	Prefoldin subunit 2	-1.25	480	27	280	0.38	20	53.1929	Ambiguous		17.467		16.648		D.C.	9339
CL6103Contig1	DNA2_XENLA	DNA2_HUMAN	DNA replication ATP-dependent helicase/nuclease DNA2 (hDNA2) (DNA replication ATP-dependent helicase-like homolog) [Includes: DNA replication nuclease DNA2 (EC 3.1.-.-); DNA replication ATP-dependent helicase DNA2 (EC 3.6.4.12)]	0.18	120	180	150	0.38	11	28.6784	Ambiguous		119.73	119.732	120.415		D.C.	6904
CL76Contig10	Q7ZYU2_XENLA	ROA0_HUMAN	Heterogeneous nuclear ribonucleoprotein A0 (hnRNP A0)	1.51	25	810	110	0.38	7.5	19.7705	Ambiguous		32.157	32.157	30.841		D.C.	7793
CL525Contig2	Q6GN87_XENLA	VAT1_HUMAN	Synaptic vesicle membrane protein VAT-1 homolog (EC 1.-.-.-)	-3	400	0	17	0.38	1.7	4.48294	Ambiguous		52.879	48.644	41.92		D.C.	6306
CL986Contig2	Q6NU93_XENLA	DC1I2_HUMAN	Cytoplasmic dynein 1 intermediate chain 2 (Cytoplasmic dynein intermediate chain 2) (Dynein intermediate chain 2, cytosolic) (DH IC-2)	-3	460	0.5	53	0.37	100	271.699	Ambiguous		71.018	71.019	71.457		D.C.	8770
CL5711Contig1	B1WBD2_XENLA	DD19A_HUMAN	ATP-dependent RNA helicase DDX19A (EC 3.6.4.13) (DDX19-like protein) (DEAD box protein 19A)	0.06	95	110	34	0.37	31	82.0909	Ambiguous	BioGrid	54.544	54.545	53.975		D.C.	6623
CL2677Contig3	Q6GQ98_XENLA	CACP_HUMAN	Carnitine O-acetyltransferase (Carnitine acetylase) (EC 2.3.1.7) (Carnitine acetyltransferase) (CAT) (CrAT)	0.31	0.9	1.8	53	0.37	27	73.2201	Ambiguous		70.425	68.881	70.858		D.C.	3845
CL126Contig5	Q6GM69_XENLA	ROAA_HUMAN	Heterogeneous nuclear ribonucleoprotein A/B (hnRNP A/B) (APOBEC1-binding protein 1) (ABBP-1)	1.68	26	1200	300	0.37	21	57.2177	Ambiguous		35.937	35.938	36.225		D.C.	1137
CL628Contig1	Q642P5_XENLA	ODB2_HUMAN	Lipoamide acyltransferase component of branched-chain alpha-keto acid dehydrogenase complex, mitochondrial (EC 2.3.1.168) (52 kDa mitochondrial autoantigen of primary biliary cirrhosis) (Branched chain 2-oxo-acid dehydrogenase complex component E2) (BCOADC-E2) (Branched-chain alpha-keto acid dehydrogenase complex component E2) (BCKAD-E2) (BCKADE2) (Dihydrolipoamide acetyltransferase component of …				47	0.37	3.3	8.93578	Ambiguous		53.83	53.702	53.487	MT	D.C.	6999
CL10354Contig1	Q6NRC0_XENLA	RASF2_HUMAN	Ras association domain-containing protein 2	-1.01	20	2	30	0.37	2.2	5.891	Ambiguous		37.414	132.911	37.79		D.C.	325
CL2013Contig1	PP4R3_XENLA	P4R3A_HUMAN	Serine/threonine-protein phosphatase 4 regulatory subunit 3A (SMEK homolog 1)	3	0	220	24	0.37	1.7	4.72549	Ambiguous		107.03	94.201	95.368		D.C.	2922
dsrrswapns_comp215050_c0_seq5	Q6DD11_XENLA	FERM2_HUMAN	Fermitin family homolog 2 (Kindlin-2) (Mitogen-inducible gene 2 protein) (MIG-2) (Pleckstrin homology domain-containing family C member 1) (PH domain-containing family C member 1)	-3	2.5	0	5.3	0.37	0.38	1.03174	Ambiguous	BioGrid	78.837	78.88	77.861		D.C.	4205
zeinaSSns_comp354368_c0_seq1	B4_XENLA	H1FOO_HUMAN	Histone H1oo (Oocyte-specific histone H1) (Oocyte-specific linker histone H1) (osH1)	0.3	1100	2100	1200	0.36	88	244.442	Ambiguous		27.997	24.761	35.813		D.C.	586
CL365Contig8	BAZ1A_XENLA	BAZ1A_HUMAN	Bromodomain adjacent to zinc finger domain protein 1A (ATP-dependent chromatin-remodeling protein) (ATP-utilizing chromatin assembly and remodeling factor 1) (hACF1) (CHRAC subunit ACF1) (Williams syndrome transcription factor-related chromatin-remodeling factor 180) (WCRF180) (hWALp1)	2.17	2.6	380	47	0.36	3.4	9.31006	Ambiguous		179.81	70.209	178.702		D.C.	4868
CL462Contig1	Q6DFB6_XENLA	CLIP1_HUMAN	CAP-Gly domain-containing linker protein 1 (Cytoplasmic linker protein 1) (Cytoplasmic linker protein 170 alpha-2) (CLIP-170) (Reed-Sternberg intermediate filament-associated protein) (Restin)	-2.5	31	0.1	30	0.36	2.1	5.94145	Ambiguous		159.09	160.864	162.246		D.C.	5802
CL3632Contig1	ATR_XENLA	ATR_HUMAN	Serine/threonine-protein kinase ATR (EC 2.7.11.1) (Ataxia telangiectasia and Rad3-related protein) (FRAP-related protein 1)	1.07	3.6	42	4	0.36	0.28	0.791541	Ambiguous		301.54	301.459	301.367		D.C.	4836
CL14333Contig1	RM22_XENTR	RM22_HUMAN	39S ribosomal protein L22, mitochondrial (L22mt) (MRP-L22) (39S ribosomal protein L25, mitochondrial) (L25mt) (MRP-L25)				35	0.35	2.5	7.27893	Ambiguous		23.413		23.641	MT	D.C.	1591
CL1Contig1009	Q6DE71_XENLA	AAMP_HUMAN	Angio-associated migratory cell protein	0.28	110	210	280	0.34	20	58.4439	Ambiguous	Thakar	51.5	47.568	46.751		D.C.	2647
zeinaSSns_comp388185_c1_seq2	Q6DDP7_XENLA	HNRPL_HUMAN	Heterogeneous nuclear ribonucleoprotein L (hnRNP L)	1.68	16	750	31	0.34	2.2	6.46093	Ambiguous		58.812	58.685	64.133		D.C.	11155
dsrrswapns_comp104726_c0_seq1	Q6INP5_XENLA	PHLP_HUMAN	Phosducin-like protein (PHLP)	-0.55	33	9.4	26	0.34	1.8	5.40858	Ambiguous		33.464	17.723	34.282		D.C.	8984
CL866Contig8	Q640J5_XENLA	HNRH1_HUMAN	Heterogeneous nuclear ribonucleoprotein H (hnRNP H) [Cleaved into: Heterogeneous nuclear ribonucleoprotein H, N-terminally processed]	1.01	64	650	40	0.33	18	54.5771	Ambiguous		46.883	37.077	49.229		D.C.	8241
CL83Contig1	Q90ZP6_XENLA	NEB1_HUMAN	Neurabin-1 (Neurabin-I) (Neural tissue-specific F-actin-binding protein I) (Protein phosphatase 1 regulatory subunit 9A)	-0.21	10	6.4	250	0.33	18	53.6974	Ambiguous		147.42	88.07	123.342		D.C.	8127
CL8472Contig1	Q6DKB8_XENLA	DLRB1_HUMAN	Dynein light chain roadblock-type 1 (Bithoraxoid-like protein) (BLP) (Dynein light chain 2A, cytoplasmic) (Dynein-associated protein Km23) (Roadblock domain-containing protein 1)	-3	800	0.3	45	0.33	3.2	9.645	Ambiguous		10.89	10.874	10.922		D.C.	8159
CL4923Contig2	Q5XHG5_XENLA	RRP44_HUMAN	Exosome complex exonuclease RRP44 (EC 3.1.13.-) (EC 3.1.26.-) (Protein DIS3 homolog) (Ribosomal RNA-processing protein 44)	2.52	0.5	180	16	0.33	1.2	3.50253	Ambiguous	Thakar	108.46	108.462	109.003		D.C.	6029
CL4022Contig3	SMRCD_XENTR	SMRCD_HUMAN	SWI/SNF-related matrix-associated actin-dependent regulator of chromatin subfamily A containing DEAD/H box 1 (EC 3.6.4.12) (ATP-dependent helicase 1) (hHEL1)	2.5	0.6	180	11	0.33	0.78	2.39196	Ambiguous		115.13	36.422	117.402		D.C.	5282
CL8166Contig1	Q5M957_XENLA	DEOC_HUMAN	Deoxyribose-phosphate aldolase (DERA) (EC 4.1.2.4) (2-deoxy-D-ribose 5-phosphate aldolase) (Phosphodeoxyriboaldolase) (Deoxyriboaldolase)	-3	530	0	940	0.32	68	211.699	Ambiguous		35.031	35.031	35.231		D.C.	8019
CL382Contig7	CIAO1_XENTR	CIAO1_HUMAN	Probable cytosolic iron-sulfur protein assembly protein CIAO1 (WD repeat-containing protein 39)	-0.01	36	35	57	0.32	4.1	12.8194	Ambiguous		37.454	56.043	37.84		D.C.	5043
CL4008Contig1	A9UM31_XENLA	SART3_HUMAN	Squamous cell carcinoma antigen recognized by T-cells 3 (SART-3) (Tat-interacting protein of 110 kDa) (Tip110) (p110 nuclear RNA-binding protein)	3	0.1	380	490	0.31	35	112.506	Ambiguous		107.04	68.562	109.935		D.C.	5260
CL17913Contig1	Q28CB8_XENTR	NIPS2_HUMAN	Protein NipSnap homolog 2 (NipSnap2) (Glioblastoma-amplified sequence)	3	0	0.9	10	0.31	28	88.8377	Ambiguous		35.652	33.065	33.743		D.C.	2265
CL5727Contig3	HS7EA_XENLA	HSP7E_HUMAN	Heat shock 70 kDa protein 14 (HSP70-like protein 1) (Heat shock protein HSP60)	-0.68	160	32	110	0.31	7.5	24.4295	Ambiguous		57.993	54.448	54.794		D.C.	6634
CL4628Contig1	CG025_XENLA	CG025_HUMAN	UPF0415 protein C7orf25	-0.28	28	15	5.2	0.31	7	22.3844	Ambiguous		46.202	46.203	46.451		D.C.	5800
dsrrswapns_comp216531_c2_seq5	B7ZPP0_XENLA	KCC2D_HUMAN	Calcium/calmodulin-dependent protein kinase type II subunit delta (CaM kinase II subunit delta) (CaMK-II subunit delta) (EC 2.7.11.17)	-0.58	33	8.7	41	0.31	3	9.48784	Ambiguous		60.628	53.933	56.369		D.C.	3855
CL38331Contig1	ASNA_XENLA	ASNA_HUMAN	ATPase ASNA1 (EC 3.6.-.-) (Arsenical pump-driving ATPase) (Arsenite-stimulated ATPase) (Transmembrane domain recognition complex 40 kDa ATPase subunit) (hARSA-I) (hASNA-I)	-2.39	190	0.8	21	0.31	1.5	4.70027	Ambiguous		38.288	38.316	38.793		D.C.	5045
CL937Contig3	F6R3F1_XENTR	SK2L2_HUMAN	Superkiller viralicidic activity 2-like 2 (EC 3.6.4.13) (ATP-dependent RNA helicase SKIV2L2) (TRAMP-like complex helicase)	2.4	1.2	290	11	0.31	0.78	2.47769	Ambiguous		116.27		117.805		D.C.	8573
CL11680Contig1	F7E353_XENTR	SCFD2_HUMAN	Sec1 family domain-containing protein 2 (Syntaxin-binding protein 1-like 1)	0.07	35	41	14	0.3	1	3.34044	Ambiguous		73.656	37.834	75.127		D.C.	800
CL52Contig20	Q8AVE2_XENLA	HSP7C_HUMAN	Heat shock cognate 71 kDa protein (Heat shock 70 kDa protein 8) (Lipopolysaccharide-associated protein 1) (LAP-1) (LPS-associated protein 1)	0.03	5300	5700	3.4	0.29	1200	4040.97	Ambiguous	NESdbO	71.188	71.188	70.898		D.C.	6331
CL4920Contig1	Q4V7Z2_XENLA	MOES_HUMAN	Moesin (Membrane-organizing extension spike protein)	-1.89	570	7.4	75	0.29	120	401.415	Ambiguous		68.133	68.134	67.82		D.C.	6027
CL7777Contig1	Q8UVS0_XENLA	ANT3_HUMAN	Antithrombin-III (ATIII) (Serpin C1)				35	0.29	2.5	8.46411	Ambiguous		51.851	51.852	52.602	ER	D.C.	7829
TC440897	Q6NTL8_XENLA	SIR4_HUMAN	NAD-dependent protein deacetylase sirtuin-4 (EC 3.5.1.-) (NAD-dependent ADP-ribosyltransferase sirtuin-4) (EC 2.4.2.-) (Regulatory protein SIR2 homolog 4) (SIR2-like protein 4)				22	0.29	1.6	5.2973	Ambiguous		35.22	36.276	35.188	MT	D.C.	8445
CL11986Contig1	Q6INC0_XENLA	NEK3_HUMAN	Serine/threonine-protein kinase Nek3 (EC 2.7.11.1) (HSPK 36) (Never in mitosis A-related kinase 3) (NimA-related protein kinase 3)	0.23	3.6	6.1	11	0.29	0.77	2.68427	Ambiguous		55.801	18.724	57.705		D.C.	910
CL7687Contig1	SKA3_XENLA	SKA3_HUMAN	Spindle and kinetochore-associated protein 3	-3	19	0	4.2	0.29	0.3	1.02999	Ambiguous		62.718	62.718	46.359		D.C.	7786
dsrrswapns_comp204107_c0_seq1	Q3KQC0_XENLA	ATPO_HUMAN	ATP synthase subunit O, mitochondrial (Oligomycin sensitivity conferral protein) (OSCP)				43	0.28	3.1	11.1439	Ambiguous		22.976	22.86	23.277	MT	D.C.	9105
CL2916Contig1	A2RV78_XENLA	PFKAP_HUMAN	ATP-dependent 6-phosphofructokinase, platelet type (ATP-PFK) (PFK-P) (EC 2.7.1.11) (6-phosphofructokinase type C) (Phosphofructo-1-kinase isozyme C) (PFK-C) (Phosphohexokinase)	-2.72	86	0.2	34	0.28	2.5	8.6668	Ambiguous		86.64	86.641	85.596		D.C.	4106
CL11Contig15	Q6AZV1_XENLA	HS90B_HUMAN	Heat shock protein HSP 90-beta (HSP 90) (Heat shock 84 kDa) (HSP 84) (HSP84)	-0.57	5000	1300	15	0.27	1500	5650.64	Ambiguous	BioGrid	83.727	18.635	83.264		D.C.	924
CL19254Contig1	F7B1D8_XENTR	F1142_HUMAN	Protein FAM114A2	-3	49	0	24	0.27	1.7	6.32505	Ambiguous		53.399		55.468		D.C.	2523
CL11788Contig2	SYTC2_XENTR			-3	63	0	17	0.27	1.2	4.40054	Ambiguous		33.591	46.629			D.C.	840
CL4111Contig1	Q7SZ13_XENLA	FIBG_HUMAN	Fibrinogen gamma chain				8.4	0.27	0.6	2.25192	Ambiguous		51.586	50.047	51.512	ER	D.C.	5369
CL10436Contig1	Q4QQZ3_XENLA	PPIH_HUMAN	Peptidyl-prolyl cis-trans isomerase H (PPIase H) (EC 5.2.1.8) (Rotamase H) (Small nuclear ribonucleoprotein particle-specific cyclophilin H) (CypH) (U-snRNP-associated cyclophilin SnuCyp-20) (USA-CYP)	0.13	290	390	270	0.26	19	73.3203	Ambiguous		19.166	76.941	19.208		D.C.	356
CL1185Contig1	Q7ZYR7_XENLA	PPM1G_HUMAN	Protein phosphatase 1G (EC 3.1.3.16) (Protein phosphatase 1C) (Protein phosphatase 2C isoform gamma) (PP2C-gamma) (Protein phosphatase magnesium-dependent 1 gamma)	2.36	6.4	1500	26	0.26	5.4	20.3564	Ambiguous		60.318	36.533	59.272		D.C.	868
CL3569Contig1	Q9IB62_XENLA	CASPA_HUMAN	Caspase-10 (CASP-10) (EC 3.4.22.63) (Apoptotic protease Mch-4) (FAS-associated death domain protein interleukin-1B-converting enzyme 2) (FLICE2) (ICE-like apoptotic protease 4) [Cleaved into: Caspase-10 subunit p23/17; Caspase-10 subunit p12]	-3	2.7	0	2.6	0.26	0.19	0.712276	Ambiguous		59.626	59.626	58.951		D.C.	4760
CL4481Contig1	F6RG76_XENTR	NF1_HUMAN	Neurofibromin (Neurofibromatosis-related protein NF-1) [Cleaved into: Neurofibromin truncated]	0.19	7.6	12	1	0.26	0.073	0.276065	Ambiguous		312.19	85.104	319.372		D.C.	5678
dsrrswapns_comp207672_c0_seq1	B1WBD3_XENLA	SYAC_HUMAN	Alanine--tRNA ligase, cytoplasmic (EC 6.1.1.7) (Alanyl-tRNA synthetase) (AlaRS) (Renal carcinoma antigen NY-REN-42)	-2.5	1900	6	290	0.25	260	1030.69	Ambiguous		107.52	107.518	106.81		D.C.	9160
CL3174Contig2	Q6NTX7_XENLA	KCAB2_HUMAN	Voltage-gated potassium channel subunit beta-2 (EC 1.1.1.-) (K(+) channel subunit beta-2) (Kv-beta-2) (hKvbeta2)	-0.25	12	6.6	41	0.25	2.9	11.9986	Ambiguous		44.32	39.299	41		D.C.	4384
CL1665Contig1	O57468_XENLA	1433E_HUMAN	14-3-3 protein epsilon (14-3-3E)	-0.17	3500	2400	65	0.24	570	2414.22	Ambiguous	BioGrid	29.187	29.187	29.174		D.C.	2048
TC424172	PRPS2_XENLA	PRPS2_HUMAN	Ribose-phosphate pyrophosphokinase 2 (EC 2.7.6.1) (PPRibP) (Phosphoribosyl pyrophosphate synthase II) (PRS-II)	-0.66	310	67	520	0.24	37	154.698	Ambiguous		34.775	34.702	34.769		D.C.	10446
CL11424Contig1	Q6GPD1_XENLA	MD1L1_HUMAN	Mitotic spindle assembly checkpoint protein MAD1 (Mitotic arrest deficient 1-like protein 1) (MAD1-like protein 1) (Mitotic checkpoint MAD1 protein homolog) (HsMAD1) (hMAD1) (Tax-binding protein 181)	1.68	14	640	32	0.24	2.3	9.60103	Ambiguous		83.247	45.696	83.067		D.C.	704
CL5719Contig1	C19L1_XENLA	C19L1_HUMAN	CWF19-like protein 1	2.11	4.5	580	27	0.24	1.9	7.96097	Ambiguous		60.842	60.842	60.619		D.C.	6626
CL13371Contig1	Q5XHB0_XENLA	VPS45_HUMAN	Vacuolar protein sorting-associated protein 45 (h-VPS45) (hlVps45)	-0.25	19	10	19	0.24	1.4	5.78753	Ambiguous		65.197	65.198	65.077		D.C.	1339
CL12447Contig1	SYTC2_XENTR	SYTC2_HUMAN	Probable threonine--tRNA ligase 2, cytoplasmic (EC 6.1.1.3) (Threonyl-tRNA synthetase) (ThrRS) (Threonyl-tRNA synthetase-like protein 2)	-3	30	0	6.7	0.24	0.48	1.98163	Ambiguous		93.85	111.745	92.646		D.C.	1064
CL6263Contig1	Q6AZI9_XENLA	PRPS1_HUMAN	Ribose-phosphate pyrophosphokinase 1 (EC 2.7.6.1) (PPRibP) (Phosphoribosyl pyrophosphate synthase I) (PRS-I)	-0.54	320	93	420	0.23	110	459.026	Ambiguous		34.829	34.829	34.834		D.C.	6987
CL1Contig568	Q2TAF9_XENLA	AN32B_HUMAN	Acidic leucine-rich nuclear phosphoprotein 32 family member B (Acidic protein rich in leucines) (Putative HLA-DR-associated protein I-2) (PHAPI2) (Silver-stainable protein SSP29)	1.9	37	3000	1100	0.23	75	324.378	Ambiguous	NESdbO	28.026	28.141	28.788		D.C.	2842
CL8761Contig1	Q5FWN5_XENLA	MSH6_HUMAN	DNA mismatch repair protein Msh6 (hMSH6) (G/T mismatch-binding protein) (GTBP) (GTMBP) (MutS-alpha 160 kDa subunit) (p160)	2.19	8.1	1200	92	0.23	6.6	28.0391	Ambiguous		149.5	149.499	152.786		D.C.	8275
CL6703Contig1	Q6PA66_XENLA	NPS3A_HUMAN	Protein NipSnap homolog 3A (NipSnap3A) (Protein NipSnap homolog 4) (NipSnap4) (Target for Salmonella secreted protein C) (TassC)	-0.04	0.8	0.7	56	0.23	4	17.4818	Ambiguous		29.338	29.207	28.467		D.C.	7272
CL9317Contig1	Q6GN05_XENLA	SCFD1_HUMAN	Sec1 family domain-containing protein 1 (SLY1 homolog) (Sly1p) (Syntaxin-binding protein 1-like 2)	-0.38	57	24	0.36	0.23	3.9	16.6956	Ambiguous		71.294	71.295	72.38		D.C.	8542
CL3952Contig2	Q0P4U3_XENTR	PTBP2_HUMAN	Polypyrimidine tract-binding protein 2 (Neural polypyrimidine tract-binding protein) (Neurally-enriched homolog of PTB) (PTB-like protein)	0.94	35	300	29	0.23	2.1	8.86454	Ambiguous		57.688	59.243	57.491		D.C.	5183
CL8311Contig1	F7CC85_XENTR	TOP1M_HUMAN	DNA topoisomerase I, mitochondrial (TOP1mt) (EC 5.99.1.2)				12	0.23	0.83	3.5839	Ambiguous		132.11	98.231	69.872	MT	D.C.	8087
CL4108Contig2	SNX30_XENLA	SNX30_HUMAN	Sorting nexin-30	-3	27	0	2.5	0.23	0.18	0.788174	Ambiguous		51.394	51.272	49.677		D.C.	5365
CL3Contig45	ACTB_XENLA	ACTB_HUMAN	Actin, cytoplasmic 1 (Beta-actin) [Cleaved into: Actin, cytoplasmic 1, N-terminally processed]	-0.07	15000	13000	28	0.22	5900	27119	Ambiguous		41.766	41.767	41.737		D.C.	5252
CL11737Contig1	Q6PA24_XENLA	CAZA1_HUMAN	F-actin-capping protein subunit alpha-1 (CapZ alpha-1)	-0.31	940	460	2000	0.22	140	651.457	Ambiguous		34.941	49.824	32.923		D.C.	821
CL8234Contig1	Q5XGS9_XENLA	ORC2_HUMAN	Origin recognition complex subunit 2	-0.24	83	48	38	0.22	2.7	12.3862	Ambiguous		62.796	62.827	65.972		D.C.	8050
CL13051Contig1	F6PM62_XENTR	RPR1A_HUMAN	Regulation of nuclear pre-mRNA domain-containing protein 1A (Cyclin-dependent kinase inhibitor 2B-related protein) (p15INK4B-related protein)	3	0	180	11	0.22	0.81	3.66281	Ambiguous		36.869	36.712	35.72		D.C.	1239
CL3881Contig2	IF6_XENLA	IF6_HUMAN	Eukaryotic translation initiation factor 6 (eIF-6) (B(2)GCN homolog) (B4 integrin interactor) (CAB) (p27(BBP))	0.36	510	1200	870	0.21	62	295.35	Ambiguous		26.636	26.654	26.599		D.C.	5102
CL4156Contig1	B7ZQ46_XENLA	DDX4_HUMAN	Probable ATP-dependent RNA helicase DDX4 (EC 3.6.4.13) (DEAD box protein 4) (Vasa homolog)	-0.88	250	33	26	0.21	52	252.155	Ambiguous		81.526	78.24	79.308		D.C.	5415
CL5046Contig2	PI42C_XENLA	PI42C_HUMAN	Phosphatidylinositol 5-phosphate 4-kinase type-2 gamma (EC 2.7.1.149) (Phosphatidylinositol 5-phosphate 4-kinase type II gamma) (PI(5)P 4-kinase type II gamma) (PIP4KII-gamma)	0.33	230	490	430	0.21	31	146.625	Ambiguous		53.368	47.651	47.3		D.C.	6145
CL7604Contig1	A0JPH9_XENLA	SYF1_HUMAN	Pre-mRNA-splicing factor SYF1 (Protein HCNP) (XPA-binding protein 2)	2.42	3.7	960	130	0.21	9.3	45.2266	Ambiguous		97.862	97.863	100.01		D.C.	7742
CL8040Contig1	MCMBP_XENLA	MCMBP_HUMAN	Mini-chromosome maintenance complex-binding protein (MCM-BP) (MCM-binding protein)	1.3	58	1200	110	0.21	7.5	36.1974	Ambiguous		75.601	70.356	72.98		D.C.	7971
zeinaSSns_comp388041_c1_seq4	Q5XH34_XENLA	2A5E_HUMAN	Serine/threonine-protein phosphatase 2A 56 kDa regulatory subunit epsilon isoform (PP2A B subunit isoform B'-epsilon) (PP2A B subunit isoform B56-epsilon) (PP2A B subunit isoform PR61-epsilon) (PP2A B subunit isoform R5-epsilon)	-3	45	0	28	0.21	2	9.33591	Ambiguous		53.891	54.548	54.699		D.C.	9741
CL1118Contig2	K4JEU1_XENLA	MYO5A_HUMAN	Unconventional myosin-Va (Dilute myosin heavy chain, non-muscle) (Myosin heavy chain 12) (Myosin-12) (Myoxin)	-3	63	0	23	0.21	1.7	8.01936	Ambiguous		212.05	199.308	215.405		D.C.	620
dsrrswapns_comp209133_c0_seq3	F6UFJ3_XENTR	UBP40_HUMAN	Ubiquitin carboxyl-terminal hydrolase 40 (EC 3.4.19.12) (Deubiquitinating enzyme 40) (Ubiquitin thioesterase 40) (Ubiquitin-specific-processing protease 40)	-3	19	0	5.5	0.21	0.4	1.92532	Ambiguous		137.35	153.261	140.13		D.C.	9215
CL249Contig8	A2RRW9_XENLA	CSN4_HUMAN	COP9 signalosome complex subunit 4 (SGN4) (Signalosome subunit 4) (JAB1-containing signalosome subunit 4)	0.32	460	960	99	0.2	58	283.724	Ambiguous	Thakar	46.349	46.349	46.269		D.C.	3583
CL1Contig254	DPOD2_XENLA	DPOD2_HUMAN	DNA polymerase delta subunit 2 (EC 2.7.7.7) (DNA polymerase delta subunit p50)	2.87	2.9	2200	330	0.2	23	118.75	Ambiguous		50.647	50.648	51.289		D.C.	2790
zeinaSSns_comp389152_c0_seq10	Q9DG01_XENLA	KCC2G_HUMAN	Calcium/calmodulin-dependent protein kinase type II subunit gamma (CaM kinase II subunit gamma) (CaMK-II subunit gamma) (EC 2.7.11.17)	-0.66	120	26	220	0.2	16	78.1881	Ambiguous		70.965	60.586	62.609		D.C.	11246
CL4140Contig3	DCTN1_XENLA	DCTN1_HUMAN	Dynactin subunit 1 (150 kDa dynein-associated polypeptide) (DAP-150) (DP-150) (p135) (p150-glued)	-3	170	0	180	0.2	13	64.6317	Ambiguous		137.28	137.285	141.695		D.C.	5398
dsrrswapns_comp209780_c3_seq1	Q7ZWY7_XENLA	AIMP1_HUMAN	Aminoacyl tRNA synthase complex-interacting multifunctional protein 1 (Multisynthase complex auxiliary component p43) [Cleaved into: Endothelial monocyte-activating polypeptide 2 (EMAP-2) (Endothelial monocyte-activating polypeptide II) (EMAP-II) (Small inducible cytokine subfamily E member 1)]	-3	430	0	180	0.2	13	64.0602	Ambiguous		33.179	32.511	34.353		D.C.	9240
CL4380Contig2	Q6GPA9_XENLA	SF3A1_HUMAN	Splicing factor 3A subunit 1 (SF3a120) (Spliceosome-associated protein 114) (SAP 114)	2	9	900	6.4	0.2	9.7	49.6765	Ambiguous		90.352	90.353	88.886		D.C.	5599
zeinaSSns_comp386039_c0_seq2	Q0D258_XENLA	RPR1B_HUMAN	Regulation of nuclear pre-mRNA domain-containing protein 1B (Cell cycle-related and expression-elevated protein in tumor)	3	0	370	54	0.2	3.9	19.8676	Ambiguous		36.726	36.712	36.9		D.C.	3580
CL1416Contig4	A0JM02_XENTR	KDM5C_HUMAN	Lysine-specific demethylase 5C (EC 1.14.11.-) (Histone demethylase JARID1C) (Jumonji/ARID domain-containing protein 1C) (Protein SmcX) (Protein Xe169)	2.05	0.3	31	0.43	0.2	0.03	0.15112	Ambiguous		171.89	120.98	175.72		D.C.	1549
CL2228Contig4	Q8AVW7_XENLA	CAPZB_HUMAN	F-actin-capping protein subunit beta (CapZ beta)	-0.32	750	360	140	0.19	65	337.699	Ambiguous		30.64	30.655	31.35		D.C.	3230
CL2818Contig3	Q7ZWY9_XENLA	SYK_HUMAN	Lysine--tRNA ligase (EC 6.1.1.6) (Lysyl-tRNA synthetase) (LysRS)	-2.41	630	2.4	210	0.19	15	79.8317	Ambiguous		69.588	69.582	68.048		D.C.	4003
dsrrswapns_comp216025_c5_seq28	F6XJT3_XENTR			0.112598	51	66	16	0.19	7.3	38.1223	Ambiguous		42.666				D.C.	9675
CL8056Contig1	PUS10_XENLA	PUS10_HUMAN	Putative tRNA pseudouridine synthase Pus10 (EC 5.4.99.-) (Coiled-coil domain-containing protein 139) (tRNA pseudouridine 55 synthase) (Psi55 synthase) (tRNA pseudouridylate synthase) (tRNA-uridine isomerase)	2.54	1.1	360	46	0.19	3.3	17.2846	Ambiguous		58.589	58.59	60.244		D.C.	7979
CL173Contig2	B2ZP56_XENLA	BAG1_HUMAN	BAG family molecular chaperone regulator 1 (BAG-1) (Bcl-2-associated athanogene 1)	-0.09	48	39	41	0.19	3	15.5622	Ambiguous		24.796	5.026	38.779		D.C.	2184
CL2926Contig1	Q5XGL7_XENLA	RIC8A_HUMAN	Synembryn-A (Protein Ric-8A)	-0.54	31	8.9	19	0.19	1.4	7.11445	Ambiguous	BioGrid	61.567	61.25	59.71		D.C.	4114
CL45Contig6	NACA_XENLA	NACP1_HUMAN	Putative nascent polypeptide-associated complex subunit alpha-like protein (Alpha-NAC pseudogene 1) (NAC-alpha pseudogene 1)	-1.38	6300	260	60	0.18	430	2351.26	Ambiguous		28.137	23.206	23.306		D.C.	5780
CL1026Contig6	Q8UW77_XENLA	MARE1_HUMAN	Microtubule-associated protein RP/EB family member 1 (APC-binding protein EB1) (End-binding protein 1) (EB1)	-0.34	2200	1000	44	0.18	290	1682.89	Ambiguous		32.857	17.758	29.999		D.C.	283
CL84Contig6	143BB_XENLA	1433B_HUMAN	14-3-3 protein beta/alpha (Protein 1054) (Protein kinase C inhibitor protein 1) (KCIP-1) [Cleaved into: 14-3-3 protein beta/alpha, N-terminally processed]	0.01	1500	1500	200	0.18	110	625.771	Ambiguous		27.759	27.759	28.082		D.C.	8166
CL6599Contig2	Q5HZQ7_XENLA	SMD2_HUMAN	Small nuclear ribonucleoprotein Sm D2 (Sm-D2) (snRNP core protein D2)	-0.06	1400	1200	330	0.18	24	130.409	Ambiguous		13.541	13.541	13.527		D.C.	7209
CL7232Contig1	Q5PQ94_XENLA	EXOS4_HUMAN	Exosome complex component RRP41 (Exosome component 4) (Ribosomal RNA-processing protein 41) (p12A)	0.62	87	360	79	0.18	5.7	31.8326	Ambiguous	Thakar	27.403	27.403	26.383		D.C.	7566
dsrrswapns_comp212236_c10_seq2	ANM1A_XENLA	ANM1_HUMAN	Protein arginine N-methyltransferase 1 (EC 2.1.1.-) (Histone-arginine N-methyltransferase PRMT1) (EC 2.1.1.125) (Interferon receptor 1-bound protein 4)	0.14	790	1100	1800	0.17	130	750.716	Ambiguous		42.337	42.325	41.516		D.C.	9375
CL1587Contig6	B1WBE0_XENLA	SYEP_HUMAN	Bifunctional glutamate/proline--tRNA ligase (Bifunctional aminoacyl-tRNA synthetase) (Cell proliferation-inducing gene 32 protein) (Glutamatyl-prolyl-tRNA synthetase) [Includes: Glutamate--tRNA ligase (EC 6.1.1.17) (Glutamyl-tRNA synthetase) (GluRS); Proline--tRNA ligase (EC 6.1.1.15) (Prolyl-tRNA synthetase)]	-2.61	650	1.6	180	0.17	13	77.0886	Ambiguous	BioGrid	180.73	169.448	170.591		D.C.	1939
CL4875Contig3	A2VD64_XENLA	PCH2_HUMAN	Pachytene checkpoint protein 2 homolog (Human papillomavirus type 16 E1 protein-binding protein) (16E1-BP) (HPV16 E1 protein-binding protein) (Thyroid hormone receptor interactor 13) (Thyroid receptor-interacting protein 13) (TR-interacting protein 13) (TRIP-13)	-1.97	130	1.4	68	0.17	4.8	29.046	Ambiguous		49.195	39.855	48.551		D.C.	5996
CL6084Contig1	Q9DE47_XENLA	DPOE1_HUMAN	DNA polymerase epsilon catalytic subunit A (EC 2.7.7.7) (DNA polymerase II subunit A)	2.34	1.9	410	19	0.17	1.3	8.09725	Ambiguous		262.06	187.568	261.518		D.C.	6889
[truncated: 1,527 more rows]

## Sheet: Extended table
				Protein localization and concentrations			Binding to CRM1													Blast result for mapping to UniProt human orthologue				UniProt Data for human orthologue							Mapping to human protein complex databases		Blast result for mapping to UniProt Xenopus protein				UniProt data for Xenopus protein								MaxQuant Output
[truncated: 3,348 more rows]
[truncated: 4 more columns]

[truncated: 12 more sheets: Translation factors, Vesicle coat proteins, Cytoskeleton, Centrosomal proteins, Aminoacyl tRNA ligases, Cytoplasmic mRNA biogenesis, Protein kinases, Protein phosphatases, Ubiquitin pathway, mTOR, Glycolysis, Metabolic enzymes]
