# Supplementary material for: A deep proteomics perspective on CRM1-mediated nuclear export and nucleocytoplasmic partitioning
Source: eLife. 2015 Dec 17;4:e11466. doi: 10.7554/eLife.11466 (PMC4764573; doi:10.7554/eLife.11466)
Supplement: Supplementary file 3. — DOI: http://dx.doi.org/10.7554/eLife.11466.016 [file elife-11466-supp3.xlsx]

## Sheet: Index
	Index for HeLa CRM1 affinity chromatography MS Data
	Main Table			MS data sheet with simplified columns
									Category threshold for HeLa cells CRM1 cargo analysis
	Extended Table			MS data sheet with full columns					# of proteins in each category
													RanGTP stimulation	Enrichment from input	Molar fraction in "CRM1+RanGTP" (×10ˆ6)	Molar fraction in starting extract (x10ˆ6)	No of proteins	No of flagged proteins	CRM1 Exportome
									Categories of
	Translation Factors			Aminoacyl tRNA Ligases					CRM1-binders
									A	A1			≥500	≥4	≥50	---	506	5	1038 (Note that flagged proteins are excluded)
	Vesicle Coat Proteins			Cytoplasmic mRNA Metabolism						A2			2-499	≥100	≥50	---	37	2
									B (not part of A)	B1		B1a	50-500	≥4	≥50	---	63	1
												B1b	≥500	2-4	≥50	---	54	2
	Cytoskeleton Proteins			Protein Kinases								B1c	≥500	≥4	10-50	---	---	1
										B2		B2a	10-499	20-100	≥50	---	10	1
												B2b	2-499	≥100	10-50	---	161	6
	Centrosomal Proteins			Protein Phosphatases					C/Low abundant				---	---	≥1	---	239	15
									detected only in the “CRM1+RanGTP”-fraction, but not part of A or B
									Ambiguous		Ambiguous Cargoes (not part of A, B or C)		≥ 50	≥ 3	---	---	289	13
	Autophagy Proteins			Ubiquitin System							Ambiguous		Proteins that do not satisfy any of the criteria above			---	1455	83
											Ambiguous Non-binder		---	< 0.01 & 0	---	<10	673	82
									Non-binder (NB)				---	< 0.01 & 0	---	≥10	880	63
									NPC and transport-related				Manually assigned			---	43	1
	Table S3. Identification of human CRM1 cargoes from HeLa cells This Excel file is based on mass spectrometric protein quantifications from three samples, namely: (i) input extract used for affinity chromatography, (ii) sample "bound to CRM1 w/o Ran", and (iii) sample "bound to CRM1+RanGTP". For each identified unique protein, three parameters were then derived: RanGTP stimulation = iBAQ[CRM1+RanG…

## Sheet: Main table
		Binding to CRM1
UniProtLink	Protein name	RanGTP Stimulation	Enrichment from input	Molar Fraction in CRM1+RanGTP (×10^6)	Molar Fraction in Input (×10^6)	Category	Simplified Localization UniProt	Reported CRM1 interactions	Mw (kDa)	FLAGS	Sorting	id
RN146_HUMAN	E3 ubiquitin-protein ligase RNF146 (EC 6.3.2.-) (Dactylidin) (Iduna) (RING finger protein 146)	3400	2500	420	0.0437	Cargo A	Both		38.818		A1	4170
TFEB_HUMAN	Transcription factor EB (Class E basic helix-loop-helix protein 35) (bHLHe35)	2800	2500	340	0.0437	Cargo A	Both		52.864		A1	958
WIBG_HUMAN	Partner of Y14 and mago (Protein wibg homolog)	2600	2500	320	0.0437	Cargo A	Both	Thakar&Karaca	22.655		A1	3675
CA198_HUMAN	Uncharacterized protein C1orf198	2400	2500	290	0.0437	Cargo A	Cytoplasm		36.346		A1	3926
SEP10_HUMAN	Septin-10	2400	2500	290	0.0437	Cargo A	Both		50.065		A1	4323
RCN2_HUMAN	Reticulocalbin-2 (Calcium-binding protein ERC-55) (E6-binding protein) (E6BP)	2300	2500	280	0.0437	Cargo A	Cytoplasm	BioGrid	36.876	ER	A1	2101
CCNB1_HUMAN	G2/mitotic-specific cyclin-B1	2200	2500	270	0.0437	Cargo A	Both	NESdbH, NESdbO, Thakar&Karaca	48.337		A1	890
GRL1A_HUMAN	DNA-directed RNA polymerase II subunit GRINL1A (DNA-directed RNA polymerase II subunit M) (Glutamate receptor-like protein 1A)	2100	2500	260	0.0437	Cargo A	Nucleus		40.733		A1	815
DRG1_HUMAN	Developmentally-regulated GTP-binding protein 1 (DRG-1) (Neural precursor cell expressed developmentally down-regulated protein 3) (NEDD-3)	1900	2500	240	0.0437	Cargo A	Cytoplasm		40.542		A1	4609
WEE1_HUMAN	Wee1-like protein kinase (WEE1hu) (EC 2.7.10.2) (Wee1A kinase)	1900	2500	240	0.0437	Cargo A	Nucleus	NESdbH	71.597		A1	1119
TFCP2_HUMAN	Alpha-globin transcription factor CP2 (SAA3 enhancer factor) (Transcription factor LSF)	1800	2500	230	0.0437	Cargo A	Nucleus	Thakar&Karaca	57.255		A1	1923
HAUS7_HUMAN	HAUS augmin-like complex subunit 7 (26S proteasome-associated UCH37-interacting protein 1) (UCHL5-interacting protein) (X-linked protein STS1769)	1700	2500	210	0.0437	Cargo A	Cytoplasm		37.524		A1	3630
PDLI7_HUMAN	PDZ and LIM domain protein 7 (LIM mineralization protein) (LMP) (Protein enigma)	1700	2500	210	0.0437	Cargo A	Cytoplasm		49.844		A1	4112
RIOK3_HUMAN	Serine/threonine-protein kinase RIO3 (EC 2.7.11.1) (RIO kinase 3) (sudD homolog)	1700	2500	210	0.0437	Cargo A			59.092		A1	193
RTN4_HUMAN	Reticulon-4 (Foocen) (Neurite outgrowth inhibitor) (Nogo protein) (Neuroendocrine-specific protein) (NSP) (Neuroendocrine-specific protein C homolog) (RTN-x) (Reticulon-5)	1700	2500	210	0.0437	Cargo A	Cytoplasm		40.317	TM	A1	4096
LST8_HUMAN	Target of rapamycin complex subunit LST8 (TORC subunit LST8) (G protein beta subunit-like) (Gable) (Protein GbetaL) (Mammalian lethal with SEC13 protein 8) (mLST8)	1500	2500	180	0.0437	Cargo A	Cytoplasm		35.876		A1	3743
YAED1_HUMAN	Yae1 domain-containing protein 1	1400	2500	180	0.0437	Cargo A			25.299		A1	4133
APC7_HUMAN	Anaphase-promoting complex subunit 7 (APC7) (Cyclosome subunit 7)	1400	2500	170	0.0437	Cargo A			60.002		A1	4466
AP3M2_HUMAN	AP-3 complex subunit mu-2 (Adaptor-related protein complex 3 subunit mu-2) (Clathrin assembly protein assembly protein complex 3 mu-2 medium chain) (Clathrin coat assembly protein AP47 homolog 2) (Clathrin coat-associated protein AP47 homolog 2) (Golgi adaptor AP-1 47 kDa protein homolog 2) (HA1 47 kDa subunit homolog 2) (Mu3B-adaptin) (P47B)	1300	2500	160	0.0437	Cargo A	Cytoplasm		46.977		A1	1519
RAD18_HUMAN	E3 ubiquitin-protein ligase RAD18 (EC 6.3.2.-) (Postreplication repair protein RAD18) (hHR18) (hRAD18) (RING finger protein 73)	1300	2500	160	0.0437	Cargo A	Nucleus		56.222		A1	4153
SDCG3_HUMAN	Serologically defined colon cancer antigen 3 (Antigen NY-CO-3)	1200	2500	150	0.0437	Cargo A	Cytoplasm		40.058		A1	3364
ABLM1_HUMAN	Actin-binding LIM protein 1 (abLIM-1) (Actin-binding LIM protein family member 1) (Actin-binding double zinc finger protein) (LIMAB1) (Limatin)	1200	2500	140	0.0437	Cargo A	Cytoplasm		81.12		A1	183
FA53B_HUMAN	Protein FAM53B	1100	2500	140	0.0437	Cargo A			45.768		A1	2082
P33MX_HUMAN	Putative monooxygenase p33MONOX (EC 1.-.-.-) (Brain-derived rescue factor p60MONOX) (Flavin monooxygenase motif-containing protein of 33 kDa)	1100	2500	140	0.0437	Cargo A	Cytoplasm		33.246		A1	3326
SPCS_HUMAN	O-phosphoseryl-tRNA(Sec) selenium transferase (EC 2.9.1.2) (Liver-pancreas antigen) (LP) (SLA-p35) (SLA/LP autoantigen) (Selenocysteine synthase) (Sec synthase) (Selenocysteinyl-tRNA(Sec) synthase) (Sep-tRNA:Sec-tRNA synthase) (SepSecS) (Soluble liver antigen) (SLA) (UGA suppressor tRNA-associated protein) (tRNA(Ser/Sec)-associated antigenic protein)	1100	2500	130	0.0437	Cargo A	Cytoplasm		55.726		A1	4070
FBX9_HUMAN	F-box only protein 9 (Cross-immune reaction antigen 1) (Renal carcinoma antigen NY-REN-57)	950	2500	120	0.0437	Cargo A	Cytoplasm		51.135		A1	4479
MKRN2_HUMAN	Probable E3 ubiquitin-protein ligase makorin-2 (EC 6.3.2.-) (RING finger protein 62)	1000	2500	120	0.0437	Cargo A			46.94		A1	3850
RIMKB_HUMAN	Beta-citrylglutamate synthase B (EC 6.3.1.17) (N-acetyl-aspartylglutamate synthetase B) (NAAG synthetase B) (NAAGS) (EC 6.3.2.41) (Ribosomal protein S6 modification-like protein B)	960	2500	120	0.0437	Cargo A	Cytoplasm		42.464		A1	4516
TM1L2_HUMAN	TOM1-like protein 2 (Target of Myb-like protein 2)	950	2500	120	0.0437	Cargo A			55.556		A1	2665
FBLI1_HUMAN	Filamin-binding LIM protein 1 (FBLP-1) (Migfilin) (Mitogen-inducible 2-interacting protein) (MIG2-interacting protein)	900	2500	110	0.0437	Cargo A	Cytoplasm		40.669		A1	3171
CE030_HUMAN	UNC119-binding protein C5orf30	870	2400	110	0.0437	Cargo A	Cytoplasm		23.083		A1	3452
LTV1_HUMAN	Protein LTV1 homolog	870	2400	110	0.0437	Cargo A		Thakar&Karaca	54.854		A1	3444
REN3B_HUMAN	Regulator of nonsense transcripts 3B (Nonsense mRNA reducing factor 3B) (Up-frameshift suppressor 3 homolog B) (hUpf3B) (Up-frameshift suppressor 3 homolog on chromosome X) (hUpf3p-X)	790	2200	97	0.0437	Cargo A	Both		56.213		A1	3813
SIN1_HUMAN	Target of rapamycin complex 2 subunit MAPKAP1 (TORC2 subunit MAPKAP1) (Mitogen-activated protein kinase 2-associated protein 1) (Stress-activated map kinase-interacting protein 1) (SAPK-interacting protein 1) (mSIN1)	790	2200	97	0.0437	Cargo A	Both		53.743		A1	3642
DVL3_HUMAN	Segment polarity protein dishevelled homolog DVL-3 (Dishevelled-3) (DSH homolog 3)	780	2200	96	0.0437	Cargo A	Cytoplasm		76.255		A1	3287
MPLKI_HUMAN	M-phase-specific PLK1-interacting protein (TTD non-photosensitive 1 protein)	770	2100	94	0.0437	Cargo A	Both		19.147		A1	3093
OSER1_HUMAN	Oxidative stress-responsive serine-rich protein 1 (Oxidative stress-responsive protein 1) (Peroxide-inducible transcript 1 protein)	730	2000	89	0.0437	Cargo A			31.779		A1	4242
HAUS1_HUMAN	HAUS augmin-like complex subunit 1 (Coiled-coil domain-containing protein 5) (Enhancer of invasion-cluster) (HEI-C)	720	2000	88	0.0437	Cargo A	Cytoplasm		31.863		A1	3374
GORS1_HUMAN	Golgi reassembly-stacking protein 1 (Golgi peripheral membrane protein p65) (Golgi phosphoprotein 5) (GOLPH5) (Golgi reassembly-stacking protein of 65 kDa) (GRASP65)	710	2000	87	0.0437	Cargo A	Cytoplasm		46.482		A1	3662
MEX3D_HUMAN	RNA-binding protein MEX3D (RING finger and KH domain-containing protein 1) (RING finger protein 193) (TINO)	710	2000	86	0.0437	Cargo A	Both		64.882		A1	2842
FARP2_HUMAN	FERM, RhoGEF and pleckstrin domain-containing protein 2 (FERM domain including RhoGEF) (FIR) (Pleckstrin homology domain-containing family C member 3) (PH domain-containing family C member 3)	680	1900	84	0.0437	Cargo A			72.262		A1	549
DEN1B_HUMAN	DENN domain-containing protein 1B (Connecdenn 2) (Protein FAM31B)	670	1900	82	0.0437	Cargo A	Cytoplasm		86.551		A1	2583
UBIP1_HUMAN	Upstream-binding protein 1 (Transcription factor LBP-1)	670	1900	82	0.0437	Cargo A	Nucleus		56.452		A1	4296
TNIP2_HUMAN	TNFAIP3-interacting protein 2 (A20-binding inhibitor of NF-kappa-B activation 2) (ABIN-2) (Fetal liver LKB1-interacting protein)	670	1900	81	0.0437	Cargo A	Both		48.699		A1	3073
YTHD1_HUMAN	YTH domain-containing family protein 1 (Dermatomyositis associated with cancer putative autoantigen 1) (DACA-1)	660	1800	81	0.0437	Cargo A			60.873		A1	3793
CA109_HUMAN	Uncharacterized protein C1orf109	650	1800	79	0.0437	Cargo A			23.373		A1	4237
KAP1_HUMAN	cAMP-dependent protein kinase type I-beta regulatory subunit	640	1800	78	0.0437	Cargo A	Cytoplasm		43.072		A1	1138
SMAG2_HUMAN	Protein Smaug homolog 2 (Smaug 2) (hSmaug2) (Sterile alpha motif domain-containing protein 4B) (SAM domain-containing protein 4B)	640	1800	78	0.0437	Cargo A	Both		75.483		A1	2425
CEP78_HUMAN	Centrosomal protein of 78 kDa (Cep78)	610	1700	75	0.0437	Cargo A	Cytoplasm		76.396		A1	2418
FOXK2_HUMAN	Forkhead box protein K2 (Cellular transcription factor ILF-1) (FOXK1) (Interleukin enhancer-binding factor 1)	620	1700	75	0.0437	Cargo A	Nucleus		69.061		A1	1802
MEX3C_HUMAN	RNA-binding E3 ubiquitin-protein ligase MEX3C (EC 6.3.2.-) (RING finger and KH domain-containing protein 2) (RING finger protein 194)	600	1700	73	0.0437	Cargo A	Both		69.366		A1	2476
MYC_HUMAN	Myc proto-oncogene protein (Class E basic helix-loop-helix protein 39) (bHLHe39) (Proto-oncogene c-Myc) (Transcription factor p64)	590	1600	72	0.0437	Cargo A	Nucleus	BioGrid	48.804		A1	687
CC85C_HUMAN	Coiled-coil domain-containing protein 85C	580	1600	70	0.0437	Cargo A	Cytoplasm		45.209		A1	27
CRY1_HUMAN	Cryptochrome-1	570	1600	69	0.0437	Cargo A	Both		66.394		A1	2280
TGFI1_HUMAN	Transforming growth factor beta-1-induced transcript 1 protein (Androgen receptor coactivator 55 kDa protein) (Androgen receptor-associated protein of 55 kDa) (Hydrogen peroxide-inducible clone 5 protein) (Hic-5)	560	1600	68	0.0437	Cargo A	Both		47.941		A1	297
WDR91_HUMAN	WD repeat-containing protein 91	1700	1500	210	0.136	Cargo A			83.343		A1	11
RELB_HUMAN	Transcription factor RelB (I-Rel)	550	1500	68	0.0437	Cargo A	Both		62.134		A1	1803
OSCP1_HUMAN	Protein OSCP1 (hOSCP1) (Organic solute transport protein 1) (Oxidored-nitro domain-containing protein 1)	550	1500	67	0.0437	Cargo A	Cytoplasm		43.27		A1	3183
TFE3_HUMAN	Transcription factor E3 (Class E basic helix-loop-helix protein 33) (bHLHe33)	550	1500	67	0.0437	Cargo A	Nucleus		61.52		A1	959
AVEN_HUMAN	Cell death regulator Aven	540	1500	66	0.0437	Cargo A	Cytoplasm	NESdbH	38.506		A1	4101
NUFP1_HUMAN	Nuclear fragile X mental retardation-interacting protein 1 (Nuclear FMRP-interacting protein 1)	500	1400	62	0.0437	Cargo A	Nucleus		56.299		A1	4422
RTKN_HUMAN	Rhotekin	510	1400	62	0.0437	Cargo A			61.228		A1	3695
MFAP1_HUMAN	Microfibrillar-associated protein 1	880	1200	110	0.0892	Cargo A	Other		51.958		A1	1549
HAUS8_HUMAN	HAUS augmin-like complex subunit 8 (HEC1/NDC80-interacting centrosome-associated protein 1) (Sarcoma antigen NY-SAR-48)	2300	1100	280	0.241	Cargo A	Cytoplasm		38.464		A1	3699
UVRAG_HUMAN	UV radiation resistance-associated gene protein (p63)	550	1100	68	0.0617	Cargo A	Cytoplasm		78.15		A1	4360
ZCCHV_HUMAN	Zinc finger CCCH-type antiviral protein 1 (ADP-ribosyltransferase diphtheria toxin-like 13) (ARTD13) (Zinc finger CCCH domain-containing protein 2) (Zinc finger antiviral protein) (ZAP)	910	1000	130	0.126	Cargo A	Both	NESdbO	101.43		A1	2717
ZFYV1_HUMAN	Zinc finger FYVE domain-containing protein 1 (Double FYVE-containing protein 1) (SR3) (Tandem FYVE fingers-1)	590	790	72	0.092	Cargo A	Cytoplasm		87.175		A1	4041
3BP5_HUMAN	SH3 domain-binding protein 5 (SH3BP-5) (SH3 domain-binding protein that preferentially associates with BTK)	3800	780	460	0.584	Cargo A	Cytoplasm		50.424		A1	365
SYDE1_HUMAN	Rho GTPase-activating protein SYDE1 (Synapse defective protein 1 homolog 1) (Protein syd-1 homolog 1)	500	780	61	0.0785	Cargo A			79.792		A1	2667
CB044_HUMAN	WD repeat-containing protein C2orf44	1800	710	280	0.392	Cargo A			79.135		A1	3959
SIK2_HUMAN	Serine/threonine-protein kinase SIK2 (EC 2.7.11.1) (Qin-induced kinase) (Salt-inducible kinase 2) (SIK-2) (Serine/threonine-protein kinase SNF1-like kinase 2)	1000	680	130	0.186	Cargo A	Cytoplasm		103.91		A1	3870
RENT2_HUMAN	Regulator of nonsense transcripts 2 (Nonsense mRNA reducing factor 2) (Up-frameshift suppressor 2 homolog) (hUpf2)	540	620	66	0.107	Cargo A	Cytoplasm		147.81		A1	4030
TISB_HUMAN	Zinc finger protein 36, C3H1 type-like 1 (Butyrate response factor 1) (EGF-response factor 1) (ERF-1) (Protein TIS11B)	780	580	95	0.164	Cargo A	Both		36.313		A1	1875
FA83A_HUMAN	Protein FAM83A (Tumor antigen BJ-TSA-9) (Tumor-specific gene expressed in prostate protein)	2100	550	260	0.469	Cargo A			47.457		A1	2800
NOC2L_HUMAN	Nucleolar complex protein 2 homolog (Protein NOC2 homolog) (NOC2-like protein) (Novel INHAT repressor)	1100	550	130	0.244	Cargo A	Nucleus		84.918		A1	4688
BYST_HUMAN	Bystin	1100	540	130	0.246	Cargo A	Both	Thakar&Karaca	49.601		A1	2062
FR1OP_HUMAN	FGFR1 oncogene partner	11000	470	1300	2.8	Cargo A	Cytoplasm		43.064		A1	630
ZC12A_HUMAN	Ribonuclease ZC3H12A (EC 3.1.-.-) (MCP-induced protein 1) (Zinc finger CCCH domain-containing protein 12A)	3500	440	420	0.969	Cargo A	Both		65.698		A1	2402
ZC3HF_HUMAN	Zinc finger CCCH domain-containing protein 15 (DRG family-regulatory protein 1) (Likely ortholog of mouse immediate early response erythropoietin 4)	710	400	86	0.216	Cargo A	Both		48.602		A1	3159
SEPT8_HUMAN	Septin-8	1900	380	230	0.605	Cargo A	Cytoplasm		49.814		A1	3235
GLCI1_HUMAN	Glucocorticoid-induced transcript 1 protein	3200	360	390	1.09	Cargo A			58.023		A1	2813
CEP41_HUMAN	Centrosomal protein of 41 kDa (Cep41) (Testis-specific gene A14 protein)	2600	310	320	1.03	Cargo A	Cytoplasm		41.368		A1	3797
CNOT4_HUMAN	CCR4-NOT transcription complex subunit 4 (EC 6.3.2.-) (CCR4-associated factor 4) (E3 ubiquitin-protein ligase CNOT4) (Potential transcriptional repressor NOT4Hp)	2000	260	250	0.958	Cargo A	Both		70.338		A1	625
EPN4_HUMAN	Clathrin interactor 1 (Clathrin-interacting protein localized in the trans-Golgi region) (Clint) (Enthoprotin) (Epsin-4) (Epsin-related protein) (EpsinR)	3400	240	420	1.74	Cargo A	Cytoplasm		70.294		A1	2126
CEP55_HUMAN	Centrosomal protein of 55 kDa (Cep55) (Up-regulated in colon cancer 6)	610	240	75	0.318	Cargo A	Cytoplasm		54.178		A1	2373
TISD_HUMAN	Zinc finger protein 36, C3H1 type-like 2 (ZFP36-like 2) (Butyrate response factor 2) (EGF-response factor 2) (ERF-2) (Protein TIS11D)	8900	200	1100	5.58	Cargo A	Both		51.062		A1	1346
TJAP1_HUMAN	Tight junction-associated protein 1 (Protein incorporated later into tight junctions) (Tight junction protein 4)	3300	200	410	2.01	Cargo A	Cytoplasm		60.72		A1	2416
KANK2_HUMAN	KN motif and ankyrin repeat domain-containing protein 2 (Ankyrin repeat domain-containing protein 25) (Matrix-remodeling-associated protein 3) (SRC-1-interacting protein) (SIP) (SRC-interacting protein) (SRC1-interacting protein)	870	200	110	0.518	Cargo A	Cytoplasm		90.043		A1	2513
NOB1_HUMAN	RNA-binding protein NOB1 (Phosphorylation regulatory protein HP-10) (Protein ART-4)	11000	190	1400	7.16	Cargo A	Nucleus		46.674		A1	4527
PAIP2_HUMAN	Polyadenylate-binding protein-interacting protein 2 (PABP-interacting protein 2) (PAIP-2) (Poly(A)-binding protein-interacting protein 2)	1500	190	180	0.954	Cargo A	Cytoplasm		14.984		A1	3641
S7A6O_HUMAN	Probable RNA polymerase II nuclear localization protein SLC7A6OS (ADAMS proteinase-related protein) (Solute carrier family 7 member 6 opposite strand transcript)	6000	180	730	4.03	Cargo A	Both		35.027		A1	3379
DVL2_HUMAN	Segment polarity protein dishevelled homolog DVL-2 (Dishevelled-2) (DSH homolog 2)	1700	180	210	1.2	Cargo A	Cytoplasm		78.947		A1	186
DYR1A_HUMAN	Dual specificity tyrosine-phosphorylation-regulated kinase 1A (EC 2.7.12.1) (Dual specificity YAK1-related kinase) (HP86) (Protein kinase minibrain homolog) (MNBH) (hMNB)	540	180	66	0.375	Cargo A	Nucleus		84.556		A1	2044
RPAP2_HUMAN	Putative RNA polymerase II subunit B1 CTD phosphatase RPAP2 (EC 3.1.3.16) (RNA polymerase II-associated protein 2)	7900	170	960	5.6	Cargo A	Both		69.508		A1	2914
HAUS5_HUMAN	HAUS augmin-like complex subunit 5	1400	170	170	0.996	Cargo A	Cytoplasm		71.682		A1	558
NUMB_HUMAN	Protein numb homolog (h-Numb) (Protein S171)	6000	160	730	4.58	Cargo A	Cytoplasm		69.43		A1	1401
AP2M1_HUMAN	AP-2 complex subunit mu (AP-2 mu chain) (Adaptin-mu2) (Adaptor protein complex AP-2 subunit mu) (Adaptor-related protein complex 2 subunit mu) (Clathrin assembly protein complex 2 mu medium chain) (Clathrin coat assembly protein AP50) (Clathrin coat-associated protein AP50) (HA2 50 kDa subunit) (Plasma membrane adaptor AP-2 50 kDa protein)	3500	160	430	2.78	Cargo A	Cytoplasm		49.389		A1	3377
HAUS4_HUMAN	HAUS augmin-like complex subunit 4	3500	160	430	2.74	Cargo A	Cytoplasm		42.399		A1	3953
FCHO2_HUMAN	FCH domain only protein 2	940	160	120	0.708	Cargo A	Cytoplasm		88.923		A1	1908
APBA3_HUMAN	Amyloid beta A4 precursor protein-binding family A member 3 (Adapter protein X11gamma) (Neuron-specific X11L2 protein) (Neuronal Munc18-1-interacting protein 3) (Mint-3)	3300	150	410	2.74	Cargo A	Cytoplasm	NESdbH	61.453		A1	665
KC1E_HUMAN	Casein kinase I isoform epsilon (CKI-epsilon) (CKIe) (EC 2.7.11.1)	1400	150	170	1.07	Cargo A	Both		47.315		A1	1397
TFE2_HUMAN	Transcription factor E2-alpha (Class B basic helix-loop-helix protein 21) (bHLHb21) (Immunoglobulin enhancer-binding factor E12/E47) (Immunoglobulin transcription factor 1) (Kappa-E2-binding factor) (Transcription factor 3) (TCF-3) (Transcription factor ITF-1)	900	150	110	0.721	Cargo A	Nucleus		67.6		A1	909
ARFG1_HUMAN	ADP-ribosylation factor GTPase-activating protein 1 (ARF GAP 1) (ADP-ribosylation factor 1 GTPase-activating protein) (ARF1 GAP) (ARF1-directed GTPase-activating protein)	2000	140	2400	17.7	Cargo A	Cytoplasm		44.667		A1	3000
PAK4_HUMAN	Serine/threonine-protein kinase PAK 4 (EC 2.7.11.1) (p21-activated kinase 4) (PAK-4)	2800	140	340	2.5	Cargo A	Cytoplasm	NESdbH	64.071		A1	663
ZNRF2_HUMAN	E3 ubiquitin-protein ligase ZNRF2 (EC 6.3.2.-) (Protein Ells2) (RING finger protein 202) (Zinc/RING finger protein 2)	2800	140	340	2.36	Cargo A	Cytoplasm		24.115		A1	3078
TAB2_HUMAN	TGF-beta-activated kinase 1 and MAP3K7-binding protein 2 (Mitogen-activated protein kinase kinase kinase 7-interacting protein 2) (TAK1-binding protein 2) (TAB-2) (TGF-beta-activated kinase 1-binding protein 2)	950	130	120	0.898	Cargo A	Cytoplasm		76.493		A1	4276
ERF_HUMAN	ETS domain-containing transcription factor ERF (Ets2 repressor factor) (PE-2)	900	130	110	0.878	Cargo A	Nucleus		58.702		A1	1428
ARRB2_HUMAN	Beta-arrestin-2 (Arrestin beta-2)	590	130	73	0.537	Cargo A	Both	NESdbO	46.105		A1	1156
SC23A_HUMAN	Protein transport protein Sec23A (SEC23-related protein A)	2600	120	1000	8.4	Cargo A	Cytoplasm		86.16		A1	2227
TBD2B_HUMAN	TBC1 domain family member 2B	1400	120	210	1.84	Cargo A			109.88		A1	4579
CHMP7_HUMAN	Charged multivesicular body protein 7 (Chromatin-modifying protein 7)	940	110	4400	40.5	Cargo A	Cytoplasm		50.91		A1	3175
IF2B_HUMAN	Eukaryotic translation initiation factor 2 subunit 2 (Eukaryotic translation initiation factor 2 subunit beta) (eIF-2-beta)	34000	110	4100	35.8	Cargo A			38.388		A1	964
CHM2B_HUMAN	Charged multivesicular body protein 2b (CHMP2.5) (Chromatin-modifying protein 2b) (CHMP2b) (Vacuolar protein sorting-associated protein 2-2) (Vps2-2) (hVps2-2)	17000	110	2100	19.4	Cargo A	Cytoplasm		23.906		A1	4593
ARFG2_HUMAN	ADP-ribosylation factor GTPase-activating protein 2 (ARF GAP 2) (GTPase-activating protein ZNF289) (Zinc finger protein 289)	2200	110	1800	15.7	Cargo A	Cytoplasm		56.72		A1	2995
F122A_HUMAN	Protein FAM122A	9300	110	1100	10.3	Cargo A			30.529		A1	3394
STK3_HUMAN	Serine/threonine-protein kinase 3 (EC 2.7.11.1) (Mammalian STE20-like protein kinase 2) (MST-2) (STE20-like kinase MST2) (Serine/threonine-protein kinase Krs-1) [Cleaved into: Serine/threonine-protein kinase 3 36kDa subunit (MST2/N); Serine/threonine-protein kinase 3 20kDa subunit (MST2/C)]	6800	110	840	7.88	Cargo A	Both		56.3		A1	1975
AJUBA_HUMAN	LIM domain-containing protein ajuba	2400	110	290	2.68	Cargo A	Both		56.933		A1	3469
DTBP1_HUMAN	Dysbindin (Biogenesis of lysosome-related organelles complex 1 subunit 8) (BLOC-1 subunit 8) (Dysbindin-1) (Dystrobrevin-binding protein 1) (Hermansky-Pudlak syndrome 7 protein) (HPS7 protein)	1700	110	200	1.79	Cargo A	Both	NESdbH	34.83		A1	3415
EIF3D_HUMAN	Eukaryotic translation initiation factor 3 subunit D (eIF3d) (Eukaryotic translation initiation factor 3 subunit 7) (eIF-3-zeta) (eIF3 p66)	1500	110	180	1.62	Cargo A	Cytoplasm		63.972		A1	271
DEN1A_HUMAN	DENN domain-containing protein 1A (Connecdenn 1) (Connecdenn) (Protein FAM31A)	1700	100	200	2.03	Cargo A	Cytoplasm		110.58		A1	3137
TRIM5_HUMAN	Tripartite motif-containing protein 5 (EC 6.3.2.-) (RING finger protein 88)	1000	99	120	1.24	Cargo A	Cytoplasm	NESdbO	56.338		A1	3822
AP4AT_HUMAN	AP-4 complex accessory subunit tepsin (ENTH domain-containing protein 2) (Epsin for AP-4) (Tetra-epsin)	1000	98	120	1.25	Cargo A	Cytoplasm		55.136		A1	3518
SC24B_HUMAN	Protein transport protein Sec24B (SEC24-related protein B)	950	97	120	1.2	Cargo A	Cytoplasm		133.63		A1	617
NUMBL_HUMAN	Numb-like protein (Numb-related protein) (Numb-R)	2000	94	250	2.64	Cargo A	Cytoplasm		64.891		A1	4797
MAP2_HUMAN	Methionine aminopeptidase 2 (MAP 2) (MetAP 2) (EC 3.4.11.18) (Initiation factor 2-associated 67 kDa glycoprotein) (p67) (p67eIF2) (Peptidase M)	3500	93	430	4.64	Cargo A	Cytoplasm		52.891		A1	1433
SEPT7_HUMAN	Septin-7 (CDC10 protein homolog)	12000	92	1500	16.1	Cargo A	Cytoplasm		50.58		A1	2269
KCMF1_HUMAN	E3 ubiquitin-protein ligase KCMF1 (EC 6.3.2.-) (FGF-induced in gastric cancer) (Potassium channel modulatory factor) (PCMF) (ZZ-type zinc finger-containing protein 1)	2800	92	350	3.77	Cargo A			41.945		A1	4316
ADDG_HUMAN	Gamma-adducin (Adducin-like protein 70)	4700	90	580	6.39	Cargo A	Cytoplasm		75.67		A1	4400
DCP1A_HUMAN	mRNA-decapping enzyme 1A (EC 3.-.-.-) (Smad4-interacting transcriptional co-activator) (Transcription factor SMIF)	2000	89	250	2.81	Cargo A	Both		63.309		A1	4089
CDC23_HUMAN	Cell division cycle protein 23 homolog (Anaphase-promoting complex subunit 8) (APC8) (Cyclosome subunit 8)	1100	88	140	1.56	Cargo A		Thakar&Karaca	68.833		A1	4465
HTF4_HUMAN	Transcription factor 12 (TCF-12) (Class B basic helix-loop-helix protein 20) (bHLHb20) (DNA-binding protein HTF4) (E-box-binding protein) (Transcription factor HTF-4)	960	88	120	1.34	Cargo A	Nucleus		72.964		A1	3585
STK4_HUMAN	Serine/threonine-protein kinase 4 (EC 2.7.11.1) (Mammalian STE20-like protein kinase 1) (MST-1) (STE20-like kinase MST1) (Serine/threonine-protein kinase Krs-2) [Cleaved into: Serine/threonine-protein kinase 4 37kDa subunit (MST1/N); Serine/threonine-protein kinase 4 18kDa subunit (MST1/C)]	35000	86	4300	50.2	Cargo A	Both	NESdbH	55.63		A1	1952
PHAX_HUMAN	Phosphorylated adapter RNA export protein (RNA U small nuclear RNA export adapter protein)	14000	86	1800	20.4	Cargo A	Both		44.402		A1	3983
SRP54_HUMAN	Signal recognition particle 54 kDa protein (SRP54)	5900	86	730	8.45	Cargo A	Both		55.704		A1	1606
HDAC3_HUMAN	Histone deacetylase 3 (HD3) (EC 3.5.1.98) (RPD3-2) (SMAP45)	1100	86	130	1.49	Cargo A	Nucleus	BioGrid	48.847		A1	273
PDD2L_HUMAN	Programmed cell death protein 2-like	21000	85	2600	30.6	Cargo A		Thakar&Karaca	39.416		A1	3673
ZNHI2_HUMAN	Zinc finger HIT domain-containing protein 2 (Protein FON)	13000	83	1600	19.5	Cargo A		Thakar&Karaca	42.883		A1	4427
MEF2D_HUMAN	Myocyte-specific enhancer factor 2D	940	83	120	1.38	Cargo A	Nucleus		55.113		A1	2145
RIPK1_HUMAN	Receptor-interacting serine/threonine-protein kinase 1 (EC 2.7.11.1) (Cell death protein RIP) (Receptor-interacting protein 1) (RIP-1) (Serine/threonine-protein kinase RIP)	990	79	3700	47	Cargo A	Cytoplasm		75.93		A1	2024
PPM1B_HUMAN	Protein phosphatase 1B (EC 3.1.3.16) (Protein phosphatase 2C isoform beta) (PP2C-beta)	2100	79	640	8.08	Cargo A	Cytoplasm		52.642		A1	496
KEAP1_HUMAN	Kelch-like ECH-associated protein 1 (Cytosolic inhibitor of Nrf2) (INrf2) (Kelch-like protein 19)	1800	77	220	2.8	Cargo A	Both	NESdbH, BioGrid	69.666		A1	2079
CNOT2_HUMAN	CCR4-NOT transcription complex subunit 2 (CCR4-associated factor 2)	1000	77	120	1.59	Cargo A	Both		59.737		A1	4307
IQEC1_HUMAN	IQ motif and SEC7 domain-containing protein 1 (ADP-ribosylation factors guanine nucleotide-exchange protein 100) (ADP-ribosylation factors guanine nucleotide-exchange protein 2) (Brefeldin-resistant Arf-GEF 2 protein)	540	77	66	0.855	Cargo A	Both		108.31		A1	2540
SEPT6_HUMAN	Septin-6	4600	76	560	7.39	Cargo A	Cytoplasm		48.872		A1	2078
AP3S2_HUMAN	AP-3 complex subunit sigma-2 (AP-3 complex subunit sigma-3B) (Adaptor-related protein complex 3 subunit sigma-2) (Sigma-3B-adaptin) (Sigma3B-adaptin) (Sigma-adaptin 3b)	840	76	100	1.34	Cargo A	Cytoplasm		22.017		A1	1588
ZYX_HUMAN	Zyxin (Zyxin-2)	2500	74	15000	200	Cargo A	Both	NESdbO, Thakar&Karaca	61.277		A1	2268
GMIP_HUMAN	GEM-interacting protein (GMIP)	1900	72	230	3.19	Cargo A			106.68		A1	4328
AP4M1_HUMAN	AP-4 complex subunit mu-1 (AP-4 adaptor complex mu subunit) (Adaptor-related protein complex 4 subunit mu-1) (Mu subunit of AP-4) (Mu-adaptin-related protein 2) (mu-ARP2) (Mu4-adaptin) (mu4)	1600	72	200	2.79	Cargo A	Cytoplasm		49.976		A1	127
PAXI_HUMAN	Paxillin	5200	71	2800	39.1	Cargo A	Cytoplasm	NESdbH, BioGrid, Thakar&Karaca	64.505		A1	1368
AGFG2_HUMAN	Arf-GAP domain and FG repeat-containing protein 2 (HIV-1 Rev-binding protein-like protein) (Rev/Rex activation domain-binding protein related) (RAB-R)	1000	71	120	1.72	Cargo A			48.962		A1	573
RL24_HUMAN	60S ribosomal protein L24 (60S ribosomal protein L30)	4900	70	600	8.55	Cargo A			17.779		A1	1767
CC124_HUMAN	Coiled-coil domain-containing protein 124	710	69	87	1.27	Cargo A	Cytoplasm	Thakar&Karaca	25.835		A1	3375
HAUS3_HUMAN	HAUS augmin-like complex subunit 3	660	69	80	1.17	Cargo A	Cytoplasm		69.65		A1	2526
GBB1_HUMAN	Guanine nucleotide-binding protein G(I)/G(S)/G(T) subunit beta-1 (Transducin beta chain 1)	1000	68	120	1.78	Cargo A			37.377		A1	1694
GOGA2_HUMAN	Golgin subfamily A member 2 (130 kDa cis-Golgi matrix protein) (GM130) (GM130 autoantigen) (Golgin-95)	820	68	100	1.46	Cargo A	Cytoplasm		113.08		A1	1890
AP3M1_HUMAN	AP-3 complex subunit mu-1 (AP-3 adaptor complex mu3A subunit) (Adaptor-related protein complex 3 subunit mu-1) (Mu-adaptin 3A) (Mu3A-adaptin)	34000	67	4100	61.6	Cargo A	Cytoplasm		46.939		A1	4636
SC23B_HUMAN	Protein transport protein Sec23B (SEC23-related protein B)	900	67	1500	22.2	Cargo A	Cytoplasm		86.478		A1	2228
TENS4_HUMAN	Tensin-4 (C-terminal tensin-like protein)	1700	67	210	3.11	Cargo A	Cytoplasm		76.763	ER	A1	2944
APC5_HUMAN	Anaphase-promoting complex subunit 5 (APC5) (Cyclosome subunit 5)	1000	67	130	1.89	Cargo A		Thakar&Karaca	85.076		A1	4467
TBC17_HUMAN	TBC1 domain family member 17	7500	66	910	13.8	Cargo A	Cytoplasm		72.727		A1	4022
IKBE_HUMAN	NF-kappa-B inhibitor epsilon (NF-kappa-BIE) (I-kappa-B-epsilon) (IkB-E) (IkB-epsilon) (IkappaBepsilon)	2400	66	290	4.46	Cargo A	Cytoplasm	NESdbH	52.863		A1	130
TBK1_HUMAN	Serine/threonine-protein kinase TBK1 (EC 2.7.11.1) (NF-kappa-B-activating kinase) (T2K) (TANK-binding kinase 1)	12000	63	1400	22.4	Cargo A	Cytoplasm		83.641		A1	4417
AP1G2_HUMAN	AP-1 complex subunit gamma-like 2 (Gamma2-adaptin) (G2ad)	1800	63	220	3.51	Cargo A	Cytoplasm		87.116		A1	511
ZC21A_HUMAN	Zinc finger C2HC domain-containing protein 1A	720	62	87	1.41	Cargo A			35.092		A1	3456
LPIN1_HUMAN	Phosphatidate phosphatase LPIN1 (EC 3.1.3.4) (Lipin-1)	1200	61	140	2.36	Cargo A	Both		98.663		A1	2133
GLYG_HUMAN	Glycogenin-1 (GN-1) (GN1) (EC 2.4.1.186)	12000	60	20000	339	Cargo A			37.478		A1	1337
WDR70_HUMAN	WD repeat-containing protein 70	7800	60	950	15.8	Cargo A			73.2		A1	4218
EDC3_HUMAN	Enhancer of mRNA-decapping protein 3 (LSM16 homolog) (YjeF N-terminal domain-containing protein 2) (YjeF_N2) (hYjeF_N2) (YjeF domain-containing protein 1)	4900	59	600	10.1	Cargo A	Cytoplasm		56.077		A1	3427
PERQ2_HUMAN	PERQ amino acid-rich with GYF domain-containing protein 2 (GRB10-interacting GYF protein 2) (Trinucleotide repeat-containing gene 15 protein)	1400	59	170	2.87	Cargo A		Thakar&Karaca	150.07		A1	2643
MKNK1_HUMAN	MAP kinase-interacting serine/threonine-protein kinase 1 (EC 2.7.11.1) (MAP kinase signal-integrating kinase 1) (MAPK signal-integrating kinase 1) (Mnk1)	1800	57	220	3.8	Cargo A	Both		47.402		A1	3717
SGT1_HUMAN	Protein SGT1 (hSGT1) (Protein ecdysoneless homolog) (Suppressor of GCR2)	17000	56	2100	38.1	Cargo A	Both		72.757		A1	656
PAF1_HUMAN	RNA polymerase II-associated factor 1 homolog (hPAF1) (Pancreatic differentiation protein 2)	5200	56	640	11.5	Cargo A	Nucleus		59.975		A1	3002
DDX6_HUMAN	Probable ATP-dependent RNA helicase DDX6 (EC 3.6.4.13) (ATP-dependent RNA helicase p54) (DEAD box protein 6) (Oncogene RCK)	4700	56	580	10.2	Cargo A	Cytoplasm	NESdbO	54.416		A1	1048
ZO3_HUMAN	Tight junction protein ZO-3 (Tight junction protein 3) (Zona occludens protein 3) (Zonula occludens protein 3)	520	56	63	1.12	Cargo A	Cytoplasm		101.4		A1	569
EI2BD_HUMAN	Translation initiation factor eIF-2B subunit delta (eIF-2B GDP-GTP exchange factor subunit delta)	16000	55	2000	35.3	Cargo A			57.557		A1	4435
SNX17_HUMAN	Sorting nexin-17	5800	55	700	12.8	Cargo A	Cytoplasm		52.901		A1	2174
DGKZ_HUMAN	Diacylglycerol kinase zeta (DAG kinase zeta) (EC 2.7.1.107) (Diglyceride kinase zeta) (DGK-zeta)	1600	55	190	3.51	Cargo A	Both	NESdbO	103.98		A1	2031
CLSPN_HUMAN	Claspin (hClaspin)	1100	55	140	2.5	Cargo A	Nucleus		151.09		A1	4034
CDK17_HUMAN	Cyclin-dependent kinase 17 (EC 2.7.11.22) (Cell division protein kinase 17) (PCTAIRE-motif protein kinase 2) (Serine/threonine-protein kinase PCTAIRE-2)	2800	54	340	6.27	Cargo A			59.53		A1	1788
BL1S5_HUMAN	Biogenesis of lysosome-related organelles complex 1 subunit 5 (BLOC-1 subunit 5) (Protein Muted homolog)	1300	54	160	2.96	Cargo A			21.609		A1	3124
ESPL1_HUMAN	Separin (EC 3.4.22.49) (Caspase-like protein ESPL1) (Extra spindle poles-like 1 protein) (Separase)	650	54	79	1.47	Cargo A	Both		233.17		A1	2125
SNP29_HUMAN	Synaptosomal-associated protein 29 (SNAP-29) (Soluble 29 kDa NSF attachment protein) (Vesicle-membrane fusion protein SNAP-29)	13000	53	1600	30.9	Cargo A	Cytoplasm		28.97		A1	635
EPN1_HUMAN	Epsin-1 (EH domain-binding mitotic phosphoprotein) (EPS-15-interacting protein 1)	8800	52	1100	20.8	Cargo A	Both		69.039		A1	4793
PHLP_HUMAN	Phosducin-like protein (PHLP)	5500	52	670	12.9	Cargo A			34.281		A1	1996
IF4E2_HUMAN	Eukaryotic translation initiation factor 4E type 2 (eIF-4E type 2) (eIF4E type 2) (Eukaryotic translation initiation factor 4E homologous protein) (Eukaryotic translation initiation factor 4E-like 3) (eIF4E-like protein 4E-LP) (mRNA cap-binding protein 4EHP) (mRNA cap-binding protein type 3)	3200	52	390	7.58	Cargo A		Thakar&Karaca	28.362		A1	400
AP4B1_HUMAN	AP-4 complex subunit beta-1 (AP-4 adaptor complex subunit beta) (Adaptor-related protein complex 4 subunit beta-1) (Beta subunit of AP-4) (Beta4-adaptin)	1000	52	130	2.41	Cargo A	Cytoplasm		83.259		A1	4784
HIRP3_HUMAN	HIRA-interacting protein 3	880	52	110	2.05	Cargo A	Nucleus		27.612		A1	3763
NCBP1_HUMAN	Nuclear cap-binding protein subunit 1 (80 kDa nuclear cap-binding protein) (CBP80) (NCBP 80 kDa subunit)	8900	51	1100	21.4	Cargo A	Both		91.838		A1	1905
DIAP3_HUMAN	Protein diaphanous homolog 3 (Diaphanous-related formin-3) (DRF3) (MDia2)	750	51	91	1.79	Cargo A	Cytoplasm	NESdbO, Thakar&Karaca	136.92		A1	4160
AGFG1_HUMAN	Arf-GAP domain and FG repeat-containing protein 1 (HIV-1 Rev-binding protein) (Nucleoporin-like protein RIP) (Rev-interacting protein) (Rev/Rex activation domain-binding protein)	8300	50	1000	20.2	Cargo A	Both		54.181		A1	1488
PDPK1_HUMAN	3-phosphoinositide-dependent protein kinase 1 (hPDK1) (EC 2.7.11.1)	1900	50	230	4.61	Cargo A	Both	NESdbO	63.151		A1	279
AFTIN_HUMAN	Aftiphilin	3000	49	360	7.48	Cargo A	Cytoplasm		99.37		A1	2623
SRP72_HUMAN	Signal recognition particle subunit SRP72 (SRP72) (Signal recognition particle 72 kDa protein)	3200	48	400	8.22	Cargo A	Cytoplasm		74.605		A1	532
NACC1_HUMAN	Nucleus accumbens-associated protein 1 (NAC-1) (BTB/POZ domain-containing protein 14B)	1800	48	220	4.62	Cargo A	Both		57.258		A1	3552
TCOF_HUMAN	Treacle protein (Treacher Collins syndrome protein)	1000	48	120	2.6	Cargo A	Nucleus		152.2		A1	2004
EI2BE_HUMAN	Translation initiation factor eIF-2B subunit epsilon (eIF-2B GDP-GTP exchange factor subunit epsilon)	11000	47	1400	29	Cargo A			80.379		A1	1967
OCRL_HUMAN	Inositol polyphosphate 5-phosphatase OCRL-1 (EC 3.1.3.36) (Lowe oculocerebrorenal syndrome protein)	3600	47	440	9.33	Cargo A	Cytoplasm		104.2		A1	1814
CI040_HUMAN	Uncharacterized protein C9orf40	650	47	80	1.7	Cargo A			21.063		A1	2911
EHBP1_HUMAN	EH domain-binding protein 1	3700	46	450	9.74	Cargo A	Cytoplasm		132.32		A1	3052
UBAP1_HUMAN	Ubiquitin-associated protein 1 (UBAP-1) (Nasopharyngeal carcinoma-associated gene 20 protein)	1300	46	160	3.44	Cargo A	Cytoplasm		48.246		A1	4289
WWC2_HUMAN	Protein WWC2 (BH-3-only member B) (WW domain-containing protein 2)	780	46	95	2.07	Cargo A			133.89		A1	2535
DRG2_HUMAN	Developmentally-regulated GTP-binding protein 2 (DRG-2)	25000	45	3100	68.9	Cargo A	Cytoplasm		40.746		A1	1546
TOM1_HUMAN	Target of Myb protein 1	4100	42	500	11.9	Cargo A	Cytoplasm		53.874		A1	416
ARFG3_HUMAN	ADP-ribosylation factor GTPase-activating protein 3 (ARF GAP 3)	1100	42	130	3.13	Cargo A	Cytoplasm		51.989		A1	4075
TSTD2_HUMAN	Thiosulfate sulfurtransferase/rhodanese-like domain-containing protein 2 (Rhodanese domain-containing protein 2)	4500	41	550	13.4	Cargo A			58.262		A1	2457
WDR54_HUMAN	WD repeat-containing protein 54	540	41	66	1.6	Cargo A			35.891		A1	4002
TRIP6_HUMAN	Thyroid receptor-interacting protein 6 (TR-interacting protein 6) (TRIP-6) (Opa-interacting protein 1) (OIP-1) (Zyxin-related protein 1) (ZRP-1)	24000	40	2900	73.2	Cargo A	Both	NESdbO	50.287		A1	2250
DAB2_HUMAN	Disabled homolog 2 (DOC-2) (Differentially-expressed protein 2)	19000	40	2300	57.5	Cargo A	Cytoplasm		82.447		A1	1777
TENS3_HUMAN	Tensin-3 (Tensin-like SH2 domain-containing protein 1) (Tumor endothelial marker 6)	840	40	640	15.8	Cargo A	Cytoplasm		155.26		A1	2525
RABL6_HUMAN	Rab-like protein 6 (GTP-binding protein Parf) (Partner of ARF) (Rab-like protein 1) (RBEL1)	4800	40	590	14.5	Cargo A	Both		79.548		A1	2353
LIMD1_HUMAN	LIM domain-containing protein 1	3900	40	480	12	Cargo A	Both		72.189		A1	4408
PJA2_HUMAN	E3 ubiquitin-protein ligase Praja-2 (Praja2) (EC 6.3.2.-) (RING finger protein 131)	3100	40	380	9.66	Cargo A	Cytoplasm		76.09		A1	287
PEX19_HUMAN	Peroxisomal biogenesis factor 19 (33 kDa housekeeping protein) (Peroxin-19) (Peroxisomal farnesylated protein)	2900	40	360	8.8	Cargo A	Cytoplasm		32.806		A1	1254
HAUS6_HUMAN	HAUS augmin-like complex subunit 6	1300	40	150	3.88	Cargo A	Cytoplasm		108.62		A1	2740
DDX5_HUMAN	Probable ATP-dependent RNA helicase DDX5 (EC 3.6.4.13) (DEAD box protein 5) (RNA helicase p68)	1100	40	130	3.35	Cargo A	Nucleus		69.147		A1	935
ABTB2_HUMAN	Ankyrin repeat and BTB/POZ domain-containing protein 2	1000	40	120	3.08	Cargo A			113.65		A1	3010
IKBA_HUMAN	NF-kappa-B inhibitor alpha (I-kappa-B-alpha) (IkB-alpha) (IkappaBalpha) (Major histocompatibility complex enhancer-binding protein MAD3)	730	39	1900	48.8	Cargo A	Both	NESdbH	35.609		A1	1045
PP4R1_HUMAN	Serine/threonine-protein phosphatase 4 regulatory subunit 1	13000	39	1500	39.5	Cargo A			105.19		A1	3149
CDC73_HUMAN	Parafibromin (Cell division cycle protein 73 homolog) (Hyperparathyroidism 2 protein)	9400	39	1100	29.6	Cargo A	Nucleus		60.576		A1	2569
ABCF1_HUMAN	ATP-binding cassette sub-family F member 1 (ATP-binding cassette 50) (TNF-alpha-stimulated ABC protein)	7000	39	860	21.8	Cargo A	Both		95.925		A1	3055
RWDD4_HUMAN	RWD domain-containing protein 4 (Protein FAM28A)	4500	39	550	14.2	Cargo A		Thakar&Karaca	21.25		A1	2561
ZSWM8_HUMAN	Zinc finger SWIM domain-containing protein 8	1100	39	130	3.45	Cargo A			196.43		A1	33
RAPH1_HUMAN	Ras-associated and pleckstrin homology domains-containing protein 1 (RAPH1) (Amyotrophic lateral sclerosis 2 chromosomal region candidate gene 18 protein) (Amyotrophic lateral sclerosis 2 chromosomal region candidate gene 9 protein) (Lamellipodin) (Proline-rich EVH1 ligand 2) (PREL-2) (Protein RMO1)	3700	38	450	11.8	Cargo A	Cytoplasm		135.25		A1	2673
SC24D_HUMAN	Protein transport protein Sec24D (SEC24-related protein D)	2800	38	340	8.88	Cargo A	Cytoplasm		113.01		A1	544
XPA_HUMAN	DNA repair protein complementing XP-A cells (Xeroderma pigmentosum group A-complementing protein)	1500	38	190	5.01	Cargo A	Nucleus		31.368		A1	1005
VKIND_HUMAN	Protein very KIND (Cerebral protein 9) (KIND domain-containing protein 1) (Kinase non-catalytic C-lobe domain-containing protein 1) (Ras-GEF domain-containing family member 2)	1100	38	130	3.55	Cargo A			148.55		A1	2685
SQSTM_HUMAN	Sequestosome-1 (EBI3-associated protein of 60 kDa) (EBIAP) (p60) (Phosphotyrosine-independent ligand for the Lck SH2 domain of 62 kDa) (Ubiquitin-binding protein p62)	950	37	7900	212	Cargo A	Both	Thakar&Karaca	47.687		A1	2019
STAT2_HUMAN	Signal transducer and activator of transcription 2 (p113)	6000	36	730	20.5	Cargo A	Both		97.456		A1	1490
TRI26_HUMAN	Tripartite motif-containing protein 26 (Acid finger protein) (AFP) (RING finger protein 95) (Zinc finger protein 173)	2000	36	240	6.69	Cargo A			62.165		A1	1933
LAS1L_HUMAN	Ribosomal biogenesis protein LAS1L (Protein LAS1 homolog)	1200	36	140	3.98	Cargo A	Both		81.242		A1	4724
CD37L_HUMAN	Hsp90 co-chaperone Cdc37-like 1 (Hsp90-associating relative of Cdc37)	5600	35	680	19.6	Cargo A	Cytoplasm	BioGrid	38.834		A1	2697
C2D1A_HUMAN	Coiled-coil and C2 domain-containing protein 1A (Akt kinase-interacting protein 1) (Five prime repressor element under dual repression-binding protein 1) (FRE under dual repression-binding protein 1) (Freud-1) (Putative NF-kappa-B-activating protein 023N)	5400	35	660	18.8	Cargo A	Both		104.06		A1	2573
SEPT9_HUMAN	Septin-9 (MLL septin-like fusion protein MSF-A) (MLL septin-like fusion protein) (Ovarian/Breast septin) (Ov/Br septin) (Septin D1)	4800	34	590	17.1	Cargo A	Cytoplasm		65.401		A1	4418
SPN90_HUMAN	NCK-interacting protein with SH3 domain (54 kDa VacA-interacting protein) (54 kDa vimentin-interacting protein) (VIP54) (90 kDa SH3 protein interacting with Nck) (AF3p21) (Dia-interacting protein 1) (DIP-1) (Diaphanous protein-interacting protein) (SH3 adapter protein SPIN90) (WASP-interacting SH3-domain protein) (WISH) (Wiskott-Aldrich syndrome protein-interacting protein)	3700	34	450	13.2	Cargo A	Both		78.959		A1	4308
SYNRG_HUMAN	Synergin gamma (AP1 subunit gamma-binding protein 1) (Gamma-synergin)	3600	34	440	13	Cargo A	Cytoplasm		140.65		A1	4541
RAF1_HUMAN	RAF proto-oncogene serine/threonine-protein kinase (EC 2.7.11.1) (Proto-oncogene c-RAF) (cRaf) (Raf-1)	1200	34	320	9.52	Cargo A	Both		73.051		A1	699
GPSM1_HUMAN	G-protein-signaling modulator 1 (Activator of G-protein signaling 3)	970	34	120	3.48	Cargo A	Cytoplasm		72.135		A1	2852
SHRM1_HUMAN	Protein Shroom1 (Apical protein 2)	840	34	100	3	Cargo A	Cytoplasm		90.785		A1	2320
CDC20_HUMAN	Cell division cycle protein 20 homolog (p55CDC)	680	34	83	2.43	Cargo A	Cytoplasm		54.722		A1	1926
A16L1_HUMAN	Autophagy-related protein 16-1 (APG16-like 1)	7500	33	910	27.9	Cargo A	Cytoplasm		66.295		A1	2522
CEP97_HUMAN	Centrosomal protein of 97 kDa (Cep97) (Leucine-rich repeat and IQ domain-containing protein 2)	4600	33	570	17.4	Cargo A	Cytoplasm		96.98		A1	2878
SRP68_HUMAN	Signal recognition particle subunit SRP68 (SRP68) (Signal recognition particle 68 kDa protein)	1400	33	410	12.3	Cargo A	Both		70.729		A1	4415
MYPN_HUMAN	Myopalladin (145 kDa sarcomeric protein)	730	33	350	10.9	Cargo A	Both		145.26		A1	2780
STRN3_HUMAN	Striatin-3 (Cell cycle autoantigen SG2NA) (S/G2 antigen)	1800	33	220	6.56	Cargo A	Cytoplasm		77.744		A1	1950
NOLC1_HUMAN	Nucleolar and coiled-body phosphoprotein 1 (140 kDa nucleolar phosphoprotein) (Nopp140) (Hepatitis C virus NS5A-transactivated protein 13) (HCV NS5A-transactivated protein 13) (Nucleolar 130 kDa protein) (Nucleolar phosphoprotein p130)	1500	33	190	5.81	Cargo A	Both		73.602		A1	2152
HNRPC_HUMAN	Heterogeneous nuclear ribonucleoproteins C1/C2 (hnRNP C1/C2)	520	33	64	1.91	Cargo A	Nucleus		32.337		A1	769
STK10_HUMAN	Serine/threonine-protein kinase 10 (EC 2.7.11.1) (Lymphocyte-oriented kinase)	1500	32	180	5.58	Cargo A	Cytoplasm		112.13		A1	538
KPCD2_HUMAN	Serine/threonine-protein kinase D2 (EC 2.7.11.13) (nPKC-D2)	570	32	69	2.17	Cargo A	Both		96.749		A1	3817
AP3B1_HUMAN	AP-3 complex subunit beta-1 (Adaptor protein complex AP-3 subunit beta-1) (Adaptor-related protein complex 3 subunit beta-1) (Beta-3A-adaptin) (Clathrin assembly protein complex 3 beta-1 large chain)	4800	31	2600	84.5	Cargo A	Cytoplasm		121.32		A1	129
AP1M1_HUMAN	AP-1 complex subunit mu-1 (AP-mu chain family member mu1A) (Adaptor protein complex AP-1 subunit mu-1) (Adaptor-related protein complex 1 subunit mu-1) (Clathrin assembly protein complex 1 mu-1 medium chain 1) (Clathrin coat assembly protein AP47) (Clathrin coat-associated protein AP47) (Golgi adaptor HA1/AP1 adaptin mu-1 subunit) (Mu-adaptin 1) (Mu1A-adaptin)	18000	31	2200	69.7	Cargo A	Cytoplasm		48.586		A1	3781
GPN3_HUMAN	GPN-loop GTPase 3 (ATP-binding domain 1 family member C)	7000	31	860	28.2	Cargo A			32.761		A1	4429
SC24C_HUMAN	Protein transport protein Sec24C (SEC24-related protein C)	6500	31	800	25.4	Cargo A	Cytoplasm		118.32		A1	1525
ZNFX1_HUMAN	NFX1-type zinc finger-containing protein 1	710	31	87	2.84	Cargo A			220.22		A1	4349
HAUS2_HUMAN	HAUS augmin-like complex subunit 2 (Centrosomal protein of 27 kDa) (Cep27)	610	31	74	2.42	Cargo A	Cytoplasm		26.933		A1	4209
SEPT2_HUMAN	Septin-2 (Neural precursor cell expressed developmentally down-regulated protein 5) (NEDD-5)	11000	30	1400	46	Cargo A	Cytoplasm		41.487		A1	2166
YJ005_HUMAN	Uncharacterized protein FLJ45252	4900	30	600	19.8	Cargo A			37.976		A1	2656
EPS15_HUMAN	Epidermal growth factor receptor substrate 15 (Protein Eps15) (Protein AF-1p)	4000	30	490	16.4	Cargo A	Cytoplasm	NESdbH	98.655		A1	1288
BCR_HUMAN	Breakpoint cluster region protein (EC 2.7.11.1) (Renal carcinoma antigen NY-REN-26)	3300	30	400	13.3	Cargo A	Cytoplasm		142.82		A1	844
HIF1N_HUMAN	Hypoxia-inducible factor 1-alpha inhibitor (EC 1.14.11.30) (EC 1.14.11.n4) (Factor inhibiting HIF-1) (FIH-1) (Hypoxia-inducible factor asparagine hydroxylase)	1500	30	180	6.17	Cargo A	Both		40.285		A1	4226
RL23A_HUMAN	60S ribosomal protein L23a	790	30	97	3.19	Cargo A			17.695		A1	1682
EIF3E_HUMAN	Eukaryotic translation initiation factor 3 subunit E (eIF3e) (Eukaryotic translation initiation factor 3 subunit 6) (Viral integration site protein INT-6 homolog) (eIF-3 p48)	1600	29	200	6.69	Cargo A	Both		52.22		A1	1592
BL1S4_HUMAN	Biogenesis of lysosome-related organelles complex 1 subunit 4 (BLOC-1 subunit 4) (Protein cappuccino homolog)	930	29	110	3.93	Cargo A	Cytoplasm		23.351		A1	4178
IF2P_HUMAN	Eukaryotic translation initiation factor 5B (eIF-5B) (Translation initiation factor IF-2)	10000	28	1300	44.8	Cargo A	Cytoplasm		138.83		A1	421
WIPI4_HUMAN	WD repeat domain phosphoinositide-interacting protein 4 (WIPI-4) (WD repeat-containing protein 45)	1300	28	620	22.5	Cargo A			39.867		A1	4695
CNOT3_HUMAN	CCR4-NOT transcription complex subunit 3 (CCR4-associated factor 3) (Leukocyte receptor cluster member 2)	850	28	100	3.76	Cargo A	Both		81.871		A1	457
COPD_HUMAN	Coatomer subunit delta (Archain) (Delta-coat protein) (Delta-COP)	6800	27	2400	88.5	Cargo A	Cytoplasm		57.21		A1	1352
HBS1L_HUMAN	HBS1-like protein (ERFS)	5300	27	650	24.5	Cargo A			75.472		A1	4692
DCAF8_HUMAN	DDB1- and CUL4-associated factor 8 (WD repeat-containing protein 42A)	4900	27	590	21.6	Cargo A	Both	NESdbH, BioGrid	66.851		A1	2465
ADDA_HUMAN	Alpha-adducin (Erythrocyte adducin subunit alpha)	3500	27	430	15.7	Cargo A	Cytoplasm		80.954		A1	1198
MALT1_HUMAN	Mucosa-associated lymphoid tissue lymphoma translocation protein 1 (EC 3.4.22.-) (MALT lymphoma-associated translocation) (Paracaspase)	2000	27	250	9.33	Cargo A	Both		92.271		A1	4395
IF4G2_HUMAN	Eukaryotic translation initiation factor 4 gamma 2 (eIF-4-gamma 2) (eIF-4G 2) (eIF4G 2) (Death-associated protein 5) (DAP-5) (p97)	1200	27	150	5.64	Cargo A			102.36		A1	1744
COPG2_HUMAN	Coatomer subunit gamma-2 (Gamma-2-coat protein) (Gamma-2-COP)	1200	27	140	5.26	Cargo A	Cytoplasm		97.621		A1	4367
IF2A_HUMAN	Eukaryotic translation initiation factor 2 subunit 1 (Eukaryotic translation initiation factor 2 subunit alpha) (eIF-2-alpha) (eIF-2A) (eIF-2alpha)	33000	26	4000	155	Cargo A	Cytoplasm		36.112		A1	722
GPN1_HUMAN	GPN-loop GTPase 1 (EC 3.6.5.-) (MBD2-interacting protein) (MBDin) (RNAPII-associated protein 4) (XPA-binding protein 1)	3400	26	1600	62.6	Cargo A	Both	NESdbH	41.74		A1	4064
AP3D1_HUMAN	AP-3 complex subunit delta-1 (AP-3 complex subunit delta) (Adaptor-related protein complex 3 subunit delta-1) (Delta-adaptin)	10000	26	1300	49	Cargo A	Cytoplasm		130.16		A1	181
AP3S1_HUMAN	AP-3 complex subunit sigma-1 (AP-3 complex subunit sigma-3A) (Adaptor-related protein complex 3 subunit sigma-1) (Clathrin-associated/assembly/adaptor protein, small 3) (Sigma-3A-adaptin) (Sigma3A-adaptin) (Sigma-adaptin 3a)	11000	26	1300	49.5	Cargo A	Cytoplasm		21.732		A1	3230
IRS2_HUMAN	Insulin receptor substrate 2 (IRS-2)	1400	26	920	35.9	Cargo A	Cytoplasm		137.33		A1	4713
AAK1_HUMAN	AP2-associated protein kinase 1 (EC 2.7.11.1) (Adaptor-associated kinase 1)	3900	26	480	18.7	Cargo A	Cytoplasm		103.88		A1	2317
CLAP2_HUMAN	CLIP-associating protein 2 (Cytoplasmic linker-associated protein 2) (Protein Orbit homolog 2) (hOrbit2)	2600	26	320	12.2	Cargo A	Cytoplasm		141.13		A1	442
GSTCD_HUMAN	Glutathione S-transferase C-terminal domain-containing protein	2200	26	270	10.4	Cargo A			71.078		A1	3057
PI4KB_HUMAN	Phosphatidylinositol 4-kinase beta (PI4K-beta) (PI4Kbeta) (PtdIns 4-kinase beta) (EC 2.7.1.67) (NPIK) (PI4K92)	1500	26	180	6.85	Cargo A	Cytoplasm		89.806		A1	4369
ZNHI3_HUMAN	Zinc finger HIT domain-containing protein 3 (HNF-4a coactivator) (Thyroid hormone receptor interactor 3) (Thyroid receptor-interacting protein 3) (TR-interacting protein 3) (TRIP-3)	740	26	91	3.45	Cargo A			17.607		A1	2247
RICTR_HUMAN	Rapamycin-insensitive companion of mTOR (AVO3 homolog) (hAVO3)	570	26	70	2.64	Cargo A			195.01		A1	2618
SYSC_HUMAN	Serine--tRNA ligase, cytoplasmic (EC 6.1.1.11) (Seryl-tRNA synthetase) (SerRS) (Seryl-tRNA(Ser/Sec) synthetase)	120000	25	15000	602	Cargo A	Cytoplasm		58.777		A1	1392
WASH3_HUMAN	Putative WAS protein family homolog 3 (Protein FAM39DP)	1700	25	200	8.23	Cargo A	Cytoplasm		49.994		A1	45
WDR92_HUMAN	WD repeat-containing protein 92 (WD repeat-containing protein Monad)	1000	25	130	5.05	Cargo A			39.74		A1	3517
SSH2_HUMAN	Protein phosphatase Slingshot homolog 2 (EC 3.1.3.16) (EC 3.1.3.48) (SSH-like protein 2) (SSH-2L) (hSSH-2L)	720	25	88	3.61	Cargo A	Cytoplasm		158.21		A1	2684
EI2BG_HUMAN	Translation initiation factor eIF-2B subunit gamma (eIF-2B GDP-GTP exchange factor subunit gamma)	14000	24	1700	68.9	Cargo A			50.24		A1	4119
ATG5_HUMAN	Autophagy protein 5 (APG5-like) (Apoptosis-specific protein)	10000	24	1200	52.3	Cargo A	Cytoplasm		32.447		A1	3892
F122B_HUMAN	Protein FAM122B	2700	24	330	13.9	Cargo A			27.209		A1	2721
T2FA_HUMAN	General transcription factor IIF subunit 1 (General transcription factor IIF 74 kDa subunit) (Transcription initiation factor IIF subunit alpha) (TFIIF-alpha) (Transcription initiation factor RAP74)	2600	24	320	13.1	Cargo A	Nucleus		58.24		A1	1189
NCBP2_HUMAN	Nuclear cap-binding protein subunit 2 (20 kDa nuclear cap-binding protein) (Cell proliferation-inducing gene 55 protein) (NCBP 20 kDa subunit) (CBP20) (NCBP-interacting protein 1) (NIP1)	1700	24	210	8.86	Cargo A	Both		18.001		A1	1482
AURKA_HUMAN	Aurora kinase A (EC 2.7.11.1) (Aurora 2) (Aurora/IPL1-related kinase 1) (ARK-1) (Aurora-related kinase 1) (hARK1) (Breast tumor-amplified kinase) (Serine/threonine-protein kinase 15) (Serine/threonine-protein kinase 6) (Serine/threonine-protein kinase aurora-A)	1300	24	160	6.62	Cargo A	Cytoplasm		45.809		A1	224
HAP28_HUMAN	28 kDa heat- and acid-stable phosphoprotein (PDGF-associated protein) (PAP) (PDGFA-associated protein 1) (PAP1)	1300	24	160	6.62	Cargo A			20.63		A1	2009
RBM26_HUMAN	RNA-binding protein 26 (CTCL tumor antigen se70-2) (RNA-binding motif protein 26)	690	24	84	3.47	Cargo A			111.02		A1	2460
SMAD4_HUMAN	Mothers against decapentaplegic homolog 4 (MAD homolog 4) (Mothers against DPP homolog 4) (Deletion target in pancreatic carcinoma 4) (SMAD family member 4) (SMAD 4) (Smad4) (hSMAD4)	610	24	74	3.15	Cargo A	Both	NESdbH	60.438		A1	2016
SYAP1_HUMAN	Synapse-associated protein 1	1200	23	8800	385	Cargo A			39.933		A1	3323
KIBRA_HUMAN	Protein KIBRA (HBeAg-binding protein 3) (Kidney and brain protein) (KIBRA) (WW domain-containing protein 1)	3900	23	470	20.7	Cargo A	Both		125.9		A1	2903
ERC6L_HUMAN	DNA excision repair protein ERCC-6-like (EC 3.6.4.12) (ATP-dependent helicase ERCC6-like) (PLK1-interacting checkpoint helicase) (Tumor antigen BJ-HCC-15)	1800	23	220	9.86	Cargo A	Other		141.1		A1	2322
ZN330_HUMAN	Zinc finger protein 330 (Nucleolar autoantigen 36) (Nucleolar cysteine-rich protein)	670	23	82	3.6	Cargo A	Nucleus		36.201		A1	4686
AP4E1_HUMAN	AP-4 complex subunit epsilon-1 (AP-4 adaptor complex subunit epsilon) (Adaptor-related protein complex 4 subunit epsilon-1) (Epsilon subunit of AP-4) (Epsilon-adaptin)	540	23	65	2.91	Cargo A	Cytoplasm		127.29		A1	4559
NP1L1_HUMAN	Nucleosome assembly protein 1-like 1 (NAP-1-related protein) (hNRP)	380000	22	47000	2120	Cargo A	Nucleus		42.761		A1	1552
COPB_HUMAN	Coatomer subunit beta (Beta-coat protein) (Beta-COP)	11000	22	1300	58.8	Cargo A	Cytoplasm		107.14		A1	1514
DENR_HUMAN	Density-regulated protein (DRP) (Protein DRP1) (Smooth muscle cell-associated protein 3) (SMAP-3)	9000	22	1100	50.8	Cargo A			22.092		A1	327
MB12A_HUMAN	Multivesicular body subunit 12A (CIN85/CD2AP family-binding protein) (ESCRT-I complex subunit MVB12A) (Protein FAM125A)	2700	22	330	15	Cargo A	Both		28.783		A1	3419
RWDD1_HUMAN	RWD domain-containing protein 1 (DRG family-regulatory protein 2)	2700	22	330	15.2	Cargo A			17.082		A1	3928
SHQ1_HUMAN	Protein SHQ1 homolog	550	22	67	3.09	Cargo A	Both		65.124		A1	2603
IF2G_HUMAN	Eukaryotic translation initiation factor 2 subunit 3 (Eukaryotic translation initiation factor 2 subunit gamma X) (eIF-2-gamma X) (eIF-2gX)	67000	21	8200	397	Cargo A			51.109		A1	1260
ENAH_HUMAN	Protein enabled homolog	18000	21	2200	102	Cargo A	Cytoplasm		66.509		A1	3007
COPB2_HUMAN	Coatomer subunit beta' (Beta'-coat protein) (Beta'-COP) (p102)	670	21	1500	72.1	Cargo A	Cytoplasm		102.49		A1	1196
DMD_HUMAN	Dystrophin	4900	21	590	28.8	Cargo A	Cytoplasm	NESdbO	70.749		A1	848
CNOT7_HUMAN	CCR4-NOT transcription complex subunit 7 (EC 3.1.13.4) (BTG1-binding factor 1) (CCR4-associated factor 1) (CAF-1) (Caf1a)	690	21	84	4	Cargo A	Both		32.745		A1	4451
P4HA1_HUMAN	Prolyl 4-hydroxylase subunit alpha-1 (4-PH alpha-1) (EC 1.14.11.2) (Procollagen-proline,2-oxoglutarate-4-dioxygenase subunit alpha-1)	580	21	71	3.34	Cargo A	Cytoplasm		60.966	ER	A1	872
NAF1_HUMAN	H/ACA ribonucleoprotein complex non-core subunit NAF1 (hNAF1)	530	21	64	3.13	Cargo A	Both		41.894		A1	3466
IF5_HUMAN	Eukaryotic translation initiation factor 5 (eIF-5)	19000	20	2300	117	Cargo A			49.222		A1	1544
VASP_HUMAN	Vasodilator-stimulated phosphoprotein (VASP)	15000	20	1900	93.7	Cargo A	Cytoplasm		39.829		A1	1429
COPG1_HUMAN	Coatomer subunit gamma-1 (Gamma-1-coat protein) (Gamma-1-COP)	820	20	1200	57.6	Cargo A	Cytoplasm		97.717		A1	4777
BUB1B_HUMAN	Mitotic checkpoint serine/threonine-protein kinase BUB1 beta (EC 2.7.11.1) (MAD3/BUB1-related protein kinase) (hBUBR1) (Mitotic checkpoint kinase MAD3L) (Protein SSK1)	7100	20	870	43	Cargo A	Both		119.54		A1	398
KC1A_HUMAN	Casein kinase I isoform alpha (CKI-alpha) (EC 2.7.11.1) (CK1)	2700	20	330	16.6	Cargo A	Both		38.914		A1	1363
ATG2A_HUMAN	Autophagy-related protein 2 homolog A	1100	20	290	14.8	Cargo A	Cytoplasm		212.86		A1	2331
DKC1_HUMAN	H/ACA ribonucleoprotein complex subunit 4 (EC 5.4.99.-) (CBF5 homolog) (Dyskerin) (Nopp140-associated protein of 57 kDa) (Nucleolar protein NAP57) (Nucleolar protein family A member 4) (snoRNP protein DKC1)	2100	20	260	13.3	Cargo A	Both		57.673		A1	420
MOCOS_HUMAN	Molybdenum cofactor sulfurase (MCS) (MOS) (MoCo sulfurase) (hMCS) (EC 2.8.1.9) (Molybdenum cofactor sulfurtransferase)	1000	19	2600	134	Cargo A			98.119		A1	3410
TS101_HUMAN	Tumor susceptibility gene 101 protein (ESCRT-I complex subunit TSG101)	7800	19	960	50.9	Cargo A	Both	BioGrid	43.944		A1	3626
RPB3_HUMAN	DNA-directed RNA polymerase II subunit RPB3 (RNA polymerase II subunit 3) (RNA polymerase II subunit B3) (DNA-directed RNA polymerase II 33 kDa polypeptide) (RPB33) (DNA-directed RNA polymerase II subunit C) (RPB31)	6200	19	760	39.7	Cargo A	Nucleus		31.441		A1	955
IRF3_HUMAN	Interferon regulatory factor 3 (IRF-3)	5800	19	710	37.2	Cargo A	Both	NESdbH	47.219		A1	2119
ATG12_HUMAN	Ubiquitin-like protein ATG12 (Autophagy-related protein 12) (APG12-like)	5300	19	640	34.2	Cargo A	Cytoplasm		15.113		A1	541
RS2_HUMAN	40S ribosomal protein S2 (40S ribosomal protein S4) (Protein LLRep3)	3500	19	430	22.8	Cargo A			31.324		A1	907
TGS1_HUMAN	Trimethylguanosine synthase (EC 2.1.1.-) (CLL-associated antigen KW-2) (Cap-specific guanine-N2 methyltransferase) (Hepatocellular carcinoma-associated antigen 137) (Nuclear receptor coactivator 6-interacting protein) (PRIP-interacting protein with methyltransferase motif) (PIMT) (PIPMT)	860	19	100	5.5	Cargo A	Both	NESdbH	96.619		A1	3558
ATG3_HUMAN	Ubiquitin-like-conjugating enzyme ATG3 (EC 6.3.2.-) (Autophagy-related protein 3) (APG3-like) (hApg3) (Protein PC3-96)	45000	18	5500	304	Cargo A	Cytoplasm		35.864		A1	4164
TBC15_HUMAN	TBC1 domain family member 15 (GTPase-activating protein RAB7) (GAP for RAB7) (Rab7-GAP)	3100	18	2800	157	Cargo A	Cytoplasm		77.394		A1	3108
UBA5_HUMAN	Ubiquitin-like modifier-activating enzyme 5 (Ubiquitin-activating enzyme 5) (ThiFP1) (UFM1-activating enzyme) (Ubiquitin-activating enzyme E1 domain-containing protein 1)	22000	18	2600	146	Cargo A	Both		44.863		A1	3849
AP2B1_HUMAN	AP-2 complex subunit beta (AP105B) (Adaptor protein complex AP-2 subunit beta) (Adaptor-related protein complex 2 subunit beta) (Beta-2-adaptin) (Beta-adaptin) (Clathrin assembly protein complex 2 beta large chain) (Plasma membrane adaptor HA2/AP2 adaptin beta subunit)	3100	18	380	21.3	Cargo A	Cytoplasm		104.55		A1	1707
RPB1_HUMAN	DNA-directed RNA polymerase II subunit RPB1 (RNA polymerase II subunit B1) (EC 2.7.7.6) (DNA-directed RNA polymerase II subunit A) (DNA-directed RNA polymerase III largest subunit) (RNA-directed RNA polymerase II subunit RPB1) (EC 2.7.7.48)	2500	18	300	16.7	Cargo A	Nucleus		217.17		A1	1028
HTR5B_HUMAN	HEAT repeat-containing protein 5B	2100	18	260	14.1	Cargo A			224.3		A1	4347
COPA_HUMAN	Coatomer subunit alpha (Alpha-coat protein) (Alpha-COP) (HEP-COP) (HEPCOP) [Cleaved into: Xenin (Xenopsin-related peptide); Proxenin]	1700	17	1400	82.7	Cargo A	Cytoplasm		138.34		A1	1515
IF4B_HUMAN	Eukaryotic translation initiation factor 4B (eIF-4B)	980	17	1200	71.4	Cargo A			69.15		A1	1018
PP6R1_HUMAN	Serine/threonine-protein phosphatase 6 regulatory subunit 1 (SAPS domain family member 1)	9800	17	1200	71.2	Cargo A	Cytoplasm		96.723		A1	4565
NCDN_HUMAN	Neurochondrin	5700	17	690	40.5	Cargo A	Cytoplasm	Thakar&Karaca	78.863		A1	4362
VP37A_HUMAN	Vacuolar protein sorting-associated protein 37A (hVps37A) (ESCRT-I complex subunit VPS37A) (Hepatocellular carcinoma-related protein 1)	2500	17	310	17.8	Cargo A	Both		44.314		A1	3061
CBL_HUMAN	E3 ubiquitin-protein ligase CBL (EC 6.3.2.-) (Casitas B-lineage lymphoma proto-oncogene) (Proto-oncogene c-Cbl) (RING finger protein 55) (Signal transduction protein CBL)	2000	17	250	14.1	Cargo A	Cytoplasm		99.632		A1	1001
GRDN_HUMAN	Girdin (Akt phosphorylation enhancer) (APE) (Coiled-coil domain-containing protein 88A) (G alpha-interacting vesicle-associated protein) (GIV) (Girders of actin filament) (Hook-related protein 1) (HkRP1)	580	17	190	11.4	Cargo A	Cytoplasm		212.62		A1	2351
VPS28_HUMAN	Vacuolar protein sorting-associated protein 28 homolog (H-Vps28) (ESCRT-I complex subunit VPS28)	1000	17	130	7.36	Cargo A	Cytoplasm		25.425		A1	4474
NP1L4_HUMAN	Nucleosome assembly protein 1-like 4 (Nucleosome assembly protein 2) (NAP-2)	33000	16	4000	259	Cargo A	Nucleus		42.823		A1	3622
SAHH2_HUMAN	Putative adenosylhomocysteinase 2 (AdoHcyase 2) (EC 3.3.1.1) (DC-expressed AHCY-like molecule) (IP(3)Rs binding protein released with IP(3)) (IRBIT) (S-adenosyl-L-homocysteine hydrolase 2) (S-adenosylhomocysteine hydrolase-like protein 1)	24000	16	2900	176	Cargo A	Cytoplasm		58.951		A1	357
GORS2_HUMAN	Golgi reassembly-stacking protein 2 (GRS2) (Golgi phosphoprotein 6) (GOLPH6) (Golgi reassembly-stacking protein of 55 kDa) (GRASP55) (p59)	22000	16	2700	167	Cargo A	Cytoplasm		47.145		A1	3997
AL14E_HUMAN	ARL14 effector protein (ARF7 effector protein)	1100	16	140	8.96	Cargo A	Cytoplasm		29.337		A1	3006
BCAS3_HUMAN	Breast carcinoma-amplified sequence 3 (GAOB1)	610	16	75	4.68	Cargo A	Both		102.11		A1	3966
ARP3_HUMAN	Actin-related protein 3 (Actin-like protein 3)	2900	15	3400	224	Cargo A	Cytoplasm		47.371		A1	1616
AP1B1_HUMAN	AP-1 complex subunit beta-1 (Adaptor protein complex AP-1 subunit beta-1) (Adaptor-related protein complex 1 subunit beta-1) (Beta-1-adaptin) (Beta-adaptin 1) (Clathrin assembly protein complex 1 beta large chain) (Golgi adaptor HA1/AP1 adaptin beta subunit)	12000	15	1400	98.4	Cargo A	Cytoplasm		103.92		A1	1912
SC16A_HUMAN	Protein transport protein Sec16A (SEC16 homolog A)	2300	15	1300	88.8	Cargo A	Cytoplasm		235.75		A1	233
CSDE1_HUMAN	Cold shock domain-containing protein E1 (N-ras upstream gene protein) (Protein UNR)	4200	15	840	55.7	Cargo A	Cytoplasm		88.884		A1	486
RPAP3_HUMAN	RNA polymerase II-associated protein 3	4000	15	480	33.1	Cargo A			75.718		A1	3964
BICD2_HUMAN	Protein bicaudal D homolog 2 (Bic-D 2)	3100	15	380	25.3	Cargo A	Cytoplasm		96.805		A1	3122
DCAF7_HUMAN	DDB1- and CUL4-associated factor 7 (WD repeat-containing protein 68) (WD repeat-containing protein An11 homolog)	3100	15	380	25.2	Cargo A	Both		38.926		A1	1638
SRP19_HUMAN	Signal recognition particle 19 kDa protein (SRP19)	2200	15	270	18.3	Cargo A	Cytoplasm		16.156		A1	794
RCD1_HUMAN	Cell differentiation protein RCD1 homolog (Rcd-1) (CCR4-NOT transcription complex subunit 9)	1300	15	160	10.5	Cargo A	Both		33.631		A1	3236
TR150_HUMAN	Thyroid hormone receptor-associated protein 3 (Thyroid hormone receptor-associated protein complex 150 kDa component) (Trap150)	580	15	71	4.8	Cargo A	Nucleus		108.66		A1	4642
FERM2_HUMAN	Fermitin family homolog 2 (Kindlin-2) (Mitogen-inducible gene 2 protein) (MIG-2) (Pleckstrin homology domain-containing family C member 1) (PH domain-containing family C member 1)	7900	14	970	71.5	Cargo A	Both	BioGrid	77.86		A1	3328
GBB2_HUMAN	Guanine nucleotide-binding protein G(I)/G(S)/G(T) subunit beta-2 (G protein subunit beta-2) (Transducin beta chain 2)	3400	14	410	29.3	Cargo A	Cytoplasm		37.331		A1	1696
SMAD5_HUMAN	Mothers against decapentaplegic homolog 5 (MAD homolog 5) (Mothers against DPP homolog 5) (JV5-1) (SMAD family member 5) (SMAD 5) (Smad5) (hSmad5)	2300	14	280	20.1	Cargo A	Both		52.258		A1	3620
CE170_HUMAN	Centrosomal protein of 170 kDa (Cep170) (KARP-1-binding protein) (KARP1-binding protein)	2200	14	270	19.5	Cargo A	Cytoplasm		175.29		A1	2433
TBL1X_HUMAN	F-box-like/WD repeat-containing protein TBL1X (SMAP55) (Transducin beta-like protein 1X) (Transducin-beta-like protein 1, X-linked)	1500	14	190	13.1	Cargo A	Nucleus		57.048		A1	428
FA21A_HUMAN	WASH complex subunit FAM21A	1500	14	180	12.6	Cargo A	Cytoplasm		147.18		A1	2514
TNIP1_HUMAN	TNFAIP3-interacting protein 1 (A20-binding inhibitor of NF-kappa-B activation 1) (ABIN-1) (HIV-1 Nef-interacting protein) (Nef-associated factor 1) (Naf1) (Nip40-1) (Virion-associated nuclear shuttling protein) (VAN) (hVAN)	810	14	99	6.94	Cargo A	Both		71.863		A1	2171
MTOR_HUMAN	Serine/threonine-protein kinase mTOR (EC 2.7.11.1) (FK506-binding protein 12-rapamycin complex-associated protein 1) (FKBP12-rapamycin complex-associated protein) (Mammalian target of rapamycin) (mTOR) (Mechanistic target of rapamycin) (Rapamycin and FKBP12 target 1) (Rapamycin target protein 1)	600	14	70	5.12	Cargo A	Both		288.89		A1	1285
CCDC6_HUMAN	Coiled-coil domain-containing protein 6 (Papillary thyroid carcinoma-encoded protein) (Protein H4)	14000	13	1700	129	Cargo A	Cytoplasm		53.29		A1	2271
ARAF_HUMAN	Serine/threonine-protein kinase A-Raf (EC 2.7.11.1) (Proto-oncogene A-Raf) (Proto-oncogene A-Raf-1) (Proto-oncogene Pks)	9000	13	1100	81.9	Cargo A			67.585		A1	825
ARC1A_HUMAN	Actin-related protein 2/3 complex subunit 1A (SOP2-like protein)	8900	13	1100	81.8	Cargo A	Cytoplasm		41.569		A1	3253
COPE_HUMAN	Coatomer subunit epsilon (Epsilon-coat protein) (Epsilon-COP)	7600	13	930	68.8	Cargo A	Cytoplasm		34.482		A1	179
RS17L_HUMAN	40S ribosomal protein S17-like	3200	13	390	31.3	Cargo A			15.55		A1	787
CTR9_HUMAN	RNA polymerase-associated protein CTR9 homolog (SH2 domain-binding protein 1)	1900	13	230	17.9	Cargo A	Nucleus		133.5		A1	2594
LEO1_HUMAN	RNA polymerase-associated protein LEO1 (Replicative senescence down-regulated leo1-like protein)	1600	13	200	14.9	Cargo A	Nucleus		75.403		A1	3179
EIF3L_HUMAN	Eukaryotic translation initiation factor 3 subunit L (eIF3l) (Eukaryotic translation initiation factor 3 subunit 6-interacting protein) (Eukaryotic translation initiation factor 3 subunit E-interacting protein)	1300	13	160	12.3	Cargo A	Cytoplasm		66.726		A1	4602
MK07_HUMAN	Mitogen-activated protein kinase 7 (MAP kinase 7) (MAPK 7) (EC 2.7.11.24) (Big MAP kinase 1) (BMK-1) (Extracellular signal-regulated kinase 5) (ERK-5)	1000	13	120	9.67	Cargo A	Both		88.385		A1	1972
MLF2_HUMAN	Myeloid leukemia factor 2 (Myelodysplasia-myeloid leukemia factor 2)	860	13	110	7.88	Cargo A	Both		28.147		A1	2256
ARAP3_HUMAN	Arf-GAP with Rho-GAP domain, ANK repeat and PH domain-containing protein 3 (Centaurin-delta-3) (Cnt-d3)	820	13	100	7.89	Cargo A	Cytoplasm		169.84		A1	3198
HPS6_HUMAN	Hermansky-Pudlak syndrome 6 protein (Ruby-eye protein homolog) (Ru)	770	13	94	7.5	Cargo A	Cytoplasm		82.974		A1	2855
M4K4_HUMAN	Mitogen-activated protein kinase kinase kinase kinase 4 (EC 2.7.11.1) (HPK/GCK-like kinase HGK) (MAPK/ERK kinase kinase kinase 4) (MEK kinase kinase 4) (MEKKK 4) (Nck-interacting kinase)	690	13	84	6.6	Cargo A	Cytoplasm		142.1		A1	647
AP1S2_HUMAN	AP-1 complex subunit sigma-2 (Adaptor protein complex AP-1 subunit sigma-1B) (Adaptor-related protein complex 1 subunit sigma-1B) (Clathrin assembly protein complex 1 sigma-1B small chain) (Golgi adaptor HA1/AP1 adaptin sigma-1B subunit) (Sigma 1B subunit of AP-1 clathrin) (Sigma-adaptin 1B) (Sigma1B-adaptin)	610	13	74	5.79	Cargo A	Cytoplasm		18.615		A1	1569
NHP2_HUMAN	H/ACA ribonucleoprotein complex subunit 2 (Nucleolar protein family A member 2) (snoRNP protein NHP2)	590	13	72	5.69	Cargo A	Nucleus		17.201		A1	4241
PP6R2_HUMAN	Serine/threonine-protein phosphatase 6 regulatory subunit 2 (SAPS domain family member 2)	530	13	65	5.09	Cargo A	Cytoplasm		101.01		A1	456
EDC4_HUMAN	Enhancer of mRNA-decapping protein 4 (Autoantigen Ge-1) (Autoantigen RCD-8) (Human enhancer of decapping large subunit) (Hedls)	500	13	62	4.65	Cargo A	Both		151.66		A1	2578
BUB3_HUMAN	Mitotic checkpoint protein BUB3	17000	12	2100	176	Cargo A	Nucleus		36.954		A1	337
MAGD2_HUMAN	Melanoma-associated antigen D2 (11B6) (Breast cancer-associated gene 1 protein) (BCG-1) (Hepatocellular carcinoma-associated protein JCL-1) (MAGE-D2 antigen)	11000	12	1400	119	Cargo A			64.953		A1	4547
WNK1_HUMAN	Serine/threonine-protein kinase WNK1 (EC 2.7.11.1) (Erythrocyte 65 kDa protein) (p65) (Kinase deficient protein) (Protein kinase lysine-deficient 1) (Protein kinase with no lysine 1) (hWNK1)	11000	12	1400	111	Cargo A	Cytoplasm		225.56		A1	3933
ANR50_HUMAN	Ankyrin repeat domain-containing protein 50	1900	12	230	19.4	Cargo A			155.86		A1	4519
LS14A_HUMAN	Protein LSM14 homolog A (Protein FAM61A) (Protein SCD6 homolog) (Putative alpha-synuclein-binding protein) (AlphaSNBP) (RNA-associated protein 55A) (hRAP55) (hRAP55A)	1600	12	200	16.3	Cargo A	Cytoplasm		50.553		A1	3047
DHX16_HUMAN	Putative pre-mRNA-splicing factor ATP-dependent RNA helicase DHX16 (EC 3.6.4.13) (ATP-dependent RNA helicase #3) (DEAH-box protein 16)	1100	12	150	12.4	Cargo A	Nucleus		119.26		A1	362
M3K7_HUMAN	Mitogen-activated protein kinase kinase kinase 7 (EC 2.7.11.25) (Transforming growth factor-beta-activated kinase 1) (TGF-beta-activated kinase 1)	1200	12	140	12	Cargo A	Cytoplasm		67.195		A1	302
GPN2_HUMAN	GPN-loop GTPase 2 (ATP-binding domain 1 family member B)	520	12	63	5.35	Cargo A			34.56		A1	4018
RPB2_HUMAN	DNA-directed RNA polymerase II subunit RPB2 (EC 2.7.7.6) (DNA-directed RNA polymerase II 140 kDa polypeptide) (DNA-directed RNA polymerase II subunit B) (RNA polymerase II subunit 2) (RNA polymerase II subunit B2)	2200	11	810	74	Cargo A	Nucleus	Thakar&Karaca	133.9		A1	1130
RPAB1_HUMAN	DNA-directed RNA polymerases I, II, and III subunit RPABC1 (RNA polymerases I, II, and III subunit ABC1) (DNA-directed RNA polymerase II 23 kDa polypeptide) (DNA-directed RNA polymerase II subunit E) (RPB5 homolog) (XAP4)	6100	11	740	69.8	Cargo A	Nucleus		24.551		A1	956
NMD3_HUMAN	60S ribosomal export protein NMD3 (hNMD3)	5000	11	610	56.6	Cargo A	Both	NESdbH, BioGrid, Thakar&Karaca	57.603		A1	3381
MKL2_HUMAN	MKL/myocardin-like protein 2 (Megakaryoblastic leukemia 2) (Myocardin-related transcription factor B) (MRTF-B)	4800	11	580	51.9	Cargo A	Nucleus		114.12		A1	4515
TRADD_HUMAN	Tumor necrosis factor receptor type 1-associated DEATH domain protein (TNFR1-associated DEATH domain protein) (TNFRSF1A-associated via death domain)	1700	11	210	19.4	Cargo A	Both		34.247		A1	2240
FERM1_HUMAN	Fermitin family homolog 1 (Kindlerin) (Kindlin syndrome protein) (Kindlin-1) (Unc-112-related protein 1)	1300	11	160	14.2	Cargo A	Cytoplasm		77.436		A1	3661
IKBB_HUMAN	NF-kappa-B inhibitor beta (NF-kappa-BIB) (I-kappa-B-beta) (IkB-B) (IkB-beta) (IkappaBbeta) (Thyroid receptor-interacting protein 9) (TR-interacting protein 9) (TRIP-9)	1100	11	130	11.3	Cargo A	Both		37.771		A1	2249
DBR1_HUMAN	Lariat debranching enzyme (EC 3.1.-.-)	1000	11	120	11	Cargo A	Nucleus		61.554		A1	4476
WDR81_HUMAN	WD repeat-containing protein 81	750	11	92	8.03	Cargo A			211.69		A1	2390
PASK_HUMAN	PAS domain-containing serine/threonine-protein kinase (PAS-kinase) (PASKIN) (hPASK) (EC 2.7.11.1)	630	11	77	6.71	Cargo A	Both		142.93		A1	3554
MTMRE_HUMAN	Myotubularin-related protein 14 (EC 3.1.3.-) (HCV NS5A-transactivated protein 4 splice variant A-binding protein 1) (NS5ATP4ABP1) (hJumpy)	590	11	72	6.74	Cargo A	Both		66.653		A1	3041
AP1G1_HUMAN	AP-1 complex subunit gamma-1 (Adaptor protein complex AP-1 subunit gamma-1) (Adaptor-related protein complex 1 subunit gamma-1) (Clathrin assembly protein complex 1 gamma-1 large chain) (Gamma1-adaptin) (Golgi adaptor HA1/AP1 adaptin subunit gamma-1)	4900	10	600	57.1	Cargo A	Cytoplasm		91.35		A1	343
F16B1_HUMAN	Protein FAM160B1	970	10	120	11.6	Cargo A			86.557		A1	2506
PDCD4_HUMAN	Programmed cell death protein 4 (Neoplastic transformation inhibitor protein) (Nuclear antigen H731-like) (Protein 197/15a)	890	10	110	10.5	Cargo A	Both		50.576		A1	2371
DAXX_HUMAN	Death domain-associated protein 6 (Daxx) (hDaxx) (ETS1-associated protein 1) (EAP1) (Fas death domain-associated protein)	590	10	72	7.19	Cargo A	Both		81.372		A1	4397
SETB1_HUMAN	Histone-lysine N-methyltransferase SETDB1 (EC 2.1.1.43) (ERG-associated protein with SET domain) (ESET) (Histone H3-K9 methyltransferase 4) (H3-K9-HMTase 4) (Lysine N-methyltransferase 1E) (SET domain bifurcated 1)	590	10	72	6.92	Cargo A	Nucleus		143		A1	2178
RPB7_HUMAN	DNA-directed RNA polymerase II subunit RPB7 (RNA polymerase II subunit B7) (DNA-directed RNA polymerase II subunit G) (RNA polymerase II 19 kDa subunit) (RPB19)	1400	9.9	170	16.9	Cargo A	Nucleus		19.294		A1	1675
BCL10_HUMAN	B-cell lymphoma/leukemia 10 (B-cell CLL/lymphoma 10) (Bcl-10) (CARD-containing molecule enhancing NF-kappa-B) (CARD-like apoptotic protein) (hCLAP) (CED-3/ICH-1 prodomain homologous E10-like regulator) (CIPER) (Cellular homolog of vCARMEN) (cCARMEN) (Cellular-E10) (c-E10) (Mammalian CARD-containing adapter molecule E10) (mE10)	1200	9.9	150	15.1	Cargo A	Both		26.251		A1	660
PDCD6_HUMAN	Programmed cell death protein 6 (Apoptosis-linked gene 2 protein) (Probable calcium-binding protein ALG-2)	2300	9.8	280	29.1	Cargo A	Both		21.868		A1	466
KAPCB_HUMAN	cAMP-dependent protein kinase catalytic subunit beta (PKA C-beta) (EC 2.7.11.11)	600	9.8	73	7.42	Cargo A	Both		40.622		A1	1002
SEC13_HUMAN	Protein SEC13 homolog (SEC13-like protein 1) (SEC13-related protein)	24000	9.7	2900	298	Cargo A	Both		35.54		A1	1559
STRUM_HUMAN	WASH complex subunit strumpellin (Strumpellin)	1500	9.7	180	18.4	Cargo A	Cytoplasm		134.28		A1	1917
T2FB_HUMAN	General transcription factor IIF subunit 2 (EC 3.6.4.12) (ATP-dependent helicase GTF2F2) (General transcription factor IIF 30 kDa subunit) (Transcription initiation factor IIF subunit beta) (TFIIF-beta) (Transcription initiation factor RAP30)	4700	9.5	570	60.1	Cargo A	Nucleus		28.38		A1	881
EIF3C_HUMAN	Eukaryotic translation initiation factor 3 subunit C (eIF3c) (Eukaryotic translation initiation factor 3 subunit 8) (eIF3 p110)	2100	9.5	260	27.6	Cargo A	Cytoplasm		105.34		A1	3607
EI2BB_HUMAN	Translation initiation factor eIF-2B subunit beta (S20I15) (S20III15) (eIF-2B GDP-GTP exchange factor subunit beta)	11000	9.3	1400	149	Cargo A			38.989		A1	1402
ABCE1_HUMAN	ATP-binding cassette sub-family E member 1 (2'-5'-oligoadenylate-binding protein) (HuHP68) (RNase L inhibitor) (Ribonuclease 4 inhibitor) (RNS4I)	5000	9.2	610	66.8	Cargo A	Cytoplasm		67.314		A1	1621
SHC1_HUMAN	SHC-transforming protein 1 (SHC-transforming protein 3) (SHC-transforming protein A) (Src homology 2 domain-containing-transforming protein C1) (SH2 domain protein C1)	2200	9.2	270	29.2	Cargo A	Cytoplasm		62.892		A1	1092
CPSF6_HUMAN	Cleavage and polyadenylation specificity factor subunit 6 (Cleavage and polyadenylation specificity factor 68 kDa subunit) (CFIm68) (CPSF 68 kDa subunit) (Pre-mRNA cleavage factor Im 68 kDa subunit) (Protein HPBRII-4/7)	660	9.2	81	8.75	Cargo A	Nucleus		52.325		A1	2292
MCTS1_HUMAN	Malignant T-cell-amplified sequence 1 (MCT-1) (Multiple copies T-cell malignancies)	6200	9.1	760	83.5	Cargo A	Cytoplasm		20.555		A1	4511
DEN4C_HUMAN	DENN domain-containing protein 4C	670	9.1	81	8.96	Cargo A	Cytoplasm		186.85		A1	2501
DNJA4_HUMAN	DnaJ homolog subfamily A member 4	1100	8.8	140	15.5	Cargo A	Cytoplasm		44.797		A1	3193
PRP31_HUMAN	U4/U6 small nuclear ribonucleoprotein Prp31 (Pre-mRNA-processing factor 31) (Serologically defined breast cancer antigen NY-BR-99) (U4/U6 snRNP 61 kDa protein) (Protein 61K) (hPrp31)	620	8.8	76	8.63	Cargo A	Nucleus		55.455		A1	3199
RPB9_HUMAN	DNA-directed RNA polymerase II subunit RPB9 (RNA polymerase II subunit B9) (DNA-directed RNA polymerase II subunit I) (RNA polymerase II 14.5 kDa subunit) (RPB14.5)	580	8.7	70	8.05	Cargo A	Nucleus		14.523		A1	1223
FKB15_HUMAN	FK506-binding protein 15 (FKBP-15) (133 kDa FK506-binding protein) (133 kDa FKBP) (FKBP-133) (WASP and FKBP-like) (WAFL)	500	8.7	61	6.99	Cargo A	Cytoplasm		133.63		A1	2442
AP1S1_HUMAN	AP-1 complex subunit sigma-1A (Adaptor protein complex AP-1 subunit sigma-1A) (Adaptor-related protein complex 1 subunit sigma-1A) (Clathrin assembly protein complex 1 sigma-1A small chain) (Clathrin coat assembly protein AP19) (Golgi adaptor HA1/AP1 adaptin sigma-1A subunit) (HA1 19 kDa subunit) (Sigma 1a subunit of AP-1 clathrin) (Sigma-adaptin 1A) (Sigma1A-adaptin)	2100	8.6	260	30.3	Cargo A	Cytoplasm		18.733		A1	1640
PYRG2_HUMAN	CTP synthase 2 (EC 6.3.4.2) (CTP synthetase 2) (UTP--ammonia ligase 2)	5100	8.5	620	72.8	Cargo A			65.677		A1	4127
RS3A_HUMAN	40S ribosomal protein S3a (v-fos transformation effector protein) (Fte-1)	1200	8.4	140	16.9	Cargo A	Both	Thakar&Karaca	29.945		A1	1623
TAB1_HUMAN	TGF-beta-activated kinase 1 and MAP3K7-binding protein 1 (Mitogen-activated protein kinase kinase kinase 7-interacting protein 1) (TGF-beta-activated kinase 1-binding protein 1) (TAK1-binding protein 1)	2800	8.3	340	40.4	Cargo A			54.643		A1	2254
IWS1_HUMAN	Protein IWS1 homolog (IWS1-like protein)	520	8.3	64	7.72	Cargo A	Nucleus		56.109		A1	3576
CNOT1_HUMAN	CCR4-NOT transcription complex subunit 1 (CCR4-associated factor 1) (Negative regulator of transcription subunit 1 homolog) (NOT1H) (hNOT1)	840	8.1	100	12.7	Cargo A	Both		266.94		A1	15
GGA2_HUMAN	ADP-ribosylation factor-binding protein GGA2 (Gamma-adaptin-related protein 2) (Golgi-localized, gamma ear-containing, ARF-binding protein 2) (VHS domain and ear domain of gamma-adaptin) (Vear)	560	8.1	69	8.48	Cargo A	Cytoplasm		67.15		A1	4471
SRSF2_HUMAN	Serine/arginine-rich splicing factor 2 (Protein PR264) (Splicing component, 35 kDa) (Splicing factor SC35) (SC-35) (Splicing factor, arginine/serine-rich 2)	4800	8	590	73.6	Cargo A	Nucleus	BioGrid	25.476		A1	1801
RS3_HUMAN	40S ribosomal protein S3 (EC 4.2.99.18)	2700	8	330	41.1	Cargo A	Both		26.688		A1	1012
NED4L_HUMAN	E3 ubiquitin-protein ligase NEDD4-like (EC 6.3.2.-) (NEDD4.2) (Nedd4-2)	1300	8	160	20.3	Cargo A	Cytoplasm		111.93		A1	3537
CTND1_HUMAN	Catenin delta-1 (Cadherin-associated Src substrate) (CAS) (p120 catenin) (p120(ctn)) (p120(cas))	530	7.9	210	26.1	Cargo A	Both	NESdbH	104.15		A1	410
PIHD1_HUMAN	PIH1 domain-containing protein 1 (Nucleolar protein 17 homolog)	2900	7.8	360	46	Cargo A			32.363		A1	4225
ZO2_HUMAN	Tight junction protein ZO-2 (Tight junction protein 2) (Zona occludens protein 2) (Zonula occludens protein 2)	960	7.8	120	15	Cargo A	Both	NESdbO	131.37		A1	4393
TMED8_HUMAN	Protein TMED8	670	7.8	82	10.5	Cargo A			35.74		A1	2614
COPZ1_HUMAN	Coatomer subunit zeta-1 (Zeta-1-coat protein) (Zeta-1 COP)	25000	7.7	3000	395	Cargo A	Cytoplasm		20.198		A1	1635
WRIP1_HUMAN	ATPase WRNIP1 (EC 3.6.1.3) (Werner helicase-interacting protein 1)	2500	7.7	310	39.5	Cargo A	Nucleus		69.458		A1	3569
RS10_HUMAN	40S ribosomal protein S10	800	7.6	98	12.9	Cargo A	Both		18.898		A1	1331
ARPIN_HUMAN	Arpin (Arp2/3 inhibition protein)	1400	7.5	170	22.2	Cargo A	Cytoplasm		43.881		A1	2758
PPP6_HUMAN	Serine/threonine-protein phosphatase 6 catalytic subunit (PP6C) (EC 3.1.3.16) [Cleaved into: Serine/threonine-protein phosphatase 6 catalytic subunit, N-terminally processed]	20000	7.3	2400	329	Cargo A	Cytoplasm		35.144		A1	171
RS7_HUMAN	40S ribosomal protein S7	1500	7.3	180	24.9	Cargo A	Cytoplasm		22.127		A1	1645
CDK16_HUMAN	Cyclin-dependent kinase 16 (EC 2.7.11.22) (Cell division protein kinase 16) (PCTAIRE-motif protein kinase 1) (Serine/threonine-protein kinase PCTAIRE-1)	670	7.3	82	11.2	Cargo A	Cytoplasm		55.715		A1	1787
NTKL_HUMAN	N-terminal kinase-like protein (Coated vesicle-associated kinase of 90 kDa) (SCY1-like protein 1) (Telomerase regulation-associated protein) (Telomerase transcriptional element-interacting factor) (Teratoma-associated tyrosine kinase)	2300	7.2	280	38.8	Cargo A	Both		69.237		A1	3498
WDR55_HUMAN	WD repeat-containing protein 55	1200	7.2	140	19.6	Cargo A	Both		42.07		A1	3968
LSM4_HUMAN	U6 snRNA-associated Sm-like protein LSm4 (Glycine-rich protein) (GRP)	560	7.2	68	9.45	Cargo A	Nucleus		15.35		A1	4727
CFA20_HUMAN	Cilia- and flagella-associated protein 20 (Basal body up-regulated protein 22) (Transcription factor IIB)	1300	7.1	160	23.2	Cargo A	Both		22.774		A1	4780
YAP1_HUMAN	Transcriptional coactivator YAP1 (Yes-associated protein 1) (Protein yorkie homolog) (Yes-associated protein YAP65 homolog)	1100	7.1	140	18.9	Cargo A	Both	BioGrid	53.228		A1	1334
FYCO1_HUMAN	FYVE and coiled-coil domain-containing protein 1 (Zinc finger FYVE domain-containing protein 7)	810	7.1	98	13.9	Cargo A	Cytoplasm		166.98		A1	3663
RU2A_HUMAN	U2 small nuclear ribonucleoprotein A' (U2 snRNP A')	2300	7	280	39.7	Cargo A	Nucleus		28.415		A1	802
TB182_HUMAN	182 kDa tankyrase-1-binding protein	2000	7	250	35.2	Cargo A	Both		181.79		A1	3828
WASH7_HUMAN	WASH complex subunit 7 (Strumpellin and WASH-interacting protein) (SWIP)	850	7	100	14.7	Cargo A			136.4		A1	2318
SRRT_HUMAN	Serrate RNA effector molecule homolog (Arsenite-resistance protein 2)	2300	6.9	280	39.7	Cargo A	Both		100.15		A1	3779
KPRA_HUMAN	Phosphoribosyl pyrophosphate synthase-associated protein 1 (PRPP synthase-associated protein 1) (39 kDa phosphoribosypyrophosphate synthase-associated protein) (PAP39)	1100	6.9	130	18.7	Cargo A			42.467		A1	2112
CIP2A_HUMAN	Protein CIP2A (Cancerous inhibitor of PP2A) (p90 autoantigen)	4900	6.7	590	88.4	Cargo A	Cytoplasm	Thakar&Karaca	102.18		A1	3113
RS9_HUMAN	40S ribosomal protein S9	1100	6.7	130	19.4	Cargo A	Cytoplasm		22.591		A1	1329
ARP2_HUMAN	Actin-related protein 2 (Actin-like protein 2)	13000	6.6	1600	251	Cargo A	Cytoplasm		44.76		A1	1617
AAMP_HUMAN	Angio-associated migratory cell protein	1900	6.6	230	35.6	Cargo A	Cytoplasm	Thakar&Karaca	46.75		A1	2051
YBOX1_HUMAN	Nuclease-sensitive element-binding protein 1 (CCAAT-binding transcription factor I subunit A) (CBF-A) (DNA-binding protein B) (DBPB) (Enhancer factor I subunit A) (EFI-A) (Y-box transcription factor) (Y-box-binding protein 1) (YB-1)	2600	6.5	310	48.4	Cargo A	Both		35.924		A1	1724
RS16_HUMAN	40S ribosomal protein S16	2100	6.5	260	39.2	Cargo A			16.445		A1	1655
MP2K7_HUMAN	Dual specificity mitogen-activated protein kinase kinase 7 (MAP kinase kinase 7) (MAPKK 7) (EC 2.7.12.2) (JNK-activating kinase 2) (MAPK/ERK kinase 7) (MEK 7) (Stress-activated protein kinase kinase 4) (SAPK kinase 4) (SAPKK-4) (SAPKK4) (c-Jun N-terminal kinase kinase 2) (JNK kinase 2) (JNKK 2)	560	6.5	68	10.5	Cargo A	Both		47.484		A1	195
LIMC1_HUMAN	LIM and calponin homology domains-containing protein 1	1500	6.4	180	27.8	Cargo A			118.95		A1	4569
RUVB1_HUMAN	RuvB-like 1 (EC 3.6.4.12) (49 kDa TATA box-binding protein-interacting protein) (49 kDa TBP-interacting protein) (54 kDa erythrocyte cytosolic protein) (ECP-54) (INO80 complex subunit H) (Nuclear matrix protein 238) (NMP 238) (Pontin 52) (TIP49a) (TIP60-associated protein 54-alpha) (TAP54-alpha)	11000	6.3	5500	869	Cargo A	Both		50.227		A1	4604
RPAB4_HUMAN	DNA-directed RNA polymerases I, II, and III subunit RPABC4 (RNA polymerases I, II, and III subunit ABC4) (ABC10-alpha) (DNA-directed RNA polymerase II subunit K) (RNA polymerase II 7.0 kDa subunit) (RPB7.0) (RPB10alpha)	2000	6.3	250	39.5	Cargo A	Nucleus		7.0041		A1	1521
RPAP1_HUMAN	RNA polymerase II-associated protein 1	1800	6.2	210	34.8	Cargo A	Nucleus	Thakar&Karaca	152.75		A1	3770
TBL1R_HUMAN	F-box-like/WD repeat-containing protein TBL1XR1 (Nuclear receptor corepressor/HDAC3 complex subunit TBLR1) (TBL1-related protein 1) (Transducin beta-like 1X-related protein 1)	6300	6.1	770	127	Cargo A	Nucleus		55.594		A1	3814
NEK9_HUMAN	Serine/threonine-protein kinase Nek9 (EC 2.7.11.1) (Nercc1 kinase) (Never in mitosis A-related kinase 9) (NimA-related protein kinase 9) (NimA-related kinase 8) (Nek8)	3900	6.1	480	78.8	Cargo A	Both		107.17		A1	3123
ES8L2_HUMAN	Epidermal growth factor receptor kinase substrate 8-like protein 2 (EPS8-like protein 2) (Epidermal growth factor receptor pathway substrate 8-related protein 2) (EPS8-related protein 2)	1900	6.1	230	37.1	Cargo A	Cytoplasm		80.62		A1	3962
RS18_HUMAN	40S ribosomal protein S18 (Ke-3) (Ke3)	1200	6.1	150	24.8	Cargo A	Cytoplasm		17.718		A1	1661
CR025_HUMAN	Uncharacterized protein C18orf25	1000	5.9	120	20.8	Cargo A			36.977		A1	3340
KAP0_HUMAN	cAMP-dependent protein kinase type I-alpha regulatory subunit (Tissue-specific extinguisher 1) (TSE1) [Cleaved into: cAMP-dependent protein kinase type I-alpha regulatory subunit, N-terminally processed]	3500	5.8	490	83.5	Cargo A	Cytoplasm		42.981		A1	831
PRDX4_HUMAN	Peroxiredoxin-4 (EC 1.11.1.15) (Antioxidant enzyme AOE372) (AOE37-2) (Peroxiredoxin IV) (Prx-IV) (Thioredoxin peroxidase AO372) (Thioredoxin-dependent peroxide reductase A0372)	4700	5.7	1800	313	Cargo A	Cytoplasm		30.54	ER	A1	1971
RS8_HUMAN	40S ribosomal protein S8	820	5.7	100	17.5	Cargo A	Cytoplasm		24.205		A1	1653
ARPC3_HUMAN	Actin-related protein 2/3 complex subunit 3 (Arp2/3 complex 21 kDa subunit) (p21-ARC)	13000	5.5	1600	287	Cargo A	Cytoplasm		20.546		A1	250
CSK21_HUMAN	Casein kinase II subunit alpha (CK II alpha) (EC 2.7.11.1)	8600	5.5	1000	190	Cargo A			45.143		A1	1734
AP2A1_HUMAN	AP-2 complex subunit alpha-1 (100 kDa coated vesicle protein A) (Adaptor protein complex AP-2 subunit alpha-1) (Adaptor-related protein complex 2 subunit alpha-1) (Alpha-adaptin A) (Alpha1-adaptin) (Clathrin assembly protein complex 2 alpha-A large chain) (Plasma membrane adaptor HA2/AP2 adaptin alpha A subunit)	1800	5.5	290	51.7	Cargo A	Cytoplasm		105.36		A1	642
RS4X_HUMAN	40S ribosomal protein S4, X isoform (SCR10) (Single copy abundant mRNA protein)	1000	5.5	120	22.4	Cargo A	Cytoplasm		29.597		A1	1680
PDLI5_HUMAN	PDZ and LIM domain protein 5 (Enigma homolog) (Enigma-like PDZ and LIM domains protein)	760	5.4	940	175	Cargo A	Cytoplasm		63.944		A1	3462
EIF3H_HUMAN	Eukaryotic translation initiation factor 3 subunit H (eIF3h) (Eukaryotic translation initiation factor 3 subunit 3) (eIF-3-gamma) (eIF3 p40 subunit)	600	5.4	73	13.4	Cargo A	Cytoplasm		39.93		A1	272
PP4C_HUMAN	Serine/threonine-protein phosphatase 4 catalytic subunit (PP4C) (Pp4) (EC 3.1.3.16) (Protein phosphatase X) (PP-X)	11000	5.3	1300	243	Cargo A	Both		35.08		A1	1594
KAP2_HUMAN	cAMP-dependent protein kinase type II-alpha regulatory subunit	2800	5.3	340	64	Cargo A	Cytoplasm	Thakar&Karaca	45.518		A1	879
TRUB1_HUMAN	Probable tRNA pseudouridine synthase 1 (EC 5.4.99.-)	750	5.3	92	17.4	Cargo A			37.252		A1	3195
LSM1_HUMAN	U6 snRNA-associated Sm-like protein LSm1 (Cancer-associated Sm-like) (Small nuclear ribonuclear CaSm)	690	5.3	84	15.8	Cargo A	Nucleus		15.179		A1	247
RS23_HUMAN	40S ribosomal protein S23	1000	5.1	120	24.1	Cargo A			15.807		A1	1660
UBR5_HUMAN	E3 ubiquitin-protein ligase UBR5 (EC 6.3.2.-) (E3 ubiquitin-protein ligase, HECT domain-containing 1) (Hyperplastic discs protein homolog) (hHYD) (Progestin-induced protein)	810	5	100	19.8	Cargo A	Nucleus		309.22		A1	572
TRAD1_HUMAN	TRAF-type zinc finger domain-containing protein 1 (Protein FLN29)	770	5	95	19	Cargo A			64.84		A1	177
PI3R4_HUMAN	Phosphoinositide 3-kinase regulatory subunit 4 (PI3-kinase regulatory subunit 4) (EC 2.7.11.1) (PI3-kinase p150 subunit) (Phosphoinositide 3-kinase adaptor protein)	620	5	75	15.2	Cargo A	Cytoplasm		153.1		A1	3599
2ABA_HUMAN	Serine/threonine-protein phosphatase 2A 55 kDa regulatory subunit B alpha isoform (PP2A subunit B isoform B55-alpha) (PP2A subunit B isoform PR55-alpha) (PP2A subunit B isoform R2-alpha) (PP2A subunit B isoform alpha)	1200	4.9	2500	516	Cargo A		Thakar&Karaca	51.691		A1	1711
WDHD1_HUMAN	WD repeat and HMG-box DNA-binding protein 1 (Acidic nucleoplasmic DNA-binding protein 1) (And-1)	1300	4.9	150	31.5	Cargo A	Nucleus		125.97		A1	498
F91A1_HUMAN	Protein FAM91A1	540	4.9	66	13.5	Cargo A			93.908		A1	2515
ARPC4_HUMAN	Actin-related protein 2/3 complex subunit 4 (Arp2/3 complex 20 kDa subunit) (p20-ARC)	24000	4.8	3000	612	Cargo A	Cytoplasm		19.667		A1	1589
ERF3A_HUMAN	Eukaryotic peptide chain release factor GTP-binding subunit ERF3A (Eukaryotic peptide chain release factor subunit 3a) (eRF3a) (G1 to S phase transition protein 1 homolog)	530	4.8	2900	598	Cargo A			68.6		A1	899
DPOA2_HUMAN	DNA polymerase alpha subunit B (DNA polymerase alpha 70 kDa subunit)	1900	4.8	230	48.1	Cargo A	Nucleus		65.947		A1	2089
TBB8_HUMAN	Tubulin beta-8 chain	35000	4.7	4300	901	Cargo A	Cytoplasm		49.775		A1	2354
CD123_HUMAN	Cell division cycle protein 123 homolog (Protein D123) (HT-1080) (PZ32)	4100	4.6	500	110	Cargo A	Cytoplasm		39.134		A1	502
RS11_HUMAN	40S ribosomal protein S11	1900	4.5	230	50.8	Cargo A			18.431		A1	1663
SK2L2_HUMAN	Superkiller viralicidic activity 2-like 2 (EC 3.6.4.13) (ATP-dependent RNA helicase SKIV2L2) (TRAMP-like complex helicase)	640	4.5	78	17.6	Cargo A	Nucleus		117.8		A1	1281
ERF1_HUMAN	Eukaryotic peptide chain release factor subunit 1 (Eukaryotic release factor 1) (eRF1) (Protein Cl1) (TB3-1)	2300	4.4	2300	518	Cargo A	Cytoplasm		49.03		A1	1676
PP6R3_HUMAN	Serine/threonine-protein phosphatase 6 regulatory subunit 3 (SAPS domain family member 3) (Sporulation-induced transcript 4-associated protein SAPL)	7200	4.4	880	201	Cargo A	Both		94.444		A1	2407
SWAHC_HUMAN	Ankyrin repeat domain-containing protein SOWAHC (Ankyrin repeat domain-containing protein 57) (Protein sosondowah homolog C)	600	4.4	73	16.5	Cargo A			55.671		A1	2386
EI2BA_HUMAN	Translation initiation factor eIF-2B subunit alpha (eIF-2B GDP-GTP exchange factor subunit alpha)	9300	4.2	1100	273	Cargo A			33.712		A1	2095
ARP5L_HUMAN	Actin-related protein 2/3 complex subunit 5-like protein (Arp2/3 complex 16 kDa subunit 2) (ARC16-2)	2400	4.2	290	69.1	Cargo A	Cytoplasm		16.941		A1	3638
CSK2B_HUMAN	Casein kinase II subunit beta (CK II beta) (Phosvitin) (Protein G5a)	2100	4.1	940	233	Cargo A			24.942		A1	1725
ROA1_HUMAN	Heterogeneous nuclear ribonucleoprotein A1 (hnRNP A1) (Helix-destabilizing protein) (Single-strand RNA-binding protein) (hnRNP core protein A1) [Cleaved into: Heterogeneous nuclear ribonucleoprotein A1, N-terminally processed]	580	4	71	17.8	Cargo A	Both		29.386		A1	801
YTHD3_HUMAN	YTH domain-containing family protein 3	57	2500	440	0.0437	Cargo A			63.86		A2	2765
SIR2_HUMAN	NAD-dependent protein deacetylase sirtuin-2 (EC 3.5.1.-) (Regulatory protein SIR2 homolog 2) (SIR2-like protein 2)	26	2500	250	0.0437	Cargo A	Both	NESdbH, BioGrid	43.182		A2	2909
SRR1L_HUMAN	SRR1-like protein (SRR1 domain-containing protein)	190	2500	110	0.0437	Cargo A			38.573		A2	4410
LIN9_HUMAN	Protein lin-9 homolog (HuLin-9) (hLin-9) (Beta subunit-associated regulator of apoptosis) (TUDOR gene similar protein) (Type I interferon receptor beta chain-associated protein) (pRB-associated protein)	140	1700	76	0.0437	Cargo A	Nucleus		61.945		A2	2474
GRB10_HUMAN	Growth factor receptor-bound protein 10 (GRB10 adapter protein) (Insulin receptor-binding protein Grb-IR)	480	1300	59	0.0437	Cargo A	Cytoplasm		62.026		A2	1991
PPR3D_HUMAN	Protein phosphatase 1 regulatory subunit 3D (Protein phosphatase 1 regulatory subunit 6) (PP1 subunit R6) (Protein phosphatase 1-binding subunit R6)	470	1300	58	0.0437	Cargo A			32.559		A2	631
SLAI2_HUMAN	SLAIN motif-containing protein 2	470	1300	58	0.0437	Cargo A	Cytoplasm		62.543		A2	4342
PAGR1_HUMAN	PAXIP1-associated glutamate-rich protein 1 (PAXIP1-associated protein 1) (PTIP-associated protein 1)	460	1300	56	0.0437	Cargo A			27.716		A2	3710
CRTC1_HUMAN	CREB-regulated transcription coactivator 1 (Mucoepidermoid carcinoma translocated protein 1) (Transducer of regulated cAMP response element-binding protein 1) (TORC-1) (Transducer of CREB protein 1)	430	1200	52	0.0437	Cargo A	Both		62.529		A2	2626
TTLL4_HUMAN	Tubulin polyglutamylase TTLL4 (EC 6.-.-.-) (Tubulin--tyrosine ligase-like protein 4)	420	1200	51	0.0437	Cargo A	Cytoplasm		133.38		A2	2128
TCAM1_HUMAN	TIR domain-containing adapter molecule 1 (TICAM-1) (Proline-rich, vinculin and TIR domain-containing protein B) (Putative NF-kappa-B-activating protein 502H) (Toll-interleukin-1 receptor domain-containing adapter protein inducing interferon beta) (MyD88-3) (TIR domain-containing adapter protein inducing IFN-beta)	410	1200	50	0.0437	Cargo A			76.421		A2	2860
RIOK2_HUMAN	Serine/threonine-protein kinase RIO2 (EC 2.7.11.1) (RIO kinase 2)	410	1100	50	0.0437	Cargo A		NESdbH, Thakar&Karaca	63.282		A2	3755
SPA5L_HUMAN	Spermatogenesis-associated protein 5-like protein 1	14	1000	150	0.144	Cargo A	Cytoplasm		80.709		A2	3754
YTHD2_HUMAN	YTH domain-containing family protein 2 (CLL-associated antigen KW-14) (High-glucose-regulated protein 8) (Renal carcinoma antigen NY-REN-2)	33	820	470	0.573	Cargo A	Cytoplasm		62.333		A2	4740
CRTC3_HUMAN	CREB-regulated transcription coactivator 3 (Transducer of regulated cAMP response element-binding protein 3) (TORC-3) (Transducer of CREB protein 3)	92	820	370	0.45	Cargo A	Both		66.958		A2	2625
CDC27_HUMAN	Cell division cycle protein 27 homolog (Anaphase-promoting complex subunit 3) (APC3) (CDC27 homolog) (CDC27Hs) (H-NUC)	470	710	57	0.081	Cargo A	Nucleus		91.866		A2	1118
SMAP2_HUMAN	Stromal membrane-associated protein 2 (Stromal membrane-associated protein 1-like)	20	490	1600	3.25	Cargo A	Cytoplasm		46.785		A2	3158
KCTD3_HUMAN	BTB/POZ domain-containing protein KCTD3 (Renal carcinoma antigen NY-REN-45)	63	460	92	0.199	Cargo A			88.983		A2	4738
SHKB1_HUMAN	SH3KBP1-binding protein 1	210	380	280	0.728	Cargo A			76.343		A2	3101
TRI29_HUMAN	Tripartite motif-containing protein 29 (Ataxia telangiectasia group D-associated protein)	89	360	180	0.498	Cargo A	Cytoplasm		63.843		A2	2074
RL18_HUMAN	60S ribosomal protein L18	420	360	51	0.142	Cargo A	Cytoplasm	Thakar&Karaca	21.634		A2	1869
PUM1_HUMAN	Pumilio homolog 1 (HsPUM) (Pumilio-1)	18	340	76	0.22	Cargo A	Cytoplasm	Thakar&Karaca	126.47		A2	2124
IRAK1_HUMAN	Interleukin-1 receptor-associated kinase 1 (IRAK-1) (EC 2.7.11.1)	220	230	1200	4.99	Cargo A	Both		76.536		A2	1458
LPIN3_HUMAN	Phosphatidate phosphatase LPIN3 (EC 3.1.3.4) (Lipin-3) (Lipin-3-like)	430	220	53	0.234	Cargo A	Nucleus		93.613		A2	3659
RPGP1_HUMAN	Rap1 GTPase-activating protein 1 (Rap1GAP) (Rap1GAP1)	55	210	260	1.22	Cargo A	Cytoplasm		80.645		A2	1340
UBP2L_HUMAN	Ubiquitin-associated protein 2-like (Protein NICE-4)	15	210	190	0.922	Cargo A		Thakar&Karaca	103.93		A2	2084
RPGP2_HUMAN	Rap1 GTPase-activating protein 2 (Rap1GAP2) (GTPase-activating Rap/Ran-GAP domain-like protein 4)	25	210	160	0.747	Cargo A	Cytoplasm		80.055		A2	2523
PACN3_HUMAN	Protein kinase C and casein kinase substrate in neurons protein 3 (SH3 domain-containing protein 6511)	430	190	52	0.27	Cargo A	Cytoplasm		48.486		A2	4496
SPN1_HUMAN	Snurportin-1 (RNA U transporter 1)	9.1	180	2400	13.3	Cargo A	Both	NESdbH, BioGrid	41.142		A2	574
PEX5_HUMAN	Peroxisomal targeting signal 1 receptor (PTS1 receptor) (PTS1R) (PTS1-BP) (Peroxin-5) (Peroxisomal C-terminal targeting signal import receptor) (Peroxisome receptor 1)	120	150	1400	9.58	Cargo A	Cytoplasm		70.864		A2	1425
ANKL2_HUMAN	Ankyrin repeat and LEM domain-containing protein 2 (LEM domain-containing protein 4)	86	150	180	1.19	Cargo A	Cytoplasm		104.11	TM	A2	2840
HOOK2_HUMAN	Protein Hook homolog 2 (h-hook2) (hHK2)	490	150	60	0.397	Cargo A	Cytoplasm		83.021		A2	3401
LRCH3_HUMAN	Leucine-rich repeat and calponin homology domain-containing protein 3	44	140	160	1.17	Cargo A	Other		86.082	ER	A2	3470
CF106_HUMAN	Uncharacterized protein C6orf106	150	120	1900	15.4	Cargo A			32.871		A2	3956
IASPP_HUMAN	RelA-associated inhibitor (Inhibitor of ASPP protein) (Protein iASPP) (NFkB-interacting protein 1) (PPP1R13B-like protein)	7.8	120	1600	13.4	Cargo A	Both		89.09		A2	3163
PICAL_HUMAN	Phosphatidylinositol-binding clathrin assembly protein (Clathrin assembly lymphoid myeloid leukemia protein)	110	110	2900	27.5	Cargo A	Both		68.763		A2	2018
PATL1_HUMAN	Protein PAT1 homolog 1 (PAT1-like protein 1) (Protein PAT1 homolog b) (Pat1b) (hPat1b)	19	110	710	6.21	Cargo A	Both	NESdbH	86.849		A2	2778
TYSD1_HUMAN	Peroxisomal leader peptide-processing protease (EC 3.4.21.-) (Trypsin domain-containing protein 1) [Cleaved into: Peroxisomal leader peptide-processing protease, 15 kDa form; Peroxisomal leader peptide-processing protease, 45 kDa form]	420	98	52	0.525	Cargo B	Cytoplasm		59.308		B1_1	2326
LPP_HUMAN	Lipoma-preferred partner (LIM domain-containing preferred translocation partner in lipoma)	96	97	6700	68.6	Cargo B	Both	NESdbH, Thakar&Karaca	65.746		B1_1	3293
SMAP1_HUMAN	Stromal membrane-associated protein 1	280	90	4600	51.6	Cargo B	Cytoplasm	Thakar&Karaca	47.861		B1_1	2923
VIME_HUMAN	Vimentin	130	80	7400	93.4	Cargo B	Cytoplasm		53.651		B1_1	786
R3HD1_HUMAN	R3H domain-containing protein 1	450	77	55	0.706	Cargo B			107.58		B1_1	2173
GYS1_HUMAN	Glycogen [starch] synthase, muscle (EC 2.4.1.11)	400	73	6900	95.2	Cargo B			83.785		B1_1	878
PKHA6_HUMAN	Pleckstrin homology domain-containing family A member 6 (PH domain-containing family A member 6) (Phosphoinositol 3-phosphate-binding protein 3) (PEPP-3)	450	73	55	0.748	Cargo B			117.13		B1_1	4620
RPC4_HUMAN	DNA-directed RNA polymerase III subunit RPC4 (RNA polymerase III subunit C4) (DNA-directed RNA polymerase III subunit D) (Protein BN51) (RNA polymerase III 47 kDa subunit) (RPC53 homolog)	450	64	55	0.86	Cargo B	Nucleus		44.395		B1_1	727
REL_HUMAN	Proto-oncogene c-Rel	120	62	360	5.75	Cargo B	Nucleus		68.519		B1_1	1845
PERQ1_HUMAN	PERQ amino acid-rich with GYF domain-containing protein 1 (GRB10-interacting GYF protein 1)	79	58	270	4.69	Cargo B			114.6		B1_1	478
RPGF6_HUMAN	Rap guanine nucleotide exchange factor 6 (PDZ domain-containing guanine nucleotide exchange factor 2) (PDZ-GEF2) (RA-GEF-2)	70	58	220	3.75	Cargo B	Cytoplasm		179.42		B1_1	3143
NFKB1_HUMAN	Nuclear factor NF-kappa-B p105 subunit (DNA-binding factor KBF1) (EBP-1) (Nuclear factor of kappa light polypeptide gene enhancer in B-cells 1) [Cleaved into: Nuclear factor NF-kappa-B p50 subunit]	360	55	880	16.1	Cargo B	Both		105.35		B1_1	962
RING1_HUMAN	E3 ubiquitin-protein ligase RING1 (EC 6.3.2.-) (Polycomb complex protein RING1) (RING finger protein 1) (Really interesting new gene 1 protein)	440	52	53	1.02	Cargo B	Nucleus		42.429		B1_1	1866
RN216_HUMAN	E3 ubiquitin-protein ligase RNF216 (EC 6.3.2.-) (RING finger protein 216) (Triad domain-containing protein 3) (Ubiquitin-conjugating enzyme 7-interacting protein 1) (Zinc finger protein inhibiting NF-kappa-B)	450	46	56	1.21	Cargo B	Cytoplasm		105.88		B1_1	4219
SMU1_HUMAN	WD40 repeat-containing protein SMU1 (Smu-1 suppressor of mec-8 and unc-52 protein homolog) [Cleaved into: WD40 repeat-containing protein SMU1, N-terminally processed]	470	45	58	1.28	Cargo B	Both		57.543		B1_1	2330
ASCC1_HUMAN	Activating signal cointegrator 1 complex subunit 1 (ASC-1 complex subunit p50) (Trip4 complex subunit p50)	460	43	56	1.29	Cargo B	Cytoplasm		41.227		B1_1	3014
PABP4_HUMAN	Polyadenylate-binding protein 4 (PABP-4) (Poly(A)-binding protein 4) (Activated-platelet protein 1) (APP-1) (Inducible poly(A)-binding protein) (iPABP)	120	40	3400	84.3	Cargo B	Cytoplasm	Thakar&Karaca	72.39		B1_1	1990
SC31A_HUMAN	Protein transport protein Sec31A (ABP125) (ABP130) (SEC31-like protein 1) (SEC31-related protein A) (Web1-like protein)	86	40	810	20.6	Cargo B	Cytoplasm		133.01		B1_1	565
APOD_HUMAN	Apolipoprotein D (Apo-D) (ApoD)	69	40	74	1.87	Cargo B	Other		21.275	ER	B1_1	718
TF65_HUMAN	Transcription factor p65 (Nuclear factor NF-kappa-B p65 subunit) (Nuclear factor of kappa light polypeptide gene enhancer in B-cells 3)	390	39	5600	145	Cargo B	Both	NESdbH, Thakar&Karaca	58.806		B1_1	1834
MADD_HUMAN	MAP kinase-activating death domain protein (Differentially expressed in normal and neoplastic cells) (Insulinoma glucagonoma clone 20) (Rab3 GDP/GTP exchange factor)	380	39	480	12.2	Cargo B	Cytoplasm		176.55		B1_1	3207
KDM3B_HUMAN	Lysine-specific demethylase 3B (EC 1.14.11.-) (JmjC domain-containing histone demethylation protein 2B) (Jumonji domain-containing protein 1B) (Nuclear protein 5qNCA)	82	37	1100	29.7	Cargo B	Nucleus		191.58		B1_1	2709
SC24A_HUMAN	Protein transport protein Sec24A (SEC24-related protein A)	430	32	820	25.2	Cargo B	Cytoplasm		119.75		B1_1	616
PABP1_HUMAN	Polyadenylate-binding protein 1 (PABP-1) (Poly(A)-binding protein 1)	110	29	13000	463	Cargo B	Both	Thakar&Karaca	70.67		B1_1	853
AIM1_HUMAN	Absent in melanoma 1 protein (Beta/gamma crystallin domain-containing protein 1)	250	29	97	3.35	Cargo B			188.67		B1_1	4715
RTCB_HUMAN	tRNA-splicing ligase RtcB homolog (EC 6.5.1.3)	490	29	60	2.09	Cargo B	Both		55.21		B1_1	4679
MTMR9_HUMAN	Myotubularin-related protein 9	480	28	59	2.08	Cargo B	Cytoplasm		63.461		B1_1	3547
RTN3_HUMAN	Reticulon-3 (Homolog of ASY protein) (HAP) (Neuroendocrine-specific protein-like 2) (NSP-like protein 2) (Neuroendocrine-specific protein-like II) (NSP-like protein II) (NSPLII)	420	28	51	1.8	Cargo B	Cytoplasm		25.609		B1_1	578
RENT1_HUMAN	Regulator of nonsense transcripts 1 (EC 3.6.4.-) (ATP-dependent helicase RENT1) (Nonsense mRNA reducing factor 1) (NORF1) (Up-frameshift suppressor 1 homolog) (hUpf1)	56	26	3300	126	Cargo B	Both		124.34		B1_1	3272
CLAP1_HUMAN	CLIP-associating protein 1 (Cytoplasmic linker-associated protein 1) (Multiple asters homolog 1) (Protein Orbit homolog 1) (hOrbit1)	460	24	56	2.35	Cargo B	Cytoplasm		169.45		B1_1	2735
AHR_HUMAN	Aryl hydrocarbon receptor (Ah receptor) (AhR) (Class E basic helix-loop-helix protein 76) (bHLHe76)	290	23	440	18.9	Cargo B	Both	NESdbH	96.146		B1_1	1207
AKP8L_HUMAN	A-kinase anchor protein 8-like (AKAP8-like protein) (Helicase A-binding protein 95) (HAP95) (Homologous to AKAP95 protein) (HA95) (Neighbor of A-kinase-anchoring protein 95) (Neighbor of AKAP95)	150	22	92	4.17	Cargo B	Both		65.229		B1_1	4528
DOCK7_HUMAN	Dedicator of cytokinesis protein 7	360	19	64	3.36	Cargo B	Cytoplasm		241.41		B1_1	3521
P3C2B_HUMAN	Phosphatidylinositol 4-phosphate 3-kinase C2 domain-containing subunit beta (PI3K-C2-beta) (PtdIns-3-kinase C2 subunit beta) (EC 2.7.1.154) (C2-PI3K) (Phosphoinositide 3-kinase-C2-beta)	480	18	59	3.33	Cargo B	Both		184.77		B1_1	172
NFKB2_HUMAN	Nuclear factor NF-kappa-B p100 subunit (DNA-binding factor KBF2) (H2TF1) (Lymphocyte translocation chromosome 10 protein) (Nuclear factor of kappa light polypeptide gene enhancer in B-cells 2) (Oncogene Lyt-10) (Lyt10) [Cleaved into: Nuclear factor NF-kappa-B p52 subunit]	270	17	760	43.5	Cargo B	Both	NESdbH, Thakar&Karaca	96.677		B1_1	1793
BECN1_HUMAN	Beclin-1 (Coiled-coil myosin-like BCL2-interacting protein) (Protein GT197)	420	17	52	2.99	Cargo B	Cytoplasm	NESdbH	51.896		B1_1	2109
NCOA3_HUMAN	Nuclear receptor coactivator 3 (NCoA-3) (EC 2.3.1.48) (ACTR) (Amplified in breast cancer 1 protein) (AIB-1) (CBP-interacting protein) (pCIP) (Class E basic helix-loop-helix protein 42) (bHLHe42) (Receptor-associated coactivator 3) (RAC-3) (Steroid receptor coactivator protein 3) (SRC-3) (Thyroid hormone receptor activator molecule 1) (TRAM-1)	130	15	81	5.56	Cargo B	Both		154.89		B1_1	4796
SNX24_HUMAN	Sorting nexin-24	490	14	60	4.3	Cargo B	Cytoplasm		18.603		B1_1	4658
MP2K2_HUMAN	Dual specificity mitogen-activated protein kinase kinase 2 (MAP kinase kinase 2) (MAPKK 2) (EC 2.7.12.2) (ERK activator kinase 2) (MAPK/ERK kinase 2) (MEK 2)	310	13	8500	651	Cargo B			44.424		B1_1	1213
MYO10_HUMAN	Unconventional myosin-X (Unconventional myosin-10)	490	13	60	4.47	Cargo B	Cytoplasm		237.34		B1_1	4073
USP9X_HUMAN	Probable ubiquitin carboxyl-terminal hydrolase FAF-X (EC 3.4.19.12) (Deubiquitinating enzyme FAF-X) (Fat facets in mammals) (hFAM) (Fat facets protein-related, X-linked) (Ubiquitin thioesterase FAF-X) (Ubiquitin-specific protease 9, X chromosome) (Ubiquitin-specific-processing protease FAF-X)	150	12	1400	117	Cargo B	Cytoplasm		292.28		B1_1	3288
TANC2_HUMAN	Protein TANC2 (Tetratricopeptide repeat, ankyrin repeat and coiled-coil domain-containing protein 2)	460	12	96	7.72	Cargo B			219.65		B1_1	4054
CAMP2_HUMAN	Calmodulin-regulated spectrin-associated protein 2 (Calmodulin-regulated spectrin-associated protein 1-like protein 1)	450	12	55	4.6	Cargo B	Cytoplasm		165.06		B1_1	1896
RIC8B_HUMAN	Synembryn-B (Brain synembryn) (hSyn) (Protein Ric-8B)	460	11	56	5.01	Cargo B	Cytoplasm		58.824		B1_1	4200
ZO1_HUMAN	Tight junction protein ZO-1 (Tight junction protein 1) (Zona occludens protein 1) (Zonula occludens protein 1)	490	10	60	5.86	Cargo B	Cytoplasm		195.46		B1_1	1871
TBG1_HUMAN	Tubulin gamma-1 chain (Gamma-1-tubulin) (Gamma-tubulin complex component 1) (GCP-1)	260	9.9	260	26.6	Cargo B	Cytoplasm		51.169		B1_1	1008
TBCD5_HUMAN	TBC1 domain family member 5	490	8.9	60	6.73	Cargo B	Cytoplasm		89.003		B1_1	3237
TBA4A_HUMAN	Tubulin alpha-4A chain (Alpha-tubulin 1) (Testis-specific alpha-tubulin) (Tubulin H2-alpha) (Tubulin alpha-1 chain)	94	8.5	4600	541	Cargo B	Cytoplasm		49.924		B1_1	1732
TRI33_HUMAN	E3 ubiquitin-protein ligase TRIM33 (EC 6.3.2.-) (Ectodermin homolog) (RET-fused gene 7 protein) (Protein Rfg7) (Transcription intermediary factor 1-gamma) (TIF1-gamma) (Tripartite motif-containing protein 33)	95	8.3	84	10.1	Cargo B	Nucleus		122.53		B1_1	4566
RUVB2_HUMAN	RuvB-like 2 (EC 3.6.4.12) (48 kDa TATA box-binding protein-interacting protein) (48 kDa TBP-interacting protein) (51 kDa erythrocyte cytosolic protein) (ECP-51) (INO80 complex subunit J) (Repressing pontin 52) (Reptin 52) (TIP49b) (TIP60-associated protein 54-beta) (TAP54-beta)	200	8.2	5000	606	Cargo B	Both		51.156		B1_1	4598
EVI5L_HUMAN	EVI5-like protein (Ecotropic viral integration site 5-like protein)	440	8.2	53	6.51	Cargo B			91.375		B1_1	3369
MKL1_HUMAN	MKL/myocardin-like protein 1 (Megakaryoblastic leukemia 1 protein) (Megakaryocytic acute leukemia protein) (Myocardin-related transcription factor A) (MRTF-A)	480	7.9	59	7.5	Cargo B	Both		98.918		B1_1	3320
GNAS2_HUMAN	Guanine nucleotide-binding protein G(s) subunit alpha isoforms short (Adenylate cyclase-stimulating G alpha protein)	130	7.8	81	10.4	Cargo B	Cytoplasm		44.266		B1_1	1708
S23IP_HUMAN	SEC23-interacting protein (p125)	150	6.8	520	76.5	Cargo B	Cytoplasm		111.08		B1_1	4802
CCAR2_HUMAN	Cell cycle and apoptosis regulator protein 2 (Cell division cycle and apoptosis regulator protein 2) (DBIRD complex subunit KIAA1967) (Deleted in breast cancer gene 1 protein) (DBC-1) (DBC.1) (p30 DBC)	64	5.9	760	129	Cargo B	Nucleus		102.9		B1_1	2955
IKKA_HUMAN	Inhibitor of nuclear factor kappa-B kinase subunit alpha (I-kappa-B kinase alpha) (IKK-A) (IKK-alpha) (IkBKA) (IkappaB kinase) (EC 2.7.11.10) (Conserved helix-loop-helix ubiquitous kinase) (I-kappa-B kinase 1) (IKK1) (Nuclear factor NF-kappa-B inhibitor kinase alpha) (NFKBIKA) (Transcription factor 16) (TCF-16)	430	5.5	110	20.4	Cargo B	Both		84.639		B1_1	246
TTC1_HUMAN	Tetratricopeptide repeat protein 1 (TPR repeat protein 1)	350	5.3	810	152	Cargo B			33.526		B1_1	3608
AR6P4_HUMAN	ADP-ribosylation factor-like protein 6-interacting protein 4 (ARL-6-interacting protein 4) (Aip-4) (HSP-975) (HSVI-binding protein) (SR-15) (SRp25) (SR-25) (Splicing factor SRrp37)	430	5.2	52	10	Cargo B	Nucleus		25.348		B1_1	2521
TBB4B_HUMAN	Tubulin beta-4B chain (Tubulin beta-2 chain) (Tubulin beta-2C chain)	200	5.1	100000	20400	Cargo B	Cytoplasm	BioGrid	49.83		B1_1	1733
ZCHC8_HUMAN	Zinc finger CCHC domain-containing protein 8 (TRAMP-like complex RNA-binding factor ZCCHC8)	410	5	50	10.1	Cargo B	Nucleus		78.576		B1_1	2567
WDR34_HUMAN	WD repeat-containing protein 34	460	4.9	56	11.4	Cargo B	Cytoplasm		57.8		B1_1	3417
TBB4A_HUMAN	Tubulin beta-4A chain (Tubulin 5 beta) (Tubulin beta-4 chain)	280	4.2	340	81.7	Cargo B	Cytoplasm		49.585		B1_1	710
DPOD1_HUMAN	DNA polymerase delta catalytic subunit (EC 2.7.7.7) (DNA polymerase subunit delta p125)	400	4.1	770	189	Cargo B	Nucleus		123.63		B1_1	1082
STAT1_HUMAN	Signal transducer and activator of transcription 1-alpha/beta (Transcription factor ISGF-3 components p91/p84)	870	3.9	710	181	Cargo B	Both	NESdbH, BioGrid	87.334		B1_2	1277
FOXK1_HUMAN	Forkhead box protein K1 (Myocyte nuclear factor) (MNF)	500	3.9	430	112	Cargo B	Nucleus		75.456		B1_2	1775
RS13_HUMAN	40S ribosomal protein S13	1500	3.9	190	48.5	Cargo B			17.222		B1_2	1662
TBB3_HUMAN	Tubulin beta-3 chain (Tubulin beta-4 chain) (Tubulin beta-III)	680	3.9	83	21.3	Cargo B	Cytoplasm		50.432		B1_2	2020
EP15R_HUMAN	Epidermal growth factor receptor substrate 15-like 1 (Eps15-related protein) (Eps15R)	590	3.9	72	18.8	Cargo B	Both		94.254		B1_2	4365
SSRP1_HUMAN	FACT complex subunit SSRP1 (Chromatin-specific transcription elongation factor 80 kDa subunit) (Facilitates chromatin transcription complex 80 kDa subunit) (FACT 80 kDa subunit) (FACTp80) (Facilitates chromatin transcription complex subunit SSRP1) (Recombination signal sequence recognition protein 1) (Structure-specific recognition protein 1) (hSSRP1) (T160)	1300	3.8	160	43.1	Cargo B	Nucleus		81.074		B1_2	1895
ANR52_HUMAN	Serine/threonine-protein phosphatase 6 regulatory ankyrin repeat subunit C (PP6-ARS-C) (Serine/threonine-protein phosphatase 6 regulatory subunit ARS-C) (Ankyrin repeat domain-containing protein 52)	1100	3.8	140	37.1	Cargo B			115.08		B1_2	3026
SNRPA_HUMAN	U1 small nuclear ribonucleoprotein A (U1 snRNP A) (U1-A) (U1A)	1000	3.8	120	33.1	Cargo B	Nucleus		31.279		B1_2	792
ARPC2_HUMAN	Actin-related protein 2/3 complex subunit 2 (Arp2/3 complex 34 kDa subunit) (p34-ARC)	8800	3.7	1100	291	Cargo B	Cytoplasm		34.333		B1_2	249
DD19A_HUMAN	ATP-dependent RNA helicase DDX19A (EC 3.6.4.13) (DDX19-like protein) (DEAD box protein 19A)	1100	3.7	780	213	Cargo B	Both	BioGrid	53.974		B1_2	4185
KAPCA_HUMAN	cAMP-dependent protein kinase catalytic subunit alpha (PKA C-alpha) (EC 2.7.11.11)	4200	3.7	510	138	Cargo B	Both		40.589		B1_2	931
SHIP2_HUMAN	Phosphatidylinositol 3,4,5-trisphosphate 5-phosphatase 2 (EC 3.1.3.86) (Inositol polyphosphate phosphatase-like protein 1) (INPPL-1) (Protein 51C) (SH2 domain-containing inositol 5'-phosphatase 2) (SH2 domain-containing inositol phosphatase 2) (SHIP-2)	1900	3.7	290	79.5	Cargo B	Cytoplasm		138.6		B1_2	269
CHM2A_HUMAN	Charged multivesicular body protein 2a (Chromatin-modifying protein 2a) (CHMP2a) (Putative breast adenocarcinoma marker BC-2) (Vacuolar protein sorting-associated protein 2-1) (Vps2-1) (hVps2-1)	1100	3.7	130	35.3	Cargo B	Cytoplasm		25.104		B1_2	331
PELO_HUMAN	Protein pelota homolog (EC 3.1.-.-)	900	3.7	110	30	Cargo B	Both		43.359		B1_2	3682
LIN7C_HUMAN	Protein lin-7 homolog C (Lin-7C) (Mammalian lin-seven protein 3) (MALS-3) (Vertebrate lin-7 homolog 3) (Veli-3)	620	3.7	75	20.3	Cargo B	Cytoplasm		21.834		B1_2	4180
AAGAB_HUMAN	Alpha- and gamma-adaptin-binding protein p34	1700	3.6	200	56.4	Cargo B	Cytoplasm		34.593		B1_2	2595
F175B_HUMAN	BRISC complex subunit Abro1 (Abraxas brother protein 1) (Protein FAM175B)	1000	3.6	130	35.5	Cargo B			46.9		B1_2	2165
RU2B_HUMAN	U2 small nuclear ribonucleoprotein B'' (U2 snRNP B'')	990	3.6	120	33.3	Cargo B	Nucleus		25.486		B1_2	784
GPKOW_HUMAN	G patch domain and KOW motifs-containing protein (G patch domain-containing protein 5) (Protein MOS2 homolog) (Protein T54)	750	3.4	360	105	Cargo B	Nucleus		52.228		B1_2	3275
DPOD3_HUMAN	DNA polymerase delta subunit 3 (DNA polymerase delta subunit p66)	1600	3.4	200	58.3	Cargo B	Nucleus		51.4		B1_2	2182
MLTK_HUMAN	Mitogen-activated protein kinase kinase kinase MLT (EC 2.7.11.25) (Human cervical cancer suppressor gene 4 protein) (HCCS-4) (Leucine zipper- and sterile alpha motif-containing kinase) (MLK-like mitogen-activated protein triple kinase) (Mixed lineage kinase-related kinase) (MLK-related kinase) (MRK) (Sterile alpha motif- and leucine zipper-containing kinase AZK)	630	3.4	76	22.7	Cargo B	Both		91.154		B1_2	4277
WDR61_HUMAN	WD repeat-containing protein 61 (Meiotic recombination REC14 protein homolog) (SKI8 homolog) (Ski8) [Cleaved into: WD repeat-containing protein 61, N-terminally processed]	4000	3.3	480	147	Cargo B	Both		33.58		B1_2	3843
LRBA_HUMAN	Lipopolysaccharide-responsive and beige-like anchor protein (Beige-like protein) (CDC4-like protein)	1300	3.3	160	46.8	Cargo B	Cytoplasm		317.7	TM	B1_2	1440
RS25_HUMAN	40S ribosomal protein S25	1100	3.3	130	40.7	Cargo B			13.742		B1_2	1691
WDR82_HUMAN	WD repeat-containing protein 82 (Protein TMEM113) (Swd2)	550	3.3	67	20.6	Cargo B	Nucleus		35.079		B1_2	2632
RSSA_HUMAN	40S ribosomal protein SA (37 kDa laminin receptor precursor) (37LRP) (37/67 kDa laminin receptor) (LRP/LR) (67 kDa laminin receptor) (67LR) (Colon carcinoma laminin-binding protein) (Laminin receptor 1) (LamR) (Laminin-binding protein precursor p40) (LBP/p40) (Multidrug resistance-associated protein MGr1-Ag) (NEM/1CHD4)	4100	3.2	500	156	Cargo B	Both		32.854		B1_2	791
MAPK2_HUMAN	MAP kinase-activated protein kinase 2 (MAPK-activated protein kinase 2) (MAPKAP kinase 2) (MAPKAP-K2) (MAPKAPK-2) (MK-2) (MK2) (EC 2.7.11.1)	750	3.2	91	28.5	Cargo B	Both	NESdbO, BioGrid	45.567		B1_2	1372
CSK22_HUMAN	Casein kinase II subunit alpha' (CK II alpha') (EC 2.7.11.1)	2200	3.1	270	87.7	Cargo B			41.213		B1_2	961
TBA1B_HUMAN	Tubulin alpha-1B chain (Alpha-tubulin ubiquitous) (Tubulin K-alpha-1) (Tubulin alpha-ubiquitous chain)	3700	3	7300	2420	Cargo B	Cytoplasm		50.151		B1_2	1731
RL5_HUMAN	60S ribosomal protein L5	7300	3	900	301	Cargo B	Both	NESdbH	34.362		B1_2	1326
ANM3_HUMAN	Protein arginine N-methyltransferase 3 (EC 2.1.1.-) (Heterogeneous nuclear ribonucleoprotein methyltransferase-like protein 3)	710	2.9	960	336	Cargo B	Cytoplasm		59.875		B1_2	407
PRP4_HUMAN	U4/U6 small nuclear ribonucleoprotein Prp4 (PRP4 homolog) (hPrp4) (U4/U6 snRNP 60 kDa protein) (WD splicing factor Prp4)	1100	2.9	130	44.2	Cargo B	Nucleus		58.32		B1_2	288
RHG01_HUMAN	Rho GTPase-activating protein 1 (CDC42 GTPase-activating protein) (GTPase-activating protein rhoOGAP) (Rho-related small GTPase protein activator) (Rho-type GTPase-activating protein 1) (p50-RhoGAP)	1500	2.8	860	308	Cargo B	Cytoplasm		50.435		B1_2	1883
WDR5_HUMAN	WD repeat-containing protein 5 (BMP2-induced 3-kb gene protein)	1300	2.8	150	55	Cargo B	Nucleus		36.588		B1_2	1639
GBRL1_HUMAN	Gamma-aminobutyric acid receptor-associated protein-like 1 (Early estrogen-regulated protein) (GABA(A) receptor-associated protein-like 1) (Glandular epithelial cell protein 1) (GEC-1)	720	2.8	88	31.2	Cargo B	Cytoplasm		14.044		B1_2	3876
GAPD1_HUMAN	GTPase-activating protein and VPS9 domain-containing protein 1 (GAPex-5) (Rab5-activating protein 6)	2400	2.6	790	308	Cargo B	Cytoplasm		166.17		B1_2	2156
ETFB_HUMAN	Electron transfer flavoprotein subunit beta (Beta-ETF)	2500	2.6	310	118	Cargo B	Cytoplasm		27.843		B1_2	1231
ARC1B_HUMAN	Actin-related protein 2/3 complex subunit 1B (Arp2/3 complex 41 kDa subunit) (p41-ARC)	4900	2.5	600	238	Cargo B	Cytoplasm		40.949		B1_2	248
GSK3B_HUMAN	Glycogen synthase kinase-3 beta (GSK-3 beta) (EC 2.7.11.26) (Serine/threonine-protein kinase GSK3B) (EC 2.7.11.1)	1000	2.5	120	48.8	Cargo B	Both		46.744		B1_2	1408
FA65A_HUMAN	Protein FAM65A	800	2.5	97	39.2	Cargo B	Cytoplasm		131.87		B1_2	2654
RHG29_HUMAN	Rho GTPase-activating protein 29 (PTPL1-associated RhoGAP protein 1) (Rho-type GTPase-activating protein 29)	770	2.5	94	37.6	Cargo B			142.06		B1_2	2370
TELO2_HUMAN	Telomere length regulation protein TEL2 homolog (Protein clk-2 homolog) (hCLK2)	560	2.5	69	27.6	Cargo B	Both		91.746		B1_2	4722
KPCI_HUMAN	Protein kinase C iota type (EC 2.7.11.13) (Atypical protein kinase C-lambda/iota) (PRKC-lambda/iota) (aPKC-lambda/iota) (nPKC-iota)	1600	2.4	190	79.2	Cargo B	Both	NESdbO, Thakar&Karaca	68.262		B1_2	1273
STRAP_HUMAN	Serine-threonine kinase receptor-associated protein (MAP activator with WD repeats) (UNR-interacting protein) (WD-40 repeat protein PT-WD)	10000	2.3	1300	562	Cargo B	Both		38.438		B1_2	4678
DPOD2_HUMAN	DNA polymerase delta subunit 2 (EC 2.7.7.7) (DNA polymerase delta subunit p50)	3900	2.2	480	215	Cargo B	Nucleus		51.289		B1_2	1367
RS14_HUMAN	40S ribosomal protein S14	1900	2.2	240	107	Cargo B			16.273		B1_2	1659
EF2K_HUMAN	Eukaryotic elongation factor 2 kinase (eEF-2 kinase) (eEF-2K) (EC 2.7.11.20) (Calcium/calmodulin-dependent eukaryotic elongation factor 2 kinase)	1100	2.2	130	59.9	Cargo B			82.143		B1_2	145
ARHG1_HUMAN	Rho guanine nucleotide exchange factor 1 (115 kDa guanine nucleotide exchange factor) (p115-RhoGEF) (p115RhoGEF) (Sub1.5)	970	2.2	120	54.9	Cargo B	Cytoplasm		102.43		B1_2	3269
1433G_HUMAN	14-3-3 protein gamma (Protein kinase C inhibitor protein 1) (KCIP-1) [Cleaved into: 14-3-3 protein gamma, N-terminally processed]	2100	2.1	2900	1350	Cargo B	Cytoplasm		28.302		B1_2	1643
UBR4_HUMAN	E3 ubiquitin-protein ligase UBR4 (EC 6.3.2.-) (600 kDa retinoblastoma protein-associated factor) (N-recognin-4) (Retinoblastoma-associated factor of 600 kDa) (RBAF600) (p600) (Zinc finger UBR1-type protein 1)	780	2.1	95	45	Cargo B	Both		571.85	TM	B1_2	2447
DNJB6_HUMAN	DnaJ homolog subfamily B member 6 (HHDJ1) (Heat shock protein J2) (HSJ-2) (MRJ) (MSJ-1)	740	2.1	91	43.2	Cargo B	Both		26.899		B1_2	460
SERA_HUMAN	D-3-phosphoglycerate dehydrogenase (3-PGDH) (EC 1.1.1.95)	700	2	7600	3900	Cargo B			56.65		B1_2	289
RS5_HUMAN	40S ribosomal protein S5 [Cleaved into: 40S ribosomal protein S5, N-terminally processed]	740	2	91	45.1	Cargo B			22.876		B1_2	1330
GRWD1_HUMAN	Glutamate-rich WD repeat-containing protein 1	550	2	67	33.9	Cargo B	Nucleus	Thakar&Karaca	49.419		B1_2	3645
DDX3X_HUMAN	ATP-dependent RNA helicase DDX3X (EC 3.6.4.13) (DEAD box protein 3, X-chromosomal) (DEAD box, X isoform) (Helicase-like protein 2) (HLP2)	17	99	4600	47.1	Cargo B	Both	NESdbO, Thakar&Karaca	73.243		B2_1	166
LCN1_HUMAN	Lipocalin-1 (Tear lipocalin) (Tlc) (Tear prealbumin) (TP) (Von Ebner gland protein) (VEG protein)	27	49	85	1.72	Cargo B	Other		19.25	ER	B2_1	1132
HDAC6_HUMAN	Histone deacetylase 6 (HD6) (EC 3.5.1.98)	17	48	910	19.1	Cargo B	Both	BioGrid	131.42		B2_1	4377
CEP85_HUMAN	Centrosomal protein of 85 kDa (Cep85) (Coiled-coil domain-containing protein 21)	11	48	590	12.2	Cargo B	Both		85.567		B2_1	2579
RPTOR_HUMAN	Regulatory-associated protein of mTOR (Raptor) (p150 target of rapamycin (TOR)-scaffold protein)	42	43	170	3.99	Cargo B	Cytoplasm		149.04		B2_1	2951
SCYL2_HUMAN	SCY1-like protein 2 (Coated vesicle-associated kinase of 104 kDa)	14	39	510	13.1	Cargo B	Cytoplasm		103.71		B2_1	2585
LEG7_HUMAN	Galectin-7 (Gal-7) (HKL-14) (PI7) (p53-induced gene 1 protein)	15	37	150	4.01	Cargo B	Both		15.075		B2_1	1345
VAC14_HUMAN	Protein VAC14 homolog (Tax1-binding protein 2)	43	33	190	5.77	Cargo B	Cytoplasm		87.972		B2_1	1899
UBP47_HUMAN	Ubiquitin carboxyl-terminal hydrolase 47 (EC 3.4.19.12) (Deubiquitinating enzyme 47) (Ubiquitin thioesterase 47) (Ubiquitin-specific-processing protease 47)	22	27	3100	115	Cargo B	Cytoplasm		157.31		B2_1	3493
AKTS1_HUMAN	Proline-rich AKT1 substrate 1 (40 kDa proline-rich AKT substrate)	16	24	3300	142	Cargo B	Cytoplasm		27.383		B2_1	3342
ANKS6_HUMAN	Ankyrin repeat and SAM domain-containing protein 6 (Ankyrin repeat domain-containing protein 14) (SamCystin) (Sterile alpha motif domain-containing protein 6) (SAM domain-containing protein 6)	250	1200	31	0.0263	Cargo B	Cytoplasm		92.218		B2_2	2527
FA53C_HUMAN	Protein FAM53C	400	1100	49	0.0437	Cargo B			43.091		B2_2	4272
MEF2A_HUMAN	Myocyte-specific enhancer factor 2A (Serum response factor-like protein 1)	400	1100	49	0.0437	Cargo B	Nucleus		53.596		B2_2	1816
OTUD1_HUMAN	OTU domain-containing protein 1 (EC 3.4.19.12) (DUBA-7)	400	1100	49	0.0437	Cargo B			51.063		B2_2	2489
CRY2_HUMAN	Cryptochrome-2	390	1100	48	0.0437	Cargo B	Both		66.946		B2_2	2357
KAT7_HUMAN	Histone acetyltransferase KAT7 (EC 2.3.1.48) (Histone acetyltransferase binding to ORC1) (Lysine acetyltransferase 7) (MOZ, YBF2/SAS3, SAS2 and TIP60 protein 2) (MYST-2)	400	1100	48	0.0437	Cargo B	Nucleus		58.135		B2_2	587
SESQ1_HUMAN	Sesquipedalian-1 (Ses1) (27 kDa inositol polyphosphate phosphatase-interacting protein A) (IPIP27A)	390	1100	48	0.0437	Cargo B	Cytoplasm		27.215		B2_2	2978
ARP3B_HUMAN	Actin-related protein 3B (ARP3-beta) (Actin-like protein 3B) (Actin-related protein ARP4)	390	1100	47	0.0437	Cargo B	Cytoplasm		47.607		B2_2	4329
RL7A_HUMAN	60S ribosomal protein L7a (PLA-X polypeptide) (Surfeit locus protein 3)	390	1100	47	0.0437	Cargo B		Thakar&Karaca	29.995		B2_2	1674
CRTC2_HUMAN	CREB-regulated transcription coactivator 2 (Transducer of regulated cAMP response element-binding protein 2) (TORC-2) (Transducer of CREB protein 2)	380	1000	46	0.0437	Cargo B	Both		73.301		B2_2	2372
FOXO3_HUMAN	Forkhead box protein O3 (AF6q21 protein) (Forkhead in rhabdomyosarcoma-like 1)	370	1000	46	0.0437	Cargo B	Both	NESdbH	71.276		B2_2	323
PTTG1_HUMAN	Securin (Esp1-associated protein) (Pituitary tumor-transforming gene 1 protein) (Tumor-transforming protein 1) (hPTTG)	370	1000	45	0.0437	Cargo B	Both		22.024		B2_2	659
ALPK1_HUMAN	Alpha-protein kinase 1 (EC 2.7.11.-) (Chromosome 4 kinase) (Lymphocyte alpha-protein kinase)	43	990	43	0.0437	Cargo B			138.86		B2_2	3549
LORI_HUMAN	Loricrin	35	970	42	0.0437	Cargo B	Both		25.76		B2_2	1014
NDUV3_HUMAN	NADH dehydrogenase [ubiquinone] flavoprotein 3, mitochondrial (Complex I-9kD) (CI-9kD) (NADH-ubiquinone oxidoreductase 9 kDa subunit) (Renal carcinoma antigen NY-REN-4)	350	970	42	0.0437	Cargo B	Cytoplasm		50.983	MT	B2_2	1566
JADE3_HUMAN	Protein Jade-3 (Jade family PHD finger protein 3) (PHD finger protein 16)	340	950	41	0.0437	Cargo B			93.807		B2_2	3238
HNRPM_HUMAN	Heterogeneous nuclear ribonucleoprotein M (hnRNP M)	340	940	41	0.0437	Cargo B	Nucleus		73.62		B2_2	1479
PITX1_HUMAN	Pituitary homeobox 1 (Hindlimb-expressed homeobox protein backfoot) (Homeobox protein PITX1) (Paired-like homeodomain transcription factor 1)	340	940	41	0.0437	Cargo B	Nucleus		34.128		B2_2	1743
CCNB2_HUMAN	G2/mitotic-specific cyclin-B2	330	930	41	0.0437	Cargo B			45.281		B2_2	571
DEK_HUMAN	Protein DEK	330	930	41	0.0437	Cargo B	Nucleus		42.674		B2_2	1202
BIN3_HUMAN	Bridging integrator 3	330	920	40	0.0437	Cargo B	Cytoplasm		29.665		B2_2	4108
GPS2_HUMAN	G protein pathway suppressor 2 (GPS-2)	320	910	40	0.0437	Cargo B			36.688		B2_2	1978
SIK1_HUMAN	Serine/threonine-protein kinase SIK1 (EC 2.7.11.1) (Salt-inducible kinase 1) (SIK-1) (Serine/threonine-protein kinase SNF1-like kinase 1) (Serine/threonine-protein kinase SNF1LK)	320	910	40	0.0437	Cargo B	Both		84.901		B2_2	1575
TTP_HUMAN	Tristetraprolin (TTP) (G0/G1 switch regulatory protein 24) (Growth factor-inducible nuclear protein NUP475) (Protein TIS11A) (TIS11) (Zinc finger protein 36 homolog) (Zfp-36)	320	880	39	0.0437	Cargo B	Both	NESdbO	34.003		B2_2	1061
SAPC2_HUMAN	Suppressor APC domain-containing protein 2 (Tumor specificity and mitosis phase-dependent expression protein) (TS/MDEP) (p42.3)	310	870	38	0.0437	Cargo B	Both		42.636		B2_2	2792
S10A7_HUMAN	Protein S100-A7 (Psoriasin) (S100 calcium-binding protein A7)	36	860	38	0.0437	Cargo B	Cytoplasm		11.471		B2_2	1135
THOC4_HUMAN	THO complex subunit 4 (Tho4) (Ally of AML-1 and LEF-1) (Aly/REF export factor) (Transcriptional coactivator Aly/REF) (bZIP-enhancing factor BEF)	310	860	38	0.0437	Cargo B	Both		26.888		B2_2	2803
RS6_HUMAN	40S ribosomal protein S6 (Phosphoprotein NP33)	310	860	37	0.0437	Cargo B			28.68		B2_2	1683
VP37B_HUMAN	Vacuolar protein sorting-associated protein 37B (hVps37B) (ESCRT-I complex subunit VPS37B)	300	830	36	0.0437	Cargo B	Cytoplasm	BioGrid	31.307		B2_2	4013
CDC7_HUMAN	Cell division cycle 7-related protein kinase (CDC7-related kinase) (HsCdc7) (huCdc7) (EC 2.7.11.1)	290	810	36	0.0437	Cargo B	Nucleus	NESdbH	63.887		B2_2	140
DGC14_HUMAN	Protein DGCR14 (DiGeorge syndrome critical region 13) (DiGeorge syndrome critical region 14) (DiGeorge syndrome protein H) (DGS-H) (Protein ES2)	290	800	35	0.0437	Cargo B	Nucleus		52.567		B2_2	3385
DDX17_HUMAN	Probable ATP-dependent RNA helicase DDX17 (EC 3.6.4.13) (DEAD box protein 17) (DEAD box protein p72) (RNA-dependent helicase p72)	280	780	34	0.0437	Cargo B	Nucleus		80.272		B2_2	3262
CNO11_HUMAN	CCR4-NOT transcription complex subunit 11	260	740	32	0.0437	Cargo B	Both		55.215		B2_2	4502
PKP3_HUMAN	Plakophilin-3	130	710	31	0.0437	Cargo B	Both		87.081		B2_2	4690
SAHH3_HUMAN	Putative adenosylhomocysteinase 3 (AdoHcyase 3) (EC 3.3.1.1) (IP(3)Rs binding protein released with IP(3) 2) (IRBIT2) (S-adenosyl-L-homocysteine hydrolase 3) (S-adenosylhomocysteine hydrolase-like protein 2)	250	710	31	0.0437	Cargo B			66.592		B2_2	3464
SNTB2_HUMAN	Beta-2-syntrophin (59 kDa dystrophin-associated protein A1 basic component 2) (Syntrophin-3) (SNT3) (Syntrophin-like) (SNTL)	250	700	30	0.0437	Cargo B	Cytoplasm		57.949		B2_2	2002
STRAA_HUMAN	STE20-related kinase adapter protein alpha (STRAD alpha) (STE20-related adapter protein) (Serologically defined breast cancer antigen NY-BR-96)	250	690	30	0.0437	Cargo B	Both	NESdbH, BioGrid	48.368		B2_2	2712
ANR54_HUMAN	Ankyrin repeat domain-containing protein 54 (Lyn-interacting ankyrin repeat protein)	240	670	29	0.0437	Cargo B	Both	NESdbO	32.505		B2_2	2564
SNX21_HUMAN	Sorting nexin-21 (Sorting nexin L) (SNX-L)	240	670	29	0.0437	Cargo B	Cytoplasm		41.365		B2_2	3314
FBSL_HUMAN	Fibrosin-1-like protein (AUTS2-like protein) (HBV X-transactivated gene 9 protein) (HBV XAg-transactivated protein 9)	230	660	29	0.0437	Cargo B			110.91		B2_2	4063
GPAM1_HUMAN	GPALPP motifs-containing protein 1 (Lipopolysaccharide-specific response protein 7)	230	650	29	0.0437	Cargo B			22.226		B2_2	2912
CLASR_HUMAN	CLK4-associating serine/arginine rich protein (Splicing factor, arginine/serine-rich 16) (Suppressor of white-apricot homolog 2)	230	650	28	0.0437	Cargo B	Nucleus		77.16		B2_2	2963
KC1D_HUMAN	Casein kinase I isoform delta (CKI-delta) (CKId) (EC 2.7.11.1) (Tau-protein kinase CSNK1D) (EC 2.7.11.26)	230	640	28	0.0437	Cargo B	Both		46.832		B2_2	1364
OTUD4_HUMAN	OTU domain-containing protein 4 (EC 3.4.19.12) (HIV-1-induced protein HIN-1)	230	640	28	0.0437	Cargo B			124.04		B2_2	1811
RL28_HUMAN	60S ribosomal protein L28	230	640	28	0.0437	Cargo B			15.747		B2_2	1328
UTP15_HUMAN	U3 small nucleolar RNA-associated protein 15 homolog	230	640	28	0.0437	Cargo B	Nucleus		58.414		B2_2	3136
PR38A_HUMAN	Pre-mRNA-splicing factor 38A	220	620	27	0.0437	Cargo B	Nucleus		37.476		B2_2	3023
RL8_HUMAN	60S ribosomal protein L8	220	620	27	0.0437	Cargo B	Cytoplasm	Thakar&Karaca	28.024		B2_2	1701
CQ053_HUMAN	Uncharacterized protein C17orf53	220	610	27	0.0437	Cargo B			69.642		B2_2	2973
NFIA_HUMAN	Nuclear factor 1 A-type (NF1-A) (Nuclear factor 1/A) (CCAAT-box-binding transcription factor) (CTF) (Nuclear factor I/A) (NF-I/A) (NFI-A) (TGGCA-binding protein)	220	610	27	0.0437	Cargo B	Nucleus		54.619		B2_2	1928
WDR89_HUMAN	WD repeat-containing protein 89	220	610	27	0.0437	Cargo B			43.214		B2_2	3430
GAB2_HUMAN	GRB2-associated-binding protein 2 (GRB2-associated binder 2) (Growth factor receptor bound protein 2-associated protein 2) (pp100)	220	610	26	0.0437	Cargo B	Cytoplasm		69.967		B2_2	4589
GO45_HUMAN	Golgin-45 (Basic leucine zipper nuclear factor 1) (JEM-1) (p45 basic leucine-zipper nuclear factor)	220	600	26	0.0437	Cargo B	Both		44.91		B2_2	3904
LS14B_HUMAN	Protein LSM14 homolog B (Protein FAM61B) (RNA-associated protein 55B) (hRAP55B)	210	580	25	0.0437	Cargo B			42.07		B2_2	3772
PPIL4_HUMAN	Peptidyl-prolyl cis-trans isomerase-like 4 (PPIase) (EC 5.2.1.8) (Cyclophilin-like protein PPIL4) (Rotamase PPIL4)	210	580	25	0.0437	Cargo B	Nucleus		57.224		B2_2	3160
RMP_HUMAN	Unconventional prefoldin RPB5 interactor 1 (Protein NNX3) (Protein phosphatase 1 regulatory subunit 19) (RNA polymerase II subunit 5-mediating protein) (RPB5-mediating protein)	210	580	25	0.0437	Cargo B	Both		59.832		B2_2	535
SESQ2_HUMAN	Sesquipedalian-2 (Ses2) (27 kDa inositol polyphosphate phosphatase interacting protein B) (IPIP27B)	200	570	25	0.0437	Cargo B	Cytoplasm		28.338		B2_2	2550
SMN_HUMAN	Survival motor neuron protein (Component of gems 1) (Gemin-1)	200	570	25	0.0437	Cargo B	Both	Thakar&Karaca	30.45		B2_2	2293
TAF13_HUMAN	Transcription initiation factor TFIID subunit 13 (Transcription initiation factor TFIID 18 kDa subunit) (TAF(II)18) (TAFII-18) (TAFII18)	200	560	24	0.0437	Cargo B	Nucleus		14.287		B2_2	2235
PPR35_HUMAN	Protein phosphatase 1 regulatory subunit 35	200	550	24	0.0437	Cargo B			27.953		B2_2	3092
F207A_HUMAN	Protein FAM207A	190	540	24	0.0437	Cargo B			23.944		B2_2	4157
MAX_HUMAN	Protein max (Class D basic helix-loop-helix protein 4) (bHLHd4) (Myc-associated factor X)	190	540	24	0.0437	Cargo B	Both		17.202		B2_2	1622
M3K8_HUMAN	Mitogen-activated protein kinase kinase kinase 8 (EC 2.7.11.25) (Cancer Osaka thyroid oncogene) (Proto-oncogene c-Cot) (Serine/threonine-protein kinase cot) (Tumor progression locus 2) (TPL-2)	190	540	23	0.0437	Cargo B	Cytoplasm		49.619		B2_2	1272
CLPB_HUMAN	Caseinolytic peptidase B protein homolog (Suppressor of potassium transport defect 3)	190	530	23	0.0437	Cargo B			75.448		B2_2	3856
WDR20_HUMAN	WD repeat-containing protein 20 (Protein DMR)	190	530	23	0.0437	Cargo B			62.892		B2_2	3106
DAB2P_HUMAN	Disabled homolog 2-interacting protein (DAB2 interaction protein) (DAB2-interacting protein) (ASK-interacting protein 1) (AIP-1) (DOC-2/DAB-2 interactive protein)	190	520	23	0.0437	Cargo B	Cytoplasm		117.65		B2_2	2496
TRI37_HUMAN	E3 ubiquitin-protein ligase TRIM37 (EC 6.3.2.-) (Mulibrey nanism protein) (Tripartite motif-containing protein 37)	190	520	23	0.0437	Cargo B	Cytoplasm		107.9		B2_2	563
CHM4C_HUMAN	Charged multivesicular body protein 4c (Chromatin-modifying protein 4c) (CHMP4c) (SNF7 homolog associated with Alix 3) (SNF7-3) (hSnf7-3) (Vacuolar protein sorting-associated protein 32-3) (Vps32-3) (hVps32-3)	180	510	22	0.0437	Cargo B	Cytoplasm		26.41		B2_2	3366
GANP_HUMAN	Germinal-center associated nuclear protein (GANP) (80 kDa MCM3-associated protein) (MCM3 acetylating protein) (MCM3AP) (EC 2.3.1.-) (MCM3 acetyltransferase)	180	510	22	0.0437	Cargo B	Both		218.4		B2_2	377
HSPB8_HUMAN	Heat shock protein beta-8 (HspB8) (Alpha-crystallin C chain) (E2-induced gene 1 protein) (Protein kinase H11) (Small stress protein-like protein HSP22)	180	510	22	0.0437	Cargo B	Both		21.604		B2_2	4470
NEK4_HUMAN	Serine/threonine-protein kinase Nek4 (EC 2.7.11.1) (Never in mitosis A-related kinase 4) (NimA-related protein kinase 4) (Serine/threonine-protein kinase 2) (Serine/threonine-protein kinase NRK2)	180	500	22	0.0437	Cargo B	Cytoplasm		94.596		B2_2	1474
RASF9_HUMAN	Ras association domain-containing protein 9 (PAM COOH-terminal interactor protein 1) (P-CIP1) (Peptidylglycine alpha-amidating monooxygenase COOH-terminal interactor)	170	470	21	0.0437	Cargo B	Cytoplasm		50.02		B2_2	515
BORG5_HUMAN	Cdc42 effector protein 1 (Binder of Rho GTPases 5) (Serum protein MSE55)	170	470	20	0.0437	Cargo B	Cytoplasm		39.686		B2_2	1789
AR6P1_HUMAN	ADP-ribosylation factor-like protein 6-interacting protein 1 (ARL-6-interacting protein 1) (Aip-1)	170	460	20	0.0437	Cargo B	Cytoplasm		23.362	TM	B2_2	2175
DJC11_HUMAN	DnaJ homolog subfamily C member 11	160	460	20	0.0437	Cargo B			57.196		B2_2	4194
LRC58_HUMAN	Leucine-rich repeat-containing protein 58	170	460	20	0.0437	Cargo B			40.585		B2_2	3380
MLXIP_HUMAN	MLX-interacting protein (Class E basic helix-loop-helix protein 36) (bHLHe36) (Transcriptional activator MondoA)	160	460	20	0.0437	Cargo B	Both	NESdbH	101.18		B2_2	4027
MLXPL_HUMAN	Carbohydrate-responsive element-binding protein (ChREBP) (Class D basic helix-loop-helix protein 14) (bHLHd14) (MLX interactor) (MLX-interacting protein-like) (WS basic-helix-loop-helix leucine zipper protein) (WS-bHLH) (Williams-Beuren syndrome chromosomal region 14 protein)	160	460	20	0.0437	Cargo B	Nucleus	NESdbO	90.693		B2_2	4076
GPBL1_HUMAN	Vasculin-like protein 1 (GC-rich promoter-binding protein 1-like 1)	160	450	20	0.0437	Cargo B	Nucleus		52.301		B2_2	4051
RFWD3_HUMAN	E3 ubiquitin-protein ligase RFWD3 (EC 6.3.2.-) (RING finger and WD repeat domain-containing protein 3) (RING finger protein 201)	160	450	20	0.0437	Cargo B	Both		85.093		B2_2	2592
RL6_HUMAN	60S ribosomal protein L6 (Neoplasm-related protein C140) (Tax-responsive enhancer element-binding protein 107) (TaxREB107)	160	450	20	0.0437	Cargo B		Thakar&Karaca	32.728		B2_2	1826
EAF1_HUMAN	ELL-associated factor 1	160	440	19	0.0437	Cargo B	Nucleus		29.042		B2_2	3482
RL4_HUMAN	60S ribosomal protein L4 (60S ribosomal protein L1)	160	440	19	0.0437	Cargo B		Thakar&Karaca	47.697		B2_2	1216
TAF12_HUMAN	Transcription initiation factor TFIID subunit 12 (Transcription initiation factor TFIID 20/15 kDa subunits) (TAFII-20/TAFII-15) (TAFII20/TAFII15)	160	440	19	0.0437	Cargo B	Nucleus		14.825		B2_2	2279
ERRFI_HUMAN	ERBB receptor feedback inhibitor 1 (Mitogen-inducible gene 6 protein) (MIG-6)	150	430	19	0.0437	Cargo B	Both		50.559		B2_2	4460
RL10A_HUMAN	60S ribosomal protein L10a (CSA-19) (Neural precursor cell expressed developmentally down-regulated protein 6) (NEDD-6)	150	430	19	0.0437	Cargo B		Thakar&Karaca	24.831		B2_2	1699
ERCC2_HUMAN	TFIIH basal transcription factor complex helicase XPD subunit (EC 3.6.4.12) (Basic transcription factor 2 80 kDa subunit) (BTF2 p80) (CXPD) (DNA excision repair protein ERCC-2) (DNA repair protein complementing XP-D cells) (TFIIH basal transcription factor complex 80 kDa subunit) (TFIIH 80 kDa subunit) (TFIIH p80) (Xeroderma pigmentosum group D-complementing protein)	150	420	18	0.0437	Cargo B	Both		86.908		B2_2	940
PACE1_HUMAN	Protein-associating with the carboxyl-terminal domain of ezrin (Ezrin-binding protein PACE-1) (SCY1-like protein 3)	150	420	18	0.0437	Cargo B	Cytoplasm		76.73		B2_2	2937
CAPON_HUMAN	Carboxyl-terminal PDZ ligand of neuronal nitric oxide synthase protein (C-terminal PDZ ligand of neuronal nitric oxide synthase protein) (Nitric oxide synthase 1 adaptor protein)	150	410	18	0.0437	Cargo B			55.568		B2_2	437
SRSF1_HUMAN	Serine/arginine-rich splicing factor 1 (Alternative-splicing factor 1) (ASF-1) (Splicing factor, arginine/serine-rich 1) (pre-mRNA-splicing factor SF2, P33 subunit)	150	410	18	0.0437	Cargo B	Both		27.744		B2_2	1882
RBMS2_HUMAN	RNA-binding motif, single-stranded-interacting protein 2 (Suppressor of CDC2 with RNA-binding motif 3)	37	390	17	0.0437	Cargo B	Nucleus		43.958		B2_2	2225
MITF_HUMAN	Microphthalmia-associated transcription factor (Class E basic helix-loop-helix protein 32) (bHLHe32)	130	370	16	0.0437	Cargo B	Nucleus		52.526		B2_2	434
RIOK1_HUMAN	Serine/threonine-protein kinase RIO1 (EC 2.7.11.1) (RIO kinase 1)	130	370	16	0.0437	Cargo B			65.582		B2_2	3679
PLOD1_HUMAN	Procollagen-lysine,2-oxoglutarate 5-dioxygenase 1 (EC 1.14.11.4) (Lysyl hydroxylase 1) (LH1)	13	360	23	0.0642	Cargo B	Cytoplasm		83.549	ER	B2_2	1823
ACD_HUMAN	Adrenocortical dysplasia protein homolog (POT1 and TIN2-interacting protein)	130	360	16	0.0437	Cargo B	Nucleus		57.392		B2_2	3332
FOXO1_HUMAN	Forkhead box protein O1 (Forkhead box protein O1A) (Forkhead in rhabdomyosarcoma)	130	360	16	0.0437	Cargo B	Both		69.661		B2_2	1920
GAREM_HUMAN	GRB2-associated and regulator of MAPK protein (GRB2-associated and regulator of MAPK1)	130	360	16	0.0437	Cargo B			97.098		B2_2	3971
IQCB1_HUMAN	IQ calmodulin-binding motif-containing protein 1 (Nephrocystin-5) (p53 and DNA damage-regulated IQ motif protein) (PIQ)	130	360	16	0.0437	Cargo B	Cytoplasm		68.928		B2_2	2180
CASC3_HUMAN	Protein CASC3 (Cancer susceptibility candidate gene 3 protein) (Metastatic lymph node gene 51 protein) (MLN 51) (Protein barentsz) (Btz)	120	350	15	0.0437	Cargo B	Both		76.277		B2_2	259
FRAT2_HUMAN	GSK-3-binding protein FRAT2 (Frequently rearranged in advanced T-cell lymphomas 2) (FRAT-2)	130	350	15	0.0437	Cargo B			24.051		B2_2	481
LRCH1_HUMAN	Leucine-rich repeat and calponin homology domain-containing protein 1 (Calponin homology domain-containing protein 1) (Neuronal protein 81) (NP81)	120	350	15	0.0437	Cargo B			77.224		B2_2	4632
PKHJ1_HUMAN	Pleckstrin homology domain-containing family J member 1 (PH domain-containing family J member 1) (Guanine nucleotide-releasing protein x)	130	350	15	0.0437	Cargo B			17.551		B2_2	4214
SBP2L_HUMAN	Selenocysteine insertion sequence-binding protein 2-like (SECIS-binding protein 2-like)	120	340	15	0.0435	Cargo B		NESdbH	116.55		B2_2	3295
STN1_HUMAN	CST complex subunit STN1 (Oligonucleotide/oligosaccharide-binding fold-containing protein 1) (Suppressor of cdc thirteen homolog)	120	340	15	0.0437	Cargo B	Nucleus		42.119		B2_2	3952
DI3L1_HUMAN	DIS3-like exonuclease 1 (EC 3.1.13.-)	120	330	15	0.0437	Cargo B	Cytoplasm	Thakar&Karaca	105.01		B2_2	3152
BACH1_HUMAN	Transcription regulator protein BACH1 (BTB and CNC homolog 1) (HA2303)	120	330	14	0.0437	Cargo B	Nucleus	NESdbO, BioGrid	81.957		B2_2	211
CARF_HUMAN	CDKN2A-interacting protein (Collaborator of ARF)	120	330	14	0.0437	Cargo B	Nucleus		61.124		B2_2	4261
LIN37_HUMAN	Protein lin-37 homolog (Antolefinin)	120	330	14	0.0437	Cargo B			28.383		B2_2	3457
TCF25_HUMAN	Transcription factor 25 (TCF-25) (Nuclear localized protein 1)	120	330	14	0.0437	Cargo B	Nucleus		76.666		B2_2	3647
BCLF1_HUMAN	Bcl-2-associated transcription factor 1 (Btf)	110	320	14	0.0437	Cargo B	Both		100.23		B2_2	4273
CU002_HUMAN	Protein C21orf2 (C21orf-HUMF09G8.5) (YF5/A2)	120	320	14	0.0437	Cargo B			23.653		B2_2	353
FBRS_HUMAN	Probable fibrosin-1	120	320	14	0.0437	Cargo B			48.388		B2_2	4026
PJA1_HUMAN	E3 ubiquitin-protein ligase Praja-1 (Praja1) (EC 6.3.2.-) (RING finger protein 70)	110	320	14	0.0437	Cargo B			64.728		B2_2	3075
POC5_HUMAN	Centrosomal protein POC5 (Protein of centriole 5) (hPOC5)	110	320	14	0.0437	Cargo B	Cytoplasm		44.255		B2_2	3020
PWP2_HUMAN	Periodic tryptophan protein 2 homolog	110	320	14	0.0437	Cargo B	Nucleus		102.45		B2_2	2200
DHX35_HUMAN	Probable ATP-dependent RNA helicase DHX35 (EC 3.6.4.13) (DEAH box protein 35)	110	310	14	0.0437	Cargo B			75.439		B2_2	3950
IFT56_HUMAN	Intraflagellar transport protein 56 (Tetratricopeptide repeat protein 26) (TPR repeat protein 26)	110	310	14	0.0437	Cargo B	Cytoplasm		64.177		B2_2	0
NEK1_HUMAN	Serine/threonine-protein kinase Nek1 (EC 2.7.11.1) (Never in mitosis A-related kinase 1) (NimA-related protein kinase 1) (Renal carcinoma antigen NY-REN-55)	110	310	14	0.0437	Cargo B	Both		138.07		B2_2	3539
RBMS1_HUMAN	RNA-binding motif, single-stranded-interacting protein 1 (Single-stranded DNA-binding protein MSSP-1) (Suppressor of CDC2 with RNA-binding motif 2)	110	310	14	0.0437	Cargo B	Nucleus		44.136		B2_2	1097
A16L2_HUMAN	Autophagy-related protein 16-2 (APG16-like 2) (WD repeat-containing protein 80)	110	310	13	0.0437	Cargo B	Cytoplasm		56.954		B2_2	3021
KLF5_HUMAN	Krueppel-like factor 5 (Basic transcription element-binding protein 2) (BTE-binding protein 2) (Colon krueppel-like factor) (GC-box-binding protein 2) (Intestinal-enriched krueppel-like factor) (Transcription factor BTEB2)	110	310	13	0.0437	Cargo B	Nucleus	NESdbO	50.791		B2_2	2060
RUSC2_HUMAN	Iporin (Interacting protein of Rab1) (RUN and SH3 domain-containing protein 2)	200	300	24	0.0799	Cargo B	Cytoplasm		161.22		B2_2	2964
CINP_HUMAN	Cyclin-dependent kinase 2-interacting protein (CDK2-interacting protein)	110	300	13	0.0437	Cargo B	Nucleus		24.324		B2_2	3762
OCAD1_HUMAN	OCIA domain-containing protein 1 (Ovarian carcinoma immunoreactive antigen)	110	300	13	0.0437	Cargo B	Cytoplasm		20.637		B2_2	4244
PRP4B_HUMAN	Serine/threonine-protein kinase PRP4 homolog (EC 2.7.11.1) (PRP4 kinase) (PRP4 pre-mRNA-processing factor 4 homolog)	110	300	13	0.0437	Cargo B	Nucleus		116.99		B2_2	2021
RPGF2_HUMAN	Rap guanine nucleotide exchange factor 2 (Cyclic nucleotide ras GEF) (CNrasGEF) (Neural RAP guanine nucleotide exchange protein) (nRap GEP) (PDZ domain-containing guanine nucleotide exchange factor 1) (PDZ-GEF1) (RA-GEF-1) (Ras/Rap1-associating GEF-1)	110	300	13	0.0437	Cargo B	Cytoplasm		167.41		B2_2	4712
TMA16_HUMAN	Translation machinery-associated protein 16	110	300	13	0.0437	Cargo B			23.864		B2_2	3418
WDR43_HUMAN	WD repeat-containing protein 43	110	300	13	0.0437	Cargo B	Nucleus		74.89		B2_2	2186
PNO1_HUMAN	RNA-binding protein PNO1	310	290	38	0.132	Cargo B	Nucleus	Thakar&Karaca	27.924		B2_2	4145
FBW10_HUMAN	F-box/WD repeat-containing protein 10 (F-box and WD-40 domain-containing protein 10) (Ubiquitin ligase-specificity factor)	270	280	34	0.121	Cargo B			113.98		B2_2	2508
AMOL2_HUMAN	Angiomotin-like protein 2 (Leman coiled-coil protein) (LCCP)	99	280	12	0.0437	Cargo B	Cytoplasm		85.834		B2_2	4624
CN080_HUMAN	Uncharacterized protein C14orf80	100	280	12	0.0437	Cargo B			43.353		B2_2	2775
FBXW5_HUMAN	F-box/WD repeat-containing protein 5 (F-box and WD-40 domain-containing protein 5)	100	280	12	0.0437	Cargo B	Cytoplasm		63.922		B2_2	3318
GPTC2_HUMAN	G patch domain-containing protein 2	100	280	12	0.0437	Cargo B			58.943		B2_2	4217
IQEC2_HUMAN	IQ motif and SEC7 domain-containing protein 2	97	270	12	0.0437	Cargo B	Cytoplasm		105.1		B2_2	2419
MTO1_HUMAN	Protein MTO1 homolog, mitochondrial	97	270	12	0.0437	Cargo B	Cytoplasm		77.3	MT	B2_2	4651
RED_HUMAN	Protein Red (Cytokine IK) (IK factor) (Protein RER)	340	260	41	0.16	Cargo B	Nucleus		65.601		B2_2	1962
CIR1A_HUMAN	Cirhin	91	260	11	0.0437	Cargo B	Nucleus		76.889		B2_2	3322
IVD_HUMAN	Isovaleryl-CoA dehydrogenase, mitochondrial (IVD) (EC 1.3.8.4)	40	260	11	0.0437	Cargo B	Cytoplasm		46.319	MT	B2_2	1054
RNF10_HUMAN	RING finger protein 10	93	260	11	0.0437	Cargo B	Both		89.926		B2_2	2992
CDT1_HUMAN	DNA replication factor Cdt1 (Double parked homolog) (DUP)	90	250	11	0.0437	Cargo B	Nucleus		60.39		B2_2	3894
MCRS1_HUMAN	Microspherule protein 1 (58 kDa microspherule protein) (Cell cycle-regulated factor p78) (INO80 complex subunit J) (MCRS2)	89	250	11	0.0437	Cargo B	Nucleus		31.133		B2_2	3421
PRSR2_HUMAN	Proline and serine-rich protein 2	89	250	11	0.0437	Cargo B			45.801		B2_2	2830
SPAT2_HUMAN	Spermatogenesis-associated protein 2 (Spermatogenesis-associated protein PD1)	91	250	11	0.0437	Cargo B	Nucleus		58.427		B2_2	4533
T2H2L_HUMAN	General transcription factor IIH subunit 2-like protein (General transcription factor IIH polypeptide 2-like protein)	90	250	11	0.0437	Cargo B	Nucleus		44.452		B2_2	2061
WDR74_HUMAN	WD repeat-containing protein 74 (NOP seven-associated protein 1)	88	250	11	0.0437	Cargo B	Nucleus		42.441		B2_2	2619
RN219_HUMAN	RING finger protein 219	86	240	11	0.0437	Cargo B			81.116		B2_2	2505
ACAP3_HUMAN	Arf-GAP with coiled-coil, ANK repeat and PH domain-containing protein 3 (Centaurin-beta-5) (Cnt-b5)	84	230	10	0.0437	Cargo B			92.494		B2_2	3531
CN119_HUMAN	Uncharacterized protein C14orf119	390	210	47	0.227	Cargo B	Cytoplasm		16.009		B2_2	4224
MSPD2_HUMAN	Motile sperm domain-containing protein 2	180	190	21	0.116	Cargo B	Cytoplasm		59.745	TM	B2_2	3079
TTF2_HUMAN	Transcription termination factor 2 (EC 3.6.4.-) (Lodestar homolog) (RNA polymerase II termination factor) (Transcription release factor 2) (F2) (HuF2)	20	150	41	0.271	Cargo B	Both		129.59		B2_2	4556
CBPC1_HUMAN	Cytosolic carboxypeptidase 1 (EC 3.4.17.-) (ATP/GTP-binding protein 1) (Nervous system nuclear protein induced by axotomy protein 1 homolog)	290	150	36	0.243	Cargo B	Both	Thakar&Karaca	138.45		B2_2	4582
AGO3_HUMAN	Protein argonaute-3 (Argonaute3) (hAgo3) (Argonaute RISC catalytic component 3) (Eukaryotic translation initiation factor 2C 3) (eIF-2C 3) (eIF2C 3)	3.3	150	20	0.133	Cargo B	Cytoplasm		97.359		B2_2	4012
KSR1_HUMAN	Kinase suppressor of Ras 1	270	140	34	0.241	Cargo B	Cytoplasm		102.03		B2_2	2876
SRSF6_HUMAN	Serine/arginine-rich splicing factor 6 (Pre-mRNA-splicing factor SRP55) (Splicing factor, arginine/serine-rich 6)	230	130	28	0.209	Cargo B	Nucleus		38.418		B2_2	1982
SMG7_HUMAN	Protein SMG7 (EST1-like protein C) (SMG-7 homolog) (hSMG-7)	120	130	15	0.114	Cargo B	Both		122.02		B2_2	3225
PER1_HUMAN	Period circadian protein homolog 1 (hPER1) (Circadian clock protein PERIOD 1) (Circadian pacemaker protein Rigui)	370	120	45	0.389	Cargo B	Both	NESdbO	136.21		B2_2	280
LSM11_HUMAN	U7 snRNA-associated Sm-like protein LSm11	110	120	14	0.119	Cargo B	Nucleus		39.499		B2_2	1765
BL1S3_HUMAN	Biogenesis of lysosome-related organelles complex 1 subunit 3 (BLOC-1 subunit 3)	400	100	49	0.471	Cargo B	Cytoplasm		21.255		B2_2	2616
GTSE1_HUMAN	G2 and S phase-expressed protein 1 (GTSE-1) (Protein B99 homolog)	160	100	19	0.183	Cargo B	Cytoplasm		76.644		B2_2	4287
RHG12_HUMAN	Rho GTPase-activating protein 12 (Rho-type GTPase-activating protein 12)	110	100	14	0.133	Cargo B			93.113		B2_2	2896
ABCB5_HUMAN	ATP-binding cassette sub-family B member 5 (ABCB5 P-gp) (P-glycoprotein ABCB5)	81	230	9.9	0.0437	Low Abundant Cargo	Cytoplasm		14.081	TM	C	2319
PNISR_HUMAN	Arginine/serine-rich protein PNISR (PNN-interacting serine/arginine-rich protein) (SR-related protein) (SR-rich protein) (Serine/arginine-rich-splicing regulatory protein 130) (SRrp130) (Splicing factor, arginine/serine-rich 130) (Splicing factor, arginine/serine-rich 18)	81	230	9.9	0.0437	Low Abundant Cargo	Nucleus		92.576		C	3148
3BP2_HUMAN	SH3 domain-binding protein 2 (3BP-2)	79	220	9.7	0.0437	Low Abundant Cargo			62.243		C	1739
APC4_HUMAN	Anaphase-promoting complex subunit 4 (APC4) (Cyclosome subunit 4)	79	220	9.7	0.0437	Low Abundant Cargo			92.115		C	4468
NIPS2_HUMAN	Protein NipSnap homolog 2 (NipSnap2) (Glioblastoma-amplified sequence)	80	220	9.7	0.0437	Low Abundant Cargo			33.742		C	464
PKRI1_HUMAN	PRKR-interacting protein 1	80	220	9.7	0.0437	Low Abundant Cargo	Nucleus		20.997		C	3988
BORA_HUMAN	Protein aurora borealis (HsBora)	78	220	9.6	0.0437	Low Abundant Cargo			61.202		C	2601
RASF1_HUMAN	Ras association domain-containing protein 1	79	220	9.6	0.0437	Low Abundant Cargo	Both		38.813		C	4150
GBB4_HUMAN	Guanine nucleotide-binding protein subunit beta-4 (Transducin beta chain 4)	78	220	9.5	0.0437	Low Abundant Cargo			37.567		C	4031
P4HA2_HUMAN	Prolyl 4-hydroxylase subunit alpha-2 (4-PH alpha-2) (EC 1.14.11.2) (Procollagen-proline,2-oxoglutarate-4-dioxygenase subunit alpha-2)	78	220	9.5	0.0437	Low Abundant Cargo	Cytoplasm		60.632	ER	C	275
FIP1_HUMAN	Pre-mRNA 3'-end-processing factor FIP1 (hFip1) (FIP1-like 1 protein) (Factor interacting with PAP) (Rearranged in hypereosinophilia)	76	210	9.3	0.0437	Low Abundant Cargo	Nucleus		40.834		C	2624
HAX1_HUMAN	HCLS1-associated protein X-1 (HS1-associating protein X-1) (HAX-1) (HS1-binding protein 1) (HSP1BP-1)	76	210	9.3	0.0437	Low Abundant Cargo	Both		26.099		C	123
PRIC3_HUMAN	Prickle-like protein 3 (LIM domain only protein 6) (LMO-6) (Triple LIM domain protein 6)	75	210	9.1	0.0437	Low Abundant Cargo			68.608		C	359
FA98B_HUMAN	Protein FAM98B	74	210	9	0.0437	Low Abundant Cargo	Both		37.19		C	2369
AAAS_HUMAN	Aladin (Adracalin)	73	200	8.9	0.0437	Low Abundant Cargo	Nucleus		59.573		C	4132
DEPD7_HUMAN	DEP domain-containing protein 7 (Protein TR2/D15)	73	200	8.9	0.0437	Low Abundant Cargo			57.705		C	3545
IER5_HUMAN	Immediate early response gene 5 protein	73	200	8.9	0.0437	Low Abundant Cargo			33.703		C	2498
GCP3_HUMAN	Gamma-tubulin complex component 3 (GCP-3) (hGCP3) (Gamma-ring complex protein 104 kDa) (h104p) (hGrip104) (Spindle pole body protein Spc98 homolog) (hSpc98)	72	200	8.8	0.0437	Low Abundant Cargo	Cytoplasm		93.884		C	3378
KI20A_HUMAN	Kinesin-like protein KIF20A (GG10_2) (Mitotic kinesin-like protein 2) (MKlp2) (Rab6-interacting kinesin-like protein) (Rabkinesin-6)	70	200	8.6	0.0437	Low Abundant Cargo	Cytoplasm		100.28		C	584
MFR1L_HUMAN	Mitochondrial fission regulator 1-like	70	200	8.6	0.0437	Low Abundant Cargo			30.77		C	3852
NOL9_HUMAN	Polynucleotide 5'-hydroxyl-kinase NOL9 (EC 2.7.1.-) (Nucleolar protein 9)	70	200	8.6	0.0437	Low Abundant Cargo	Nucleus		79.322		C	2437
RBM33_HUMAN	RNA-binding protein 33 (Proline-rich protein 8) (RNA-binding motif protein 33)	70	200	8.6	0.0437	Low Abundant Cargo			129.98		C	3414
TNKS1_HUMAN	Tankyrase-1 (TANK1) (EC 2.4.2.30) (ADP-ribosyltransferase diphtheria toxin-like 5) (ARTD5) (Poly [ADP-ribose] polymerase 5A) (TNKS-1) (TRF1-interacting ankyrin-related ADP-ribose polymerase) (Tankyrase I)	71	200	8.6	0.0437	Low Abundant Cargo	Both		142.04		C	591
AATF_HUMAN	Protein AATF (Apoptosis-antagonizing transcription factor) (Rb-binding protein Che-1)	70	200	8.5	0.0437	Low Abundant Cargo	Nucleus		63.132		C	4265
ANKS3_HUMAN	Ankyrin repeat and SAM domain-containing protein 3	69	190	8.4	0.0437	Low Abundant Cargo			63.989		C	2669
C170L_HUMAN	Cep170-like protein (CEP170 pseudogene 1)	69	190	8.4	0.0437	Low Abundant Cargo			32.648		C	3503
KCTD5_HUMAN	BTB/POZ domain-containing protein KCTD5	69	190	8.4	0.0437	Low Abundant Cargo	Both		26.092		C	4260
SKT_HUMAN	Sickle tail protein homolog	69	190	8.4	0.0437	Low Abundant Cargo	Cytoplasm		162.36		C	2449
RM12_HUMAN	39S ribosomal protein L12, mitochondrial (L12mt) (MRP-L12) (5c5-2)	68	190	8.3	0.0437	Low Abundant Cargo	Cytoplasm		21.348	MT	C	1498
SMAG1_HUMAN	Protein Smaug homolog 1 (Smaug 1) (hSmaug1) (Sterile alpha motif domain-containing protein 4A) (SAM domain-containing protein 4A)	68	190	8.3	0.0437	Low Abundant Cargo	Both		70.095		C	4580
MPIP2_HUMAN	M-phase inducer phosphatase 2 (EC 3.1.3.48) (Dual specificity phosphatase Cdc25B)	67	190	8.2	0.0437	Low Abundant Cargo	Cytoplasm		60.755		C	1120
AGAP1_HUMAN	Arf-GAP with GTPase, ANK repeat and PH domain-containing protein 1 (AGAP-1) (Centaurin-gamma-2) (Cnt-g2) (GTP-binding and GTPase-activating protein 1) (GGAP1)	66	180	8	0.0437	Low Abundant Cargo	Cytoplasm		89.065		C	4570
MARH7_HUMAN	E3 ubiquitin-protein ligase MARCH7 (EC 6.3.2.-) (Axotrophin) (Membrane-associated RING finger protein 7) (Membrane-associated RING-CH protein VII) (MARCH-VII) (RING finger protein 177)	65	180	8	0.0437	Low Abundant Cargo			78.05		C	4004
TF3C5_HUMAN	General transcription factor 3C polypeptide 5 (TF3C-epsilon) (Transcription factor IIIC 63 kDa subunit) (TFIIIC 63 kDa subunit) (TFIIIC63) (Transcription factor IIIC subunit epsilon)	66	180	8	0.0437	Low Abundant Cargo	Nucleus		58.266		C	4755
BEGIN_HUMAN	Brain-enriched guanylate kinase-associated protein	64	180	7.9	0.0437	Low Abundant Cargo	Cytoplasm		64.802		C	3721
ROGDI_HUMAN	Protein rogdi homolog	65	180	7.9	0.0437	Low Abundant Cargo	Nucleus		32.254		C	3838
LUC7L_HUMAN	Putative RNA-binding protein Luc7-like 1 (Putative SR protein LUC7B1) (SR+89)	64	180	7.8	0.0437	Low Abundant Cargo			38.405		C	4092
MSH5_HUMAN	MutS protein homolog 5 (hMSH5)	63	180	7.8	0.0437	Low Abundant Cargo		NESdbH	92.874		C	291
NCOA4_HUMAN	Nuclear receptor coactivator 4 (NCoA-4) (Androgen receptor coactivator 70 kDa protein) (70 kDa AR-activator) (70 kDa androgen receptor coactivator) (Androgen receptor-associated protein of 70 kDa) (Ret-activating protein ELE1)	63	180	7.7	0.0437	Low Abundant Cargo			69.725		C	2052
ARRD1_HUMAN	Arrestin domain-containing protein 1	63	170	7.6	0.0437	Low Abundant Cargo			45.981		C	2989
TRAK1_HUMAN	Trafficking kinesin-binding protein 1 (106 kDa O-GlcNAc transferase-interacting protein)	62	170	7.6	0.0437	Low Abundant Cargo	Both		106.04		C	4581
CC28A_HUMAN	Coiled-coil domain-containing protein 28A (CCRL1AP)	61	170	7.4	0.0437	Low Abundant Cargo			30.366		C	2889
CYLD_HUMAN	Ubiquitin carboxyl-terminal hydrolase CYLD (EC 3.4.19.12) (Deubiquitinating enzyme CYLD) (Ubiquitin thioesterase CYLD) (Ubiquitin-specific-processing protease CYLD)	61	170	7.4	0.0437	Low Abundant Cargo	Cytoplasm		107.04		C	4097
PAN3_HUMAN	PAB-dependent poly(A)-specific ribonuclease subunit PAN3 (PAB1P-dependent poly(A)-nuclease) (PAN deadenylation complex subunit 3) (hPan3)	60	170	7.4	0.0437	Low Abundant Cargo	Cytoplasm		64.464		C	2394
RN138_HUMAN	E3 ubiquitin-protein ligase RNF138 (EC 6.3.2.-) (Nemo-like kinase-associated RING finger protein) (NLK-associated RING finger protein) (hNARF) (RING finger protein 138)	61	170	7.4	0.0437	Low Abundant Cargo			17.262		C	3180
AVPI1_HUMAN	Arginine vasopressin-induced protein 1 (AVP-induced protein 1)	60	170	7.3	0.0437	Low Abundant Cargo			16.773		C	2452
PRCC_HUMAN	Proline-rich protein PRCC (Papillary renal cell carcinoma translocation-associated gene protein)	59	170	7.2	0.0437	Low Abundant Cargo	Nucleus		52.417		C	3251
CP110_HUMAN	Centriolar coiled-coil protein of 110 kDa (Centrosomal protein of 110 kDa) (CP110) (Cep110)	58	160	7.1	0.0437	Low Abundant Cargo	Cytoplasm		113.42		C	299
EID1_HUMAN	EP300-interacting inhibitor of differentiation 1 (21 kDa pRb-associated protein) (CREBBP/EP300 inhibitory protein 1) (E1A-like inhibitor of differentiation 1) (EID-1)	59	160	7.1	0.0437	Low Abundant Cargo	Both		18.616		C	4782
RASF3_HUMAN	Ras association domain-containing protein 3	58	160	7.1	0.0437	Low Abundant Cargo	Cytoplasm		27.562		C	2827
CB068_HUMAN	UPF0561 protein C2orf68	57	160	7	0.0437	Low Abundant Cargo			14.48		C	2323
NEDD1_HUMAN	Protein NEDD1 (Neural precursor cell expressed developmentally down-regulated protein 1) (NEDD-1)	57	160	7	0.0437	Low Abundant Cargo	Cytoplasm		62.379		C	3081
CTNB1_HUMAN	Catenin beta-1 (Beta-catenin)	56	160	6.9	0.0437	Low Abundant Cargo	Both		85.496		C	1182
RL21_HUMAN	60S ribosomal protein L21	56	160	6.8	0.0437	Low Abundant Cargo		Thakar&Karaca	18.565		C	1327
CE034_HUMAN	Uncharacterized protein C5orf34	54	150	6.7	0.0437	Low Abundant Cargo			72.897		C	3514
HPCL1_HUMAN	Hippocalcin-like protein 1 (Calcium-binding protein BDR-1) (HLP2) (Visinin-like protein 3) (VILIP-3)	54	150	6.6	0.0437	Low Abundant Cargo			22.313		C	1227
RBM4_HUMAN	RNA-binding protein 4 (Lark homolog) (hLark) (RNA-binding motif protein 4) (RNA-binding motif protein 4a)	54	150	6.6	0.0437	Low Abundant Cargo	Both		40.313		C	3769
RPRD2_HUMAN	Regulation of nuclear pre-mRNA domain-containing protein 2	54	150	6.6	0.0437	Low Abundant Cargo			152.87		C	2482
SNX18_HUMAN	Sorting nexin-18 (SH3 and PX domain-containing protein 3B) (Sorting nexin-associated Golgi protein 1)	54	150	6.6	0.0437	Low Abundant Cargo	Cytoplasm		64.751		C	3553
SPICE_HUMAN	Spindle and centriole-associated protein 1 (Coiled-coil domain-containing protein 52) (Spindle and centriole-associated protein)	54	150	6.6	0.0437	Low Abundant Cargo	Cytoplasm		96.263		C	2948
SRSF7_HUMAN	Serine/arginine-rich splicing factor 7 (Splicing factor 9G8) (Splicing factor, arginine/serine-rich 7)	54	150	6.6	0.0437	Low Abundant Cargo	Both		15.257		C	2291
PTPC1_HUMAN	Protein tyrosine phosphatase domain-containing protein 1 (EC 3.1.3.-)	53	150	6.5	0.0437	Low Abundant Cargo			84.456		C	5
SNX16_HUMAN	Sorting nexin-16	53	150	6.5	0.0437	Low Abundant Cargo	Cytoplasm		35.566		C	1583
FBXW8_HUMAN	F-box/WD repeat-containing protein 8 (F-box and WD-40 domain-containing protein 8) (F-box only protein 29)	52	140	6.3	0.0437	Low Abundant Cargo	Cytoplasm		67.393		C	2977
M3K3_HUMAN	Mitogen-activated protein kinase kinase kinase 3 (EC 2.7.11.25) (MAPK/ERK kinase kinase 3) (MEK kinase 3) (MEKK 3)	51	140	6.3	0.0437	Low Abundant Cargo			70.897		C	3624
RCL1_HUMAN	RNA 3'-terminal phosphate cyclase-like protein	51	140	6.3	0.0437	Low Abundant Cargo	Nucleus		40.842		C	4634
SPF45_HUMAN	Splicing factor 45 (45 kDa-splicing factor) (RNA-binding motif protein 17)	51	140	6.3	0.0437	Low Abundant Cargo	Nucleus		44.961		C	3468
4ET_HUMAN	Eukaryotic translation initiation factor 4E transporter (4E-T) (eIF4E transporter) (Eukaryotic translation initiation factor 4E nuclear import factor 1)	51	140	6.2	0.0437	Low Abundant Cargo	Both	NESdbH	108.2		C	4123
GPT2L_HUMAN	G patch domain-containing protein 2-like	51	140	6.2	0.0437	Low Abundant Cargo			53.895		C	4223
REEP4_HUMAN	Receptor expression-enhancing protein 4	51	140	6.2	0.0437	Low Abundant Cargo	Cytoplasm		29.395	TM	C	3955
RU17_HUMAN	U1 small nuclear ribonucleoprotein 70 kDa (U1 snRNP 70 kDa) (U1-70K) (snRNP70)	51	140	6.2	0.0437	Low Abundant Cargo	Nucleus		51.556		C	785
TFPT_HUMAN	TCF3 fusion partner (INO80 complex subunit F) (Protein FB1)	50	140	6.1	0.0437	Low Abundant Cargo	Nucleus		28.278		C	812
TRAK2_HUMAN	Trafficking kinesin-binding protein 2 (Amyotrophic lateral sclerosis 2 chromosomal region candidate gene 3 protein)	50	140	6.1	0.0437	Low Abundant Cargo	Cytoplasm		101.42		C	373
DUS7_HUMAN	Dual specificity protein phosphatase 7 (EC 3.1.3.16) (EC 3.1.3.48) (Dual specificity protein phosphatase PYST2)	48	140	5.9	0.0437	Low Abundant Cargo	Cytoplasm		40.55		C	2303
DVL1_HUMAN	Segment polarity protein dishevelled homolog DVL-1 (Dishevelled-1) (DSH homolog 1)	48	140	5.9	0.0437	Low Abundant Cargo	Cytoplasm		72.88		C	185
SEMG1_HUMAN	Semenogelin-1 (Semenogelin I) (SGI) [Cleaved into: Alpha-inhibin-92; Alpha-inhibin-31; Seminal basic protein]	49	140	5.9	0.0437	Low Abundant Cargo	Other		52.13	ER	C	709
WDTC1_HUMAN	WD and tetratricopeptide repeats protein 1	48	140	5.9	0.0437	Low Abundant Cargo			67.46		C	2988
MIS12_HUMAN	Protein MIS12 homolog	48	130	5.9	0.0437	Low Abundant Cargo	Nucleus		24.14		C	3857
SNPC2_HUMAN	snRNA-activating protein complex subunit 2 (SNAPc subunit 2) (Proximal sequence element-binding transcription factor subunit delta) (PSE-binding factor subunit delta) (PTF subunit delta) (Small nuclear RNA-activating complex polypeptide 2) (snRNA-activating protein complex 45 kDa subunit) (SNAPc 45 kDa subunit)	48	130	5.9	0.0437	Low Abundant Cargo	Nucleus		35.556		C	2017
AURKB_HUMAN	Aurora kinase B (EC 2.7.11.1) (Aurora 1) (Aurora- and IPL1-like midbody-associated protein 1) (AIM-1) (Aurora/IPL1-related kinase 2) (ARK-2) (Aurora-related kinase 2) (STK-1) (Serine/threonine-protein kinase 12) (Serine/threonine-protein kinase 5) (Serine/threonine-protein kinase aurora-B)	47	130	5.8	0.0437	Low Abundant Cargo	Both		39.31		C	3447
FANCG_HUMAN	Fanconi anemia group G protein (Protein FACG) (DNA repair protein XRCC9)	48	130	5.8	0.0437	Low Abundant Cargo	Both		68.553		C	260
CC174_HUMAN	Coiled-coil domain-containing protein 174	47	130	5.7	0.0437	Low Abundant Cargo			53.957		C	2607
TIAR_HUMAN	Nucleolysin TIAR (TIA-1-related protein)	47	130	5.7	0.0437	Low Abundant Cargo	Both		41.59		C	1798
APC10_HUMAN	Anaphase-promoting complex subunit 10 (APC10) (Cyclosome subunit 10)	45	130	5.5	0.0437	Low Abundant Cargo		Thakar&Karaca	21.252		C	4529
RNPS1_HUMAN	RNA-binding protein with serine-rich domain 1 (SR-related protein LDC2)	45	130	5.5	0.0437	Low Abundant Cargo	Both		30.354		C	2204
SMCE1_HUMAN	SWI/SNF-related matrix-associated actin-dependent regulator of chromatin subfamily E member 1 (BRG1-associated factor 57) (BAF57)	45	130	5.5	0.0437	Low Abundant Cargo	Nucleus		34.39		C	3300
Thakar&KaracaL2_HUMAN	Lethal(3)malignant brain tumor-like protein 2 (H-l(3)mbt-like protein 2) (L(3)mbt-like protein 2)	45	130	5.5	0.0437	Low Abundant Cargo	Nucleus		79.109		C	3311
CO039_HUMAN	Uncharacterized protein C15orf39	44	120	5.4	0.0437	Low Abundant Cargo			99.212		C	2651
GNPAT_HUMAN	Dihydroxyacetone phosphate acyltransferase (DAP-AT) (DHAP-AT) (EC 2.3.1.42) (Acyl-CoA:dihydroxyacetonephosphateacyltransferase) (Glycerone-phosphate O-acyltransferase)	44	120	5.4	0.0437	Low Abundant Cargo	Cytoplasm		77.187		C	256
MED12_HUMAN	Mediator of RNA polymerase II transcription subunit 12 (Activator-recruited cofactor 240 kDa component) (ARC240) (CAG repeat protein 45) (Mediator complex subunit 12) (OPA-containing protein) (Thyroid hormone receptor-associated protein complex 230 kDa component) (Trap230) (Trinucleotide repeat-containing gene 11 protein)	44	120	5.4	0.0437	Low Abundant Cargo	Nucleus		242.95		C	3296
PLK2_HUMAN	Serine/threonine-protein kinase PLK2 (EC 2.7.11.21) (Polo-like kinase 2) (PLK-2) (hPlk2) (Serine/threonine-protein kinase SNK) (hSNK) (Serum-inducible kinase)	45	120	5.4	0.0437	Low Abundant Cargo	Cytoplasm		78.236		C	4286
FBXL4_HUMAN	F-box/LRR-repeat protein 4 (F-box and leucine-rich repeat protein 4) (F-box protein FBL4/FBL5)	43	120	5.3	0.0437	Low Abundant Cargo	Both		70.096		C	4481
FRM4B_HUMAN	FERM domain-containing protein 4B (GRP1-binding protein GRSP1)	44	120	5.3	0.0437	Low Abundant Cargo	Cytoplasm		111.63		C	4631
LZTS2_HUMAN	Leucine zipper putative tumor suppressor 2 (hLZTS2) (Protein LAPSER1)	42	120	5.2	0.0437	Low Abundant Cargo	Cytoplasm	NESdbH	72.759		C	3671
NOP58_HUMAN	Nucleolar protein 58 (Nucleolar protein 5)	41	120	5.1	0.0437	Low Abundant Cargo	Nucleus		59.578		C	4645
PRKX_HUMAN	cAMP-dependent protein kinase catalytic subunit PRKX (PrKX) (Protein kinase X) (Protein kinase X-linked) (Serine/threonine-protein kinase PRKX) (EC 2.7.11.1) (Protein kinase PKX1)	41	110	5	0.0437	Low Abundant Cargo	Both		40.895		C	1468
DMWD_HUMAN	Dystrophia myotonica WD repeat-containing protein (Dystrophia myotonica-containing WD repeat motif protein) (Protein 59) (Protein DMR-N9)	40	110	4.9	0.0437	Low Abundant Cargo			70.437		C	1902
K0556_HUMAN	Uncharacterized protein KIAA0556	40	110	4.9	0.0437	Low Abundant Cargo			180.92		C	374
NONO_HUMAN	Non-POU domain-containing octamer-binding protein (NonO protein) (54 kDa nuclear RNA- and DNA-binding protein) (55 kDa nuclear protein) (DNA-binding p52/p100 complex, 52 kDa subunit) (NMT55) (p54(nrb)) (p54nrb)	40	110	4.9	0.0437	Low Abundant Cargo	Nucleus		43.866		C	2198
SLU7_HUMAN	Pre-mRNA-splicing factor SLU7 (hSlu7)	40	110	4.9	0.0437	Low Abundant Cargo	Both	Thakar&Karaca	68.386		C	606
UTP18_HUMAN	U3 small nucleolar RNA-associated protein 18 homolog (WD repeat-containing protein 50)	40	110	4.9	0.0437	Low Abundant Cargo	Nucleus		62.003		C	4745
ZBED3_HUMAN	Zinc finger BED domain-containing protein 3 (Axin-interacting protein)	40	110	4.9	0.0437	Low Abundant Cargo	Cytoplasm		25.132		C	3473
NIPS1_HUMAN	Protein NipSnap homolog 1 (NipSnap1)	39	110	4.8	0.0437	Low Abundant Cargo			33.31		C	3636
NOC4L_HUMAN	Nucleolar complex protein 4 homolog (NOC4 protein homolog) (NOC4-like protein) (Nucleolar complex-associated protein 4-like protein)	40	110	4.8	0.0437	Low Abundant Cargo	Both		58.467	TM	C	3746
XRN1_HUMAN	5'-3' exoribonuclease 1 (EC 3.1.13.-) (Strand-exchange protein 1 homolog)	39	110	4.8	0.0437	Low Abundant Cargo	Cytoplasm		192.84		C	2938
ERI1_HUMAN	3'-5' exoribonuclease 1 (EC 3.1.-.-) (3'-5' exonuclease ERI1) (Eri-1 homolog) (Histone mRNA 3'-end-specific exoribonuclease) (Histone mRNA 3'-exonuclease 1) (Protein 3'hExo) (HEXO)	38	110	4.7	0.0437	Low Abundant Cargo	Both		40.063		C	2871
EVL_HUMAN	Ena/VASP-like protein (Ena/vasodilator-stimulated phosphoprotein-like)	38	110	4.7	0.0437	Low Abundant Cargo	Cytoplasm		44.619		C	4434
SPA2L_HUMAN	Spermatogenesis-associated protein 2-like protein (SPATA2-like protein)	39	110	4.7	0.0437	Low Abundant Cargo			46.178		C	2866
PALMD_HUMAN	Palmdelphin (Paralemmin-like protein)	38	110	4.6	0.0437	Low Abundant Cargo	Cytoplasm		62.757		C	4078
RFIP1_HUMAN	Rab11 family-interacting protein 1 (Rab11-FIP1) (Rab-coupling protein)	38	110	4.6	0.0437	Low Abundant Cargo	Cytoplasm		137.17		C	2638
TOB2_HUMAN	Protein Tob2 (Protein Tob4) (Transducer of erbB-2 2)	38	110	4.6	0.0437	Low Abundant Cargo	Cytoplasm		36.632		C	2071
FKBPL_HUMAN	FK506-binding protein-like (WAF-1/CIP1 stabilizing protein 39) (WISp39)	37	100	4.6	0.0437	Low Abundant Cargo			38.176		C	4449
SRSF5_HUMAN	Serine/arginine-rich splicing factor 5 (Delayed-early protein HRS) (Pre-mRNA-splicing factor SRP40) (Splicing factor, arginine/serine-rich 5)	37	100	4.6	0.0437	Low Abundant Cargo	Nucleus		30.858		C	1981
STX1A_HUMAN	Syntaxin-1A (Neuron-specific antigen HPC-1)	37	100	4.5	0.0437	Low Abundant Cargo	Cytoplasm		28.994	TM	C	2290
CA174_HUMAN	UPF0688 protein C1orf174	36	100	4.4	0.0437	Low Abundant Cargo	Nucleus		25.977		C	2927
HM20B_HUMAN	SWI/SNF-related matrix-associated actin-dependent regulator of chromatin subfamily E member 1-related (SMARCE1-related protein) (BRCA2-associated factor 35) (HMG box-containing protein 20B) (HMG domain-containing protein 2) (HMG domain-containing protein HMGX2) (Sox-like transcriptional factor) (Structural DNA-binding protein BRAF35)	35	98	4.3	0.0437	Low Abundant Cargo	Nucleus		24.713		C	4325
XRCC3_HUMAN	DNA repair protein XRCC3 (X-ray repair cross-complementing protein 3)	35	98	4.3	0.0437	Low Abundant Cargo	Both		37.849		C	324
UBP46_HUMAN	Ubiquitin carboxyl-terminal hydrolase 46 (EC 3.4.19.12) (Deubiquitinating enzyme 46) (Ubiquitin thioesterase 46) (Ubiquitin-specific-processing protease 46)	35	97	4.3	0.0437	Low Abundant Cargo			26.243		C	1644
AMER1_HUMAN	APC membrane recruitment protein 1 (Amer1) (Protein FAM123B) (Wilms tumor gene on the X chromosome protein)	35	97	4.2	0.0437	Low Abundant Cargo	Both		124.03		C	2415
SNRK_HUMAN	SNF-related serine/threonine-protein kinase (EC 2.7.11.1) (SNF1-related kinase)	35	97	4.2	0.0437	Low Abundant Cargo	Nucleus		84.275		C	4134
TF3C3_HUMAN	General transcription factor 3C polypeptide 3 (Transcription factor IIIC 102 kDa subunit) (TFIIIC 102 kDa subunit) (TFIIIC102) (Transcription factor IIIC subunit gamma) (TF3C-gamma)	34	95	4.2	0.0437	Low Abundant Cargo	Nucleus		101.27		C	4756
DAAF3_HUMAN	Dynein assembly factor 3, axonemal	34	95	4.1	0.0437	Low Abundant Cargo	Cytoplasm		59.41		C	3018
TRIP4_HUMAN	Activating signal cointegrator 1 (ASC-1) (Thyroid receptor-interacting protein 4) (TR-interacting protein 4) (TRIP-4)	34	95	4.1	0.0437	Low Abundant Cargo	Both		66.145		C	2248
DOCK6_HUMAN	Dedicator of cytokinesis protein 6	33	93	4.1	0.0437	Low Abundant Cargo	Cytoplasm		229.56		C	3465
HNRH3_HUMAN	Heterogeneous nuclear ribonucleoprotein H3 (hnRNP H3) (Heterogeneous nuclear ribonucleoprotein 2H9) (hnRNP 2H9)	33	93	4.1	0.0437	Low Abundant Cargo	Nucleus		31.525		C	1146
ADAS_HUMAN	Alkyldihydroxyacetonephosphate synthase, peroxisomal (Alkyl-DHAP synthase) (EC 2.5.1.26) (Aging-associated gene 5 protein) (Alkylglycerone-phosphate synthase)	33	92	4	0.0437	Low Abundant Cargo	Cytoplasm		72.911	MT	C	114
PDE8B_HUMAN	High affinity cAMP-specific and IBMX-insensitive 3',5'-cyclic phosphodiesterase 8B (HsPDE8B) (EC 3.1.4.53) (Cell proliferation-inducing gene 22 protein)	33	92	4	0.0437	Low Abundant Cargo			87.973		C	590
STXB3_HUMAN	Syntaxin-binding protein 3 (Platelet Sec1 protein) (PSP) (Protein unc-18 homolog 3) (Unc18-3) (Protein unc-18 homolog C) (Unc-18C)	33	92	4	0.0437	Low Abundant Cargo	Cytoplasm		67.764		C	126
GFOD2_HUMAN	Glucose-fructose oxidoreductase domain-containing protein 2 (EC 1.-.-.-)	32	90	3.9	0.0437	Low Abundant Cargo	Other		42.254	ER	C	2341
AN13A_HUMAN	Ankyrin repeat domain-containing protein 13A (Protein KE03)	32	89	3.9	0.0437	Low Abundant Cargo	Cytoplasm		67.618		C	2931
GFOD1_HUMAN	Glucose-fructose oxidoreductase domain-containing protein 1 (EC 1.-.-.-)	32	89	3.9	0.0437	Low Abundant Cargo	Other		43.157	ER	C	4250
SOX13_HUMAN	Transcription factor SOX-13 (Islet cell antigen 12) (SRY (Sex determining region Y)-box 13) (Type 1 diabetes autoantigen ICA12)	32	89	3.9	0.0437	Low Abundant Cargo	Nucleus		69.228		C	4544
NCS1_HUMAN	Neuronal calcium sensor 1 (NCS-1) (Frequenin homolog) (Frequenin-like protein) (Frequenin-like ubiquitous protein)	32	88	3.9	0.0437	Low Abundant Cargo	Cytoplasm		21.878		C	1650
ARHG3_HUMAN	Rho guanine nucleotide exchange factor 3 (Exchange factor found in platelets and leukemic and neuronal tissues) (XPLN)	31	87	3.8	0.0437	Low Abundant Cargo	Cytoplasm		59.782		C	4122
DCP1B_HUMAN	mRNA-decapping enzyme 1B (EC 3.-.-.-)	31	86	3.8	0.0437	Low Abundant Cargo	Both		67.722		C	2936
M3K1_HUMAN	Mitogen-activated protein kinase kinase kinase 1 (EC 2.7.11.25) (MAPK/ERK kinase kinase 1) (MEK kinase 1) (MEKK 1)	31	86	3.8	0.0437	Low Abundant Cargo			164.47		C	1980
PAR12_HUMAN	Poly [ADP-ribose] polymerase 12 (PARP-12) (EC 2.4.2.30) (ADP-ribosyltransferase diphtheria toxin-like 12) (ARTD12) (Zinc finger CCCH domain-containing protein 1)	31	86	3.7	0.0437	Low Abundant Cargo	Nucleus		79.063		C	3869
IF2B1_HUMAN	Insulin-like growth factor 2 mRNA-binding protein 1 (IGF2 mRNA-binding protein 1) (IMP-1) (IMP1) (Coding region determinant-binding protein) (CRD-BP) (IGF-II mRNA-binding protein 1) (VICKZ family member 1) (Zipcode-binding protein 1) (ZBP-1)	30	85	3.7	0.0437	Low Abundant Cargo	Both		63.48		C	4297
KHNYN_HUMAN	Protein KHNYN (KH and NYN domain-containing protein)	30	84	3.7	0.0437	Low Abundant Cargo			74.533		C	234
MTMRD_HUMAN	Myotubularin-related protein 13 (SET-binding factor 2)	30	84	3.7	0.0437	Low Abundant Cargo	Cytoplasm		208.46		C	2826
PCGF5_HUMAN	Polycomb group RING finger protein 5 (RING finger protein 159)	30	84	3.7	0.0437	Low Abundant Cargo	Nucleus		29.714		C	2773
ETV3_HUMAN	ETS translocation variant 3 (ETS domain transcriptional repressor PE1) (PE-1) (Mitogenic Ets transcriptional suppressor)	30	83	3.6	0.0437	Low Abundant Cargo	Nucleus		57.001		C	1261
RASF7_HUMAN	Ras association domain-containing protein 7 (HRAS1-related cluster protein 1)	29	81	3.5	0.0437	Low Abundant Cargo	Cytoplasm		34.66		C	1825
TNIK_HUMAN	TRAF2 and NCK-interacting protein kinase (EC 2.7.11.1)	28	79	3.4	0.0437	Low Abundant Cargo	Both		150.36		C	4487
MKS1_HUMAN	Meckel syndrome type 1 protein	27	76	3.3	0.0437	Low Abundant Cargo	Cytoplasm		59.868		C	4249
PAP1L_HUMAN	Polyadenylate-binding protein 1-like	27	76	3.3	0.0437	Low Abundant Cargo		Thakar&Karaca	68.392		C	2367
DPTOR_HUMAN	DEP domain-containing mTOR-interacting protein (DEP domain-containing protein 6)	27	74	3.2	0.0437	Low Abundant Cargo			34.005		C	3098
FBRL_HUMAN	rRNA 2'-O-methyltransferase fibrillarin (EC 2.1.1.-) (34 kDa nucleolar scleroderma antigen) (Histone-glutamine methyltransferase)	26	73	3.2	0.0437	Low Abundant Cargo	Nucleus		33.784		C	992
NFX1_HUMAN	Transcriptional repressor NF-X1 (EC 6.3.2.-) (Nuclear transcription factor, X box-binding protein 1)	26	73	3.2	0.0437	Low Abundant Cargo	Nucleus		113.62		C	1948
PLD2_HUMAN	Phospholipase D2 (PLD 2) (hPLD2) (EC 3.1.4.4) (Choline phosphatase 2) (PLD1C) (Phosphatidylcholine-hydrolyzing phospholipase D2)	26	73	3.2	0.0437	Low Abundant Cargo	Cytoplasm		38.251		C	221
TBC12_HUMAN	TBC1 domain family member 12	26	73	3.2	0.0437	Low Abundant Cargo			85.625		C	384
HP1B3_HUMAN	Heterochromatin protein 1-binding protein 3 (Protein HP1-BP74)	25	71	3.1	0.0437	Low Abundant Cargo	Nucleus		61.206		C	2431
BTBD7_HUMAN	BTB/POZ domain-containing protein 7	25	70	3.1	0.0437	Low Abundant Cargo	Nucleus		85.545		C	4332
EXOS5_HUMAN	Exosome complex component RRP46 (Chronic myelogenous leukemia tumor antigen 28) (Exosome component 5) (Ribosomal RNA-processing protein 46) (p12B)	25	70	3	0.0437	Low Abundant Cargo	Both		25.249		C	4102
BBS10_HUMAN	Bardet-Biedl syndrome 10 protein	24	67	2.9	0.0437	Low Abundant Cargo	Cytoplasm		80.837		C	3090
ERG7_HUMAN	Lanosterol synthase (EC 5.4.99.7) (2,3-epoxysqualene--lanosterol cyclase) (Oxidosqualene--lanosterol cyclase) (OSC) (hOSC)	24	66	2.9	0.0437	Low Abundant Cargo	Cytoplasm		82.198		C	1353
MYPR_HUMAN	Myelin proteolipid protein (PLP) (Lipophilin)	23	64	2.8	0.0437	Low Abundant Cargo	Cytoplasm		26.274	TM	C	1591
DDX47_HUMAN	Probable ATP-dependent RNA helicase DDX47 (EC 3.6.4.13) (DEAD box protein 47)	22	62	2.7	0.0437	Low Abundant Cargo	Nucleus		45.169		C	3877
EID2_HUMAN	EP300-interacting inhibitor of differentiation 2 (EID-2) (CREBBP/EP300 inhibitor 2) (EID-1-like inhibitor of differentiation 2)	22	62	2.7	0.0437	Low Abundant Cargo	Nucleus		20.856		C	2996
SETD2_HUMAN	Histone-lysine N-methyltransferase SETD2 (EC 2.1.1.43) (HIF-1) (Huntingtin yeast partner B) (Huntingtin-interacting protein 1) (HIP-1) (Huntingtin-interacting protein B) (Lysine N-methyltransferase 3A) (SET domain-containing protein 2) (hSET2) (p231HBP)	22	62	2.7	0.0437	Low Abundant Cargo	Nucleus		287.59		C	3798
KLDC3_HUMAN	Kelch domain-containing protein 3 (Protein Peas) (Testis intracellular mediator protein)	22	60	2.6	0.0437	Low Abundant Cargo	Cytoplasm		43.087		C	3649
NFS1_HUMAN	Cysteine desulfurase, mitochondrial (EC 2.8.1.7)	21	60	2.6	0.0437	Low Abundant Cargo	Both		44.017	MT	C	4779
SNR40_HUMAN	U5 small nuclear ribonucleoprotein 40 kDa protein (U5 snRNP 40 kDa protein) (U5-40K) (38 kDa-splicing factor) (Prp8-binding protein) (hPRP8BP) (U5 snRNP-specific 40 kDa protein) (WD repeat-containing protein 57)	21	60	2.6	0.0437	Low Abundant Cargo	Nucleus		39.31		C	3387
ADIP_HUMAN	Afadin- and alpha-actinin-binding protein (ADIP) (Afadin DIL domain-interacting protein) (SSX2-interacting protein)	21	59	2.6	0.0437	Low Abundant Cargo	Both		65.493		C	4614
CE350_HUMAN	Centrosome-associated protein 350 (Cep350) (Centrosome-associated protein of 350 kDa)	21	59	2.6	0.0437	Low Abundant Cargo	Both		350.93		C	2480
HEXI2_HUMAN	Protein HEXIM2 (Hexamethylene bis-acetamide-inducible protein 2)	21	59	2.6	0.0437	Low Abundant Cargo	Nucleus		32.418		C	3513
SPAS2_HUMAN	Spermatogenesis-associated serine-rich protein 2 (Serine-rich spermatocytes and round spermatid 59 kDa protein) (p59scr)	21	59	2.6	0.0437	Low Abundant Cargo	Cytoplasm		59.544		C	2846
RHOF_HUMAN	Rho-related GTP-binding protein RhoF (Rho family GTPase Rif) (Rho in filopodia)	20	56	2.5	0.0437	Low Abundant Cargo	Cytoplasm		23.625		C	4043
SCHI1_HUMAN	Schwannomin-interacting protein 1 (SCHIP-1)	20	56	2.5	0.0437	Low Abundant Cargo	Cytoplasm		52.079		C	4326
AIFM2_HUMAN	Apoptosis-inducing factor 2 (EC 1.-.-.-) (Apoptosis-inducing factor homologous mitochondrion-associated inducer of death) (Apoptosis-inducing factor-like mitochondrion-associated inducer of death) (p53-responsive gene 3 protein)	20	55	2.4	0.0437	Low Abundant Cargo	Cytoplasm		40.526	TM	C	3678
PHLB1_HUMAN	Pleckstrin homology-like domain family B member 1 (Protein LL5-alpha)	20	55	2.4	0.0437	Low Abundant Cargo			144.74		C	2796
SMAD1_HUMAN	Mothers against decapentaplegic homolog 1 (MAD homolog 1) (Mothers against DPP homolog 1) (JV4-1) (Mad-related protein 1) (SMAD family member 1) (SMAD 1) (Smad1) (hSMAD1) (Transforming growth factor-beta-signaling protein 1) (BSP-1)	20	55	2.4	0.0437	Low Abundant Cargo	Both	NESdbH	52.259		C	2260
PAXI1_HUMAN	PAX-interacting protein 1 (PAX transactivation activation domain-interacting protein)	19	54	2.4	0.0437	Low Abundant Cargo	Nucleus		117.69		C	2668
MROH6_HUMAN	Maestro heat-like repeat-containing protein family member 6	19	53	2.3	0.0437	Low Abundant Cargo			77.185		C	23
REN3A_HUMAN	Regulator of nonsense transcripts 3A (Nonsense mRNA reducing factor 3A) (Up-frameshift suppressor 3 homolog A) (hUpf3)	19	53	2.3	0.0437	Low Abundant Cargo	Both		51.007		C	3890
CNTRB_HUMAN	Centrobin (Centrosomal BRCA2-interacting protein) (LYST-interacting protein 8)	18	51	2.2	0.0437	Low Abundant Cargo	Cytoplasm		97.112		C	2953
GEMI2_HUMAN	Gem-associated protein 2 (Gemin-2) (Component of gems 2) (Survival of motor neuron protein-interacting protein 1) (SMN-interacting protein 1)	18	51	2.2	0.0437	Low Abundant Cargo	Both		28.155		C	213
KCD20_HUMAN	BTB/POZ domain-containing protein KCTD20 (Potassium channel tetramerization domain containing 20)	18	51	2.2	0.0437	Low Abundant Cargo	Cytoplasm		47.48		C	2751
LAP2_HUMAN	Protein LAP2 (Densin-180-like protein) (Erbb2-interacting protein) (Erbin)	18	51	2.2	0.0437	Low Abundant Cargo	Both		146.08		C	3560
TBC14_HUMAN	TBC1 domain family member 14	18	51	2.2	0.0437	Low Abundant Cargo	Cytoplasm		78.136		C	4354
STAM2_HUMAN	Signal transducing adapter molecule 2 (STAM-2) (Hrs-binding protein)	18	49	2.2	0.0437	Low Abundant Cargo	Cytoplasm		58.164		C	514
NR4A1_HUMAN	Nuclear receptor subfamily 4 group A member 1 (Early response protein NAK1) (Nuclear hormone receptor NUR/77) (Nur77) (Orphan nuclear receptor HMR) (Orphan nuclear receptor TR3) (ST-59) (Testicular receptor 3)	18	49	2.1	0.0437	Low Abundant Cargo	Both		64.463		C	1004
YETS4_HUMAN	YEATS domain-containing protein 4 (Glioma-amplified sequence 41) (Gas41) (NuMA-binding protein 1) (NuBI-1) (NuBI1)	18	49	2.1	0.0437	Low Abundant Cargo	Nucleus		26.499		C	624
LRC57_HUMAN	Leucine-rich repeat-containing protein 57	17	48	2.1	0.0437	Low Abundant Cargo			26.754		C	3015
MCM8_HUMAN	DNA helicase MCM8 (EC 3.6.4.12) (Minichromosome maintenance 8)	17	48	2.1	0.0437	Low Abundant Cargo	Nucleus		91.782		C	4455
CPSF4_HUMAN	Cleavage and polyadenylation specificity factor subunit 4 (Cleavage and polyadenylation specificity factor 30 kDa subunit) (CPSF 30 kDa subunit) (NS1 effector domain-binding protein 1) (Neb-1) (No arches homolog)	17	47	2.1	0.0437	Low Abundant Cargo	Nucleus		27.419		C	627
ASH2L_HUMAN	Set1/Ash2 histone methyltransferase complex subunit ASH2 (ASH2-like protein)	17	47	2	0.0437	Low Abundant Cargo	Nucleus		56.476		C	4375
RHG21_HUMAN	Rho GTPase-activating protein 21 (Rho GTPase-activating protein 10) (Rho-type GTPase-activating protein 21)	16	46	2	0.0437	Low Abundant Cargo	Cytoplasm		217.33		C	2450
SUH_HUMAN	Recombining binding protein suppressor of hairless (CBF-1) (J kappa-recombination signal-binding protein) (RBP-J kappa) (RBP-J) (RBP-JK) (Renal carcinoma antigen NY-REN-30)	17	46	2	0.0437	Low Abundant Cargo	Both		45.641		C	1863
UT14A_HUMAN	U3 small nucleolar RNA-associated protein 14 homolog A (Antigen NY-CO-16) (Serologically defined colon cancer antigen 16)	16	46	2	0.0437	Low Abundant Cargo	Nucleus		69.263		C	3747
EAF2_HUMAN	ELL-associated factor 2 (Testosterone-regulated apoptosis inducer and tumor suppressor protein)	16	45	1.9	0.0437	Low Abundant Cargo	Nucleus		28.791		C	3368
PLRG1_HUMAN	Pleiotropic regulator 1	16	44	1.9	0.0437	Low Abundant Cargo	Nucleus		56.289		C	332
TOLIP_HUMAN	Toll-interacting protein	15	43	1.9	0.0437	Low Abundant Cargo	Cytoplasm		30.281		C	3864
COIL_HUMAN	Coilin (p80-coilin)	15	42	1.8	0.0437	Low Abundant Cargo	Nucleus		62.608		C	1232
MAML1_HUMAN	Mastermind-like protein 1 (Mam-1)	15	42	1.8	0.0437	Low Abundant Cargo	Nucleus		108.05		C	3232
SHAN2_HUMAN	SH3 and multiple ankyrin repeat domains protein 2 (Shank2) (Cortactin-binding protein 1) (CortBP1) (Proline-rich synapse-associated protein 1)	15	42	1.8	0.0437	Low Abundant Cargo	Cytoplasm		201.26		C	4584
CS044_HUMAN	Uncharacterized protein C19orf44	15	41	1.8	0.0437	Low Abundant Cargo			66.322		C	3967
IL33_HUMAN	Interleukin-33 (IL-33) (Interleukin-1 family member 11) (IL-1F11) (Nuclear factor from high endothelial venules) (NF-HEV) [Cleaved into: Interleukin-33 (95-270); Interleukin-33 (99-270); Interleukin-33 (109-270)]	15	41	1.8	0.0437	Low Abundant Cargo	Both		16.25		C	640
NCK5L_HUMAN	Nck-associated protein 5-like (NCKAP5-like)	15	41	1.8	0.0437	Low Abundant Cargo			136.72		C	4060
NDE1_HUMAN	Nuclear distribution protein nudE homolog 1 (NudE)	14	40	1.7	0.0437	Low Abundant Cargo	Cytoplasm		37.72		C	4257
ANKZ1_HUMAN	Ankyrin repeat and zinc finger domain-containing protein 1 (Zinc finger protein 744)	14	39	1.7	0.0437	Low Abundant Cargo		Thakar&Karaca	80.926		C	3996
DBF4A_HUMAN	Protein DBF4 homolog A (Activator of S phase kinase) (Chiffon homolog A) (DBF4-type zinc finger-containing protein 1)	14	39	1.7	0.0437	Low Abundant Cargo	Nucleus		76.857		C	4388
BACD2_HUMAN	BTB/POZ domain-containing adapter for CUL3-mediated RhoA degradation protein 2 (hBACURD2) (BTB/POZ domain-containing protein TNFAIP1) (Protein B12) (Tumor necrosis factor, alpha-induced protein 1, endothelial)	13	37	1.6	0.0437	Low Abundant Cargo	Both		36.204		C	2054
CL043_HUMAN	Uncharacterized protein C12orf43	13	36	1.6	0.0437	Low Abundant Cargo			28.17		C	3361
ITBP1_HUMAN	Integrin beta-1-binding protein 1 (Integrin cytoplasmic domain-associated protein 1) (ICAP-1)	13	36	1.6	0.0437	Low Abundant Cargo	Both		21.782		C	190
PRDBP_HUMAN	Protein kinase C delta-binding protein (Cavin-3) (Serum deprivation response factor-related gene product that binds to C-kinase) (hSRBC)	13	35	1.5	0.0437	Low Abundant Cargo	Cytoplasm		27.701		C	3301
SNPC3_HUMAN	snRNA-activating protein complex subunit 3 (SNAPc subunit 3) (Proximal sequence element-binding transcription factor subunit beta) (PSE-binding factor subunit beta) (PTF subunit beta) (Small nuclear RNA-activating complex polypeptide 3) (snRNA-activating protein complex 50 kDa subunit) (SNAPc 50 kDa subunit)	12	35	1.5	0.0437	Low Abundant Cargo	Nucleus		46.752		C	3279
WRP73_HUMAN	WD repeat-containing protein WRAP73 (WD repeat-containing protein 8) (WD repeat-containing protein antisense to TP73 gene)	13	35	1.5	0.0437	Low Abundant Cargo	Cytoplasm		51.588		C	4357
DDX56_HUMAN	Probable ATP-dependent RNA helicase DDX56 (EC 3.6.4.13) (ATP-dependent 61 kDa nucleolar RNA helicase) (DEAD box protein 21) (DEAD box protein 56)	12	34	1.5	0.0437	Low Abundant Cargo	Nucleus		57.274		C	4267
F10C1_HUMAN	Protein FRA10AC1	12	34	1.5	0.0437	Low Abundant Cargo	Nucleus		32.896		C	2677
SUGP1_HUMAN	SURP and G-patch domain-containing protein 1 (RNA-binding protein RBP) (Splicing factor 4)	12	34	1.5	0.0437	Low Abundant Cargo	Nucleus		72.47		C	2902
TNR6C_HUMAN	Trinucleotide repeat-containing gene 6C protein	12	34	1.5	0.0437	Low Abundant Cargo			175.96		C	4061
ZC12C_HUMAN	Probable ribonuclease ZC3H12C (EC 3.1.-.-) (MCP-induced protein 3) (Zinc finger CCCH domain-containing protein 12C)	12	34	1.5	0.0437	Low Abundant Cargo			99.339		C	3833
AXIN1_HUMAN	Axin-1 (Axis inhibition protein 1) (hAxin)	12	33	1.4	0.0437	Low Abundant Cargo	Both		91.652		C	253
BMP2K_HUMAN	BMP-2-inducible protein kinase (BIKe) (EC 2.7.11.1)	11	32	1.4	0.0437	Low Abundant Cargo	Nucleus		73.837		C	4163
PITM2_HUMAN	Membrane-associated phosphatidylinositol transfer protein 2 (Phosphatidylinositol transfer protein, membrane-associated 2) (PITPnm 2) (Pyk2 N-terminal domain-interacting receptor 3) (NIR-3)	11	32	1.4	0.0437	Low Abundant Cargo	Cytoplasm		116.58		C	3804
POGZ_HUMAN	Pogo transposable element with ZNF domain (Suppressor of hairy wing homolog 5) (Zinc finger protein 280E) (Zinc finger protein 635)	11	32	1.4	0.0437	Low Abundant Cargo	Both		37.881		C	2727
RRF2M_HUMAN	Ribosome-releasing factor 2, mitochondrial (RRF2mt) (Elongation factor G 2, mitochondrial) (EF-G2mt) (mEF-G 2) (Elongation factor G2) (hEFG2)	11	32	1.4	0.0437	Low Abundant Cargo	Cytoplasm		81.199	MT	C	3313
TDIF1_HUMAN	Deoxynucleotidyltransferase terminal-interacting protein 1 (Terminal deoxynucleotidyltransferase-interacting factor 1) (TdIF1) (TdT-interacting factor 1)	11	32	1.4	0.0437	Low Abundant Cargo	Nucleus		37.013		C	3883
UTP6_HUMAN	U3 small nucleolar RNA-associated protein 6 homolog (Hepatocellular carcinoma-associated antigen 66) (Multiple hat domains protein)	11	32	1.4	0.0437	Low Abundant Cargo	Nucleus		70.193		C	4274
N4BP3_HUMAN	NEDD4-binding protein 3 (N4BP3)	11	30	1.3	0.0437	Low Abundant Cargo	Cytoplasm		60.469		C	237
Z3H7A_HUMAN	Zinc finger CCCH domain-containing protein 7A	11	30	1.3	0.0437	Low Abundant Cargo	Nucleus		110.54		C	2890
MON1A_HUMAN	Vacuolar fusion protein MON1 homolog A	10	29	1.3	0.0437	Low Abundant Cargo			62.131		C	2818
RL18A_HUMAN	60S ribosomal protein L18a	10	29	1.3	0.0437	Low Abundant Cargo		Thakar&Karaca	20.762		C	1820
VPS52_HUMAN	Vacuolar protein sorting-associated protein 52 homolog (SAC2 suppressor of actin mutations 2-like protein)	10	29	1.2	0.0437	Low Abundant Cargo	Cytoplasm		82.22		C	2956
ENKD1_HUMAN	Enkurin domain-containing protein 1	10	28	1.2	0.0437	Low Abundant Cargo			38.759		C	3868
HDAC5_HUMAN	Histone deacetylase 5 (HD5) (EC 3.5.1.98) (Antigen NY-CO-9)	10	28	1.2	0.0437	Low Abundant Cargo	Both	NESdbH, BioGrid	112.19		C	4592
AF9_HUMAN	Protein AF-9 (ALL1-fused gene from chromosome 9 protein) (Myeloid/lymphoid or mixed-lineage leukemia translocated to chromosome 3 protein) (YEATS domain-containing protein 3)	9.8	27	1.2	0.0437	Low Abundant Cargo	Nucleus		63.351		C	1289
MPP9_HUMAN	M-phase phosphoprotein 9	9.8	27	1.2	0.0437	Low Abundant Cargo	Cytoplasm		115.72		C	3597
PSRC1_HUMAN	Proline/serine-rich coiled-coil protein 1	9.7	27	1.2	0.0437	Low Abundant Cargo	Cytoplasm		35.632		C	2599
PDE4B_HUMAN	cAMP-specific 3',5'-cyclic phosphodiesterase 4B (EC 3.1.4.53) (DPDE4) (PDE32)	9.3	26	1.1	0.0437	Low Abundant Cargo			57.708		C	1874
RNC_HUMAN	Ribonuclease 3 (EC 3.1.26.3) (Protein Drosha) (Ribonuclease III) (RNase III) (p241)	9.2	26	1.1	0.0437	Low Abundant Cargo	Nucleus		138.16		C	4140
VAPA_HUMAN	Vesicle-associated membrane protein-associated protein A (VAMP-A) (VAMP-associated protein A) (VAP-A) (33 kDa VAMP-associated protein) (VAP-33)	9.1	26	1.1	0.0437	Low Abundant Cargo	Cytoplasm		27.893	TM	C	4317
KLH20_HUMAN	Kelch-like protein 20 (Kelch-like ECT2-interacting protein) (Kelch-like protein X)	9.1	25	1.1	0.0437	Low Abundant Cargo	Both		67.954		C	4633
LAR4B_HUMAN	La-related protein 4B (La ribonucleoprotein domain family member 4B) (La ribonucleoprotein domain family member 5) (La-related protein 5)	8.8	25	1.1	0.0437	Low Abundant Cargo	Cytoplasm		80.551		C	3240
RFIP5_HUMAN	Rab11 family-interacting protein 5 (Rab11-FIP5) (Gamma-SNAP-associated factor 1) (Gaf-1) (Phosphoprotein pp75) (Rab11-interacting protein Rip11)	8.9	25	1.1	0.0437	Low Abundant Cargo	Cytoplasm		70.414		C	3775
ZBTB1_HUMAN	Zinc finger and BTB domain-containing protein 1	8.9	25	1.1	0.0437	Low Abundant Cargo	Nucleus		73.682		C	4625
CHP1_HUMAN	Calcineurin B homologous protein 1 (Calcineurin B-like protein) (Calcium-binding protein CHP) (Calcium-binding protein p22) (EF-hand calcium-binding domain-containing protein p22)	8.7	24	1.1	0.0437	Low Abundant Cargo	Both	NESdbH	22.456		C	3613
PKHA5_HUMAN	Pleckstrin homology domain-containing family A member 5 (PH domain-containing family A member 5) (Phosphoinositol 3-phosphate-binding protein 2) (PEPP-2)	8.6	24	1	0.0437	Low Abundant Cargo	Cytoplasm		121.27		C	4029
MYO9A_HUMAN	Unconventional myosin-IXa (Unconventional myosin-9a)	58	200	7.1	0.0361	Ambiguous	Cytoplasm		290.38	TM	D	43
TNR6B_HUMAN	Trinucleotide repeat-containing gene 6B protein	78	150	9.6	0.0643	Ambiguous	Cytoplasm		182.81		D	4571
ZCHC2_HUMAN	Zinc finger CCHC domain-containing protein 2	120	95	15	0.158	Ambiguous			125.93		D	3827
NFAC3_HUMAN	Nuclear factor of activated T-cells, cytoplasmic 3 (NF-ATc3) (NFATc3) (NFATx) (T-cell transcription factor NFAT4) (NF-AT4)	240	93	29	0.31	Ambiguous	Both		115.59		D	1942
NAA35_HUMAN	N-alpha-acetyltransferase 35, NatC auxiliary subunit (Embryonic growth-associated protein homolog) (Protein MAK10 homolog)	160	87	19	0.22	Ambiguous	Cytoplasm		83.638		D	2503
NBR1_HUMAN	Next to BRCA1 gene 1 protein (Cell migration-inducing gene 19 protein) (Membrane component chromosome 17 surface marker 2) (Neighbor of BRCA1 gene 1 protein) (Protein 1A1-3B)	120	85	15	0.173	Ambiguous	Cytoplasm		103.83		D	2116
NOL11_HUMAN	Nucleolar protein 11	210	84	25	0.3	Ambiguous	Nucleus		81.123		D	3989
DDX41_HUMAN	Probable ATP-dependent RNA helicase DDX41 (EC 3.6.4.13) (DEAD box protein 41) (DEAD box protein abstrakt homolog)	150	84	18	0.218	Ambiguous	Nucleus		69.837		D	4463
SYNEM_HUMAN	Synemin (Desmuslin)	110	82	14	0.17	Ambiguous	Cytoplasm		172.77		D	240
IQGA3_HUMAN	Ras GTPase-activating-like protein IQGAP3	83	79	10	0.128	Ambiguous			184.7		D	2807
SIK3_HUMAN	Serine/threonine-protein kinase SIK3 (EC 2.7.11.1) (Salt-inducible kinase 3) (SIK-3) (Serine/threonine-protein kinase QSK)	270	78	44	0.559	Ambiguous	Cytoplasm		139.98		D	4626
PRPF3_HUMAN	U4/U6 small nuclear ribonucleoprotein Prp3 (Pre-mRNA-splicing factor 3) (hPrp3) (U4/U6 snRNP 90 kDa protein)	240	77	29	0.379	Ambiguous	Nucleus		77.528		D	307
UNK_HUMAN	RING finger protein unkempt homolog (Zinc finger CCCH domain-containing protein 5)	160	74	19	0.265	Ambiguous			88.084		D	3824
METL6_HUMAN	Methyltransferase-like protein 6 (EC 2.1.1.-)	310	68	37	0.549	Ambiguous			33.251		D	3110
R3HD2_HUMAN	R3H domain-containing protein 2	230	66	28	0.419	Ambiguous	Nucleus		107		D	4628
C170B_HUMAN	Centrosomal protein of 170 kDa protein B (Centrosomal protein 170B) (Cep170B)	350	64	43	0.676	Ambiguous	Cytoplasm		171.69		D	4709
SCAI_HUMAN	Protein SCAI (Suppressor of cancer cell invasion protein)	170	64	21	0.327	Ambiguous	Both		70.399	TM	D	3017
MTAP2_HUMAN	Microtubule-associated protein 2 (MAP-2)	270	63	33	0.528	Ambiguous	Cytoplasm		199.08		D	838
TFP11_HUMAN	Tuftelin-interacting protein 11 (Septin and tuftelin-interacting protein 1) (STIP-1)	290	62	35	0.569	Ambiguous	Both		96.819		D	4364
CEP76_HUMAN	Centrosomal protein of 76 kDa (Cep76)	180	61	22	0.359	Ambiguous	Cytoplasm		65.732		D	3091
PHLB2_HUMAN	Pleckstrin homology-like domain family B member 2 (Protein LL5-beta)	110	59	30	0.504	Ambiguous	Cytoplasm		142.16		D	2774
CNO6L_HUMAN	CCR4-NOT transcription complex subunit 6-like (EC 3.1.13.4) (Carbon catabolite repressor protein 4 homolog B)	360	57	43	0.758	Ambiguous	Both		63.001		D	3508
CCNT1_HUMAN	Cyclin-T1 (CycT1) (Cyclin-T)	83	57	10	0.176	Ambiguous	Nucleus	Thakar&Karaca	80.684		D	397
SMG8_HUMAN	Protein SMG8 (Amplified in breast cancer gene 2 protein) (Protein smg-8 homolog)	57	57	6.9	0.121	Ambiguous			109.68		D	3045
PLK1_HUMAN	Serine/threonine-protein kinase PLK1 (EC 2.7.11.21) (Polo-like kinase 1) (PLK-1) (Serine/threonine-protein kinase 13) (STPK13)	290	56	35	0.625	Ambiguous	Both		68.254		D	1505
PARD3_HUMAN	Partitioning defective 3 homolog (PAR-3) (PARD-3) (Atypical PKC isotype-specific-interacting protein) (ASIP) (CTCL tumor antigen se2-5) (PAR3-alpha)	210	53	26	0.477	Ambiguous	Cytoplasm		138.33		D	3145
MLX_HUMAN	Max-like protein X (Class D basic helix-loop-helix protein 13) (bHLHd13) (Max-like bHLHZip protein) (Protein BigMax) (Transcription factor-like protein 4)	300	52	37	0.71	Ambiguous	Both		27.883		D	4413
CP072_HUMAN	UPF0472 protein C16orf72	120	51	14	0.279	Ambiguous			30.925		D	2160
SR140_HUMAN	U2 snRNP-associated SURP motif-containing protein (140 kDa Ser/Arg-rich domain protein) (U2-associated protein SR140)	84	51	10	0.202	Ambiguous	Nucleus		118.23		D	236
HOIL1_HUMAN	RanBP-type and C3HC4-type zinc finger-containing protein 1 (EC 6.3.2.-) (HBV-associated factor 4) (Heme-oxidized IRP2 ubiquitin ligase 1) (HOIL-1) (Hepatitis B virus X-associated protein 4) (RING finger protein 54) (Ubiquitin-conjugating enzyme 7-interacting protein 3)	260	50	32	0.64	Ambiguous		NESdbH	57.571		D	3794
CP070_HUMAN	UPF0183 protein C16orf70	330	49	40	0.831	Ambiguous			47.524		D	3696
ARG28_HUMAN	Rho guanine nucleotide exchange factor 28 (190 kDa guanine nucleotide exchange factor) (p190-RhoGEF) (p190RhoGEF) (Rho guanine nucleotide exchange factor)	110	49	14	0.283	Ambiguous	Cytoplasm		185.84		D	2962
PTRF_HUMAN	Polymerase I and transcript release factor (Cavin-1)	280	48	35	0.73	Ambiguous	Both		43.476		D	2566
UBP16_HUMAN	Ubiquitin carboxyl-terminal hydrolase 16 (EC 3.4.19.12) (Deubiquitinating enzyme 16) (Ubiquitin thioesterase 16) (Ubiquitin-processing protease UBP-M) (Ubiquitin-specific-processing protease 16)	96	48	12	0.244	Ambiguous	Nucleus	BioGrid	91.869		D	4760
TRI32_HUMAN	E3 ubiquitin-protein ligase TRIM32 (EC 6.3.2.-) (72 kDa Tat-interacting protein) (Tripartite motif-containing protein 32) (Zinc finger protein HT2A)	73	48	9	0.188	Ambiguous	Both		71.988		D	1955
CP131_HUMAN	Centrosomal protein of 131 kDa (5-azacytidine-induced protein 1) (Pre-acrosome localization protein 1)	53	48	6.4	0.134	Ambiguous	Cytoplasm		117.4		D	4563
NSL1_HUMAN	Kinetochore-associated protein NSL1 homolog	270	46	33	0.71	Ambiguous	Nucleus		32.162		D	3476
DJC21_HUMAN	DnaJ homolog subfamily C member 21 (DnaJ homolog subfamily A member 5) (Protein GS3)	130	46	16	0.355	Ambiguous			62.027		D	2405
TRI18_HUMAN	E3 ubiquitin-protein ligase Midline-1 (EC 6.3.2.-) (Midin) (Putative transcription factor XPRF) (RING finger protein 59) (RING finger protein Midline-1) (Tripartite motif-containing protein 18)	280	45	34	0.757	Ambiguous	Cytoplasm		75.25		D	266
DDX42_HUMAN	ATP-dependent RNA helicase DDX42 (EC 3.6.4.13) (DEAD box protein 42) (RNA helicase-like protein) (RHELP) (RNA helicase-related protein) (RNAHP) (SF3b DEAD box protein) (Splicing factor 3B-associated 125 kDa protein) (SF3b125)	130	45	16	0.353	Ambiguous	Both		102.97		D	2844
RPB4_HUMAN	DNA-directed RNA polymerase II subunit RPB4 (RNA polymerase II subunit B4) (DNA-directed RNA polymerase II subunit D) (RNA polymerase II 16 kDa subunit) (RPB16)	110	45	13	0.294	Ambiguous	Nucleus		16.311		D	278
SSFA2_HUMAN	Sperm-specific antigen 2 (Cleavage signal-1 protein) (CS-1) (Ki-ras-induced actin-interacting protein)	330	44	40	0.901	Ambiguous	Cytoplasm		138.38		D	1081
RL13A_HUMAN	60S ribosomal protein L13a (23 kDa highly basic protein)	260	44	32	0.727	Ambiguous	Cytoplasm	Thakar&Karaca	23.577		D	1247
PHF23_HUMAN	PHD finger protein 23 (PDH-containing protein JUNE-1)	300	41	37	0.903	Ambiguous			43.818		D	3725
ATX1L_HUMAN	Ataxin-1-like (Brother of ataxin-1) (Brother of ATXN1)	210	41	25	0.612	Ambiguous	Both		73.305		D	813
KIF1C_HUMAN	Kinesin-like protein KIF1C	170	41	21	0.519	Ambiguous	Cytoplasm		122.95		D	358
CHERP_HUMAN	Calcium homeostasis endoplasmic reticulum protein (ERPROT 213-21) (SR-related CTD-associated factor 6)	320	40	39	0.976	Ambiguous	Cytoplasm		103.7		D	2897
LPIN2_HUMAN	Phosphatidate phosphatase LPIN2 (EC 3.1.3.4) (Lipin-2)	150	40	19	0.465	Ambiguous	Both		99.398		D	3224
NAA30_HUMAN	N-alpha-acetyltransferase 30 (EC 2.3.1.88) (N-acetyltransferase 12) (N-acetyltransferase MAK3 homolog) (NatC catalytic subunit)	200	39	25	0.638	Ambiguous	Cytoplasm		39.319		D	2144
MINK1_HUMAN	Misshapen-like kinase 1 (EC 2.7.11.1) (GCK family kinase MiNK) (MAPK/ERK kinase kinase kinase 6) (MEK kinase kinase 6) (MEKKK 6) (Misshapen/NIK-related kinase) (Mitogen-activated protein kinase kinase kinase kinase 6)	150	39	18	0.472	Ambiguous	Cytoplasm		147.65		D	2980
POTE1_HUMAN	Protection of telomeres protein 1 (hPot1) (POT1-like telomere end-binding protein)	73	38	8.9	0.236	Ambiguous	Nucleus		60.533		D	4187
RBM7_HUMAN	RNA-binding protein 7 (RNA-binding motif protein 7)	240	37	30	0.801	Ambiguous			30.503		D	4735
EIF2D_HUMAN	Eukaryotic translation initiation factor 2D (eIF2d) (Hepatocellular carcinoma-associated antigen 56) (Ligatin)	120	37	15	0.396	Ambiguous	Cytoplasm		64.706		D	1263
WBP11_HUMAN	WW domain-binding protein 11 (WBP-11) (Npw38-binding protein) (NpwBP) (SH3 domain-binding protein SNP70) (Splicing factor that interacts with PQBP-1 and PP1)	100	35	13	0.366	Ambiguous	Both		69.997		D	4643
MATK_HUMAN	Megakaryocyte-associated tyrosine-protein kinase (EC 2.7.10.2) (CSK homologous kinase) (CHK) (Hematopoietic consensus tyrosine-lacking kinase) (Protein kinase HYL) (Tyrosine-protein kinase CTK)	76	35	9.3	0.265	Ambiguous	Cytoplasm		56.468		D	1293
FBW1B_HUMAN	F-box/WD repeat-containing protein 11 (F-box and WD repeats protein beta-TrCP2) (F-box/WD repeat-containing protein 1B) (Homologous to Slimb protein) (HOS)	110	34	14	0.411	Ambiguous	Both		58.422		D	4484
DTL_HUMAN	Denticleless protein homolog (DDB1- and CUL4-associated factor 2) (Lethal(2) denticleless protein homolog) (Retinoic acid-regulated nuclear matrix-associated protein)	340	33	42	1.27	Ambiguous	Both		79.467		D	4298
CNOT8_HUMAN	CCR4-NOT transcription complex subunit 8 (EC 3.1.13.4) (CAF1-like protein) (CALIFp) (CAF2) (CCR4-associated factor 8) (Caf1b)	130	33	16	0.488	Ambiguous	Both		33.54		D	4402
BORG4_HUMAN	Cdc42 effector protein 4 (Binder of Rho GTPases 4)	390	32	48	1.52	Ambiguous	Cytoplasm		37.979		D	3920
PEX6_HUMAN	Peroxisome assembly factor 2 (PAF-2) (Peroxin-6) (Peroxisomal biogenesis factor 6) (Peroxisomal-type ATPase 1)	91	32	11	0.348	Ambiguous	Cytoplasm		104.06		D	2033
NEBU_HUMAN	Nebulin	400	31	49	1.6	Ambiguous	Cytoplasm		986.67		D	977
F120A_HUMAN	Constitutive coactivator of PPAR-gamma-like protein 1 (Oxidative stress-associated Src activator) (Protein FAM120A)	92	31	11	0.367	Ambiguous	Cytoplasm		121.89		D	4294
UBAP2_HUMAN	Ubiquitin-associated protein 2 (UBAP-2)	290	30	35	1.15	Ambiguous		Thakar&Karaca	117.11		D	2453
APC_HUMAN	Adenomatous polyposis coli protein (Protein APC) (Deleted in polyposis 2.5)	110	30	14	0.469	Ambiguous	Cytoplasm	NESdbH, BioGrid	311.64		D	1030
GNL3_HUMAN	Guanine nucleotide-binding protein-like 3 (E2-induced gene 3 protein) (Novel nucleolar protein 47) (NNP47) (Nucleolar GTP-binding protein 3) (Nucleostemin)	100	30	12	0.41	Ambiguous	Nucleus	Thakar&Karaca	60.54		D	3753
CEP83_HUMAN	Centrosomal protein of 83 kDa (Cep83) (Coiled-coil domain-containing protein 41) (Renal carcinoma antigen NY-REN-58)	75	30	9.2	0.303	Ambiguous	Cytoplasm		82.058		D	4737
PHF14_HUMAN	PHD finger protein 14	180	29	22	0.75	Ambiguous			100.05		D	547
CAR14_HUMAN	Caspase recruitment domain-containing protein 14 (CARD-containing MAGUK protein 2) (Carma 2)	80	29	9.8	0.343	Ambiguous	Cytoplasm		113.27		D	3777
ERCC6_HUMAN	DNA excision repair protein ERCC-6 (EC 3.6.4.-) (ATP-dependent helicase ERCC6) (Cockayne syndrome protein CSB)	71	29	8.7	0.306	Ambiguous	Nucleus		168.41		D	1833
SNX29_HUMAN	Sorting nexin-29 (RUN domain-containing protein 2A)	54	29	6.6	0.225	Ambiguous			89.143		D	3140
ELOA1_HUMAN	Transcription elongation factor B polypeptide 3 (Elongin 110 kDa subunit) (Elongin-A) (EloA) (RNA polymerase II transcription factor SIII subunit A1) (SIII p110)	350	28	43	1.55	Ambiguous	Nucleus		89.908		D	2097
E2F5_HUMAN	Transcription factor E2F5 (E2F-5)	170	28	20	0.731	Ambiguous	Nucleus		37.539		D	2208
TRAF7_HUMAN	E3 ubiquitin-protein ligase TRAF7 (EC 6.3.2.-) (RING finger and WD repeat-containing protein 1) (RING finger protein 119) (TNF receptor-associated factor 7)	77	28	9.4	0.329	Ambiguous	Cytoplasm		74.608		D	2615
WDR48_HUMAN	WD repeat-containing protein 48 (USP1-associated factor 1) (WD repeat endosomal protein) (p80)	290	27	35	1.27	Ambiguous	Both		76.21		D	3088
ANC2_HUMAN	Anaphase-promoting complex subunit 2 (APC2) (Cyclosome subunit 2)	220	27	27	1.03	Ambiguous		Thakar&Karaca	93.468		D	4469
LAMB1_HUMAN	Laminin subunit beta-1 (Laminin B1 chain) (Laminin-1 subunit beta) (Laminin-10 subunit beta) (Laminin-12 subunit beta) (Laminin-2 subunit beta) (Laminin-6 subunit beta) (Laminin-8 subunit beta)	150	27	18	0.683	Ambiguous	Cytoplasm		198.04	ER	D	770
PCSK9_HUMAN	Proprotein convertase subtilisin/kexin type 9 (EC 3.4.21.-) (Neural apoptosis-regulated convertase 1) (NARC-1) (Proprotein convertase 9) (PC9) (Subtilisin/kexin-like protease PC9)	130	27	16	0.607	Ambiguous	Cytoplasm		74.285	ER	D	3034
MK06_HUMAN	Mitogen-activated protein kinase 6 (MAP kinase 6) (MAPK 6) (EC 2.7.11.24) (Extracellular signal-regulated kinase 3) (ERK-3) (MAP kinase isoform p97) (p97-MAPK)	54	27	6.6	0.243	Ambiguous	Both		82.68		D	2297
CDC16_HUMAN	Cell division cycle protein 16 homolog (Anaphase-promoting complex subunit 6) (APC6) (CDC16 homolog) (CDC16Hs) (Cyclosome subunit 6)	290	26	36	1.35	Ambiguous	Cytoplasm		65.859		D	1951
CNO10_HUMAN	CCR4-NOT transcription complex subunit 10	95	26	12	0.443	Ambiguous	Both		82.309		D	4007
GCC2_HUMAN	GRIP and coiled-coil domain-containing protein 2 (185 kDa Golgi coiled-coil protein) (GCC185) (CLL-associated antigen KW-11) (CTCL tumor antigen se1-1) (Ran-binding protein 2-like 4) (RanBP2L4) (Renal carcinoma antigen NY-REN-53)	270	25	33	1.32	Ambiguous	Cytoplasm		195.91		D	2888
TB10B_HUMAN	TBC1 domain family member 10B (Rab27A-GAP-beta)	210	25	26	1.04	Ambiguous	Cytoplasm		87.198		D	2363
DMXL1_HUMAN	DmX-like protein 1 (X-like 1 protein)	66	25	8	0.32	Ambiguous			337.83		D	4696
NDUA8_HUMAN	NADH dehydrogenase [ubiquinone] 1 alpha subcomplex subunit 8 (Complex I-19kD) (CI-19kD) (Complex I-PGIV) (CI-PGIV) (NADH-ubiquinone oxidoreductase 19 kDa subunit)	290	24	35	1.44	Ambiguous	Cytoplasm		20.105		D	1476
MTMR4_HUMAN	Myotubularin-related protein 4 (EC 3.1.3.48) (FYVE domain-containing dual specificity protein phosphatase 2) (FYVE-DSP2) (Zinc finger FYVE domain-containing protein 11)	120	24	15	0.609	Ambiguous	Cytoplasm		133.35		D	4269
ZC3H4_HUMAN	Zinc finger CCCH domain-containing protein 4	110	24	13	0.549	Ambiguous			140.26		D	4576
LG3BP_HUMAN	Galectin-3-binding protein (Basement membrane autoantigen p105) (Lectin galactoside-binding soluble 3-binding protein) (Mac-2-binding protein) (MAC2BP) (Mac-2 BP) (Tumor-associated antigen 90K)	62	24	7.5	0.31	Ambiguous	Other		65.33	ER	D	1891
CE192_HUMAN	Centrosomal protein of 192 kDa (Cep192)	390	22	48	2.13	Ambiguous	Cytoplasm		213.14		D	3139
SNX9_HUMAN	Sorting nexin-9 (SH3 and PX domain-containing protein 1) (Protein SDP1) (SH3 and PX domain-containing protein 3A)	330	22	41	1.84	Ambiguous	Cytoplasm		66.591		D	4763
CJ076_HUMAN	UPF0668 protein C10orf76	130	22	16	0.716	Ambiguous	Cytoplasm		31.142	TM	D	2444
KLD10_HUMAN	Kelch domain-containing protein 10	110	22	14	0.63	Ambiguous	Both		49.097		D	2606
WASH6_HUMAN	WAS protein family homolog 6 (Protein FAM39A)	220	21	27	1.25	Ambiguous	Cytoplasm		47.989		D	4095
SENP7_HUMAN	Sentrin-specific protease 7 (EC 3.4.22.68) (SUMO-1-specific protease 2) (Sentrin/SUMO-specific protease SENP7)	130	21	16	0.756	Ambiguous			115.87		D	3654
CNOT6_HUMAN	CCR4-NOT transcription complex subunit 6 (EC 3.1.13.4) (CCR4 carbon catabolite repression 4-like) (Carbon catabolite repressor protein 4 homolog) (Cytoplasmic deadenylase)	63	21	7.7	0.366	Ambiguous	Both		63.306		D	4522
MTMR6_HUMAN	Myotubularin-related protein 6 (EC 3.1.3.-)	370	20	45	2.32	Ambiguous	Nucleus		71.967		D	4595
TIF1A_HUMAN	Transcription intermediary factor 1-alpha (TIF1-alpha) (EC 6.3.2.-) (E3 ubiquitin-protein ligase TRIM24) (RING finger protein 82) (Tripartite motif-containing protein 24)	75	20	9.2	0.45	Ambiguous	Both		113.02		D	252
RGPD3_HUMAN	RanBP2-like and GRIP domain-containing protein 3	58	20	5.1	0.255	Ambiguous			197.48		D	29
P3C2A_HUMAN	Phosphatidylinositol 4-phosphate 3-kinase C2 domain-containing subunit alpha (PI3K-C2-alpha) (PtdIns-3-kinase C2 subunit alpha) (EC 2.7.1.154) (Phosphoinositide 3-kinase-C2-alpha)	300	19	37	1.91	Ambiguous	Both		190.68		D	151
TAB3_HUMAN	TGF-beta-activated kinase 1 and MAP3K7-binding protein 3 (Mitogen-activated protein kinase kinase kinase 7-interacting protein 3) (NF-kappa-B-activating protein 1) (TAK1-binding protein 3) (TAB-3) (TGF-beta-activated kinase 1-binding protein 3)	210	19	26	1.37	Ambiguous			75.599		D	2987
QSER1_HUMAN	Glutamine and serine-rich protein 1	86	19	10	0.544	Ambiguous			189.97		D	2315
APC1_HUMAN	Anaphase-promoting complex subunit 1 (APC1) (Cyclosome subunit 1) (Mitotic checkpoint regulator) (Testis-specific gene 24 protein)	370	18	45	2.54	Ambiguous		Thakar&Karaca	216.5		D	3885
LIPB1_HUMAN	Liprin-beta-1 (Protein tyrosine phosphatase receptor type f polypeptide-interacting protein-binding protein 1) (PTPRF-interacting protein-binding protein 1) (hSGT2)	260	18	31	1.73	Ambiguous			113.18		D	2824
CLUS_HUMAN	Clusterin (Aging-associated gene 4 protein) (Apolipoprotein J) (Apo-J) (Complement cytolysis inhibitor) (CLI) (Complement-associated protein SP-40,40) (Ku70-binding protein 1) (NA1/NA2) (Testosterone-repressed prostate message 2) (TRPM-2) [Cleaved into: Clusterin beta chain (ApoJalpha) (Complement cytolysis inhibitor a chain); Clusterin alpha chain (ApoJbeta) (Complement cytolysis inhibitor b cha…	140	18	17	0.927	Ambiguous	Both	BioGrid	48.803	ER	D	835
ANLN_HUMAN	Actin-binding protein anillin	63	18	7.7	0.434	Ambiguous	Both		124.2		D	4105
TFDP1_HUMAN	Transcription factor Dp-1 (DRTF1-polypeptide 1) (DRTF1) (E2F dimerization partner 1)	400	17	49	2.98	Ambiguous	Nucleus		45.07		D	2091
SMG9_HUMAN	Protein SMG9 (Protein smg-9 homolog)	230	17	28	1.64	Ambiguous			57.65		D	3880
SRRM2_HUMAN	Serine/arginine repetitive matrix protein 2 (300 kDa nuclear matrix antigen) (Serine/arginine-rich splicing factor-related nuclear matrix protein of 300 kDa) (SR-related nuclear matrix protein of 300 kDa) (Ser/Arg-related nuclear matrix protein of 300 kDa) (Splicing coactivator subunit SRm300) (Tax-responsive enhancer element-binding protein 803) (TaxREB803)	230	17	28	1.66	Ambiguous	Nucleus	Thakar&Karaca	299.61		D	4587
FOCAD_HUMAN	Focadhesin	220	17	27	1.58	Ambiguous	Cytoplasm		200.07	TM	D	2493
STIL_HUMAN	SCL-interrupting locus protein (TAL-1-interrupting locus protein)	160	17	19	1.14	Ambiguous	Cytoplasm		142.95		D	2231
TTC5_HUMAN	Tetratricopeptide repeat protein 5 (TPR repeat protein 5) (Stress-responsive activator of p300) (Strap)	130	17	15	0.934	Ambiguous	Both		48.927		D	2949
ARMX5_HUMAN	Armadillo repeat-containing X-linked protein 5	63	17	7.6	0.462	Ambiguous			62.345		D	2572
RL19_HUMAN	60S ribosomal protein L19	370	16	46	2.84	Ambiguous			23.466		D	1773
PININ_HUMAN	Pinin (140 kDa nuclear and cell adhesion-related phosphoprotein) (Desmosome-associated protein) (Domain-rich serine protein) (DRS protein) (DRSP) (Melanoma metastasis clone A protein) (Nuclear protein SDK3) (SR-like protein)	170	16	21	1.28	Ambiguous	Both		81.613		D	3913
PKHA1_HUMAN	Pleckstrin homology domain-containing family A member 1 (PH domain-containing family A member 1) (Tandem PH domain-containing protein 1) (TAPP-1)	110	16	14	0.894	Ambiguous	Both		45.553		D	4037
MEPCE_HUMAN	7SK snRNA methylphosphate capping enzyme (MePCE) (EC 2.1.1.-) (Bicoid-interacting protein 3 homolog) (Bin3 homolog)	75	16	9.2	0.572	Ambiguous		BioGrid	74.354		D	2696
DHX29_HUMAN	ATP-dependent RNA helicase DHX29 (EC 3.6.4.13) (DEAH box protein 29) (Nucleic acid helicase DDXx)	64	16	7.8	0.496	Ambiguous	Cytoplasm		155.23		D	2736
DDX11_HUMAN	Probable ATP-dependent RNA helicase DDX11 (EC 3.6.4.13) (CHL1-related protein 1) (hCHLR1) (DEAD/H box protein 11) (Keratinocyte growth factor-regulated gene 2 protein) (KRG-2)	260	15	32	2.18	Ambiguous	Nucleus		98.686		D	3428
UH1BL_HUMAN	UHRF1-binding protein 1-like	230	15	28	1.82	Ambiguous			164.2		D	2
NCOA2_HUMAN	Nuclear receptor coactivator 2 (NCoA-2) (Class E basic helix-loop-helix protein 75) (bHLHe75) (Transcriptional intermediary factor 2) (hTIF2)	160	15	20	1.3	Ambiguous	Nucleus		159.15		D	2239
CCNK_HUMAN	Cyclin-K	160	15	19	1.28	Ambiguous	Nucleus		64.239		D	516
KIFC3_HUMAN	Kinesin-like protein KIFC3	92	15	11	0.751	Ambiguous	Cytoplasm		92.01		D	3745
NJMU_HUMAN	Protein Njmu-R1	280	14	35	2.47	Ambiguous			44.621		D	4028
KIF2A_HUMAN	Kinesin-like protein KIF2A (Kinesin-2) (hK2)	210	14	26	1.89	Ambiguous	Cytoplasm		75.042		D	115
EXOS6_HUMAN	Exosome complex component MTR3 (Exosome component 6) (mRNA transport regulator 3 homolog) (hMtr3) (p11)	150	14	19	1.34	Ambiguous	Both		28.235		D	2429
NPRL3_HUMAN	Nitrogen permease regulator 3-like protein (-14 gene protein) (Alpha-globin regulatory element-containing gene protein) (Protein CGTHBA)	110	14	14	0.975	Ambiguous			63.604		D	1946
TRI34_HUMAN	Tripartite motif-containing protein 34 (Interferon-responsive finger protein 1) (RING finger protein 21)	110	14	13	0.941	Ambiguous			31.337		D	3792
EWS_HUMAN	RNA-binding protein EWS (EWS oncogene) (Ewing sarcoma breakpoint region 1 protein)	86	14	10	0.733	Ambiguous	Both		62.507		D	1813
ZN185_HUMAN	Zinc finger protein 185 (LIM domain protein ZNF185) (P1-A)	51	14	6.2	0.454	Ambiguous	Cytoplasm		67.281		D	258
MTMR3_HUMAN	Myotubularin-related protein 3 (EC 3.1.3.48) (FYVE domain-containing dual specificity protein phosphatase 1) (FYVE-DSP1) (Phosphatidylinositol-3,5-bisphosphate 3-phosphatase) (EC 3.1.3.95) (Phosphatidylinositol-3-phosphate phosphatase) (EC 3.1.3.64) (Zinc finger FYVE domain-containing protein 10)	380	13	46	3.63	Ambiguous	Cytoplasm		129.44		D	2037
RL10_HUMAN	60S ribosomal protein L10 (Laminin receptor homolog) (Protein QM) (Tumor suppressor QM)	270	13	33	2.52	Ambiguous			24.604		D	1067
TTK_HUMAN	Dual specificity protein kinase TTK (EC 2.7.12.1) (Phosphotyrosine picked threonine-protein kinase) (PYT)	250	13	31	2.37	Ambiguous			96.943		D	1169
ASCC3_HUMAN	Activating signal cointegrator 1 complex subunit 3 (EC 3.6.4.12) (ASC-1 complex subunit p200) (ASC1p200) (Helicase, ATP binding 1) (Trip4 complex subunit p200)	210	13	26	2.04	Ambiguous	Both		251.46		D	2970
YI016_HUMAN	Deleted.	160	13	19	1.51	Ambiguous			41.775		D	30
DCA10_HUMAN	DDB1- and CUL4-associated factor 10 (WD repeat-containing protein 32)	140	13	17	1.3	Ambiguous			60.581		D	2426
RLGPB_HUMAN	Ral GTPase-activating protein subunit beta (p170)	140	13	17	1.3	Ambiguous			166.8		D	2832
CK068_HUMAN	UPF0696 protein C11orf68 (Basophilic leukemia-expressed protein Bles03) (Protein p5326)	100	13	13	0.969	Ambiguous			27.354		D	3916
SPRY4_HUMAN	SPRY domain-containing protein 4	90	13	11	0.817	Ambiguous			23.128		D	3194
TOE1_HUMAN	Target of EGR1 protein 1	61	13	7.5	0.558	Ambiguous	Nucleus		56.547		D	3450
ANKH1_HUMAN	Ankyrin repeat and KH domain-containing protein 1 (HIV-1 Vpr-binding ankyrin repeat protein) (Multiple ankyrin repeats single KH domain) (hMASK)	320	12	39	3.21	Ambiguous	Cytoplasm		269.45		D	2899
MET13_HUMAN	Methyltransferase-like protein 13 (EC 2.1.1.-)	250	12	31	2.56	Ambiguous		Thakar&Karaca	78.767		D	2999
FA21C_HUMAN	WASH complex subunit FAM21C (Vaccinia virus penetration factor) (VPEF)	100	12	13	1.07	Ambiguous	Cytoplasm		144.91		D	4706
SFSWA_HUMAN	Splicing factor, suppressor of white-apricot homolog (Splicing factor, arginine/serine-rich 8) (Suppressor of white apricot protein homolog)	86	12	10	0.903	Ambiguous	Nucleus		104.82		D	1929
CHD8_HUMAN	Chromodomain-helicase-DNA-binding protein 8 (CHD-8) (EC 3.6.4.12) (ATP-dependent helicase CHD8) (Helicase with SNF2 domain 1)	78	12	9.5	0.782	Ambiguous	Nucleus		290.52		D	4062
TENC1_HUMAN	Tensin-like C1 domain-containing phosphatase (EC 3.1.3.-) (C1 domain-containing phosphatase and tensin homolog) (C1-TEN) (Tensin-2)	67	12	8.2	0.677	Ambiguous	Cytoplasm		152.58		D	2512
RB_HUMAN	Retinoblastoma-associated protein (p105-Rb) (pRb) (Rb) (pp110)	62	12	7.6	0.609	Ambiguous	Nucleus		106.16		D	734
SGF29_HUMAN	SAGA-associated factor 29 homolog (Coiled-coil domain-containing protein 101)	58	12	7.1	0.578	Ambiguous	Nucleus		33.238		D	3413
MARK3_HUMAN	MAP/microtubule affinity-regulating kinase 3 (EC 2.7.11.1) (C-TAK1) (cTAK1) (Cdc25C-associated protein kinase 1) (ELKL motif kinase 2) (EMK-2) (Protein kinase STK10) (Ser/Thr protein kinase PAR-1) (Par-1a) (Serine/threonine-protein kinase p78)	53	12	6.5	0.552	Ambiguous	Cytoplasm		74.15		D	1066
FA83D_HUMAN	Protein FAM83D (Spindle protein CHICA)	360	11	44	3.96	Ambiguous	Cytoplasm		64.424		D	3938
SNTA1_HUMAN	Alpha-1-syntrophin (59 kDa dystrophin-associated protein A1 acidic component 1) (Pro-TGF-alpha cytoplasmic domain-interacting protein 1) (TACIP1) (Syntrophin-1)	350	11	43	4	Ambiguous	Cytoplasm		53.895		D	2001
AKAP8_HUMAN	A-kinase anchor protein 8 (AKAP-8) (A-kinase anchor protein 95 kDa) (AKAP 95)	50	11	42	3.82	Ambiguous	Nucleus		76.107		D	354
NCOR1_HUMAN	Nuclear receptor corepressor 1 (N-CoR) (N-CoR1)	250	11	31	2.83	Ambiguous	Nucleus		270.21		D	472
CSKI2_HUMAN	Caskin-2 (CASK-interacting protein 2)	220	11	27	2.54	Ambiguous	Cytoplasm		118.16		D	3204
RTEL1_HUMAN	Regulator of telomere elongation helicase 1 (EC 3.6.4.12) (Novel helicase-like)	210	11	26	2.35	Ambiguous	Nucleus		133.68		D	4293
RL35_HUMAN	60S ribosomal protein L35	190	11	24	2.19	Ambiguous		Thakar&Karaca	14.551		D	1297
BICD1_HUMAN	Protein bicaudal D homolog 1 (Bic-D 1)	79	11	9.6	0.911	Ambiguous	Cytoplasm		95.738		D	3438
MARK2_HUMAN	Serine/threonine-protein kinase MARK2 (EC 2.7.11.1) (EC 2.7.11.26) (ELKL motif kinase 1) (EMK-1) (MAP/microtubule affinity-regulating kinase 2) (PAR1 homolog) (PAR1 homolog b) (Par-1b) (Par1b)	78	11	9.6	0.882	Ambiguous	Cytoplasm		82.55		D	2688
RRP12_HUMAN	RRP12-like protein	58	11	7.1	0.637	Ambiguous	Both	Thakar&Karaca	132.71	TM	D	2417
BUB1_HUMAN	Mitotic checkpoint serine/threonine-protein kinase BUB1 (hBUB1) (EC 2.7.11.1) (BUB1A)	260	10	31	3.15	Ambiguous	Nucleus		115.84		D	336
KLDC4_HUMAN	Kelch domain-containing protein 4	150	10	18	1.77	Ambiguous			54.495		D	3100
ZFAN5_HUMAN	AN1-type zinc finger protein 5 (Zinc finger A20 domain-containing protein 2) (Zinc finger protein 216)	140	10	18	1.78	Ambiguous	Cytoplasm		23.132		D	530
WDR11_HUMAN	WD repeat-containing protein 11 (Bromodomain and WD repeat-containing protein 2) (WD repeat-containing protein 15)	61	10	7.4	0.742	Ambiguous	Both		136.68	TM	D	3812
CASC5_HUMAN	Protein CASC5 (ALL1-fused gene from chromosome 15q14 protein) (AF15q14) (Bub-linking kinetochore protein) (Blinkin) (Cancer susceptibility candidate gene 5 protein) (Cancer/testis antigen 29) (CT29) (Kinetochore-null protein 1) (Protein D40/AF15q14)	130	9.9	15	1.54	Ambiguous	Nucleus		262.63		D	3076
FHL2_HUMAN	Four and a half LIM domains protein 2 (FHL-2) (LIM domain protein DRAL) (Skeletal muscle LIM-protein 3) (SLIM-3)	400	9.7	49	5.08	Ambiguous	Both		32.193		D	2092
F16B2_HUMAN	Protein FAM160B2 (Retinoic acid-induced protein 16)	100	9.7	13	1.31	Ambiguous			82.339		D	2804
APEX2_HUMAN	DNA-(apurinic or apyrimidinic site) lyase 2 (EC 3.1.-.-) (EC 4.2.99.18) (AP endonuclease XTH2) (APEX nuclease 2) (APEX nuclease-like 2) (Apurinic-apyrimidinic endonuclease 2) (AP endonuclease 2)	110	9.6	13	1.38	Ambiguous	Both		57.4		D	4392
DSN1_HUMAN	Kinetochore-associated protein DSN1 homolog	68	9.6	8.3	0.873	Ambiguous	Nucleus		40.067		D	3925
ANR40_HUMAN	Ankyrin repeat domain-containing protein 40	110	9.4	14	1.46	Ambiguous			41.088		D	2534
TSR3_HUMAN	Ribosome biogenesis protein TSR3 homolog	120	9.3	15	1.6	Ambiguous			33.596		D	4459
TYK2_HUMAN	Non-receptor tyrosine-protein kinase TYK2 (EC 2.7.10.2)	81	9.3	9.9	1.07	Ambiguous			133.65		D	1099
SMG5_HUMAN	Protein SMG5 (EST1-like protein B) (LPTS-RP1) (LPTS-interacting protein) (SMG-5 homolog) (hSMG-5)	67	9.3	8.1	0.875	Ambiguous	Both		113.93		D	4573
NECP2_HUMAN	Adaptin ear-binding coat-associated protein 2 (NECAP endocytosis-associated protein 2) (NECAP-2)	350	9.2	42	4.61	Ambiguous	Cytoplasm		28.338		D	4212
OSBL6_HUMAN	Oxysterol-binding protein-related protein 6 (ORP-6) (OSBP-related protein 6)	67	9.1	8.1	0.894	Ambiguous			102.63		D	3808
ALMS1_HUMAN	Alstrom syndrome protein 1	120	9	15	1.64	Ambiguous	Cytoplasm		425.13		D	3115
EIF2A_HUMAN	Eukaryotic translation initiation factor 2A (eIF-2A) (65 kDa eukaryotic translation initiation factor 2A) [Cleaved into: Eukaryotic translation initiation factor 2A, N-terminally processed]	210	8.8	25	2.86	Ambiguous			64.989		D	3787
OSBL3_HUMAN	Oxysterol-binding protein-related protein 3 (ORP-3) (OSBP-related protein 3)	240	8.7	29	3.33	Ambiguous			101.22		D	3940
WNK2_HUMAN	Serine/threonine-protein kinase WNK2 (EC 2.7.11.1) (Antigen NY-CO-43) (Protein kinase lysine-deficient 2) (Protein kinase with no lysine 2) (Serologically defined colon cancer antigen 43)	280	8.6	35	4	Ambiguous	Cytoplasm		234.95		D	4685
SPR2A_HUMAN	Small proline-rich protein 2A (SPR-2A) (2-1)	120	8.6	15	1.68	Ambiguous	Cytoplasm		7.9653		D	998
SBNO2_HUMAN	Protein strawberry notch homolog 2	83	8.5	10	1.2	Ambiguous			144.16		D	4616
AHNK2_HUMAN	Protein AHNAK2	300	8.5	3.4	0.395	Ambiguous	Nucleus		605.64		D	2873
SYNCI_HUMAN	Syncoilin (Syncoilin intermediate filament 1) (Syncoilin-1)	230	8.4	29	3.41	Ambiguous	Cytoplasm		54.946		D	3976
ARIP4_HUMAN	Helicase ARIP4 (EC 3.6.4.12) (Androgen receptor-interacting protein 4) (RAD54-like protein 2)	110	8.4	14	1.64	Ambiguous	Nucleus		162.77		D	4700
CHAP1_HUMAN	Chromosome alignment-maintaining phosphoprotein 1 (Zinc finger protein 828)	53	8.4	6.5	0.77	Ambiguous	Both		89.098		D	3487
FIG4_HUMAN	Polyphosphoinositide phosphatase (EC 3.1.3.-) (Phosphatidylinositol 3,5-bisphosphate 5-phosphatase) (SAC domain-containing protein 3)	54	8.1	6.6	0.821	Ambiguous	Cytoplasm		103.63		D	3228
MTMR5_HUMAN	Myotubularin-related protein 5 (SET-binding factor 1) (Sbf1)	130	8	16	2.04	Ambiguous	Nucleus		208.31		D	586
CD2A2_HUMAN	Cyclin-dependent kinase inhibitor 2A, isoform 4 (p14ARF) (p19ARF)	150	7.8	18	2.34	Ambiguous	Both		8.7308		D	3001
TBB2A_HUMAN	Tubulin beta-2A chain (Tubulin beta class IIa)	170	7.7	21	2.75	Ambiguous	Cytoplasm		49.906		D	2059
NEK6_HUMAN	Serine/threonine-protein kinase Nek6 (EC 2.7.11.1) (Never in mitosis A-related kinase 6) (NimA-related protein kinase 6) (Protein kinase SID6-1512)	150	7.6	18	2.35	Ambiguous	Both		35.714		D	4053
MY18A_HUMAN	Unconventional myosin-XVIIIa (Molecule associated with JAK3 N-terminus) (MAJN) (Myosin containing a PDZ domain)	170	7.5	21	2.8	Ambiguous	Cytoplasm		226.69		D	3239
RPC5_HUMAN	DNA-directed RNA polymerase III subunit RPC5 (RNA polymerase III subunit C5) (DNA-directed RNA polymerase III 80 kDa polypeptide)	110	7.4	13	1.82	Ambiguous	Nucleus		75.757		D	4207
HLTF_HUMAN	Helicase-like transcription factor (EC 3.6.4.-) (EC 6.3.2.-) (DNA-binding protein/plasminogen activator inhibitor 1 regulator) (HIP116) (RING finger protein 80) (SWI/SNF-related matrix-associated actin-dependent regulator of chromatin subfamily A member 3) (Sucrose nonfermenting protein 2-like 3)	55	7.3	6.7	0.921	Ambiguous	Both		113.93		D	2111
ATPB_HUMAN	ATP synthase subunit beta, mitochondrial (EC 3.6.3.14)	150	7.2	19	2.62	Ambiguous	Cytoplasm		56.559	MT	D	737
RN115_HUMAN	E3 ubiquitin-protein ligase RNF115 (EC 6.3.2.-) (RING finger protein 115) (Rabring 7) (Zinc finger protein 364)	69	7.2	8.5	1.17	Ambiguous	Cytoplasm		33.703		D	4719
INT11_HUMAN	Integrator complex subunit 11 (Int11) (EC 3.1.27.-) (Cleavage and polyadenylation-specific factor 3-like protein) (CPSF3-like protein) (Protein related to CPSF subunits of 68 kDa) (RC-68)	66	7.2	8.1	1.12	Ambiguous	Both		56.012		D	2463
RAVR1_HUMAN	Ribonucleoprotein PTB-binding 1 (Protein raver-1)	150	7.1	18	2.51	Ambiguous	Both		77.859		D	2920
KPCZ_HUMAN	Protein kinase C zeta type (EC 2.7.11.13) (nPKC-zeta)	100	7.1	13	1.77	Ambiguous	Cytoplasm		67.659		D	1851
ASAP2_HUMAN	Arf-GAP with SH3 domain, ANK repeat and PH domain-containing protein 2 (Development and differentiation-enhancing factor 2) (Paxillin-associated protein with ARF GAP activity 3) (PAG3) (Pyk2 C-terminus-associated protein) (PAP)	110	7	13	1.87	Ambiguous	Cytoplasm		106.98		D	285
PK3C3_HUMAN	Phosphatidylinositol 3-kinase catalytic subunit type 3 (PI3-kinase type 3) (PI3K type 3) (PtdIns-3-kinase type 3) (EC 2.7.1.137) (Phosphatidylinositol 3-kinase p100 subunit) (Phosphoinositide-3-kinase class 3) (hVps34)	300	6.9	37	5.28	Ambiguous	Cytoplasm		101.55		D	3056
EP300_HUMAN	Histone acetyltransferase p300 (p300 HAT) (EC 2.3.1.48) (E1A-associated protein p300)	63	6.9	7.7	1.12	Ambiguous	Both		264.16		D	1906
E2AK1_HUMAN	Eukaryotic translation initiation factor 2-alpha kinase 1 (EC 2.7.11.1) (Heme-controlled repressor) (HCR) (Heme-regulated eukaryotic initiation factor eIF-2-alpha kinase) (Heme-regulated inhibitor) (Hemin-sensitive initiation factor 2-alpha kinase)	190	6.8	23	3.42	Ambiguous	Cytoplasm		71.035		D	3657
PYGO2_HUMAN	Pygopus homolog 2	290	6.7	35	5.25	Ambiguous	Nucleus		41.244		D	3676
WWC3_HUMAN	Protein WWC3	100	6.7	13	1.88	Ambiguous			122.67		D	4513
LATS1_HUMAN	Serine/threonine-protein kinase LATS1 (EC 2.7.11.1) (Large tumor suppressor homolog 1) (WARTS protein kinase) (h-warts)	68	6.7	8.3	1.24	Ambiguous	Cytoplasm		126.87		D	651
WDR7_HUMAN	WD repeat-containing protein 7 (Rabconnectin-3 beta) (TGF-beta resistance-associated protein TRAG)	61	6.7	7.4	1.11	Ambiguous			160.51		D	4707
RBBP5_HUMAN	Retinoblastoma-binding protein 5 (RBBP-5) (Retinoblastoma-binding protein RBQ-3)	210	6.6	26	3.9	Ambiguous	Nucleus		55.071		D	2205
MPP5_HUMAN	MAGUK p55 subfamily member 5	180	6.6	23	3.43	Ambiguous	Cytoplasm		73.421		D	2975
ARHG5_HUMAN	Rho guanine nucleotide exchange factor 5 (Ephexin-3) (Guanine nucleotide regulatory protein TIM) (Oncogene TIM) (Transforming immortalized mammary oncogene) (p60 TIM)	240	6.5	30	4.61	Ambiguous			176.8		D	1919
TSR1_HUMAN	Pre-rRNA-processing protein TSR1 homolog	260	6.4	31	4.85	Ambiguous	Nucleus	Thakar&Karaca	91.809		D	2324
RCOR1_HUMAN	REST corepressor 1 (Protein CoREST)	250	6.2	30	4.84	Ambiguous	Both		53.027		D	4494
MRE11_HUMAN	Double-strand break repair protein MRE11A (Meiotic recombination 11 homolog 1) (MRE11 homolog 1) (Meiotic recombination 11 homolog A) (MRE11 homolog A)	73	6.1	8.9	1.48	Ambiguous	Nucleus		77.641		D	1414
MET14_HUMAN	N6-adenosine-methyltransferase subunit METTL14 (EC 2.1.1.62) (Methyltransferase-like protein 14)	96	6	12	1.96	Ambiguous	Nucleus		52.15		D	4057
ATN1_HUMAN	Atrophin-1 (Dentatorubral-pallidoluysian atrophy protein)	85	6	10	1.74	Ambiguous	Both		125.41		D	1531
WASF2_HUMAN	Wiskott-Aldrich syndrome protein family member 2 (WASP family protein member 2) (Protein WAVE-2) (Verprolin homology domain-containing protein 2)	330	5.9	40	6.75	Ambiguous	Cytoplasm		54.283		D	4800
RL27_HUMAN	60S ribosomal protein L27	290	5.8	35	6.06	Ambiguous			15.798		D	1625
XP32_HUMAN	Skin-specific protein 32	320	5.7	39	6.91	Ambiguous			26.238		D	2456
PARP4_HUMAN	Poly [ADP-ribose] polymerase 4 (PARP-4) (EC 2.4.2.30) (193 kDa vault protein) (ADP-ribosyltransferase diphtheria toxin-like 4) (ARTD4) (PARP-related/IalphaI-related H5/proline-rich) (PH5P) (Vault poly(ADP-ribose) polymerase) (VPARP)	270	5.7	32	5.63	Ambiguous	Both		192.59		D	4492
RBP1_HUMAN	RalA-binding protein 1 (RalBP1) (76 kDa Ral-interacting protein) (Dinitrophenyl S-glutathione ATPase) (DNP-SG ATPase) (Ral-interacting protein 1)	98	5.7	12	2.08	Ambiguous	Cytoplasm		76.063		D	2207
PML_HUMAN	Protein PML (Promyelocytic leukemia protein) (RING finger protein 71) (Tripartite motif-containing protein 19)	78	5.7	9.5	1.69	Ambiguous	Both		62.006		D	1098
SCRIB_HUMAN	Protein scribble homolog (Scribble) (hScrib) (Protein LAP4)	69	5.7	8.4	1.49	Ambiguous	Cytoplasm		174.88		D	2085
U2AF2_HUMAN	Splicing factor U2AF 65 kDa subunit (U2 auxiliary factor 65 kDa subunit) (hU2AF(65)) (hU2AF65) (U2 snRNP auxiliary factor large subunit)	51	5.7	6.2	1.09	Ambiguous	Nucleus		53.12		D	1051
ANR17_HUMAN	Ankyrin repeat domain-containing protein 17 (Gene trap ankyrin repeat protein) (Serologically defined breast cancer antigen NY-BR-16)	390	5.5	48	8.71	Ambiguous	Both		263.55		D	458
KCC2G_HUMAN	Calcium/calmodulin-dependent protein kinase type II subunit gamma (CaM kinase II subunit gamma) (CaMK-II subunit gamma) (EC 2.7.11.17)	260	5.5	32	5.91	Ambiguous	Cytoplasm		55.96		D	2026
DNMBP_HUMAN	Dynamin-binding protein (Scaffold protein Tuba)	86	5.5	10	1.9	Ambiguous	Cytoplasm		177.35		D	2642
ASPP2_HUMAN	Apoptosis-stimulating of p53 protein 2 (Bcl2-binding protein) (Bbp) (Renal carcinoma antigen NY-REN-51) (Tumor suppressor p53-binding protein 2) (53BP2) (p53-binding protein 2) (p53BP2)	290	5.4	36	6.67	Ambiguous	Both		111.43		D	2043
TAF9_HUMAN	Transcription initiation factor TFIID subunit 9 (RNA polymerase II TBP-associated factor subunit G) (STAF31/32) (Transcription initiation factor TFIID 31 kDa subunit) (TAFII-31) (TAFII31) (Transcription initiation factor TFIID 32 kDa subunit) (TAFII-32) (TAFII32)	100	5.4	12	2.26	Ambiguous	Nucleus		28.974		D	2288
EIF3A_HUMAN	Eukaryotic translation initiation factor 3 subunit A (eIF3a) (Eukaryotic translation initiation factor 3 subunit 10) (eIF-3-theta) (eIF3 p167) (eIF3 p180) (eIF3 p185)	340	5.2	42	8.12	Ambiguous	Cytoplasm		166.57		D	2081
KBRS2_HUMAN	NF-kappa-B inhibitor-interacting Ras-like protein 2 (I-kappa-B-interacting Ras-like protein 2) (Kappa B-Ras protein 2) (KappaB-Ras2)	220	5.2	27	5.24	Ambiguous	Cytoplasm		21.292		D	4281
RBM39_HUMAN	RNA-binding protein 39 (CAPER alpha) (Hepatocellular carcinoma protein 1) (RNA-binding motif protein 39) (RNA-binding region-containing protein 2) (Splicing factor HCC1)	320	5.1	39	7.67	Ambiguous	Nucleus		57.089		D	2110
BL1S1_HUMAN	Biogenesis of lysosome-related organelles complex 1 subunit 1 (BLOC-1 subunit 1) (GCN5-like protein 1) (Protein RT14)	270	5.1	33	6.4	Ambiguous	Cytoplasm		14.311		D	1755
NELFA_HUMAN	Negative elongation factor A (NELF-A) (Wolf-Hirschhorn syndrome candidate 2 protein)	170	5.1	21	4.04	Ambiguous	Nucleus		57.276		D	3918
PAR10_HUMAN	Poly [ADP-ribose] polymerase 10 (PARP-10) (EC 2.4.2.30) (ADP-ribosyltransferase diphtheria toxin-like 10) (ARTD10)	160	5	19	3.81	Ambiguous	Both	NESdbH	110		D	2379
GAB1_HUMAN	GRB2-associated-binding protein 1 (GRB2-associated binder 1) (Growth factor receptor bound protein 2-associated protein 1)	130	5	16	3.16	Ambiguous			76.615		D	2015
CIC_HUMAN	Protein capicua homolog	57	5	6.9	1.39	Ambiguous	Nucleus		163.82		D	3555
VP33A_HUMAN	Vacuolar protein sorting-associated protein 33A (hVPS33A)	220	4.9	26	5.33	Ambiguous	Cytoplasm		67.61		D	3335
PAR6B_HUMAN	Partitioning defective 6 homolog beta (PAR-6 beta) (PAR-6B)	69	4.9	8.4	1.7	Ambiguous	Cytoplasm		41.182		D	3791
SF3B4_HUMAN	Splicing factor 3B subunit 4 (Pre-mRNA-splicing factor SF3b 49 kDa subunit) (SF3b50) (Spliceosome-associated protein 49) (SAP 49)	65	4.9	8	1.62	Ambiguous	Nucleus		44.385		D	2223
FBX3_HUMAN	F-box only protein 3	340	4.8	42	8.68	Ambiguous	Nucleus		54.56		D	4480
EXOS8_HUMAN	Exosome complex component RRP43 (Exosome component 8) (Opa-interacting protein 2) (OIP-2) (Ribosomal RNA-processing protein 43) (p9)	85	4.8	10	2.16	Ambiguous	Both		30.039		D	3341
RL31_HUMAN	60S ribosomal protein L31	79	4.8	9.7	2.01	Ambiguous		Thakar&Karaca	13.995		D	1698
MUC16_HUMAN	Mucin-16 (MUC-16) (Ovarian cancer-related tumor marker CA125) (CA-125) (Ovarian carcinoma antigen CA125)	69	4.8	8.5	1.77	Ambiguous	Cytoplasm		2284.3	TM	D	3209
CAMP3_HUMAN	Calmodulin-regulated spectrin-associated protein 3 (Protein Nezha)	170	4.6	21	4.58	Ambiguous	Cytoplasm		134.75		D	4330
NEP1_HUMAN	Ribosomal RNA small subunit methyltransferase NEP1 (EC 2.1.1.-) (18S rRNA (pseudouridine(1248)-N1)-methyltransferase) (18S rRNA Psi1248 methyltransferase) (Nucleolar protein EMG1 homolog) (Protein C2f) (Ribosome biogenesis protein NEP1)	360	4.5	44	9.78	Ambiguous	Nucleus		26.72		D	3282
KBTB6_HUMAN	Kelch repeat and BTB domain-containing protein 6	250	4.5	30	6.7	Ambiguous			76.137		D	2806
TRIPC_HUMAN	E3 ubiquitin-protein ligase TRIP12 (EC 6.3.2.-) (E3 ubiquitin-protein ligase for Arf) (ULF) (Thyroid receptor-interacting protein 12) (TR-interacting protein 12) (TRIP-12)	250	4.4	30	6.81	Ambiguous	Nucleus		192.07		D	2123
ZFP91_HUMAN	E3 ubiquitin-protein ligase ZFP91 (EC 6.3.2.-) (Zinc finger protein 757) (Zinc finger protein 91 homolog) (Zfp-91)	230	4.4	28	6.35	Ambiguous	Nucleus		59.57		D	3488
YBOX3_HUMAN	Y-box-binding protein 3 (Cold shock domain-containing protein A) (DNA-binding protein A) (Single-strand DNA-binding protein NF-GMB)	72	4.3	8.8	2.05	Ambiguous	Both		40.089		D	927
AKP13_HUMAN	A-kinase anchor protein 13 (AKAP-13) (AKAP-Lbc) (Breast cancer nuclear receptor-binding auxiliary protein) (Guanine nucleotide exchange factor Lbc) (Human thyroid-anchoring protein 31) (Lymphoid blast crisis oncogene) (LBC oncogene) (Non-oncogenic Rho GTPase-specific GTP exchange factor) (Protein kinase A-anchoring protein 13) (PRKA13) (p47)	290	4.2	35	8.31	Ambiguous	Both		307.55		D	1924
REPS1_HUMAN	RalBP1-associated Eps domain-containing protein 1 (RalBP1-interacting protein 1)	230	4.2	28	6.68	Ambiguous	Cytoplasm		86.59		D	3382
SRR_HUMAN	Serine racemase (EC 4.3.1.17) (EC 4.3.1.18) (EC 5.1.1.18) (D-serine ammonia-lyase) (D-serine dehydratase) (L-serine ammonia-lyase) (L-serine dehydratase)	210	4.1	25	6.26	Ambiguous			36.566		D	3844
MED27_HUMAN	Mediator of RNA polymerase II transcription subunit 27 (Cofactor required for Sp1 transcriptional activation subunit 8) (CRSP complex subunit 8) (Mediator complex subunit 27) (P37 TRAP/SMCC/PC2 subunit) (Transcriptional coactivator CRSP34)	80	4.1	9.7	2.35	Ambiguous	Nucleus		31.351		D	2577
WDR47_HUMAN	WD repeat-containing protein 47 (Neuronal enriched MAP-interacting protein) (Nemitin)	60	4.1	7.3	1.77	Ambiguous	Cytoplasm		98.515		D	562
SYFA_HUMAN	Phenylalanine--tRNA ligase alpha subunit (EC 6.1.1.20) (CML33) (Phenylalanyl-tRNA synthetase alpha subunit) (PheRS)	100	3.9	62	15.8	Ambiguous	Cytoplasm		57.563		D	4607
GEMI_HUMAN	Geminin	300	3.9	37	9.28	Ambiguous	Both		23.565		D	483
TSSC4_HUMAN	Protein TSSC4 (Tumor-suppressing STF cDNA 4 protein) (Tumor-suppressing subchromosomal transferable fragment candidate gene 4 protein)	230	3.9	28	7.11	Ambiguous			27.935		D	4761
SHRPN_HUMAN	Sharpin (Shank-associated RH domain-interacting protein) (Shank-interacting protein-like 1) (hSIPL1)	170	3.9	21	5.26	Ambiguous	Cytoplasm		33.877		D	3866
DNJA1_HUMAN	DnaJ homolog subfamily A member 1 (DnaJ protein homolog 2) (HSDJ) (Heat shock 40 kDa protein 4) (Heat shock protein J2) (HSJ-2) (Human DnaJ protein 2) (hDj-2)	450	3.8	1400	359	Ambiguous	Both		44.868		D	1141
MAST2_HUMAN	Microtubule-associated serine/threonine-protein kinase 2 (EC 2.7.11.1)	370	3.8	45	11.9	Ambiguous	Cytoplasm		196.43		D	2568
CX056_HUMAN	UPF0428 protein CXorf56	180	3.8	22	5.75	Ambiguous			19.981		D	3948
MTMR2_HUMAN	Myotubularin-related protein 2 (Phosphatidylinositol-3,5-bisphosphate 3-phosphatase) (EC 3.1.3.95) (Phosphatidylinositol-3-phosphate phosphatase) (EC 3.1.3.64)	160	3.8	19	5.13	Ambiguous	Cytoplasm		73.38		D	2036
IFIT3_HUMAN	Interferon-induced protein with tetratricopeptide repeats 3 (IFIT-3) (CIG49) (ISG-60) (Interferon-induced 60 kDa protein) (IFI-60K) (Interferon-induced protein with tetratricopeptide repeats 4) (IFIT-4) (Retinoic acid-induced gene G protein) (P60) (RIG-G)	99	3.8	12	3.16	Ambiguous	Cytoplasm		55.984		D	212
TPP1_HUMAN	Tripeptidyl-peptidase 1 (TPP-1) (EC 3.4.14.9) (Cell growth-inhibiting gene 1 protein) (Lysosomal pepstatin-insensitive protease) (LPIC) (Tripeptidyl aminopeptidase) (Tripeptidyl-peptidase I) (TPP-I)	100	3.8	12	3.22	Ambiguous	Cytoplasm		34.463	ER	D	202
SKIV2_HUMAN	Helicase SKI2W (Ski2) (EC 3.6.4.-) (Helicase-like protein) (HLP)	94	3.8	11	3	Ambiguous	Both		137.75		D	2232
C19L1_HUMAN	CWF19-like protein 1	140	3.7	17	4.55	Ambiguous			60.618		D	2532
AGAP3_HUMAN	Arf-GAP with GTPase, ANK repeat and PH domain-containing protein 3 (AGAP-3) (CRAM-associated GTPase) (CRAG) (Centaurin-gamma-3) (Cnt-g3) (MR1-interacting protein) (MRIP-1)	91	3.7	11	2.96	Ambiguous	Cytoplasm		95.043		D	3529
TUT7_HUMAN	Terminal uridylyltransferase 7 (TUTase 7) (EC 2.7.7.52) (Zinc finger CCHC domain-containing protein 6)	79	3.7	9.7	2.59	Ambiguous			166.97		D	2500
FRG1_HUMAN	Protein FRG1 (FSHD region gene 1 protein)	50	3.7	6.1	1.66	Ambiguous	Both		29.172		D	2106
ATG13_HUMAN	Autophagy-related protein 13	310	3.6	38	10.6	Ambiguous	Cytoplasm		44.486		D	445
ULK1_HUMAN	Serine/threonine-protein kinase ULK1 (EC 2.7.11.1) (Autophagy-related protein 1 homolog) (ATG1) (hATG1) (Unc-51-like kinase 1)	140	3.6	18	4.95	Ambiguous	Cytoplasm		112.63		D	473
FUS_HUMAN	RNA-binding protein FUS (75 kDa DNA-pairing protein) (Oncogene FUS) (Oncogene TLS) (POMp75) (Translocated in liposarcoma protein)	150	3.5	18	5.28	Ambiguous	Nucleus		53.354		D	1199
TBB2B_HUMAN	Tubulin beta-2B chain	280	3.4	200	59.1	Ambiguous	Cytoplasm		49.953		D	3741
CPSF5_HUMAN	Cleavage and polyadenylation specificity factor subunit 5 (Cleavage and polyadenylation specificity factor 25 kDa subunit) (CFIm25) (CPSF 25 kDa subunit) (Nucleoside diphosphate-linked moiety X motif 21) (Nudix motif 21) (Pre-mRNA cleavage factor Im 25 kDa subunit)	450	3.4	55	16.2	Ambiguous	Nucleus		26.227		D	349
RPR1A_HUMAN	Regulation of nuclear pre-mRNA domain-containing protein 1A (Cyclin-dependent kinase inhibitor 2B-related protein) (p15INK4B-related protein)	370	3.4	46	13.4	Ambiguous			35.719		D	3528
SRSF3_HUMAN	Serine/arginine-rich splicing factor 3 (Pre-mRNA-splicing factor SRP20) (Splicing factor, arginine/serine-rich 3)	190	3.4	24	6.88	Ambiguous	Both		19.329		D	1774
MYCPP_HUMAN	C-myc promoter-binding protein (DENN domain-containing protein 4A)	68	3.4	8.3	2.4	Ambiguous	Nucleus		209.24		D	2731
MTMR1_HUMAN	Myotubularin-related protein 1 (Phosphatidylinositol-3-phosphate phosphatase) (EC 3.1.3.64)	390	3.3	47	14.5	Ambiguous	Cytoplasm		74.677		D	2035
CDK9_HUMAN	Cyclin-dependent kinase 9 (EC 2.7.11.22) (EC 2.7.11.23) (C-2K) (Cell division cycle 2-like protein kinase 4) (Cell division protein kinase 9) (Serine/threonine-protein kinase PITALRE) (Tat-associated kinase complex catalytic subunit)	340	3.3	42	12.8	Ambiguous	Both		42.777		D	1438
HPS3_HUMAN	Hermansky-Pudlak syndrome 3 protein	190	3.3	23	6.96	Ambiguous	Cytoplasm		113.73		D	3299
PAIRB_HUMAN	Plasminogen activator inhibitor 1 RNA-binding protein (PAI1 RNA-binding protein 1) (PAI-RBP1) (SERPINE1 mRNA-binding protein 1)	81	3.3	9.9	3.03	Ambiguous	Both		42.426		D	3038
K0825_HUMAN	Uncharacterized protein KIAA0825	72	3.3	8.8	2.7	Ambiguous			108.82		D	2869
VP33B_HUMAN	Vacuolar protein sorting-associated protein 33B (hVPS33B)	310	3.2	37	11.7	Ambiguous	Cytoplasm		70.584		D	3896
CCZ1_HUMAN	Vacuolar fusion protein CCZ1 homolog	120	3.2	14	4.42	Ambiguous	Cytoplasm		55.866		D	1776
PESC_HUMAN	Pescadillo homolog	91	3.2	11	3.45	Ambiguous	Nucleus		67.455		D	163
STRN4_HUMAN	Striatin-4 (Zinedin)	430	3.1	52	16.8	Ambiguous	Cytoplasm		80.595		D	4136
GCR_HUMAN	Glucocorticoid receptor (GR) (Nuclear receptor subfamily 3 group C member 1)	350	3.1	43	13.8	Ambiguous	Both		81.509		D	704
ERH_HUMAN	Enhancer of rudimentary homolog	230	3.1	28	9	Ambiguous			12.259		D	1771
LC7L3_HUMAN	Luc7-like protein 3 (Cisplatin resistance-associated-overexpressed protein) (Luc7A) (Okadaic acid-inducible phosphoprotein OA48-18) (cAMP regulatory element-associated protein 1) (CRE-associated protein 1) (CREAP-1)	85	3.1	10	3.31	Ambiguous	Nucleus		51.466		D	583
MP2K1_HUMAN	Dual specificity mitogen-activated protein kinase kinase 1 (MAP kinase kinase 1) (MAPKK 1) (MKK1) (EC 2.7.12.2) (ERK activator kinase 1) (MAPK/ERK kinase 1) (MEK 1)	460	3	570	188	Ambiguous	Both	NESdbO, BioGrid	43.439		D	1821
RS27_HUMAN	40S ribosomal protein S27 (Metallopan-stimulin 1) (MPS-1)	440	3	54	17.7	Ambiguous			9.461		D	1292
STRN_HUMAN	Striatin	300	3	36	12.1	Ambiguous	Cytoplasm		86.131		D	351
SPF27_HUMAN	Pre-mRNA-splicing factor SPF27 (Breast carcinoma-amplified sequence 2) (DNA amplified in mammary carcinoma 1 protein) (Spliceosome-associated protein SPF 27)	57	3	7	2.32	Ambiguous	Nucleus		26.131		D	517
RANB3_HUMAN	Ran-binding protein 3 (RanBP3)	17	85	9300	110	CRM1 Cofactor	Both	BioGrid	53.41		D.B NTR_CRM1 cofactor	3969
RAE1L_HUMAN	mRNA export factor (Rae1 protein homolog) (mRNA-associated protein mrnp 41)	4200	1600	510	0.313	NPC	Both		40.968		D.B. NPC	1752
RANG_HUMAN	Ran-binding protein 1 (RanBP1)	13000	1.1	1600	1380	CRM1 Cofactor		NESdbH, BioGrid, Thakar&Karaca	23.31		D.B. NPC	1306
UBC9_HUMAN	SUMO-conjugating enzyme UBC9 (EC 6.3.2.-) (SUMO-protein ligase) (Ubiquitin carrier protein 9) (Ubiquitin carrier protein I) (Ubiquitin-conjugating enzyme E2 I) (Ubiquitin-protein ligase I) (p18)	1900	0.93	240	252	NPC	Both	BioGrid	18.007		D.B. NPC	1721
IMA1_HUMAN	Importin subunit alpha-1 (Karyopherin subunit alpha-2) (RAG cohort protein 1) (SRP1-alpha)	6800	1.5	840	574	NTR	Both	Thakar&Karaca	57.861		D.B. NTR	1480
XPO2_HUMAN	Exportin-2 (Exp2) (Cellular apoptosis susceptibility protein) (Chromosome segregation 1-like protein) (Importin-alpha re-exporter)	9.9	0.99	21	21.2	NTR	Both	BioGrid	107.78		D.B. NTR	1547
IMA5_HUMAN	Importin subunit alpha-5 (Karyopherin subunit alpha-1) (Nucleoprotein interactor 1) (NPI-1) (RAG cohort protein 2) (SRP1-beta) [Cleaved into: Importin subunit alpha-5, N-terminally processed]	480	0.52	59	114	NTR	Both	Thakar&Karaca	60.221		D.B. NTR	1481
IMA4_HUMAN	Importin subunit alpha-4 (Importin alpha Q2) (Qip2) (Karyopherin subunit alpha-3) (SRP1-gamma)	560	0.29	68	232	NTR	Both	Thakar&Karaca	57.81		D.B. NTR	157
IMA7_HUMAN	Importin subunit alpha-7 (Karyopherin subunit alpha-6)	440	0.19	54	289	NTR		Thakar&Karaca	60.029		D.B. NTR	408
IMA3_HUMAN	Importin subunit alpha-3 (Importin alpha Q1) (Qip1) (Karyopherin subunit alpha-4)	620	0.16	76	474	NTR	Both	Thakar&Karaca	57.886		D.B. NTR	169
IPO4_HUMAN	Importin-4 (Imp4) (Importin-4b) (Imp4b) (Ran-binding protein 4) (RanBP4)	72	0.081	8.8	109	NTR	Both	Thakar&Karaca	118.71		D.B. NTR	3147
IPO7_HUMAN	Importin-7 (Imp7) (Ran-binding protein 7) (RanBP7)	80	0.05	9.7	197	NTR	Both		119.52		D.B. NTR	602
IPO5_HUMAN	Importin-5 (Imp5) (Importin subunit beta-3) (Karyopherin beta-3) (Ran-binding protein 5) (RanBP5)	42	0.035	5.2	147	NTR	Both		123.63		D.B. NTR	144
IPO9_HUMAN	Importin-9 (Imp9) (Ran-binding protein 9) (RanBP9)	4.2	0.013	0.51	39.4	NTR	Both		115.96		D.B. NTR	3533
IMB1_HUMAN	Importin subunit beta-1 (Importin-90) (Karyopherin subunit beta-1) (Nuclear factor p97) (Pore targeting complex 97 kDa subunit) (PTAC97)	0.79	0.012	3.2	258	NTR	Both		97.169		D.B. NTR	2151
XPO5_HUMAN	Exportin-5 (Exp5) (Ran-binding protein 21)	1.4	0.0091	0.17	18.8	NTR	Both		136.31		D.B. NTR	4032
IPO11_HUMAN	Importin-11 (Imp11) (Ran-binding protein 11) (RanBP11)	0	0	0	13.8	NTR	Both		112.53		D.B. NTR	4439
IPO8_HUMAN	Importin-8 (Imp8) (Ran-binding protein 8) (RanBP8)	0	0	0	31.3	NTR	Both	Thakar&Karaca	119.94		D.B. NTR	274
TNPO1_HUMAN	Transportin-1 (Importin beta-2) (Karyopherin beta-2) (M9 region interaction protein) (MIP)	0	0	0	20	NTR	Both	Thakar&Karaca	101.31		D.B. NTR	3280
TNPO3_HUMAN	Transportin-3 (Importin-12) (Imp12) (Transportin-SR) (TRN-SR)	0	0	0	6.11	NTR	Both		102.54		D.B. NTR	4749
XPO4_HUMAN	Exportin-4 (Exp4)	0	0	0	1.25	NTR	Both		130.14		D.B. NTR	3834
XPO7_HUMAN	Exportin-7 (Exp7) (Ran-binding protein 16)	0	0	0	20.3	NTR	Both	BioGrid	123.91		D.B. NTR	4443
XPOT_HUMAN	Exportin-T (Exportin(tRNA)) (tRNA exportin)	0	0	0	81.6	NTR	Both		109.96		D.B. NTR	328
NUPL1_HUMAN	Nucleoporin p58/p45 (Nucleoporin-like protein 1)	1300	2500	160	0.0437	NUP	Both		50.21		D.B. Nup	3749
NUP54_HUMAN	Nucleoporin p54 (54 kDa nucleoporin)	2300	350	280	0.787	NUP	Both		50.775		D.B. Nup	2724
NU153_HUMAN	Nuclear pore complex protein Nup153 (153 kDa nucleoporin) (Nucleoporin Nup153)	120	330	14	0.0437	NUP	Both	BioGrid	153.94		D.B. Nup	1404
P121A_HUMAN	Nuclear envelope pore membrane protein POM 121 (Nuclear envelope pore membrane protein POM 121A) (Nucleoporin Nup121) (Pore membrane protein of 121 kDa)	90	250	11	0.0437	NUP	Both		99.036	TM	D.B. Nup	36
NUP98_HUMAN	Nuclear pore complex protein Nup98-Nup96 [Cleaved into: Nuclear pore complex protein Nup98 (98 kDa nucleoporin) (Nucleoporin Nup98) (Nup98); Nuclear pore complex protein Nup96 (96 kDa nucleoporin) (Nucleoporin Nup96) (Nup96)]	5.1	100	130	1.28	NUP	Both		186.27		D.B. Nup	1502
NUP88_HUMAN	Nuclear pore complex protein Nup88 (88 kDa nucleoporin) (Nucleoporin Nup88)	7.7	78	1900	24.8	NUP	Nucleus	BioGrid	83.541		D.B. Nup	3598
NUP62_HUMAN	Nuclear pore glycoprotein p62 (62 kDa nucleoporin) (Nucleoporin Nup62)	45	58	1900	32	NUP	Both	BioGrid	53.254		D.B. Nup	1226
RBP2_HUMAN	E3 SUMO-protein ligase RanBP2 (EC 6.3.2.-) (358 kDa nucleoporin) (Nuclear pore complex protein Nup358) (Nucleoporin Nup358) (Ran-binding protein 2) (RanBP2) (p270)	33	48	100	2.16	NUP	Both		358.2		D.B. Nup	1405
NU214_HUMAN	Nuclear pore complex protein Nup214 (214 kDa nucleoporin) (Nucleoporin Nup214) (Protein CAN)	25	35	1400	40.5	NUP	Both	BioGrid	212.57		D.B. Nup	1200
NU188_HUMAN	Nucleoporin NUP188 homolog (hNup188)	81	33	400	12.1	NUP	Nucleus	BioGrid, Thakar&Karaca	196.04		D.B. Nup	2430
NUP93_HUMAN	Nuclear pore complex protein Nup93 (93 kDa nucleoporin) (Nucleoporin Nup93)	5.4	12	730	63	NUP	Both	Thakar&Karaca	93.487		D.B. Nup	2957
NU160_HUMAN	Nuclear pore complex protein Nup160 (160 kDa nucleoporin) (Nucleoporin Nup160)	1400	6.6	170	26.3	NUP	Nucleus	Thakar&Karaca	162.12		D.B. Nup	1918
NUP85_HUMAN	Nuclear pore complex protein Nup85 (85 kDa nucleoporin) (FROUNT) (Nucleoporin Nup75) (Nucleoporin Nup85) (Pericentrin-1)	1400	6.3	170	26.7	NUP	Both		75.019		D.B. Nup	3759
SEH1_HUMAN	Nucleoporin SEH1 (Nup107-160 subcomplex subunit SEH1) (SEC13-like protein)	1100	4.4	140	30.5	NUP	Nucleus		46.578		D.B. Nup	3402
NUP43_HUMAN	Nucleoporin Nup43 (Nup107-160 subcomplex subunit Nup43) (p42)	2100	3.3	260	78.6	NUP	Nucleus		42.15		D.B. Nup	3069
NU107_HUMAN	Nuclear pore complex protein Nup107 (107 kDa nucleoporin) (Nucleoporin Nup107)	290	3.1	36	11.7	NUP	Both		106.37		D.B. Nup	1581
NUP37_HUMAN	Nucleoporin Nup37 (p37) (Nup107-160 subcomplex subunit Nup37)	2900	2.6	360	136	NUP	Nucleus		36.707		D.B. Nup	3070
NU133_HUMAN	Nuclear pore complex protein Nup133 (133 kDa nucleoporin) (Nucleoporin Nup133)	41	0.6	5	8.39	NUP	Both		128.98		D.B. Nup	3169
NU205_HUMAN	Nuclear pore complex protein Nup205 (205 kDa nucleoporin) (Nucleoporin Nup205)	130	0.57	16	27.2	NUP	Both		227.92		D.B. Nup	3244
NU155_HUMAN	Nuclear pore complex protein Nup155 (155 kDa nucleoporin) (Nucleoporin Nup155)	33	0.28	4	14.4	NUP	Both		155.2		D.B. Nup	497
TNR6A_HUMAN	Trinucleotide repeat-containing gene 6A protein (CAG repeat protein 26) (EMSY interactor protein) (GW182 autoantigen) (Protein GW1) (Glycine-tryptophan protein of 182 kDa)	39	210	9.4	0.0437	Ambiguous	Cytoplasm		182.05		D.C.	3053
CPEB3_HUMAN	Cytoplasmic polyadenylation element-binding protein 3 (CPE-BP3) (CPE-binding protein 3) (hCPEB-3)	6.6	190	8.4	0.0437	Ambiguous		NESdbO	74.44		D.C.	3054
TBC30_HUMAN	TBC1 domain family member 30	11	190	8.1	0.0437	Ambiguous	Cytoplasm		102.74		D.C.	4623
SCLT1_HUMAN	Sodium channel and clathrin linker 1 (Sodium channel-associated protein 1)	12	150	6.6	0.0437	Ambiguous	Cytoplasm		80.909		D.C.	3523
TALD3_HUMAN	Protein TALPID3	42	150	5.2	0.0351	Ambiguous	Cytoplasm		166.42		D.C.	3756
P2R3C_HUMAN	Serine/threonine-protein phosphatase 2A regulatory subunit B'' subunit gamma (Protein phosphatase subunit G5PR) (Rhabdomyosarcoma antigen MU-RMS-40.6A/6C)	27	140	6.2	0.0437	Ambiguous	Both		53.315		D.C.	3309
CENPJ_HUMAN	Centromere protein J (CENP-J) (Centrosomal P4.1-associated protein) (LAG-3-associated protein) (LYST-interacting protein 1)	28	140	3.5	0.0243	Ambiguous	Cytoplasm		153		D.C.	4052
FA83H_HUMAN	Protein FAM83H	43	110	5.3	0.0501	Ambiguous			127.12		D.C.	2653
GSDMA_HUMAN	Gasdermin-A (Gasdermin-1)	10	110	4.7	0.0437	Ambiguous	Cytoplasm		49.364		D.C.	3544
POF1B_HUMAN	Protein POF1B (Premature ovarian failure protein 1B)	5.3	68	3	0.0437	Ambiguous	Cytoplasm		68.064		D.C.	3188
MAST3_HUMAN	Microtubule-associated serine/threonine-protein kinase 3 (EC 2.7.11.1)	34	65	4.2	0.0638	Ambiguous			143.14		D.C.	376
ZFY27_HUMAN	Protrudin (Zinc finger FYVE domain-containing protein 27)	1.6	54	2.3	0.0437	Ambiguous	Cytoplasm		31.744	TM	D.C.	2446
TRHY_HUMAN	Trichohyalin	6.3	54	0.77	0.0144	Ambiguous			253.92		D.C.	1873
PLOD3_HUMAN	Procollagen-lysine,2-oxoglutarate 5-dioxygenase 3 (EC 1.14.11.4) (Lysyl hydroxylase 3) (LH3)	8.3	51	9.1	0.177	Ambiguous	Cytoplasm		84.784	ER	D.C.	399
GSE1_HUMAN	Genetic suppressor element 1	45	48	5.5	0.116	Ambiguous			128.92		D.C.	2130
CL16A_HUMAN	Protein CLEC16A (C-type lectin domain family 16 member A)	43	48	5.3	0.11	Ambiguous	Cytoplasm		103.55		D.C.	2316
ZN292_HUMAN	Zinc finger protein 292	24	43	2.9	0.0684	Ambiguous	Nucleus		288.28		D.C.	369
K1C18_HUMAN	Keratin, type I cytoskeletal 18 (Cell proliferation-inducing gene 46 protein) (Cytokeratin-18) (CK-18) (Keratin-18) (K18)	7.2	40	22000	566	Ambiguous	Both		48.057		D.C.	730
SUMO1_HUMAN	Small ubiquitin-related modifier 1 (SUMO-1) (GAP-modifying protein 1) (GMP1) (SMT3 homolog 3) (Sentrin) (Ubiquitin-homology domain protein PIC1) (Ubiquitin-like protein SMT3C) (Smt3C) (Ubiquitin-like protein UBL1)	5.6	40	940	23.5	Ambiguous	Both		11.557		D.C.	1712
HLX_HUMAN	H2.0-like homeobox protein (Homeobox protein HB24) (Homeobox protein HLX1)	37	33	4.5	0.136	Ambiguous	Nucleus		50.789		D.C.	2141
CUL7_HUMAN	Cullin-7 (CUL-7)	23	30	2.8	0.0937	Ambiguous	Cytoplasm		191.16		D.C.	2155
HUTH_HUMAN	Histidine ammonia-lyase (Histidase) (EC 4.3.1.3)	0.97	29	1.3	0.0437	Ambiguous			64.887		D.C.	1287
FABP5_HUMAN	Fatty acid-binding protein, epidermal (Epidermal-type fatty acid-binding protein) (E-FABP) (Fatty acid-binding protein 5) (Psoriasis-associated fatty acid-binding protein homolog) (PA-FABP)	1.9	28	120	4.26	Ambiguous	Cytoplasm		15.164		D.C.	1806
NOL7_HUMAN	Nucleolar protein 7 (Nucleolar protein of 27 kDa)	48	25	5.9	0.239	Ambiguous	Nucleus		29.426		D.C.	4539
ATLA3_HUMAN	Atlastin-3 (EC 3.6.5.-)	47	25	5.7	0.232	Ambiguous	Cytoplasm		60.541	TM	D.C.	2538
CXXC1_HUMAN	CXXC-type zinc finger protein 1 (CpG-binding protein) (PHD finger and CXXC domain-containing protein 1)	18	25	2.2	0.089	Ambiguous	Nucleus		75.711		D.C.	4321
RL13_HUMAN	60S ribosomal protein L13 (Breast basic conserved protein 1)	31	24	3.7	0.157	Ambiguous			24.261		D.C.	1052
RGPA1_HUMAN	Ral GTPase-activating protein subunit alpha-1 (GAP-related-interacting partner to E12) (GRIPE) (GTPase-activating Rap/Ran-GAP domain-like 1) (Tuberin-like protein 1) (p240)	29	24	3.6	0.149	Ambiguous	Both		229.83		D.C.	2546
ATPA_HUMAN	ATP synthase subunit alpha, mitochondrial	22	24	2.2	0.0894	Ambiguous	Cytoplasm		54.493	MT	D.C.	1039
TITIN_HUMAN	Titin (EC 2.7.11.1) (Connectin) (Rhabdomyosarcoma antigen MU-RMS-40.14)	8.8	23	7.4	0.323	Ambiguous	Both		3653		D.C.	3215
RUBIC_HUMAN	Run domain Beclin-1 interacting and cysteine-rich containing protein (Rubicon) (Beclin-1 associated RUN domain containing protein) (Baron)	49	23	6	0.258	Ambiguous	Cytoplasm		102.5		D.C.	3245
AKA11_HUMAN	A-kinase anchor protein 11 (AKAP-11) (A-kinase anchor protein 220 kDa) (AKAP 220) (hAKAP220) (Protein kinase A-anchoring protein 11) (PRKA11)	33	22	4.1	0.185	Ambiguous	Cytoplasm		210.51		D.C.	4482
FBF1_HUMAN	Fas-binding factor 1 (FBF-1) (Protein albatross)	7.8	22	0.95	0.0437	Ambiguous	Cytoplasm		98.642		D.C.	3142
CDSN_HUMAN	Corneodesmosin (S protein)	2.2	21	23	1.1	Ambiguous	Other		51.522	ER	D.C.	2233
SNUT1_HUMAN	U4/U6.U5 tri-snRNP-associated protein 1 (SNU66 homolog) (hSnu66) (Squamous cell carcinoma antigen recognized by T-cells 1) (SART-1) (hSART-1) (U4/U6.U5 tri-snRNP-associated 110 kDa protein) (allergen Hom s 1)	7.6	21	0.93	0.0437	Ambiguous	Nucleus		90.254		D.C.	296
ZY11A_HUMAN	Protein zyg-11 homolog A	7.6	21	0.93	0.0437	Ambiguous			85.807		D.C.	2639
AN13D_HUMAN	Ankyrin repeat domain-containing protein 13D	7.5	21	0.92	0.0437	Ambiguous	Cytoplasm		68.171		D.C.	2659
PTN13_HUMAN	Tyrosine-protein phosphatase non-receptor type 13 (EC 3.1.3.48) (Fas-associated protein-tyrosine phosphatase 1) (FAP-1) (PTP-BAS) (Protein-tyrosine phosphatase 1E) (PTP-E1) (hPTPE1) (Protein-tyrosine phosphatase PTPL1)	7.6	21	0.92	0.0437	Ambiguous	Both		274.93		D.C.	1936
WDR83_HUMAN	WD repeat domain-containing protein 83 (Mitogen-activated protein kinase organizer 1) (MAPK organizer 1)	7.5	21	0.91	0.0437	Ambiguous	Both		34.342		D.C.	3684
LARP4_HUMAN	La-related protein 4 (La ribonucleoprotein domain family member 4)	7.3	21	0.9	0.0437	Ambiguous			49.951		D.C.	2680
EST1A_HUMAN	Telomerase-binding protein EST1A (EC 3.1.-.-) (EST1-like protein A) (Ever shorter telomeres 1A) (Smg-6 homolog) (Telomerase subunit EST1A) (hSmg5/7a)	37	20	4.5	0.221	Ambiguous	Both		160.46		D.C.	2794
RFWD2_HUMAN	E3 ubiquitin-protein ligase RFWD2 (EC 6.3.2.-) (Constitutive photomorphogenesis protein 1 homolog) (hCOP1) (RING finger and WD repeat domain protein 2) (RING finger protein 200)	7.2	20	0.88	0.0437	Ambiguous	Both	NESdbO	57.526		D.C.	3082
ZA2G_HUMAN	Zinc-alpha-2-glycoprotein (Zn-alpha-2-GP) (Zn-alpha-2-glycoprotein)	8.1	19	35	1.86	Ambiguous	Other		34.258	ER	D.C.	1034
CBP_HUMAN	CREB-binding protein (EC 2.3.1.48)	15	19	1.8	0.094	Ambiguous	Both		265.35		D.C.	3256
CARD6_HUMAN	Caspase recruitment domain-containing protein 6	7	19	0.85	0.0437	Ambiguous			116.47		D.C.	3773
TARA_HUMAN	TRIO and F-actin-binding protein (Protein Tara) (Trio-associated repeat on actin)	6.9	19	0.84	0.0437	Ambiguous	Both		243.07		D.C.	3901
RRP15_HUMAN	RRP15-like protein (Ribosomal RNA-processing protein 15)	6.8	19	0.83	0.0437	Ambiguous			31.484		D.C.	4668
CALL5_HUMAN	Calmodulin-like protein 5 (Calmodulin-like skin protein)	1.8	18	39	2.18	Ambiguous			15.892		D.C.	4310
RGL3_HUMAN	Ral guanine nucleotide dissociation stimulator-like 3 (RalGDS-like 3)	12	18	1.5	0.0835	Ambiguous			78.078		D.C.	2349
EAF6_HUMAN	Chromatin modification-related protein MEAF6 (MYST/Esa1-associated factor 6) (Esa1-associated factor 6 homolog) (Protein EAF6 homolog) (hEAF6) (Sarcoma antigen NY-SAR-91)	6.5	18	0.8	0.0437	Ambiguous	Nucleus		21.624		D.C.	4025
TULP4_HUMAN	Tubby-related protein 4 (Tubby superfamily protein) (Tubby-like protein 4)	6.6	18	0.8	0.0437	Ambiguous	Cytoplasm		169		D.C.	4135
ZCH18_HUMAN	Zinc finger CCCH domain-containing protein 18 (Nuclear protein NHN1)	6.5	18	0.8	0.0437	Ambiguous	Nucleus		84.099		D.C.	2808
PKHG1_HUMAN	Pleckstrin homology domain-containing family G member 1	6.4	18	0.79	0.0437	Ambiguous			155.44		D.C.	4521
WASF1_HUMAN	Wiskott-Aldrich syndrome protein family member 1 (WASP family protein member 1) (Protein WAVE-1) (Verprolin homology domain-containing protein 1)	49	17	6	0.354	Ambiguous	Cytoplasm		61.651		D.C.	3227
NCOR2_HUMAN	Nuclear receptor corepressor 2 (N-CoR2) (CTG repeat protein 26) (SMAP270) (Silencing mediator of retinoic acid and thyroid hormone receptor) (SMRT) (T3 receptor-associating factor) (TRAC) (Thyroid-, retinoic-acid-receptor-associated corepressor)	39	17	4.8	0.278	Ambiguous	Nucleus		268.36		D.C.	4773
STAU2_HUMAN	Double-stranded RNA-binding protein Staufen homolog 2	6.2	17	0.75	0.0437	Ambiguous	Both	NESdbO	34.357		D.C.	4176
H12_HUMAN	Histone H1.2 (Histone H1c) (Histone H1d) (Histone H1s-1)	2.2	16	27	1.72	Ambiguous	Nucleus		21.364		D.C.	826
PKHG4_HUMAN	Puratrophin-1 (Pleckstrin homology domain-containing family G member 4) (PH domain-containing family G member 4) (Purkinje cell atrophy-associated protein 1)	48	16	5.9	0.374	Ambiguous			122.89		D.C.	2395
PRP18_HUMAN	Pre-mRNA-splicing factor 18 (PRP18 homolog) (hPRP18)	46	16	5.6	0.345	Ambiguous	Nucleus		39.859		D.C.	3611
TBL3_HUMAN	Transducin beta-like protein 3 (WD repeat-containing protein SAZD)	5.9	16	0.72	0.0437	Ambiguous	Nucleus		89.034		D.C.	1921
TRM44_HUMAN	Probable tRNA (uracil-O(2)-)-methyltransferase (EC 2.1.1.211) (Methyltransferase-like protein 19)	5.6	16	0.69	0.0437	Ambiguous	Cytoplasm		84.628		D.C.	2926
MAP7_HUMAN	Ensconsin (Epithelial microtubule-associated protein of 115 kDa) (E-MAP-115) (Microtubule-associated protein 7) (MAP-7)	27	15	780	53.9	Ambiguous	Cytoplasm		84.051		D.C.	2098
PLAK_HUMAN	Junction plakoglobin (Catenin gamma) (Desmoplakin III) (Desmoplakin-3)	2.2	15	120	8.51	Ambiguous	Cytoplasm		81.744		D.C.	895
FBX42_HUMAN	F-box only protein 42 (Just one F-box and Kelch domain-containing protein)	29	15	3.6	0.238	Ambiguous			77.838		D.C.	2584
CCNF_HUMAN	Cyclin-F (F-box only protein 1)	13	15	1.6	0.107	Ambiguous	Both		87.639		D.C.	1259
DDX55_HUMAN	ATP-dependent RNA helicase DDX55 (EC 3.6.4.13) (DEAD box protein 55)	5.3	15	0.65	0.0437	Ambiguous			68.546		D.C.	3080
ECT2_HUMAN	Protein ECT2 (Epithelial cell-transforming sequence 2 oncogene)	5.3	15	0.65	0.0437	Ambiguous	Both		99.92		D.C.	3994
FREM2_HUMAN	FRAS1-related extracellular matrix protein 2 (ECM3 homolog)	5.3	15	0.65	0.0437	Ambiguous	Cytoplasm		295.84	TM;ER	D.C.	2438
ECM1_HUMAN	Extracellular matrix protein 1 (Secretory component p85)	0.38	15	0.64	0.0437	Ambiguous	Other		46.099	ER	D.C.	2289
CATIN_HUMAN	Cactin (Renal carcinoma antigen NY-REN-24)	5.2	15	0.63	0.0437	Ambiguous	Nucleus		88.701		D.C.	3172
RA54B_HUMAN	DNA repair and recombination protein RAD54B (EC 3.6.4.-) (RAD54 homolog B)	36	14	4.4	0.314	Ambiguous	Nucleus		102.97		D.C.	4774
CAF1B_HUMAN	Chromatin assembly factor 1 subunit B (CAF-1 subunit B) (Chromatin assembly factor I p60 subunit) (CAF-I 60 kDa subunit) (CAF-I p60) (M-phase phosphoprotein 7)	31	14	3.8	0.28	Ambiguous	Both		61.492		D.C.	1961
FANCB_HUMAN	Fanconi anemia group B protein (Protein FACB) (Fanconi anemia-associated polypeptide of 95 kDa) (FAAP95)	28	14	3.4	0.237	Ambiguous	Nucleus		97.725		D.C.	3028
F208B_HUMAN	Protein FAM208B	8.6	14	1	0.0762	Ambiguous			268.84		D.C.	2495
PTN3_HUMAN	Tyrosine-protein phosphatase non-receptor type 3 (EC 3.1.3.48) (Protein-tyrosine phosphatase H1) (PTP-H1)	5	14	0.62	0.0437	Ambiguous	Cytoplasm		103.99		D.C.	1047
SIR5_HUMAN	NAD-dependent protein deacylase sirtuin-5, mitochondrial (EC 3.5.1.-) (Regulatory protein SIR2 homolog 5) (SIR2-like protein 5)	16	13	170	13.8	Ambiguous	Both		33.881	MT	D.C.	4248
ARGI1_HUMAN	Arginase-1 (EC 3.5.3.1) (Liver-type arginase) (Type I arginase)	2.6	13	24	1.9	Ambiguous	Cytoplasm		34.735		D.C.	717
HEAT1_HUMAN	HEAT repeat-containing protein 1 (Protein BAP28) [Cleaved into: HEAT repeat-containing protein 1, N-terminally processed]	4.7	13	0.58	0.0437	Ambiguous	Nucleus		242.37		D.C.	3946
ESYT1_HUMAN	Extended synaptotagmin-1 (E-Syt1) (Membrane-bound C2 domain-containing protein)	4.5	13	0.55	0.0437	Ambiguous	Cytoplasm		122.85	TM	D.C.	3692
DSC1_HUMAN	Desmocollin-1 (Cadherin family member 1) (Desmosomal glycoprotein 2/3) (DG2/DG3)	3.8	12	69	5.92	Ambiguous	Cytoplasm		93.834	TM;ER	D.C.	1892
PKP1_HUMAN	Plakophilin-1 (Band 6 protein) (B6P)	4.2	12	10	0.856	Ambiguous	Both		80.496		D.C.	2055
TDRD9_HUMAN	Putative ATP-dependent RNA helicase TDRD9 (EC 3.6.4.13) (Tudor domain-containing protein 9)	42	12	5.1	0.438	Ambiguous	Both		155.68		D.C.	3050
ARMC5_HUMAN	Armadillo repeat-containing protein 5	20	12	2.5	0.211	Ambiguous			81.368		D.C.	3358
RNF12_HUMAN	E3 ubiquitin-protein ligase RLIM (EC 6.3.2.-) (LIM domain-interacting RING finger protein) (RING finger LIM domain-binding protein) (R-LIM) (RING finger protein 12) (Renal carcinoma antigen NY-REN-43)	4.4	12	0.54	0.0437	Ambiguous	Nucleus		68.548		D.C.	4208
TGM5_HUMAN	Protein-glutamine gamma-glutamyltransferase 5 (EC 2.3.2.13) (Transglutaminase X) (TG(X)) (TGX) (TGase X) (Transglutaminase-5) (TGase-5)	4.3	12	0.53	0.0437	Ambiguous	Cytoplasm		71.918		D.C.	325
PEAK1_HUMAN	Pseudopodium-enriched atypical kinase 1 (EC 2.7.10.2) (Sugen kinase 269) (Tyrosine-protein kinase SgK269)	4.3	12	0.52	0.0437	Ambiguous	Cytoplasm		193.1		D.C.	3974
PKHM1_HUMAN	Pleckstrin homology domain-containing family M member 1 (PH domain-containing family M member 1) (162 kDa adapter protein) (AP162)	4.1	12	0.5	0.0437	Ambiguous	Cytoplasm		117.44		D.C.	4710
H2A1J_HUMAN	Histone H2A type 1-J (Histone H2A/e)	5.2	11	2200	201	Ambiguous	Nucleus		13.936		D.C.	811
FBX50_HUMAN	F-box only protein 50 (NCC receptor protein 1 homolog) (NCCRP-1) (Non-specific cytotoxic cell receptor protein 1 homolog)	3.5	11	19	1.7	Ambiguous	Cytoplasm		30.847		D.C.	2666
ANM9_HUMAN	Putative protein arginine N-methyltransferase 9 (Putative protein arginine N-methyltransferase 10) (EC 2.1.1.-)	46	11	5.6	0.488	Ambiguous		Thakar&Karaca	81.856		D.C.	2580
IGHA1_HUMAN	Ig alpha-1 chain C region	17	11	2.1	0.189	Ambiguous			37.654		D.C.	690
ATR_HUMAN	Serine/threonine-protein kinase ATR (EC 2.7.11.1) (Ataxia telangiectasia and Rad3-related protein) (FRAP-related protein 1)	8.4	11	1	0.0916	Ambiguous	Nucleus		294.22		D.C.	2023
CNTLN_HUMAN	Centlein (Centrosomal protein)	3.8	11	0.47	0.0437	Ambiguous	Cytoplasm		161.6		D.C.	4252
CPNE7_HUMAN	Copine-7 (Copine VII)	3.8	11	0.47	0.0437	Ambiguous			61.932		D.C.	4376
CQ085_HUMAN	Uncharacterized protein C17orf85 (Protein ELG)	3.8	11	0.47	0.0437	Ambiguous			38.92		D.C.	2374
KRIT1_HUMAN	Krev interaction trapped protein 1 (Krev interaction trapped 1) (Cerebral cavernous malformations 1 protein)	3.9	11	0.47	0.0437	Ambiguous	Cytoplasm		60.944		D.C.	161
KPRP_HUMAN	Keratinocyte proline-rich protein (hKPRP)	3.9	10	130	12.5	Ambiguous	Cytoplasm		64.135		D.C.	2455
CYTA_HUMAN	Cystatin-A (Cystatin-AS) (Stefin-A) [Cleaved into: Cystatin-A, N-terminally processed]	2	10	78	7.75	Ambiguous	Cytoplasm		11.006		D.C.	686
ZER1_HUMAN	Protein zer-1 homolog (Hzyg) (Zyg-11 homolog B-like protein)	44	10	5.4	0.531	Ambiguous			88.169		D.C.	2772
CE152_HUMAN	Centrosomal protein of 152 kDa (Cep152)	13	10	1.6	0.159	Ambiguous	Cytoplasm		189.07		D.C.	567
D11L8_HUMAN	Putative ATP-dependent RNA helicase DDX11-like protein 8 (EC 3.6.4.13) (DEAD/H box protein 11-like 8)	9.3	10	1.1	0.112	Ambiguous	Nucleus		101.81		D.C.	38
GCP6_HUMAN	Gamma-tubulin complex component 6 (GCP-6)	3.7	10	0.45	0.0437	Ambiguous	Cytoplasm		196.76		D.C.	3561
KIF2C_HUMAN	Kinesin-like protein KIF2C (Kinesin-like protein 6) (Mitotic centromere-associated kinesin) (MCAK)	3.5	9.8	0.43	0.0437	Ambiguous	Both		75.561		D.C.	3614
WAPL_HUMAN	Wings apart-like protein homolog (Friend of EBNA2 protein)	35	9.7	4.3	0.446	Ambiguous	Both		132.94		D.C.	2747
CENPF_HUMAN	Centromere protein F (CENP-F) (AH antigen) (Kinetochore protein CENPF) (Mitosin)	16	9.7	2	0.207	Ambiguous	Both		367.76		D.C.	1386
ICE1_HUMAN	Little elongation complex subunit 1 (Interactor of little elongator complex ELL subunit 1)	3.4	9.6	0.42	0.0437	Ambiguous	Nucleus		247.89		D.C.	4615
DSG1_HUMAN	Desmoglein-1 (Cadherin family member 4) (Desmosomal glycoprotein 1) (DG1) (DGI) (Pemphigus foliaceus antigen)	3.1	9.5	63	6.64	Ambiguous	Cytoplasm		113.75	TM;ER	D.C.	1819
AGO2_HUMAN	Protein argonaute-2 (Argonaute2) (hAgo2) (EC 3.1.26.n2) (Argonaute RISC catalytic component 2) (Eukaryotic translation initiation factor 2C 2) (eIF-2C 2) (eIF2C 2) (PAZ Piwi domain protein) (PPD) (Protein slicer)	6.4	9.5	55	5.84	Ambiguous	Both		97.207		D.C.	4500
ABCA4_HUMAN	Retinal-specific ATP-binding cassette transporter (ATP-binding cassette sub-family A member 4) (RIM ABC transporter) (RIM protein) (RmP) (Stargardt disease protein)	3.4	9.5	0.42	0.0437	Ambiguous	Cytoplasm		255.94	TM	D.C.	1749
NEC1_HUMAN	Neuroendocrine convertase 1 (NEC 1) (EC 3.4.21.93) (Prohormone convertase 1) (Proprotein convertase 1) (PC1)	3.4	9.5	0.42	0.0437	Ambiguous	Cytoplasm		79.009	ER	D.C.	1089
SKA1_HUMAN	Spindle and kinetochore-associated protein 1	34	9.4	4.1	0.442	Ambiguous	Cytoplasm		29.484		D.C.	3346
HBB_HUMAN	Hemoglobin subunit beta (Beta-globin) (Hemoglobin beta chain) [Cleaved into: LVV-hemorphin-7; Spinorphin]	2.6	9.3	1.9	0.203	Ambiguous			15.998		D.C.	1738
IF172_HUMAN	Intraflagellar transport protein 172 homolog	3.3	9.1	0.4	0.0437	Ambiguous	Cytoplasm		172.44		D.C.	4403
IFIT5_HUMAN	Interferon-induced protein with tetratricopeptide repeats 5 (IFIT-5) (Interferon-induced 58 kDa protein) (Retinoic acid- and interferon-inducible 58 kDa protein) (P58)	3.3	9.1	0.4	0.0437	Ambiguous	Cytoplasm		55.846		D.C.	1992
DDX20_HUMAN	Probable ATP-dependent RNA helicase DDX20 (EC 3.6.4.13) (Component of gems 3) (DEAD box protein 20) (DEAD box protein DP 103) (Gemin-3)	23	9	2.8	0.311	Ambiguous	Both	Thakar&Karaca	92.239		D.C.	4420
GRK5_HUMAN	G protein-coupled receptor kinase 5 (EC 2.7.11.16) (G protein-coupled receptor kinase GRK5)	8.2	9	1	0.112	Ambiguous	Both		67.786		D.C.	1178
ARHG4_HUMAN	Rho guanine nucleotide exchange factor 4 (APC-stimulated guanine nucleotide exchange factor 1) (Asef) (Asef1)	29	8.8	3.5	0.4	Ambiguous	Cytoplasm		76.419		D.C.	4121
NEST_HUMAN	Nestin	3.1	8.7	0.38	0.0437	Ambiguous			177.44		D.C.	1362
NCOA1_HUMAN	Nuclear receptor coactivator 1 (NCoA-1) (EC 2.3.1.48) (Class E basic helix-loop-helix protein 74) (bHLHe74) (Protein Hin-2) (RIP160) (Renal carcinoma antigen NY-REN-52) (Steroid receptor coactivator 1) (SRC-1)	38	8.5	4.6	0.543	Ambiguous	Nucleus		152.38		D.C.	2258
TGM1_HUMAN	Protein-glutamine gamma-glutamyltransferase K (EC 2.3.2.13) (Epidermal TGase) (Transglutaminase K) (TG(K)) (TGK) (TGase K) (Transglutaminase-1) (TGase-1)	0.71	8.5	2.5	0.3	Ambiguous	Cytoplasm		89.786		D.C.	1003
WDR75_HUMAN	WD repeat-containing protein 75	3	8.5	0.37	0.0437	Ambiguous	Nucleus		94.498		D.C.	2881
DEN6A_HUMAN	Protein DENND6A (DENN domain-containing protein 6A)	14	8.3	1.8	0.212	Ambiguous	Cytoplasm		69.574		D.C.	2885
CHD2_HUMAN	Chromodomain-helicase-DNA-binding protein 2 (CHD-2) (EC 3.6.4.12) (ATP-dependent helicase CHD2)	3	8.3	0.36	0.0437	Ambiguous	Nucleus		200.56		D.C.	188
RECQ4_HUMAN	ATP-dependent DNA helicase Q4 (EC 3.6.4.12) (DNA helicase, RecQ-like type 4) (RecQ4) (RTS) (RecQ protein-like 4)	17	8.2	2	0.246	Ambiguous	Both		133.08		D.C.	534
DYST_HUMAN	Dystonin (230 kDa bullous pemphigoid antigen) (230/240 kDa bullous pemphigoid antigen) (Bullous pemphigoid antigen 1) (BPA) (Bullous pemphigoid antigen) (Dystonia musculorum protein) (Hemidesmosomal plaque protein)	4.7	8.2	0.57	0.0694	Ambiguous	Both		860.65		D.C.	1828
CASPE_HUMAN	Caspase-14 (CASP-14) (EC 3.4.22.-) [Cleaved into: Caspase-14 subunit p19; Caspase-14 subunit p10]	3.2	8.1	21	2.62	Ambiguous	Both		27.679		D.C.	1148
RAGP1_HUMAN	Ran GTPase-activating protein 1 (RanGAP1)	8.7	8	1100	140	Ambiguous	Both		63.541		D.C.	1316
RNF34_HUMAN	E3 ubiquitin-protein ligase RNF34 (EC 6.3.2.-) (Caspase regulator CARP1) (Caspases-8 and -10-associated RING finger protein 1) (CARP-1) (FYVE-RING finger protein Momo) (Human RING finger homologous to inhibitor of apoptosis protein) (hRFI) (RING finger protein 34) (RING finger protein RIFF)	43	8	5.2	0.652	Ambiguous	Both		41.64		D.C.	3306
TGM3_HUMAN	Protein-glutamine gamma-glutamyltransferase E (EC 2.3.2.13) (Transglutaminase E) (TG(E)) (TGE) (TGase E) (Transglutaminase-3) (TGase-3) [Cleaved into: Protein-glutamine gamma-glutamyltransferase E 50 kDa catalytic chain; Protein-glutamine gamma-glutamyltransferase E 27 kDa non-catalytic chain]	1.3	7.9	9	1.13	Ambiguous			76.631		D.C.	1885
DCNL4_HUMAN	DCN1-like protein 4 (DCUN1 domain-containing protein 4) (Defective in cullin neddylation protein 1-like protein 4)	37	7.9	4.5	0.575	Ambiguous			34.067		D.C.	3229
SLFN5_HUMAN	Schlafen family member 5	36	7.9	4.4	0.554	Ambiguous			101.05		D.C.	1898
NPHP4_HUMAN	Nephrocystin-4 (Nephroretinin)	2.8	7.9	0.34	0.0437	Ambiguous	Cytoplasm		99.952		D.C.	453
MTUS1_HUMAN	Microtubule-associated tumor suppressor 1 (AT2 receptor-binding protein) (Angiotensin-II type 2 receptor-interacting protein) (Mitochondrial tumor suppressor 1)	19	7.7	2.3	0.303	Ambiguous	Both		135.66		D.C.	4512
ZFY26_HUMAN	Zinc finger FYVE domain-containing protein 26 (FYVE domain-containing centrosomal protein) (FYVE-CENT) (Spastizin)	13	7.7	1.6	0.21	Ambiguous	Cytoplasm		282.5		D.C.	2528
ATX2_HUMAN	Ataxin-2 (Spinocerebellar ataxia type 2 protein) (Trinucleotide repeat-containing gene 13 protein)	7.2	7.7	0.88	0.114	Ambiguous	Cytoplasm		106.05		D.C.	3617
AP5B1_HUMAN	AP-5 complex subunit beta-1 (Adaptor-related protein complex 5 beta subunit) (Beta5)	6.4	7.6	0.78	0.102	Ambiguous			93.948		D.C.	2333
RPA2_HUMAN	DNA-directed RNA polymerase I subunit RPA2 (RNA polymerase I subunit 2) (EC 2.7.7.6) (DNA-directed RNA polymerase I 135 kDa polypeptide) (RPA135)	32	7.2	3.9	0.545	Ambiguous	Nucleus		128.23		D.C.	4019
TFR1_HUMAN	Transferrin receptor protein 1 (TR) (TfR) (TfR1) (Trfr) (T9) (p90) (CD antigen CD71) [Cleaved into: Transferrin receptor protein 1, serum form (sTfR)]	13	6.9	1.6	0.236	Ambiguous	Cytoplasm		84.87	TM	D.C.	693
SCAFB_HUMAN	Protein SCAF11 (CTD-associated SR protein 11) (Renal carcinoma antigen NY-REN-40) (SC35-interacting protein 1) (SR-related and CTD-associated factor 11) (SRSF2-interacting protein) (Serine/arginine-rich splicing factor 2-interacting protein) (Splicing factor, arginine/serine-rich 2-interacting protein) (Splicing regulatory protein 129) (SRrp129)	2.4	6.7	0.29	0.0437	Ambiguous	Nucleus		128.87		D.C.	3603
CTC1_HUMAN	CST complex subunit CTC1 (Conserved telomere maintenance component 1) (HBV DNAPTP1-transactivated protein B)	37	6.5	4.5	0.699	Ambiguous	Both		134.61		D.C.	2321
SPAT7_HUMAN	Spermatogenesis-associated protein 7 (HSD-3.1) (Spermatogenesis-associated protein HSD3)	2.3	6.5	0.28	0.0437	Ambiguous			51.93		D.C.	4327
SUZ12_HUMAN	Polycomb protein SUZ12 (Chromatin precipitated E2F target 9 protein) (ChET 9 protein) (Joined to JAZF1 protein) (Suppressor of zeste 12 protein homolog)	45	6.4	5.5	0.85	Ambiguous	Nucleus		83.054		D.C.	2169
SCAF8_HUMAN	Protein SCAF8 (CDC5L complex-associated protein 7) (RNA-binding motif protein 16) (SR-related and CTD-associated factor 8)	34	6.4	4.2	0.653	Ambiguous	Nucleus		140.52		D.C.	4564
PI4KA_HUMAN	Phosphatidylinositol 4-kinase alpha (PI4-kinase alpha) (PI4K-alpha) (PtdIns-4-kinase alpha) (EC 2.7.1.67)	2.3	6.4	0.28	0.0437	Ambiguous	Cytoplasm		231.32		D.C.	1286
ESRP2_HUMAN	Epithelial splicing regulatory protein 2 (RNA-binding motif protein 35B) (RNA-binding protein 35B)	42	6.2	5.2	0.83	Ambiguous	Nucleus		77.363		D.C.	3963
TUT4_HUMAN	Terminal uridylyltransferase 4 (TUTase 4) (EC 2.7.7.52) (Zinc finger CCHC domain-containing protein 11)	21	6.1	2.5	0.42	Ambiguous	Both		81.14		D.C.	2466
AKIB1_HUMAN	Ankyrin repeat and IBR domain-containing protein 1	2.2	6.1	0.27	0.0437	Ambiguous			122		D.C.	4350
TBB5_HUMAN	Tubulin beta chain (Tubulin beta-5 chain)	36	6	35000	5820	Ambiguous	Cytoplasm	BioGrid	49.67		D.C.	759
K22E_HUMAN	Keratin, type II cytoskeletal 2 epidermal (Cytokeratin-2e) (CK-2e) (Epithelial keratin-2e) (Keratin-2 epidermis) (Keratin-2e) (K2e) (Type-II keratin Kb2)	2.6	5.9	16000	2740	Ambiguous			65.432		D.C.	1208
ALKB5_HUMAN	RNA demethylase ALKBH5 (EC 1.14.11.-) (Alkylated DNA repair protein alkB homolog 5) (Alpha-ketoglutarate-dependent dioxygenase alkB homolog 5)	11	5.9	1.3	0.222	Ambiguous	Nucleus		44.255		D.C.	2590
BPTF_HUMAN	Nucleosome-remodeling factor subunit BPTF (Bromodomain and PHD finger-containing transcription factor) (Fetal Alz-50 clone 1 protein) (Fetal Alzheimer antigen)	1.8	5.8	2.8	0.478	Ambiguous	Both		322.21		D.C.	1925
U3IP2_HUMAN	U3 small nucleolar RNA-interacting protein 2 (RRP9 homolog) (U3 small nucleolar ribonucleoprotein-associated 55 kDa protein) (U3 snoRNP-associated 55 kDa protein) (U3-55K)	36	5.7	4.4	0.779	Ambiguous	Nucleus	Thakar&Karaca	51.84		D.C.	352
CPT1A_HUMAN	Carnitine O-palmitoyltransferase 1, liver isoform (CPT1-L) (EC 2.3.1.21) (Carnitine O-palmitoyltransferase I, liver isoform) (CPT I) (CPTI-L) (Carnitine palmitoyltransferase 1A)	2	5.6	0.25	0.0437	Ambiguous	Cytoplasm		86.238	TM	D.C.	1420
MK04_HUMAN	Mitogen-activated protein kinase 4 (MAP kinase 4) (MAPK 4) (EC 2.7.11.24) (Extracellular signal-regulated kinase 4) (ERK-4) (MAP kinase isoform p63) (p63-MAPK)	31	5.5	3.7	0.674	Ambiguous	Both		65.921		D.C.	1136
CYH1_HUMAN	Cytohesin-1 (PH, SEC7 and coiled-coil domain-containing protein 1) (SEC7 homolog B2-1)	12	5.5	1.5	0.275	Ambiguous	Cytoplasm		46.355		D.C.	2229
FIGL1_HUMAN	Fidgetin-like protein 1 (EC 3.6.4.-)	33	5.4	4	0.74	Ambiguous	Nucleus		61.686		D.C.	2609
GTF2I_HUMAN	General transcription factor II-I (GTFII-I) (TFII-I) (Bruton tyrosine kinase-associated protein 135) (BAP-135) (BTK-associated protein 135) (SRF-Phox1-interacting protein) (SPIN) (Williams-Beuren syndrome chromosomal region 6 protein)	13	5.3	30	5.7	Ambiguous	Both		107.97		D.C.	1747
GIT2_HUMAN	ARF GTPase-activating protein GIT2 (ARF GAP GIT2) (Cool-interacting tyrosine-phosphorylated protein 2) (CAT-2) (CAT2) (G protein-coupled receptor kinase-interactor 2) (GRK-interacting protein 2)	38	5.3	4.7	0.891	Ambiguous			84.542		D.C.	2086
DMPK_HUMAN	Myotonin-protein kinase (MT-PK) (EC 2.7.11.1) (DM-kinase) (DMK) (DM1 protein kinase) (DMPK) (Myotonic dystrophy protein kinase)	27	5.3	3.4	0.63	Ambiguous	Both		59.446	TM	D.C.	1901
AGO1_HUMAN	Protein argonaute-1 (Argonaute1) (hAgo1) (Argonaute RISC catalytic component 1) (Eukaryotic translation initiation factor 2C 1) (eIF-2C 1) (eIF2C 1) (Putative RNA-binding protein Q99)	4	5.3	0.49	0.0928	Ambiguous	Cytoplasm		97.213		D.C.	4504
SETX_HUMAN	Probable helicase senataxin (EC 3.6.4.-) (Amyotrophic lateral sclerosis 4 protein) (SEN1 homolog)	5.2	5.2	0.63	0.122	Ambiguous	Both		299.42		D.C.	2722
WDR36_HUMAN	WD repeat-containing protein 36 (T-cell activation WD repeat-containing protein) (TA-WDRP)	8.1	5.1	0.99	0.196	Ambiguous	Nucleus		105.32		D.C.	3085
PPT1_HUMAN	Palmitoyl-protein thioesterase 1 (PPT-1) (EC 3.1.2.22) (Palmitoyl-protein hydrolase 1)	34	4.9	4.1	0.83	Ambiguous	Cytoplasm		23.093	ER	D.C.	1441
TP4AP_HUMAN	Short transient receptor potential channel 4-associated protein (Trp4-associated protein) (Trpc4-associated protein) (Protein TAP1) (TNF-receptor ubiquitous scaffolding/signaling protein) (Protein TRUSS)	22	4.9	2.7	0.541	Ambiguous			90.042		D.C.	3138
PRP6_HUMAN	Pre-mRNA-processing factor 6 (Androgen receptor N-terminal domain-transactivating protein 1) (ANT-1) (PRP6 homolog) (U5 snRNP-associated 102 kDa protein) (U5-102 kDa protein)	9.8	4.9	1.2	0.243	Ambiguous	Nucleus		102.43		D.C.	552
CRBG3_HUMAN	Very large A-kinase anchor protein (vlAKAP) (Beta/gamma crystallin domain-containing protein 3)	49	4.8	6	1.25	Ambiguous			116.2		D.C.	2529
DSC3_HUMAN	Desmocollin-3 (Cadherin family member 3) (Desmocollin-4) (HT-CP)	1.3	4.8	0.22	0.0466	Ambiguous	Cytoplasm		93.453	TM;ER	D.C.	2115
MOV10_HUMAN	Putative helicase MOV-10 (EC 3.6.4.13) (Moloney leukemia virus 10 protein)	44	4.7	5.4	1.14	Ambiguous	Cytoplasm		113.67		D.C.	4056
FYV1_HUMAN	1-phosphatidylinositol 3-phosphate 5-kinase (Phosphatidylinositol 3-phosphate 5-kinase) (EC 2.7.1.150) (FYVE finger-containing phosphoinositide kinase) (PIKfyve) (Phosphatidylinositol 3-phosphate 5-kinase type III) (PIPkin-III) (Type III PIP kinase)	44	4.6	6.8	1.47	Ambiguous	Cytoplasm		237.13		D.C.	4622
LRC41_HUMAN	Leucine-rich repeat-containing protein 41 (Protein Muf1)	41	4.6	5	1.09	Ambiguous			79.297		D.C.	2210
KANL2_HUMAN	KAT8 regulatory NSL complex subunit 2 (NSL complex protein NSL2) (Non-specific lethal 2 homolog)	17	4.6	2.1	0.457	Ambiguous	Nucleus		55.042		D.C.	4014
ANR32_HUMAN	Ankyrin repeat domain-containing protein 32 (BRCT domain-containing protein 1)	11	4.6	1.4	0.297	Ambiguous			121.05		D.C.	3658
CT2NL_HUMAN	CTTNBP2 N-terminal-like protein	37	4.5	4.5	1.01	Ambiguous	Cytoplasm	Thakar&Karaca	70.157		D.C.	4346
R3HC1_HUMAN	R3H and coiled-coil domain-containing protein 1	35	4.5	4.2	0.945	Ambiguous			53.259		D.C.	4687
F208A_HUMAN	Protein FAM208A (CTCL tumor antigen se89-1) (Retinoblastoma-associated protein RAP140)	20	4.5	2.5	0.555	Ambiguous			170.81		D.C.	4477
PER2_HUMAN	Period circadian protein homolog 2 (hPER2) (Circadian clock protein PERIOD 2)	47	4.4	5.8	1.31	Ambiguous	Both	NESdbO, BioGrid	136.58		D.C.	238
2ABD_HUMAN	Serine/threonine-protein phosphatase 2A 55 kDa regulatory subunit B delta isoform (PP2A subunit B isoform B55-delta) (PP2A subunit B isoform PR55-delta) (PP2A subunit B isoform R2-delta) (PP2A subunit B isoform delta)	49	4.3	22	5.09	Ambiguous	Cytoplasm		52.042		D.C.	2520
RPA1_HUMAN	DNA-directed RNA polymerase I subunit RPA1 (RNA polymerase I subunit A1) (EC 2.7.7.6) (A190) (DNA-directed RNA polymerase I largest subunit) (DNA-directed RNA polymerase I subunit A) (RNA polymerase I 194 kDa subunit) (RPA194)	17	4.3	2.1	0.489	Ambiguous	Nucleus		194.81		D.C.	622
TBA1C_HUMAN	Tubulin alpha-1C chain (Alpha-tubulin 6) (Tubulin alpha-6 chain)	39	4.2	90000	21700	Ambiguous	Cytoplasm		49.895		D.C.	3652
CCD53_HUMAN	WASH complex subunit CCDC53 (Coiled-coil domain-containing protein 53)	34	4.2	4.1	0.975	Ambiguous			21.172		D.C.	4669
MCE1_HUMAN	mRNA-capping enzyme (HCAP1) (HCE) [Includes: Polynucleotide 5'-triphosphatase (EC 3.1.3.33) (mRNA 5'-triphosphatase) (TPase); mRNA guanylyltransferase (EC 2.7.7.50) (GTP--RNA guanylyltransferase) (GTase)]	17	4.2	2.1	0.492	Ambiguous	Nucleus		52.533		D.C.	433
VP13B_HUMAN	Vacuolar protein sorting-associated protein 13B (Cohen syndrome protein 1)	2.3	4.2	0.28	0.0675	Ambiguous			445.98		D.C.	2770
RUFY3_HUMAN	Protein RUFY3 (Rap2-interacting protein x) (RIPx) (Single axon-regulated protein) (Singar)	7.2	4.1	0.88	0.214	Ambiguous	Cytoplasm		52.964		D.C.	2690
SH319_HUMAN	SH3 domain-containing protein 19 (ADAM-binding protein Eve-1) (EEN-binding protein) (EBP)	11	4	1.3	0.336	Ambiguous	Both		80.13		D.C.	2408
RBM22_HUMAN	Pre-mRNA-splicing factor RBM22 (RNA-binding motif protein 22) (Zinc finger CCCH domain-containing protein 16)	45	3.9	5.4	1.38	Ambiguous	Both		46.895		D.C.	4215
FANCA_HUMAN	Fanconi anemia group A protein (Protein FACA)	18	3.9	2.2	0.58	Ambiguous	Both	NESdbH	159.08		D.C.	270
GPTC8_HUMAN	G patch domain-containing protein 8	17	3.9	2.1	0.534	Ambiguous			155.19		D.C.	4491
E4F1_HUMAN	Transcription factor E4F1 (EC 6.3.2.-) (E4F transcription factor 1) (Putative E3 ubiquitin-protein ligase E4F1) (Transcription factor E4F) (p120E4F) (p50E4F)	14	3.8	1.7	0.453	Ambiguous	Both		83.495		D.C.	2519
DHX8_HUMAN	ATP-dependent RNA helicase DHX8 (EC 3.6.4.13) (DEAH box protein 8) (RNA helicase HRH1)	7	3.8	0.86	0.226	Ambiguous	Nucleus		139.31		D.C.	2113
SPAT5_HUMAN	Spermatogenesis-associated protein 5 (ATPase family protein 2 homolog) (Spermatogenesis-associated factor protein)	11	3.7	110	29.2	Ambiguous	Cytoplasm		97.903		D.C.	3027
SPB12_HUMAN	Serpin B12	1.9	3.7	39	10.6	Ambiguous	Cytoplasm		46.276		D.C.	3532
SBSN_HUMAN	Suprabasin	10	3.7	2.6	0.694	Ambiguous	Other		60.54	ER	D.C.	2630
ZC3HE_HUMAN	Zinc finger CCCH domain-containing protein 14 (Mammalian suppressor of tau pathology-2) (MSUT-2) (Renal carcinoma antigen NY-REN-37)	15	3.7	1.8	0.489	Ambiguous	Both		64.501		D.C.	2612
AZI2_HUMAN	5-azacytidine-induced protein 2 (NF-kappa-B-activating kinase-associated protein 1) (Nak-associated protein 1) (TILP)	22	3.6	2.7	0.744	Ambiguous	Cytoplasm		26.51		D.C.	3961
RENR_HUMAN	Renin receptor (ATPase H(+)-transporting lysosomal accessory protein 2) (ATPase H(+)-transporting lysosomal-interacting protein 2) (ER-localized type I transmembrane adaptor) (Embryonic liver differentiation factor 10) (N14F) (Renin/prorenin receptor) (Vacuolar ATP synthase membrane sector-associated protein M8-9) (ATP6M8-9) (V-ATPase M8.9 subunit)	10	3.6	1.3	0.347	Ambiguous	Cytoplasm		39.008	TM;ER	D.C.	500
DCD_HUMAN	Dermcidin (EC 3.4.-.-) (Preproteolysin) [Cleaved into: Survival-promoting peptide; DCD-1]	2.3	3.5	830	233	Ambiguous	Other		11.284	ER	D.C.	1761
S10A8_HUMAN	Protein S100-A8 (Calgranulin-A) (Calprotectin L1L subunit) (Cystic fibrosis antigen) (CFAG) (Leukocyte L1 complex light chain) (Migration inhibitory factor-related protein 8) (MRP-8) (p8) (S100 calcium-binding protein A8) (Urinary stone protein band A) [Cleaved into: Protein S100-A8, N-terminally processed]	26	3.5	380	107	Ambiguous	Cytoplasm		10.834		D.C.	719
GBB5_HUMAN	Guanine nucleotide-binding protein subunit beta-5 (Gbeta5) (Transducin beta chain 5)	39	3.5	4.7	1.35	Ambiguous			31.247		D.C.	203
LARP7_HUMAN	La-related protein 7 (La ribonucleoprotein domain family member 7) (P-TEFb-interaction protein for 7SK stability) (PIP7S)	43	3.4	5.2	1.54	Ambiguous	Nucleus		66.898		D.C.	2361
HMMR_HUMAN	Hyaluronan mediated motility receptor (Intracellular hyaluronic acid-binding protein) (Receptor for hyaluronan-mediated motility) (CD antigen CD168)	17	3.4	2.1	0.633	Ambiguous	Cytoplasm		82.3		D.C.	465
LYSC_HUMAN	Lysozyme C (EC 3.2.1.17) (1,4-beta-N-acetylmuramidase C)	5.5	3.3	47	14.1	Ambiguous	Other		16.537	ER	D.C.	1630
ETUD1_HUMAN	Elongation factor Tu GTP-binding domain-containing protein 1 (Elongation factor-like 1) (Protein FAM42A)	29	3.3	3.5	1.07	Ambiguous			125.43		D.C.	2718
PYC_HUMAN	Pyruvate carboxylase, mitochondrial (EC 6.4.1.1) (Pyruvic carboxylase) (PCB)	9.2	3.3	1	0.304	Ambiguous	Cytoplasm		129.63	MT	D.C.	847
STON2_HUMAN	Stonin-2 (Stoned B)	44	3.2	5.3	1.64	Ambiguous	Cytoplasm		101.16		D.C.	3205
BCD1_HUMAN	Box C/D snoRNA protein 1 (Serologically defined breast cancer antigen NY-BR-75) (Zinc finger HIT domain-containing protein 6)	6.4	3.2	0.78	0.239	Ambiguous			49.486		D.C.	4220
PIP_HUMAN	Prolactin-inducible protein (Gross cystic disease fluid protein 15) (GCDFP-15) (Prolactin-induced protein) (Secretory actin-binding protein) (SABP) (gp17)	9.7	3.1	71	22.7	Ambiguous	Other		16.572	ER	D.C.	859
AKAP9_HUMAN	A-kinase anchor protein 9 (AKAP-9) (A-kinase anchor protein 350 kDa) (AKAP 350) (hgAKAP 350) (A-kinase anchor protein 450 kDa) (AKAP 450) (AKAP 120-like protein) (Centrosome- and Golgi-localized PKN-associated protein) (CG-NAP) (Protein hyperion) (Protein kinase A-anchoring protein 9) (PRKA9) (Protein yotiao)	2.1	3.1	16	5.05	Ambiguous	Cytoplasm		452.98		D.C.	3635
DMXL2_HUMAN	DmX-like protein 2 (Rabconnectin-3)	19	3.1	2.4	0.762	Ambiguous	Cytoplasm		339.64		D.C.	3125
DEN4B_HUMAN	DENN domain-containing protein 4B	3.3	3.1	0.4	0.128	Ambiguous	Cytoplasm		163.84		D.C.	438
PEX7_HUMAN	Peroxisomal targeting signal 2 receptor (PTS2 receptor) (Peroxin-7)	49	3	5.9	1.99	Ambiguous	Cytoplasm		35.891		D.C.	168
M3K4_HUMAN	Mitogen-activated protein kinase kinase kinase 4 (EC 2.7.11.25) (MAP three kinase 1) (MAPK/ERK kinase kinase 4) (MEK kinase 4) (MEKK 4)	31	3	3.8	1.26	Ambiguous	Cytoplasm		177.01		D.C.	4798
CWC22_HUMAN	Pre-mRNA-splicing factor CWC22 homolog (Nucampholin homolog) (fSAPb)	26	3	3.2	1.06	Ambiguous	Nucleus		105.47		D.C.	4059
ABI2_HUMAN	Abl interactor 2 (Abelson interactor 2) (Abi-2) (Abl-binding protein 3) (AblBP3) (Arg-binding protein 1) (ArgBP1)	25	3	3.1	1.02	Ambiguous	Cytoplasm		52.445		D.C.	4271
GCP5_HUMAN	Gamma-tubulin complex component 5 (GCP-5)	6.6	3	0.8	0.269	Ambiguous	Cytoplasm		118.64		D.C.	3562
ANXA2_HUMAN	Annexin A2 (Annexin II) (Annexin-2) (Calpactin I heavy chain) (Calpactin-1 heavy chain) (Chromobindin-8) (Lipocortin II) (Placental anticoagulant protein IV) (PAP-IV) (Protein I) (p36)	250	2.9	10000	3400	Ambiguous	Cytoplasm		38.604		D.C.	757
DNJA2_HUMAN	DnaJ homolog subfamily A member 2 (Cell cycle progression restoration gene 3 protein) (Dnj3) (Dj3) (HIRA-interacting protein 4) (Renal carcinoma antigen NY-REN-14)	34	2.9	320	111	Ambiguous	Cytoplasm		45.745		D.C.	424
S10A9_HUMAN	Protein S100-A9 (Calgranulin-B) (Calprotectin L1H subunit) (Leukocyte L1 complex heavy chain) (Migration inhibitory factor-related protein 14) (MRP-14) (p14) (S100 calcium-binding protein A9)	42	2.9	210	72.1	Ambiguous	Cytoplasm		13.242		D.C.	738
RHPN2_HUMAN	Rhophilin-2 (76 kDa RhoB effector protein) (GTP-Rho-binding protein 2) (p76RBE)	450	2.9	55	19.3	Ambiguous	Cytoplasm		76.992		D.C.	2859
EXOS3_HUMAN	Exosome complex component RRP40 (Exosome component 3) (Ribosomal RNA-processing protein 40) (p10)	120	2.9	15	5.18	Ambiguous	Both		17.247		D.C.	4103
AES_HUMAN	Amino-terminal enhancer of split (Amino enhancer of split) (Gp130-associated protein GAM) (Grg-5) (Groucho-related protein 5) (Protein ESP1) (Protein GRG)	91	2.9	11	3.89	Ambiguous	Nucleus		21.97		D.C.	1884
ING5_HUMAN	Inhibitor of growth protein 5 (p28ING5)	42	2.9	5.1	1.76	Ambiguous	Nucleus		25.932		D.C.	3213
RN213_HUMAN	E3 ubiquitin-protein ligase RNF213 (EC 6.3.2.-) (ALK lymphoma oligomerization partner on chromosome 17) (Mysterin) (RING finger protein 213)	29	2.9	3.5	1.23	Ambiguous	Cytoplasm		591.4		D.C.	2511
TBB6_HUMAN	Tubulin beta-6 chain (Tubulin beta class V)	230	2.8	1000	359	Ambiguous	Cytoplasm		49.857		D.C.	3719
HNRPQ_HUMAN	Heterogeneous nuclear ribonucleoprotein Q (hnRNP Q) (Glycine- and tyrosine-rich RNA-binding protein) (GRY-RBP) (NS1-associated protein 1) (Synaptotagmin-binding, cytoplasmic RNA-interacting protein)	420	2.8	51	18.3	Ambiguous	Both		58.735		D.C.	393
DDX1_HUMAN	ATP-dependent RNA helicase DDX1 (EC 3.6.4.13) (DEAD box protein 1) (DEAD box protein retinoblastoma) (DBP-RB)	150	2.8	41	14.8	Ambiguous	Both	BioGrid	82.431		D.C.	3219
UXT_HUMAN	Protein UXT (Androgen receptor trapped clone 27 protein) (ART-27) (Ubiquitously expressed transcript protein)	160	2.8	19	6.87	Ambiguous	Both		18.246		D.C.	4374
ARHGH_HUMAN	Rho guanine nucleotide exchange factor 17 (164 kDa Rho-specific guanine-nucleotide exchange factor) (p164-RhoGEF) (p164RhoGEF) (Tumor endothelial marker 4)	18	2.8	2.2	0.79	Ambiguous			221.67		D.C.	3534
RTTN_HUMAN	Rotatin	8	2.8	0.97	0.344	Ambiguous	Cytoplasm		245.69		D.C.	2816
AP4S1_HUMAN	AP-4 complex subunit sigma-1 (AP-4 adaptor complex subunit sigma-1) (Adaptor-related protein complex 4 subunit sigma-1) (Sigma-1 subunit of AP-4) (Sigma-4-adaptin) (Sigma4-adaptin)	340	2.7	41	15.5	Ambiguous	Cytoplasm		17.005		D.C.	4736
APOL2_HUMAN	Apolipoprotein L2 (Apolipoprotein L-II) (ApoL-II)	240	2.7	30	10.8	Ambiguous	Cytoplasm		37.092		D.C.	3653
ARHG7_HUMAN	Rho guanine nucleotide exchange factor 7 (Beta-Pix) (COOL-1) (PAK-interacting exchange factor beta) (p85)	180	2.7	21	8	Ambiguous	Cytoplasm		73.139		D.C.	2083
UFM1_HUMAN	Ubiquitin-fold modifier 1	150	2.7	19	6.88	Ambiguous	Both		9.1175		D.C.	1637
WDR18_HUMAN	WD repeat-containing protein 18	120	2.7	15	5.48	Ambiguous	Both		47.405		D.C.	3734
TBAL3_HUMAN	Tubulin alpha chain-like 3	82	2.7	10	3.74	Ambiguous	Cytoplasm		45.517		D.C.	24
CNDG2_HUMAN	Condensin-2 complex subunit G2 (Chromosome-associated protein G2) (CAP-G2) (hCAP-G2) (Leucine zipper protein 5) (Non-SMC condensin II complex subunit G2)	44	2.7	5.4	2.02	Ambiguous	Nucleus		130.96		D.C.	2838
PDCD2_HUMAN	Programmed cell death protein 2 (Zinc finger MYND domain-containing protein 7) (Zinc finger protein Rp-8)	13	2.7	1.5	0.567	Ambiguous	Nucleus		35.29		D.C.	2274
NGAP_HUMAN	Ras GTPase-activating protein nGAP (RAS protein activator-like 2)	10	2.7	1.2	0.458	Ambiguous			143.9		D.C.	4458
FHAD1_HUMAN	Forkhead-associated domain-containing protein 1 (FHA domain-containing protein 1)	7.9	2.7	0.96	0.352	Ambiguous			157.69		D.C.	41
PP1A_HUMAN	Serine/threonine-protein phosphatase PP1-alpha catalytic subunit (PP-1A) (EC 3.1.3.16)	370	2.6	1400	545	Ambiguous	Both	BioGrid	37.512		D.C.	1646
WIPI2_HUMAN	WD repeat domain phosphoinositide-interacting protein 2 (WIPI-2) (WIPI49-like protein 2)	480	2.6	59	22.8	Ambiguous	Cytoplasm		47.543		D.C.	4721
TTI2_HUMAN	TELO2-interacting protein 2	330	2.6	41	15.8	Ambiguous			56.914		D.C.	2563
AP2A2_HUMAN	AP-2 complex subunit alpha-2 (100 kDa coated vesicle protein C) (Adaptor protein complex AP-2 subunit alpha-2) (Adaptor-related protein complex 2 subunit alpha-2) (Alpha-adaptin C) (Alpha2-adaptin) (Clathrin assembly protein complex 2 alpha-C large chain) (Huntingtin yeast partner J) (Huntingtin-interacting protein 9) (HIP-9) (Huntingtin-interacting protein J) (Plasma membrane adaptor HA2/AP2 ada…	150	2.6	19	7.33	Ambiguous	Cytoplasm		103.96		D.C.	564
GEMI4_HUMAN	Gem-associated protein 4 (Gemin-4) (Component of gems 4) (p97)	140	2.6	17	6.57	Ambiguous	Both	Thakar&Karaca	120.04		D.C.	1579
GCP4_HUMAN	Gamma-tubulin complex component 4 (GCP-4) (hGCP4) (Gamma-ring complex protein 76 kDa) (h76p) (hGrip76)	120	2.6	14	5.53	Ambiguous	Cytoplasm		76.017		D.C.	4406
NDK7_HUMAN	Nucleoside diphosphate kinase 7 (NDK 7) (NDP kinase 7) (EC 2.7.4.6) (nm23-H7)	71	2.6	8.7	3.28	Ambiguous			38.187		D.C.	4743
DHB4_HUMAN	Peroxisomal multifunctional enzyme type 2 (MFE-2) (17-beta-hydroxysteroid dehydrogenase 4) (17-beta-HSD 4) (D-bifunctional protein) (DBP) (Multifunctional protein 2) (MPF-2) [Cleaved into: (3R)-hydroxyacyl-CoA dehydrogenase (EC 1.1.1.n12); Enoyl-CoA hydratase 2 (EC 4.2.1.107) (EC 4.2.1.119) (3-alpha,7-alpha,12-alpha-trihydroxy-5-beta-cholest-24-enoyl-CoA hydratase)]	27	2.6	3.3	1.27	Ambiguous	Cytoplasm		79.685		D.C.	1461
EAPP_HUMAN	E2F-associated phosphoprotein (EAPP)	24	2.6	2.9	1.1	Ambiguous	Both		32.762		D.C.	2393
ATE1_HUMAN	Arginyl-tRNA--protein transferase 1 (Arginyltransferase 1) (R-transferase 1) (EC 2.3.2.8) (Arginine-tRNA--protein transferase 1)	320	2.5	39	15.9	Ambiguous	Both		59.09		D.C.	588
ARBK1_HUMAN	Beta-adrenergic receptor kinase 1 (Beta-ARK-1) (EC 2.7.11.15) (G-protein coupled receptor kinase 2)	250	2.5	30	12.1	Ambiguous			79.573		D.C.	1031
HDAC4_HUMAN	Histone deacetylase 4 (HD4) (EC 3.5.1.98)	220	2.5	27	10.9	Ambiguous	Both	NESdbH	119.04		D.C.	1570
ZN395_HUMAN	Zinc finger protein 395 (HD-regulating factor 2) (HDRF-2) (Huntington disease gene regulatory region-binding protein 2) (HD gene regulatory region-binding protein 2) (HDBP-2) (Papillomavirus regulatory factor 1) (PRF-1) (Papillomavirus-binding factor)	140	2.5	17	6.65	Ambiguous	Both		54.938		D.C.	3990
SYNJ1_HUMAN	Synaptojanin-1 (EC 3.1.3.36) (Synaptic inositol 1,4,5-trisphosphate 5-phosphatase 1)	98	2.5	12	4.74	Ambiguous	Cytoplasm		173.1		D.C.	312
STAM1_HUMAN	Signal transducing adapter molecule 1 (STAM-1)	62	2.5	7.6	3.06	Ambiguous	Cytoplasm		44.971		D.C.	3255
MPRIP_HUMAN	Myosin phosphatase Rho-interacting protein (M-RIP) (Rho-interacting protein 3) (RIP3) (p116Rip)	25	2.5	3.1	1.22	Ambiguous	Cytoplasm		116.53		D.C.	2637
RNF41_HUMAN	E3 ubiquitin-protein ligase NRDP1 (EC 6.3.2.-) (RING finger protein 41)	9.2	2.5	1.1	0.455	Ambiguous			35.905		D.C.	3943
P2R3A_HUMAN	Serine/threonine-protein phosphatase 2A regulatory subunit B'' subunit alpha (PP2A subunit B isoform PR72/PR130) (PP2A subunit B isoform R3 isoform) (PP2A subunit B isoforms B''-PR72/PR130) (PP2A subunit B isoforms B72/B130) (Serine/threonine-protein phosphatase 2A 72/130 kDa regulatory subunit B)	3.5	2.5	0.43	0.171	Ambiguous			130.28		D.C.	1858
DHX37_HUMAN	Probable ATP-dependent RNA helicase DHX37 (EC 3.6.4.13) (DEAH box protein 37)	3.2	2.5	0.39	0.157	Ambiguous			129.54		D.C.	2916
CCD18_HUMAN	Coiled-coil domain-containing protein 18 (Sarcoma antigen NY-SAR-24)	2.5	2.5	0.31	0.121	Ambiguous			151.25		D.C.	2462
BI2L1_HUMAN	Brain-specific angiogenesis inhibitor 1-associated protein 2-like protein 1 (BAI1-associated protein 2-like protein 1) (Insulin receptor tyrosine kinase substrate)	2.3	2.5	0.29	0.116	Ambiguous	Cytoplasm		56.882		D.C.	4425
H4_HUMAN	Histone H4	1.1	2.4	730	302	Ambiguous	Nucleus		11.367		D.C.	1684
DESP_HUMAN	Desmoplakin (DP) (250/210 kDa paraneoplastic pemphigus antigen)	18	2.4	580	241	Ambiguous	Cytoplasm		331.77		D.C.	911
PP1B_HUMAN	Serine/threonine-protein phosphatase PP1-beta catalytic subunit (PP-1B) (PPP1CD) (EC 3.1.3.16) (EC 3.1.3.53)	27	2.4	250	104	Ambiguous	Both		37.186		D.C.	1648
M3K2_HUMAN	Mitogen-activated protein kinase kinase kinase 2 (EC 2.7.11.25) (MAPK/ERK kinase kinase 2) (MEK kinase 2) (MEKK 2)	100	2.4	13	5.32	Ambiguous	Both	Thakar&Karaca	69.74		D.C.	4638
PHLA2_HUMAN	Pleckstrin homology-like domain family A member 2 (Beckwith-Wiedemann syndrome chromosomal region 1 candidate gene C protein) (Imprinted in placenta and liver protein) (Tumor-suppressing STF cDNA 3 protein) (Tumor-suppressing subchromosomal transferable fragment candidate gene 3 protein) (p17-Beckwith-Wiedemann region 1 C) (p17-BWR1C)	74	2.4	9.1	3.76	Ambiguous	Cytoplasm		17.092		D.C.	2377
RAD51_HUMAN	DNA repair protein RAD51 homolog 1 (HsRAD51) (hRAD51) (RAD51 homolog A)	59	2.4	7.2	2.98	Ambiguous	Both		36.966		D.C.	1867
KLDC2_HUMAN	Kelch domain-containing protein 2 (Hepatocellular carcinoma-associated antigen 33) (Host cell factor homolog LCP) (Host cell factor-like protein 1) (HCLP-1)	47	2.4	5.7	2.4	Ambiguous	Nucleus		46.098		D.C.	4639
NOL6_HUMAN	Nucleolar protein 6 (Nucleolar RNA-associated protein) (Nrap)	22	2.4	2.7	1.09	Ambiguous	Nucleus		112.3		D.C.	3958
IF122_HUMAN	Intraflagellar transport protein 122 homolog (WD repeat-containing protein 10) (WD repeat-containing protein 140)	5.4	2.4	0.67	0.28	Ambiguous	Cytoplasm		129.36		D.C.	4042
TRFL_HUMAN	Lactotransferrin (Lactoferrin) (EC 3.4.21.-) (Growth-inhibiting protein 12) (Talalactoferrin) [Cleaved into: Lactoferricin-H (Lfcin-H); Kaliocin-1; Lactoferroxin-A; Lactoferroxin-B; Lactoferroxin-C]	1	2.4	0.35	0.147	Ambiguous	Both		73.16	ER	D.C.	694
UBR1_HUMAN	E3 ubiquitin-protein ligase UBR1 (EC 6.3.2.-) (N-recognin-1) (Ubiquitin-protein ligase E3-alpha-1) (Ubiquitin-protein ligase E3-alpha-I)	91	2.3	31	13.8	Ambiguous	Cytoplasm	BioGrid	200.21		D.C.	2893
ERCC5_HUMAN	DNA repair protein complementing XP-G cells (EC 3.1.-.-) (DNA excision repair protein ERCC-5) (Xeroderma pigmentosum group G-complementing protein)	65	2.3	7.9	3.43	Ambiguous	Nucleus		133.11		D.C.	1085
PHF8_HUMAN	Histone lysine demethylase PHF8 (EC 1.14.11.27) (PHD finger protein 8)	21	2.3	2.5	1.13	Ambiguous	Nucleus		98.289		D.C.	4568
RGPA2_HUMAN	Ral GTPase-activating protein subunit alpha-2 (250 kDa substrate of Akt) (AS250) (p220)	3.3	2.3	0.41	0.179	Ambiguous	Cytoplasm		206.43		D.C.	2325
ACACA_HUMAN	Acetyl-CoA carboxylase 1 (ACC1) (EC 6.4.1.2) (ACC-alpha) [Includes: Biotin carboxylase (EC 6.3.4.14)]	55	2.2	690	308	Ambiguous	Cytoplasm		265.55		D.C.	1957
CFDP1_HUMAN	Craniofacial development protein 1 (Bucentaur)	440	2.2	54	25	Ambiguous	Other		33.592		D.C.	4396
PACS1_HUMAN	Phosphofurin acidic cluster sorting protein 1 (PACS-1)	240	2.2	30	13.7	Ambiguous	Cytoplasm	Thakar&Karaca	104.9		D.C.	2636
WBS22_HUMAN	Probable 18S rRNA (guanine-N(7))-methyltransferase (EC 2.1.1.-) (Bud site selection protein 23 homolog) (Metastasis-related methyltransferase 1) (Williams-Beuren syndrome chromosomal region 22 protein)	250	2.2	30	13.7	Ambiguous	Both		31.88		D.C.	340
AIDA_HUMAN	Axin interactor, dorsalization-associated protein (Axin interaction partner and dorsalization antagonist)	86	2.2	11	4.83	Ambiguous			35.023		D.C.	3348
HNRL2_HUMAN	Heterogeneous nuclear ribonucleoprotein U-like protein 2 (Scaffold-attachment factor A2) (SAF-A2)	35	2.2	5.6	2.58	Ambiguous	Nucleus		85.104		D.C.	2312
ASPP1_HUMAN	Apoptosis-stimulating of p53 protein 1 (Protein phosphatase 1 regulatory subunit 13B)	31	2.2	3.8	1.76	Ambiguous	Both		119.56		D.C.	3501
USP9Y_HUMAN	Probable ubiquitin carboxyl-terminal hydrolase FAF-Y (EC 3.4.19.12) (Deubiquitinating enzyme FAF-Y) (Fat facets protein-related, Y-linked) (Ubiquitin thioesterase FAF-Y) (Ubiquitin-specific protease 9, Y chromosome) (Ubiquitin-specific-processing protease FAF-Y)	0.97	2.2	0.12	0.0539	Ambiguous	Cytoplasm		291.07		D.C.	159
H2B1L_HUMAN	Histone H2B type 1-L (Histone H2B.c) (H2B/c)	8.7	2.1	530	252	Ambiguous	Nucleus		13.952		D.C.	417
CASP4_HUMAN	Caspase-4 (CASP-4) (EC 3.4.22.57) (ICE(rel)-II) (Protease ICH-2) (Protease TX) [Cleaved into: Caspase-4 subunit 1; Caspase-4 subunit 2]	59	2.1	64	31.3	Ambiguous	Cytoplasm		36.704		D.C.	1396
PALLD_HUMAN	Palladin (SIH002) (Sarcoma antigen NY-SAR-77)	260	2.1	52	24.9	Ambiguous	Cytoplasm		108.63		D.C.	3201
ELP4_HUMAN	Elongator complex protein 4 (hELP4) (PAX6 neighbor gene protein)	410	2.1	50	24.2	Ambiguous	Both		46.587		D.C.	3397
RL12_HUMAN	60S ribosomal protein L12	340	2.1	41	19.5	Ambiguous			17.818		D.C.	1111
SNAPN_HUMAN	SNARE-associated protein Snapin (Biogenesis of lysosome-related organelles complex 1 subunit 7) (BLOC-1 subunit 7) (Synaptosomal-associated protein 25-binding protein) (SNAP-associated protein)	300	2.1	37	17.4	Ambiguous	Cytoplasm		14.874		D.C.	593
CROCC_HUMAN	Rootletin (Ciliary rootlet coiled-coil protein)	130	2.1	15	7.46	Ambiguous	Cytoplasm		228.52		D.C.	2475
UBP34_HUMAN	Ubiquitin carboxyl-terminal hydrolase 34 (EC 3.4.19.12) (Deubiquitinating enzyme 34) (Ubiquitin thioesterase 34) (Ubiquitin-specific-processing protease 34)	100	2.1	12	6	Ambiguous			404.23		D.C.	2672
IFIT1_HUMAN	Interferon-induced protein with tetratricopeptide repeats 1 (IFIT-1) (Interferon-induced 56 kDa protein) (IFI-56K) (P56)	49	2.1	6	2.83	Ambiguous	Cytoplasm		51.713		D.C.	806
TYW4_HUMAN	tRNA wybutosine-synthesizing protein 4 (tRNA yW-synthesizing protein 4) (EC 2.1.1.290) (EC 2.3.1.231) (Leucine carboxyl methyltransferase 2) (tRNA(Phe) (7-(3-amino-3-(methoxycarbonyl)propyl)wyosine(37)-N)-methoxycarbonyltransferase) (tRNA(Phe) (7-(3-amino-3-carboxypropyl)wyosine(37)-O)-methyltransferase)	34	2.1	4.2	1.97	Ambiguous			75.601		D.C.	372
RL17_HUMAN	60S ribosomal protein L17 (60S ribosomal protein L23) (PD-1)	33	2.1	4	1.94	Ambiguous		Thakar&Karaca	21.397		D.C.	946
KTNA1_HUMAN	Katanin p60 ATPase-containing subunit A1 (Katanin p60 subunit A1) (EC 3.6.4.3) (p60 katanin)	17	2.1	2.1	0.985	Ambiguous	Cytoplasm		55.964		D.C.	480
H32_HUMAN	Histone H3.2 (Histone H3/m) (Histone H3/o)	1.3	2	280	139	Ambiguous	Nucleus		15.388		D.C.	1736
RS19_HUMAN	40S ribosomal protein S19	230	2	28	13.9	Ambiguous	Nucleus		16.06		D.C.	1237
KKCC1_HUMAN	Calcium/calmodulin-dependent protein kinase kinase 1 (CaM-KK 1) (CaM-kinase kinase 1) (CaMKK 1) (EC 2.7.11.17) (CaM-kinase IV kinase) (Calcium/calmodulin-dependent protein kinase kinase alpha) (CaM-KK alpha) (CaM-kinase kinase alpha) (CaMKK alpha)	200	2	24	12.2	Ambiguous	Both	NESdbO	55.735		D.C.	2991
GCP2_HUMAN	Gamma-tubulin complex component 2 (GCP-2) (hGCP2) (Gamma-ring complex protein 103 kDa) (h103p) (hGrip103) (Spindle pole body protein Spc97 homolog) (hSpc97)	80	2	9.8	4.82	Ambiguous	Cytoplasm		102.53		D.C.	3691
RNF31_HUMAN	E3 ubiquitin-protein ligase RNF31 (EC 6.3.2.-) (HOIL-1-interacting protein) (HOIP) (RING finger protein 31) (Zinc in-between-RING-finger ubiquitin-associated domain protein)	74	2	9	4.61	Ambiguous	Cytoplasm		119.65		D.C.	3411
EXOS1_HUMAN	Exosome complex component CSL4 (Exosome component 1)	45	2	5.5	2.78	Ambiguous	Both		21.452		D.C.	4665
PEX1_HUMAN	Peroxisome biogenesis factor 1 (Peroxin-1) (Peroxisome biogenesis disorder protein 1)	28	2	3.4	1.73	Ambiguous	Cytoplasm		142.87		D.C.	361
LARP1_HUMAN	La-related protein 1 (La ribonucleoprotein domain family member 1)	23	2	2.8	1.37	Ambiguous	Cytoplasm		123.51		D.C.	2613
AP5Z1_HUMAN	AP-5 complex subunit zeta-1 (Adaptor-related protein complex 5 zeta subunit) (Zeta5)	14	2	1.7	0.84	Ambiguous	Both		88.604		D.C.	298
SNUT2_HUMAN	U4/U6.U5 tri-snRNP-associated protein 2 (Inactive ubiquitin-specific peptidase 39) (SAD1 homolog) (U4/U6.U5 tri-snRNP-associated 65 kDa protein) (65K)	12	2	1.4	0.699	Ambiguous	Nucleus		53.51		D.C.	2380
GBLP_HUMAN	Guanine nucleotide-binding protein subunit beta-2-like 1 (Cell proliferation-inducing gene 21 protein) (Guanine nucleotide-binding protein subunit beta-like protein 12.3) (Human lung cancer oncogene 7 protein) (HLC-7) (Receptor for activated C kinase) (Receptor of activated protein kinase C 1) (RACK1) [Cleaved into: Guanine nucleotide-binding protein subunit beta-2-like 1, N-terminally processed]	2500	1.9	310	163	Ambiguous	Both		35.076		D.C.	1718
SERPH_HUMAN	Serpin H1 (47 kDa heat shock protein) (Arsenic-transactivated protein 3) (AsTP3) (Cell proliferation-inducing gene 14 protein) (Collagen-binding protein) (Colligin) (Rheumatoid arthritis-related antigen RA-A47)	350	1.9	260	139	Ambiguous	Cytoplasm		46.44	ER	D.C.	1423
GDS1_HUMAN	Rap1 GTPase-GDP dissociation stimulator 1 (Exchange factor smgGDS) (SMG GDS protein) (SMG P21 stimulatory GDP/GTP exchange protein)	1800	1.9	210	111	Ambiguous			66.316		D.C.	1483
OGT1_HUMAN	UDP-N-acetylglucosamine--peptide N-acetylglucosaminyltransferase 110 kDa subunit (EC 2.4.1.255) (O-GlcNAc transferase subunit p110) (O-linked N-acetylglucosamine transferase 110 kDa subunit) (OGT)	1000	1.9	120	63.9	Ambiguous	Both	Thakar&Karaca	116.92		D.C.	261
IST1_HUMAN	IST1 homolog (hIST1) (Putative MAPK-activating protein PM28)	860	1.9	110	55.5	Ambiguous	Cytoplasm		36.622		D.C.	1524
PACN2_HUMAN	Protein kinase C and casein kinase substrate in neurons protein 2 (Syndapin-2) (Syndapin-II)	580	1.9	71	37.7	Ambiguous	Cytoplasm		51.353		D.C.	4546
GCFC2_HUMAN	GC-rich sequence DNA-binding factor 2 (GC-rich sequence DNA-binding factor) (Transcription factor 9) (TCF-9)	290	1.9	35	18.9	Ambiguous	Nucleus		89.384		D.C.	919
ETS2_HUMAN	Protein C-ets-2	220	1.9	27	14.1	Ambiguous	Nucleus	BioGrid	53.001		D.C.	896
FAK1_HUMAN	Focal adhesion kinase 1 (FADK 1) (EC 2.7.10.2) (Focal adhesion kinase-related nonkinase) (FRNK) (Protein phosphatase 1 regulatory subunit 71) (PPP1R71) (Protein-tyrosine kinase 2) (p125FAK) (pp125FAK)	220	1.9	27	14.7	Ambiguous	Both	NESdbH	119.23		D.C.	1850
CACO1_HUMAN	Calcium-binding and coiled-coil domain-containing protein 1 (Calphoglin) (Coiled-coil coactivator protein) (Sarcoma antigen NY-SAR-3)	100	1.9	13	6.7	Ambiguous	Both		70.978		D.C.	4331
ABL2_HUMAN	Abelson tyrosine-protein kinase 2 (EC 2.7.10.2) (Abelson murine leukemia viral oncogene homolog 2) (Abelson-related gene protein) (Tyrosine-protein kinase ARG)	54	1.9	6.6	3.5	Ambiguous	Cytoplasm		126.22		D.C.	1294
PELP1_HUMAN	Proline-, glutamic acid- and leucine-rich protein 1 (Modulator of non-genomic activity of estrogen receptor) (Transcription factor HMX3)	35	1.9	4.3	2.27	Ambiguous	Both		119.7		D.C.	2939
VPS45_HUMAN	Vacuolar protein sorting-associated protein 45 (h-VPS45) (hlVps45)	25	1.9	3.1	1.61	Ambiguous	Cytoplasm		65.076		D.C.	4144
TPM1_HUMAN	Tropomyosin alpha-1 chain (Alpha-tropomyosin) (Tropomyosin-1)	17	1.9	2.1	1.15	Ambiguous	Cytoplasm		32.847		D.C.	799
F199X_HUMAN	Protein FAM199X	7.7	1.9	0.94	0.481	Ambiguous			42.801		D.C.	2596
2AAA_HUMAN	Serine/threonine-protein phosphatase 2A 65 kDa regulatory subunit A alpha isoform (Medium tumor antigen-associated 61 kDa protein) (PP2A subunit A isoform PR65-alpha) (PP2A subunit A isoform R1-alpha)	240	1.8	1900	1030	Ambiguous	Cytoplasm		65.308		D.C.	1116
DAAF5_HUMAN	Dynein assembly factor 5, axonemal (HEAT repeat-containing protein 2)	400	1.8	330	188	Ambiguous	Cytoplasm		93.52		D.C.	2848
FHL3_HUMAN	Four and a half LIM domains protein 3 (FHL-3) (Skeletal muscle LIM-protein 2) (SLIM-2)	1000	1.8	120	70.1	Ambiguous			31.192		D.C.	2049
IN35_HUMAN	Interferon-induced 35 kDa protein (IFP 35) (Ifi-35)	770	1.8	94	52.4	Ambiguous	Nucleus		31.546		D.C.	1757
CUL3_HUMAN	Cullin-3 (CUL-3)	330	1.8	50	28.6	Ambiguous	Both		86.233		D.C.	2040
AAR2_HUMAN	Protein AAR2 homolog (AAR2 splicing factor homolog)	340	1.8	41	22.9	Ambiguous			43.472		D.C.	4653
NEMO_HUMAN	NF-kappa-B essential modulator (NEMO) (FIP-3) (IkB kinase-associated protein 1) (IKKAP1) (Inhibitor of nuclear factor kappa-B kinase subunit gamma) (I-kappa-B kinase subunit gamma) (IKK-gamma) (IKKG) (IkB kinase subunit gamma) (NF-kappa-B essential modifier)	320	1.8	39	22.3	Ambiguous	Both		55.786		D.C.	4795
CSTF2_HUMAN	Cleavage stimulation factor subunit 2 (CF-1 64 kDa subunit) (Cleavage stimulation factor 64 kDa subunit) (CSTF 64 kDa subunit) (CstF-64)	210	1.8	26	14.6	Ambiguous	Nucleus		59.251		D.C.	1167
IKKB_HUMAN	Inhibitor of nuclear factor kappa-B kinase subunit beta (I-kappa-B-kinase beta) (IKK-B) (IKK-beta) (IkBKB) (EC 2.7.11.10) (I-kappa-B kinase 2) (IKK2) (Nuclear factor NF-kappa-B inhibitor kinase beta) (NFKBIKB)	200	1.8	24	13.3	Ambiguous	Both		86.563		D.C.	217
PUS7L_HUMAN	Pseudouridylate synthase 7 homolog-like protein (EC 5.4.99.-)	190	1.8	23	12.9	Ambiguous			80.7		D.C.	3871
EXOS9_HUMAN	Exosome complex component RRP45 (Autoantigen PM/Scl 1) (Exosome component 9) (P75 polymyositis-scleroderma overlap syndrome-associated autoantigen) (Polymyositis/scleroderma autoantigen 1) (Polymyositis/scleroderma autoantigen 75 kDa) (PM/Scl-75)	160	1.8	19	10.7	Ambiguous	Both		48.948		D.C.	1861
HNRL1_HUMAN	Heterogeneous nuclear ribonucleoprotein U-like protein 1 (Adenovirus early region 1B-associated protein 5) (E1B-55 kDa-associated protein 5) (E1B-AP5)	77	1.8	9.5	5.14	Ambiguous	Nucleus		84.793		D.C.	3723
KIF3A_HUMAN	Kinesin-like protein KIF3A (Microtubule plus end-directed kinesin motor 3A)	58	1.8	7.1	4.03	Ambiguous	Cytoplasm		80.04		D.C.	4698
PMF1_HUMAN	Polyamine-modulated factor 1 (PMF-1)	53	1.8	6.5	3.6	Ambiguous	Nucleus		23.339		D.C.	2570
PCM1_HUMAN	Pericentriolar material 1 protein (PCM-1) (hPCM-1)	40	1.8	4.8	2.62	Ambiguous	Cytoplasm		222.22		D.C.	2193
ACSL3_HUMAN	Long-chain-fatty-acid--CoA ligase 3 (EC 6.2.1.3) (Long-chain acyl-CoA synthetase 3) (LACS 3)	6.4	1.8	4.2	2.39	Ambiguous	Cytoplasm		80.419	TM	D.C.	621
RHG18_HUMAN	Rho GTPase-activating protein 18 (MacGAP) (Rho-type GTPase-activating protein 18)	24	1.8	2.9	1.56	Ambiguous			70.163		D.C.	2969
UBX2B_HUMAN	UBX domain-containing protein 2B (NSFL1 cofactor p37) (p97 cofactor p37)	15	1.8	1.9	1.05	Ambiguous	Both		37.076		D.C.	2158
XRN2_HUMAN	5'-3' exoribonuclease 2 (EC 3.1.13.-) (DHM1-like protein) (DHP protein)	3.9	1.8	0.48	0.269	Ambiguous	Nucleus	BioGrid	99.96		D.C.	3863
HSPB1_HUMAN	Heat shock protein beta-1 (HspB1) (28 kDa heat shock protein) (Estrogen-regulated 24 kDa protein) (Heat shock 27 kDa protein) (HSP 27) (Stress-responsive protein 27) (SRP27)	140	1.7	11000	6420	Ambiguous	Both		22.782		D.C.	714
UBE2O_HUMAN	E2/E3 hybrid ubiquitin-protein ligase UBE2O (EC 6.3.2.-) (EC 6.3.2.19) (Ubiquitin carrier protein O) (Ubiquitin-conjugating enzyme E2 O) (Ubiquitin-conjugating enzyme E2 of 230 kDa) (Ubiquitin-conjugating enzyme E2-230K) (Ubiquitin-protein ligase O)	2000	1.7	250	145	Ambiguous	Both		141.29		D.C.	3830
TCEA1_HUMAN	Transcription elongation factor A protein 1 (Transcription elongation factor S-II protein 1) (Transcription elongation factor TFIIS.o)	850	1.7	100	60.9	Ambiguous	Nucleus		33.969		D.C.	1007
AAPK1_HUMAN	5'-AMP-activated protein kinase catalytic subunit alpha-1 (AMPK subunit alpha-1) (EC 2.7.11.1) (Acetyl-CoA carboxylase kinase) (ACACA kinase) (EC 2.7.11.27) (Hydroxymethylglutaryl-CoA reductase kinase) (HMGCR kinase) (EC 2.7.11.31) (Tau-protein kinase PRKAA1) (EC 2.7.11.26)	440	1.7	54	31.8	Ambiguous	Both		64.009		D.C.	1964
T2EB_HUMAN	Transcription initiation factor IIE subunit beta (TFIIE-beta) (General transcription factor IIE subunit 2)	230	1.7	28	16.6	Ambiguous	Nucleus		33.043		D.C.	1088
NECP1_HUMAN	Adaptin ear-binding coat-associated protein 1 (NECAP endocytosis-associated protein 1) (NECAP-1)	210	1.7	26	15.4	Ambiguous	Cytoplasm		29.737		D.C.	3039
NF2IP_HUMAN	NFATC2-interacting protein (45 kDa NF-AT-interacting protein) (45 kDa NFAT-interacting protein) (Nuclear factor of activated T-cells, cytoplasmic 2-interacting protein)	170	1.7	21	12.4	Ambiguous	Both		45.816		D.C.	3042
DTWD2_HUMAN	DTW domain-containing protein 2	150	1.7	18	10.5	Ambiguous			33.415		D.C.	3029
HGS_HUMAN	Hepatocyte growth factor-regulated tyrosine kinase substrate (Hrs) (Protein pp110)	140	1.7	18	10.3	Ambiguous	Cytoplasm		86.191		D.C.	223
SNX8_HUMAN	Sorting nexin-8	130	1.7	16	9.22	Ambiguous	Cytoplasm		52.569		D.C.	4764
AMRA1_HUMAN	Activating molecule in BECN1-regulated autophagy protein 1	110	1.7	13	7.81	Ambiguous	Cytoplasm		132.84		D.C.	3829
MCL1_HUMAN	Induced myeloid leukemia cell differentiation protein Mcl-1 (Bcl-2-like protein 3) (Bcl2-L-3) (Bcl-2-related protein EAT/mcl1) (mcl1/EAT)	110	1.7	13	7.71	Ambiguous	Both		37.337	TM	D.C.	1877
DD19B_HUMAN	ATP-dependent RNA helicase DDX19B (EC 3.6.4.13) (DEAD box RNA helicase DEAD5) (DEAD box protein 19B)	63	1.7	7.7	4.64	Ambiguous	Both		53.926		D.C.	4534
ISY1_HUMAN	Pre-mRNA-splicing factor ISY1 homolog	41	1.7	5	3.04	Ambiguous	Nucleus		32.992		D.C.	4524
TAF6L_HUMAN	TAF6-like RNA polymerase II p300/CBP-associated factor-associated factor 65 kDa subunit 6L (PCAF-associated factor 65-alpha) (PAF65-alpha)	41	1.7	5	2.9	Ambiguous	Nucleus		67.814		D.C.	4794
NUMA1_HUMAN	Nuclear mitotic apparatus protein 1 (NuMA protein) (Nuclear matrix protein-22) (NMP-22) (SP-H antigen)	34	1.7	4.1	2.42	Ambiguous	Both		236.51		D.C.	2153
CQ059_HUMAN	Uncharacterized protein C17orf59	6.2	1.7	0.76	0.438	Ambiguous			37.226		D.C.	3451
SRRM1_HUMAN	Serine/arginine repetitive matrix protein 1 (SR-related nuclear matrix protein of 160 kDa) (SRm160) (Ser/Arg-related nuclear matrix protein)	2.8	1.7	0.34	0.199	Ambiguous	Nucleus		102.12		D.C.	2921
PPIB_HUMAN	Peptidyl-prolyl cis-trans isomerase B (PPIase B) (EC 5.2.1.8) (CYP-S1) (Cyclophilin B) (Rotamase B) (S-cyclophilin) (SCYLP)	2900	1.6	360	227	Ambiguous	Cytoplasm		23.742	ER	D.C.	1009
SART3_HUMAN	Squamous cell carcinoma antigen recognized by T-cells 3 (SART-3) (Tat-interacting protein of 110 kDa) (Tip110) (p110 nuclear RNA-binding protein)	1300	1.6	190	119	Ambiguous	Both		109.93		D.C.	2167
CSN3_HUMAN	COP9 signalosome complex subunit 3 (SGN3) (Signalosome subunit 3) (JAB1-containing signalosome subunit 3)	830	1.6	100	65.1	Ambiguous	Both		47.873		D.C.	4554
AHNK_HUMAN	Neuroblast differentiation-associated protein AHNAK (Desmoyokin)	16	1.6	74	45.4	Ambiguous	Nucleus		629.09		D.C.	1907
RFC2_HUMAN	Replication factor C subunit 2 (Activator 1 40 kDa subunit) (A1 40 kDa subunit) (Activator 1 subunit 2) (Replication factor C 40 kDa subunit) (RF-C 40 kDa subunit) (RFC40)	610	1.6	74	47	Ambiguous	Nucleus		39.157		D.C.	1187
NELFE_HUMAN	Negative elongation factor E (NELF-E) (RNA-binding protein RD)	180	1.6	22	13.7	Ambiguous	Nucleus		43.239		D.C.	945
ML12A_HUMAN	Myosin regulatory light chain 12A (Epididymis secretory protein Li 24) (HEL-S-24) (MLC-2B) (Myosin RLC) (Myosin regulatory light chain 2, nonsarcomeric) (Myosin regulatory light chain MRLC3)	150	1.6	18	11.5	Ambiguous			19.794		D.C.	222
TTC28_HUMAN	Tetratricopeptide repeat protein 28 (TPR repeat protein 28) (TPR repeat-containing big gene cloned at Keio)	76	1.6	9.2	5.89	Ambiguous	Cytoplasm		270.88		D.C.	3337
RL9_HUMAN	60S ribosomal protein L9	26	1.6	3.1	1.91	Ambiguous		Thakar&Karaca	21.863		D.C.	1165
VP13D_HUMAN	Vacuolar protein sorting-associated protein 13D	0.88	1.6	0.11	0.0652	Ambiguous			489.05		D.C.	2472
SUMO2_HUMAN	Small ubiquitin-related modifier 2 (SUMO-2) (HSMT3) (SMT3 homolog 2) (SUMO-3) (Sentrin-2) (Ubiquitin-like protein SMT3B) (Smt3B)	18	1.5	860	566	Ambiguous	Nucleus	BioGrid	8.1111		D.C.	1636
SRP14_HUMAN	Signal recognition particle 14 kDa protein (SRP14) (18 kDa Alu RNA-binding protein)	3100	1.5	380	245	Ambiguous	Cytoplasm		14.57		D.C.	1225
PRP19_HUMAN	Pre-mRNA-processing factor 19 (EC 6.3.2.-) (Nuclear matrix protein 200) (PRP19/PSO4 homolog) (hPso4) (Senescence evasion factor)	2700	1.5	320	221	Ambiguous	Both		55.18		D.C.	4535
KDM1A_HUMAN	Lysine-specific histone demethylase 1A (EC 1.-.-.-) (BRAF35-HDAC complex protein BHC110) (Flavin-containing amine oxidase domain-containing protein 2)	150	1.5	42	29	Ambiguous	Nucleus		92.902		D.C.	380
URFB1_HUMAN	UHRF1-binding protein 1 (ICBP90-binding protein 1) (Ubiquitin-like containing PHD and RING finger domains 1-binding protein 1)	240	1.5	29	19.9	Ambiguous			159.48		D.C.	2536
RPC2_HUMAN	DNA-directed RNA polymerase III subunit RPC2 (RNA polymerase III subunit C2) (EC 2.7.7.6) (C128) (DNA-directed RNA polymerase III 127.6 kDa polypeptide) (DNA-directed RNA polymerase III subunit B)	160	1.5	19	13.2	Ambiguous	Nucleus		121.12		D.C.	4213
VAT1_HUMAN	Synaptic vesicle membrane protein VAT-1 homolog (EC 1.-.-.-)	140	1.5	17	11.4	Ambiguous	Cytoplasm		41.92		D.C.	3595
GAK_HUMAN	Cyclin-G-associated kinase (EC 2.7.11.1)	100	1.5	12	8.39	Ambiguous	Cytoplasm		143.19		D.C.	226
TSC2_HUMAN	Tuberin (Tuberous sclerosis 2 protein)	100	1.5	12	8.17	Ambiguous	Cytoplasm		193.25		D.C.	1406
ARH_HUMAN	Low density lipoprotein receptor adapter protein 1 (Autosomal recessive hypercholesterolemia protein)	92	1.5	11	7.58	Ambiguous	Cytoplasm		33.885		D.C.	2435
SNX33_HUMAN	Sorting nexin-33 (SH3 and PX domain-containing protein 3)	41	1.5	5.1	3.47	Ambiguous	Cytoplasm		65.264		D.C.	3177
PCNT_HUMAN	Pericentrin (Kendrin) (Pericentrin-B)	35	1.5	4.3	2.93	Ambiguous	Cytoplasm	NESdbH	378.03		D.C.	623
MA7D1_HUMAN	MAP7 domain-containing protein 1 (Arginine/proline-rich coiled-coil domain-containing protein 1) (Proline/arginine-rich coiled-coil domain-containing protein 1)	34	1.5	4.1	2.83	Ambiguous	Cytoplasm		89.466		D.C.	2343
MCES_HUMAN	mRNA cap guanine-N7 methyltransferase (EC 2.1.1.56) (RG7MT1) (mRNA (guanine-N(7)-)-methyltransferase) (mRNA cap methyltransferase) (hCMT1) (hMet) (hcm1p)	32	1.5	3.9	2.5	Ambiguous	Nucleus		54.843		D.C.	283
VP26B_HUMAN	Vacuolar protein sorting-associated protein 26B (Vesicle protein sorting 26B)	23	1.5	2.8	1.9	Ambiguous	Cytoplasm		39.154		D.C.	2360
BACD3_HUMAN	BTB/POZ domain-containing adapter for CUL3-mediated RhoA degradation protein 3 (hBACURD3) (BTB/POZ domain-containing protein KCTD10) (Potassium channel tetramerization domain-containing protein 10)	18	1.5	2.2	1.52	Ambiguous	Nucleus		32.779		D.C.	3914
F172A_HUMAN	Protein FAM172A	9.2	1.5	1.1	0.767	Ambiguous	Other		35.8	ER	D.C.	3164
PRAME_HUMAN	Melanoma antigen preferentially expressed in tumors (Opa-interacting protein 4) (OIP-4) (Preferentially expressed antigen of melanoma)	8.7	1.5	1.1	0.692	Ambiguous	Both		57.889		D.C.	1751
ELP3_HUMAN	Elongator complex protein 3 (hELP3) (EC 2.3.1.48)	1300	1.4	150	110	Ambiguous	Both		62.258		D.C.	4016
RS20_HUMAN	40S ribosomal protein S20	1100	1.4	130	97.3	Ambiguous	Cytoplasm		13.373		D.C.	1599
HDAC1_HUMAN	Histone deacetylase 1 (HD1) (EC 3.5.1.98)	530	1.4	65	46.4	Ambiguous	Nucleus	NESdbH	55.102		D.C.	2025
LMO7_HUMAN	LIM domain only protein 7 (LMO-7) (F-box only protein 20) (LOMP)	1100	1.4	65	45.7	Ambiguous			153.67		D.C.	3196
ACSL4_HUMAN	Long-chain-fatty-acid--CoA ligase 4 (EC 6.2.1.3) (Long-chain acyl-CoA synthetase 4) (LACS 4)	11	1.4	63	45.9	Ambiguous	Cytoplasm		74.435	TM	D.C.	389
TF2B_HUMAN	Transcription initiation factor IIB (General transcription factor TFIIB) (S300-II)	240	1.4	30	20.5	Ambiguous	Nucleus		34.833		D.C.	1784
LRC47_HUMAN	Leucine-rich repeat-containing protein 47	210	1.4	26	18.8	Ambiguous			63.472		D.C.	2960
RBL2B_HUMAN	Rab-like protein 2B	88	1.4	11	7.42	Ambiguous			26.172		D.C.	4372
T11L1_HUMAN	T-complex protein 11-like protein 1	56	1.4	6.9	4.91	Ambiguous			57.034		D.C.	4175
FXL18_HUMAN	F-box/LRR-repeat protein 18 (F-box and leucine-rich repeat protein 18)	35	1.4	4.3	3.04	Ambiguous			78.919		D.C.	3511
SYF1_HUMAN	Pre-mRNA-splicing factor SYF1 (Protein HCNP) (XPA-binding protein 2)	32	1.4	4	2.8	Ambiguous	Nucleus		100.01		D.C.	4066
ARHG2_HUMAN	Rho guanine nucleotide exchange factor 2 (Guanine nucleotide exchange factor H1) (GEF-H1) (Microtubule-regulated Rho-GEF) (Proliferating cell nucleolar antigen p40)	31	1.4	3.7	2.74	Ambiguous	Cytoplasm		108.24		D.C.	3281
KBTB7_HUMAN	Kelch repeat and BTB domain-containing protein 7	4.2	1.4	0.51	0.361	Ambiguous			77.163		D.C.	3190
K1522_HUMAN	Uncharacterized protein KIAA1522	0.9	1.4	0.11	0.0776	Ambiguous			107.09		D.C.	4333
PCF11_HUMAN	Pre-mRNA cleavage complex 2 protein Pcf11 (Pre-mRNA cleavage complex II protein Pcf11)	0.48	1.4	0.059	0.0437	Ambiguous	Nucleus		173.05		D.C.	554
CDV3_HUMAN	Protein CDV3 homolog	1600	1.3	190	147	Ambiguous	Cytoplasm		27.335		D.C.	4501
FLII_HUMAN	Protein flightless-1 homolog	830	1.3	100	80.9	Ambiguous	Both		138.49		D.C.	1954
DPOLA_HUMAN	DNA polymerase alpha catalytic subunit (EC 2.7.7.7) (DNA polymerase alpha catalytic subunit p180)	680	1.3	83	62.3	Ambiguous	Nucleus		165.91		D.C.	804
FNTB_HUMAN	Protein farnesyltransferase subunit beta (FTase-beta) (EC 2.5.1.58) (CAAX farnesyltransferase subunit beta) (Ras proteins prenyltransferase subunit beta)	560	1.3	68	51.4	Ambiguous			48.773		D.C.	1378
LSM2_HUMAN	U6 snRNA-associated Sm-like protein LSm2 (Protein G7b) (Small nuclear ribonuclear protein D homolog) (snRNP core Sm-like protein Sm-x5)	460	1.3	56	43.2	Ambiguous	Nucleus		10.834		D.C.	4657
RS15A_HUMAN	40S ribosomal protein S15a	360	1.3	44	34.9	Ambiguous			14.839		D.C.	1654
CWC27_HUMAN	Peptidyl-prolyl cis-trans isomerase CWC27 homolog (PPIase CWC27) (EC 5.2.1.8) (Antigen NY-CO-10) (Serologically defined colon cancer antigen 10)	190	1.3	23	17.8	Ambiguous			53.846		D.C.	2631
BCL9L_HUMAN	B-cell CLL/lymphoma 9-like protein (B-cell lymphoma 9-like protein) (BCL9-like protein) (Protein BCL9-2)	86	1.3	11	7.89	Ambiguous	Nucleus		152.55		D.C.	2795
MAEA_HUMAN	Macrophage erythroblast attacher (Cell proliferation-inducing gene 5 protein) (Erythroblast macrophage protein) (Human lung cancer oncogene 10 protein) (HLC-10)	75	1.3	9.1	7.03	Ambiguous	Both		40.409		D.C.	2703
OTU6B_HUMAN	OTU domain-containing protein 6B (EC 3.4.19.12) (DUBA-5)	60	1.3	7.4	5.62	Ambiguous		Thakar&Karaca	33.812		D.C.	2997
CHD1_HUMAN	Chromodomain-helicase-DNA-binding protein 1 (CHD-1) (EC 3.6.4.12) (ATP-dependent helicase CHD1)	53	1.3	6.5	5.11	Ambiguous	Both		196.59		D.C.	187
TBCD7_HUMAN	TBC1 domain family member 7 (Cell migration-inducing protein 23)	34	1.3	4.1	3.19	Ambiguous	Cytoplasm		30.746		D.C.	4318
DHX9_HUMAN	ATP-dependent RNA helicase A (RHA) (EC 3.6.4.13) (DEAH box protein 9) (Leukophysin) (LKP) (Nuclear DNA helicase II) (NDH II)	27	1.3	3.3	2.52	Ambiguous	Both		140.96		D.C.	1887
FTM_HUMAN	Protein fantom (Nephrocystin-8) (RPGR-interacting protein 1-like protein) (RPGRIP1-like protein)	27	1.3	3.3	2.52	Ambiguous	Cytoplasm		142.79		D.C.	2524
RRN3_HUMAN	RNA polymerase I-specific transcription initiation factor RRN3 (Transcription initiation factor IA) (TIF-IA)	25	1.3	3.1	2.28	Ambiguous	Nucleus		74.106		D.C.	4285
ARMC8_HUMAN	Armadillo repeat-containing protein 8	22	1.3	2.7	2.06	Ambiguous			75.509		D.C.	2865
HERC1_HUMAN	Probable E3 ubiquitin-protein ligase HERC1 (EC 6.3.2.-) (HECT domain and RCC1-like domain-containing protein 1) (p532) (p619)	19	1.3	2.3	1.84	Ambiguous	Cytoplasm		532.22		D.C.	2255
SSNA1_HUMAN	Sjoegren syndrome nuclear autoantigen 1 (Nuclear autoantigen of 14 kDa)	19	1.3	2.3	1.79	Ambiguous	Both		13.596		D.C.	348
YTDC2_HUMAN	Probable ATP-dependent RNA helicase YTHDC2 (EC 3.6.4.13)	16	1.3	2	1.49	Ambiguous			160.25		D.C.	3960
THOC6_HUMAN	THO complex subunit 6 homolog (Functional spliceosome-associated protein 35) (fSAP35) (WD repeat-containing protein 58)	9.5	1.3	1.2	0.878	Ambiguous	Nucleus		32.89		D.C.	2819
CBPA4_HUMAN	Carboxypeptidase A4 (EC 3.4.17.-) (Carboxypeptidase A3)	2	1.3	0.51	0.4	Ambiguous	Other		43.57	ER	D.C.	4441
DDB1_HUMAN	DNA damage-binding protein 1 (DDB p127 subunit) (DNA damage-binding protein a) (DDBa) (Damage-specific DNA-binding protein 1) (HBV X-associated protein 1) (XAP-1) (UV-damaged DNA-binding factor) (UV-damaged DNA-binding protein 1) (UV-DDB 1) (XPE-binding factor) (XPE-BF) (Xeroderma pigmentosum group E-complementing protein) (XPCe)	250	1.2	940	802	Ambiguous	Both		126.97		D.C.	2281
SRC8_HUMAN	Src substrate cortactin (Amplaxin) (Oncogene EMS1)	68	1.2	680	591	Ambiguous	Cytoplasm	Thakar&Karaca	61.585		D.C.	2099
LC7L2_HUMAN	Putative RNA-binding protein Luc7-like 2	1900	1.2	230	197	Ambiguous	Nucleus		46.513		D.C.	4661
CUL4A_HUMAN	Cullin-4A (CUL-4A)	850	1.2	200	165	Ambiguous			87.679		D.C.	2041
IGBP1_HUMAN	Immunoglobulin-binding protein 1 (B-cell signal transduction molecule alpha 4) (Protein alpha-4) (CD79a-binding protein 1) (Protein phosphatase 2/4/6 regulatory subunit) (Renal carcinoma antigen NY-REN-16)	1300	1.2	160	132	Ambiguous	Cytoplasm		39.221		D.C.	1741
NUDC1_HUMAN	NudC domain-containing protein 1 (Chronic myelogenous leukemia tumor antigen 66) (Tumor antigen CML66)	1300	1.2	150	126	Ambiguous	Both		66.755		D.C.	3559
SMD3_HUMAN	Small nuclear ribonucleoprotein Sm D3 (Sm-D3) (snRNP core protein D3)	770	1.2	95	75.7	Ambiguous	Both		13.916		D.C.	1669
EIF3K_HUMAN	Eukaryotic translation initiation factor 3 subunit K (eIF3k) (Eukaryotic translation initiation factor 3 subunit 12) (Muscle-specific gene M9 protein) (PLAC-24) (eIF-3 p25) (eIF-3 p28)	770	1.2	94	79.9	Ambiguous	Both		25.059		D.C.	4380
NELFB_HUMAN	Negative elongation factor B (NELF-B) (Cofactor of BRCA1)	250	1.2	47	40.6	Ambiguous	Nucleus		65.697		D.C.	3200
T2EA_HUMAN	General transcription factor IIE subunit 1 (General transcription factor IIE 56 kDa subunit) (Transcription initiation factor IIE subunit alpha) (TFIIE-alpha)	250	1.2	30	24.9	Ambiguous	Nucleus		49.452		D.C.	1087
HDAC2_HUMAN	Histone deacetylase 2 (HD2) (EC 3.5.1.98)	210	1.2	26	22.3	Ambiguous	Both		55.364		D.C.	3254
DPCD_HUMAN	Protein DPCD	200	1.2	24	20.4	Ambiguous			23.239		D.C.	3751
MAT1_HUMAN	CDK-activating kinase assembly factor MAT1 (CDK7/cyclin-H assembly factor) (Cyclin-G1-interacting protein) (Menage a trois) (RING finger protein 66) (RING finger protein MAT1) (p35) (p36)	170	1.2	21	17.7	Ambiguous	Nucleus		31.148		D.C.	1472
F115A_HUMAN	Protein FAM115A	150	1.2	18	14.5	Ambiguous			101.89		D.C.	4704
KIF3B_HUMAN	Kinesin-like protein KIF3B (HH0048) (Microtubule plus end-directed kinesin motor 3B) [Cleaved into: Kinesin-like protein KIF3B, N-terminally processed]	73	1.2	8.9	7.31	Ambiguous	Cytoplasm		85.124		D.C.	241
SP100_HUMAN	Nuclear autoantigen Sp-100 (Nuclear dot-associated Sp100 protein) (Speckled 100 kDa)	60	1.2	7.3	6.08	Ambiguous	Both		100.42		D.C.	1015
EXOC3_HUMAN	Exocyst complex component 3 (Exocyst complex component Sec6)	41	1.2	5	4.28	Ambiguous			73.796		D.C.	403
MKLN1_HUMAN	Muskelin	40	1.2	4.9	4.23	Ambiguous	Cytoplasm		84.767		D.C.	4509
BSDC1_HUMAN	BSD domain-containing protein 1	32	1.2	3.9	3.31	Ambiguous			37.16		D.C.	4216
PKHG2_HUMAN	Pleckstrin homology domain-containing family G member 2 (PH domain-containing family G member 2)	31	1.2	3.8	3.06	Ambiguous			147.97		D.C.	3981
NUF2_HUMAN	Kinetochore protein Nuf2 (hNuf2) (hNuf2R) (hsNuf2) (Cell division cycle-associated protein 1)	28	1.2	3.5	2.84	Ambiguous	Nucleus		54.303		D.C.	3805
PITM1_HUMAN	Membrane-associated phosphatidylinositol transfer protein 1 (Drosophila retinal degeneration B homolog) (Phosphatidylinositol transfer protein, membrane-associated 1) (PITPnm 1) (Pyk2 N-terminal domain-interacting receptor 2) (NIR-2)	23	1.2	2.8	2.37	Ambiguous	Cytoplasm		134.77		D.C.	165
DJC13_HUMAN	DnaJ homolog subfamily C member 13 (Required for receptor-mediated endocytosis 8) (RME-8)	22	1.2	2.7	2.28	Ambiguous			254.41		D.C.	455
ACINU_HUMAN	Apoptotic chromatin condensation inducer in the nucleus (Acinus)	21	1.2	2.5	2.21	Ambiguous	Nucleus		150.56		D.C.	4499
ANM1_HUMAN	Protein arginine N-methyltransferase 1 (EC 2.1.1.-) (Histone-arginine N-methyltransferase PRMT1) (EC 2.1.1.125) (Interferon receptor 1-bound protein 4)	880	1.1	1700	1540	Ambiguous	Both	Thakar&Karaca	39.602		D.C.	3631
CDK1_HUMAN	Cyclin-dependent kinase 1 (CDK1) (EC 2.7.11.22) (EC 2.7.11.23) (Cell division control protein 2 homolog) (Cell division protein kinase 1) (p34 protein kinase)	6500	1.1	800	725	Ambiguous	Both		34.095		D.C.	736
AAKG1_HUMAN	5'-AMP-activated protein kinase subunit gamma-1 (AMPK gamma1) (AMPK subunit gamma-1) (AMPKg)	880	1.1	110	101	Ambiguous			34.083		D.C.	1535
NMI_HUMAN	N-myc-interactor (Nmi) (N-myc and STAT interactor)	910	1.1	110	97.2	Ambiguous	Cytoplasm		35.056		D.C.	1986
RFC4_HUMAN	Replication factor C subunit 4 (Activator 1 37 kDa subunit) (A1 37 kDa subunit) (Activator 1 subunit 4) (Replication factor C 37 kDa subunit) (RF-C 37 kDa subunit) (RFC37)	910	1.1	110	98.7	Ambiguous	Nucleus		39.681		D.C.	1186
BRCC3_HUMAN	Lys-63-specific deubiquitinase BRCC36 (EC 3.4.19.-) (BRCA1-A complex subunit BRCC36) (BRCA1/BRCA2-containing complex subunit 3) (BRCA1/BRCA2-containing complex subunit 36) (BRISC complex subunit BRCC36)	810	1.1	99	87.5	Ambiguous	Nucleus		33.149		D.C.	1325
2AAB_HUMAN	Serine/threonine-protein phosphatase 2A 65 kDa regulatory subunit A beta isoform (PP2A subunit A isoform PR65-beta) (PP2A subunit A isoform R1-beta)	640	1.1	78	74	Ambiguous			66.213		D.C.	1117
DCTN4_HUMAN	Dynactin subunit 4 (Dyn4) (Dynactin subunit p62)	21	1.1	61	53	Ambiguous	Both		52.337		D.C.	4464
PP1G_HUMAN	Serine/threonine-protein phosphatase PP1-gamma catalytic subunit (PP-1G) (EC 3.1.3.16) (Protein phosphatase 1C catalytic subunit)	480	1.1	59	53.4	Ambiguous	Both		38.518		D.C.	1220
NEK7_HUMAN	Serine/threonine-protein kinase Nek7 (EC 2.7.11.1) (Never in mitosis A-related kinase 7) (NimA-related protein kinase 7)	450	1.1	55	50.6	Ambiguous	Both		34.551		D.C.	3128
HNRH1_HUMAN	Heterogeneous nuclear ribonucleoprotein H (hnRNP H) [Cleaved into: Heterogeneous nuclear ribonucleoprotein H, N-terminally processed]	34	1.1	49	43.4	Ambiguous	Nucleus		49.229		D.C.	1147
UBR2_HUMAN	E3 ubiquitin-protein ligase UBR2 (EC 6.3.2.-) (N-recognin-2) (Ubiquitin-protein ligase E3-alpha-2) (Ubiquitin-protein ligase E3-alpha-II)	250	1.1	30	27.8	Ambiguous	Nucleus		200.54		D.C.	2894
CI078_HUMAN	Uncharacterized protein C9orf78 (Hepatocellular carcinoma-associated antigen 59)	210	1.1	25	22.8	Ambiguous			33.688		D.C.	4292
RBCC1_HUMAN	RB1-inducible coiled-coil protein 1 (FAK family kinase-interacting protein of 200 kDa) (FIP200)	130	1.1	16	15.2	Ambiguous	Both		182.85		D.C.	3129
RAD50_HUMAN	DNA repair protein RAD50 (hRAD50) (EC 3.6.-.-)	59	1.1	7.2	6.31	Ambiguous	Nucleus		153.89		D.C.	3267
SPC24_HUMAN	Kinetochore protein Spc24 (hSpc24)	45	1.1	5.5	5.14	Ambiguous	Nucleus		22.478		D.C.	3036
SAS6_HUMAN	Spindle assembly abnormal protein 6 homolog (HsSAS-6)	35	1.1	4.2	3.69	Ambiguous	Cytoplasm		74.396		D.C.	2627
BOP1_HUMAN	Ribosome biogenesis protein BOP1 (Block of proliferation 1 protein)	13	1.1	1.5	1.37	Ambiguous	Nucleus		83.629		D.C.	2076
PLOD2_HUMAN	Procollagen-lysine,2-oxoglutarate 5-dioxygenase 2 (EC 1.14.11.4) (Lysyl hydroxylase 2) (LH2)	0.76	1.1	1.5	1.4	Ambiguous	Cytoplasm		84.685	ER	D.C.	153
AP5M1_HUMAN	AP-5 complex subunit mu-1 (Adaptor-related protein complex 5 subunit mu-1) (Mu5) (Mu-2-related death-inducing protein) (MuD) (Putative HIV-1 infection-related protein)	11	1.1	1.3	1.18	Ambiguous	Cytoplasm		54.766		D.C.	3874
RHG32_HUMAN	Rho GTPase-activating protein 32 (Brain-specific Rho GTPase-activating protein) (GAB-associated Cdc42/Rac GTPase-activating protein) (GC-GAP) (GTPase regulator interacting with TrkA) (Rho-type GTPase-activating protein 32) (Rho/Cdc42/Rac GTPase-activating protein RICS) (RhoGAP involved in the beta-catenin-N-cadherin and NMDA receptor signaling) (p200RhoGAP) (p250GAP)	7.2	1.1	0.87	0.792	Ambiguous	Cytoplasm		190.97		D.C.	35
MO4L2_HUMAN	Mortality factor 4-like protein 2 (MORF-related gene X protein) (Protein MSL3-2) (Transcription factor-like protein MRGX)	3	1.1	0.36	0.321	Ambiguous	Nucleus		32.307		D.C.	2164
CAZA1_HUMAN	F-actin-capping protein subunit alpha-1 (CapZ alpha-1)	10000	1	1200	1230	Ambiguous	Cytoplasm		32.922		D.C.	1501
RL22_HUMAN	60S ribosomal protein L22 (EBER-associated protein) (EAP) (Epstein-Barr virus small RNA-associated protein) (Heparin-binding protein HBp15)	1700	1	210	204	Ambiguous		Thakar&Karaca	14.787		D.C.	1188
PAIP1_HUMAN	Polyadenylate-binding protein-interacting protein 1 (PABP-interacting protein 1) (PAIP-1) (Poly(A)-binding protein-interacting protein 1)	450	1	99	97	Ambiguous	Cytoplasm		53.524		D.C.	3854
TRI65_HUMAN	Tripartite motif-containing protein 65	350	1	42	40.7	Ambiguous			57.353		D.C.	2610
HDGR2_HUMAN	Hepatoma-derived growth factor-related protein 2 (HRP-2) (Hepatoma-derived growth factor 2) (HDGF-2)	330	1	41	39.6	Ambiguous			74.316		D.C.	2745
STPAP_HUMAN	Speckle targeted PIP5K1A-regulated poly(A) polymerase (Star-PAP) (EC 2.7.7.19) (RNA-binding motif protein 21) (RNA-binding protein 21) (U6 snRNA-specific terminal uridylyltransferase 1) (U6-TUTase) (EC 2.7.7.52)	270	1	33	31.7	Ambiguous	Nucleus		93.846		D.C.	3954
SF3B2_HUMAN	Splicing factor 3B subunit 2 (Pre-mRNA-splicing factor SF3b 145 kDa subunit) (SF3b145) (SF3b150) (Spliceosome-associated protein 145) (SAP 145)	240	1	29	28.2	Ambiguous	Nucleus		100.23		D.C.	2007
MTA70_HUMAN	N6-adenosine-methyltransferase 70 kDa subunit (MT-A70) (EC 2.1.1.62) (Methyltransferase-like protein 3)	120	1	14	14.5	Ambiguous	Nucleus		64.473		D.C.	2789
DCAF6_HUMAN	DDB1- and CUL4-associated factor 6 (Androgen receptor complex-associated protein) (ARCAP) (IQ motif and WD repeat-containing protein 1) (Nuclear receptor interaction protein) (NRIP)	41	1	5	4.8	Ambiguous	Nucleus		96.291		D.C.	2399
RMD5A_HUMAN	Protein RMD5 homolog A	34	1	4.2	4.21	Ambiguous			43.992		D.C.	3987
DNA2_HUMAN	DNA replication ATP-dependent helicase/nuclease DNA2 (hDNA2) (DNA replication ATP-dependent helicase-like homolog) [Includes: DNA replication nuclease DNA2 (EC 3.1.-.-); DNA replication ATP-dependent helicase DNA2 (EC 3.6.4.12)]	7.3	1	0.89	0.855	Ambiguous	Both		119.5		D.C.	1453
WDR26_HUMAN	WD repeat-containing protein 26 (CUL4- and DDB1-associated WDR protein 2) (Myocardial ischemic preconditioning up-regulated protein 2)	110	0.99	14	14.1	Ambiguous	Cytoplasm		70.459		D.C.	3979
GAN_HUMAN	Gigaxonin (Kelch-like protein 16)	77	0.99	9.5	9.6	Ambiguous	Cytoplasm		67.638		D.C.	3900
FA83G_HUMAN	Protein FAM83G (Protein associated with SMAD1)	20	0.99	2.4	2.45	Ambiguous	Both		90.834		D.C.	17
RPAC1_HUMAN	DNA-directed RNA polymerases I and III subunit RPAC1 (DNA-directed RNA polymerase I subunit C) (RNA polymerases I and III subunit AC1) (AC40) (DNA-directed RNA polymerases I and III 40 kDa polypeptide) (RPA40) (RPA39) (RPC40)	1100	0.98	130	131	Ambiguous	Nucleus		39.249		D.C.	251
SNX27_HUMAN	Sorting nexin-27	41	0.98	5.1	5.15	Ambiguous	Cytoplasm		59.81		D.C.	3504
CAMP1_HUMAN	Calmodulin-regulated spectrin-associated protein 1	24	0.98	3	3.03	Ambiguous	Cytoplasm		177.97		D.C.	2451
RFC3_HUMAN	Replication factor C subunit 3 (Activator 1 38 kDa subunit) (A1 38 kDa subunit) (Activator 1 subunit 3) (Replication factor C 38 kDa subunit) (RF-C 38 kDa subunit) (RFC38)	440	0.97	54	56	Ambiguous	Nucleus		40.556		D.C.	1258
PTBP1_HUMAN	Polypyrimidine tract-binding protein 1 (PTB) (57 kDa RNA-binding protein PPTB-1) (Heterogeneous nuclear ribonucleoprotein I) (hnRNP I)	210	0.97	25	25.9	Ambiguous	Nucleus		57.221		D.C.	1057
HMHA1_HUMAN	Minor histocompatibility protein HA-1 [Cleaved into: Minor histocompatibility antigen HA-1 (mHag HA-1)]	56	0.97	6.9	7.12	Ambiguous			124.61		D.C.	3242
CUL2_HUMAN	Cullin-2 (CUL-2)	16	0.96	44	46.1	Ambiguous			86.982		D.C.	2039
ARHGG_HUMAN	Rho guanine nucleotide exchange factor 16 (Ephexin-4)	220	0.96	27	27.9	Ambiguous	Cytoplasm		80.104		D.C.	2490
CNDD3_HUMAN	Condensin-2 complex subunit D3 (Non-SMC condensin II complex subunit D3) (hCAP-D3)	8	0.96	0.98	1.03	Ambiguous	Nucleus		168.89		D.C.	1295
NPM3_HUMAN	Nucleoplasmin-3	1100	0.95	140	143	Ambiguous	Nucleus		19.343		D.C.	488
S30BP_HUMAN	SAP30-binding protein (Transcriptional regulator protein HCNGP)	110	0.95	13	14	Ambiguous	Nucleus		32.068		D.C.	4426
EIF3F_HUMAN	Eukaryotic translation initiation factor 3 subunit F (eIF3f) (Deubiquitinating enzyme eIF3f) (EC 3.4.19.12) (Eukaryotic translation initiation factor 3 subunit 5) (eIF-3-epsilon) (eIF3 p47)	340	0.94	220	238	Ambiguous	Cytoplasm		37.563		D.C.	139
PHOCN_HUMAN	MOB-like protein phocein (2C4D) (Class II mMOB1) (Mob1 homolog 3) (Mob3) (Mps one binder kinase activator-like 3) (Preimplantation protein 3)	130	0.94	15	16.3	Ambiguous	Cytoplasm		22.318		D.C.	4662
ACACB_HUMAN	Acetyl-CoA carboxylase 2 (EC 6.4.1.2) (ACC-beta) [Includes: Biotin carboxylase (EC 6.3.4.14)]	1.1	0.94	0.13	0.139	Ambiguous	Both		268.16	MT	D.C.	174
PP2AA_HUMAN	Serine/threonine-protein phosphatase 2A catalytic subunit alpha isoform (PP2A-alpha) (EC 3.1.3.16) (Replication protein C) (RP-C)	3600	0.93	440	467	Ambiguous	Both	NESdbH	35.594		D.C.	1723
PRI2_HUMAN	DNA primase large subunit (EC 2.7.7.-) (DNA primase 58 kDa subunit) (p58)	680	0.93	83	89.2	Ambiguous			58.805		D.C.	1395
P4R3B_HUMAN	Serine/threonine-protein phosphatase 4 regulatory subunit 3B (SMEK homolog 2)	100	0.93	13	13.6	Ambiguous	Both		93.717		D.C.	2423
PNKP_HUMAN	Bifunctional polynucleotide phosphatase/kinase (DNA 5'-kinase/3'-phosphatase) (Polynucleotide kinase-3'-phosphatase) [Includes: Polynucleotide 3'-phosphatase (EC 3.1.3.32) (2'(3')-polynucleotidase); Polynucleotide 5'-hydroxyl-kinase (EC 2.7.1.78)]	3.8	0.93	0.47	0.5	Ambiguous	Nucleus		57.076		D.C.	3582
U520_HUMAN	U5 small nuclear ribonucleoprotein 200 kDa helicase (EC 3.6.4.13) (Activating signal cointegrator 1 complex subunit 3-like 1) (BRR2 homolog) (U5 snRNP-specific 200 kDa protein) (U5-200KD)	300	0.92	37	39.8	Ambiguous	Nucleus		244.5		D.C.	492
RSMB_HUMAN	Small nuclear ribonucleoprotein-associated proteins B and B' (snRNP-B) (Sm protein B/B') (Sm-B/B') (SmB/B')	240	0.92	30	32.3	Ambiguous	Both		23.656		D.C.	892
INADL_HUMAN	InaD-like protein (Inadl protein) (hINADL) (Pals1-associated tight junction protein) (Protein associated to tight junctions)	44	0.92	5.4	5.82	Ambiguous	Cytoplasm		196.37		D.C.	3084
TANC1_HUMAN	Protein TANC1 (Tetratricopeptide repeat, ankyrin repeat and coiled-coil domain-containing protein 1)	26	0.92	3.2	3.43	Ambiguous	Cytoplasm		191.43		D.C.	3832
RPAB3_HUMAN	DNA-directed RNA polymerases I, II, and III subunit RPABC3 (RNA polymerases I, II, and III subunit ABC3) (DNA-directed RNA polymerase II subunit H) (DNA-directed RNA polymerases I, II, and III 17.1 kDa polypeptide) (RPB17) (RPB8 homolog) (hRPB8)	2800	0.91	340	376	Ambiguous	Nucleus		17.143		D.C.	1485
FRIH_HUMAN	Ferritin heavy chain (Ferritin H subunit) (EC 1.16.3.1) (Cell proliferation-inducing gene 15 protein) [Cleaved into: Ferritin heavy chain, N-terminally processed]	1500	0.91	190	206	Ambiguous			21.225		D.C.	696
F120B_HUMAN	Constitutive coactivator of peroxisome proliferator-activated receptor gamma (Constitutive coactivator of PPAR-gamma) (Constitutive coactivator of PPARG) (PPARG constitutive coactivator 1) (PGCC1) (Protein FAM120B)	15	0.91	1.8	1.99	Ambiguous	Nucleus		103.78		D.C.	3407
RL7_HUMAN	60S ribosomal protein L7	300	0.9	36	40.1	Ambiguous		Thakar&Karaca	29.225		D.C.	942
U119B_HUMAN	Protein unc-119 homolog B	350	0.89	43	48.6	Ambiguous	Cytoplasm		28.136		D.C.	26
PDZ11_HUMAN	PDZ domain-containing protein 11 (ATPase-interacting PDZ protein) (Plasma membrane calcium ATPase-interacting single-PDZ protein) (PMCA-interacting single-PDZ protein)	68	0.89	8.3	9.33	Ambiguous	Cytoplasm		16.131		D.C.	2404
TACC2_HUMAN	Transforming acidic coiled-coil-containing protein 2 (Anti-Zuai-1) (AZU-1)	25	0.89	3.1	3.47	Ambiguous	Both		301.05		D.C.	599
ROAA_HUMAN	Heterogeneous nuclear ribonucleoprotein A/B (hnRNP A/B) (APOBEC1-binding protein 1) (ABBP-1)	56	0.88	6.8	7.71	Ambiguous	Both		30.588		D.C.	3621
HPS5_HUMAN	Hermansky-Pudlak syndrome 5 protein (Alpha-integrin-binding protein 63) (Ruby-eye protein 2 homolog) (Ru2)	26	0.88	3.2	3.61	Ambiguous	Cytoplasm		114.82		D.C.	4586
AFAD_HUMAN	Afadin (ALL1-fused gene from chromosome 6 protein) (Protein AF-6)	2.2	0.88	0.26	0.299	Ambiguous	Cytoplasm		205.6		D.C.	1551
ELP6_HUMAN	Elongator complex protein 6 (Angiotonin-transactivated protein 1) (Protein TMEM103)	220	0.87	27	31.7	Ambiguous			29.793		D.C.	1909
CENPM_HUMAN	Centromere protein M (CENP-M) (Interphase centromere complex protein 39) (Proliferation-associated nuclear element protein 1)	120	0.87	15	17.4	Ambiguous	Both		19.737		D.C.	4159
RS27A_HUMAN	Ubiquitin-40S ribosomal protein S27a (Ubiquitin carboxyl extension protein 80) [Cleaved into: Ubiquitin; 40S ribosomal protein S27a]	36	0.86	7400	8590	Ambiguous	Both		17.965		D.C.	1704
2A5E_HUMAN	Serine/threonine-protein phosphatase 2A 56 kDa regulatory subunit epsilon isoform (PP2A B subunit isoform B'-epsilon) (PP2A B subunit isoform B56-epsilon) (PP2A B subunit isoform PR61-epsilon) (PP2A B subunit isoform R5-epsilon)	240	0.86	29	34.1	Ambiguous	Cytoplasm		54.042		D.C.	2282
GGA3_HUMAN	ADP-ribosylation factor-binding protein GGA3 (Golgi-localized, gamma ear-containing, ARF-binding protein 3)	57	0.86	6.9	8.09	Ambiguous	Cytoplasm		78.314		D.C.	4291
UCKL1_HUMAN	Uridine-cytidine kinase-like 1 (EC 2.7.1.48)	220	0.85	27	31.4	Ambiguous	Both		61.14		D.C.	4235
EHD4_HUMAN	EH domain-containing protein 4 (Hepatocellular carcinoma-associated protein 10/11) (PAST homolog 4)	120	0.85	14	16.7	Ambiguous	Cytoplasm		61.174		D.C.	3895
P85B_HUMAN	Phosphatidylinositol 3-kinase regulatory subunit beta (PI3-kinase regulatory subunit beta) (PI3K regulatory subunit beta) (PtdIns-3-kinase regulatory subunit beta) (Phosphatidylinositol 3-kinase 85 kDa regulatory subunit beta) (PI3-kinase subunit p85-beta) (PtdIns-3-kinase regulatory subunit p85-beta)	25	0.84	3	3.57	Ambiguous			81.544		D.C.	152
NRBF2_HUMAN	Nuclear receptor-binding factor 2 (NRBF-2) (Comodulator of PPAR and RXR)	13	0.84	1.6	1.88	Ambiguous	Both		26.955		D.C.	3424
M3K5_HUMAN	Mitogen-activated protein kinase kinase kinase 5 (EC 2.7.11.25) (Apoptosis signal-regulating kinase 1) (ASK-1) (MAPK/ERK kinase kinase 5) (MEK kinase 5) (MEKK 5)	6.2	0.84	0.76	0.897	Ambiguous	Cytoplasm		154.54		D.C.	3615
GSK3A_HUMAN	Glycogen synthase kinase-3 alpha (GSK-3 alpha) (EC 2.7.11.26) (Serine/threonine-protein kinase GSK3A) (EC 2.7.11.1)	110	0.83	14	16.9	Ambiguous			50.98		D.C.	1407
YPEL5_HUMAN	Protein yippee-like 5	7.6	0.83	0.93	1.12	Ambiguous			13.841		D.C.	1679
EPIPL_HUMAN	Epiplakin (450 kDa epidermal antigen)	1.8	0.83	0.22	0.265	Ambiguous	Cytoplasm		555.61		D.C.	1586
RTF1_HUMAN	RNA polymerase-associated protein RTF1 homolog	570	0.82	70	85.5	Ambiguous	Nucleus		80.313		D.C.	3226
PRP8_HUMAN	Pre-mRNA-processing-splicing factor 8 (220 kDa U5 snRNP-specific protein) (PRP8 homolog) (Splicing factor Prp8) (p220)	170	0.82	21	25.7	Ambiguous	Nucleus		273.6		D.C.	2581
NEDD4_HUMAN	E3 ubiquitin-protein ligase NEDD4 (EC 6.3.2.-) (Cell proliferation-inducing gene 53 protein) (Neural precursor cell expressed developmentally down-regulated protein 4) (NEDD-4)	82	0.82	10	12.2	Ambiguous	Cytoplasm	NESdbH	104.22		D.C.	1333
PYRG1_HUMAN	CTP synthase 1 (EC 6.3.4.2) (CTP synthetase 1) (UTP--ammonia ligase 1)	6700	0.81	820	1000	Ambiguous			66.69		D.C.	934
AP2S1_HUMAN	AP-2 complex subunit sigma (Adaptor protein complex AP-2 subunit sigma) (Adaptor-related protein complex 2 subunit sigma) (Clathrin assembly protein 2 sigma small chain) (Clathrin coat assembly protein AP17) (Clathrin coat-associated protein AP17) (HA2 17 kDa subunit) (Plasma membrane adaptor AP-2 17 kDa protein) (Sigma2-adaptin)	1600	0.81	190	237	Ambiguous	Cytoplasm		17.018		D.C.	1520
LRC40_HUMAN	Leucine-rich repeat-containing protein 40	530	0.81	65	81	Ambiguous			68.249		D.C.	4008
ZRAB2_HUMAN	Zinc finger Ran-binding domain-containing protein 2 (Zinc finger protein 265) (Zinc finger, splicing)	240	0.81	29	36.1	Ambiguous	Nucleus		36.318		D.C.	580
PNMA1_HUMAN	Paraneoplastic antigen Ma1 (37 kDa neuronal protein) (Neuron- and testis-specific protein 1)	15	0.81	1.9	2.28	Ambiguous	Both		39.761		D.C.	3048
AAPK2_HUMAN	5'-AMP-activated protein kinase catalytic subunit alpha-2 (AMPK subunit alpha-2) (EC 2.7.11.1) (Acetyl-CoA carboxylase kinase) (ACACA kinase) (EC 2.7.11.27) (Hydroxymethylglutaryl-CoA reductase kinase) (HMGCR kinase) (EC 2.7.11.31)	13	0.81	1.6	2.03	Ambiguous	Both	NESdbO	62.319		D.C.	1536
ZMAT2_HUMAN	Zinc finger matrin-type protein 2	43	0.8	5.3	6.64	Ambiguous	Nucleus		23.612		D.C.	3522
CCNL2_HUMAN	Cyclin-L2 (Paneth cell-enhanced expression protein)	23	0.8	2.8	3.56	Ambiguous	Nucleus		58.147		D.C.	3572
RBPMS_HUMAN	RNA-binding protein with multiple splicing (RBP-MS) (Heart and RRM expressed sequence) (Hermes)	21	0.8	2.5	3.16	Ambiguous	Both		15.794		D.C.	3294
1433E_HUMAN	14-3-3 protein epsilon (14-3-3E)	320	0.79	7000	8840	Ambiguous	Cytoplasm	BioGrid	29.174		D.C.	1658
KLH26_HUMAN	Kelch-like protein 26	1.6	0.79	0.2	0.256	Ambiguous			68.139		D.C.	2383
CAPZB_HUMAN	F-actin-capping protein subunit beta (CapZ beta)	4400	0.78	540	693	Ambiguous	Cytoplasm		30.628		D.C.	1342
FKBP5_HUMAN	Peptidyl-prolyl cis-trans isomerase FKBP5 (PPIase FKBP5) (EC 5.2.1.8) (51 kDa FK506-binding protein) (51 kDa FKBP) (FKBP-51) (54 kDa progesterone receptor-associated immunophilin) (Androgen-regulated protein 6) (FF1 antigen) (FK506-binding protein 5) (FKBP-5) (FKBP54) (p54) (HSP90-binding immunophilin) (Rotamase)	1700	0.78	210	268	Ambiguous	Both	Thakar&Karaca	51.212		D.C.	2010
BRE_HUMAN	BRCA1-A complex subunit BRE (BRCA1/BRCA2-containing complex subunit 45) (Brain and reproductive organ-expressed protein)	430	0.78	52	67.2	Ambiguous	Both		43.551		D.C.	4258
N4BP1_HUMAN	NEDD4-binding protein 1 (N4BP1)	47	0.78	5.7	7.31	Ambiguous	Nucleus		100.38		D.C.	440
BCL9_HUMAN	B-cell CLL/lymphoma 9 protein (B-cell lymphoma 9 protein) (Bcl-9) (Protein legless homolog)	10	0.78	1.2	1.59	Ambiguous	Nucleus		149.29		D.C.	160
HNRPU_HUMAN	Heterogeneous nuclear ribonucleoprotein U (hnRNP U) (Scaffold attachment factor A) (SAF-A) (p120) (pp120)	15	0.77	220	289	Ambiguous	Both		90.583		D.C.	1796
DI3L2_HUMAN	DIS3-like exonuclease 2 (hDIS3L2) (EC 3.1.13.-)	160	0.77	19	25.3	Ambiguous	Cytoplasm	Thakar&Karaca	99.278		D.C.	2924
PDRG1_HUMAN	p53 and DNA damage-regulated protein 1	26	0.77	3.2	4.11	Ambiguous	Cytoplasm		15.511		D.C.	4174
RIR1_HUMAN	Ribonucleoside-diphosphate reductase large subunit (EC 1.17.4.1) (Ribonucleoside-diphosphate reductase subunit M1) (Ribonucleotide reductase large subunit)	35	0.76	280	373	Ambiguous	Cytoplasm		90.069		D.C.	1021
HECD3_HUMAN	E3 ubiquitin-protein ligase HECTD3 (EC 6.3.2.-) (HECT domain-containing protein 3)	170	0.76	20	26.5	Ambiguous	Cytoplasm		97.112		D.C.	2445
DPOE2_HUMAN	DNA polymerase epsilon subunit 2 (EC 2.7.7.7) (DNA polymerase II subunit 2) (DNA polymerase epsilon subunit B)	14	0.76	1.7	2.24	Ambiguous	Nucleus		56.784		D.C.	1568
PFKAM_HUMAN	ATP-dependent 6-phosphofructokinase, muscle type (ATP-PFK) (PFK-M) (EC 2.7.1.11) (6-phosphofructokinase type A) (Phosphofructo-1-kinase isozyme A) (PFK-A) (Phosphohexokinase)	79	0.75	400	527	Ambiguous	Cytoplasm		85.182		D.C.	780
DCTN2_HUMAN	Dynactin subunit 2 (50 kDa dynein-associated polypeptide) (Dynactin complex 50 kDa subunit) (DCTN-50) (p50 dynamitin)	100	0.75	130	174	Ambiguous	Cytoplasm		44.23		D.C.	2027
SND1_HUMAN	Staphylococcal nuclease domain-containing protein 1 (100 kDa coactivator) (EBNA2 coactivator p100) (Tudor domain-containing protein 11) (p100 co-activator)	61	0.75	7.5	10	Ambiguous	Both		102		D.C.	2687
CYH3_HUMAN	Cytohesin-3 (ARF nucleotide-binding site opener 3) (Protein ARNO3) (General receptor of phosphoinositides 1) (Grp1) (PH, SEC7 and coiled-coil domain-containing protein 3)	31	0.75	3.8	5.15	Ambiguous	Cytoplasm		46.291		D.C.	342
MLH1_HUMAN	DNA mismatch repair protein Mlh1 (MutL protein homolog 1)	3.8	0.75	0.46	0.615	Ambiguous	Nucleus	NESdbH	84.6		D.C.	1249
CSN2_HUMAN	COP9 signalosome complex subunit 2 (SGN2) (Signalosome subunit 2) (Alien homolog) (JAB1-containing signalosome subunit 2) (Thyroid receptor-interacting protein 15) (TR-interacting protein 15) (TRIP-15)	1400	0.74	170	223	Ambiguous	Both	Thakar&Karaca	51.596		D.C.	1619
DNJC7_HUMAN	DnaJ homolog subfamily C member 7 (Tetratricopeptide repeat protein 2) (TPR repeat protein 2)	1400	0.74	170	226	Ambiguous	Both		56.44		D.C.	3609
TRM7_HUMAN	Putative tRNA (cytidine(32)/guanosine(34)-2'-O)-methyltransferase (EC 2.1.1.205) (2'-O-ribose RNA methyltransferase TRM7 homolog) (Protein ftsJ homolog 1)	330	0.74	40	54.7	Ambiguous	Cytoplasm		35.867		D.C.	4398
SBNO1_HUMAN	Protein strawberry notch homolog 1 (Monocyte protein 3) (MOP-3)	300	0.74	36	49	Ambiguous			154.18		D.C.	10
SKP2_HUMAN	S-phase kinase-associated protein 2 (Cyclin-A/CDK2-associated protein p45) (F-box protein Skp2) (F-box/LRR-repeat protein 1) (p45skp2)	68	0.74	8.3	11.1	Ambiguous	Both		47.76		D.C.	1988
KCAB2_HUMAN	Voltage-gated potassium channel subunit beta-2 (K(+) channel subunit beta-2) (Kv-beta-2) (hKvbeta2)	25	0.74	3	4.09	Ambiguous	Cytoplasm		33.656		D.C.	1987
ITCH_HUMAN	E3 ubiquitin-protein ligase Itchy homolog (Itch) (EC 6.3.2.-) (Atrophin-1-interacting protein 4) (AIP4) (NFE2-associated polypeptide 1) (NAPP1)	1.8	0.74	0.22	0.289	Ambiguous	Both		86.497		D.C.	3480
PDE2A_HUMAN	cGMP-dependent 3',5'-cyclic phosphodiesterase (EC 3.1.4.17) (Cyclic GMP-stimulated phosphodiesterase) (CGS-PDE) (cGSPDE)	1.5	0.74	0.19	0.252	Ambiguous	Cytoplasm		104.95		D.C.	143
BAG2_HUMAN	BAG family molecular chaperone regulator 2 (BAG-2) (Bcl-2-associated athanogene 2)	850	0.73	100	142	Ambiguous			23.772		D.C.	645
CKAP5_HUMAN	Cytoskeleton-associated protein 5 (Colonic and hepatic tumor overexpressed gene protein) (Ch-TOG)	420	0.73	51	70.2	Ambiguous	Cytoplasm		218.52		D.C.	2067
DNJB4_HUMAN	DnaJ homolog subfamily B member 4 (Heat shock 40 kDa protein 1 homolog) (HSP40 homolog) (Heat shock protein 40 homolog) (Human liver DnaJ-like protein)	310	0.73	38	51.3	Ambiguous	Cytoplasm		37.806		D.C.	4394
OSB11_HUMAN	Oxysterol-binding protein-related protein 11 (ORP-11) (OSBP-related protein 11)	90	0.73	11	15	Ambiguous	Cytoplasm		83.642		D.C.	3774
LRC42_HUMAN	Leucine-rich repeat-containing protein 42	7.1	0.73	0.87	1.19	Ambiguous			48.571		D.C.	4731
TPM2_HUMAN	Tropomyosin beta chain (Beta-tropomyosin) (Tropomyosin-2)	3500	0.72	420	591	Ambiguous	Cytoplasm		32.989		D.C.	772
1433F_HUMAN	14-3-3 protein eta (Protein AS1)	2700	0.72	330	455	Ambiguous		BioGrid	28.218		D.C.	1846
CMS1_HUMAN	Protein CMSS1 (Cms1 ribosomal small subunit homolog)	90	0.72	11	15.2	Ambiguous			29.964		D.C.	3648
ATG2B_HUMAN	Autophagy-related protein 2 homolog B	67	0.72	8.2	11.4	Ambiguous	Cytoplasm		232.76		D.C.	3357
VPS51_HUMAN	Vacuolar protein sorting-associated protein 51 homolog (Another new gene 2 protein) (Protein fat-free homolog)	58	0.72	7.1	9.86	Ambiguous	Cytoplasm		86.041		D.C.	4445
ACBD5_HUMAN	Acyl-CoA-binding domain-containing protein 5	49	0.72	6	8.28	Ambiguous	Cytoplasm		46.268	TM	D.C.	2458
CPSF1_HUMAN	Cleavage and polyadenylation specificity factor subunit 1 (Cleavage and polyadenylation specificity factor 160 kDa subunit) (CPSF 160 kDa subunit)	22	0.72	2.7	3.82	Ambiguous	Nucleus		160.88		D.C.	1915
SOGA1_HUMAN	Protein SOGA1 (SOGA family member 1) (Suppressor of glucose by autophagy) (Suppressor of glucose, autophagy-associated protein 1) [Cleaved into: N-terminal form; C-terminal 80 kDa form (80-kDa SOGA fragment)]	6.7	0.72	0.82	1.14	Ambiguous	Other		183.86		D.C.	560
HNRPF_HUMAN	Heterogeneous nuclear ribonucleoprotein F (hnRNP F) (Nucleolin-like protein mcs94-1) [Cleaved into: Heterogeneous nuclear ribonucleoprotein F, N-terminally processed]	140	0.71	18	24.8	Ambiguous	Nucleus		45.671		D.C.	1489
DHX36_HUMAN	ATP-dependent RNA helicase DHX36 (EC 3.6.4.12) (EC 3.6.4.13) (DEAH box protein 36) (G4-resolvase 1) (G4R1) (MLE-like protein 1) (RNA helicase associated with AU-rich element ARE)	32	0.71	3.9	5.52	Ambiguous	Both		113.15		D.C.	3911
STRP1_HUMAN	Striatin-interacting protein 1 (Protein FAM40A)	120	0.7	15	20.7	Ambiguous	Cytoplasm		95.575		D.C.	2478
TAF7_HUMAN	Transcription initiation factor TFIID subunit 7 (RNA polymerase II TBP-associated factor subunit F) (Transcription initiation factor TFIID 55 kDa subunit) (TAF(II)55) (TAFII-55) (TAFII55)	25	0.7	3.1	4.44	Ambiguous	Nucleus		40.259		D.C.	2237
EFHD2_HUMAN	EF-hand domain-containing protein D2 (Swiprosin-1)	4100	0.69	500	724	Ambiguous	Cytoplasm		26.697		D.C.	3359
TNG6_HUMAN	Transport and Golgi organization protein 6 homolog (Transmembrane and coiled-coil domain-containing protein 7)	66	0.69	8.1	11.7	Ambiguous	Cytoplasm		120.75	TM	D.C.	3826
RFC5_HUMAN	Replication factor C subunit 5 (Activator 1 36 kDa subunit) (A1 36 kDa subunit) (Activator 1 subunit 5) (Replication factor C 36 kDa subunit) (RF-C 36 kDa subunit) (RFC36)	380	0.68	47	69.2	Ambiguous	Nucleus		38.496		D.C.	1257
PRI1_HUMAN	DNA primase small subunit (EC 2.7.7.-) (DNA primase 49 kDa subunit) (p49)	370	0.68	45	66.6	Ambiguous			49.901		D.C.	1394
RN126_HUMAN	E3 ubiquitin-protein ligase RNF126 (EC 6.3.2.-) (RING finger protein 126)	230	0.68	29	42.5	Ambiguous	Both		33.861		D.C.	3737
ZWINT_HUMAN	ZW10 interactor (ZW10-interacting protein 1) (Zwint-1)	100	0.68	12	18.3	Ambiguous	Nucleus		31.293		D.C.	582
EXOC4_HUMAN	Exocyst complex component 4 (Exocyst complex component Sec8)	57	0.68	7	10.3	Ambiguous			110.5		D.C.	3324
IF4A3_HUMAN	Eukaryotic initiation factor 4A-III (eIF-4A-III) (eIF4A-III) (EC 3.6.4.13) (ATP-dependent RNA helicase DDX48) (ATP-dependent RNA helicase eIF4A-3) (DEAD box protein 48) (Eukaryotic initiation factor 4A-like NUK-34) (Eukaryotic translation initiation factor 4A isoform 3) (Nuclear matrix protein 265) (NMP 265) (hNMP 265) [Cleaved into: Eukaryotic initiation factor 4A-III, N-terminally processed]	210	0.67	68	102	Ambiguous	Both		46.871		D.C.	1235
CPSM_HUMAN	Carbamoyl-phosphate synthase [ammonia], mitochondrial (EC 6.3.4.16) (Carbamoyl-phosphate synthetase I) (CPSase I)	760	0.67	60	89.9	Ambiguous	Both		164.94	MT	D.C.	1139
TLE3_HUMAN	Transducin-like enhancer protein 3 (Enhancer of split groucho-like protein 3) (ESG3)	39	0.67	4.8	7.2	Ambiguous	Nucleus		82.221		D.C.	1842
AKA10_HUMAN	A-kinase anchor protein 10, mitochondrial (AKAP-10) (Dual specificity A kinase-anchoring protein 2) (D-AKAP-2) (Protein kinase A-anchoring protein 10) (PRKA10)	10	0.67	1.3	1.87	Ambiguous	Cytoplasm		73.817	MT	D.C.	326
VPS11_HUMAN	Vacuolar protein sorting-associated protein 11 homolog (hVPS11) (RING finger protein 108)	3.6	0.67	0.44	0.66	Ambiguous	Cytoplasm		107.84		D.C.	3898
SF3B3_HUMAN	Splicing factor 3B subunit 3 (Pre-mRNA-splicing factor SF3b 130 kDa subunit) (SF3b130) (STAF130) (Spliceosome-associated protein 130) (SAP 130)	75	0.66	100	158	Ambiguous	Nucleus		135.58		D.C.	2219
STK26_HUMAN	Serine/threonine-protein kinase 26 (EC 2.7.11.1) (MST3 and SOK1-related kinase) (Mammalian STE20-like protein kinase 4) (MST-4) (STE20-like kinase MST4) (Serine/threonine-protein kinase MASK)	810	0.66	99	151	Ambiguous	Cytoplasm		46.528		D.C.	4345
F262_HUMAN	6-phosphofructo-2-kinase/fructose-2,6-bisphosphatase 2 (6PF-2-K/Fru-2,6-P2ase 2) (PFK/FBPase 2) (6PF-2-K/Fru-2,6-P2ase heart-type isozyme) [Includes: 6-phosphofructo-2-kinase (EC 2.7.1.105); Fructose-2,6-bisphosphatase (EC 3.1.3.46)]	240	0.66	29	43.9	Ambiguous			58.476		D.C.	418
MET2B_HUMAN	Methyltransferase-like protein 2B (EC 2.1.1.-)	170	0.66	21	31.8	Ambiguous			43.426		D.C.	2575
URGCP_HUMAN	Up-regulator of cell proliferation (HBV X protein up-regulated gene 4 protein) (HBxAg up-regulated gene 4 protein)	89	0.66	11	16.6	Ambiguous	Both		104.99		D.C.	3119
[truncated: 2,412 more rows]

## Sheet: Extended table
		Binding to CRM1													UniProt Data										Mapping to human protein complex databases		Output from MaxQuant
UniProtLink	Protein name	RanGTP Stimulation	Enrichment from input	CRM1 %	Molar Fraction in CRM1+RanGTP (×10^6)	Molar Fraction in Input (×10^6)	Category	Simplified Localization UniProt	Reported CRM1 interactions	Mw (kDa)	FLAGS	Sorting	id	Mass (Isoform)	Status	Gene names	Mass	Features	Function [CC]	CR (KO)	CR (GeneTree)	Function [CC]	Subcellular location [CC]	Entry	CORUM Complexes	Soluble Complexes	Fasta headers	Mol. weight [kDa]	iBAQ CRM1 w/o Ran	iBAQ CRM1+RanGTP	iBAQ Input	RanGTP Stimulation	CRM1 percentage (%100)	Input percentange ( %100)	Enrichment from input	MS/MS Count	id	Protein IDs
RN146_HUMAN	E3 ubiquitin-protein ligase RNF146 (EC 6.3.2.-) (Dactylidin) (Iduna) (RING finger protein 146)	3400	2500	0.042	420	0.0437	Cargo A	Both		38.818		A1	4170	38.818	reviewed	RNF146	632.82	Alternative sequence (1); Beta strand (12); Binding site (7); Chain (1); Cross-link (4); Domain (1); Helix (3); Mutagenesis (10); Natural variant (1); Sequence conflict (6); Turn (2); Zinc finger (1)	E3 ubiquitin-protein ligase that specifically binds poly-ADP-ribosylated (PARsylated) proteins and mediates their ubiquitination and subsequent degradation. May regulate many important biological processes, such as cell survival and DNA damage response. Acts as an activator of the Wnt signaling pathway by mediating the ubiquitination of PARsylated AXIN1 and AXIN2, 2 key components of the beta-cat…	K15700;	ENSGT00390000000358;	E3 ubiquitin-protein ligase that specifically binds poly-ADP-ribosylated (PARsylated) proteins and mediates their ubiquitination and subsequent degradation. May regulate many important biological processes, such as cell survival and DNA damage response. Acts as an activator of the Wnt signaling pathway by mediating the ubiquitination of PARsylated AXIN1 and AXIN2, 2 key components of the beta-cat…	Cytoplasm, cytosol. Nucleus. Note=Translocates to the nucleus after DNA damage, such as laser-induced DNA breaks, and concentrates at DNA breaks. This translocation requires PARP1 activation and PAR-binding.	Q9NTX7			>sp|Q9NTX7-2|RN146_HUMAN Isoform 2 of E3 ubiquitin-protein ligase RNF146 OS=Homo sapiens GN=RNF146;>sp|Q9NTX7|RN146_HUMAN E3 ubiquitin-protein ligase RNF146 OS=Homo sapiens GN=RNF146 PE=1 SV=1	38.818	20000	67956000	42000	3400	0.0415281	4.37e-06	9510	26	4170	Q9NTX7-2;Q9NTX7
TFEB_HUMAN	Transcription factor EB (Class E basic helix-loop-helix protein 35) (bHLHe35)	2800	2500	0.034	340	0.0437	Cargo A	Both		52.864		A1	958	52.864	reviewed	TFEB BHLHE35	61.52	Alternative sequence (1); Chain (1); Compositional bias (3); Domain (1); Erroneous initiation (2); Modified residue (6); Region (2); Sequence conflict (3)	Transcription factor that specifically recognizes and binds E-box sequences (5'-CANNTG-3'). Efficient DNA-binding requires dimerization with itself or with another MiT/TFE family member such as TFE3 or MITF. In association with TFE3, activates the expression of CD40L in T-cells, thereby playing a role in T-cell-dependent antibody responses in activated CD4(+) T-cells and thymus-dependent humoral …	K15590;	ENSGT00390000004402;	Transcription factor that specifically recognizes and binds E-box sequences (5'-CANNTG-3'). Efficient DNA-binding requires dimerization with itself or with another MiT/TFE family member such as TFE3 or MITF. In association with TFE3, activates the expression of CD40L in T-cells, thereby playing a role in T-cell-dependent antibody responses in activated CD4(+) T-cells and thymus-dependent humoral …	Cytoplasm. Nucleus. Note=Mainly present in the cytoplasm. Under aberrant lysosomal storage conditions, it translocates from the cytoplasm to the nucleus.	P19484			>sp|P19484|TFEB_HUMAN Transcription factor EB OS=Homo sapiens GN=TFEB PE=1 SV=3;>sp|P19484-2|TFEB_HUMAN Isoform 2 of Transcription factor EB OS=Homo sapiens GN=TFEB	52.864	20000	55154000	42000	2760	0.0337047	4.37e-06	7710	34	958	P19484;P19484-2
WIBG_HUMAN	Partner of Y14 and mago (Protein wibg homolog)	2600	2500	0.032	320	0.0437	Cargo A	Both	Thakar&Karaca	22.655		A1	3675	22.655	reviewed	WIBG PYM	32.58	Alternative sequence (1); Chain (1); Coiled coil (2); Modified residue (4); Natural variant (1); Region (2); Sequence conflict (1)	Key regulator of the exon junction complex (EJC), a multiprotein complex that associates immediately upstream of the exon-exon junction on mRNAs and serves as a positional landmarks for the intron exon structure of genes and directs post-transcriptional processes in the cytoplasm such as mRNA export, nonsense-mediated mRNA decay (NMD) or translation. Acts as a EJC disassembly factor, allowing tra…	K14294;	ENSGT00730000111107;	Key regulator of the exon junction complex (EJC), a multiprotein complex that associates immediately upstream of the exon-exon junction on mRNAs and serves as a positional landmarks for the intron exon structure of genes and directs post-transcriptional processes in the cytoplasm such as mRNA export, nonsense-mediated mRNA decay (NMD) or translation. Acts as a EJC disassembly factor, allowing tra…	Cytoplasm. Nucleus, nucleolus. Nucleus, nucleoplasm. Note=Shuttles between the nucleus and the cytoplasm. Nuclear export is mediated by XPO1/CRM1.	Q9BRP8	2_"(E.F.G)_complex::12S_U11_snRNP::6S_methyltransferase_and_RG-containing_Sm_proteins_complex::20S_methylosome-SmD_complex::20S_methylosome_and_RG-containing_Sm_protein_complex::6S_methyltransferase_complex::JBP1-pICln_complex::SMN_complex,_U7_snRNA_specific::20S_methyltransferase_complex::AR_coactivator_complex::17S_U2_snRNP::SF3A1-SF3A2-SF3A3_complex::SF3b_complex::Exon_junction_complex::SRm160…	244_C_244;	>sp|Q9BRP8|WIBG_HUMAN Partner of Y14 and mago OS=Homo sapiens GN=WIBG PE=1 SV=1	22.655	20000	52449000	42000	2620	0.0320517	4.37e-06	7340	20	3675	Q9BRP8
CA198_HUMAN	Uncharacterized protein C1orf198	2400	2500	0.029	290	0.0437	Cargo A	Cytoplasm		36.346		A1	3926	36.346	reviewed	C1orf198	27.94	Alternative sequence (2); Chain (1); Initiator methionine (1); Modified residue (2); Natural variant (2); Sequence conflict (1)			ENSGT00390000018361;		Cytoplasm {ECO:0000269|PubMed:22361696}.	Q9H425			>sp|Q9H425|CA198_HUMAN Uncharacterized protein C1orf198 OS=Homo sapiens GN=C1orf198 PE=1 SV=1;>sp|Q9H425-3|CA198_HUMAN Isoform 3 of Uncharacterized protein C1orf198 OS=Homo sapiens GN=C1orf198;>sp|Q9H425-2|CA198_HUMAN Isoform 2 of Uncharacterized protein C	36.346	20000	47184000	42000	2360	0.0288342	4.37e-06	6600	43	3926	Q9H425;Q9H425-3;Q9H425-2
SEP10_HUMAN	Septin-10	2400	2500	0.029	290	0.0437	Cargo A	Both		50.065		A1	4323	50.065	reviewed	2015-09-10	35.81	Alternative sequence (2); Binding site (3); Chain (1); Domain (1); Frameshift (2); Natural variant (1); Nucleotide binding (2)	Filament-forming cytoskeletal GTPase. May play a role in cytokinesis (Potential). {ECO:0000305}.	K16940;	ENSGT00760000118899;	Filament-forming cytoskeletal GTPase. May play a role in cytokinesis (Potential). {ECO:0000305}.	Cytoplasm {ECO:0000269|PubMed:12711328}. Cytoplasm, cytoskeleton {ECO:0000250}. Note=Using a GFP-fusion protein, detected in the nucleus. {ECO:0000269|PubMed:12711328}.	Q9P0V9		129_C_129;	>sp|Q9P0V9-3|SEP10_HUMAN Isoform 3 of Septin-10 OS=Homo sapiens GN=SEPT10;>sp|Q9P0V9|SEP10_HUMAN Septin-10 OS=Homo sapiens GN=SEPT10 PE=1 SV=2;>sp|Q9P0V9-2|SEP10_HUMAN Isoform 2 of Septin-10 OS=Homo sapiens GN=SEPT10	50.065	20000	47557000	42000	2380	0.0290622	4.37e-06	6650	37	4323	Q9P0V9-3;Q9P0V9;Q9P0V9-2
RCN2_HUMAN	Reticulocalbin-2 (Calcium-binding protein ERC-55) (E6-binding protein) (E6BP)	2300	2500	0.028	280	0.0437	Cargo A	Cytoplasm	BioGrid	36.876	ER	A1	2101	36.876	reviewed	RCN2 ERC55	115.88	Alternative sequence (1); Calcium binding (6); Chain (1); Domain (6); Motif (1); Signal peptide (1)	Not known. Binds calcium.		ENSGT00550000074546;	Not known. Binds calcium.	Endoplasmic reticulum lumen.	Q14257		284_C_284;	>sp|Q14257|RCN2_HUMAN Reticulocalbin-2 OS=Homo sapiens GN=RCN2 PE=1 SV=1	36.876	20000	46547000	42000	2330	0.028445	4.37e-06	6510	25	2101	Q14257
CCNB1_HUMAN	G2/mitotic-specific cyclin-B1	2200	2500	0.027	270	0.0437	Cargo A	Both	NESdbH, NESdbO, Thakar&Karaca	48.337		A1	890	48.337	reviewed	CCNB1 CCNB	22.76	Alternative sequence (1); Beta strand (3); Chain (1); Compositional bias (1); Helix (18); Modified residue (6); Mutagenesis (2); Region (2); Sequence conflict (2); Turn (3)	Essential for the control of the cell cycle at the G2/M (mitosis) transition. {ECO:0000269|PubMed:17495531, ECO:0000269|PubMed:17495533}.	K05868;	ENSGT00760000118939;	Essential for the control of the cell cycle at the G2/M (mitosis) transition. {ECO:0000269|PubMed:17495531, ECO:0000269|PubMed:17495533}.	Cytoplasm. Nucleus. Cytoplasm, cytoskeleton, microtubule organizing center, centrosome.	P14635	57_BRD4-RFC_complex::RFC_complex::RFC_complex_(activator_A_1_complex)::RC_complex_(Replication_competent_complex)::CDC2-CCNA2-CDK2_complex::RC_complex_during_G2/M-phase_of_cell_cycle::RC_complex_during_S-phase_of_cell_cycle::CDC2-CCNB1-CCNF_complex::CDC2-CCNB1-PTCH1_complex::RalBP1-CDC2-CCNB1_complex;69_CDC2-PCNA-CCNB1-GADD45A_complex::CDC2-PCNA-CCNB1-GADD45B_complex::CDC2-PCNA-CCNB1-GADD45G_comp…	324_C_324;	>sp|P14635|CCNB1_HUMAN G2/mitotic-specific cyclin-B1 OS=Homo sapiens GN=CCNB1 PE=1 SV=1;>sp|P14635-2|CCNB1_HUMAN Isoform 2 of G2/mitotic-specific cyclin-B1 OS=Homo sapiens GN=CCNB1	48.337	20000	44608000	42000	2230	0.0272601	4.37e-06	6240	23	890	P14635;P14635-2
GRL1A_HUMAN	DNA-directed RNA polymerase II subunit GRINL1A (DNA-directed RNA polymerase II subunit M) (Glutamate receptor-like protein 1A)	2100	2500	0.026	260	0.0437	Cargo A	Nucleus		40.733		A1	815	40.733	reviewed	POLR2M GRINL1A	41.85	Alternative sequence (2); Chain (1); Coiled coil (1); Sequence conflict (1)	Isoform 1 appears to be a stable component of the Pol II(G) complex form of RNA polymerase II (Pol II). Pol II synthesizes mRNA precursors and many functional non-coding RNAs and is the central component of the basal RNA polymerase II transcription machinery. Isoform 1 may play a role in the Mediator complex-dependent regulation of transcription activation. Isoform 1 acts in vitro as a negative r…		ENSGT00530000063232;	Isoform 1 appears to be a stable component of the Pol II(G) complex form of RNA polymerase II (Pol II). Pol II synthesizes mRNA precursors and many functional non-coding RNAs and is the central component of the basal RNA polymerase II transcription machinery. Isoform 1 may play a role in the Mediator complex-dependent regulation of transcription activation. Isoform 1 acts in vitro as a negative r…	Isoform 1: Nucleus {ECO:0000305}.	P0CAP2			>sp|P0CAP2-3|GRL1A_HUMAN Isoform 3 of DNA-directed RNA polymerase II subunit GRINL1A OS=Homo sapiens GN=POLR2M;>sp|P0CAP2|GRL1A_HUMAN DNA-directed RNA polymerase II subunit GRINL1A OS=Homo sapiens GN=POLR2M PE=1 SV=1;>sp|Q9BZD3|GCOM2_HUMAN Putative GRINL1B	40.733	20000	42073000	42000	2100	0.0257109	4.37e-06	5880	47	815	P0CAP2-3;P0CAP2;Q9BZD3;P0CAP2-2
DRG1_HUMAN	Developmentally-regulated GTP-binding protein 1 (DRG-1) (Neural precursor cell expressed developmentally down-regulated protein 3) (NEDD-3)	1900	2500	0.024	240	0.0437	Cargo A	Cytoplasm		40.542		A1	4609	40.542	reviewed	DRG1 NEDD3	128.79	Beta strand (7); Chain (1); Compositional bias (1); Domain (1); Helix (1); Initiator methionine (1); Modified residue (2); Nucleotide binding (3); Region (1); Sequence conflict (1); Turn (1)	Critical regulator of cell growth under specific conditions. Implicated in differentiation and cell cycle arrest.		ENSGT00550000075013;	Critical regulator of cell growth under specific conditions. Implicated in differentiation and cell cycle arrest.	Cytoplasm {ECO:0000269|PubMed:15676025, ECO:0000269|PubMed:19819225}. Note=The DRG1-DFRP2/ZC3H15 complex associates with polysomes.	Q9Y295			>sp|Q9Y295|DRG1_HUMAN Developmentally-regulated GTP-binding protein 1 OS=Homo sapiens GN=DRG1 PE=1 SV=1	40.542	20000	38559000	42000	1930	0.0235635	4.37e-06	5390	40	4609	Q9Y295
WEE1_HUMAN	Wee1-like protein kinase (WEE1hu) (EC 2.7.10.2) (Wee1A kinase)	1900	2500	0.024	240	0.0437	Cargo A	Nucleus	NESdbH	71.597		A1	1119	71.597	reviewed	WEE1	64.99	Active site (1); Alternative sequence (1); Beta strand (9); Binding site (1); Chain (1); Compositional bias (2); Domain (1); Helix (14); Metal binding (2); Modified residue (9); Mutagenesis (5); Natural variant (2); Nucleotide binding (1); Sequence conflict (1); Turn (1)	Acts as a negative regulator of entry into mitosis (G2 to M transition) by protecting the nucleus from cytoplasmically activated cyclin B1-complexed CDK1 before the onset of mitosis by mediating phosphorylation of CDK1 on 'Tyr-15'. Specifically phosphorylates and inactivates cyclin B1-complexed CDK1 reaching a maximum during G2 phase and a minimum as cells enter M phase. Phosphorylation of cyclin…	K06632;	ENSGT00530000063230;	Acts as a negative regulator of entry into mitosis (G2 to M transition) by protecting the nucleus from cytoplasmically activated cyclin B1-complexed CDK1 before the onset of mitosis by mediating phosphorylation of CDK1 on 'Tyr-15'. Specifically phosphorylates and inactivates cyclin B1-complexed CDK1 reaching a maximum during G2 phase and a minimum as cells enter M phase. Phosphorylation of cyclin…	Nucleus.	P30291	266_"SCF_subcomplex_(WEE1,_SKP2,_BTRC)";		>sp|P30291|WEE1_HUMAN Wee1-like protein kinase OS=Homo sapiens GN=WEE1 PE=1 SV=2;>sp|P30291-2|WEE1_HUMAN Isoform 2 of Wee1-like protein kinase OS=Homo sapiens GN=WEE1	71.597	20000	38588000	42000	1930	0.0235812	4.37e-06	5400	60	1119	P30291;P30291-2
TFCP2_HUMAN	Alpha-globin transcription factor CP2 (SAA3 enhancer factor) (Transcription factor LSF)	1800	2500	0.023	230	0.0437	Cargo A	Nucleus	Thakar&Karaca	57.255		A1	1923	57.255	reviewed	TFCP2 LSF SEF	338.26	Alternative sequence (2); Chain (1); Compositional bias (2); Mutagenesis (4); Region (1); Sequence conflict (5)	Binds a variety of cellular and viral promoters including fibrinogen, alpha-globin, SV40 and HIV-1 promoters. Activation of the alpha-globin promoter in erythroid cells is via synergistic interaction with UBP1 (By similarity). Functions as part of the SSP (stage selector protein) complex. Facilitates the interaction of the gamma-globin genes with enhancer elements contained in the locus control r…	K09275;	ENSGT00760000119235;	Binds a variety of cellular and viral promoters including fibrinogen, alpha-globin, SV40 and HIV-1 promoters. Activation of the alpha-globin promoter in erythroid cells is via synergistic interaction with UBP1 (By similarity). Functions as part of the SSP (stage selector protein) complex. Facilitates the interaction of the gamma-globin genes with enhancer elements contained in the locus control r…	Nucleus {ECO:0000269|PubMed:1732747, ECO:0000269|PubMed:7828600, ECO:0000269|PubMed:8114710}.	Q12800			>sp|Q12800|TFCP2_HUMAN Alpha-globin transcription factor CP2 OS=Homo sapiens GN=TFCP2 PE=1 SV=2;>sp|Q12800-3|TFCP2_HUMAN Isoform 3 of Alpha-globin transcription factor CP2 OS=Homo sapiens GN=TFCP2;>sp|Q12800-4|TFCP2_HUMAN Isoform 4 of Alpha-globin transcri	57.255	20000	36942000	42000	1850	0.0225753	4.37e-06	5170	38	1923	Q12800;Q12800-3;Q12800-4;Q12800-2;Q9NZI6
HAUS7_HUMAN	HAUS augmin-like complex subunit 7 (26S proteasome-associated UCH37-interacting protein 1) (UCHL5-interacting protein) (X-linked protein STS1769)	1700	2500	0.021	210	0.0437	Cargo A	Cytoplasm		37.524		A1	3630	37.524	reviewed	HAUS7 UCHL5IP UIP1	38.78	Alternative sequence (3); Chain (1); Coiled coil (1); Erroneous initiation (2); Frameshift (1); Modified residue (1); Sequence caution (1)	Contributes to mitotic spindle assembly, maintenance of centrosome integrity and completion of cytokinesis as part of the HAUS augmin-like complex. {ECO:0000269|PubMed:19369198, ECO:0000269|PubMed:19427217}.	K16590;	ENSGT00390000003937;	Contributes to mitotic spindle assembly, maintenance of centrosome integrity and completion of cytokinesis as part of the HAUS augmin-like complex. {ECO:0000269|PubMed:19369198, ECO:0000269|PubMed:19427217}.	Cytoplasm, cytoskeleton, microtubule organizing center, centrosome. Cytoplasm, cytoskeleton, spindle. Note=Localizes to interphase centrosomes and to mitotic spindle microtubules.	Q99871		514_C_514;	>sp|Q99871-3|HAUS7_HUMAN Isoform 3 of HAUS augmin-like complex subunit 7 OS=Homo sapiens GN=HAUS7;>sp|Q99871|HAUS7_HUMAN HAUS augmin-like complex subunit 7 OS=Homo sapiens GN=HAUS7 PE=1 SV=3;>sp|Q99871-2|HAUS7_HUMAN Isoform 2 of HAUS augmin-like complex su	37.524	20000	33823000	42000	1690	0.0206693	4.37e-06	4730	21	3630	Q99871-3;Q99871;Q99871-2
PDLI7_HUMAN	PDZ and LIM domain protein 7 (LIM mineralization protein) (LMP) (Protein enigma)	1700	2500	0.021	210	0.0437	Cargo A	Cytoplasm		49.844		A1	4112	49.844	reviewed	PDLIM7 ENIGMA	27.13	Alternative sequence (8); Beta strand (5); Chain (1); Domain (4); Frameshift (1); Helix (4); Modified residue (1); Mutagenesis (2); Natural variant (2); Sequence conflict (1)	May function as a scaffold on which the coordinated assembly of proteins can occur. May play a role as an adapter that, via its PDZ domain, localizes LIM-binding proteins to actin filaments of both skeletal muscle and nonmuscle tissues. Involved in both of the two fundamental mechanisms of bone formation, direct bone formation (e.g. embryonic flat bones mandible and cranium), and endochondral bon…		ENSGT00760000118910;	May function as a scaffold on which the coordinated assembly of proteins can occur. May play a role as an adapter that, via its PDZ domain, localizes LIM-binding proteins to actin filaments of both skeletal muscle and nonmuscle tissues. Involved in both of the two fundamental mechanisms of bone formation, direct bone formation (e.g. embryonic flat bones mandible and cranium), and endochondral bon…	Cytoplasm {ECO:0000250}. Cytoplasm, cytoskeleton {ECO:0000250}. Note=Colocalizes with RET to the cell periphery and in some cytoskeletal components. Colocalizes with TPM2 near the Z line in muscle. Colocalizes with TBX4 and TBX5 to actin filaments (By similarity). {ECO:0000250}.	Q9NR12		564_C_564;	>sp|Q9NR12|PDLI7_HUMAN PDZ and LIM domain protein 7 OS=Homo sapiens GN=PDLIM7 PE=1 SV=1;>sp|Q9NR12-2|PDLI7_HUMAN Isoform 2 of PDZ and LIM domain protein 7 OS=Homo sapiens GN=PDLIM7;>sp|Q9NR12-5|PDLI7_HUMAN Isoform 5 of PDZ and LIM domain protein 7 OS=Homo	49.844	20000	34542000	42000	1730	0.0211087	4.37e-06	4830	35	4112	Q9NR12;Q9NR12-2;Q9NR12-5;Q9NR12-6;Q9NR12-4;Q9NR12-3
RIOK3_HUMAN	Serine/threonine-protein kinase RIO3 (EC 2.7.11.1) (RIO kinase 3) (sudD homolog)	1700	2500	0.021	210	0.0437	Cargo A			59.092		A1	193	59.092	reviewed	RIOK3 SUDD	31.32	Active site (1); Alternative sequence (1); Binding site (1); Chain (1); Domain (1); Modified residue (4); Natural variant (3); Nucleotide binding (1); Sequence conflict (1)		K08872;	ENSGT00390000004370;			O14730			>sp|O14730|RIOK3_HUMAN Serine/threonine-protein kinase RIO3 OS=Homo sapiens GN=RIOK3 PE=1 SV=2;>sp|O14730-2|RIOK3_HUMAN Isoform 2 of Serine/threonine-protein kinase RIO3 OS=Homo sapiens GN=RIOK3	59.092	20000	33829000	42000	1690	0.020673	4.37e-06	4730	36	193	O14730;O14730-2
RTN4_HUMAN	Reticulon-4 (Foocen) (Neurite outgrowth inhibitor) (Nogo protein) (Neuroendocrine-specific protein) (NSP) (Neuroendocrine-specific protein C homolog) (RTN-x) (Reticulon-5)	1700	2500	0.021	210	0.0437	Cargo A	Cytoplasm		40.317	TM	A1	4096	40.317	reviewed	RTN4 KIAA0886 NOGO My043 SP1507	36.9	Alternative sequence (6); Chain (1); Compositional bias (2); Domain (1); Erroneous initiation (2); Frameshift (2); Helix (4); Modified residue (10); Natural variant (4); Sequence conflict (4); Topological domain (3); Transmembrane (2); Turn (1)	Developmental neurite growth regulatory factor with a role as a negative regulator of axon-axon adhesion and growth, and as a facilitator of neurite branching. Regulates neurite fasciculation, branching and extension in the developing nervous system. Involved in down-regulation of growth, stabilization of wiring and restriction of plasticity in the adult CNS. Regulates the radial migration of cor…		ENSGT00390000009934;	Developmental neurite growth regulatory factor with a role as a negative regulator of axon-axon adhesion and growth, and as a facilitator of neurite branching. Regulates neurite fasciculation, branching and extension in the developing nervous system. Involved in down-regulation of growth, stabilization of wiring and restriction of plasticity in the adult CNS. Regulates the radial migration of cor…	Endoplasmic reticulum membrane; Multi-pass membrane protein. Note=Anchored to the membrane of the endoplasmic reticulum through 2 putative transmembrane domains.	Q9NQC3	220_Nogo-potassium_channel_complex;	381_C_381;549_C_549;	>sp|Q9NQC3-2|RTN4_HUMAN Isoform 2 of Reticulon-4 OS=Homo sapiens GN=RTN4;>sp|Q9NQC3-5|RTN4_HUMAN Isoform 5 of Reticulon-4 OS=Homo sapiens GN=RTN4;>sp|Q9NQC3|RTN4_HUMAN Reticulon-4 OS=Homo sapiens GN=RTN4 PE=1 SV=2;>sp|Q9NQC3-3|RTN4_HUMAN Isoform 3 of Retic	40.317	20000	34000000	42000	1700	0.0207775	4.37e-06	4760	15	4096	Q9NQC3-2;Q9NQC3-5;Q9NQC3;Q9NQC3-3;Q9NQC3-4;Q9NQC3-6
LST8_HUMAN	Target of rapamycin complex subunit LST8 (TORC subunit LST8) (G protein beta subunit-like) (Gable) (Protein GbetaL) (Mammalian lethal with SEC13 protein 8) (mLST8)	1500	2500	0.018	180	0.0437	Cargo A	Cytoplasm		35.876		A1	3743	35.876	reviewed	MLST8 GBL LST8	92.78	Alternative sequence (5); Beta strand (29); Chain (1); Erroneous gene model prediction (1); Helix (1); Modified residue (1); Mutagenesis (3); Repeat (7); Sequence conflict (3); Turn (4)	Subunit of both mTORC1 and mTORC2, which regulates cell growth and survival in response to nutrient and hormonal signals. mTORC1 is activated in response to growth factors or amino acids. Growth factor-stimulated mTORC1 activation involves a AKT1-mediated phosphorylation of TSC1-TSC2, which leads to the activation of the RHEB GTPase that potently activates the protein kinase activity of mTORC1. A…	K08266;	ENSGT00390000014795;	Subunit of both mTORC1 and mTORC2, which regulates cell growth and survival in response to nutrient and hormonal signals. mTORC1 is activated in response to growth factors or amino acids. Growth factor-stimulated mTORC1 activation involves a AKT1-mediated phosphorylation of TSC1-TSC2, which leads to the activation of the RHEB GTPase that potently activates the protein kinase activity of mTORC1. A…	Cytoplasm {ECO:0000250}.	Q9BVC4	251_"RAPTOR-mTOR_complex::mTOR-RAPTOR_complex::mTOR-signaling_complex_(FRAP1/mTOR,_GBL,_RAPTOR)::mTORC1_complex_(mTOR/FRAP1,_LST8,_RAPTOR)::RICTOR-mTOR_complex::mTOR-RICTOR_complex::mTORC2_complex_(mTOR/FRAP1,_LST8,_mAVO3/RICTOR)::mTORC2_complex_(mTOR/FRAP1,_LST8,_mAVO3/RICTOR,_SIN1)";		>sp|Q9BVC4|LST8_HUMAN Target of rapamycin complex subunit LST8 OS=Homo sapiens GN=MLST8 PE=1 SV=1;>sp|Q9BVC4-3|LST8_HUMAN Isoform 2 of Target of rapamycin complex subunit LST8 OS=Homo sapiens GN=MLST8;>sp|Q9BVC4-4|LST8_HUMAN Isoform 3 of Target of rapamyci	35.876	20000	30069000	42000	1500	0.0183752	4.37e-06	4210	17	3743	Q9BVC4;Q9BVC4-3;Q9BVC4-4
YAED1_HUMAN	Yae1 domain-containing protein 1	1400	2500	0.018	180	0.0437	Cargo A			25.299		A1	4133	25.299	reviewed	YAE1D1 C7orf36 GK003	169	Alternative sequence (2); Chain (1); Natural variant (1); Sequence conflict (3)			ENSGT00390000011176;			Q9NRH1			>sp|Q9NRH1|YAED1_HUMAN Yae1 domain-containing protein 1 OS=Homo sapiens GN=YAE1D1 PE=1 SV=1	25.299	20000	28728000	42000	1440	0.0175557	4.37e-06	4020	22	4133	Q9NRH1
APC7_HUMAN	Anaphase-promoting complex subunit 7 (APC7) (Cyclosome subunit 7)	1400	2500	0.017	170	0.0437	Cargo A			60.002		A1	4466	60.002	reviewed	ANAPC7 APC7	92.12	Alternative sequence (1); Chain (1); Erroneous translation (1); Helix (8); Modified residue (1); Mutagenesis (2); Repeat (10); Sequence conflict (3)	Component of the anaphase promoting complex/cyclosome (APC/C), a cell cycle-regulated E3 ubiquitin ligase that controls progression through mitosis and the G1 phase of the cell cycle. The APC/C complex acts by mediating ubiquitination and subsequent degradation of target proteins: it mainly mediates the formation of 'Lys-11'-linked polyubiquitin chains and, to a lower extent, the formation of 'Ly…	K03354;	ENSGT00390000005482;	Component of the anaphase promoting complex/cyclosome (APC/C), a cell cycle-regulated E3 ubiquitin ligase that controls progression through mitosis and the G1 phase of the cell cycle. The APC/C complex acts by mediating ubiquitination and subsequent degradation of target proteins: it mainly mediates the formation of 'Lys-11'-linked polyubiquitin chains and, to a lower extent, the formation of 'Ly…		Q9UJX3	32_"Anaphase-promoting_complex::Cell_division_cycle_complex_(CDC27,_CDC16,_ANAPC7)";	593_C_593;	>sp|Q9UJX3-2|APC7_HUMAN Isoform 2 of Anaphase-promoting complex subunit 7 OS=Homo sapiens GN=ANAPC7;>sp|Q9UJX3|APC7_HUMAN Anaphase-promoting complex subunit 7 OS=Homo sapiens GN=ANAPC7 PE=1 SV=4	60.002	20000	27721000	42000	1390	0.0169404	4.37e-06	3880	46	4466	Q9UJX3-2;Q9UJX3
AP3M2_HUMAN	AP-3 complex subunit mu-2 (Adaptor-related protein complex 3 subunit mu-2) (Clathrin assembly protein assembly protein complex 3 mu-2 medium chain) (Clathrin coat assembly protein AP47 homolog 2) (Clathrin coat-associated protein AP47 homolog 2) (Golgi adaptor AP-1 47 kDa protein homolog 2) (HA1 47 kDa subunit homolog 2) (Mu3B-adaptin) (P47B)	1300	2500	0.016	160	0.0437	Cargo A	Cytoplasm		46.977		A1	1519	46.977	reviewed	AP3M2	7	Alternative sequence (2); Chain (1); Domain (1)	Part of the AP-3 complex, an adaptor-related complex which is not clathrin-associated. The complex is associated with the Golgi region as well as more peripheral structures. It facilitates the budding of vesicles from the Golgi membrane and may be directly involved in trafficking to lysosomes. In concert with the BLOC-1 complex, AP-3 is required to target cargos into vesicles assembled at cell bo…	K12398;	ENSGT00530000062779;	Part of the AP-3 complex, an adaptor-related complex which is not clathrin-associated. The complex is associated with the Golgi region as well as more peripheral structures. It facilitates the budding of vesicles from the Golgi membrane and may be directly involved in trafficking to lysosomes. In concert with the BLOC-1 complex, AP-3 is required to target cargos into vesicles assembled at cell bo…	Golgi apparatus. Cytoplasmic vesicle membrane {ECO:0000250}; Peripheral membrane protein {ECO:0000250}; Cytoplasmic side {ECO:0000250}. Note=Component of the coat surrounding the cytoplasmic face of coated vesicles located at the Golgi complex. {ECO:0000250}.	P53677	18_AP3-BLOC1_complex::AP3_adapter_complex::BLOC-1_(biogenesis_of_lysosome-related_organelles_complex_1)::BLOC-2_(biogenesis_of_lysosome-related_organelles_complex_2)::BLOC1-BLOC2_complex;		>sp|P53677|AP3M2_HUMAN AP-3 complex subunit mu-2 OS=Homo sapiens GN=AP3M2 PE=1 SV=1	46.977	20000	25737000	42000	1290	0.0157279	4.37e-06	3600	26	1519	P53677
RAD18_HUMAN	E3 ubiquitin-protein ligase RAD18 (EC 6.3.2.-) (Postreplication repair protein RAD18) (hHR18) (hRAD18) (RING finger protein 73)	1300	2500	0.016	160	0.0437	Cargo A	Nucleus		56.222		A1	4153	56.222	reviewed	RAD18 RNF73	96.55	Beta strand (4); Chain (1); Domain (1); Helix (8); Modified residue (6); Motif (1); Mutagenesis (1); Natural variant (3); Sequence conflict (2); Turn (4); Zinc finger (2)	E3 ubiquitin-protein ligase involved in postreplication repair of UV-damaged DNA. Postreplication repair functions in gap-filling of a daughter strand on replication of damaged DNA. Associates to the E2 ubiquitin conjugating enzyme UBE2B to form the UBE2B-RAD18 ubiquitin ligase complex involved in mono-ubiquitination of DNA-associated PCNA on 'Lys-164'. Has ssDNA binding activity. {ECO:0000269|Pu…	K10627;	ENSGT00390000011230;	E3 ubiquitin-protein ligase involved in postreplication repair of UV-damaged DNA. Postreplication repair functions in gap-filling of a daughter strand on replication of damaged DNA. Associates to the E2 ubiquitin conjugating enzyme UBE2B to form the UBE2B-RAD18 ubiquitin ligase complex involved in mono-ubiquitination of DNA-associated PCNA on 'Lys-164'. Has ssDNA binding activity. {ECO:0000269|Pu…	Nucleus {ECO:0000250}.	Q9NS91			>sp|Q9NS91|RAD18_HUMAN E3 ubiquitin-protein ligase RAD18 OS=Homo sapiens GN=RAD18 PE=1 SV=2	56.222	20000	26669000	42000	1330	0.0162975	4.37e-06	3730	59	4153	Q9NS91
SDCG3_HUMAN	Serologically defined colon cancer antigen 3 (Antigen NY-CO-3)	1200	2500	0.015	150	0.0437	Cargo A	Cytoplasm		40.058		A1	3364	40.058	reviewed	SDCCAG3	26.41	Alternative sequence (3); Chain (1); Coiled coil (1); Erroneous gene model prediction (3); Erroneous initiation (1); Modified residue (2); Natural variant (5); Sequence conflict (2)	May be involved in modulation of TNF response. May be involved in presentation of TNFRSF1A on the cell surface (By similarity). {ECO:0000250}.		ENSGT00390000000560;	May be involved in modulation of TNF response. May be involved in presentation of TNFRSF1A on the cell surface (By similarity). {ECO:0000250}.	Cytoplasm {ECO:0000250}.	Q96C92			>sp|Q96C92-4|SDCG3_HUMAN Isoform 4 of Serologically defined colon cancer antigen 3 OS=Homo sapiens GN=SDCCAG3;>sp|Q96C92-2|SDCG3_HUMAN Isoform 2 of Serologically defined colon cancer antigen 3 OS=Homo sapiens GN=SDCCAG3;>sp|Q96C92|SDCG3_HUMAN Serologically	40.058	20000	24157000	42000	1210	0.0147624	4.37e-06	3380	20	3364	Q96C92-4;Q96C92-2;Q96C92;Q96C92-3
ABLM1_HUMAN	Actin-binding LIM protein 1 (abLIM-1) (Actin-binding LIM protein family member 1) (Actin-binding double zinc finger protein) (LIMAB1) (Limatin)	1200	2500	0.014	140	0.0437	Cargo A	Cytoplasm		81.12		A1	183	81.12	reviewed	ABLIM1 ABLIM KIAA0059 LIMAB1	87.69	Alternative sequence (6); Chain (1); Coiled coil (1); Domain (5); Erroneous initiation (1); Modified residue (13); Natural variant (2); Sequence conflict (4)	May act as scaffold protein (By similarity). May play a role in the development of the retina. Has been suggested to play a role in axon guidance. {ECO:0000250, ECO:0000269|PubMed:9245787}.	K07520;	ENSGT00760000119039;	May act as scaffold protein (By similarity). May play a role in the development of the retina. Has been suggested to play a role in axon guidance. {ECO:0000250, ECO:0000269|PubMed:9245787}.	Cytoplasm {ECO:0000250}. Cytoplasm, cytoskeleton {ECO:0000250}. Note=Associated with the cytoskeleton. {ECO:0000250}.	O14639			>sp|O14639-2|ABLM1_HUMAN Isoform 2 of Actin-binding LIM protein 1 OS=Homo sapiens GN=ABLIM1;>sp|O14639|ABLM1_HUMAN Actin-binding LIM protein 1 OS=Homo sapiens GN=ABLIM1 PE=1 SV=3	81.12	20000	23357000	42000	1170	0.0142735	4.37e-06	3270	54	183	O14639-2;O14639
FA53B_HUMAN	Protein FAM53B	1100	2500	0.014	140	0.0437	Cargo A			45.768		A1	2082	45.768	reviewed	FAM53B KIAA0140	114.54	Alternative sequence (2); Chain (1); Erroneous initiation (1); Modified residue (1); Sequence conflict (1)			ENSGT00530000063371;			Q14153			>sp|Q14153|FA53B_HUMAN Protein FAM53B OS=Homo sapiens GN=FAM53B PE=1 SV=2;>sp|Q14153-2|FA53B_HUMAN Isoform 2 of Protein FAM53B OS=Homo sapiens GN=FAM53B	45.768	20000	22773000	42000	1140	0.0139166	4.37e-06	3190	21	2082	Q14153;Q14153-2
P33MX_HUMAN	Putative monooxygenase p33MONOX (EC 1.-.-.-) (Brain-derived rescue factor p60MONOX) (Flavin monooxygenase motif-containing protein of 33 kDa)	1100	2500	0.014	140	0.0437	Cargo A	Cytoplasm		33.246		A1	3326	33.246	reviewed	KIAA1191 P33MONOX	77.86	Alternative sequence (2); Chain (1); Motif (1); Sequence conflict (4)	Potential NADPH-dependent oxidoreductase. May be involved in the regulation of neuronal survival, differentiation and axonal outgrowth.		ENSGT00390000000537;	Potential NADPH-dependent oxidoreductase. May be involved in the regulation of neuronal survival, differentiation and axonal outgrowth.	Cytoplasm {ECO:0000250}.	Q96A73			>sp|Q96A73|P33MX_HUMAN Putative monooxygenase p33MONOX OS=Homo sapiens GN=KIAA1191 PE=1 SV=1;>sp|Q96A73-2|P33MX_HUMAN Isoform 2 of Putative monooxygenase p33MONOX OS=Homo sapiens GN=KIAA1191	33.246	20000	22879000	42000	1140	0.0139814	4.37e-06	3200	31	3326	Q96A73;Q96A73-2;Q96A73-3
SPCS_HUMAN	O-phosphoseryl-tRNA(Sec) selenium transferase (EC 2.9.1.2) (Liver-pancreas antigen) (LP) (SLA-p35) (SLA/LP autoantigen) (Selenocysteine synthase) (Sec synthase) (Selenocysteinyl-tRNA(Sec) synthase) (Sep-tRNA:Sec-tRNA synthase) (SepSecS) (Soluble liver antigen) (SLA) (UGA suppressor tRNA-associated protein) (tRNA(Ser/Sec)-associated antigenic protein)	1100	2500	0.013	130	0.0437	Cargo A	Cytoplasm		55.726		A1	4070	55.726	reviewed	SEPSECS TRNP48	20.45	Alternative sequence (3); Beta strand (14); Binding site (8); Chain (1); Erroneous initiation (1); Erroneous translation (2); Frameshift (1); Helix (16); Modified residue (1); Mutagenesis (8); Natural variant (2); Region (3); Sequence conflict (7); Site (1); Turn (4)	Converts O-phosphoseryl-tRNA(Sec) to selenocysteinyl-tRNA(Sec) required for selenoprotein biosynthesis. {ECO:0000269|PubMed:17142313}.	K03341;	ENSGT00390000007332;	Converts O-phosphoseryl-tRNA(Sec) to selenocysteinyl-tRNA(Sec) required for selenoprotein biosynthesis. {ECO:0000269|PubMed:17142313}.	Cytoplasm.	Q9HD40			>sp|Q9HD40|SPCS_HUMAN O-phosphoseryl-tRNA(Sec) selenium transferase OS=Homo sapiens GN=SEPSECS PE=1 SV=2;>sp|Q9HD40-3|SPCS_HUMAN Isoform 3 of O-phosphoseryl-tRNA(Sec) selenium transferase OS=Homo sapiens GN=SEPSECS	55.726	20000	21633000	42000	1080	0.01322	4.37e-06	3030	21	4070	Q9HD40;Q9HD40-3;Q9HD40-2
FBX9_HUMAN	F-box only protein 9 (Cross-immune reaction antigen 1) (Renal carcinoma antigen NY-REN-57)	950	2500	0.012	120	0.0437	Cargo A	Cytoplasm		51.135		A1	4479	51.135	reviewed	FBXO9 FBX9 VCIA1	70.1	Alternative sequence (2); Chain (1); Domain (1); Modified residue (3); Repeat (1)	Substrate recognition component of a SCF (SKP1-CUL1-F-box protein) E3 ubiquitin-protein ligase complex which mediates the ubiquitination and subsequent proteasomal degradation of TTI1 and TELO2 in a CK2-dependent manner, thereby directly regulating mTOR signaling. SCF(FBXO9) recognizes and binds mTORC1-bound TTI1 and TELO2 when they are phosphorylated by CK2 following growth factor deprivation, l…	K10295;	ENSGT00390000014256;	Substrate recognition component of a SCF (SKP1-CUL1-F-box protein) E3 ubiquitin-protein ligase complex which mediates the ubiquitination and subsequent proteasomal degradation of TTI1 and TELO2 in a CK2-dependent manner, thereby directly regulating mTOR signaling. SCF(FBXO9) recognizes and binds mTORC1-bound TTI1 and TELO2 when they are phosphorylated by CK2 following growth factor deprivation, l…	Cytoplasm {ECO:0000269|PubMed:23263282}.	Q9UK97			>sp|Q9UK97-2|FBX9_HUMAN Isoform 2 of F-box only protein 9 OS=Homo sapiens GN=FBXO9;>sp|Q9UK97-3|FBX9_HUMAN Isoform 3 of F-box only protein 9 OS=Homo sapiens GN=FBXO9;>sp|Q9UK97|FBX9_HUMAN F-box only protein 9 OS=Homo sapiens GN=FBXO9 PE=1 SV=1	51.135	20000	18979000	42000	949	0.0115981	4.37e-06	2650	20	4479	Q9UK97-2;Q9UK97-3;Q9UK97
MKRN2_HUMAN	Probable E3 ubiquitin-protein ligase makorin-2 (EC 6.3.2.-) (RING finger protein 62)	1000	2500	0.012	120	0.0437	Cargo A			46.94		A1	3850	46.94	reviewed	MKRN2 RNF62 HSPC070	31.96	Alternative sequence (1); Chain (1); Natural variant (1); Region (1); Sequence conflict (3); Zinc finger (5)	E3 ubiquitin ligase catalyzing the covalent attachment of ubiquitin moieties onto substrate proteins. {ECO:0000250}.	K15687;	ENSGT00390000014093;	E3 ubiquitin ligase catalyzing the covalent attachment of ubiquitin moieties onto substrate proteins. {ECO:0000250}.		Q9H000			>sp|Q9H000|MKRN2_HUMAN Probable E3 ubiquitin-protein ligase makorin-2 OS=Homo sapiens GN=MKRN2 PE=1 SV=2	46.94	20000	20043000	42000	1000	0.0122483	4.37e-06	2800	21	3850	Q9H000
RIMKB_HUMAN	Beta-citrylglutamate synthase B (EC 6.3.1.17) (N-acetyl-aspartylglutamate synthetase B) (NAAG synthetase B) (NAAGS) (EC 6.3.2.41) (Ribosomal protein S6 modification-like protein B)	960	2500	0.012	120	0.0437	Cargo A	Cytoplasm		42.464		A1	4516	42.464	reviewed	RIMKLB FAM80B KIAA1238	115.48	Alternative sequence (2); Binding site (2); Chain (1); Domain (1); Erroneous initiation (1); Metal binding (4); Nucleotide binding (1)	Catalyzes the synthesis of beta-citryl-L-glutamate and N-acetyl-L-aspartyl-L-glutamate. Beta-citryl-L-glutamate is synthesized more efficiently than N-acetyl-L-aspartyl-L-glutamate (By similarity). {ECO:0000250}.	K18310;	ENSGT00390000014577;	Catalyzes the synthesis of beta-citryl-L-glutamate and N-acetyl-L-aspartyl-L-glutamate. Beta-citryl-L-glutamate is synthesized more efficiently than N-acetyl-L-aspartyl-L-glutamate (By similarity). {ECO:0000250}.	Cytoplasm {ECO:0000250}.	Q9ULI2			>sp|Q9ULI2|RIMKB_HUMAN Beta-citrylglutamate synthase B OS=Homo sapiens GN=RIMKLB PE=2 SV=2;>sp|Q9ULI2-2|RIMKB_HUMAN Isoform 2 of Beta-citrylglutamate synthase B OS=Homo sapiens GN=RIMKLB	42.464	20000	19293000	42000	965	0.01179	4.37e-06	2700	19	4516	Q9ULI2;Q9ULI2-2
TM1L2_HUMAN	TOM1-like protein 2 (Target of Myb-like protein 2)	950	2500	0.012	120	0.0437	Cargo A			55.556		A1	2665	55.556	reviewed	TOM1L2	79.79	Alternative sequence (5); Chain (1); Domain (2); Frameshift (1); Modified residue (2); Motif (1); Sequence conflict (8)	Probable role in protein transport. May regulate growth factor-induced mitogenic signaling. {ECO:0000269|PubMed:16412388, ECO:0000269|PubMed:16479011}.		ENSGT00700000104139;	Probable role in protein transport. May regulate growth factor-induced mitogenic signaling. {ECO:0000269|PubMed:16412388, ECO:0000269|PubMed:16479011}.		Q6ZVM7		614_C_614;	>sp|Q6ZVM7|TM1L2_HUMAN TOM1-like protein 2 OS=Homo sapiens GN=TOM1L2 PE=1 SV=1;>sp|Q6ZVM7-2|TM1L2_HUMAN Isoform 2 of TOM1-like protein 2 OS=Homo sapiens GN=TOM1L2;>sp|Q6ZVM7-3|TM1L2_HUMAN Isoform 3 of TOM1-like protein 2 OS=Homo sapiens GN=TOM1L2	55.556	20000	19069000	42000	953	0.0116531	4.37e-06	2670	28	2665	Q6ZVM7;Q6ZVM7-2;Q6ZVM7-3;Q6ZVM7-4
FBLI1_HUMAN	Filamin-binding LIM protein 1 (FBLP-1) (Migfilin) (Mitogen-inducible 2-interacting protein) (MIG2-interacting protein)	900	2500	0.011	110	0.0437	Cargo A	Cytoplasm		40.669		A1	3171	40.669	reviewed	FBLIM1 FBLP1	8.75	Alternative sequence (2); Beta strand (2); Chain (1); Compositional bias (1); Domain (3); Mutagenesis (1); Natural variant (2); Region (3)	Serves as an anchoring site for cell-ECM adhesion proteins and filamin-containing actin filaments. Is implicated in cell shape modulation (spreading) and motility. May participate in the regulation of filamin-mediated cross-linking and stabilization of actin filaments. May also regulate the assembly of filamin-containing signaling complexes that control actin assembly. Promotes dissociation of FL…		ENSGT00760000119039;	Serves as an anchoring site for cell-ECM adhesion proteins and filamin-containing actin filaments. Is implicated in cell shape modulation (spreading) and motility. May participate in the regulation of filamin-mediated cross-linking and stabilization of actin filaments. May also regulate the assembly of filamin-containing signaling complexes that control actin assembly. Promotes dissociation of FL…	Cytoplasm, cell cortex. Cell junction, focal adhesion. Cytoplasm, cytoskeleton. Note=Associated with actin stress fiber at cell-ECM focal adhesion sites. Isoform 1 and isoform 3 are recruited and localized at actin stress fibers and clustered at cell-EMC adhesion sites through interaction with FERMT2. Isoform 2 is localized at actin stress fibers.	Q8WUP2			>sp|Q8WUP2|FBLI1_HUMAN Filamin-binding LIM protein 1 OS=Homo sapiens GN=FBLIM1 PE=1 SV=2;>sp|Q8WUP2-3|FBLI1_HUMAN Isoform 3 of Filamin-binding LIM protein 1 OS=Homo sapiens GN=FBLIM1;>sp|Q8WUP2-2|FBLI1_HUMAN Isoform 2 of Filamin-binding LIM protein 1 OS=Ho	40.669	20000	18086000	42000	904	0.0110524	4.37e-06	2530	17	3171	Q8WUP2;Q8WUP2-3;Q8WUP2-2
CE030_HUMAN	UNC119-binding protein C5orf30	870	2400	0.011	110	0.0437	Cargo A	Cytoplasm		23.083		A1	3452	23.083	reviewed	C5orf30	97.32	Chain (1); Compositional bias (1); Modified residue (3)	Probably plays a role in trafficking of proteins via its interaction with UNC119 and UNC119B cargo adapters: may help the release of UNC119 and UNC119B cargo or the recycling of UNC119 and UNC119B. May play a role in ciliary membrane localization via its interaction with UNC119B and protein transport into photoreceptor cells. {ECO:0000269|PubMed:22085962}.		ENSGT00390000005782;	Probably plays a role in trafficking of proteins via its interaction with UNC119 and UNC119B cargo adapters: may help the release of UNC119 and UNC119B cargo or the recycling of UNC119 and UNC119B. May play a role in ciliary membrane localization via its interaction with UNC119B and protein transport into photoreceptor cells. {ECO:0000269|PubMed:22085962}.	Cytoplasm {ECO:0000269|PubMed:22085962}. Cell projection, cilium {ECO:0000269|PubMed:22085962}. Note=Localizes to the transition zone and proximal cilium in addition to being found throughout the cytoplasm.	Q96GV9			>sp|Q96GV9|CE030_HUMAN UNC119-binding protein C5orf30 OS=Homo sapiens GN=C5orf30 PE=1 SV=1	23.083	20000	17479000	42000	874	0.0106815	4.37e-06	2440	16	3452	Q96GV9
LTV1_HUMAN	Protein LTV1 homolog	870	2400	0.011	110	0.0437	Cargo A		Thakar&Karaca	54.854		A1	3444	54.854	reviewed	LTV1 C6orf93	31.7	Chain (1); Coiled coil (1); Compositional bias (2); Erroneous initiation (1); Modified residue (3)		K14798;	ENSGT00390000002789;			Q96GA3		406_C_406;	>sp|Q96GA3|LTV1_HUMAN Protein LTV1 homolog OS=Homo sapiens GN=LTV1 PE=1 SV=1	54.854	20000	17464000	42000	873	0.0106723	4.37e-06	2440	28	3444	Q96GA3
REN3B_HUMAN	Regulator of nonsense transcripts 3B (Nonsense mRNA reducing factor 3B) (Up-frameshift suppressor 3 homolog B) (hUpf3B) (Up-frameshift suppressor 3 homolog on chromosome X) (hUpf3p-X)	790	2200	0.0097	97	0.0437	Cargo A	Both		56.213		A1	3813	56.213	reviewed	UPF3B RENT3B UPF3X	8.55	Alternative sequence (1); Beta strand (6); Chain (1); Helix (2); Modified residue (3); Mutagenesis (16); Natural variant (1); Region (4); Sequence conflict (1); Turn (1)	Involved in nonsense-mediated decay (NMD) of mRNAs containing premature stop codons by associating with the nuclear exon junction complex (EJC) and serving as link between the EJC core and NMD machinery. Recruits UPF2 at the cytoplasmic side of the nuclear envelope and the subsequent formation of an UPF1-UPF2-UPF3 surveillance complex (including UPF1 bound to release factors at the stalled riboso…	K14328;	ENSGT00390000017146;	Involved in nonsense-mediated decay (NMD) of mRNAs containing premature stop codons by associating with the nuclear exon junction complex (EJC) and serving as link between the EJC core and NMD machinery. Recruits UPF2 at the cytoplasmic side of the nuclear envelope and the subsequent formation of an UPF1-UPF2-UPF3 surveillance complex (including UPF1 bound to release factors at the stalled riboso…	Nucleus. Cytoplasm. Note=Shuttling between the nucleus and the cytoplasm.	Q9BZI7	2_"(E.F.G)_complex::12S_U11_snRNP::6S_methyltransferase_and_RG-containing_Sm_proteins_complex::20S_methylosome-SmD_complex::20S_methylosome_and_RG-containing_Sm_protein_complex::6S_methyltransferase_complex::JBP1-pICln_complex::SMN_complex,_U7_snRNA_specific::20S_methyltransferase_complex::AR_coactivator_complex::17S_U2_snRNP::SF3A1-SF3A2-SF3A3_complex::SF3b_complex::Exon_junction_complex::SRm160…	244_C_244;	>sp|Q9BZI7-2|REN3B_HUMAN Isoform 2 of Regulator of nonsense transcripts 3B OS=Homo sapiens GN=UPF3B;>sp|Q9BZI7|REN3B_HUMAN Regulator of nonsense transcripts 3B OS=Homo sapiens GN=UPF3B PE=1 SV=1	56.213	20000	15821000	42000	791	0.00966825	4.37e-06	2210	25	3813	Q9BZI7-2;Q9BZI7
SIN1_HUMAN	Target of rapamycin complex 2 subunit MAPKAP1 (TORC2 subunit MAPKAP1) (Mitogen-activated protein kinase 2-associated protein 1) (Stress-activated map kinase-interacting protein 1) (SAPK-interacting protein 1) (mSIN1)	790	2200	0.0097	97	0.0437	Cargo A	Both		53.743		A1	3642	53.743	reviewed	MAPKAP1 MIP1 SIN1	18.42	Alternative sequence (7); Beta strand (8); Chain (1); Helix (3); Initiator methionine (1); Modified residue (2); Region (3); Sequence conflict (9); Turn (2)	Subunit of mTORC2, which regulates cell growth and survival in response to hormonal signals. mTORC2 is activated by growth factors, but, in contrast to mTORC1, seems to be nutrient-insensitive. mTORC2 seems to function upstream of Rho GTPases to regulate the actin cytoskeleton, probably by activating one or more Rho-type guanine nucleotide exchange factors. mTORC2 promotes the serum-induced forma…		ENSGT00390000000642;	Subunit of mTORC2, which regulates cell growth and survival in response to hormonal signals. mTORC2 is activated by growth factors, but, in contrast to mTORC1, seems to be nutrient-insensitive. mTORC2 seems to function upstream of Rho GTPases to regulate the actin cytoskeleton, probably by activating one or more Rho-type guanine nucleotide exchange factors. mTORC2 promotes the serum-induced forma…	Cell membrane; Peripheral membrane protein. Cytoplasmic vesicle. Nucleus.	Q9BPZ7	251_"RAPTOR-mTOR_complex::mTOR-RAPTOR_complex::mTOR-signaling_complex_(FRAP1/mTOR,_GBL,_RAPTOR)::mTORC1_complex_(mTOR/FRAP1,_LST8,_RAPTOR)::RICTOR-mTOR_complex::mTOR-RICTOR_complex::mTORC2_complex_(mTOR/FRAP1,_LST8,_mAVO3/RICTOR)::mTORC2_complex_(mTOR/FRAP1,_LST8,_mAVO3/RICTOR,_SIN1)";		>sp|Q9BPZ7-3|SIN1_HUMAN Isoform 3 of Target of rapamycin complex 2 subunit MAPKAP1 OS=Homo sapiens GN=MAPKAP1;>sp|Q9BPZ7-2|SIN1_HUMAN Isoform 2 of Target of rapamycin complex 2 subunit MAPKAP1 OS=Homo sapiens GN=MAPKAP1;>sp|Q9BPZ7|SIN1_HUMAN Target of rapa	53.743	20000	15821000	42000	791	0.00966825	4.37e-06	2210	25	3642	Q9BPZ7-3;Q9BPZ7-2;Q9BPZ7;Q9BPZ7-5;Q9BPZ7-6;Q9BPZ7-4
DVL3_HUMAN	Segment polarity protein dishevelled homolog DVL-3 (Dishevelled-3) (DSH homolog 3)	780	2200	0.0096	96	0.0437	Cargo A	Cytoplasm		76.255		A1	3287	76.255	reviewed	DVL3 KIAA0208	128.3	Alternative sequence (1); Chain (1); Domain (3); Erroneous initiation (1); Modified residue (13); Mutagenesis (3); Natural variant (2); Sequence conflict (22)	May play a role in the signal transduction pathway mediated by multiple Wnt genes.	K02353;	ENSGT00390000013552;	May play a role in the signal transduction pathway mediated by multiple Wnt genes.	Cytoplasm {ECO:0000250}.	Q92997			>sp|Q92997-2|DVL3_HUMAN Isoform 2 of Segment polarity protein dishevelled homolog DVL-3 OS=Homo sapiens GN=DVL3;>sp|Q92997|DVL3_HUMAN Segment polarity protein dishevelled homolog DVL-3 OS=Homo sapiens GN=DVL3 PE=1 SV=2	76.255	20000	15633000	42000	782	0.00955336	4.37e-06	2190	21	3287	Q92997-2;Q92997
MPLKI_HUMAN	M-phase-specific PLK1-interacting protein (TTD non-photosensitive 1 protein)	770	2100	0.0094	94	0.0437	Cargo A	Both		19.147		A1	3093	19.147	reviewed	MPLKIP C7orf11 TTDN1	68.12	Chain (1); Modified residue (10); Mutagenesis (3); Natural variant (2)	May play a role in maintenance of cell cycle integrity by regulating mitosis or cytokinesis. {ECO:0000269|PubMed:17310276}.		ENSGT00390000002582;	May play a role in maintenance of cell cycle integrity by regulating mitosis or cytokinesis. {ECO:0000269|PubMed:17310276}.	Nucleus. Cytoplasm. Cytoplasm, cytoskeleton, microtubule organizing center, centrosome. Note=The subcellular location is regulated during cell cycle. During interphase located in the nucleus. During mitosis located at the centrosome and dispersed in the cytoplasm. During telophase located in the midbody. Colocalizes with PLK1 at the centrosome in M phase.	Q8TAP9		616_C_616;	>sp|Q8TAP9|MPLKI_HUMAN M-phase-specific PLK1-interacting protein OS=Homo sapiens GN=MPLKIP PE=1 SV=1	19.147	20000	15321000	42000	766	0.0093627	4.37e-06	2140	7	3093	Q8TAP9
OSER1_HUMAN	Oxidative stress-responsive serine-rich protein 1 (Oxidative stress-responsive protein 1) (Peroxide-inducible transcript 1 protein)	730	2000	0.0089	89	0.0437	Cargo A			31.779		A1	4242	31.779	reviewed	OSER1 C20orf111 BM-038 HSPC168 HSPC207	27.63	Chain (1); Compositional bias (2); Frameshift (3); Modified residue (1); Natural variant (1)			ENSGT00390000018547;			Q9NX31			>sp|Q9NX31|OSER1_HUMAN Oxidative stress-responsive serine-rich protein 1 OS=Homo sapiens GN=OSER1 PE=2 SV=2	31.779	20000	14623000	42000	731	0.00893615	4.37e-06	2050	33	4242	Q9NX31
HAUS1_HUMAN	HAUS augmin-like complex subunit 1 (Coiled-coil domain-containing protein 5) (Enhancer of invasion-cluster) (HEI-C)	720	2000	0.0088	88	0.0437	Cargo A	Cytoplasm		31.863		A1	3374	31.863	reviewed	HAUS1 CCDC5 HEIC	65.92	Alternative sequence (1); Chain (1); Coiled coil (3); Frameshift (1)	Contributes to mitotic spindle assembly, maintenance of centrosome integrity and completion of cytokinesis as part of the HAUS augmin-like complex. {ECO:0000269|PubMed:15082789, ECO:0000269|PubMed:19369198, ECO:0000269|PubMed:19427217}.	K16584;	ENSGT00390000006029;	Contributes to mitotic spindle assembly, maintenance of centrosome integrity and completion of cytokinesis as part of the HAUS augmin-like complex. {ECO:0000269|PubMed:15082789, ECO:0000269|PubMed:19369198, ECO:0000269|PubMed:19427217}.	Cytoplasm. Cytoplasm, cytoskeleton, microtubule organizing center, centrosome. Cytoplasm, cytoskeleton, spindle. Cytoplasm, cytoskeleton, spindle pole. Note=Localizes with the spindle poles in mitotic cells. In metaphase, localizes to the mitotic asters and is highly punctate on the microtubule array. During later stages of mitosis, remains on the spindle but is not present at the interzone, and …	Q96CS2			>sp|Q96CS2|HAUS1_HUMAN HAUS augmin-like complex subunit 1 OS=Homo sapiens GN=HAUS1 PE=1 SV=1;>sp|Q96CS2-2|HAUS1_HUMAN Isoform 2 of HAUS augmin-like complex subunit 1 OS=Homo sapiens GN=HAUS1	31.863	20000	14332000	42000	717	0.00875832	4.37e-06	2000	22	3374	Q96CS2;Q96CS2-2
GORS1_HUMAN	Golgi reassembly-stacking protein 1 (Golgi peripheral membrane protein p65) (Golgi phosphoprotein 5) (GOLPH5) (Golgi reassembly-stacking protein of 65 kDa) (GRASP65)	710	2000	0.0087	87	0.0437	Cargo A	Cytoplasm		46.482		A1	3662	46.482	reviewed	GORASP1 GOLPH5 GRASP65	33.3	Alternative sequence (4); Chain (1); Compositional bias (3); Domain (1); Initiator methionine (1); Lipidation (1); Modified residue (2); Natural variant (1); Region (1); Sequence conflict (1)	Stacking factor involved in the postmitotic assembly of Golgi stacks from mitotic Golgi fragments. Key structural protein required for the maintenance of the Golgi apparatus integrity: its caspase-mediated cleavage is required for fragmentation of the Golgi during apoptosis. Also mediates, via its interaction with GM130, the docking of transport vesicles with the Golgi membranes.		ENSGT00390000008686;	Stacking factor involved in the postmitotic assembly of Golgi stacks from mitotic Golgi fragments. Key structural protein required for the maintenance of the Golgi apparatus integrity: its caspase-mediated cleavage is required for fragmentation of the Golgi during apoptosis. Also mediates, via its interaction with GM130, the docking of transport vesicles with the Golgi membranes.	Golgi apparatus, cis-Golgi network membrane {ECO:0000269|PubMed:11706049}; Peripheral membrane protein {ECO:0000269|PubMed:11706049}; Cytoplasmic side {ECO:0000269|PubMed:11706049}. Note=Undergoes rapid exchange with the cytosol.	Q9BQQ3			>sp|Q9BQQ3|GORS1_HUMAN Golgi reassembly-stacking protein 1 OS=Homo sapiens GN=GORASP1 PE=1 SV=3;>sp|Q9BQQ3-3|GORS1_HUMAN Isoform 3 of Golgi reassembly-stacking protein 1 OS=Homo sapiens GN=GORASP1;>sp|Q9BQQ3-2|GORS1_HUMAN Isoform 2 of Golgi reassembly-stac	46.482	20000	14221000	42000	711	0.00869048	4.37e-06	1990	8	3662	Q9BQQ3;Q9BQQ3-3;Q9BQQ3-2
MEX3D_HUMAN	RNA-binding protein MEX3D (RING finger and KH domain-containing protein 1) (RING finger protein 193) (TINO)	710	2000	0.0086	86	0.0437	Cargo A	Both		64.882		A1	2842	64.882	reviewed	MEX3D KIAA2031 RKHD1 RNF193	102.98	Alternative sequence (2); Beta strand (4); Chain (1); Domain (2); Erroneous initiation (1); Helix (3); Turn (2); Zinc finger (1)	RNA binding protein, may be involved in post-transcriptional regulatory mechanisms. {ECO:0000250}.	K15686;	ENSGT00390000018714;	RNA binding protein, may be involved in post-transcriptional regulatory mechanisms. {ECO:0000250}.	Cytoplasm {ECO:0000250}. Nucleus {ECO:0000250}. Note=Predominantly expressed in the cytoplasm and shuttles between the cytoplasm and the nucleus through the CRM1 export pathway. {ECO:0000250}.	Q86XN8			>sp|Q86XN8|MEX3D_HUMAN RNA-binding protein MEX3D OS=Homo sapiens GN=MEX3D PE=1 SV=3;>sp|Q86XN8-2|MEX3D_HUMAN Isoform 2 of RNA-binding protein MEX3D OS=Homo sapiens GN=MEX3D;>sp|Q86XN8-3|MEX3D_HUMAN Isoform 3 of RNA-binding protein MEX3D OS=Homo sapiens GN=	64.882	20000	14110000	42000	706	0.00862265	4.37e-06	1970	21	2842	Q86XN8;Q86XN8-2;Q86XN8-3
FARP2_HUMAN	FERM, RhoGEF and pleckstrin domain-containing protein 2 (FERM domain including RhoGEF) (FIR) (Pleckstrin homology domain-containing family C member 3) (PH domain-containing family C member 3)	680	1900	0.0084	84	0.0437	Cargo A			72.262		A1	549	72.262	reviewed	FARP2 KIAA0793 PLEKHC3	54.86	Alternative sequence (4); Chain (1); Compositional bias (2); Domain (4); Erroneous initiation (1); Modified residue (1); Natural variant (3); Sequence conflict (1)	Functions as guanine nucleotide exchange factor that activates RAC1. May have relatively low activity. Plays a role in the response to class 3 semaphorins and remodeling of the actin cytoskeleton. Plays a role in TNFSF11-mediated osteoclast differentiation, especially in podosome rearrangement and reorganization of the actin cytoskeleton. Regulates the activation of ITGB3, integrin signaling and …	K06082;	ENSGT00760000118823;	Functions as guanine nucleotide exchange factor that activates RAC1. May have relatively low activity. Plays a role in the response to class 3 semaphorins and remodeling of the actin cytoskeleton. Plays a role in TNFSF11-mediated osteoclast differentiation, especially in podosome rearrangement and reorganization of the actin cytoskeleton. Regulates the activation of ITGB3, integrin signaling and …		O94887	133_FARP2-NRP1-PlexinA1_complex::FARP2-NRP1-PlexinA2_complex::FARP2-NRP1-PlexinA3_complex::FARP2-NRP1-PlexinA4_complex::PlexinA1-NRP1-SEMA3A_complex;		>sp|O94887-3|FARP2_HUMAN Isoform 3 of FERM, RhoGEF and pleckstrin domain-containing protein 2 OS=Homo sapiens GN=FARP2;>sp|O94887-2|FARP2_HUMAN Isoform 2 of FERM, RhoGEF and pleckstrin domain-containing protein 2 OS=Homo sapiens GN=FARP2;>sp|O94887|FARP2_H	72.262	20000	13693000	42000	685	0.00836782	4.37e-06	1920	31	549	O94887-3;O94887-2;O94887
DEN1B_HUMAN	DENN domain-containing protein 1B (Connecdenn 2) (Protein FAM31B)	670	1900	0.0082	82	0.0437	Cargo A	Cytoplasm		86.551		A1	2583	86.551	reviewed	DENND1B C1orf218 FAM31B	103.71	Alternative sequence (5); Beta strand (11); Chain (1); Domain (3); Erroneous gene model prediction (1); Erroneous initiation (3); Helix (18); Natural variant (1); Sequence conflict (2); Turn (4)	Guanine nucleotide exchange factor (GEF) for RAB35. Promotes the exchange of GDP to GTP, converting inactive GDP-bound RAB35 into its active GTP-bound form. May play a role in clathrin-mediated endocytosis. {ECO:0000269|PubMed:20154091, ECO:0000269|PubMed:20937701}.		ENSGT00760000118819;	Guanine nucleotide exchange factor (GEF) for RAB35. Promotes the exchange of GDP to GTP, converting inactive GDP-bound RAB35 into its active GTP-bound form. May play a role in clathrin-mediated endocytosis. {ECO:0000269|PubMed:20154091, ECO:0000269|PubMed:20937701}.	Cytoplasm, cytosol {ECO:0000250}. Cytoplasmic vesicle, clathrin-coated vesicle {ECO:0000250}.	Q6P3S1			>sp|Q6P3S1-5|DEN1B_HUMAN Isoform 5 of DENN domain-containing protein 1B OS=Homo sapiens GN=DENND1B;>sp|Q6P3S1|DEN1B_HUMAN DENN domain-containing protein 1B OS=Homo sapiens GN=DENND1B PE=1 SV=1	86.551	20000	13437000	42000	672	0.00821138	4.37e-06	1880	40	2583	Q6P3S1-5;Q6P3S1;Q8IV53-2;Q8IV53
UBIP1_HUMAN	Upstream-binding protein 1 (Transcription factor LBP-1)	670	1900	0.0082	82	0.0437	Cargo A	Nucleus		56.452		A1	4296	56.452	reviewed	UBP1 LBP1	79.47	Alternative sequence (1); Chain (1); Natural variant (2); Sequence conflict (6)	Functions as a transcriptional activator in a promoter context-dependent manner. Modulates the placental expression of CYP11A1. Involved in regulation of the alpha-globin gene in erythroid cells. Activation of the alpha-globin promoter in erythroid cells is via synergistic interaction with TFCP2 (By similarity). Involved in regulation of the alpha-globin gene in erythroid cells. Binds strongly to…	K09275;	ENSGT00760000119235;	Functions as a transcriptional activator in a promoter context-dependent manner. Modulates the placental expression of CYP11A1. Involved in regulation of the alpha-globin gene in erythroid cells. Activation of the alpha-globin promoter in erythroid cells is via synergistic interaction with TFCP2 (By similarity). Involved in regulation of the alpha-globin gene in erythroid cells. Binds strongly to…	Nucleus {ECO:0000269|PubMed:8114710}.	Q9NZI7		171_C_171;	>sp|Q9NZI7-4|UBIP1_HUMAN Isoform 2 of Upstream-binding protein 1 OS=Homo sapiens GN=UBP1;>sp|Q9NZI7|UBIP1_HUMAN Upstream-binding protein 1 OS=Homo sapiens GN=UBP1 PE=2 SV=1	56.452	20000	13362000	42000	668	0.00816555	4.37e-06	1870	17	4296	Q9NZI7-4;Q9NZI7
TNIP2_HUMAN	TNFAIP3-interacting protein 2 (A20-binding inhibitor of NF-kappa-B activation 2) (ABIN-2) (Fetal liver LKB1-interacting protein)	670	1900	0.0081	81	0.0437	Cargo A	Both		48.699		A1	3073	48.699	reviewed	TNIP2 ABIN2 FLIP1	71	Alternative sequence (1); Chain (1); Coiled coil (3); Mutagenesis (4); Natural variant (3); Region (1); Sequence conflict (1)	Inhibits NF-kappa-B activation by blocking the interaction of RIPK1 with its downstream effector NEMO/IKBKG. Forms a ternary complex with NFKB1 and MAP3K8 but appears to function upstream of MAP3K8 in the TLR4 signaling pathway that regulates MAP3K8 activation. Involved in activation of the MEK/ERK signaling pathway during innate immune response; this function seems to be stimulus- and cell type …		ENSGT00390000009019;	Inhibits NF-kappa-B activation by blocking the interaction of RIPK1 with its downstream effector NEMO/IKBKG. Forms a ternary complex with NFKB1 and MAP3K8 but appears to function upstream of MAP3K8 in the TLR4 signaling pathway that regulates MAP3K8 activation. Involved in activation of the MEK/ERK signaling pathway during innate immune response; this function seems to be stimulus- and cell type …	Cytoplasm {ECO:0000269|PubMed:12595760}. Nucleus {ECO:0000305}.	Q8NFZ5	10_"ABIN2-NFKB1-MAP3K8_complex::TNF-alpha/Nf-kappa_B_signaling_complex_(RPL6,_RPL30,_RPS13,_CHUK,_DDX3X,_NFKB2,_NFKBIB,_REL,_IKBKG,_NFKB1,_MAP3K8,_RELB,_GLG1,_NFKBIA,_RELA,_TNIP2,__GTF2I)::I(kappa)B(alpha)-NF(kappa)Bp50-NF(kappa)Bp65_complex::IKB(alpha)-RELA-cREL_complex::IKB(beta)-RELA-cREL_complex::IKBA-NF(kappa)Bp65-NF(kappa)Bp50_complex::TNF-alpha/NF-kappa_B_signaling_complex_(CHUK,_KPNA3,_NF…		>sp|Q8NFZ5|TNIP2_HUMAN TNFAIP3-interacting protein 2 OS=Homo sapiens GN=TNIP2 PE=1 SV=1;>sp|Q8NFZ5-2|TNIP2_HUMAN Isoform 2 of TNFAIP3-interacting protein 2 OS=Homo sapiens GN=TNIP2	48.699	20000	13321000	42000	666	0.00814049	4.37e-06	1860	26	3073	Q8NFZ5;Q8NFZ5-2
[truncated: 4,366 more rows]

## Sheet: Translation factors
INDEX		HeLa
KEGG	Name	UniProtLink	Mass (Isoform)	Protein description	Ran Enrichment	Enrichment from input	Molar Fraction in CRM1+RanGTP (×10^6)	Category	Reported CRM1 interactions	Localization	id	Sorting
B Initiation factors												1
C eIF-1A												2
K03236	EIF1A; translation initiation factor 1A	IF1AX_HUMAN	16.5	Eukaryotic translation initiation factor 1A, X-chromosomal (eIF-1A X isoform) (Eukaryotic translation initiation factor 4C) (eIF-4C)	250	0.2	30	Ambiguous			1343	3
C eIF-1												4
[truncated: 78 more rows]

## Sheet: Vesicle coat proteins
INDEX	HeLa
[truncated: 46 more rows]

[truncated: 8 more sheets: Cytoskeleton, Centrosomal proteins, Autophagy, Aminoacyl tRNA ligases, Cytoplasmic mRNA metabolism, Protein kinases, Protein phosphatases, Ubiquitin pathway]
