# Supplementary material for: A deep proteomics perspective on CRM1-mediated nuclear export and nucleocytoplasmic partitioning
Source: eLife. 2015 Dec 17;4:e11466. doi: 10.7554/eLife.11466 (PMC4764573; doi:10.7554/eLife.11466)
Supplement: Supplementary file 4. — DOI: http://dx.doi.org/10.7554/eLife.11466.017 [file elife-11466-supp4.xlsx]

## Sheet: Index
								Category threshold for Yeast CRM1 cargo analysis
								# of proteins in each category
	Index for Yeast CRM1 affinity chromatography MS Data											RanGTP stimulation	Enrichment from input	Molar fraction in "CRM1+RanGTP" (×10ˆ6)	Molar fraction in starting extract (x10ˆ6)	No of proteins	No of flagged proteins	CRM1 Exportome
								Categories of
	Main Table			MS data sheet with simplified columns				CRM1-binders
								A	A1			≥100	≥4	≥50	---	332	8	707 (Note that flagged proteins are excluded)
	Extended Table			MS data sheet with full columns					A2			2-99	≥100	≥50	---	19	1
								B (not part of A)	B1		B1a	10-100	≥4	≥50	---	54	---
											B1b	≥100	2-4	≥50	---	34	1
	Translation Factors			Cytoplasmic mRNA Biogenesis							B1c	≥100	≥3	10-50	---	169	6
									B2		B2a	10-99	20-50	≥50	---	---	---
											B2b	2-99	≥50	10-50	---	29	3
	Ribosome Biogenesis			Protein Kinases				C/Low abundant				---	---	≥1	---	102	13
								detected only in “CRM1+RanGTP”-fraction, but not part of A or B
								Ambiguous		Ambiguous Cargoes (not part of A,B or C)		≥ 50	≥ 3	---	---	180	11
	Autophagy Proteins			Protein Phosphatases						Ambiguous		Proteins that do not satisfy any of the criteria above			---	956	102
										Ambiguous Non-binder		---	< 0.01 & 0	---	<10	372	58
	Aminoacyl tRNA ligases			Ubiquitin System				Non-binder (NB)				---	< 0.01 & 0	---	≥10	568	66
								NPC and transport-related				Manually assigned			---	29	---
	Table S4. Identification of CRM1 cargoes from the yeast Saccharomyces cerevisiae This Excel file is based on mass spectrometric protein quantifications from three samples, namely: (i) input extract used for affinity chromatography, (ii) sample "bound to CRM1 w/o Ran", and (iii) sample "bound to CRM1+RanGTP". For each identified unique protein, three parameters were then derived: RanGTP stimulatio…

## Sheet: Main table
		Binding to CRM1
UniProt Link	Protein name	RanGTP Stimulation	Enrichment from input	Molar Fraction in CRM1+RanGTP (×10^6)	Molar Fraction in Input (×10^6)	Category	Simplified Localization	Reported CRM1 interactions	Mw (KDa)	FLAGS	Sorting	id
RNA1_YEAST	Ran GTPase-activating protein 1 (Protein involved in RNA production/processing)	250	140	58000	418.915	Cargo A	Cytoplasm	BioGrid	45.816		A1	333
IF2G_YEAST	Eukaryotic translation initiation factor 2 subunit gamma (eIF-2-gamma)	550	48	31000	642.991	Cargo A			57.866		A1	833
IF2B_YEAST	Eukaryotic translation initiation factor 2 subunit beta (eIF-2-beta)	640	120	27000	228.515	Cargo A			31.574		A1	253
IF2A_YEAST	Eukaryotic translation initiation factor 2 subunit alpha (eIF-2-alpha)	580	130	26000	197.617	Cargo A			34.718		A1	503
PABP_YEAST	Polyadenylate-binding protein, cytoplasmic and nuclear (PABP) (Poly(A)-binding protein) (ARS consensus-binding protein ACBP-67) (Polyadenylate tail-binding protein)	120	23	22000	955.119	Cargo A	Both	BioGrid	64.344		A1	123
GPD2_YEAST	Glycerol-3-phosphate dehydrogenase [NAD(+)] 2, mitochondrial (EC 1.1.1.8)	27000	150	17000	117.515	Cargo A	Cytoplasm		49.422	MT	A1	1685
SSBP1_YEAST	Single-stranded nucleic acid-binding protein	170	39	11000	287.488	Cargo A	Both	BioGrid	32.99		A1	305
RS3_YEAST	40S ribosomal protein S3 (RP13) (YS3)	200	7	10000	1471.03	Cargo A	Cytoplasm		26.503		A1	154
EIF3J_YEAST	Eukaryotic translation initiation factor 3 subunit J (eIF3j) (Eukaryotic translation initiation factor 3 30 kDa subunit) (eIF-3 30 kDa)	450	50	6100	121.253	Cargo A	Cytoplasm		29.564		A1	2499
RS7A_YEAST	40S ribosomal protein S7-A (RP30) (RP40)	300	5.5	5900	1060.84	Cargo A	Both		21.622		A1	700
RTG2_YEAST	Retrograde regulation protein 2	8300	71	5800	81.9743	Cargo A			65.572		A1	879
RS5_YEAST	40S ribosomal protein S5 (RP14) (S2) (YS8)	150	3.7	5600	1505.13	Cargo A	Cytoplasm		25.039		A1	697
EI2BA_YEAST	Translation initiation factor eIF-2B subunit alpha (GCD complex subunit GCN3) (Guanine nucleotide exchange factor subunit GCN3) (Transcriptional activator GCN3) (eIF-2B GDP-GTP exchange factor subunit alpha)	2000	58	5200	90.1593	Cargo A			34.025		A1	379
GGA2_YEAST	ADP-ribosylation factor-binding protein GGA2 (Golgi-localized, gamma ear-containing, ARF-binding protein 2)	160	12	5000	406.056	Cargo A	Cytoplasm	BioGrid	64.347		A1	1352
DCP1_YEAST	mRNA-decapping enzyme subunit 1	35000	130	4800	36.3813	Cargo A	Cytoplasm	BioGrid	26.266		A1	2942
TPM1_YEAST	Tropomyosin-1	830	20	4800	245.603	Cargo A	Cytoplasm		23.541		A1	442
RS11B_YEAST	40S ribosomal protein S11-B (RP41) (S18) (YS12)	310	7.5	4800	645.503	Cargo A	Cytoplasm		17.749		A1	296
EIF3I_YEAST	Eukaryotic translation initiation factor 3 subunit I (eIF3i) (Eukaryotic translation initiation factor 3 39 kDa subunit) (eIF-3 39 kDa subunit) (eIF3 p39)	170	16	4600	296.344	Cargo A	Cytoplasm		38.755		A1	1558
EI2BB_YEAST	Translation initiation factor eIF-2B subunit beta (GCD complex subunit GCD7) (Guanine nucleotide exchange factor subunit GCD7) (eIF-2B GDP-GTP exchange factor subunit beta)	980	100	4500	43.264	Cargo A			42.57		A1	845
PP12_YEAST	Serine/threonine-protein phosphatase PP1-2 (EC 3.1.3.16)	220	12	4100	344.338	Cargo A	Both		35.907		A1	872
EI2BD_YEAST	Translation initiation factor eIF-2B subunit delta (GCD complex subunit GCD2) (Guanine nucleotide exchange factor subunit GCD2) (eIF-2B GDP-GTP exchange factor subunit delta)	1600	38	4000	105.757	Cargo A			70.852		A1	349
RS9B_YEAST	40S ribosomal protein S9-B (RP21) (S13) (YP28) (YS11)	390	8.7	4000	464.716	Cargo A	Both		22.299		A1	155
ENP1_YEAST	Essential nuclear protein 1	3400	79	3800	47.7926	Cargo A	Both		55.137		A1	1244
FSH3_YEAST	Family of serine hydrolases 3 (EC 3.1.-.-)	440	27	3700	134.4	Cargo A			30.418		A1	2992
EDC3_YEAST	Enhancer of mRNA-decapping protein 3	25000	97	3500	35.8133	Cargo A	Cytoplasm		61.34		A1	1495
EIF3G_YEAST	Eukaryotic translation initiation factor 3 subunit G (eIF3g) (Eukaryotic translation initiation factor 3 RNA-binding subunit) (eIF-3 RNA-binding subunit) (Translation initiation factor eIF3 p33 subunit) (eIF3 p33)	230	9	3400	380.745	Cargo A	Cytoplasm		30.501		A1	2389
SMI1_YEAST	Cell wall assembly regulator SMI1 (Killer toxin-resistance protein 4)	2500	130	3300	25.1603	Cargo A	Nucleus		57.079		A1	858
LTV1_YEAST	Protein LTV1 (Low-temperature viability protein 1)	880	160	3200	20.3937	Cargo A	Both	NESdb, BioGrid	53.39		A1	981
YSC84_YEAST	Protein YSC84 (LAS seventeen-binding protein 4) (LAS17-binding protein 4)	290	380	3100	8.37533	Cargo A	Cytoplasm	BioGrid	50.902		A1	904
DCP2_YEAST	mRNA-decapping enzyme subunit 2 (EC 3.-.-.-) (Protein PSU1)	7900	69	3000	44.2151	Cargo A	Cytoplasm	BioGrid	108.667		A1	2060
EI2BE_YEAST	Translation initiation factor eIF-2B subunit epsilon (GCD complex subunit GCD6) (Guanine nucleotide exchange factor subunit GCD6) (eIF-2B GDP-GTP exchange factor subunit epsilon)	490	33	3000	91.7198	Cargo A			81.161		A1	844
OCA1_YEAST	Putative tyrosine-protein phosphatase OCA1 (EC 3.1.3.48) (Oxidant-induced cell-cycle arrest protein 1)	1100	26	3000	113.606	Cargo A	Cytoplasm		27.205		A1	1918
RS14B_YEAST	40S ribosomal protein S14-B (RP59B)	340	3	3000	1016.99	Cargo A	Both		14.65		A1	1435
ELP6_YEAST	Elongator complex protein 6 (Gamma-toxin target 6) (HAT-associated protein 3)	420	24	2900	123.804	Cargo A	Both		30.574		A1	2466
RS13_YEAST	40S ribosomal protein S13 (S27a) (YS15)	21000	4.9	2900	600.256	Cargo A	Cytoplasm		17.029		A1	156
EI2BG_YEAST	Translation initiation factor eIF-2B subunit gamma (GCD complex subunit GCD1) (Guanine nucleotide exchange factor subunit GCD1) (eIF-2B GDP-GTP exchange factor subunit gamma)	350	52	2600	49.0262	Cargo A			65.7		A1	252
RS6B_YEAST	40S ribosomal protein S6-B (RP9) (S10) (YS4)	610	6.2	2600	419.875	Cargo A	Both		26.996		A1	291
YPK1_YEAST	Serine/threonine-protein kinase YPK1 (EC 2.7.11.1) (Sphingosine-like immunosuppressant resistant protein 2) (Yeast protein kinase 1)	1200	25	2500	99.897	Cargo A	Cytoplasm		76.48		A1	345
EIF3B_YEAST	Eukaryotic translation initiation factor 3 subunit B (eIF3b) (Cell cycle regulation and translation initiation protein) (Eukaryotic translation initiation factor 3 90 kDa subunit) (eIF3 p90) (Translation initiation factor eIF3 p90 subunit)	240	7.2	2500	344.954	Cargo A	Cytoplasm		88.13		A1	162
SPT5_YEAST	Transcription elongation factor SPT5 (Chromatin elongation factor SPT5)	430	24	2400	100.279	Cargo A	Both		115.65		A1	712
EIF3C_YEAST	Eukaryotic translation initiation factor 3 subunit C (eIF3c) (Eukaryotic translation initiation factor 3 93 kDa subunit) (eIF3 p93) (Nuclear transport protein NIP1) (Translation initiation factor eIF3, p93 subunit)	420	5.7	2400	423.667	Cargo A	Cytoplasm		93.204		A1	842
RS4B_YEAST	40S ribosomal protein S4-B (RP5) (S7) (YS6)	240	3.4	2400	692.358	Cargo A	Cytoplasm		29.41		A1	290
PSP2_YEAST	Protein PSP2 (Mitochondrial regulator of splicing 15) (Polymerase suppressor protein 2)	350	130	2300	17.63	Cargo A	Cytoplasm		65.584		A1	1908
ENT3_YEAST	Epsin-3	250	19	2300	120.746	Cargo A	Cytoplasm		45.091		A1	1844
RS3A2_YEAST	40S ribosomal protein S1-B (RP10B)	600	3.3	2300	710.928	Cargo A	Cytoplasm		28.812		A1	573
OCA4_YEAST	Protein OCA4 (Oxidant-induced cell-cycle arrest protein 4)	1100	4900	2200	0.0585197	Cargo A			41.647		A1	639
IF5_YEAST	Eukaryotic translation initiation factor 5 (eIF-5)	290	10	2200	215.719	Cargo A			45.261		A1	1262
EIF3A_YEAST	Eukaryotic translation initiation factor 3 subunit A (eIF3a) (Eukaryotic translation initiation factor 3 110 kDa subunit homolog) (eIF3 p110) (Translation initiation factor eIF3, p110 subunit homolog)	500	5.7	2200	391.941	Cargo A	Cytoplasm		110.344		A1	1217
YC16_YEAST	UPF0743 protein YCR087C-A	320	69	2100	30.2539	Cargo A	Nucleus		17.738		A1	1129
ELP5_YEAST	Elongator complex protein 5 (Gamma-toxin target 5) (HAT-associated protein 2) (Protein IKI1)	150	48	2100	43.3607	Cargo A	Both		35.22		A1	1379
NAM7_YEAST	ATP-dependent helicase NAM7 (EC 3.6.4.-) (Nonsense-mediated mRNA decay protein 1) (Nuclear accommodation of mitochondria 7 protein) (Up-frameshift suppressor 1)	14000	61	1900	31.7247	Cargo A	Both		109.43		A1	759
ELP4_YEAST	Elongator complex protein 4 (Gamma-toxin target 7) (HAT-associated protein 1)	5200	300	1800	5.91688	Cargo A	Both		51.156		A1	2274
NBP2_YEAST	NAP1-binding protein 2	1800	93	1800	19.1913	Cargo A	Cytoplasm		26.571		A1	2814
STE20_YEAST	Serine/threonine-protein kinase STE20 (EC 2.7.11.1)	1700	12	1800	143.732	Cargo A	Both		102.362		A1	2330
YG32_YEAST	Uncharacterized protein YGR117C	950	210	1700	8.30199	Cargo A			53.438		A1	2029
PP2C1_YEAST	Protein phosphatase 2C homolog 1 (PP2C-1) (EC 3.1.3.16)	4600	57	1700	29.7912	Cargo A			31.55		A1	1016
AAKG_YEAST	5'-AMP-activated protein kinase subunit gamma (AMPK gamma) (AMPK subunit gamma) (Regulatory protein CAT3) (Sucrose non-fermenting protein 4)	650	15	1700	119.794	Cargo A	Both		36.401		A1	352
IF6_YEAST	Eukaryotic translation initiation factor 6 (eIF-6)	12000	9.1	1700	182.862	Cargo A	Both		26.458		A1	2944
HCS1_YEAST	DNA polymerase alpha-associated DNA helicase A (EC 3.6.4.12)	12000	250	1600	6.4335	Cargo A	Both		78.273		A1	1001
DHH1_YEAST	ATP-dependent RNA helicase DHH1 (EC 3.6.4.13) (DExD/H-box helicase 1)	180	9.3	1600	172.586	Cargo A	Cytoplasm		57.544		A1	1436
RL9A_YEAST	60S ribosomal protein L9-A (L8) (RP24) (YL11)	180	3	1500	496.434	Cargo A	Cytoplasm		21.569		A1	147
PBS2_YEAST	MAP kinase kinase PBS2 (EC 2.7.12.2) (Polymyxin B resistance protein 2) (Suppressor of fluoride sensitivity 4)	340	53	1400	26.1544	Cargo A	Cytoplasm		72.72		A1	237
GLO3_YEAST	ADP-ribosylation factor GTPase-activating protein GLO3 (ARF GAP GLO3)	2800	25	1400	56.569	Cargo A	Cytoplasm		55.094		A1	1280
ECM25_YEAST	Protein ECM25 (Extracellular matrix protein 25)	760	150	1300	9.06431	Cargo A	Cytoplasm		68.464		A1	851
TTL_YEAST	Probable tubulin--tyrosine ligase PBY1 (EC 6.3.2.25) (P-body-associated protein 1)	9200	33	1300	38.7541	Cargo A	Cytoplasm		86.353		A1	1219
RL11B_YEAST	60S ribosomal protein L11-B (L16) (RP39) (YL22)	580	3.3	1300	404.316	Cargo A	Both		19.75		A1	271
SIW14_YEAST	Tyrosine-protein phosphatase SIW14 (EC 3.1.3.48)	8700	39	1200	30.6323	Cargo A	Cytoplasm		32.755		A1	2154
PP11_YEAST	Serine/threonine-protein phosphatase PP1-1 (EC 3.1.3.16)	1100	13	1200	90.9083	Cargo A	Cytoplasm		35.538		A1	507
MOB1_YEAST	DBF2 kinase activator protein MOB1 (MPS1 binder 1) (Maintenance of ploidy protein MOB1)	250	79	1100	13.8106	Cargo A	Both		35.882		A1	1604
AP1G1_YEAST	AP-1 complex subunit gamma-1 (Clathrin assembly protein complex 1 gamma large chain) (Clathrin assembly protein large gamma chain) (Gamma-adaptin)	7800	25	1100	44.1254	Cargo A	Cytoplasm		93.624		A1	2766
RS7B_YEAST	40S ribosomal protein S7-B	8300	4.8	1100	238.175	Cargo A	Both		21.634		A1	1859
MNP1_YEAST	54S ribosomal protein L12, mitochondrial (Mitochondrial-nucleoid protein 1)	830	66	1000	15.8627	Cargo A	Cytoplasm		20.65	MT	A1	1989
RTR1_YEAST	RNA polymerase II subunit B1 CTD phosphatase RTR1 (EC 3.1.3.16) (RNA polymerase II-associated protein 2 homolog RTR1) (Regulator of transcription 1)	390	60	1000	16.5353	Cargo A	Both		26.24		A1	1534
WHI3_YEAST	Protein WHI3	190	39	1000	26.8356	Cargo A			71.253		A1	1008
AP1S1_YEAST	AP-1 complex subunit sigma-1 (Clathrin assembly protein complex 1 sigma-1 small chain) (Clathrin coat assembly protein AP19) (Clathrin coat-associated protein AP19) (Golgi adaptor AP-1 19 kDa adaptin) (HA1 19 kDa subunit) (Sigma1-adaptin)	820	22	1000	46.5949	Cargo A	Cytoplasm		18.152		A1	1015
NSR1_YEAST	Nuclear localization sequence-binding protein (p67)	2000	8.3	1000	125.263	Cargo A	Nucleus		44.535		A1	706
RL19B_YEAST	60S ribosomal protein L19-B (L23) (RP15L) (RP33) (YL14)	7400	5	1000	204.694	Cargo A	Cytoplasm		21.704		A1	303
AP1B1_YEAST	AP-1 complex subunit beta-1 (Beta-1-adaptin) (Clathrin assembly protein complex 1 beta-1 large chain) (Clathrin assembly protein large beta-1 chain)	1800	19	970	50.1997	Cargo A	Cytoplasm		81.869		A1	1041
IF2P_YEAST	Eukaryotic translation initiation factor 5B (eIF-5B) (Translation initiation factor IF-2)	4800	4.4	960	218.481	Cargo A			112.268		A1	1463
REG1_YEAST	Resistance to glucose repression protein 1 (Protein HEX2) (Second-site suppressor of the rna1-1 mutation 1)	6600	54	910	16.9044	Cargo A	Nucleus		112.616		A1	2212
RL16B_YEAST	60S ribosomal protein L16-B (L21) (RP23) (YL15)	110	4.6	910	196.478	Cargo A	Cytoplasm		22.249		A1	699
NMD3_YEAST	60S ribosomal export protein NMD3 (Nonsense-mediated mRNA decay protein 3)	250	12	900	77.9537	Cargo A	Both	NESdb, BioGrid	59.095		A1	1374
PTK2_YEAST	Serine/threonine-protein kinase PTK2/STK2 (EC 2.7.11.1)	740	38	890	23.5936	Cargo A	Both		91.4		A1	1822
OCA6_YEAST	Putative tyrosine-protein phosphatase OCA6 (EC 3.1.3.48) (Oxidant-induced cell-cycle arrest protein 6)	6300	120	870	7.16374	Cargo A	Cytoplasm		26.024		A1	2917
YAP1_YEAST	AP-1-like transcription factor YAP1 (Phenanthroline resistance protein PAR1) (Pleiotropic drug resistance protein PDR4)	6200	150	860	5.84143	Cargo A	Both	NESdb, BioGrid	72.533		A1	481
AMPD_YEAST	AMP deaminase (EC 3.5.4.6) (Myoadenylate deaminase)	6200	9.5	860	91.5716	Cargo A			93.302		A1	392
RL24A_YEAST	60S ribosomal protein L24-A (L30) (RP29) (YL21)	6200	4.5	860	191.383	Cargo A	Cytoplasm		17.614		A1	126
YJE9_YEAST	Uncharacterized protein YJL049W	170	4900	840	0.0585197	Cargo A			52.849		A1	1795
EAP1_YEAST	Protein EAP1 (eIF4E-associated protein 1)	1400	17	820	48.5417	Cargo A	Cytoplasm		69.762		A1	1060
SMY2_YEAST	Protein SMY2 (Suppressor of MYO2-66 protein)	370	16	820	51.8375	Cargo A	Cytoplasm		81.397		A1	932
SNF1_YEAST	Carbon catabolite-derepressing protein kinase (EC 2.7.11.1)	5900	38	810	21.4549	Cargo A	Both		72.045		A1	187
RL17B_YEAST	60S ribosomal protein L17-B (L20) (YL17)	480	4.6	810	175.184	Cargo A	Cytoplasm		20.551		A1	1778
AP3S_YEAST	AP-3 complex subunit sigma (AP-3 complex sigma3A subunit) (Adaptor-related protein complex 3 subunit sigma) (Clathrin-associated/assembly/adaptor protein, small 3) (Sigma-adaptin 3A) (Sigma3-adaptin)	5800	13	800	63.7981	Cargo A	Cytoplasm		21.938		A1	1802
YD333_YEAST	Uncharacterized protein YDR333C	5700	200	790	4.04738	Cargo A	Cytoplasm		83.426		A1	2482
GAL83_YEAST	SNF1 protein kinase subunit beta-3 (Glucose repression protein GAL83) (Protein SPM1)	5700	160	790	4.83638	Cargo A	Both		46.648		A1	2457
RL8B_YEAST	60S ribosomal protein L8-B (L4) (L4-1) (RP6) (YL5)	290	3	780	257.877	Cargo A	Cytoplasm		28.112		A1	742
STE50_YEAST	Protein STE50	5600	4900	770	0.0585197	Cargo A			38.971		A1	631
PUR91_YEAST	Bifunctional purine biosynthesis protein ADE16 [Includes: Phosphoribosylaminoimidazolecarboxamide formyltransferase (EC 2.1.2.3) (5-aminoimidazole-4-carboxamide ribonucleotide formyltransferase) (AICAR transformylase); IMP cyclohydrolase (EC 3.5.4.10) (ATIC) (IMP synthase) (Inosinicase)]	1100	3.7	760	207.284	Cargo A			65.282		A1	2164
AP3M_YEAST	AP-3 complex subunit mu (AP-3 adaptor complex mu3A subunit) (Adaptor-related protein complex 3 subunit mu) (Mu-adaptin 3A) (Mu3-adaptin)	150	89	740	8.4401	Cargo A	Cytoplasm		54.837		A1	1183
PUF3_YEAST	mRNA-binding protein PUF3 (Pumilio homology domain family member 3)	180	76	730	9.5824	Cargo A	Cytoplasm	BioGrid	98.068		A1	2655
RPAB1_YEAST	DNA-directed RNA polymerases I, II, and III subunit RPABC1 (RNA polymerases I, II, and III subunit ABC1) (ABC27) (DNA-directed RNA polymerases I, II, and III 27 kDa polypeptide)	210	6.2	720	115.775	Cargo A	Nucleus		25.079		A1	496
OCA2_YEAST	Tyrosine-protein phosphatase-like protein OCA2 (Oxidant-induced cell-cycle arrest protein 2)	5100	31	710	22.9054	Cargo A	Cytoplasm		22.472		A1	2147
RS15_YEAST	40S ribosomal protein S15 (RIG protein) (RP52) (S21) (YS21)	5100	3.6	710	198.702	Cargo A	Cytoplasm		16.002		A1	2232
RIO2_YEAST	Serine/threonine-protein kinase RIO2 (EC 2.7.11.1)	5000	86	700	8.08196	Cargo A	Both		49.125		A1	1546
OCA5_YEAST	Oxidant-induced cell-cycle arrest protein 5	4700	24	660	26.9214	Cargo A	Cytoplasm		77.756		A1	1305
NHP2_YEAST	H/ACA ribonucleoprotein complex subunit 2 (H/ACA snoRNP protein NHP2) (High mobility group-like nuclear protein 2)	4500	24	630	26.2035	Cargo A	Nucleus		17.122		A1	840
IWR1_YEAST	RNA polymerase II nuclear localization protein IWR1 (Interacting with RNA polymerase II protein 1)	4400	94	620	6.59969	Cargo A	Both		40.64		A1	2641
LSM1_YEAST	Sm-like protein LSm1 (SPB8 protein)	4500	6.6	620	95.5743	Cargo A	Both		20.307		A1	1785
MKS1_YEAST	Negative regulator of RAS-cAMP pathway	4300	290	590	2.01393	Cargo A	Nucleus		65.643		A1	979
KSP1_YEAST	Serine/threonine-protein kinase KSP1 (EC 2.7.11.1)	100	120	590	5.15909	Cargo A	Nucleus	BioGrid	117.082		A1	1284
AP3D_YEAST	AP-3 complex subunit delta (Adaptor-related protein complex 3 subunit delta) (Delta-adaptin 3) (Delta-adaptin)	1200	24	590	24.9021	Cargo A	Cytoplasm		106.924		A1	2740
CLA4_YEAST	Serine/threonine-protein kinase CLA4 (EC 2.7.11.1)	1500	160	560	3.59834	Cargo A			93.909		A1	1872
SFB2_YEAST	SED5-binding protein 2 (SEC24-related protein 2)	4000	770	550	0.717685	Cargo A	Cytoplasm		98.944		A1	2149
ATG13_YEAST	Autophagy-related protein 13	130	990	540	0.552402	Cargo A	Cytoplasm		83.281		A1	2593
AP3B_YEAST	AP-3 complex subunit beta (Adaptor-related protein complex 3 subunit beta) (Beta-3-adaptin) (Clathrin assembly protein complex 3 beta large chain) (Clathrin assembly protein large beta chain)	3900	48	540	11.3481	Cargo A	Cytoplasm		91.607		A1	1765
RPB4_YEAST	DNA-directed RNA polymerase II subunit RPB4 (RNA polymerase II subunit B4) (B32) (DNA-directed RNA polymerase II 32 kDa polypeptide)	3900	5.7	540	94.9033	Cargo A	Both		25.414		A1	495
RPB7_YEAST	DNA-directed RNA polymerase II subunit RPB7 (RNA polymerase II subunit B7) (B16)	3900	5.4	540	100.802	Cargo A	Both		19.058		A1	982
ARD1_YEAST	N-terminal acetyltransferase A complex catalytic subunit ARD1 (NatA complex subunit ARD1) (EC 2.3.1.88) (Arrest-defective protein 1)	440	3.5	540	153.954	Cargo A	Cytoplasm		27.603		A1	228
SRP21_YEAST	Signal recognition particle subunit SRP21 (Signal recognition particle 21 kDa protein)	120	38	530	14.0151	Cargo A	Both		18.425		A1	795
BRX1_YEAST	Ribosome biogenesis protein BRX1	2300	200	520	2.56105	Cargo A	Nucleus		33.531		A1	2690
HOS3_YEAST	Histone deacetylase HOS3 (EC 3.5.1.98)	610	160	520	3.21679	Cargo A	Nucleus		79.2		A1	2282
PUF4_YEAST	Pumilio homology domain family member 4	670	26	520	20.3149	Cargo A			97.798		A1	628
PEX19_YEAST	Peroxisomal membrane protein import receptor PEX19 (Peroxin-19)	730	73	510	7.02181	Cargo A	Cytoplasm	BioGrid	38.706		A1	2632
AP18A_YEAST	Clathrin coat assembly protein AP180A	850	42	510	12.4288	Cargo A	Cytoplasm		71.66		A1	1370
AP1M1_YEAST	AP-1 complex subunit mu-1-I (Clathrin assembly protein complex 1 mu-1-I medium chain) (Clathrin coat assembly protein AP54) (Clathrin coat-associated protein AP54) (Golgi adaptor AP-1 54 kDa protein) (HA1 54 kDa subunit) (Mu(1)-adaptin) (Mu1-I-adaptin)	3600	180	490	2.77204	Cargo A	Cytoplasm		53.874		A1	2211
ELP1_YEAST	Elongator complex protein 1 (Gamma-toxin target 1) (Protein IKI3)	150	5.3	490	91.1346	Cargo A	Both		152.99		A1	2614
SA190_YEAST	SIT4-associating protein SAP190	3400	39	480	12.3422	Cargo A	Cytoplasm		117.098		A1	1094
ELP3_YEAST	Elongator complex protein 3 (EC 2.3.1.48) (Gamma-toxin target 3)	370	16	480	30.0229	Cargo A	Both		63.657		A1	2277
SLA1_YEAST	Actin cytoskeleton-regulatory complex protein SLA1	150	51	470	9.32959	Cargo A	Both		135.848		A1	903
LSM4_YEAST	U6 snRNA-associated Sm-like protein LSm4	3400	6.8	470	69.0649	Cargo A	Both		21.276		A1	1527
BECN1_YEAST	Vacuolar protein sorting-associated protein 30 (Autophagy-related protein 6)	3300	9.9	460	46.8485	Cargo A	Cytoplasm	BioGrid	63.261		A1	2281
SRO9_YEAST	RNA-binding protein SRO9 (Suppressor of RHO3 protein 9)	280	7.8	430	55.4603	Cargo A	Cytoplasm		48.06		A1	665
THG1_YEAST	tRNA(His) guanylyltransferase (EC 2.7.7.79) (tRNA-histidine guanylyltransferase)	2900	19	410	21.7295	Cargo A			27.757		A1	2010
JSN1_YEAST	Protein JSN1 (Pumilio homology domain family member 1)	180	13	410	30.8461	Cargo A			120.374		A1	1832
HSP79_YEAST	Heat shock protein homolog SSE2	110	3.8	410	109.541	Cargo A			77.621		A1	869
MAK11_YEAST	Protein MAK11 (Maintenance of killer protein 11)	2900	68	400	5.86203	Cargo A	Both		53.672		A1	504
VHS3_YEAST	Phosphopantothenoylcysteine decarboxylase subunit VHS3 (Viable in a HAL3 SIT4 background protein 3)	2900	11	400	35.7766	Cargo A			73.649		A1	2700
YBP1_YEAST	YAP1-binding protein 1 (Activator of YAP1)	2800	200	390	1.94582	Cargo A	Cytoplasm		77.741		A1	1238
IRC6_YEAST	Increased recombination centers protein 6	2800	72	390	5.42618	Cargo A			27.879		A1	1742
CSK21_YEAST	Casein kinase II subunit alpha (CK II subunit alpha) (EC 2.7.11.1)	380	12	390	32.384	Cargo A			44.668		A1	409
BEM1_YEAST	Bud emergence protein 1 (Suppressor of RHO3 protein 1)	180	4900	370	0.0585197	Cargo A	Cytoplasm		61.605		A1	741
SGN1_YEAST	RNA-binding protein SGN1	2700	50	370	7.53031	Cargo A	Cytoplasm		28.954		A1	1633
CSK22_YEAST	Casein kinase II subunit alpha' (CK II) (EC 2.7.11.1)	950	8.2	370	44.7082	Cargo A			39.404		A1	473
APD1_YEAST	Actin patches distal protein 1	2600	7.5	360	48.0064	Cargo A	Both		35.759		A1	1231
RS3A1_YEAST	40S ribosomal protein S1-A (RP10A)	2600	5	360	71.8551	Cargo A	Cytoplasm		28.743		A1	970
RIO1_YEAST	Serine/threonine-protein kinase RIO1 (EC 2.7.11.1) (Ribosomal RNA-processing protein 10)	2500	37	350	9.5231	Cargo A	Cytoplasm		56.122		A1	2827
PNO1_YEAST	Pre-rRNA-processing protein PNO1 (Partner of NOB1) (Ribosomal RNA-processing protein 20)	2500	7.9	350	44.2206	Cargo A	Both		30.332		A1	2982
ELP2_YEAST	Elongator complex protein 2 (Gamma-toxin target 2)	1400	3.8	350	91.595	Cargo A	Both		89.411		A1	1698
HRR25_YEAST	Casein kinase I homolog HRR25 (EC 2.7.11.1)	1500	46	340	7.44893	Cargo A	Both		57.34		A1	739
OTU2_YEAST	OTU domain-containing protein 2	2400	57	330	5.84167	Cargo A			36.113		A1	1310
STE11_YEAST	Serine/threonine-protein kinase STE11 (EC 2.7.11.25)	190	57	330	5.82021	Cargo A			80.721		A1	586
CEX1_YEAST	Cytoplasmic export protein 1	2400	6.6	330	50.4096	Cargo A	Cytoplasm		84.769		A1	2916
PRTB_YEAST	Cerevisin (EC 3.4.21.48) (Proteinase YSCB) (Vacuolar protease B) (PrB)	1700	52	320	6.099	Cargo A	Cytoplasm		69.621	ER	A1	254
SLA2_YEAST	Protein SLA2 (Transmembrane protein MOP2)	170	5.5	320	57.4328	Cargo A	Cytoplasm	BioGrid	108.911	TM	A1	961
RBS1_YEAST	RNA-binding suppressor of PAS kinase protein 1	2200	4900	300	0.0585197	Cargo A	Cytoplasm	BioGrid	51.957		A1	2498
PAT1_YEAST	DNA topoisomerase 2-associated protein PAT1 (Decapping activator and translational repressor PAT1) (Topoisomerase II-associated protein PAT1) (mRNA turnover protein 1)	1100	4.7	300	64.509	Cargo A	Both	BioGrid	88.511		A1	680
TSR1_YEAST	Ribosome biogenesis protein TSR1 (20S rRNA accumulation protein 1)	2100	16	290	18.0264	Cargo A	Both		90.748		A1	2630
UTP9_YEAST	U3 small nucleolar RNA-associated protein 9 (U3 snoRNA-associated protein 9) (U three protein 9) (U3 protein 9 required for transcription) (t-UTP9)	320	5.7	290	49.9485	Cargo A	Nucleus		65.271		A1	1382
SRP72_YEAST	Signal recognition particle subunit SRP72 (Signal recognition particle 72 kDa protein homolog)	350	61	280	4.56664	Cargo A	Both		73.541		A1	1282
SMY1_YEAST	Kinesin-related protein SMY1 (Suppressor protein SMY1)	2000	32	280	8.60005	Cargo A	Cytoplasm		73.799		A1	802
SA185_YEAST	SIT4-associating protein SAP185	2000	24	280	11.7905	Cargo A			121.403		A1	1645
RLM1_YEAST	Transcription factor RLM1	2000	220	270	1.24756	Cargo A	Nucleus		73.484		A1	2835
SKG3_YEAST	Protein SKG3 (Suppressor of lethality of KEX2-GAS1 double null mutant protein 3)	1900	35	270	7.50729	Cargo A	Cytoplasm		114.111		A1	2552
UBC8_YEAST	Ubiquitin-conjugating enzyme E2-24 kDa (EC 6.3.2.19) (Glucose-induced degradation protein 3) (Ubiquitin carrier protein) (Ubiquitin-protein ligase)	1800	33	250	7.61489	Cargo A	Cytoplasm		24.633		A1	724
VPS29_YEAST	Vacuolar protein sorting-associated protein 29 (Carboxypeptidase Y-deficient protein 11) (Vesicle protein sorting 29)	690	4	250	62.7877	Cargo A			31.013		A1	1318
PEP8_YEAST	Carboxypeptidase Y-deficient protein 8 (Vacuolar protein sorting-associated protein 26) (Vacuolar protein-targeting protein 4)	1700	4100	240	0.0585197	Cargo A			42.547		A1	1564
APM2_YEAST	Adaptin medium chain homolog APM2 (Adaptin-mu1-II)	1700	130	240	1.88886	Cargo A	Cytoplasm		69.99		A1	1290
YAT2_YEAST	Carnitine O-acetyltransferase YAT2 (EC 2.3.1.7)	1700	23	240	10.72	Cargo A	Cytoplasm		103.334		A1	1505
PPZ1_YEAST	Serine/threonine-protein phosphatase PP-Z1 (EC 3.1.3.16)	1700	8.5	240	28.6403	Cargo A			77.491		A1	693
KTI12_YEAST	Protein KTI12 (Gamma-toxin target protein 4) (Killer toxin insensitivity protein 12)	160	7.4	240	32.2092	Cargo A	Both		35.322		A1	1003
GFD1_YEAST	mRNA transport factor GFD1 (Good for full DBP5 activity protein 1)	1700	4000	230	0.0585197	Cargo A	Both		21.571		A1	2464
KRR1_YEAST	KRR1 small subunit processome component (KRR-R motif-containing protein 1) (Ribosomal RNA assembly protein KRR1)	1600	3900	230	0.0585197	Cargo A	Nucleus		37.159		A1	669
HAS1_YEAST	ATP-dependent RNA helicase HAS1 (EC 3.6.4.13) (Helicase associated with SET1 protein 1)	1700	54	230	4.34934	Cargo A	Nucleus		56.717		A1	2334
PMA1_YEAST	Plasma membrane ATPase 1 (EC 3.6.3.6) (Proton pump 1)	1700	16	230	14.9998	Cargo A	Cytoplasm		99.619	TM	A1	139
LSG1_YEAST	Large subunit GTPase 1 (EC 3.6.1.-)	1700	14	230	16.8576	Cargo A	Cytoplasm		72.728		A1	1986
NAT1_YEAST	N-terminal acetyltransferase A complex subunit NAT1 (NatA complex subunit NAT1) (Amino-terminal, alpha-amino, acetyltransferase 1)	1700	5.5	230	42.2215	Cargo A	Cytoplasm		98.905		A1	353
SUB1_YEAST	RNA polymerase II transcriptional coactivator SUB1	1600	21	210	10.3861	Cargo A	Nucleus		33.102		A1	2163
RPF1_YEAST	Ribosome production factor 1 (Ribosome biogenesis protein RPF1)	1400	3400	200	0.0585197	Cargo A	Nucleus		35.121		A1	1343
CACM_YEAST	Putative mitochondrial carnitine O-acetyltransferase (EC 2.3.1.7)	380	840	200	0.232331	Cargo A	Cytoplasm		77.766		A1	2191
ATG1_YEAST	Serine/threonine-protein kinase ATG1 (EC 2.7.11.1) (Autophagy protein 3) (Autophagy-related protein 1) (Cytoplasm to vacuole targeting protein 10)	1500	180	200	1.14691	Cargo A	Cytoplasm		101.717		A1	1967
NOP16_YEAST	Nucleolar protein 16	1400	44	200	4.53137	Cargo A	Nucleus		26.901		A1	1498
SEC65_YEAST	Signal recognition particle subunit SEC65	100	26	200	7.71039	Cargo A	Cytoplasm		31.17		A1	746
WHI4_YEAST	Protein WHI4	1400	24	200	8.28092	Cargo A	Cytoplasm		70.69		A1	2649
BRE5_YEAST	UBP3-associated protein BRE5 (Brefeldin-A sensitivity protein 5)	1500	13	200	15.9291	Cargo A			57.674		A1	2084
ELF1_YEAST	Transcription elongation factor 1	1400	6.9	200	29.2154	Cargo A	Nucleus		16.157		A1	1065
SIS2_YEAST	Phosphopantothenoylcysteine decarboxylase subunit SIS2 (Halotolerance protein HAL3) (Sit4 suppressor 2)	1400	6.2	200	31.9307	Cargo A	Both		62.478		A1	1056
CSK2B_YEAST	Casein kinase II subunit beta (CK II beta)	1500	3.3	200	61.3138	Cargo A			32.265		A1	1747
AATM_YEAST	Aspartate aminotransferase, mitochondrial (EC 2.6.1.1) (Transaminase A)	140	3200	190	0.0585197	Cargo A	Cytoplasm		51.795	MT	A1	2230
CDC24_YEAST	Cell division control protein 24 (Calcium regulatory protein)	1400	83	190	2.33595	Cargo A			96.94		A1	328
RLP7_YEAST	Ribosome biogenesis protein RLP7 (Ribosomal protein L7-like)	1400	25	190	7.49684	Cargo A	Nucleus		36.559		A1	1642
CAB3_YEAST	Coenzyme A biosynthesis protein 3	1400	12	190	16.7015	Cargo A	Cytoplasm		65.238		A1	1072
SKP2_YEAST	F-box protein SKP2	1300	110	180	1.71478	Cargo A	Cytoplasm		88.942		A1	1695
YTM1_YEAST	Ribosome biogenesis protein YTM1 (Microtubule-associated protein YTM1)	1300	17	180	10.681	Cargo A	Nucleus		51.359		A1	2764
PAH1_YEAST	Phosphatidic acid phosphohydrolase 1 (PAP1) (EC 3.1.3.4) (Protein SMP2)	1300	12	180	14.4302	Cargo A	Both		95.031		A1	859
YP247_YEAST	WD repeat-containing protein YPL247C	290	230	170	0.720572	Cargo A	Both		57.324		A1	2945
KRE33_YEAST	UPF0202 protein KRE33 (Killer toxin-resistance protein 33)	1200	11	170	16.1046	Cargo A	Nucleus		119.348		A1	2135
RPB3_YEAST	DNA-directed RNA polymerase II subunit RPB3 (RNA polymerase II subunit 3) (RNA polymerase II subunit B3) (B44.5) (DNA-directed RNA polymerase II 45 kDa polypeptide)	1200	10	170	16.0913	Cargo A	Nucleus		35.298		A1	418
FRA1_YEAST	Putative Xaa-Pro aminopeptidase FRA1 (EC 3.4.11.9) (Fe repressor of activation 1)	1200	5	170	34.1435	Cargo A	Cytoplasm		84.924		A1	2657
RL16A_YEAST	60S ribosomal protein L16-A (L13a) (L21) (RP22) (YL15)	1300	4	170	44.0037	Cargo A	Cytoplasm		22.201		A1	698
YKC3_YEAST	Uncharacterized protein YKL023W	1100	2700	160	0.0585197	Cargo A	Cytoplasm		32.293		A1	1083
GPB2_YEAST	Guanine nucleotide-binding protein subunit beta 2 (Gbeta mimic kelch protein 2)	120	220	160	0.739704	Cargo A	Cytoplasm		98.656		A1	1457
PP2C4_YEAST	Protein phosphatase 2C homolog 4 (PP2C-4) (EC 3.1.3.16)	1200	100	160	1.63044	Cargo A			44.176		A1	1161
VPS35_YEAST	Vacuolar protein sorting-associated protein 35 (Vacuolar protein-targeting protein 7)	1200	17	160	9.62922	Cargo A	Cytoplasm		109.142		A1	983
NMD2_YEAST	Nonsense-mediated mRNA decay protein 2 (Up-frameshift suppressor 2)	1100	12	160	13.2309	Cargo A	Cytoplasm		126.747		A1	1339
PAR32_YEAST	Protein PAR32 (Protein phosphorylated after rapamycin 32)	1200	11	160	14.7243	Cargo A	Cytoplasm		31.886		A1	2941
MCM1_YEAST	Pheromone receptor transcription factor (GRM/PRTF protein)	1100	5.4	160	29.3105	Cargo A	Nucleus		32.802		A1	334
CIC1_YEAST	Proteasome-interacting protein CIC1 (Core interacting component 1)	130	5.1	160	30.5239	Cargo A	Nucleus		42.53		A1	1327
NAA30_YEAST	N-alpha-acetyltransferase 30 (EC 2.3.1.88) (L-A virus GAG protein N-acetyltransferase subunit MAK3) (Maintenance of killer protein 3) (N-terminal acetyltransferase C complex catalytic subunit MAK3) (NatC complex subunit MAK3) (NatC catalytic subunit)	1100	4.9	160	32.3988	Cargo A	Both		20.457		A1	2331
GIR2_YEAST	Protein GIR2 (DRG family-regulatory protein 2) (Genetically interacts with ribosomal genes protein 2)	240	3	160	53.359	Cargo A			31.031		A1	2355
RRP1_YEAST	Ribosomal RNA-processing protein 1	1100	2600	150	0.0585197	Cargo A	Nucleus		33.203		A1	1014
YAK1_YEAST	Dual specificity protein kinase YAK1 (EC 2.7.12.1)	1000	1300	150	0.110048	Cargo A	Both		91.245		A1	375
SEC16_YEAST	COPII coat assembly protein SEC16 (Protein transport protein SEC16)	1000	42	150	3.66403	Cargo A	Cytoplasm		241.696		A1	1867
MRT4_YEAST	Ribosome assembly factor MRT4 (mRNA turnover protein 4)	1100	6	150	25.7042	Cargo A	Both		27.058		A1	940
ADD37_YEAST	Alpha1-proteinase inhibitor-degradation deficient protein 37	1100	5.7	150	26.2808	Cargo A	Cytoplasm		22.11		A1	2309
SVL3_YEAST	Styryl dye vacuolar localization protein 3	4600	5.7	150	26.2535	Cargo A	Cytoplasm		92.144		A1	2295
YRA1_YEAST	RNA annealing protein YRA1	1100	5.2	150	29.4572	Cargo A	Nucleus		24.956		A1	2812
ARX1_YEAST	Probable metalloprotease ARX1 (EC 3.-.-.-) (Associated with ribosomal export complex protein 1)	170	3.9	150	37.3519	Cargo A	Both	BioGrid	65.213		A1	2372
IMP4_YEAST	U3 small nucleolar ribonucleoprotein protein IMP4 (U3 snoRNP protein IMP4) (Interacting with MPP10 protein 4)	980	2300	140	0.0585197	Cargo A	Nucleus		33.482		A1	2144
PAM1_YEAST	Protein PAM1	1000	65	140	2.23342	Cargo A			92.872		A1	1136
TSR3_YEAST	Ribosome biogenesis protein TSR3 (20S rRNA accumulation protein 3)	1000	42	140	3.41232	Cargo A	Both		35.686		A1	2788
DPO5_YEAST	DNA polymerase V (POL V) (EC 2.7.7.7)	980	7.8	140	17.5489	Cargo A			115.894		A1	1489
EBS1_YEAST	Protein EBS1 (EST1-like BCY1 suppressor 1)	930	2200	130	0.0585197	Cargo A	Nucleus		100		A1	2328
RFC3_YEAST	Replication factor C subunit 3 (Replication factor C3) (Activator 1 40 kDa subunit)	400	60	130	2.21415	Cargo A	Nucleus		38.204		A1	1275
NOP12_YEAST	Nucleolar protein 12	920	31	130	4.06134	Cargo A	Nucleus		51.942		A1	2682
SRP14_YEAST	Signal recognition particle subunit SRP14 (Signal recognition particle 14 kDa protein homolog)	960	12	130	11.4425	Cargo A	Both		16.43		A1	1408
RIX7_YEAST	Ribosome biogenesis ATPase RIX7	920	6.1	130	21.0889	Cargo A	Nucleus		93.069		A1	2659
KRI1_YEAST	Protein KRI1 (KRR1-interacting protein 1)	970	5.7	130	23.56	Cargo A	Nucleus		68.654		A1	1697
NAT5_YEAST	N-terminal acetyltransferase A complex subunit NAT5 (NatA complex subunit NAT5) (EC 2.3.1.-)	930	4.1	130	31.759	Cargo A	Cytoplasm		19.727		A1	2718
REI1_YEAST	Cytoplasmic 60S subunit biogenesis factor REI1 (Required for isotropic bud growth protein 1) (pre-60S factor REI1)	890	2100	120	0.0585197	Cargo A	Cytoplasm		45.862		A1	1250
LCP5_YEAST	U3 small nucleolar ribonucleoprotein protein LCP5	860	2000	120	0.0585197	Cargo A	Nucleus		40.794		A1	1530
YHP7_YEAST	Uncharacterized protein YHR097C	870	640	120	0.188059	Cargo A	Both		40.663		A1	1346
HAL5_YEAST	Serine/threonine-protein kinase HAL5 (EC 2.7.11.1) (Halotolerance protein 5)	890	22	120	5.5195	Cargo A			95.455		A1	1406
MLP2_YEAST	Protein MLP2 (Myosin-like protein 2)	320	22	120	5.48017	Cargo A	Both		195.141		A1	1588
MRS1_YEAST	Mitochondrial RNA-splicing protein MRS1	870	10	120	11.608	Cargo A	Cytoplasm		41.29		A1	213
SERA_YEAST	D-3-phosphoglycerate dehydrogenase 1 (3-PGDH 1) (EC 1.1.1.95)	120	4	120	31.6677	Cargo A			51.193		A1	1523
RL4A_YEAST	60S ribosomal protein L4-A (L2) (RP2) (YL2)	870	3.7	120	32.7734	Cargo A	Cytoplasm		39.092		A1	315
CSK2C_YEAST	Casein kinase II subunit beta' (CK II beta')	850	3.5	120	33.293	Cargo A			29.842		A1	1400
ROD1_YEAST	Protein ROD1 (Resistance to o-dinitrobenzene protein 1)	810	1900	110	0.0585197	Cargo A	Cytoplasm		92.349		A1	2269
ASR1_YEAST	Alcohol-sensitive RING finger protein 1	760	1800	110	0.0585197	Cargo A	Both		33.347		A1	2621
UBP7_YEAST	Ubiquitin carboxyl-terminal hydrolase 7 (EC 3.4.19.12) (Deubiquitinating enzyme 7) (Ubiquitin thioesterase 7) (Ubiquitin-specific-processing protease 7)	830	120	110	0.987968	Cargo A	Cytoplasm		123.134		A1	1585
NOB1_YEAST	20S-pre-rRNA D-site endonuclease NOB1 (EC 3.1.-.-) (NIN1-binding protein) (Pre-rRNA-processing endonuclease NOB1)	760	43	110	2.48701	Cargo A	Both		51.742		A1	2701
PRP38_YEAST	Pre-mRNA-splicing factor 38 (Pre-mRNA-processing factor 38)	780	23	110	4.73962	Cargo A	Nucleus		27.967		A1	2208
RTK1_YEAST	Probable serine/threonine-protein kinase RTK1 (EC 2.7.11.1) (Ribosome biogenesis and tRNA synthetase-associated kinase 1)	830	11	110	10.6311	Cargo A			69.615		A1	2790
VPS5_YEAST	Vacuolar protein sorting-associated protein 5 (Carboxypeptidase Y-deficient protein 10) (Vacuolar protein-targeting protein 5)	780	11	110	9.97799	Cargo A	Cytoplasm		76.484		A1	2974
SKY1_YEAST	Serine/threonine-protein kinase SKY1 (SRPK) (EC 2.7.11.1)	800	7.8	110	14.2055	Cargo A			83.238		A1	2343
RRP15_YEAST	Ribosomal RNA-processing protein 15	780	5.3	110	20.5029	Cargo A	Nucleus		28.212		A1	2579
NOP13_YEAST	Nucleolar protein 13	810	5	110	22.5535	Cargo A	Nucleus		45.609		A1	2119
HRK1_YEAST	Serine/threonine-protein kinase HRK1 (EC 2.7.11.1) (Hygromycin resistance kinase 1)	800	4.6	110	24.2069	Cargo A	Cytoplasm		85.696		A1	2722
ERB1_YEAST	Ribosome biogenesis protein ERB1 (Eukaryotic ribosome biogenesis protein 1)	780	4.2	110	25.9874	Cargo A	Nucleus		91.705		A1	2451
PAP_YEAST	Poly(A) polymerase (PAP) (EC 2.7.7.19) (Polynucleotide adenylyltransferase)	200	3.8	110	28.4725	Cargo A	Nucleus		64.552		A1	744
UTR1_YEAST	NAD(+) kinase (EC 2.7.1.23) (Unknown transcript 1 protein)	800	3.8	110	29.6305	Cargo A			59.469		A1	521
INP51_YEAST	Phosphatidylinositol 4,5-bisphosphate 5-phosphatase INP51 (EC 3.1.3.36) (Synaptojanin-like protein 1)	730	140	100	0.717685	Cargo A	Cytoplasm		108.43		A1	1632
DSF2_YEAST	Protein DSF2 (Deletion suppressor of MPT5 mutation protein 2)	740	43	100	2.40664	Cargo A			82.336		A1	1204
NOG1_YEAST	Nucleolar GTP-binding protein 1	750	8.8	100	11.8584	Cargo A	Nucleus		74.41		A1	2276
SYH1_YEAST	SMY2 homolog 2	750	6.3	100	16.7202	Cargo A	Cytoplasm		94.357		A1	2273
YDR86_YEAST	Uncharacterized protein YDR186C	710	90	99	1.10618	Cargo A	Cytoplasm		98.331		A1	2384
IF4F2_YEAST	Eukaryotic initiation factor 4F subunit p130 (eIF-4F p130) (eIF4F p130) (eIF4G2) (mRNA cap-binding protein complex subunit p130)	710	5.5	99	18.017	Cargo A	Cytoplasm		103.899		A1	1474
CBF5_YEAST	H/ACA ribonucleoprotein complex subunit 4 (EC 5.4.99.-) (Centromere-binding factor 5) (Centromere/microtubule-binding protein CBF5) (H/ACA snoRNP protein CBF5) (Small nucleolar RNP protein CBF5) (p64')	710	17	98	5.88903	Cargo A	Both		54.705		A1	954
ESF1_YEAST	Pre-rRNA-processing protein ESF1 (18S rRNA factor 1)	700	7.7	98	12.7752	Cargo A	Nucleus		72.41		A1	2559
SAP1_YEAST	Protein SAP1 (SIN1-associated protein)	700	1700	97	0.0585197	Cargo A			100.332		A1	1478
MRE11_YEAST	Double-strand break repair protein MRE11	700	26	97	3.77717	Cargo A	Nucleus		77.65		A1	908
REH1_YEAST	Cytoplasmic 60S subunit biogenesis factor REH1 (REI1-homolog 1) (pre-60S factor REH1)	690	130	96	0.731535	Cargo A	Cytoplasm		49.69		A1	2616
NSA1_YEAST	Ribosome biogenesis protein NSA1 (NOP7-associated protein 1)	690	180	95	0.530773	Cargo A	Nucleus		51.907		A1	1981
DBF2_YEAST	Cell cycle protein kinase DBF2 (EC 2.7.11.1) (Dumbbell forming protein 2)	690	17	95	5.54072	Cargo A	Both		66.148		A1	548
FKBP4_YEAST	FK506-binding protein 4 (EC 5.2.1.8) (Peptidyl-prolyl cis-trans isomerase) (PPIase) (Rotamase)	140	3.7	95	25.8033	Cargo A	Nucleus		43.903		A1	2540
YD239_YEAST	Uncharacterized protein YDR239C	660	63	91	1.46034	Cargo A	Cytoplasm		86.433		A1	2362
STU2_YEAST	Protein STU2 (Suppressor of tubulin 2)	650	14	90	6.24413	Cargo A	Cytoplasm		100.918		A1	1760
TMA16_YEAST	Translation machinery-associated protein 16	630	13	88	6.85913	Cargo A	Nucleus		20.839		A1	2717
SNF6_YEAST	Transcription regulatory protein SNF6 (SWI/SNF complex component SNF6)	630	1500	87	0.0585197	Cargo A	Nucleus		37.607		A1	459
NOC2_YEAST	Nucleolar complex protein 2	620	4.6	87	19.0002	Cargo A	Nucleus		81.601		A1	1467
EBP2_YEAST	rRNA-processing protein EBP2 (EBNA1-binding protein homolog)	620	72	86	1.19653	Cargo A	Nucleus		49.734		A1	1064
PVH1_YEAST	Tyrosine-protein phosphatase YVH1 (PTPase YVH1) (EC 3.1.3.48)	620	7.5	86	11.5978	Cargo A			41.185		A1	2243
IMDH2_YEAST	Inosine-5'-monophosphate dehydrogenase 2 (IMP dehydrogenase 2) (IMPD 2) (IMPDH 2) (EC 1.1.1.205)	610	36	85	2.35015	Cargo A	Cytoplasm		56.53		A1	1288
UFO1_YEAST	Ubiquitin ligase complex F-box protein UFO1	610	34	85	2.49832	Cargo A			76.86		A1	2442
AP2S_YEAST	AP-2 complex subunit sigma (Adaptin small chain) (Clathrin assembly protein 2 sigma small chain) (Clathrin coat assembly protein AP17) (Clathrin coat-associated protein AP17) (Plasma membrane adaptor AP-2 17 kDa protein) (Sigma2-adaptin)	610	31	85	2.7871	Cargo A	Cytoplasm		17.373		A1	2201
RT103_YEAST	Regulator of Ty1 transposition protein 103	610	84	84	1.00232	Cargo A	Nucleus	BioGrid	46.488		A1	2491
SSF1_YEAST	Ribosome biogenesis protein SSF1	610	8	84	10.5	Cargo A	Nucleus		51.764		A1	1333
VTC4_YEAST	Vacuolar transporter chaperone 4 (Phosphate metabolism protein 3)	590	2000	82	0.0412228	Cargo A	Cytoplasm		83.155	TM	A1	1805
MKK2_YEAST	MAP kinase kinase MKK2/SSP33 (EC 2.7.12.2)	590	1400	82	0.0585197	Cargo A			56.758		A1	837
DBP4_YEAST	ATP-dependent RNA helicase HCA4 (EC 3.6.4.13) (DEAD box protein 4) (Helicase CA4) (Helicase UF1)	590	22	82	3.75384	Cargo A	Nucleus		87.193		A1	500
DIM1_YEAST	Dimethyladenosine transferase (EC 2.1.1.183) (18S rRNA (adenine(1779)-N(6)/adenine(1780)-N(6))-dimethyltransferase) (18S rRNA dimethylase) (S-adenosylmethionine-6-N', N'-adenosyl(rRNA) dimethyltransferase)	590	16	82	5.02247	Cargo A	Both		35.951		A1	1677
VPS17_YEAST	Vacuolar protein sorting-associated protein 17 (Carboxypeptidase Y-deficient protein 21)	590	30	81	2.69565	Cargo A	Cytoplasm		63.204		A1	935
NMD4_YEAST	Nonsense-mediated decay protein 4	570	50	79	1.58799	Cargo A	Cytoplasm		25.286		A1	2803
SLF1_YEAST	Protein SLF1	570	47	79	1.67608	Cargo A			50.943		A1	2770
NOL10_YEAST	Ribosome biogenesis protein ENP2 (Essential nuclear protein 2)	570	21	79	3.75415	Cargo A	Nucleus		81.734		A1	1860
MAK5_YEAST	ATP-dependent RNA helicase MAK5 (EC 3.6.4.13) (Maintenance of killer protein 5)	570	43	78	1.84001	Cargo A	Nucleus		87.048		A1	1164
ALB1_YEAST	Ribosome biogenesis protein ALB1	570	12	78	6.80709	Cargo A	Both		19.287		A1	1787
AP2M_YEAST	AP-2 complex subunit mu (Adaptin medium chain APM4) (Clathrin assembly protein complex 2 mu medium chain) (Clathrin coat assembly protein AP50) (Clathrin coat-associated protein AP50) (Mu2-adaptin) (Plasma membrane adaptor AP-2 50 kDa protein)	560	1300	77	0.0585197	Cargo A	Cytoplasm		55.387		A1	2979
MET8_YEAST	Siroheme biosynthesis protein MET8 [Includes: Precorrin-2 dehydrogenase (EC 1.3.1.76); Sirohydrochlorin ferrochelatase (EC 4.99.1.4)]	560	4.2	77	18.2277	Cargo A			31.918		A1	410
LOC1_YEAST	60S ribosomal subunit assembly/export protein LOC1 (Localization of ASH1 mRNA protein 1)	540	11	75	6.95814	Cargo A	Nucleus		23.59		A1	1728
PIG2_YEAST	GSY2-interacting protein PIG2	250	1300	73	0.0585197	Cargo A			61.938		A1	1552
PWP2_YEAST	Periodic tryptophan protein 2 (U three protein 1) (U3 small nucleolar RNA-associated protein 1) (U3 snoRNA-associated protein 1)	180	5.4	73	13.7295	Cargo A	Nucleus		103.983		A1	677
AP2A_YEAST	AP-2 complex subunit alpha (Alpha-adaptin) (Clathrin assembly protein complex 2 alpha large chain) (Clathrin assembly protein large alpha chain)	520	23	72	3.16014	Cargo A	Cytoplasm		115.012		A1	1147
PRPD_YEAST	Probable 2-methylcitrate dehydratase (EC 4.2.1.79)	220	3.6	72	20.0293	Cargo A			57.684		A1	2906
GPN2_YEAST	GPN-loop GTPase 2 (EC 3.6.5.-) (ATP-binding domain 1 family member B homolog)	510	12	70	6.08355	Cargo A	Cytoplasm		39.724		A1	2721
YML9_YEAST	Uncharacterized protein YML119W	490	1200	68	0.0585197	Cargo A			40.06		A1	2305
ATG2_YEAST	Autophagy-related protein 2 (Sporulation-specific protein 72)	490	86	68	0.791264	Cargo A	Cytoplasm		178.414		A1	2105
CA120_YEAST	CCR4-NOT transcriptional complex subunit CAF120 (120 kDa CCR4-associated factor)	930	35	68	1.94566	Cargo A	Both		118.28		A1	2095
VID27_YEAST	Vacuolar import and degradation protein 27	490	4.8	68	14.356	Cargo A	Cytoplasm		88.846		A1	1544
INP53_YEAST	Polyphosphatidylinositol phosphatase INP53 (Suppressor of PMA1 protein 2) (Synaptojanin-like protein 3) [Includes: SAC1-like phosphoinositide phosphatase (EC 3.1.3.-); Phosphatidylinositol 4,5-bisphosphate 5-phosphatase (EC 3.1.3.36)]	350	4.4	68	15.4359	Cargo A	Cytoplasm		124.577		A1	2849
MAK16_YEAST	Protein MAK16 (Maintenance of killer protein 16)	460	1100	64	0.0585197	Cargo A	Nucleus		35.696		A1	320
IBD2_YEAST	Protein IBD2 (Inhibition of bud division protein 2)	450	1100	63	0.0585197	Cargo A	Cytoplasm		40.016		A1	2124
RPF2_YEAST	Ribosome biogenesis protein RPF2	450	18	63	3.40795	Cargo A	Nucleus		39.599		A1	1111
BUD27_YEAST	Bud site selection protein 27	460	3.3	63	19.4184	Cargo A	Cytoplasm		91.422		A1	1722
ATG17_YEAST	Autophagy-related protein 17	450	66	62	0.942401	Cargo A	Cytoplasm		48.656		A1	2566
RL9B_YEAST	60S ribosomal protein L9-B (L8) (RP24) (YL11)	440	5.1	62	12.2033	Cargo A	Cytoplasm		21.657		A1	1919
CSN12_YEAST	Cop9 signalosome complex subunit 12	440	1100	61	0.0585197	Cargo A	Both		49.482		A1	1831
MTW1_YEAST	Kinetochore-associated protein MTW1 (Mis12-like protein)	440	43	61	1.44309	Cargo A	Nucleus		33.243		A1	1464
DMA2_YEAST	E3 ubiquitin-protein ligase DMA2 (EC 6.3.2.-) (Checkpoint forkhead associated with RING domains-containing protein 1) (Defective in mitotic arrest protein 2)	430	7.8	60	7.65063	Cargo A	Cytoplasm		57.584		A1	2139
YK03_YEAST	Uncharacterized protein YKR023W	420	120	59	0.505103	Cargo A			60.799		A1	1090
BIM1_YEAST	Protein BIM1	420	5.7	59	10.3697	Cargo A	Cytoplasm		38.362		A1	1502
ARP9_YEAST	Actin-like protein ARP9 (Chromatin structure-remodeling complex protein ARP9) (SWI/SNF complex component ARP9)	180	3	59	20.0605	Cargo A	Nucleus		53.074		A1	2481
GLN3_YEAST	Nitrogen regulatory protein GLN3	420	1000	58	0.0585197	Cargo A	Nucleus	BioGrid	79.383		A1	454
BFR2_YEAST	Protein BFR2 (Brefeldin A resistance protein 2)	420	52	58	1.1377	Cargo A	Nucleus	BioGrid	61.203		A1	2595
SSD1_YEAST	Protein SSD1 (Protein SRK1)	420	11	58	5.26576	Cargo A			139.954		A1	598
YG5B_YEAST	Uncharacterized RNA-binding protein YGR250C	420	7.1	58	8.14672	Cargo A			89.513		A1	2048
ECM1_YEAST	Shuttling pre-60S factor ECM1 (Extracellular mutant protein 1) (Protein SIM1)	410	49	57	1.17866	Cargo A	Both		23.891		A1	1456
TAF6_YEAST	Transcription initiation factor TFIID subunit 6 (TBP-associated factor 6) (TBP-associated factor 60 kDa) (TAFII-60) (TAFII60)	170	8.3	57	6.88449	Cargo A	Nucleus		57.902		A1	1942
NOG2_YEAST	Nucleolar GTP-binding protein 2	400	23	56	2.48311	Cargo A	Nucleus		55.489		A1	2085
BUG1_YEAST	Binder of USO1 and GRH1 protein 1	400	12	55	4.52419	Cargo A	Cytoplasm		38.295		A1	2825
PRP19_YEAST	Pre-mRNA-processing factor 19 (EC 6.3.2.-)	400	3.5	55	15.9532	Cargo A	Nucleus		56.57		A1	849
BOI2_YEAST	Protein BOI2 (Protein BEB1)	390	69	54	0.776829	Cargo A	Cytoplasm		115.688		A1	1485
PBP4_YEAST	Protein PBP4 (PBP1-binding protein 4)	380	150	53	0.352725	Cargo A	Both		19.881		A1	2629
ACA2_YEAST	ATF/CREB activator 2 (Chromosome stability protein CST6)	380	16	53	3.34093	Cargo A	Nucleus		65.264		A1	1625
SWI3_YEAST	SWI/SNF complex subunit SWI3 (Transcription factor TYE2) (Transcription regulatory protein SWI3)	380	8.5	53	6.23695	Cargo A	Nucleus		92.926		A1	870
UBP3_YEAST	Ubiquitin carboxyl-terminal hydrolase 3 (EC 3.4.19.12) (Deubiquitinating enzyme 3) (Ubiquitin thioesterase 3) (Ubiquitin-specific-processing protease 3)	380	5.1	53	10.4454	Cargo A			101.917		A1	2223
PAL1_YEAST	Protein PAL1 (Pears and lemons protein 1)	380	110	52	0.453972	Cargo A	Cytoplasm		54.996		A1	2487
NOP14_YEAST	Nucleolar complex protein 14 (U three protein 2) (U3 small nucleolar RNA-associated protein 2) (U3 snoRNA-associated protein 2)	380	12	52	4.3644	Cargo A	Nucleus		94.302		A1	2980
HAL4_YEAST	Serine/threonine-protein kinase HAL4/SAT4 (EC 2.7.11.1) (Halotolerance protein 4)	370	870	51	0.0585197	Cargo A			66.666		A1	625
IMPX_YEAST	Sugar utilization regulatory protein IMP2	370	17	51	3.0108	Cargo A			39.071		A1	798
EAF3_YEAST	Chromatin modification-related protein EAF3 (ESA1-associated factor 3)	360	58	50	0.857898	Cargo A	Nucleus		45.203		A1	2908
RM03_YEAST	54S ribosomal protein L3, mitochondrial (YmL3)	360	21	50	2.39228	Cargo A	Cytoplasm		44	MT	A1	1119
DED1_YEAST	ATP-dependent RNA helicase DED1 (EC 3.6.4.13) (DEAD box protein 1)	20	83	36000	431.071	Cargo A	Cytoplasm		65.553		A2	176
YRB30_YEAST	Ran-specific GTPase-activating protein 30 (Ran-binding protein 30) (RANBP30)	5	460	4100	8.99954	Cargo A	Both		50.296		A2	1968
RIA1_YEAST	Ribosome assembly protein 1 (EC 3.6.5.-) (EF-2-like GTPase) (Elongation factor-like 1)	20	68	3600	53.242	Cargo A	Cytoplasm		124.464		A2	2125
HST2_YEAST	NAD-dependent protein deacetylase HST2 (EC 3.5.1.-) (Homologous to SIR2 protein 2) (Regulatory protein SIR2 homolog 2)	18	710	3200	4.60433	Cargo A	Both	NESdb	39.979		A2	2075
IVY1_YEAST	Protein IVY1 (Interaction with VPS33 and YPT7 protein 1)	27	1700	2600	1.50575	Cargo A	Cytoplasm	BioGrid	49.976		A2	2470
ENT5_YEAST	Epsin-5	58	110	1900	17.3476	Cargo A	Cytoplasm		47.321		A2	2356
MCM4_YEAST	DNA replication licensing factor MCM4 (EC 3.6.4.12) (Cell division control protein 54)	19	52	1700	32.565	Cargo A	Nucleus		105.003		A2	758
RTR2_YEAST	RNA polymerase II subunit B1 CTD phosphatase RTR2 (EC 3.1.3.16) (RNA polymerase II-associated protein 2 homolog RTR2) (Regulator of transcription 2)	14	140	1600	11.5011	Cargo A	Both		22.541		A2	2888
LSB3_YEAST	LAS seventeen-binding protein 3 (LAS17-binding protein 3)	76	360	1400	4.02381	Cargo A	Cytoplasm	BioGrid	49.344		A2	1738
DBF20_YEAST	Serine/threonine-protein kinase DBF20 (EC 2.7.11.1)	59	90	940	10.4134	Cargo A			65.88		A2	788
CHI2_YEAST	Sporulation-specific chitinase 2 (EC 3.2.1.14)	1.6	4900	630	0.0949345	Cargo A	Other		59.118	ER	A2	2560
NAB6_YEAST	RNA-binding protein NAB6 (Nucleic acid-binding protein 6)	39	61	450	7.42482	Cargo A	Cytoplasm	BioGrid	126.139		A2	2349
PEA2_YEAST	Protein PEA2 (Protein PPF2)	54	60	450	7.60397	Cargo A			48.165		A2	1536
SRP54_YEAST	Signal recognition particle subunit SRP54 (Signal recognition particle 54 kDa protein homolog)	19	4900	290	0.0585197	Cargo A	Cytoplasm		59.624		A2	494
SAP4_YEAST	SIT4-associating protein SAP4	21	350	290	0.837221	Cargo A			94.729		A2	1940
NUD1_YEAST	Protein NUD1	3.9	4300	250	0.0585197	Cargo A	Both		94.104		A2	791
PUF2_YEAST	mRNA-binding protein PUF2 (Pumilio homology domain family member 2)	58	80	180	2.29896	Cargo A	Cytoplasm		119.508		A2	2834
CNM67_YEAST	Chaotic nuclear migration protein 67	3.2	410	170	0.419102	Cargo A	Cytoplasm		67.4		A2	2110
KIN2_YEAST	Serine/threonine-protein kinase KIN2 (EC 2.7.11.1)	6.8	72	51	0.708111	Cargo A	Cytoplasm		128.338		A2	357
HSP75_YEAST	Heat shock protein SSB1 (Cold-inducible protein YG101)	12	20	140000	6903.29	Cargo B	Cytoplasm	NESdb	66.602		B1_1	329
SEC24_YEAST	Protein transport protein SEC24 (Abnormal nuclear morphology 1)	11	39	11000	281.23	Cargo B	Cytoplasm		103.636		B1_1	1602
SEC23_YEAST	Protein transport protein SEC23	15	29	8500	296.39	Cargo B	Cytoplasm		85.385		B1_1	393
SYFA_YEAST	Phenylalanine--tRNA ligase alpha subunit (EC 6.1.1.20) (Phenylalanyl-tRNA synthetase alpha subunit) (PheRS)	21	16	7900	500.562	Cargo B	Cytoplasm		57.511		B1_1	402
IF4B_YEAST	Eukaryotic translation initiation factor 4B (eIF-4B)	41	17	7700	468.555	Cargo B			48.522		B1_1	989
SYFB_YEAST	Phenylalanine--tRNA ligase beta subunit (EC 6.1.1.20) (Phenylalanyl-tRNA synthetase beta subunit) (PheRS)	25	11	6000	569.841	Cargo B	Cytoplasm		67.365		B1_1	401
HSP76_YEAST	Heat shock protein SSB2	12	13	5100	409.638	Cargo B	Cytoplasm		66.595		B1_1	1543
RSSA2_YEAST	40S ribosomal protein S0-B (Nucleic acid-binding protein NAB1B)	94	3.2	4300	1342.44	Cargo B	Cytoplasm		27.962		B1_1	1753
NEW1_YEAST	[NU+] prion formation protein 1	37	9.4	3400	361.386	Cargo B	Both		134.331		B1_1	2750
NAP1_YEAST	Nucleosome assembly protein	42	7.9	2000	251.954	Cargo B	Both		47.885		B1_1	616
SOL2_YEAST	6-phosphogluconolactonase-like protein 2 (Suppressor of LOS1)	97	6.5	1500	229.077	Cargo B	Cytoplasm		34.501		B1_1	1128
ERF3_YEAST	Eukaryotic peptide chain release factor GTP-binding subunit (ERF-3) (ERF3) (ERF2) (G1 to S phase transition protein 1) (Omnipotent suppressor protein 2) (PSI no more protein 2) (Polypeptide release factor 3) (Translation release factor 3)	66	5	1300	270.103	Cargo B	Cytoplasm		76.551		B1_1	144
RL4B_YEAST	60S ribosomal protein L4-B (L2) (RP2) (YL2)	30	3.8	1200	304.763	Cargo B	Cytoplasm		39.062		B1_1	1889
PWP1_YEAST	Periodic tryptophan protein 1	17	19	1100	57.1628	Cargo B			63.803		B1_1	518
STM1_YEAST	Suppressor protein STM1 (3BP1) (GU4 nucleic-binding protein 2) (G4p2 protein) (POP2 multicopy suppressor protein 4) (Ribosomal subunits association factor) (AF) (TOM1 suppressor protein 1) (Triplex-binding protein 1)	33	3.4	750	219.23	Cargo B	Both		29.995		B1_1	1422
SIS1_YEAST	Protein SIS1	11	3.1	730	237.668	Cargo B	Both		37.59		B1_1	617
RL5_YEAST	60S ribosomal protein L5 (L1) (L1a) (Ribosomal 5S RNA-binding protein) (YL3)	82	3.5	640	185.195	Cargo B	Both		33.715		B1_1	691
RV167_YEAST	Reduced viability upon starvation protein 167	61	4.5	580	127.604	Cargo B	Cytoplasm		52.774		B1_1	1466
SPA2_YEAST	Protein SPA2	84	12	550	46.7455	Cargo B	Other		163.143		B1_1	571
GPN1_YEAST	GPN-loop GTPase 1 (EC 3.6.5.-) (Essential PCL1-interacting ATPase 1) (GPN-loop GTPase NPA3) (Nucleolar preribosomal-associated protein 3)	82	20	500	25.1268	Cargo B	Cytoplasm	BioGrid	43.195		B1_1	1827
BUL2_YEAST	Ubiquitin ligase-binding protein BUL2	47	19	490	26.3573	Cargo B	Cytoplasm		104.786		B1_1	2351
SRP68_YEAST	Signal recognition particle subunit SRP68 (Signal recognition particle 68 kDa protein homolog)	26	44	480	10.9081	Cargo B	Both		69.006		B1_1	1281
GRH1_YEAST	GRASP65 homolog protein 1	88	5.6	460	83.847	Cargo B	Cytoplasm		41.119		B1_1	2430
SDO1_YEAST	Ribosome maturation protein SDO1	95	5.7	450	79.3839	Cargo B	Both		28.283		B1_1	2673
SHE4_YEAST	SWI5-dependent HO expression protein 4	54	29	430	14.9732	Cargo B	Cytoplasm		89.553		B1_1	1920
MYO2_YEAST	Myosin-2 (Cell division control protein 66) (Class V unconventional myosin MYO2) (Type V myosin heavy chain MYO2) (Myosin V MYO2)	30	12	390	32.1164	Cargo B	Cytoplasm	BioGrid	180.68		B1_1	474
IMDH4_YEAST	Inosine-5'-monophosphate dehydrogenase 4 (IMP dehydrogenase 4) (IMPD 4) (IMPDH 4) (EC 1.1.1.205)	67	3.1	370	122.259	Cargo B	Cytoplasm		56.394		B1_1	1903
SEC9_YEAST	Protein transport protein SEC9	81	48	340	7.11747	Cargo B			73.624		B1_1	1572
KCC2_YEAST	Calcium/calmodulin-dependent protein kinase II (EC 2.7.11.17)	84	5.9	320	55.3697	Cargo B			50.447		B1_1	561
RRP3_YEAST	ATP-dependent rRNA helicase RRP3 (EC 3.6.4.-) (Ribosomal RNA-processing protein 3)	51	3.2	290	90.7055	Cargo B	Nucleus		55.969		B1_1	1296
NOP56_YEAST	Nucleolar protein 56 (Ribosome biosynthesis protein SIK1) (Suppressor of I kappa b protein 1)	44	17	250	15.1706	Cargo B	Nucleus		56.864		B1_1	2920
YFI6_YEAST	Uncharacterized protein YFR016C	42	4.2	250	60.4797	Cargo B			137.698		B1_1	1736
GVP36_YEAST	Protein GVP36 (36 kDa Golgi vesicle protein)	17	5	230	46.6784	Cargo B	Cytoplasm		36.67		B1_1	1624
STDH_YEAST	Catabolic L-serine/threonine dehydratase [Includes: L-serine dehydratase (EC 4.3.1.17) (L-serine deaminase); L-threonine dehydratase (EC 4.3.1.19) (L-threonine deaminase)]	37	7.9	220	28.6762	Cargo B	Cytoplasm		39.301		B1_1	648
DBP8_YEAST	ATP-dependent RNA helicase DBP8 (EC 3.6.4.13) (DEAD box protein 8)	42	5.5	200	36.4601	Cargo B	Nucleus		47.878		B1_1	1301
RPA49_YEAST	DNA-directed RNA polymerase I subunit RPA49 (A49) (DNA-directed RNA polymerase I 49 kDa polypeptide)	13	10	190	19.1679	Cargo B	Nucleus		46.651		B1_1	2215
RFC2_YEAST	Replication factor C subunit 2 (Replication factor C2) (Activator 1 41 kDa subunit)	46	20	180	8.89499	Cargo B	Nucleus		39.742		B1_1	1569
GPB1_YEAST	Guanine nucleotide-binding protein subunit beta 1 (Gbeta mimic kelch protein 1)	57	29	170	5.71924	Cargo B	Cytoplasm	BioGrid	100.94		B1_1	2732
FBRL_YEAST	rRNA 2'-O-methyltransferase fibrillarin (EC 2.1.1.-) (Histone-glutamine methyltransferase) (U3 small nucleolar RNA-associated protein NOP1) (Nucleolar protein 1) (U3 snoRNA-associated protein NOP1)	31	29	150	5.14794	Cargo B	Nucleus		34.465		B1_1	403
TIP41_YEAST	Type 2A phosphatase activator TIP41 (PP2A phosphatase activator TIP41) (TAP42-interacting protein 1)	17	11	150	13.9971	Cargo B	Both		41.02		B1_1	2829
MCM6_YEAST	DNA replication licensing factor MCM6 (EC 3.6.4.12) (Minichromosome maintenance protein 6)	97	6.6	150	22.6526	Cargo B	Nucleus		112.978		B1_1	1961
YPK2_YEAST	Serine/threonine-protein kinase YPK2/YKR2 (EC 2.7.11.1)	48	34	140	4.3232	Cargo B	Both		76.664		B1_1	462
RFC4_YEAST	Replication factor C subunit 4 (Replication factor C4) (Activator 1 37 kDa subunit)	58	13	130	10.0669	Cargo B	Nucleus		36.149		B1_1	1565
URE2_YEAST	Transcriptional regulator URE2 (Disulfide reductase) (EC 1.8.4.-) (Glutathione peroxidase) (EC 1.11.1.9)	88	10	130	12.9898	Cargo B	Cytoplasm		40.271		B1_1	572
DBP3_YEAST	ATP-dependent RNA helicase DBP3 (EC 3.6.4.13) (DEAD box protein 3) (Helicase CA3)	98	3.5	130	37.5603	Cargo B	Nucleus		58.827		B1_1	499
TBA3_YEAST	Tubulin alpha-3 chain	12	5.4	120	22.3272	Cargo B	Cytoplasm		49.694		B1_1	262
RFC5_YEAST	Replication factor C subunit 5 (Replication factor C5) (Activator 1 40 kDa subunit)	97	24	110	4.50367	Cargo B	Nucleus		39.942		B1_1	1218
NAA35_YEAST	N-alpha-acetyltransferase, 35 NatC auxiliary subunit (Glucose repressible protein MAK10) (L-A virus GAG protein N-acetyltransferase subunit MAK10) (Maintenance of killer protein 10) (N-terminal acetyltransferase C complex subunit MAK10) (NatC complex subunit MAK10)	60	43	100	2.37925	Cargo B	Cytoplasm		84.302		B1_1	2238
QOR_YEAST	Probable quinone oxidoreductase (EC 1.6.5.5) (NADPH:quinone reductase)	31	3.1	100	33.5154	Cargo B			37.019		B1_1	1208
PBP1_YEAST	PAB1-binding protein 1	86	33	86	2.61091	Cargo B	Both	BioGrid	78.781		B1_1	2040
PSK2_YEAST	Serine/threonine-protein kinase PSK2 (EC 2.7.11.1) (PAS kinase 2)	81	6.1	78	12.886	Cargo B	Cytoplasm		124.373		B1_1	2683
MAK21_YEAST	Ribosome biogenesis protein MAK21 (Maintenance of killer protein 21) (Nucleolar complex protein 1)	25	4.3	66	15.4749	Cargo B	Nucleus		116.677		B1_1	2817
RPA34_YEAST	DNA-directed RNA polymerase I subunit RPA34 (A34) (DNA-directed DNA-dependent RNA polymerase 34.5 kDa polypeptide) (A34.5)	35	3.3	58	17.4006	Cargo B	Nucleus		26.875		B1_1	1783
ESF2_YEAST	Pre-rRNA-processing protein ESF2 (18S rRNA factor 2)	82	9.2	54	5.91376	Cargo B	Nucleus		36.408		B1_1	2086
RS16B_YEAST	40S ribosomal protein S16-B (RP61R)	740	2.7	3100	1148.39	Cargo B	Cytoplasm		15.847		B1_2	298
RS18B_YEAST	40S ribosomal protein S18-B	1800	2.9	2400	849.549	Cargo B	Cytoplasm		17.038		B1_2	300
GBLP_YEAST	Guanine nucleotide-binding protein subunit beta-like protein (Receptor for activated C kinase) (Receptor of activated protein kinase C 1) (RACK1)	140	2.2	2300	1048.83	Cargo B	Cytoplasm		34.805		B1_2	1141
RS24B_YEAST	40S ribosomal protein S24-B (RP50)	1300	2.8	2200	817.403	Cargo B	Cytoplasm		15.329		B1_2	288
RS20_YEAST	40S ribosomal protein S20	110	2.8	2100	754.623	Cargo B	Cytoplasm		13.907		B1_2	1291
RS8B_YEAST	40S ribosomal protein S8-B (RP19) (S14) (YS9)	860	2.7	1900	680.646	Cargo B	Cytoplasm		22.49		B1_2	292
RS17B_YEAST	40S ribosomal protein S17-B (RP51B)	410	2.1	1900	925.235	Cargo B	Cytoplasm		15.803		B1_2	106
RL7B_YEAST	60S ribosomal protein L7-B (L6) (RP11) (YL8)	120	2.3	1400	599.725	Cargo B	Cytoplasm		27.696		B1_2	2831
RS22B_YEAST	40S ribosomal protein S22-B (RP50) (S24) (YP58) (YS22)	400	2.1	1200	549.312	Cargo B	Cytoplasm		14.626		B1_2	2965
RL2B_YEAST	60S ribosomal protein L2-B (L5) (RP8) (YL6)	160	2.6	980	381.618	Cargo B	Cytoplasm		27.408		B1_2	295
RL12B_YEAST	60S ribosomal protein L12-B (L15) (YL23)	5600	2.6	780	306.565	Cargo B	Cytoplasm		17.823		B1_2	299
RS26B_YEAST	40S ribosomal protein S26-B	5400	2	740	371.241	Cargo B	Cytoplasm		13.447		B1_2	1475
DENR_YEAST	Translation machinery-associated protein 22 (Density-regulated protein homolog)	180	2	580	292.481	Cargo B	Cytoplasm		22.495		B1_2	1810
RL15A_YEAST	60S ribosomal protein L15-A (L13) (RP15R) (YL10) (YP18)	3200	2.3	440	197.414	Cargo B	Cytoplasm		24.422		B1_2	152
RL3_YEAST	60S ribosomal protein L3 (Maintenance of killer protein 8) (RP1) (Trichodermin resistance protein) (YL1)	210	2.3	440	193.372	Cargo B	Cytoplasm		43.758		B1_2	370
RPB2_YEAST	DNA-directed RNA polymerase II subunit RPB2 (RNA polymerase II subunit 2) (EC 2.7.7.6) (B150) (DNA-directed RNA polymerase II 140 kDa polypeptide)	100	2.3	430	187.364	Cargo B	Nucleus		138.751		B1_2	244
GRP78_YEAST	78 kDa glucose-regulated protein homolog (GRP-78) (Immunoglobulin heavy chain-binding protein homolog) (BiP)	180	2.3	400	175.06	Cargo B	Cytoplasm		74.468	ER	B1_2	422
XRN1_YEAST	5'-3' exoribonuclease 1 (EC 3.1.13.-) (DNA strand transfer protein beta) (STP-beta) (KAR(-)-enhancing mutation protein) (Strand exchange protein 1) (p175)	160	2.5	350	142.452	Cargo B	Cytoplasm		175.46		B1_2	544
RV161_YEAST	Reduced viability upon starvation protein 161	2400	2.5	340	136.047	Cargo B	Cytoplasm		30.25		B1_2	630
RL32_YEAST	60S ribosomal protein L32	2100	2	290	146.806	Cargo B	Cytoplasm		14.771		B1_2	1145
RL6A_YEAST	60S ribosomal protein L6-A (L17) (RP18) (YL16)	2000	2.7	280	105.257	Cargo B	Cytoplasm		19.962		B1_2	2245
RPB9_YEAST	DNA-directed RNA polymerase II subunit RPB9 (RNA polymerase II subunit B9) (B12.6) (DNA-directed RNA polymerase II 14.2 kDa polypeptide) (DNA-directed RNA polymerase II subunit 9)	2000	2.5	280	111.96	Cargo B	Nucleus		14.288		B1_2	717
PRP43_YEAST	Pre-mRNA-splicing factor ATP-dependent RNA helicase PRP43 (EC 3.6.4.13) (Helicase JA1)	1400	2.3	190	84.5492	Cargo B	Nucleus		87.562		B1_2	1978
CAF20_YEAST	Cap-associated protein CAF20 (20 kDa cap-associated protein) (CCR4-associated factor 2) (p20)	1000	2.5	140	56.6111	Cargo B	Cytoplasm		18.223		B1_2	355
TAE2_YEAST	Translation-associated element 2	880	2.5	120	49.8697	Cargo B	Cytoplasm		119.069		B1_2	2948
SOL1_YEAST	6-phosphogluconolactonase-like protein 1	860	2.3	120	52.1192	Cargo B	Both		35.653		B1_2	1912
SA155_YEAST	SIT4-associating protein SAP155	810	2.4	110	46.1369	Cargo B	Cytoplasm		115.002		B1_2	1741
NOP2_YEAST	25S rRNA (cytosine(2870)-C(5))-methyltransferase (EC 2.1.1.-) (Nucleolar protein 2)	710	2	98	49.0005	Cargo B	Nucleus		69.812		B1_2	1656
RL17A_YEAST	60S ribosomal protein L17-A (L20A) (YL17)	670	2	93	45.8747	Cargo B	Cytoplasm		20.549		B1_2	149
FTHC_YEAST	5-formyltetrahydrofolate cyclo-ligase (EC 6.3.3.2) (5,10-methenyl-tetrahydrofolate synthetase) (MTHFS) (Methenyl-THF synthetase)	620	2	86	42.9706	Cargo B	Cytoplasm		24.059		B1_2	1540
AFG2_YEAST	ATPase family gene 2 protein	490	2.1	68	31.6849	Cargo B			84.748		B1_2	905
YJ81_YEAST	Uncharacterized protein YJR111C	450	2.1	62	30.3506	Cargo B			32.208		B1_2	1840
PUT3_YEAST	Proline utilization trans-activator	420	2.1	58	27.736	Cargo B	Nucleus		111.414		B1_2	658
RL8A_YEAST	60S ribosomal protein L8-A (L4) (L4-2) (L7a-1) (Maintenance of killer protein 7) (RP6) (YL5)	400	2.9	56	19.5253	Cargo B	Cytoplasm		28.125		B1_2	434
SEC1_YEAST	Protein transport protein SEC1	350	30	49	1.64994	Cargo B			83.48		B1_3	754
YL032_YEAST	KH domain-containing protein YLL032C	350	8.8	49	5.57716	Cargo B	Cytoplasm		94.597		B1_3	2658
AF9_YEAST	Protein AF-9 homolog	350	3.5	49	14.2335	Cargo B	Both		25.981		B1_3	2142
YL108_YEAST	BTB/POZ domain-containing protein YLR108C	350	820	48	0.0585197	Cargo B	Nucleus		55.601		B1_3	2844
YM11_YEAST	Uncharacterized protein YMR124W	130	270	48	0.179296	Cargo B		BioGrid	105.914		B1_3	1440
PEX21_YEAST	Peroxisomal membrane protein PEX21 (Peroxin-21)	350	96	48	0.500624	Cargo B	Cytoplasm		33.05		B1_3	1902
CUL8_YEAST	Cullin-8 (Cullin-C) (Regulator of Ty1 transposition protein 101)	350	31	48	1.54679	Cargo B	Both		99.326		B1_3	1797
SIF2_YEAST	SIR4-interacting protein SIF2	340	18	47	2.59117	Cargo B	Nucleus		59.161		B1_3	1224
SSK1_YEAST	Osmolarity two-component system protein SSK1	340	17	47	2.80754	Cargo B	Cytoplasm		78.529		B1_3	2627
SCD6_YEAST	Protein SCD6	340	6.4	47	7.32073	Cargo B			39.19		B1_3	1750
SNU23_YEAST	23 kDa U4/U6.U5 small nuclear ribonucleoprotein component	340	6.2	47	7.62433	Cargo B	Nucleus		22.679		B1_3	2885
RLP24_YEAST	Ribosome biogenesis protein RLP24 (Ribosomal protein L24-like)	330	790	46	0.0585197	Cargo B	Both		23.975		B1_3	2667
DMA1_YEAST	E3 ubiquitin-protein ligase DMA1 (EC 6.3.2.-) (Checkpoint forkhead associated with RING domains-containing protein 1) (Defective in mitotic arrest protein 1)	330	30	46	1.53719	Cargo B	Cytoplasm		46.098		B1_3	1357
PRP11_YEAST	Pre-mRNA-splicing factor PRP11	330	11	46	4.35113	Cargo B	Nucleus		29.921		B1_3	2628
RKM4_YEAST	Ribosomal lysine N-methyltransferase 4 (EC 2.1.1.-) (SET domain-containing protein 7)	330	9.4	46	4.90317	Cargo B	Nucleus		57.289		B1_3	2935
GPN3_YEAST	GPN-loop GTPase 3 (EC 3.6.5.-)	330	9	46	5.08653	Cargo B			30.653		B1_3	2583
SYWM_YEAST	Tryptophan--tRNA ligase, mitochondrial (EC 6.1.1.2) (Tryptophanyl-tRNA synthetase) (TrpRS)	310	750	44	0.0585197	Cargo B	Cytoplasm		43.015		B1_3	132
YMY0_YEAST	UPF0659 protein YMR090W	320	25	44	1.78859	Cargo B	Cytoplasm		24.882		B1_3	2415
SHE3_YEAST	SWI5-dependent HO expression protein 3	310	12	44	3.64281	Cargo B	Cytoplasm		47.417		B1_3	1228
ACF4_YEAST	Assembly-complementing factor 4	310	740	43	0.0585197	Cargo B			35.521		B1_3	1830
PEF1_YEAST	Peflin (Penta-EF hand domain-containing protein 1)	310	740	43	0.0585197	Cargo B	Both		38.342		B1_3	2017
FAL1_YEAST	ATP-dependent RNA helicase FAL1 (EC 3.6.4.13) (Translation initiation factor four A-like protein 1)	310	730	43	0.0585197	Cargo B	Nucleus		45.213		B1_3	2789
YPK3_YEAST	AGC kinase YPK3 (EC 2.7.11.1)	310	15	43	2.94494	Cargo B	Cytoplasm		59.591		B1_3	1150
AP18B_YEAST	Clathrin coat assembly protein AP180B	300	720	42	0.0585197	Cargo B	Cytoplasm		64.328		B1_3	2043
GID8_YEAST	Glucose-induced degradation protein 8 (Dosage-dependent cell cycle regulator 1)	300	70	42	0.603447	Cargo B	Both		51.729		B1_3	1554
BUR2_YEAST	Protein BUR2 (Bypass UAS requirement protein 2) (Chromosome stability protein 4)	300	52	42	0.807961	Cargo B	Nucleus		45.721		B1_3	2516
SGD1_YEAST	Suppressor of glycerol defect protein 1	310	30	42	1.41789	Cargo B	Nucleus		102.853		B1_3	2527
BMT6_YEAST	25S rRNA (uridine(2843)-N(3))-methyltransferase (EC 2.1.1.-) (Base methyltransferase of 25S RNA 6)	310	13	42	3.23169	Cargo B	Both		42.041		B1_3	2859
YIF5_YEAST	Uncharacterized protein YIL055C	290	700	41	0.0585197	Cargo B			70.733		B1_3	1621
SAK1_YEAST	SNF1-activating kinase 1 (EC 2.7.11.1)	300	25	41	1.6753	Cargo B	Cytoplasm		126.872		B1_3	1412
YP071_YEAST	Uncharacterized protein YPL071C	290	14	41	2.96968	Cargo B	Both		18.435		B1_3	2271
KC12_YEAST	Casein kinase I homolog 2 (EC 2.7.11.1)	290	8.6	41	4.72519	Cargo B	Cytoplasm		62.079		B1_3	579
AP2B_YEAST	AP-2 complex subunit beta (Beta-2-adaptin) (Beta-adaptin) (Clathrin assembly protein complex 2 beta large chain) (Clathrin assembly protein large beta chain)	290	22	40	1.83525	Cargo B	Cytoplasm		80.453		B1_3	703
TAF5_YEAST	Transcription initiation factor TFIID subunit 5 (TAFII-90) (TBP-associated factor 5) (TBP-associated factor 90 kDa)	290	4.7	40	8.44478	Cargo B	Nucleus		88.968		B1_3	1171
SIP1_YEAST	SNF1 protein kinase subunit beta-1 (SNF1-interacting protein 1)	280	87	39	0.444	Cargo B	Cytoplasm		91.071		B1_3	863
CFT1_YEAST	Protein CFT1 (Cleavage factor two protein 1)	270	5.6	38	6.68412	Cargo B	Nucleus		153.405		B1_3	2596
KOG1_YEAST	Target of rapamycin complex 1 subunit KOG1 (TORC1 subunit KOG1) (Kontroller of growth protein 1) (Local anesthetic-sensitive protein 24)	280	27	37	1.35883	Cargo B	Cytoplasm		177.609		B1_3	1378
BEM2_YEAST	GTPase-activating protein BEM2/IPL2 (Bud emergence protein 2)	270	4.3	37	8.53451	Cargo B			245.43		B1_3	1481
FIP1_YEAST	Pre-mRNA polyadenylation factor FIP1	260	43	36	0.839718	Cargo B	Nucleus		35.777		B1_3	1749
ATG11_YEAST	Autophagy-related protein 11 (Cytoplasm to vacuole targeting protein 9)	260	22	36	1.67	Cargo B	Cytoplasm		135.025		B1_3	2947
CYK3_YEAST	Cytokinesis protein 3	260	8.8	36	4.16886	Cargo B	Cytoplasm		100.621		B1_3	2642
SKI8_YEAST	Antiviral protein SKI8 (Superkiller protein 8)	260	5.7	36	6.35227	Cargo B	Both		44.232		B1_3	2266
SWC4_YEAST	SWR1-complex protein 4 (ESA1-associated factor 2)	250	600	35	0.0585197	Cargo B	Nucleus		55.213		B1_3	2005
CRT10_YEAST	Protein CRT10 (Constitutive RNR transcription regulator 10)	260	180	35	0.199763	Cargo B			109.715		B1_3	2687
LST7_YEAST	Protein LST7 (Lethal with SEC thirteen protein 7)	250	97	35	0.359498	Cargo B			28.136		B1_3	2016
TGL1_YEAST	Sterol esterase TGL1 (EC 3.1.1.13) (Triglyceride lipase-cholesterol esterase 1)	250	20	35	1.80319	Cargo B	Cytoplasm		62.979	TM	B1_3	987
DXO_YEAST	Decapping nuclease RAI1 (EC 3.6.1.-) (RAT1-interacting protein)	250	580	34	0.0585197	Cargo B	Nucleus		44.51		B1_3	1948
YO385_YEAST	Uncharacterized protein YOR385W	240	580	34	0.0585197	Cargo B	Cytoplasm		34.064		B1_3	2734
CBK1_YEAST	Serine/threonine-protein kinase CBK1 (EC 2.7.11.1) (Cell wall biosynthesis kinase)	240	64	34	0.531452	Cargo B			86.946		B1_3	2126
NOP4_YEAST	Nucleolar protein 4 (Nucleolar protein NOP77)	250	29	34	1.18397	Cargo B	Nucleus		77.825		B1_3	1138
BBP_YEAST	Branchpoint-bridging protein (Mud synthetic-lethal 5 protein) (Splicing factor 1) (Zinc finger protein BBP)	250	17	34	2.00949	Cargo B	Nucleus		53.034		B1_3	2823
ENT4_YEAST	Epsin-4	240	13	34	2.63456	Cargo B			28.271		B1_3	2661
SWD2_YEAST	COMPASS component SWD2 (Complex proteins associated with SET1 protein SWD2) (Set1C component SWD2)	250	6.6	34	5.15909	Cargo B	Nucleus		37.122		B1_3	1084
RCL1_YEAST	RNA 3'-terminal phosphate cyclase-like protein	240	570	33	0.0585197	Cargo B	Nucleus		40.171		B1_3	2678
PAD1_YEAST	Phenylacrylic acid decarboxylase 1, mitochondrial (PAD) (EC 4.1.1.-)	240	26	33	1.29984	Cargo B	Cytoplasm		26.733	MT	B1_3	974
NOP9_YEAST	Nucleolar protein 9 (Pumilio domain-containing protein NOP9)	240	4.6	33	7.24606	Cargo B	Nucleus		77.722		B1_3	1807
ATG31_YEAST	Autophagy-related protein 31 (CIK1 suppressor protein 1) (Protein CIS1)	230	43	32	0.74856	Cargo B	Cytoplasm		22.191		B1_3	2903
JJJ1_YEAST	J protein JJJ1	220	40	31	0.771297	Cargo B	Nucleus		68.783		B1_3	2109
IMP3_YEAST	U3 small nucleolar ribonucleoprotein protein IMP3 (U3 snoRNP protein IMP3) (Interacting with MPP10 protein 3)	230	9.1	31	3.4628	Cargo B	Nucleus		21.885		B1_3	927
ACK1_YEAST	Activator of C kinase protein 1	220	130	30	0.230567	Cargo B			69.371		B1_3	2645
YKH5_YEAST	Uncharacterized protein YKL075C	210	500	29	0.0585197	Cargo B			52.088		B1_3	1076
YNG2_YEAST	Chromatin modification-related protein YNG2 (ESA1-associated factor 4) (ING1 homolog 2)	200	470	28	0.0585197	Cargo B	Nucleus		32.086		B1_3	1344
ATG29_YEAST	Autophagy-related protein 29	200	35	28	0.800003	Cargo B	Other		24.708		B1_3	2787
RS9A_YEAST	40S ribosomal protein S9-A (RP21) (S13) (YP28) (YS11)	200	11	28	2.40133	Cargo B	Both		22.443		B1_3	52
DOT6_YEAST	Transcriptional regulatory protein DOT6 (Disrupter of telomere silencing protein 6) (PAC-binding factor 2)	200	10	28	2.68317	Cargo B	Nucleus		73.048		B1_3	1524
FUS3_YEAST	Mitogen-activated protein kinase FUS3 (MAP kinase FUS3) (EC 2.7.11.24)	200	9.8	28	2.91763	Cargo B	Both		40.772		B1_3	432
RFC1_YEAST	Replication factor C subunit 1 (Replication factor C1) (Activator 1 95 kDa subunit) (Cell division control protein 44)	200	8.2	28	3.39297	Cargo B	Nucleus		94.903		B1_3	1276
URB1_YEAST	Nucleolar pre-ribosomal-associated protein 1 (Unhealthy ribosome biogenesis protein 1)	200	5.9	28	4.76412	Cargo B	Nucleus		203.287		B1_3	1000
TMA64_YEAST	Translation machinery-associated protein 64	200	4.4	28	6.38075	Cargo B			63.992		B1_3	2447
ACE2_YEAST	Metallothionein expression activator	200	470	27	0.0585197	Cargo B	Nucleus	BioGrid	86.634		B1_3	513
SIP2_YEAST	SNF1 protein kinase subunit beta-2 (Protein SPM2) (SNF1-interacting protein 2)	200	460	27	0.0585197	Cargo B	Both		46.405		B1_3	988
ROM2_YEAST	RHO1 GDP-GTP exchange protein 2	200	59	27	0.469788	Cargo B			152.596		B1_3	1922
NOC3_YEAST	Nucleolar complex-associated protein 3	190	44	27	0.6034	Cargo B	Nucleus		75.582		B1_3	2664
ZDS1_YEAST	Protein ZDS1 (Protein NRC1) (RT2GS1)	200	5	27	5.47572	Cargo B	Cytoplasm		103.358		B1_3	1909
HAA1_YEAST	Transcriptional activator HAA1	190	79	26	0.330589	Cargo B	Nucleus		76.671		B1_3	2955
SIP5_YEAST	Protein SIP5 (SNF1-interacting protein 5)	190	27	26	0.949267	Cargo B	Cytoplasm		55.859		B1_3	1555
RTG3_YEAST	Retrograde regulation protein 3	180	430	25	0.0585197	Cargo B	Nucleus		54.14		B1_3	1187
TF2B_YEAST	Transcription initiation factor IIB (General transcription factor TFIIB) (Transcription factor E)	180	430	25	0.0585197	Cargo B	Nucleus		38.2		B1_3	738
THP3_YEAST	Protein THP3 (THO-related protein 3)	180	430	25	0.0585197	Cargo B	Nucleus		53.719		B1_3	2776
YBI6_YEAST	Uncharacterized protein YBL086C	180	190	25	0.129133	Cargo B			51.997		B1_3	1191
YB75_YEAST	Uncharacterized protein YBR225W	180	44	25	0.563732	Cargo B			101.236		B1_3	1239
DDR48_YEAST	Stress protein DDR48 (DNA damage-responsive protein 48) (DDRP 48) (Flocculent-specific protein) (YP 75)	180	3.6	25	6.9331	Cargo B			46.233		B1_3	460
EAF1_YEAST	Chromatin modification-related protein EAF1 (ESA1-associated factor 1) (Vacuolar import and degradation protein 21)	170	100	24	0.239689	Cargo B	Nucleus	BioGrid	112.502		B1_3	2555
ESA1_YEAST	Histone acetyltransferase ESA1 (EC 2.3.1.48)	170	29	24	0.813189	Cargo B			52.613		B1_3	2714
GBP2_YEAST	Single-strand telomeric DNA-binding protein GBP2 (G-strand-binding protein 2) (RAP1 localization factor 6)	170	5.8	24	4.10106	Cargo B	Nucleus		48.729		B1_3	661
IRS4_YEAST	Increased rDNA silencing protein 4	170	400	23	0.0585197	Cargo B			68.88		B1_3	1088
TAF11_YEAST	Transcription initiation factor TFIID subunit 11 (TAFII-40) (TAFII40) (TBP-associated factor 11) (TBP-associated factor 40 kDa) (P40)	170	400	23	0.0585197	Cargo B	Nucleus		40.624		B1_3	2407
REP1_YEAST	Partitioning protein REP1 (R1) (Protein Baker) (Trans-acting factor B)	160	390	23	0.0585197	Cargo B	Nucleus		43.231		B1_3	114
SNF12_YEAST	Transcription regulatory protein SNF12 (SWI/SNF complex component SWP73)	160	160	23	0.143615	Cargo B	Nucleus		63.871		B1_3	2072
NST1_YEAST	Stress response protein NST1 (Negatively-affecting salt tolerance protein 1)	170	27	23	0.865311	Cargo B	Cytoplasm		141.514		B1_3	2143
NNF1_YEAST	Kinetochore-associated protein NNF1	160	18	23	1.29196	Cargo B	Nucleus		23.64		B1_3	1841
SP381_YEAST	Pre-mRNA-splicing factor SPP381 (Suppressor of PRP38-1 mutation)	160	13	23	1.79991	Cargo B	Nucleus		33.772		B1_3	1232
MDS3_YEAST	Negative regulator of sporulation MDS3 (MCK1 dosage suppressor 3)	170	7.5	23	3.11902	Cargo B	Cytoplasm		166.971		B1_3	1963
UTP17_YEAST	NET1-associated nuclear protein 1 (U three protein 17) (t-17) (U3 protein 17 required for transcription) (U3 small nucleolar RNA-associated protein 17) (U3 snoRNA-associated protein 17)	170	5.8	23	3.98901	Cargo B	Nucleus		101.237		B1_3	2278
GZF3_YEAST	Protein GZF3	160	370	22	0.0585197	Cargo B	Nucleus		60.52		B1_3	1706
RTG1_YEAST	Retrograde regulation protein 1	160	370	22	0.0585197	Cargo B	Nucleus		19.016		B1_3	878
TEM1_YEAST	Protein TEM1	160	370	22	0.0585197	Cargo B			27.296		B1_3	1410
UPF3_YEAST	Nonsense-mediated mRNA decay protein 3 (Up-frameshift suppressor 3)	160	24	22	0.919071	Cargo B	Nucleus		44.924		B1_3	1866
GYP1_YEAST	GTPase-activating protein GYP1 (GAP for YPT1)	160	20	22	1.07278	Cargo B	Cytoplasm		73.289		B1_3	2703
DIG1_YEAST	Down-regulator of invasive growth 1 (Regulator of STE12 protein 1) (Regulator of sterile twelve 1)	160	18	22	1.20121	Cargo B	Nucleus		49.356		B1_3	2293
URB2_YEAST	Nucleolar pre-ribosomal-associated protein 2 (Unhealthy ribosome biogenesis protein 2)	160	9.1	22	2.41538	Cargo B	Nucleus		135.118		B1_3	1818
ARP7_YEAST	Actin-related protein 7 (Actin-like protein ARP7) (Chromatin structure-remodeling complex protein ARP7) (SWI/SNF complex component ARP7)	160	3.9	22	5.58964	Cargo B	Nucleus		53.81		B1_3	2898
CUE3_YEAST	CUE domain-containing protein 3 (Coupling of ubiquitin conjugation to ER degradation protein 3)	150	360	21	0.0585197	Cargo B	Cytoplasm		72.043		B1_3	1982
PACC_YEAST	pH-response transcription factor pacC/RIM101 (Regulator of IME2 protein 1) (pH-response regulator protein RIM101)	150	360	21	0.0585197	Cargo B	Both		68.232		B1_3	964
ERG1_YEAST	Squalene monooxygenase (EC 1.14.13.132) (Squalene epoxidase) (SE)	150	350	21	0.0585197	Cargo B	Cytoplasm		55.126	TM	B1_3	830
RGC1_YEAST	Regulator of the glycerol channel 1	150	170	21	0.123547	Cargo B	Cytoplasm		120.395		B1_3	2526
TCO89_YEAST	Target of rapamycin complex 1 subunit TCO89 (TORC1 subunit TCO89) (89 kDa TOR complex 1 protein)	150	82	21	0.262152	Cargo B	Cytoplasm		88.845		B1_3	2736
PRP4_YEAST	U4/U6 small nuclear ribonucleoprotein PRP4 (Pre-mRNA-processing protein 4)	150	45	21	0.463296	Cargo B	Nucleus		52.442		B1_3	489
SWI1_YEAST	SWI/SNF chromatin-remodeling complex subunit SWI1 (Regulatory protein GAM3) (SWI/SNF complex subunit SWI1) (Transcription regulatory protein ADR6) (Transcription regulatory protein SWI1)	150	22	21	0.950593	Cargo B	Both		147.938		B1_3	259
SWI6_YEAST	Regulatory protein SWI6 (Cell-cycle box factor subunit SWI6) (MBF subunit P90) (Trans-acting activator of HO endonuclease gene)	150	11	21	1.92982	Cargo B	Both		90.56		B1_3	267
RL4P_YEAST	54S ribosomal protein YmL6, mitochondrial	150	3.9	21	5.27192	Cargo B	Cytoplasm		31.97	MT	B1_3	1924
RU1A_YEAST	U1 small nuclear ribonucleoprotein A (U1 snRNP A) (U1-A) (U1A) (Mutant U1 die protein 1)	140	340	20	0.0585197	Cargo B	Nucleus		34.378		B1_3	877
YBI1_YEAST	Uncharacterized protein YBL081W	140	340	20	0.0585197	Cargo B			40.767		B1_3	1192
EPL1_YEAST	Enhancer of polycomb-like protein 1	140	39	20	0.520755	Cargo B	Nucleus		96.738		B1_3	1721
AKL1_YEAST	Serine/threonine-protein kinase AKL1 (EC 2.7.11.1)	140	34	20	0.585165	Cargo B			123.989		B1_3	1155
MMS1_YEAST	E3 ubiquitin-protein ligase linker protein MMS1 (Methyl methanesulfonate-sensitivity protein 1) (Regulator of Ty1 transposition protein 108) (Synthetically lethal with MCM10 protein 6)	140	26	20	0.750753	Cargo B	Nucleus	BioGrid	161.238		B1_3	2541
PSP1_YEAST	Protein PSP1 (Growth inhibitory protein 5) (Polymerase suppressor protein 1)	140	3.6	20	5.59011	Cargo B	Cytoplasm		95.348		B1_3	1916
MSB1_YEAST	Morphogenesis-related protein MSB1 (Multicopy suppressor of bud emergence 1)	140	330	19	0.0585197	Cargo B			129.971		B1_3	519
PML39_YEAST	Pre-mRNA leakage protein 39 (39 kDa pre-mRNA leakage protein)	140	330	19	0.0585197	Cargo B	Both		39.207		B1_3	2352
RRP8_YEAST	25S rRNA (adenine(645)-N(1))-methyltransferase (EC 2.1.1.287) (Ribosomal RNA-processing protein 8)	140	330	19	0.0585197	Cargo B	Nucleus		45.985		B1_3	1403
YIQ1_YEAST	Uncharacterized protein YIL161W	140	330	19	0.0585197	Cargo B			27.112		B1_3	1583
ZRG8_YEAST	Zinc-regulated protein 8	140	91	19	0.20588	Cargo B	Cytoplasm		119.35		B1_3	1508
RBA50_YEAST	RNA polymerase II-associated protein RBA50 (RNA polymerase II-associated protein of 50 kDa)	140	32	19	0.593545	Cargo B	Cytoplasm		50.192		B1_3	2431
LDB19_YEAST	Protein LDB19 (Low dye-binding protein 19)	140	7.6	19	2.49848	Cargo B	Cytoplasm		89.826		B1_3	2934
MPP10_YEAST	U3 small nucleolar RNA-associated protein MPP10 (U3 snoRNA-associated protein MPP10) (M phase phosphoprotein 10)	140	6.1	19	3.16412	Cargo B	Nucleus		66.953		B1_3	1809
SCD5_YEAST	Protein SCD5 (Protein FTB1)	130	6	19	3.12706	Cargo B	Cytoplasm		97.305		B1_3	1006
EFG1P_YEAST	rRNA-processing protein EFG1 (Exit from G1 protein 1)	130	4.9	19	3.81509	Cargo B	Nucleus		27.121		B1_3	2958
NAM8_YEAST	Protein NAM8	140	3.7	19	5.14614	Cargo B	Cytoplasm		56.972		B1_3	2204
CTU1_YEAST	Cytoplasmic tRNA 2-thiolation protein 1 (EC 2.7.7.-) (Cytoplasmic tRNA adenylyltransferase 1) (Needs CLA4 to survive protein 6) (Thiolation of uridine in cytoplasmic tRNA protein 1)	130	320	18	0.0585197	Cargo B	Cytoplasm		39.987		B1_3	1959
PHO4_YEAST	Phosphate system positive regulatory protein PHO4	130	310	18	0.0585197	Cargo B	Both		34.089		B1_3	215
MAG2_YEAST	RING-finger protein MAG2	130	300	18	0.0585197	Cargo B	Cytoplasm		76.317		B1_3	2569
PRP21_YEAST	Pre-mRNA-splicing factor PRP21	130	300	18	0.0585197	Cargo B	Nucleus		33.052		B1_3	850
UTP21_YEAST	U3 small nucleolar RNA-associated protein 21 (U3 snoRNA-associated protein 21) (U three protein 21)	130	19	18	0.963156	Cargo B	Nucleus		104.791		B1_3	2521
SET3_YEAST	SET domain-containing protein 3	130	10	18	1.76285	Cargo B			85.48		B1_3	1095
VID28_YEAST	Vacuolar import and degradation protein 28 (Glucose-induced degradation protein 5)	130	6.3	18	2.80785	Cargo B	Both		105.491		B1_3	1628
VPS54_YEAST	Vacuolar protein sorting-associated protein 54 (CPF1 genetically-interacting protein 1) (Temperature-sensitive clathrin synthetic mutation protein 3)	130	6	18	2.99597	Cargo B	Cytoplasm		101.52		B1_3	2781
SLX9_YEAST	Ribosome biogenesis protein SLX9	120	72	17	0.231675	Cargo B	Nucleus		24.069		B1_3	2021
INN1_YEAST	Ingression protein 1	130	51	17	0.345063	Cargo B	Cytoplasm		46.226		B1_3	2130
NET1_YEAST	Nucleolar protein NET1	120	11	17	1.46081	Cargo B	Nucleus		128.531		B1_3	1790
GCN2_YEAST	Serine/threonine-protein kinase GCN2 (EC 2.7.11.1)	120	10	17	1.66469	Cargo B	Other		190.193		B1_3	396
DBP6_YEAST	ATP-dependent RNA helicase DBP6 (EC 3.6.4.13) (DEAD box protein 6)	120	5.8	17	2.95009	Cargo B	Nucleus		70.362		B1_3	2081
YCQ6_YEAST	Uncharacterized protein YCR016W	120	4.7	17	3.62619	Cargo B			33.593		B1_3	672
CFT2_YEAST	Cleavage factor two protein 2 (105 kDa protein associated with polyadenylation factor I)	130	3.7	17	4.74423	Cargo B	Nucleus		96.254		B1_3	2791
NUG1_YEAST	Nuclear GTP-binding protein NUG1 (Nuclear GTPase 1)	130	3.5	17	5.02871	Cargo B	Nucleus		57.709		B1_3	1500
PBP2_YEAST	PAB1-binding protein 2	120	280	16	0.0585197	Cargo B	Nucleus		45.782		B1_3	1182
BSP1_YEAST	Protein BSP1 (Binding of synaptojanin polyphosphoinositide phosphatase domain protein 1)	110	270	16	0.0585197	Cargo B	Cytoplasm		64.666		B1_3	2588
RCM1_YEAST	25S rRNA (cytosine(2278)-C(5))-methyltransferase (EC 2.1.1.-) (rRNA m(5)C methyltransferase 1)	110	43	16	0.369142	Cargo B	Nucleus		56.177		B1_3	2156
YHT1_YEAST	PH domain-containing protein YHR131C	110	21	16	0.742786	Cargo B	Cytoplasm		96.099		B1_3	1363
PEX7_YEAST	Peroxisomal targeting signal 2 receptor (PTS2 receptor) (Peroxin-7) (Peroxisome import protein PAS7)	110	20	16	0.764602	Cargo B	Cytoplasm		42.323		B1_3	1432
PTI1_YEAST	Protein PTI1	120	7.3	16	2.20471	Cargo B	Nucleus		46.983		B1_3	1470
DBP9_YEAST	ATP-dependent RNA helicase DBP9 (EC 3.6.4.13) (DEAD box protein 9)	110	7.2	16	2.15532	Cargo B	Nucleus		68.06		B1_3	2544
SLH1_YEAST	Antiviral helicase SLH1 (EC 3.6.4.13) (SKI2-like helicase 1)	120	3.9	16	4.19836	Cargo B	Cytoplasm		224.85		B1_3	2050
GIS1_YEAST	Transcriptional activator/repressor GIS1	120	3.4	16	4.71622	Cargo B	Nucleus		99.481		B1_3	2369
CDC27_YEAST	Anaphase-promoting complex subunit CDC27 (Anaphase-promoting complex subunit 3) (Cell division control protein 27)	110	260	15	0.0585197	Cargo B	Both		85.396		B1_3	1144
RRP36_YEAST	rRNA biogenesis protein RRP36 (Ribosomal RNA-processing protein 36)	110	260	15	0.0585197	Cargo B	Nucleus		36.125		B1_3	2925
ATG19_YEAST	Autophagy-related protein 19 (Cytoplasm-to-vacuole targeting protein 19)	110	250	15	0.0585197	Cargo B	Cytoplasm		47.599		B1_3	1021
REXO4_YEAST	RNA exonuclease 4 (EC 3.1.-.-)	110	250	15	0.0585197	Cargo B	Nucleus		32.895		B1_3	2691
MPT5_YEAST	Suppressor protein MPT5 (Protein HTR1) (Pumilio homology domain family member 5)	110	33	15	0.465949	Cargo B	Cytoplasm		95.422		B1_3	1423
CDC15_YEAST	Cell division control protein 15 (EC 2.7.11.1)	110	22	15	0.717716	Cargo B	Cytoplasm		110.242		B1_3	710
AIM41_YEAST	Altered inheritance of mitochondria protein 41, mitochondrial	110	4	15	3.81408	Cargo B	Cytoplasm		21.229	MT	B1_3	2768
TUS1_YEAST	Rho1 guanine nucleotide exchange factor TUS1 (TOR unique function suppressor protein 1)	100	250	14	0.0585197	Cargo B			149.113		B1_3	2568
MOB2_YEAST	CBK1 kinase activator protein MOB2 (MPS1 binder 2) (Maintenance of ploidy protein MOB2)	100	240	14	0.0585197	Cargo B	Both		33.276		B1_3	1717
RRN6_YEAST	RNA polymerase I-specific transcription initiation factor RRN6	100	240	14	0.0585197	Cargo B	Both		102.049		B1_3	901
MED2_YEAST	Mediator of RNA polymerase II transcription subunit 2 (Mediator complex subunit 2)	100	6.7	14	2.15555	Cargo B	Nucleus		47.718		B1_3	2800
SAS10_YEAST	Something about silencing protein 10 (U three protein 3) (U3 small nucleolar RNA-associated protein 3) (U3 snoRNA-associated protein 11)	100	6.3	14	2.24653	Cargo B	Nucleus		70.259		B1_3	2804
KIN3_YEAST	Serine/threonine-protein kinase KIN3 (EC 2.7.11.1)	100	6.2	14	2.29374	Cargo B			51.203		B1_3	549
CDC25_YEAST	Cell division control protein 25	100	4.7	14	3.052	Cargo B	Cytoplasm		179.092	TM	B1_3	136
CAF40_YEAST	Protein CAF40 (40 kDa CCR4-associated factor)	100	4.3	14	3.23302	Cargo B	Both		41.155		B1_3	2091
SF3B1_YEAST	U2 snRNP component HSH155	100	3.7	14	3.90638	Cargo B	Nucleus		110.028		B1_3	1896
GTS1_YEAST	Protein GTS1 (Protein LSR1)	72	720	42	0.0585197	Cargo B	Nucleus		44.407		B2	1649
DBP1_YEAST	ATP-dependent RNA helicase DBP1 (EC 3.6.4.13) (DEAD box protein 1) (Helicase CA1)	48	54	37	0.689923	Cargo B	Cytoplasm		67.917		B2	607
MLF3_YEAST	Protein MLF3 (Multicopy suppressor of leflunomide sensitivity 3)	14	620	36	0.0585197	Cargo B	Cytoplasm		49.21		B2	774
BUB2_YEAST	Mitotic check point protein BUB2 (Cell cycle arrest protein BUB2)	38	240	14	0.0585197	Cargo B	Cytoplasm		35.028		B2	692
GCN5_YEAST	Histone acetyltransferase GCN5 (EC 2.3.1.48)	98	230	14	0.0585197	Cargo B	Nucleus		51.069		B2	2319
GID4_YEAST	Vacuolar import and degradation protein 24 (Glucose-induced degradation protein 4)	98	230	14	0.0585197	Cargo B	Cytoplasm		41.245		B2	1225
SSL1_YEAST	Suppressor of stem-loop protein 1 (General transcription and DNA repair factor IIH subunit SSL1) (TFIIH subunit SSL1)	96	230	13	0.0585197	Cargo B	Nucleus		52.29		B2	2452
FOB1_YEAST	DNA replication fork-blocking protein FOB1	93	220	13	0.0585197	Cargo B			65.318		B2	51
HSV2_YEAST	SVP1-like protein 2	91	220	13	0.0585197	Cargo B	Cytoplasm		51.235		B2	1900
MPA43_YEAST	Protein MPA43	0.9	220	13	0.0585197	Cargo B			61.667		B2	2063
PTE1_YEAST	Peroxisomal acyl-coenzyme A thioester hydrolase 1 (EC 3.1.2.2) (Peroxisomal long-chain acyl-CoA thioesterase 1)	93	220	13	0.0585197	Cargo B	Cytoplasm		40.26		B2	1683
RNQ1_YEAST	[PIN+] prion protein RNQ1 (Rich in asparagine and glutamine protein 1)	92	220	13	0.0585197	Cargo B	Both		42.58		B2	640
YP066_YEAST	Uncharacterized protein YPL066W	93	220	13	0.0585197	Cargo B			54.893		B2	2826
SAS5_YEAST	Something about silencing protein 5	96	60	13	0.221579	Cargo B	Nucleus		29.018		B2	2990
HRT3_YEAST	F-box protein HRT3 (High level expression reduces Ty3 transposition protein 3)	86	210	12	0.0585197	Cargo B			40.475		B2	2880
LIPA_YEAST	Lipoyl synthase, mitochondrial (EC 2.8.1.8) (Lipoate synthase) (LS) (Lip-syn) (Lipoic acid synthase)	87	210	12	0.0585197	Cargo B	Cytoplasm		46.247	MT	B2	922
MDJ1_YEAST	DnaJ homolog 1, mitochondrial	15	210	12	0.0585197	Cargo B	Cytoplasm		55.561	MT	B2	1019
MED1_YEAST	Mediator of RNA polymerase II transcription subunit 1 (Mediator complex subunit 1)	89	210	12	0.0585197	Cargo B	Nucleus		64.251		B2	2869
UTP15_YEAST	U3 small nucleolar RNA-associated protein 15 (U3 snoRNA-associated protein 15) (U three protein 15) (U3 protein 15 required for transcription) (t-UTP15)	83	200	12	0.0585197	Cargo B	Nucleus		57.686		B2	2416
YO093_YEAST	Uncharacterized protein YOR093C	83	110	12	0.102144	Cargo B	Cytoplasm		186.907	TM	B2	2852
FKH1_YEAST	Fork head protein homolog 1	82	200	11	0.0585197	Cargo B	Nucleus		53.49		B2	1593
BOB1_YEAST	Protein BOB1 (BEM1-binding protein) (Growth inhibitory protein 7)	78	190	11	0.0585197	Cargo B			109.295		B2	1143
PFS2_YEAST	Polyadenylation factor subunit 2	79	190	11	0.0585197	Cargo B	Nucleus		53.143		B2	1693
ALO_YEAST	D-arabinono-1,4-lactone oxidase (ALO) (EC 1.1.3.37) (L-galactono-gamma-lactone oxidase)	12	180	11	0.0585197	Cargo B	Cytoplasm		59.494		B2	2167
NOC4_YEAST	Nucleolar complex protein 4 (U three protein 19) (U3 small nucleolar RNA-associated protein 19) (U3 snoRNA-associated protein 19)	77	180	11	0.0585197	Cargo B	Nucleus		63.637		B2	2580
RRN7_YEAST	RNA polymerase I-specific transcription initiation factor RRN7	78	180	11	0.0585197	Cargo B	Nucleus		60.357		B2	1657
PRP42_YEAST	U1 small nuclear ribonucleoprotein component PRP42 (U1 snRNP protein PRP42) (65 kDa snRNP protein) (Pre-mRNA-processing factor 42)	81	140	11	0.078471	Cargo B	Nucleus		65.145		B2	2360
SSK22_YEAST	Serine/threonine-protein kinase SSK22 (EC 2.7.11.1) (MAP kinase kinase kinase SSK22) (Suppressor of sensor kinase 22)	74	390	10	0.0261536	Cargo B			152.718		B2	652
PRP3_YEAST	U4/U6 small nuclear ribonucleoprotein PRP3 (Pre-mRNA-splicing factor 3)	73	200	10	0.0517173	Cargo B	Nucleus		55.87		B2	2321
ROX1_YEAST	Repressor ROX1 (Heme-dependent repression factor) (Hypoxic function repressor)	71	170	9.9	0.0585197	Low Abundant Cargo	Nucleus		41.838		C	612
SPT3_YEAST	Protein SPT3 (Positive regulator of Ty transcription)	72	170	9.9	0.0585197	Low Abundant Cargo	Nucleus		38.8		C	195
MED3_YEAST	Mediator of RNA polymerase II transcription subunit 3 (Hyper-recombination suppressor protein 1) (Mediator complex subunit 3) (Poly-glutamine domain protein 1)	70	170	9.7	0.0585197	Low Abundant Cargo	Nucleus		43.079		C	1571
SAS4_YEAST	Something about silencing protein 4	70	170	9.7	0.0585197	Low Abundant Cargo	Nucleus		55.409		C	2382
YD132_YEAST	Uncharacterized protein YDR132C	69	170	9.6	0.0585197	Low Abundant Cargo	Both		57.194		C	2373
VHS1_YEAST	Serine/threonine-protein kinase VHS1 (EC 2.7.11.1) (Viable in a HAL3 SIT4 background protein 1)	68	160	9.4	0.0585197	Low Abundant Cargo	Cytoplasm		52.136		C	2365
CUS2_YEAST	Cold sensitive U2 snRNA suppressor 2	67	160	9.3	0.0585197	Low Abundant Cargo			32.284		C	2092
RU17_YEAST	U1 small nuclear ribonucleoprotein 70 kDa homolog (U1 70K) (U1 snRNP 70 kDa homolog) (U1-70K) (U1 small nuclear ribonucleoprotein SNP1) (U1 snRNP protein SNP1)	65	150	8.9	0.0585197	Low Abundant Cargo	Nucleus		34.447		C	2213
SCJ1_YEAST	DnaJ-related protein SCJ1 (J protein SCJ1)	13	150	8.7	0.0585197	Low Abundant Cargo	Cytoplasm		41.543	ER	C	623
ASK10_YEAST	Activator of SKN7 protein 10 (Regulator of the glycerol channel 2)	60	140	8.4	0.0585197	Low Abundant Cargo	Cytoplasm		126.864		C	1862
DIP5_YEAST	Dicarboxylic amino acid permease	58	140	8	0.0585197	Low Abundant Cargo	Cytoplasm		68.097	TM	C	2055
TIM44_YEAST	Mitochondrial import inner membrane translocase subunit TIM44 (Inner membrane import site protein 45) (ISP45) (Membrane import machinery protein MIM44) (Mitochondrial protein import protein 1)	58	140	8	0.0585197	Low Abundant Cargo	Cytoplasm		48.854	MT	C	2231
RBG1_YEAST	Ribosome-interacting GTPase 1 (GTP-binding protein RBG1) (Genetically interacts with ribosomal genes protein 1)	57	140	7.9	0.0585197	Low Abundant Cargo	Cytoplasm		40.701		C	1462
RM35_YEAST	54S ribosomal protein L35, mitochondrial (YmL35)	57	140	7.9	0.0585197	Low Abundant Cargo	Cytoplasm		42.825	MT	C	2603
RRP14_YEAST	Ribosomal RNA-processing protein 14 (Ribosome biogenesis protein RRP14)	57	130	7.8	0.0585197	Low Abundant Cargo	Nucleus		50.482		C	1075
RRP7_YEAST	Ribosomal RNA-processing protein 7	56	130	7.8	0.0585197	Low Abundant Cargo	Nucleus		34.47		C	641
DIG2_YEAST	Down-regulator of invasive growth 2 (Regulator of STE12 protein 2) (Regulator of sterile twelve 2)	55	130	7.6	0.0585197	Low Abundant Cargo	Nucleus		36.879		C	2323
CUS1_YEAST	Cold sensitive U2 snRNA suppressor 1	54	130	7.5	0.0585197	Low Abundant Cargo	Nucleus		50.253		C	2251
ISA1_YEAST	Iron-sulfur assembly protein 1	54	130	7.5	0.0585197	Low Abundant Cargo	Cytoplasm		27.675		C	2656
SPT2_YEAST	Protein SPT2 (Negative regulator of Ty transcription)	54	130	7.5	0.0585197	Low Abundant Cargo	Nucleus		38.551		C	194
YBS1_YEAST	Uncharacterized protein YBR071W	54	130	7.5	0.0585197	Low Abundant Cargo			23.548		C	1215
TFB2_YEAST	RNA polymerase II transcription factor B subunit 2 (General transcription and DNA repair factor IIH subunit TFB2) (TFIIH subunit TFB2) (RNA polymerase II transcription factor B 52 kDa subunit) (RNA polymerase II transcription factor B p52 subunit)	52	120	7.3	0.0585197	Low Abundant Cargo	Nucleus		58.535		C	2280
ISY1_YEAST	Pre-mRNA-splicing factor ISY1 (Interactor of SYF1) (PRP19-associated complex protein 30)	50	120	7	0.0585197	Low Abundant Cargo	Both		28.024		C	522
MSO1_YEAST	Protein MSO1	51	120	7	0.0585197	Low Abundant Cargo			23.351		C	2068
ADA2_YEAST	Transcriptional adapter 2	50	120	6.9	0.0585197	Low Abundant Cargo	Nucleus		50.569		C	2246
MUM2_YEAST	Protein MUM2 (Muddled meiosis protein 2)	49	120	6.8	0.0585197	Low Abundant Cargo	Both		41.433		C	1211
MPD1_YEAST	Protein disulfide-isomerase MPD1 (EC 5.3.4.1)	48	110	6.7	0.0585197	Low Abundant Cargo	Cytoplasm		36.408	ER	C	2897
PHO89_YEAST	Phosphate permease PHO89 (Na(+)/Pi cotransporter PHO89)	47	110	6.5	0.0585197	Low Abundant Cargo	Cytoplasm		62.654	TM	C	1257
VDAC1_YEAST	Mitochondrial outer membrane protein porin 1 (Voltage-dependent anion-selective channel protein 1) (VDAC-1)	46	110	6.4	0.0585197	Low Abundant Cargo	Cytoplasm		30.428		C	137
YM01_YEAST	Uncharacterized protein YMR111C	44	100	6.1	0.0585197	Low Abundant Cargo			52.37		C	2437
AAR2_YEAST	A1 cistron-splicing factor AAR2	43	100	5.9	0.0585197	Low Abundant Cargo	Both		41.688		C	801
CEM1_YEAST	3-oxoacyl-[acyl-carrier-protein] synthase homolog (EC 2.3.1.41) (Beta-ketoacyl-ACP synthase homolog)	43	100	5.9	0.0585197	Low Abundant Cargo	Cytoplasm		47.555		C	1441
YM22_YEAST	Uncharacterized protein YMR144W	42	100	5.9	0.0585197	Low Abundant Cargo			38.57		C	1557
NOP8_YEAST	60S ribosome subunit biogenesis protein NOP8 (Nucleolar protein 8)	42	99	5.8	0.0585197	Low Abundant Cargo	Nucleus		56.966		C	2696
YL455_YEAST	PWWP domain-containing protein YLR455W	41	97	5.7	0.0585197	Low Abundant Cargo	Nucleus		35.508		C	2539
MGA1_YEAST	Protein MGA1	38	91	5.3	0.0585197	Low Abundant Cargo	Nucleus		50.735		C	1945
PRP31_YEAST	Pre-mRNA-processing factor 31	36	86	5	0.0585197	Low Abundant Cargo	Nucleus		56.303		C	1892
PRP24_YEAST	U4/U6 snRNA-associated-splicing factor PRP24 (U4/U6 snRNP protein)	35	84	4.9	0.0585197	Low Abundant Cargo	Nucleus		50.849		C	1899
NBP35_YEAST	Cytosolic Fe-S cluster assembly factor NBP35 (Nucleotide-binding protein 35)	35	83	4.8	0.0585197	Low Abundant Cargo	Both		35.253		C	1935
PRP46_YEAST	Pre-mRNA-splicing factor PRP46 (Complexed with CEF1 protein 1) (PRP nineteen-associated complex protein 50) (PRP19-associated complex protein 50) (Pre-mRNA-processing protein 46)	35	83	4.8	0.0585197	Low Abundant Cargo	Both		50.7		C	2901
YP11A_YEAST	Transposon Ty1-PL Gag polyprotein (Gag-p49) (Transposon Ty1 protein A) (TY1A) (TYA) (p58) [Cleaved into: Capsid protein (CA) (Gag-p45) (p54); Gag-p4]	33	79	4.6	0.0585197	Low Abundant Cargo	Cytoplasm		48.953		C	302
LGE1_YEAST	Transcriptional regulatory protein LGE1 (Large cells protein 1)	33	78	4.6	0.0585197	Low Abundant Cargo	Nucleus		37.309		C	2267
MRH1_YEAST	Protein MRH1 (Membrane protein related to HSP30)	33	78	4.6	0.0585197	Low Abundant Cargo	Cytoplasm		36.191	TM	C	2796
STE7_YEAST	Serine/threonine-protein kinase STE7 (EC 2.7.12.2)	32	76	4.4	0.0585197	Low Abundant Cargo			57.709		C	188
SPT4_YEAST	Transcription elongation factor SPT4 (Chromatin elongation factor SPT4)	31	74	4.3	0.0585197	Low Abundant Cargo	Nucleus		11.158		C	936
POP2_YEAST	Poly(A) ribonuclease POP2 (EC 3.1.13.4) (CCR4-associated factor 1)	2.5	73	4.3	0.0585197	Low Abundant Cargo	Both		49.682		C	1418
SGF73_YEAST	SAGA-associated factor 73 (73 kDa SAGA-associated factor) (SAGA histone acetyltransferase complex 73 kDa subunit)	31	73	4.3	0.0585197	Low Abundant Cargo	Nucleus		72.878		C	1991
AMPL_YEAST	Vacuolar aminopeptidase 1 (EC 3.4.11.22) (Aminopeptidase yscI) (Leucine aminopeptidase IV) (LAPIV) (Lysosomal aminopeptidase III) (Polypeptidase) (Vacuolar aminopeptidase I)	30	70	4.1	0.0585197	Low Abundant Cargo	Cytoplasm		57.093		C	385
PRP45_YEAST	Pre-mRNA-processing protein 45	29	70	4.1	0.0585197	Low Abundant Cargo	Nucleus		42.483		C	719
COM1_YEAST	DNA endonuclease SAE2 (EC 3.1.-.-) (Completion of meiotic recombination protein 1) (Sporulation in the absence of SPO11 protein 2)	29	68	4	0.0585197	Low Abundant Cargo	Both		40.097		C	1768
ARP1_YEAST	Centractin (Actin-like protein) (Actin-related protein 1)	28	67	3.9	0.0585197	Low Abundant Cargo	Cytoplasm		42.995		C	1287
RM07_YEAST	54S ribosomal protein L7, mitochondrial (YmL5) (YmL7)	28	67	3.9	0.0585197	Low Abundant Cargo	Cytoplasm		33.099	MT	C	1120
YNF0_YEAST	Uncharacterized protein YNL050C	28	67	3.9	0.0585197	Low Abundant Cargo			31.437		C	2148
DBR1_YEAST	Lariat debranching enzyme (EC 3.1.-.-)	27	65	3.8	0.0585197	Low Abundant Cargo	Both		47.741		C	601
HFI1_YEAST	Transcriptional coactivator HFI1/ADA1	27	65	3.8	0.0585197	Low Abundant Cargo	Nucleus		54.466		C	2779
LCD1_YEAST	DNA damage checkpoint protein LCD1 (DNA damage checkpoint protein 2) (Lethal, checkpoint-defective, DNA damage-sensitive protein 1)	26	63	3.7	0.0585197	Low Abundant Cargo	Both	NESdb, BioGrid	86.425		C	2426
KIN4_YEAST	Serine/threonine-protein kinase KIN4 (EC 2.7.11.1)	26	62	3.6	0.0585197	Low Abundant Cargo			90.088		C	2233
RNH1_YEAST	Ribonuclease H (RNase H) (EC 3.1.26.4)	26	61	3.6	0.0585197	Low Abundant Cargo			39.431		C	2458
SBE2_YEAST	Protein SBE2 (Suppressor of BEM4 protein 2)	25	60	3.5	0.0585197	Low Abundant Cargo	Cytoplasm		98.971		C	1690
UTP6_YEAST	U3 small nucleolar RNA-associated protein 6 (U3 snoRNA-associated protein 6) (U three protein 6)	25	60	3.5	0.0585197	Low Abundant Cargo	Nucleus		52.418		C	2247
BUD22_YEAST	Bud site selection protein 22	25	59	3.5	0.0585197	Low Abundant Cargo	Nucleus		60.054		C	2422
ICS2_YEAST	Increased copper sensitivity protein 2	25	59	3.4	0.0585197	Low Abundant Cargo			28.772		C	1233
YM8F_YEAST	Uncharacterized protein YMR265C	24	57	3.3	0.0585197	Low Abundant Cargo			54.106		C	2332
MSA2_YEAST	Putative transcriptional activator MSA2 (MBF and SBF-associated protein 2)	22	53	3.1	0.0585197	Low Abundant Cargo			39.862		C	1109
UBX6_YEAST	UBX domain-containing protein 6	0.6	53	3.1	0.0585197	Low Abundant Cargo			45.016		C	1796
VPS8_YEAST	Vacuolar protein sorting-associated protein 8 (Vacuolar protein-targeting protein 8)	22	53	3.1	0.0585197	Low Abundant Cargo	Cytoplasm		144.962		C	1452
REXO3_YEAST	RNA exonuclease 3 (EC 3.1.-.-)	21	50	2.9	0.0585197	Low Abundant Cargo	Both		45.88		C	2785
CDC23_YEAST	Anaphase-promoting complex subunit CDC23 (Cell division control protein 23)	21	49	2.9	0.0585197	Low Abundant Cargo	Nucleus		73.114		C	424
ERG26_YEAST	Sterol-4-alpha-carboxylate 3-dehydrogenase, decarboxylating (EC 1.1.1.170)	21	49	2.9	0.0585197	Low Abundant Cargo	Cytoplasm		38.706		C	2003
HLR1_YEAST	Protein HLR1 (LRE1 homolog)	5.5	48	2.8	0.0585197	Low Abundant Cargo	Cytoplasm		47.578		C	2432
LAS1_YEAST	Protein LAS1	20	48	2.8	0.0585197	Low Abundant Cargo	Both		59.351		C	1103
RNH2A_YEAST	Ribonuclease H2 subunit A (RNase H2 subunit A) (EC 3.1.26.4) (RNase H(201)) (RNase H(35)) (Ribonuclease HI large subunit) (RNase HI large subunit) (Ribonuclease HI subunit A)	20	47	2.7	0.0585197	Low Abundant Cargo	Both		34.875		C	2145
CAC2_YEAST	Chromatin assembly factor 1 subunit p60 (CAF-1 60 kDa subunit)	19	44	2.6	0.0585197	Low Abundant Cargo	Nucleus		51.252		C	2401
RRN11_YEAST	RNA polymerase I-specific transcription initiation factor RRN11	18	43	2.5	0.0585197	Low Abundant Cargo	Nucleus		59.254		C	2455
SWT21_YEAST	Protein SWT21 (Synthetic With TGS1 protein 21)	18	43	2.5	0.0585197	Low Abundant Cargo	Nucleus		40.308		C	2114
MED4_YEAST	Mediator of RNA polymerase II transcription subunit 4 (Mediator complex subunit 4)	18	42	2.5	0.0585197	Low Abundant Cargo	Nucleus		32.205		C	2877
DCC1_YEAST	Sister chromatid cohesion protein DCC1 (Defective in sister chromatid cohesion protein 1)	17	41	2.4	0.0585197	Low Abundant Cargo			44.074		C	663
NSE1_YEAST	Non-structural maintenance of chromosomes element 1 (Non-SMC element 1)	17	41	2.4	0.0585197	Low Abundant Cargo	Nucleus		38.335		C	2666
RM17_YEAST	54S ribosomal protein L17, mitochondrial (YmL17/YmL30)	17	41	2.4	0.0585197	Low Abundant Cargo	Cytoplasm		32.213	MT	C	1123
SFL1_YEAST	Flocculation suppression protein (Protein SFL1)	17	41	2.4	0.0585197	Low Abundant Cargo	Nucleus		83.345		C	493
NGG1_YEAST	Chromatin-remodeling complexes subunit NGG1 (Transcriptional adapter 3)	16	39	2.3	0.0585197	Low Abundant Cargo	Nucleus		79.282		C	839
STP3_YEAST	Zinc finger protein STP3	17	39	2.3	0.0585197	Low Abundant Cargo	Nucleus		37.718		C	2512
IML1_YEAST	Vacuolar membrane-associated protein IML1 (Increased minichromosome loss protein 1) (SEH-associated protein 1)	16	38	2.2	0.0585197	Low Abundant Cargo	Cytoplasm		181.949		C	1851
ATG23_YEAST	Autophagy-related protein 23 (Cytoplasm to vacuole targeting protein 23)	14	34	2	0.0585197	Low Abundant Cargo	Cytoplasm		51.54		C	2599
MSP1_YEAST	Protein MSP1 (Tat-binding homolog 4)	14	34	2	0.0585197	Low Abundant Cargo	Cytoplasm		40.343	TM	C	732
RTS3_YEAST	Protein phosphatase type 2A regulatory subunit RTS3	14	34	2	0.0585197	Low Abundant Cargo	Both		29.263		C	2038
KTR1_YEAST	Alpha-1,2 mannosyltransferase KTR1 (EC 2.4.1.-)	14	33	2	0.0585197	Low Abundant Cargo	Cytoplasm		46.022	TM	C	715
POS5_YEAST	NADH kinase POS5, mitochondrial (EC 2.7.1.86)	14	33	1.9	0.0585197	Low Abundant Cargo	Cytoplasm		46.247	MT	C	2626
YG34_YEAST	Uncharacterized protein YGR122W	14	33	1.9	0.0585197	Low Abundant Cargo			45.305		C	2031
TAP42_YEAST	Type 2A phosphatase-associated protein 42	13	31	1.8	0.0585197	Low Abundant Cargo			42.568		C	2424
LST4_YEAST	Protein LST4 (Lethal with SEC30 protein 4)	12	30	1.7	0.0585197	Low Abundant Cargo			93.359		C	999
NSA2_YEAST	Ribosome biogenesis protein NSA2 (NOP7-associated protein 2)	12	30	1.7	0.0585197	Low Abundant Cargo	Nucleus		29.723		C	1529
AIR2_YEAST	Protein AIR2 (Arginine methyltransferase-interacting RING finger protein 2)	12	29	1.7	0.0585197	Low Abundant Cargo	Nucleus		39.344		C	2923
ATG5_YEAST	Autophagy protein 5	11	27	1.6	0.0585197	Low Abundant Cargo	Cytoplasm		33.56		C	2889
TTI2_YEAST	TEL2-interacting protein 2	11	27	1.6	0.0585197	Low Abundant Cargo	Both		48.649		C	1849
URK1_YEAST	Uridine kinase (EC 2.7.1.48) (Uridine monophosphokinase)	11	27	1.6	0.0585197	Low Abundant Cargo	Both		56.296		C	707
PRP39_YEAST	Pre-mRNA-processing factor 39	11	26	1.5	0.0585197	Low Abundant Cargo	Nucleus		74.748		C	1449
SAS2_YEAST	Histone acetyltransferase SAS2 (EC 2.3.1.48) (Something about silencing protein 2)	10	25	1.4	0.0585197	Low Abundant Cargo	Both		39.206		C	1654
LYP1_YEAST	Lysine-specific permease	7.7	18	1.1	0.0585197	Low Abundant Cargo	Cytoplasm		68.09	TM	C	836
SHE1_YEAST	Mitotic spindle-associated protein SHE1 (Sensitive to high expression protein 1)	7.8	18	1.1	0.0585197	Low Abundant Cargo	Cytoplasm	BioGrid	38.015		C	1199
SIZ2_YEAST	E3 SUMO-protein ligase SIZ2 (EC 6.3.2.-) (SAP and Miz-finger domain-containing protein 2)	7.6	18	1.1	0.0585197	Low Abundant Cargo	Nucleus	BioGrid	81.178		C	2832
YD514_YEAST	Uncharacterized protein YDR514C	7.4	18	1	0.0585197	Low Abundant Cargo	Both		55.49		C	2428
IF4E_YEAST	Eukaryotic translation initiation factor 4E (eIF-4E) (eIF4E) (eIF-4F 25 kDa subunit) (mRNA cap-binding protein)	58	2.1	3600	1743.5	Ambiguous			24.254		D	209
IMDH3_YEAST	Inosine-5'-monophosphate dehydrogenase 3 (IMP dehydrogenase 3) (IMPD 3) (IMPDH 3) (EC 1.1.1.205)	17	2.4	2600	1092.37	Ambiguous	Cytoplasm		56.585		D	1904
RL6B_YEAST	60S ribosomal protein L6-B (L17) (RP18) (YL16)	79	2.5	1700	668.045	Ambiguous	Cytoplasm		19.986		D	148
SEC13_YEAST	Protein transport protein SEC13	36	2.1	1700	811.317	Ambiguous	Both		33.043		D	2439
RL27B_YEAST	60S ribosomal protein L27-B	84	2	1600	775.659	Ambiguous	Cytoplasm		15.505		D	273
RL20B_YEAST	60S ribosomal protein L20-B (L18a)	88	2.5	870	352.819	Ambiguous	Cytoplasm		20.437		D	284
ERF1_YEAST	Eukaryotic peptide chain release factor subunit 1 (Eukaryotic release factor 1) (eRF1) (Omnipotent suppressor protein 1)	36	2.6	720	275.94	Ambiguous	Cytoplasm		49.006		D	340
BFR1_YEAST	Nuclear segregation protein BFR1 (Brefeldin A resistance protein 1)	23	2.1	580	272.179	Ambiguous			54.639		D	1402
TCPQ_YEAST	T-complex protein 1 subunit theta (TCP-1-theta) (CCT-theta)	16	2.1	570	271.047	Ambiguous	Cytoplasm		61.662		D	1808
COPE_YEAST	Coatomer subunit epsilon (Epsilon-coat protein) (Epsilon-COP)	28	2.8	550	197.227	Ambiguous	Cytoplasm		33.829		D	1615
RPAC1_YEAST	DNA-directed RNA polymerases I and III subunit RPAC1 (RNA polymerases I and III subunit AC1) (C37) (DNA-directed RNA polymerases I and III 40 kDa polypeptide) (AC40) (C40)	24	2.5	470	192.623	Ambiguous	Nucleus		37.687		D	231
SFB3_YEAST	SED5-binding protein 3 (Lethal with SEC13 protein 1) (SEC24-related protein 3)	30	2.3	390	170.776	Ambiguous	Cytoplasm		103.95		D	1347
COPD_YEAST	Coatomer subunit delta (Delta-coat protein) (Delta-COP)	28	2.9	310	106.896	Ambiguous	Cytoplasm		60.628		D	1745
KEL1_YEAST	Kelch repeat-containing protein 1	36	2.7	93	34.1568	Ambiguous			131.094		D	1369
EIS1_YEAST	Eisosome protein 1	11	2.6	53	20.4741	Ambiguous	Cytoplasm		93.345		D	2480
NPR1_YEAST	Nitrogen permease reactivator protein (EC 2.7.11.1) (Serine/threonine-protein kinase NPR1)	34	6	46	7.78218	Ambiguous	Cytoplasm		85.99		D	550
TOP2_YEAST	DNA topoisomerase 2 (EC 5.99.1.3) (DNA topoisomerase II)	330	2.3	46	19.647	Ambiguous	Nucleus		164.215		D	190
PIH1_YEAST	Protein interacting with Hsp90 1 (Nucleolar protein 17)	23	3.8	45	11.8374	Ambiguous	Both		39.519		D	1321
ARP4_YEAST	Actin-related protein 4 (Actin-like protein ARP4) (Actin-like protein 4)	320	2.3	45	19.7906	Ambiguous	Nucleus		54.832		D	2192
SBE22_YEAST	Protein SBE22	85	12	41	3.47778	Ambiguous	Cytoplasm		96.398		D	1349
HSP42_YEAST	Heat shock protein 42 (42 kDa heat shock protein)	13	2.8	40	14.2889	Ambiguous			42.817		D	2871
SET2_YEAST	Histone-lysine N-methyltransferase, H3 lysine-36 specific (EC 2.1.1.43) (Lysine N-methyltransferase 3) (SET domain-containing protein 2)	270	2.1	37	18.2324	Ambiguous	Nucleus		84.461		D	1779
ERG6_YEAST	Sterol 24-C-methyltransferase (EC 2.1.1.41) (Delta(24)-sterol C-methyltransferase)	13	8.4	36	4.32928	Ambiguous			43.431		D	615
LTN1_YEAST	E3 ubiquitin-protein ligase listerin (EC 6.3.2.-) (RING domain mutant killed by rtf1 deletion protein 1)	250	2.2	35	15.9267	Ambiguous	Nucleus		180.186		D	2462
SCY1_YEAST	Protein kinase-like protein SCY1	12	3.4	33	9.99672	Ambiguous			91.001		D	1937
NBA1_YEAST	Protein NBA1 (NAP1 and bud neck-associated protein 1)	230	2.5	31	12.744	Ambiguous	Cytoplasm		55.923		D	2688
MCES_YEAST	mRNA cap guanine-N7 methyltransferase (EC 2.1.1.56) (mRNA (guanine-N(7)-)-methyltransferase) (mRNA cap methyltransferase)	220	2.1	30	14.754	Ambiguous	Nucleus		50.341		D	900
IRA1_YEAST	Inhibitory regulator protein IRA1	21	47	26	0.557279	Ambiguous	Cytoplasm		350.98		D	463
NCB5R_YEAST	NADH-cytochrome b5 reductase 1 (EC 1.6.2.2) (Microsomal cytochrome b reductase) (P35)	86	36	26	0.720564	Ambiguous	Cytoplasm		31.494	TM	D	1272
SEC6_YEAST	Exocyst complex component SEC6	180	2.5	26	10.2636	Ambiguous	Cytoplasm		93.428		D	913
BUD14_YEAST	Bud site selection protein 14	180	2.7	25	9.14701	Ambiguous			78.981		D	711
RRP9_YEAST	Ribosomal RNA-processing protein 9	23	25	24	0.970022	Ambiguous	Nucleus		65.054		D	2578
SIR4_YEAST	Regulatory protein SIR4 (Silent information regulator 4)	21	7.9	24	2.98825	Ambiguous	Nucleus		152.062		D	339
MKT1_YEAST	Protein MKT1	170	2.5	24	9.49813	Ambiguous			94.495		D	1644
SMC4_YEAST	Structural maintenance of chromosomes protein 4	180	2.5	24	9.74469	Ambiguous	Both		162.189		D	2848
UTP13_YEAST	U3 small nucleolar RNA-associated protein 13 (U3 snoRNA-associated protein 13) (U three protein 13)	170	2.5	23	9.09161	Ambiguous	Nucleus		91.032		D	2514
BUD20_YEAST	Bud site selection protein 20	160	2.3	22	9.3335	Ambiguous	Both		18.517		D	2677
NMA1_YEAST	Nicotinamide-nucleotide adenylyltransferase 1 (EC 2.7.7.1) (NAD(+) diphosphorylase 1) (NAD(+) pyrophosphorylase 1) (NMN adenylyltransferase 1)	150	2.5	21	8.47755	Ambiguous			45.859		D	2537
MAF1_YEAST	Repressor of RNA polymerase III transcription MAF1	150	2.6	20	7.73443	Ambiguous	Both		44.733		D	1684
RSE1_YEAST	Pre-mRNA-splicing factor RSE1 (RNA splicing and ER to Golgi transport factor 1) (Spliceosome-associated protein 130)	60	3.9	19	4.92252	Ambiguous	Nucleus		153.784		D	2454
IRA2_YEAST	Inhibitory regulator protein IRA2	70	38	18	0.479401	Ambiguous	Cytoplasm		351.669		D	467
UTP12_YEAST	U3 small nucleolar RNA-associated protein 12 (U3 snoRNA-associated protein 12) (DOM34-interacting protein 2) (U three protein 12)	120	2.9	17	5.75943	Ambiguous	Nucleus		106.342		D	2833
LST8_YEAST	Target of rapamycin complex subunit LST8 (TORC subunit LST8) (Lethal with SEC13 protein 8)	14	2.5	17	6.91983	Ambiguous	Cytoplasm		34.034		D	1664
MUD2_YEAST	Splicing factor MUD2	21	25	16	0.624046	Ambiguous			60.46		D	1077
RAD51_YEAST	DNA repair protein RAD51	48	5.1	15	3.01564	Ambiguous	Nucleus		42.963		D	656
DBP10_YEAST	ATP-dependent RNA helicase DBP10 (EC 3.6.4.13) (DEAD box protein 10)	100	2.7	14	5.08661	Ambiguous	Nucleus		112.946		D	2893
HSH49_YEAST	Protein HSH49	100	2.7	14	5.42828	Ambiguous	Nucleus		24.503		D	2978
SNF5_YEAST	SWI/SNF chromatin-remodeling complex subunit SNF5 (SWI/SNF complex subunit SNF5) (Transcription factor TYE4) (Transcription regulatory protein SNF5)	97	41	13	0.32597	Ambiguous	Nucleus		102.543		D	453
SAF1_YEAST	SCF-associated factor 1	95	35	13	0.377054	Ambiguous			70.495		D	1255
CTL1_YEAST	Polynucleotide 5'-triphosphatase (EC 3.1.3.33) (mRNA 5'-triphosphatase) (TPase)	94	20	13	0.655475	Ambiguous	Both	BioGrid	36.974		D	2308
PEP3_YEAST	Vacuolar membrane protein PEP3 (Carboxypeptidase Y-deficient protein 3) (Vacuolar morphogenesis protein 8) (Vacuolar protein sorting-associated protein 18) (Vacuolar protein-targeting protein 18)	91	17	13	0.760436	Ambiguous	Cytoplasm		107.398		D	714
SEA4_YEAST	SEH-associated protein 4	94	8.2	13	1.58846	Ambiguous	Cytoplasm		117.636		D	1186
BUD2_YEAST	Inhibitory regulator protein BUD2/CLA2 (Bud site selection protein 2)	91	6.8	13	1.86701	Ambiguous			126.663		D	951
TAF4_YEAST	Transcription initiation factor TFIID subunit 4 (MPT-1) (TAF suppressor gene 2 protein) (TAFII-48) (TBP-associated factor 4) (TBP-associated factor 48 kDa)	96	6.6	13	2.02221	Ambiguous	Nucleus		42.336		D	1906
YRA2_YEAST	RNA annealing protein YRA2	92	4	13	3.23333	Ambiguous	Nucleus		23.778		D	1057
PEP5_YEAST	E3 ubiquitin-protein ligase PEP5 (EC 6.3.2.-) (Carboxypeptidase Y-deficient protein 5) (Histone E3 ligase PEP5) (Vacuolar biogenesis protein END1) (Vacuolar morphogenesis protein 1) (Vacuolar protein sorting-associated protein 11) (Vacuolar protein-targeting protein 11)	97	3.6	13	3.73441	Ambiguous	Cytoplasm		117.478		D	350
MED5_YEAST	Mediator of RNA polymerase II transcription subunit 5 (Mediator complex subunit 5) (Negative regulator of URS2 protein 1)	96	2.7	13	4.87125	Ambiguous	Nucleus		128.794		D	1972
6P21_YEAST	6-phosphofructo-2-kinase 1 (6PF-2-K 1) (EC 2.7.1.105) (Phosphofructokinase 2 I)	96	2.5	13	5.26973	Ambiguous			93.417		D	1582
FPK1_YEAST	Flippase kinase 1 (EC 2.7.11.1)	83	47	12	0.247296	Ambiguous	Cytoplasm		100.546		D	2083
FYV10_YEAST	Protein FYV10 (Function required for yeast viability protein 10) (Glucose-induced degradation protein 9)	88	16	12	0.760756	Ambiguous	Both		59.894		D	1609
PRP9_YEAST	Pre-mRNA-splicing factor PRP9	86	16	12	0.748498	Ambiguous	Nucleus		63.029		D	479
YD444_YEAST	Putative lipase YDR444W (EC 3.1.-.-)	89	12	12	1.05406	Ambiguous	Cytoplasm		78.108		D	2392
MED15_YEAST	Mediator of RNA polymerase II transcription subunit 15 (Autonomous replication regulatory protein 3) (Basal expression activator protein 1) (Defective silencing suppressor protein 4) (Mediator complex subunit 15) (Transcription regulatory protein GAL11) (Ty insertion suppressor protein 13)	86	10	12	1.19279	Ambiguous	Nucleus		120.309		D	477
VPS16_YEAST	Vacuolar protein sorting-associated protein 16 (Vacuolar morphogenesis protein 9) (Vacuolar protein-targeting protein 16)	83	8.9	12	1.28954	Ambiguous	Cytoplasm		92.741		D	2317
ATPF_YEAST	ATP synthase subunit 4, mitochondrial	37	7.7	12	1.54679	Ambiguous	Cytoplasm		26.925	MT	D	145
SWI4_YEAST	Regulatory protein SWI4 (Cell-cycle box factor subunit SWI4) (Protein ART1)	89	6.7	12	1.85648	Ambiguous			123.806		D	622
LAS17_YEAST	Proline-rich protein LAS17	88	4	12	3.05168	Ambiguous			67.572		D	2911
ECM21_YEAST	Protein ECM21 (Extracellular mutant protein 21)	85	3.8	12	3.14188	Ambiguous	Cytoplasm		123.61		D	1188
CTU2_YEAST	Cytoplasmic tRNA 2-thiolation protein 2 (Needs CLA4 to survive protein 2) (Thiolation of uridine in cytoplasmic tRNA protein 2)	82	18	11	0.618623	Ambiguous	Cytoplasm		56.473		D	2138
EAF5_YEAST	Chromatin modification-related protein EAF5 (ESA1-associated factor 5)	77	16	11	0.691453	Ambiguous	Nucleus		31.644		D	1494
ACS1_YEAST	Acetyl-coenzyme A synthetase 1 (EC 6.2.1.1) (Acetate--CoA ligase 1) (Acyl-activating enzyme 1)	79	9.7	11	1.13676	Ambiguous	Both		79.141		D	2227
RTS2_YEAST	Zinc finger protein RTS2	79	5.3	11	2.08494	Ambiguous	Nucleus		27.054		D	1653
BUR1_YEAST	Serine/threonine-protein kinase BUR1 (EC 2.7.11.22) (EC 2.7.11.23) (Bypass UAS requirement protein 1) (Suppressor of GPA1-Vall50 mutation protein 1)	79	3.1	11	3.49979	Ambiguous	Nucleus		74.239		D	580
YAP3_YEAST	AP-1-like transcription factor YAP3	80	2	11	5.54977	Ambiguous	Both		37.955		D	1312
YL22A_YEAST	Transposon Ty2-LR2 Gag polyprotein (TY2A) (TYA) (Transposon Ty2 protein A) [Cleaved into: Capsid protein (CA); Gag-p4]	72	16	10	0.630452	Ambiguous	Cytoplasm		49.847		D	278
SQS1_YEAST	Protein SQS1 (Squelch of splicing suppression protein 1)	74	6.9	10	1.4942	Ambiguous	Both		86.95		D	2111
NPR3_YEAST	Nitrogen permease regulator 3 (Required for meiotic nuclear division protein 11)	75	6.6	10	1.58986	Ambiguous	Cytoplasm		129.973	ER	D	1307
NOT2_YEAST	General negative regulator of transcription subunit 2 (cell division cycle protein 36)	75	4.6	10	2.28508	Ambiguous	Both		22.363		D	159
TRS23_YEAST	Trafficking protein particle complex subunit 23 (TRAPP subunit 23) (Transport protein particle 23 kDa subunit)	74	2.8	10	3.69743	Ambiguous	Cytoplasm		24.863		D	2364
JIP5_YEAST	WD repeat-containing protein JIP5 (Jumonji domain-interacting protein 5)	72	2.2	10	4.64131	Ambiguous	Nucleus		55.264		D	2542
MPE1_YEAST	Protein MPE1	73	2.2	10	4.56648	Ambiguous	Nucleus		49.647		D	1032
HSL1_YEAST	Probable serine/threonine-protein kinase HSL1 (EC 2.7.11.1)	68	4.8	9.5	1.97734	Ambiguous	Cytoplasm		169.607		D	1002
VPS3_YEAST	Vacuolar protein sorting-associated protein 3 (Vacuolar protein-targeting protein 17)	68	6.1	9.4	1.53649	Ambiguous	Cytoplasm		116.922		D	592
NNK1_YEAST	Nitrogen network kinase 1 (EC 2.7.11.1)	67	110	9.2	0.0864296	Ambiguous	Cytoplasm		103.956		D	1043
ROK1_YEAST	ATP-dependent RNA helicase ROK1 (EC 3.6.4.13) (Rescuer of KEM1 protein 1)	65	2.3	9	3.83639	Ambiguous	Nucleus		63.653		D	1748
DPH1_YEAST	Diphthamide biosynthesis protein 1	64	22	8.9	0.408428	Ambiguous	Cytoplasm		48.311		D	1607
RMD5_YEAST	Sporulation protein RMD5 (Glucose-induced degradation protein 2) (Required for meiotic nuclear division protein 5)	64	21	8.9	0.419032	Ambiguous	Cytoplasm		49.169		D	2936
SSK2_YEAST	MAP kinase kinase kinase SSK2 (EC 2.7.11.25) (Suppressor of sensor kinase 2)	62	2.5	8.6	3.42988	Ambiguous			180.528		D	2066
MED17_YEAST	Mediator of RNA polymerase II transcription subunit 17 (Mediator complex subunit 17) (Suppressor of RNA polymerase B 4)	62	2.1	8.6	4.10426	Ambiguous	Nucleus		78.476		D	860
ORC5_YEAST	Origin recognition complex subunit 5 (Origin recognition complex 53 kDa subunit)	61	12	8.5	0.703102	Ambiguous	Nucleus		55.289		D	1915
MED14_YEAST	Mediator of RNA polymerase II transcription subunit 14 (Glucose repression regulatory protein 1) (Mediator complex subunit 14)	61	4.5	8.5	1.87271	Ambiguous	Nucleus		123.358		D	470
YP13B_YEAST	Transposon Ty1-PR2 Gag-Pol polyprotein (Gag-Pol-p199) (TY1A-TY1B) (Transposon Ty1 TYA-TYB polyprotein) (p190) [Cleaved into: Capsid protein (CA) (Gag-p45) (p54); Ty1 protease (PR) (EC 3.4.23.-) (Pol-p20) (p23); Integrase (IN) (Pol-p71) (p84) (p90); Reverse transcriptase/ribonuclease H (RT) (RT-RH) (EC 2.7.7.49) (EC 2.7.7.7) (EC 3.1.26.4) (Pol-p63) (p60)]	110	2.3	8.4	3.57852	Ambiguous	Both		198.639		D	277
RXT2_YEAST	Transcriptional regulatory protein RXT2	60	3.4	8.3	2.43255	Ambiguous	Nucleus		48.629		D	1220
TFB3_YEAST	RNA polymerase II transcription factor B subunit 3 (RNA polymerase II transcription factor B 38 kDa subunit) (RNA polymerase II transcription factor B p38 subunit)	58	15	8	0.53604	Ambiguous	Nucleus		38.128		D	2314
CDC4_YEAST	Cell division control protein 4 (E3 ubiquitin ligase complex SCF subunit CDC4) (F-box protein CDC4)	55	5.6	7.6	1.38106	Ambiguous	Nucleus		86.09		D	234
SNF2_YEAST	Transcription regulatory protein SNF2 (EC 3.6.4.-) (ATP-dependent helicase SNF2) (Regulatory protein GAM1) (Regulatory protein SWI2) (SWI/SNF complex component SNF2) (Transcription factor TYE3)	55	4.4	7.6	1.74568	Ambiguous	Nucleus		194.051		D	534
RPH1_YEAST	DNA damage-responsive transcriptional repressor RPH1	54	27	7.5	0.279568	Ambiguous	Nucleus		90.211		D	1479
SKG1_YEAST	Suppressor of lethality of KEX2 GAS1 double null mutant protein 1	54	13	7.5	0.574897	Ambiguous	Cytoplasm		39.83	TM	D	1117
IST3_YEAST	U2 snRNP component IST3 (Increased sodium tolerance protein 3) (U2 snRNP protein SNU17)	53	6.3	7.4	1.17609	Ambiguous	Both		17.098		D	1637
HEL2_YEAST	E3 ubiquitin-protein ligase HEL2 (EC 6.3.2.-) (Histone E3 ligase 2)	53	4.3	7.3	1.69847	Ambiguous	Cytoplasm		72.756		D	2493
SPB1_YEAST	27S pre-rRNA (guanosine(2922)-2'-O)-methyltransferase (EC 2.1.1.167) (2'-O-ribose RNA methyltransferase SPB1) (AdoMet-dependent rRNA methyltransferase SPB1) (S-adenosyl-L-methionine-dependent methyltransferase) (Suppressor of PAB1 protein 1)	52	8.3	7.2	0.866637	Ambiguous	Nucleus		96.485		D	668
UBP10_YEAST	Ubiquitin carboxyl-terminal hydrolase 10 (EC 3.4.19.12) (Deubiquitinating enzyme 10) (Disrupter of telomere silencing protein 4) (Ubiquitin thioesterase 10) (Ubiquitin-specific-processing protease 10)	52	4.7	7.2	1.53649	Ambiguous	Other		88.531		D	2115
TRA1_YEAST	Transcription-associated protein 1 (p400 kDa component of SAGA)	51	3.5	7.1	2.05685	Ambiguous	Nucleus		433.18		D	1348
RT01_YEAST	37S ribosomal protein MRP1, mitochondrial	14	6.3	7	1.12092	Ambiguous	Cytoplasm		36.729	MT	D	314
PAP2_YEAST	Poly(A) RNA polymerase protein 2 (EC 2.7.7.-) (DNA polymerase kappa) (DNA polymerase sigma) (Topoisomerase 1-related protein TRF4)	50	3.8	7	1.85827	Ambiguous	Nucleus	BioGrid	66.031		D	2073
TFB4_YEAST	RNA polymerase II transcription factor B subunit 4 (General transcription and DNA repair factor IIH subunit TFB4) (TFIIH subunit TFB4) (RNA polymerase II transcription factor B 34 kDa subunit) (RNA polymerase II transcription factor B p34 subunit)	49	9.4	6.8	0.730216	Ambiguous	Nucleus		37.457		D	2755
BMS1_YEAST	Ribosome biogenesis protein BMS1	49	4.8	6.8	1.44349	Ambiguous	Both		135.571		D	2746
RGA2_YEAST	Rho-type GTPase-activating protein 2	23	37	6.6	0.176854	Ambiguous			113.291		D	2563
SWP82_YEAST	SWI/SNF global transcription activator complex subunit SWP82	48	23	6.6	0.282767	Ambiguous	Nucleus		70.276		D	1714
TAO3_YEAST	Cell morphogenesis protein PAG1 (Protein TAO3)	46	24	6.3	0.265593	Ambiguous		BioGrid	269.858		D	1595
PRP40_YEAST	Pre-mRNA-processing protein PRP40	46	4.1	6.3	1.55959	Ambiguous	Nucleus	BioGrid	69.065		D	942
HSF_YEAST	Heat shock factor protein (HSF) (Heat shock transcription factor) (HSTF)	45	2.5	6.3	2.55747	Ambiguous	Nucleus		93.282		D	319
SYT1_YEAST	Arf guanine nucleotide exchange factor SYT1 (Arf-GEF SYT1) (Suppressor of YPT3 protein 1)	44	2.4	6.2	2.56628	Ambiguous	Cytoplasm		137.583		D	2623
BUL1_YEAST	Ubiquitin ligase-binding protein BUL1 (Respiration deficiency suppressor 1)	43	4.1	6	1.47477	Ambiguous	Cytoplasm		109.174		D	1869
YMZ2_YEAST	WD repeat-containing protein YMR102C	43	16	5.9	0.371397	Ambiguous			94.254		D	2302
YTH1_YEAST	mRNA 3'-end-processing protein YTH1 (Yeast 30 kDa homolog 1)	42	3.8	5.9	1.56169	Ambiguous	Nucleus		24.553		D	2523
NOT1_YEAST	General negative regulator of transcription subunit 1 (Cell division cycle protein 39)	18	3.9	5.8	1.4949	Ambiguous	Both		240.279		D	684
GIS4_YEAST	Protein GIS4	39	42	5.5	0.129828	Ambiguous	Cytoplasm		87.14		D	2410
BNI1_YEAST	Protein BNI1 (Pointed projection formation protein 3) (Sensitive to high expression protein 5) (Synthetic lethal 39)	39	2	5.4	2.67053	Ambiguous	Cytoplasm		219.673		D	1678
RT04_YEAST	37S ribosomal protein MRP4, mitochondrial	38	4.2	5.2	1.24421	Ambiguous	Cytoplasm		44.152	MT	D	928
APC11_YEAST	Anaphase-promoting complex subunit 11 (EC 6.3.2.-)	37	3.9	5.2	1.34322	Ambiguous			18.865		D	2810
IRC20_YEAST	Uncharacterized ATP-dependent helicase IRC20 (EC 3.6.1.-) (Increased recombination centers protein 20)	37	5.7	5.1	0.897848	Ambiguous	Nucleus		180.344		D	2585
UTP4_YEAST	U3 small nucleolar RNA-associated protein 4 (U3 snoRNA-associated protein 4) (U three protein 4) (U3 protein 4 required for transcription) (t-UTP4)	37	3.1	5.1	1.66001	Ambiguous	Nucleus		87.801		D	2604
ATP7_YEAST	ATP synthase subunit d, mitochondrial	36	3.5	5	1.41087	Ambiguous	Cytoplasm		19.81		D	761
SNU71_YEAST	U1 small nuclear ribonucleoprotein component SNU71	36	3.5	5	1.42133	Ambiguous	Both		71.383		D	2008
NPR2_YEAST	Nitrogen permease regulator 2	35	20	4.9	0.238518	Ambiguous	Cytoplasm		69.859		D	1469
AFT1_YEAST	Iron-regulated transcriptional activator AFT1 (Activator of iron transcription protein 1)	35	14	4.9	0.343971	Ambiguous	Nucleus		77.683		D	545
PMD1_YEAST	Negative regulator of sporulation PMD1	35	5.4	4.9	0.898394	Ambiguous	Cytoplasm		195.383		D	887
FKH2_YEAST	Fork head protein homolog 2	35	5.9	4.8	0.817793	Ambiguous	Nucleus		94.374		D	1674
EFR3_YEAST	Protein EFR3	34	50	4.7	0.0936939	Ambiguous			89.191		D	2340
BIK1_YEAST	Nuclear fusion protein BIK1	33	5.4	4.6	0.851578	Ambiguous	Cytoplasm		51.092		D	332
PRI1_YEAST	DNA primase small subunit (EC 2.7.7.-) (DNA polymerase alpha:primase complex p48 subunit) (DNA polymerase-primase complex p48 subunit) (Pol alpha-primase complex p48 subunit) (DNA primase 48 kDa subunit)	33	3.8	4.6	1.20004	Ambiguous			47.69		D	309
SNX4_YEAST	Sorting nexin-4 (Autophagy-related protein 24) (Cytoplasm to vacuole targeting protein 13)	33	2.7	4.6	1.73335	Ambiguous	Cytoplasm		49.002		D	1800
RL24B_YEAST	60S ribosomal protein L24-B (L30) (RP29) (YL21)	33	2.3	4.6	1.95939	Ambiguous	Cytoplasm		17.548		D	595
ATG27_YEAST	Autophagy-related protein 27 (Enhancer of VPS34 missorting protein 1)	33	6	4.5	0.752032	Ambiguous	Cytoplasm		30.201	TM ER	D	1777
SYNM_YEAST	Asparagine--tRNA ligase, mitochondrial (EC 6.1.1.22) (Asparaginyl-tRNA synthetase) (AsnRS)	31	3.7	4.4	1.19419	Ambiguous	Cytoplasm		56.785	MT	D	632
RT102_YEAST	Regulator of Ty1 transposition protein 102	32	2.8	4.4	1.59517	Ambiguous	Nucleus		17.795		D	2051
SPS19_YEAST	Peroxisomal 2,4-dienoyl-CoA reductase SPS19 (EC 1.3.1.34) (Sporulation-specific protein SPX19)	32	2.6	4.4	1.69949	Ambiguous	Cytoplasm		31.109		D	862
YJ12B_YEAST	Transposon Ty1-JR2 Gag-Pol polyprotein (Gag-Pol-p199) (TY1A-TY1B) (Transposon Ty1 TYA-TYB polyprotein) (p190) [Cleaved into: Capsid protein (CA) (Gag-p45) (p54); Ty1 protease (PR) (EC 3.4.23.-) (Pol-p20) (p23); Integrase (IN) (Pol-p71) (p84) (p90); Reverse transcriptase/ribonuclease H (RT) (RT-RH) (EC 2.7.7.49) (EC 2.7.7.7) (EC 3.1.26.4) (Pol-p63) (p60)]	32	2.2	4.4	2.05045	Ambiguous	Both		198.618		D	1814
SEN1_YEAST	Helicase SEN1 (EC 3.6.4.-) (tRNA-splicing endonuclease positive effector)	31	7.5	4.3	0.573477	Ambiguous	Nucleus		252.497		D	2203
KIP3_YEAST	Kinesin-like protein KIP3	31	2.2	4.3	1.93552	Ambiguous	Cytoplasm		91.09		D	1958
DBP7_YEAST	ATP-dependent RNA helicase DBP7 (EC 3.6.4.13) (DEAD box protein 7)	30	28	4.2	0.150957	Ambiguous	Nucleus		83.308		D	1091
AYR1_YEAST	NADPH-dependent 1-acyldihydroxyacetone phosphate reductase (ADR) (EC 1.1.1.101) (1-acyl DHAP reductase) (Acyl/alkyl DHAP reductase) (Acylglycerone-phosphate reductase)	30	8.1	4.2	0.515363	Ambiguous	Cytoplasm		32.814		D	1598
SPC72_YEAST	Spindle pole component SPC72	30	6.8	4.2	0.616821	Ambiguous	Cytoplasm	NESdb, BioGrid	72.106		D	1460
PTP2_YEAST	Tyrosine-protein phosphatase 2 (EC 3.1.3.48) (Protein-tyrosine phosphatase 2) (PTPase 2)	29	27	4.1	0.153072	Ambiguous	Both		85.868		D	743
SPP1_YEAST	COMPASS component SPP1 (Complex proteins associated with SET1 protein SPP1) (Set1C component SPP1) (Suppressor of PRP protein 1)	29	9.6	4.1	0.425469	Ambiguous	Nucleus		41.468		D	2286
END3_YEAST	Actin cytoskeleton-regulatory complex protein END3 (Endocytosis protein 3)	29	4.3	4.1	0.940372	Ambiguous	Cytoplasm		40.297		D	1421
ART5_YEAST	Arrestin-related trafficking adapter 5	30	3.1	4.1	1.35079	Ambiguous			65.477		D	2018
YG21B_YEAST	Transposon Ty2-GR1 Gag-Pol polyprotein (TY2A-TY2B) (Transposon Ty2 TYA-TYB polyprotein) [Cleaved into: Capsid protein (CA); Ty2 protease (PR) (EC 3.4.23.-); Integrase (IN); Reverse transcriptase/ribonuclease H (RT) (RT-RH) (EC 2.7.7.49) (EC 2.7.7.7) (EC 3.1.26.4)]	29	6.8	4	0.588052	Ambiguous	Both		202.119		D	2874
SGF29_YEAST	SAGA-associated factor 29 (29 kDa SAGA-associated factor) (SAGA histone acetyltransferase complex 29 kDa subunit)	27	4.3	3.8	0.89223	Ambiguous	Nucleus		29.381		D	660
MS116_YEAST	ATP-dependent RNA helicase MSS116, mitochondrial (EC 3.6.4.13)	26	19	3.7	0.190119	Ambiguous	Cytoplasm		76.269	MT	D	394
BCD1_YEAST	Box C/D snoRNA protein 1	27	9.9	3.7	0.375322	Ambiguous	Both		42.334		D	1323
LCB5_YEAST	Sphingoid long chain base kinase 5 (LCB kinase 5) (EC 2.7.1.91) (Sphinganine kinase 5)	25	12	3.5	0.301673	Ambiguous	Cytoplasm		77.566		D	2531
ECM30_YEAST	Protein ECM30 (Extracellular mutant protein 30)	25	10	3.4	0.33666	Ambiguous	Cytoplasm		145.052		D	2601
LUC7_YEAST	Protein LUC7	25	5.9	3.4	0.58451	Ambiguous	Nucleus		30.195		D	2638
RT08_YEAST	37S ribosomal protein S8, mitochondrial	22	7.1	3.1	0.432289	Ambiguous	Cytoplasm		17.471		D	2368
GYP3_YEAST	GTPase-activating protein GYP3 (Multicopy suppressor of bud emergence 3) (Protein MSB3)	22	6.4	3.1	0.484176	Ambiguous	Cytoplasm		72.999		D	1874
ORC4_YEAST	Origin recognition complex subunit 4 (Origin recognition complex 56 kDa subunit)	22	8.5	3	0.35026	Ambiguous	Nucleus		60.705		D	2172
MET4_YEAST	Transcriptional activator of sulfur metabolism MET4 (Methionine-requiring protein 4)	22	3	3	1.0191	Ambiguous	Nucleus		74.373		D	809
PRI2_YEAST	DNA primase large subunit (EC 2.7.7.-) (DNA polymerase alpha:primase complex p58 subunit) (DNA polymerase-primase complex p58 subunit) (Pol alpha-primase complex p58 subunit) (DNA primase 58 kDa subunit)	21	2.5	2.9	1.18467	Ambiguous		BioGrid	62.263		D	502
PRP2_YEAST	Pre-mRNA-splicing factor ATP-dependent RNA helicase-like protein PRP2 (EC 3.6.4.13) (Pre-mRNA-processing protein 2)	19	51	2.6	0.0509722	Ambiguous	Nucleus		99.814		D	491
SNU56_YEAST	56 kDa U1 small nuclear ribonucleoprotein component	19	13	2.6	0.195854	Ambiguous	Nucleus		56.498		D	2363
SPT7_YEAST	Transcriptional activator SPT7	18	2.6	2.5	0.957148	Ambiguous	Nucleus		152.617		D	1013
HOS4_YEAST	Protein HOS4	18	3.3	2.4	0.744948	Ambiguous			123.556		D	1600
YP245_YEAST	Uncharacterized protein YPL245W	17	4.8	2.3	0.485924	Ambiguous	Both		52.257		D	2819
HIR2_YEAST	Protein HIR2 (Histone transcription regulator 2)	16	2.1	2.3	1.09034	Ambiguous	Nucleus		98.445		D	832
RM22_YEAST	54S ribosomal protein L22, mitochondrial	17	2.1	2.3	1.12163	Ambiguous	Cytoplasm		34.897	MT	D	2118
STE12_YEAST	Protein STE12	16	2	2.3	1.11983	Ambiguous	Nucleus		77.867		D	364
SRS2_YEAST	ATP-dependent DNA helicase SRS2 (EC 3.6.4.12)	15	43	2.1	0.0486782	Ambiguous	Nucleus		134.306		D	354
YG1T_YEAST	Uncharacterized protein YGR042W	15	3.8	2	0.52972	Ambiguous			31.025		D	2013
MCX1_YEAST	Mitochondrial clpX-like chaperone MCX1	11	3.3	2	0.611086	Ambiguous	Cytoplasm		57.946		D	1240
TDA9_YEAST	Probable transcription factor TDA9 (Topoisomerase I damage affected protein 9)	14	2.8	2	0.722663	Ambiguous	Nucleus		141.465		D	2444
ULS1_YEAST	ATP-dependent helicase ULS1 (EC 3.6.4.-) (Role in silencing protein 1) (Ubiquitin ligase for SUMO conjugates protein 1)	14	4.5	1.9	0.431703	Ambiguous	Nucleus		184.406		D	2707
ESL1_YEAST	EST/SMG-like protein 1	13	4.1	1.8	0.438952	Ambiguous			128.735		D	1587
CHK1_YEAST	Serine/threonine-protein kinase CHK1 (EC 2.7.11.1) (Checkpoint kinase 1)	13	3.2	1.8	0.546441	Ambiguous	Nucleus		60.017		D	1179
PMIP_YEAST	Mitochondrial intermediate peptidase (MIP) (EC 3.4.24.59)	13	18	1.7	0.0965106	Ambiguous	Cytoplasm		88.183	MT	D	1040
DRS1_YEAST	ATP-dependent RNA helicase DRS1 (EC 3.6.4.13) (Deficiency of ribosomal subunits protein 1)	12	6	1.7	0.286793	Ambiguous	Nucleus		84.843		D	923
PKH3_YEAST	Serine/threonine-protein kinase PKH3 (EC 2.7.11.1) (Pkb-activating kinase homolog 3)	11	11	1.5	0.136218	Ambiguous			100.476		D	2316
AZF1_YEAST	Asparagine-rich zinc finger protein AZF1	11	5.8	1.5	0.261037	Ambiguous	Nucleus		101.17		D	1666
DOT1_YEAST	Histone-lysine N-methyltransferase, H3 lysine-79 specific (EC 2.1.1.43) (Disrupter of telomere silencing protein 1) (Histone H3-K79 methyltransferase) (H3-K79-HMTase) (Lysine N-methyltransferase 4)	11	5.5	1.5	0.279888	Ambiguous	Nucleus		66.201		D	2391
YRB2_YEAST	Ran-specific GTPase-activating protein 2 (Ran-binding protein 2) (RANBP2)	1.2	320	10000	31.933	CRM1 Cofactor	Nucleus	BioGrid	36.054		D.B NTR_CRM1 cofactor	1619
YRB1_YEAST	Ran-binding protein 1 (Chromosome stability protein 20) (Perinuclear array-localized protein) (Ran-specific GTPase-activating protein 1) (RANBP1)	1.5	0	86	1831.51	CRM1 Cofactor	Both	BioGrid	22.953		D.B NTR_CRM1 cofactor	1686
IMA1_YEAST	Importin subunit alpha (Karyopherin subunit alpha) (Karyopherin-60) (Serine-rich RNA polymerase I suppressor protein)	21	8.3	1500	176.519	NTR	Both	BioGrid	60.441		D.B. NTR	2270
IMB1_YEAST	Importin subunit beta-1 (Importin-95) (Karyopherin subunit beta-1) (Karyopherin-95)	10	0.4	1.4	3.37307	NTR	Both		94.776		D.B. NTR	2529
IMB4_YEAST	Importin subunit beta-4 (Importin-123) (Karyopherin subunit beta-4) (Karyopherin-123) (Ran-binding protein YRB4)	0.2	0	1.2	31.0037	NTR	Both		122.601		D.B. NTR	1526
IMB3_YEAST	Importin subunit beta-3 (Karyopherin subunit beta-3) (Karyopherin-121) (Protein secretion enhancer 1)	0	0	0	1.2847	NTR	Both		121.031		D.B. NTR	792
KA120_YEAST	Importin beta-like protein KAP120 (Karyopherin-120)	0	0	0	24.5478	NTR	Both		119.623		D.B. NTR	2279
SXM1_YEAST	Importin beta SMX1 (Suppressor of mRNA export mutant protein 1) (karyopherin-108)	0	0	0	2.78452	NTR	Both		108.405		D.B. NTR	2395
NSP1_YEAST	Nucleoporin NSP1 (Nuclear pore protein NSP1) (Nucleoskeletal-like protein) (p110)	1.6	150	12000	82.3723	NUP	Both	BioGrid	86.516		D.B. Nup	386
NUP82_YEAST	Nucleoporin NUP82 (Nuclear pore protein NUP82)	1.2	170	4100	24.4175	NUP	Both	BioGrid	82.085		D.B. Nup	1577
NU159_YEAST	Nucleoporin NUP159 (Nuclear pore protein NUP159)	2.3	100	2900	28.3633	NUP	Both	BioGrid	158.908		D.B. Nup	1599
GLE1_YEAST	Nucleoporin GLE1 (Nuclear pore protein GLE1) (RNA export factor GLE1)	2.6	530	1800	3.42262	NUP	Both		62.073		D.B. Nup	2867
NU100_YEAST	Nucleoporin NUP100/NSP100 (Nuclear pore protein NUP100/NSP100)	2.1	580	1200	2.07058	NUP	Both	BioGrid	99.988		D.B. Nup	2253
NUP57_YEAST	Nucleoporin NUP57 (Nuclear pore protein NUP57)	1.3	1400	1100	0.806947	NUP	Both	BioGrid	57.499		D.B. Nup	1882
NUP2_YEAST	Nucleoporin NUP2 (Nuclear pore protein NUP2) (p95)	13	61	1100	17.1931	NUP	Both		77.881		D.B. Nup	843
NU116_YEAST	Nucleoporin NUP116/NSP116 (Nuclear pore protein NUP116/NSP116)	2.5	500	940	1.88051	NUP	Both	BioGrid	116.234		D.B. Nup	2254
NIC96_YEAST	Nucleoporin NIC96 (96 kDa nucleoporin-interacting component) (Nuclear pore protein NIC96)	1.8	410	870	2.11662	NUP	Both		96.174		D.B. Nup	980
NUP42_YEAST	Nucleoporin NUP42 (Nuclear pore protein NUP42)	2.6	4900	610	0.0585197	NUP	Both	BioGrid	42.778		D.B. Nup	1890
GLE2_YEAST	Nucleoporin GLE2 (Nuclear pore protein GLE2) (poly(A) RNA export protein RAE1)	2.5	4900	500	0.0585197	NUP	Both		40.523		D.B. Nup	1525
NUP49_YEAST	Nucleoporin NUP49/NSP49 (Nuclear pore protein NUP49/NSP49)	2	4900	480	0.0585197	NUP	Both	BioGrid	49.142		D.B. Nup	2239
NU145_YEAST	Nucleoporin NUP145 (EC 3.4.21.-) (Nuclear pore protein NUP145) [Cleaved into: Nucleoporin NUP145N (N-NUP145); Nucleoporin NUP145C (C-NUP145)]	33	72	110	1.60438	NUP	Both	BioGrid	145.661		D.B. Nup	1891
NUP60_YEAST	Nucleoporin NUP60 (Nuclear pore protein NUP60)	530	130	74	0.550296	NUP	Both		59.039		D.B. Nup	1454
SEH1_YEAST	Nucleoporin SEH1 (Nuclear pore protein SEH1) (SEC13 homolog 1)	330	770	45	0.0585197	NUP	Both		39.123		D.B. Nup	1939
NUP1_YEAST	Nucleoporin NUP1 (Nuclear pore protein NUP1)	150	100	21	0.207401	NUP	Both	BioGrid	113.581		D.B. Nup	509
NU192_YEAST	Nucleoporin NUP192 (Nuclear pore protein NUP192)	53	2.4	3	1.21807	NUP	Both		191.535	TM	D.B. Nup	1799
NU120_YEAST	Nucleoporin NUP120 (Nuclear pore protein NUP120)	0	0	0	2.96609	NUP	Both		120.448		D.B. Nup	1033
NU133_YEAST	Nucleoporin NUP133 (Nuclear pore protein NUP133)	0	0	0	19.047	NUP	Both	BioGrid	133.321		D.B. Nup	1112
NUP84_YEAST	Nucleoporin NUP84 (Nuclear pore protein NUP84)	0	0	0	5.46363	NUP	Both		83.635		D.B. Nup	1931
NUP85_YEAST	Nucleoporin NUP85 (Nuclear pore protein NUP85)	0	0	0	7.29366	NUP	Both		84.898		D.B. Nup	1758
EF1A_YEAST	Elongation factor 1-alpha (EF-1-alpha) (Eukaryotic elongation factor 1A) (eEF1A) (Translation elongation factor 1A)	4.6	1.9	44000	23202.7	Ambiguous	Cytoplasm		50.033		D.C.	113
HSP7F_YEAST	Heat shock protein homolog SSE1 (Chaperone protein MSI3)	9.8	4.7	21000	4429.55	Ambiguous	Cytoplasm		77.366		D.C.	868
PMG1_YEAST	Phosphoglycerate mutase 1 (PGAM 1) (EC 5.4.2.11) (BPG-dependent PGAM 1) (MPGM 1) (Phosphoglyceromutase 1)	16	0.7	19000	29323.8	Ambiguous	Cytoplasm		27.609		D.C.	93
HSP72_YEAST	Heat shock protein SSA2	4.2	0.9	8000	9022.17	Ambiguous	Cytoplasm		69.47		D.C.	312
BMH1_YEAST	Protein BMH1	83	1.5	7800	5116.65	Ambiguous			30.091		D.C.	740
LEU3_YEAST	3-isopropylmalate dehydrogenase (3-IPM-DH) (IMDH) (EC 1.1.1.85) (Beta-IPM dehydrogenase)	6.2	2.2	5000	2241.23	Ambiguous	Cytoplasm		38.953		D.C.	125
G3P3_YEAST	Glyceraldehyde-3-phosphate dehydrogenase 3 (GAPDH 3) (EC 1.2.1.12)	2	0.1	3100	58117	Ambiguous	Cytoplasm		35.747		D.C.	65
DBP5_YEAST	ATP-dependent RNA helicase DBP5 (EC 3.6.4.13) (DEAD box protein 5) (Helicase CA5/6) (Ribonucleic acid-trafficking protein 8)	2.3	12	2900	246.828	Ambiguous	Both	BioGrid	53.874		D.C.	501
PUR92_YEAST	Bifunctional purine biosynthesis protein ADE17 [Includes: Phosphoribosylaminoimidazolecarboxamide formyltransferase (EC 2.1.2.3) (5-aminoimidazole-4-carboxamide ribonucleotide formyltransferase) (AICAR transformylase); IMP cyclohydrolase (EC 3.5.4.10) (ATIC) (IMP synthase) (Inosinicase)]	18	0.8	2400	3010.95	Ambiguous			65.263		D.C.	1140
ENO2_YEAST	Enolase 2 (EC 4.2.1.11) (2-phospho-D-glycerate hydro-lyase 2) (2-phosphoglycerate dehydratase 2)	0.9	0	2400	89730.2	Ambiguous	Cytoplasm		46.914		D.C.	88
PDC1_YEAST	Pyruvate decarboxylase isozyme 1 (EC 4.1.1.-) (EC 4.1.1.1)	0.9	0.1	2200	26294.1	Ambiguous	Both		61.495		D.C.	167
RS12_YEAST	40S ribosomal protein S12	140	1.6	1600	1051.79	Ambiguous	Cytoplasm		15.472		D.C.	1878
KPYK1_YEAST	Pyruvate kinase 1 (PK 1) (EC 2.7.1.40) (cell division cycle protein 19)	1	0.1	1600	31204.2	Ambiguous			54.545		D.C.	73
MAS5_YEAST	Mitochondrial protein import protein MAS5 (Yeast dnaJ protein 1)	3.1	4.8	1500	313.291	Ambiguous	Cytoplasm		44.671		D.C.	657
ADH1_YEAST	Alcohol dehydrogenase 1 (EC 1.1.1.1) (Alcohol dehydrogenase I) (YADH-1)	1.1	0	1500	32823.3	Ambiguous	Cytoplasm		36.849		D.C.	62
PGK_YEAST	Phosphoglycerate kinase (EC 2.7.2.3)	1	0	1500	36550.6	Ambiguous	Cytoplasm		44.738		D.C.	74
GLYC_YEAST	Serine hydroxymethyltransferase, cytosolic (SHMT) (EC 2.1.2.1) (Glycine hydroxymethyltransferase) (Serine methylase)	6	0.3	1400	5445.53	Ambiguous	Cytoplasm		52.218		D.C.	1130
IF4A_YEAST	ATP-dependent RNA helicase eIF4A (EC 3.6.4.13) (Eukaryotic initiation factor 4A) (eIF-4A) (Stimulator factor I 37 kDa component) (Translation initiation factor 1/2) (p37)	2.7	0.3	1300	4684.15	Ambiguous	Cytoplasm	BioGrid	44.697		D.C.	306
ALF_YEAST	Fructose-bisphosphate aldolase (FBP aldolase) (FBPA) (EC 4.1.2.13) (Fructose-1,6-bisphosphate aldolase)	1	0.1	1300	23040.4	Ambiguous			39.621		D.C.	374
RL26B_YEAST	60S ribosomal protein L26-B (L33) (YL33)	8900	1.7	1200	723.014	Ambiguous	Cytoplasm		14.235		D.C.	2012
HSP77_YEAST	Heat shock protein SSC1, mitochondrial (Endonuclease SceI 75 kDa subunit) (Endo.SceI 75 kDa subunit) (mtHSP70)	3.6	0.5	1100	2381.75	Ambiguous	Both		70.628	MT	D.C.	282
HSP71_YEAST	Heat shock protein SSA1 (Heat shock protein YG100)	4.9	0.8	1000	1290.71	Ambiguous	Cytoplasm		69.657		D.C.	311
TMA20_YEAST	Translation machinery-associated protein 20	6600	1.8	910	518.445	Ambiguous	Cytoplasm		20.278		D.C.	2196
ACT_YEAST	Actin	2.4	0.2	860	4306.19	Ambiguous	Cytoplasm	NESdb indoubt	41.69		D.C.	2183
EF3A_YEAST	Elongation factor 3A (EF-3) (EF-3A) (Eukaryotic elongation factor 3) (eEF3) (Translation elongation factor 3A) (Yeast elongation factor 3)	3.2	0.1	830	6402.36	Ambiguous	Cytoplasm		115.945		D.C.	423
RL25_YEAST	60S ribosomal protein L25 (RP16L) (YL25) (YP42')	280	1.9	820	438.406	Ambiguous	Cytoplasm		15.758		D.C.	127
PURA_YEAST	Adenylosuccinate synthetase (AMPSase) (AS-synthetase) (AdSS) (EC 6.3.4.4) (IMP--aspartate ligase)	17	0.9	810	942.479	Ambiguous	Cytoplasm		48.279		D.C.	2190
IF5A1_YEAST	Eukaryotic translation initiation factor 5A-1 (eIF-5A-1) (Hypusine-containing protein HP2) (eIF-4D)	62	0.1	750	5646.21	Ambiguous	Cytoplasm		17.114		D.C.	581
RL1B_YEAST	60S ribosomal protein L1-B (L10a)	110	1.4	740	514.481	Ambiguous	Cytoplasm		24.486		D.C.	294
RL30_YEAST	60S ribosomal protein L30 (L32) (RP73) (YL38)	300	1.2	730	595.239	Ambiguous	Cytoplasm		11.415		D.C.	369
RL13B_YEAST	60S ribosomal protein L13-B	5200	1.9	720	374.026	Ambiguous	Cytoplasm		22.525		D.C.	1556
BMH2_YEAST	Protein BMH2	100	1.2	720	584.057	Ambiguous	Both		31.061		D.C.	1004
RL35B_YEAST	60S ribosomal protein L35-B	5200	1.2	720	600.544	Ambiguous	Cytoplasm		13.91		D.C.	304
TBB_YEAST	Tubulin beta chain (Beta-tubulin)	8	1.7	700	422.824	Ambiguous	Cytoplasm	BioGrid	50.923		D.C.	107
METK2_YEAST	S-adenosylmethionine synthase 2 (AdoMet synthase 2) (EC 2.5.1.6) (Methionine adenosyltransferase 2) (MAT 2)	3.8	0.5	700	1362.81	Ambiguous			42.256		D.C.	471
ARB1_YEAST	ABC transporter ATP-binding protein ARB1 (ATP-binding cassette protein involved in ribosome biogenesis 1)	9.5	0.9	680	763.448	Ambiguous	Both		68.377		D.C.	1510
COPA_YEAST	Coatomer subunit alpha (Alpha-coat protein) (Alpha-COP) (Retrieval from endoplasmic reticulum protein 1) (Secretory protein 22) (Suppressor of osmo-sensitivity 1)	47	1.7	630	376.789	Ambiguous	Cytoplasm		135.607		D.C.	2071
RS25A_YEAST	40S ribosomal protein S25-A (RP45) (S31) (YS23)	4500	1.7	630	371.436	Ambiguous	Cytoplasm		12.039		D.C.	269
SSZ1_YEAST	Ribosome-associated complex subunit SSZ1 (DnaK-related protein SSZ1) (Heat shock protein 70 homolog SSZ1) (Pleiotropic drug resistance protein 13)	3.5	0.3	620	2522.28	Ambiguous	Cytoplasm		58.238		D.C.	1332
COPB2_YEAST	Coatomer subunit beta' (Beta'-coat protein) (Beta'-COP)	39	1.7	600	353.108	Ambiguous	Cytoplasm		99.445		D.C.	1672
RLA0_YEAST	60S acidic ribosomal protein P0 (A0) (L10E)	42	1.5	600	395.133	Ambiguous	Cytoplasm		33.717		D.C.	141
C1TC_YEAST	C-1-tetrahydrofolate synthase, cytoplasmic (C1-THF synthase) [Includes: Methylenetetrahydrofolate dehydrogenase (EC 1.5.1.5); Methenyltetrahydrofolate cyclohydrolase (EC 3.5.4.9); Formyltetrahydrofolate synthetase (EC 6.3.4.3)]	8.1	0.3	570	2091.57	Ambiguous	Both		102.205		D.C.	201
RS2_YEAST	40S ribosomal protein S2 (Omnipotent suppressor protein SUP44) (RP12) (S4) (YS5)	3900	1.3	540	412.244	Ambiguous	Both		27.45		D.C.	654
VATB_YEAST	V-type proton ATPase subunit B (V-ATPase subunit B) (V-ATPase 57 kDa subunit) (Vacuolar proton pump subunit B)	2.8	0.3	520	1545.15	Ambiguous			57.749		D.C.	417
RL21A_YEAST	60S ribosomal protein L21-A	3600	1.9	500	261.879	Ambiguous	Cytoplasm		18.242		D.C.	2259
FKBP3_YEAST	FK506-binding nuclear protein (EC 5.2.1.8) (FKBP-70) (Nucleolar proline isomerase) (Peptidyl-prolyl cis-trans isomerase) (PPIase) (Proline rotamase)	100	1.3	500	397.684	Ambiguous	Nucleus		46.553		D.C.	1395
CDC48_YEAST	Cell division control protein 48	29	0.5	500	1079.02	Ambiguous	Cytoplasm		91.996		D.C.	686
AK_YEAST	Aspartokinase (EC 2.7.2.4) (Aspartate kinase)	20	0.9	490	534.191	Ambiguous			58.11		D.C.	318
HSC82_YEAST	ATP-dependent molecular chaperone HSC82 (82 kDa heat shock cognate protein) (Heat shock protein Hsp90 constitutive isoform)	0.9	0.1	460	8838.03	Ambiguous	Cytoplasm	BioGrid	80.9		D.C.	390
COPG_YEAST	Coatomer subunit gamma (Gamma-coat protein) (Gamma-COP)	110	1.4	450	336.605	Ambiguous	Cytoplasm		104.831		D.C.	775
HOSC_YEAST	Homocitrate synthase, cytosolic isozyme (EC 2.3.3.14)	1.2	0.1	450	3637.27	Ambiguous	Cytoplasm		47.099		D.C.	1876
NOP3_YEAST	Nucleolar protein 3 (Mitochondrial targeting suppressor 1 protein) (Nuclear polyadenylated RNA-binding protein 1)	4.5	4.2	440	107.107	Ambiguous	Nucleus	BioGrid	45.407		D.C.	2226
RS19B_YEAST	40S ribosomal protein S19-B (RP55B) (S16a) (YS16B)	3200	1.7	440	264.236	Ambiguous	Cytoplasm		15.891		D.C.	222
IF4F1_YEAST	Eukaryotic initiation factor 4F subunit p150 (eIF-4F p150) (eIF4F p150) (eIF4G1) (mRNA cap-binding protein complex subunit p150)	52	1.5	440	295.836	Ambiguous	Cytoplasm		107.101		D.C.	1473
EF2_YEAST	Elongation factor 2 (EF-2) (Eukaryotic elongation factor 2) (eEF2) (Ribosomal translocase) (Translation elongation factor 2)	1.7	0.1	440	8595.37	Ambiguous	Cytoplasm		93.289		D.C.	786
FIMB_YEAST	Fimbrin (ABP67)	7.7	0.7	430	637.466	Ambiguous			71.773		D.C.	873
GFA1_YEAST	Glutamine--fructose-6-phosphate aminotransferase [isomerizing] (GFAT) (EC 2.6.1.16) (D-fructose-6-phosphate amidotransferase) (Hexosephosphate aminotransferase)	7.4	0.7	430	659.025	Ambiguous			80.047		D.C.	380
TPIS_YEAST	Triosephosphate isomerase (TIM) (EC 5.3.1.1) (Triose-phosphate isomerase)	0.9	0	420	32217.8	Ambiguous			26.795		D.C.	92
RL14A_YEAST	60S ribosomal protein L14-A	2900	1	400	389.171	Ambiguous	Cytoplasm		15.167		D.C.	1085
LYS12_YEAST	Homoisocitrate dehydrogenase, mitochondrial (HIcDH) (EC 1.1.1.87)	1.1	0.2	400	2120.36	Ambiguous	Cytoplasm	BioGrid	40.069	MT	D.C.	1611
IF1A_YEAST	Eukaryotic translation initiation factor 1A (eIF-1A) (Eukaryotic translation initiation factor 4C) (eIF-4C)	180	0.5	390	824.347	Ambiguous			17.435		D.C.	1396
PAA1_YEAST	Polyamine N-acetyltransferase 1 (EC 2.3.1.-) (Arylalkylamine N-acetyltransferase homolog) (scAANAT)	7.4	0.2	390	1613.89	Ambiguous	Cytoplasm		21.947		D.C.	2912
H2B2_YEAST	Histone H2B.2	3.8	2.8	380	134.915	Ambiguous	Nucleus		14.237		D.C.	103
LSM12_YEAST	Protein LSM12 (Sm-like protein 12)	4.1	1.1	380	353.232	Ambiguous	Both		21.314		D.C.	1360
RS27A_YEAST	Ubiquitin-40S ribosomal protein S31 [Cleaved into: Ubiquitin; 40S ribosomal protein S31 (CEP76) (S37) (YS24)]	270	0.3	380	1307.41	Ambiguous	Both		17.216		D.C.	157
SPT16_YEAST	FACT complex subunit SPT16 (Cell division control protein 68) (Facilitates chromatin transcription complex subunit SPT16) (Suppressor of Ty protein 16)	1900	1.2	370	301.134	Ambiguous	Nucleus		118.63		D.C.	855
TBA1_YEAST	Tubulin alpha-1 chain	5	1.6	350	213.449	Ambiguous	Cytoplasm	BioGrid	49.8		D.C.	261
TCPG_YEAST	T-complex protein 1 subunit gamma (TCP-1-gamma) (CCT-gamma)	23	1.5	340	226.986	Ambiguous	Cytoplasm		58.814		D.C.	1425
DYL1_YEAST	Dynein light chain 1, cytoplasmic	1.8	7.9	330	42.2613	Ambiguous	Cytoplasm		10.441		D.C.	2256
VPS1_YEAST	Vacuolar protein sorting-associated protein 1	2400	1.6	330	211.701	Ambiguous	Cytoplasm		78.737		D.C.	526
RL18B_YEAST	60S ribosomal protein L18-B (RP28)	2300	1.6	320	206.114	Ambiguous	Cytoplasm		20.563		D.C.	297
COPB_YEAST	Coatomer subunit beta (Beta-coat protein) (Beta-COP)	50	1.3	320	256.519	Ambiguous	Cytoplasm		109.019		D.C.	1671
TCPB_YEAST	T-complex protein 1 subunit beta (TCP-1-beta) (CCT-beta)	11	0.9	320	352.522	Ambiguous	Cytoplasm		57.203		D.C.	1424
METK1_YEAST	S-adenosylmethionine synthase 1 (AdoMet synthase 1) (EC 2.5.1.6) (Methionine adenosyltransferase 1) (MAT 1)	4.6	0.7	320	447.402	Ambiguous		BioGrid	41.818		D.C.	313
ACAC_YEAST	Acetyl-CoA carboxylase (ACC) (EC 6.4.1.2) (Fatty acid synthetase 3) (mRNA transport-defective protein 7) [Includes: Biotin carboxylase (EC 6.3.4.14)]	33	1.2	310	249.099	Ambiguous	Cytoplasm		250.353		D.C.	2214
IDH2_YEAST	Isocitrate dehydrogenase [NAD] subunit 2, mitochondrial (EC 1.1.1.41) (Isocitric dehydrogenase) (NAD(+)-specific ICDH)	3.6	0.2	310	1629.5	Ambiguous	Cytoplasm		39.739	MT	D.C.	723
IPYR_YEAST	Inorganic pyrophosphatase (EC 3.6.1.1) (Pyrophosphate phospho-hydrolase) (PPase)	10	0.1	300	4178.15	Ambiguous	Cytoplasm		32.3		D.C.	81
TCPD_YEAST	T-complex protein 1 subunit delta (TCP-1-delta) (CCT-delta)	26	1	290	296.546	Ambiguous	Cytoplasm		57.604		D.C.	1426
RL43B_YEAST	60S ribosomal protein L43-B (L37a) (YL35)	1900	1.1	270	249.957	Ambiguous	Cytoplasm		10.091		D.C.	285
RL33A_YEAST	60S ribosomal protein L33-A (L37) (RP47) (YL37)	1800	0.9	250	293.816	Ambiguous	Cytoplasm		12.154		D.C.	151
ARF1_YEAST	ADP-ribosylation factor 1	2.3	0.1	250	4848.94	Ambiguous	Cytoplasm		20.529		D.C.	323
YGL7_YEAST	Uncharacterized protein YGL117W	1.1	8.2	240	29.1319	Ambiguous			30.755		D.C.	1979
RUVB1_YEAST	RuvB-like protein 1 (RUVBL1) (EC 3.6.4.12) (TIP49-homology protein 1) (TIP49a homolog)	6.5	0.9	240	269.838	Ambiguous	Nucleus		50.453		D.C.	2377
RS23B_YEAST	40S ribosomal protein S23-B (RP37) (S28) (YS14)	1700	1.8	230	130.312	Ambiguous	Cytoplasm		16.038		D.C.	287
RL10_YEAST	60S ribosomal protein L10 (L9) (Ubiquinol-cytochrome C reductase complex subunit VI-requiring protein)	120	1.6	230	143.88	Ambiguous	Cytoplasm		25.361		D.C.	1669
TRPE_YEAST	Anthranilate synthase component 1 (EC 4.1.3.27) (Anthranilate synthase component I)	22	0.5	230	466.355	Ambiguous			56.768		D.C.	84
SYYC_YEAST	Tyrosine--tRNA ligase, cytoplasmic (EC 6.1.1.1) (Tyrosyl-tRNA synthetase) (TyrRS)	140	0.4	230	661.225	Ambiguous	Both		44.02		D.C.	1118
SYNC_YEAST	Asparagine--tRNA ligase, cytoplasmic (EC 6.1.1.22) (Asparaginyl-tRNA synthetase) (AsnRS)	2.6	0.1	230	2481.31	Ambiguous	Cytoplasm	BioGrid	62.207		D.C.	1293
TCTP_YEAST	Translationally-controlled tumor protein homolog (TCTP) (Microtubule and mitochondria-interacting protein 1) (Translation machinery-associated protein 19)	8	0.1	230	2916.7	Ambiguous	Cytoplasm		18.741		D.C.	1029
TSA1_YEAST	Peroxiredoxin TSA1 (EC 1.11.1.15) (Cytoplasmic thiol peroxidase 1) (cTPx 1) (PRP) (Thiol-specific antioxidant protein 1) (Thioredoxin peroxidase)	1.9	0	230	13285.5	Ambiguous	Cytoplasm		21.59		D.C.	1007
TCPH_YEAST	T-complex protein 1 subunit eta (TCP-1-eta) (CCT-eta)	58	1.2	220	185.663	Ambiguous	Cytoplasm		59.736		D.C.	1705
ATPA_YEAST	ATP synthase subunit alpha, mitochondrial	2.6	1.1	220	211.732	Ambiguous	Cytoplasm		58.608	MT	D.C.	204
ILV5_YEAST	Ketol-acid reductoisomerase, mitochondrial (EC 1.1.1.86) (Acetohydroxy-acid reductoisomerase) (Alpha-keto-beta-hydroxylacyl reductoisomerase)	1.4	0	220	6466.27	Ambiguous	Cytoplasm		44.368	MT	D.C.	166
POB3_YEAST	FACT complex subunit POB3 (Facilitates chromatin transcription complex subunit POB3)	810	1.2	210	174.045	Ambiguous	Nucleus		62.994		D.C.	2450
TCPA_YEAST	T-complex protein 1 subunit alpha (TCP-1-alpha) (CCT-alpha)	42	0.8	210	280.824	Ambiguous	Cytoplasm		60.481		D.C.	342
PFKA1_YEAST	ATP-dependent 6-phosphofructokinase subunit alpha (EC 2.7.1.11) (ATP-dependent 6-phosphofructokinase) (ATP-PFK) (Phosphofructokinase 1) (Phosphohexokinase)	2.1	0.1	210	2881.9	Ambiguous	Cytoplasm		107.97		D.C.	430
NIP7_YEAST	60S ribosome subunit biogenesis protein NIP7 (Nuclear import protein 7)	1500	1.7	200	121.456	Ambiguous	Both		20.381		D.C.	2744
GCH1_YEAST	GTP cyclohydrolase 1 (EC 3.5.4.16) (GTP cyclohydrolase I) (GTP-CH-I)	96	1.1	200	186.998	Ambiguous			27.769		D.C.	1921
RRP5_YEAST	rRNA biogenesis protein RRP5 (Ribosomal RNA-processing protein 5) (U3 small nucleolar RNA-associated protein RRP5) (U3 snoRNA-associated protein RRP5)	400	1	200	194.699	Ambiguous	Nucleus		193.134		D.C.	2476
TCPZ_YEAST	T-complex protein 1 subunit zeta (TCP-1-zeta) (CCT-zeta)	30	0.7	200	279.069	Ambiguous	Cytoplasm		59.924		D.C.	1427
MAOM_YEAST	NAD-dependent malic enzyme, mitochondrial (NAD-ME) (EC 1.1.1.38)	17	0.4	200	550.834	Ambiguous	Cytoplasm	BioGrid	74.376	MT	D.C.	1049
ZUO1_YEAST	Zuotin (DnaJ-related protein ZUO1) (J protein ZUO1) (Heat shock protein 40 homolog ZUO1) (Ribosome-associated complex subunit ZUO1)	11	0.2	200	905.182	Ambiguous	Cytoplasm		49.02		D.C.	852
SYKC_YEAST	Lysine--tRNA ligase, cytoplasmic (EC 6.1.1.6) (Lysyl-tRNA synthetase) (LysRS)	4.7	0.1	200	1999.73	Ambiguous	Cytoplasm		67.959		D.C.	391
LEUC_YEAST	3-isopropylmalate dehydratase (EC 4.2.1.33) (Alpha-IPM isomerase) (IPMI) (Isopropylmalate isomerase)	1.1	0	200	4149.2	Ambiguous			85.794		D.C.	212
RPB1_YEAST	DNA-directed RNA polymerase II subunit RPB1 (RNA polymerase II subunit 1) (RNA polymerase II subunit B1) (EC 2.7.7.6) (DNA-directed RNA polymerase III largest subunit) (RNA polymerase II subunit B220)	110	1.3	190	140.104	Ambiguous	Nucleus		191.612		D.C.	120
ARPC2_YEAST	Actin-related protein 2/3 complex subunit 2 (Arp2/3 complex 34 kDa subunit) (p34-ARC)	13	0.7	190	292.138	Ambiguous	Cytoplasm		39.566		D.C.	2080
RS27B_YEAST	40S ribosomal protein S27-B (RP61) (YS20)	1400	0.6	190	335.708	Ambiguous	Cytoplasm		8.865		D.C.	1039
KPR3_YEAST	Ribose-phosphate pyrophosphokinase 3 (EC 2.7.6.1) (Phosphoribosyl pyrophosphate synthase 3)	3.5	0.4	190	496.957	Ambiguous	Cytoplasm		35.124		D.C.	1283
YP12B_YEAST	Transposon Ty1-PR1 Gag-Pol polyprotein (Gag-Pol-p199) (TY1A-TY1B) (Transposon Ty1 TYA-TYB polyprotein) (p190) [Cleaved into: Capsid protein (CA) (Gag-p45) (p54); Ty1 protease (PR) (EC 3.4.23.-) (Pol-p20) (p23); Integrase (IN) (Pol-p71) (p84) (p90); Reverse transcriptase/ribonuclease H (RT) (RT-RH) (EC 2.7.7.49) (EC 2.7.7.7) (EC 3.1.26.4) (Pol-p63) (p60)]	80	1.6	180	116.017	Ambiguous	Both		198.568		D.C.	276
MPG1_YEAST	Mannose-1-phosphate guanyltransferase (EC 2.7.7.13) (ATP-mannose-1-phosphate guanylyltransferase) (GDP-mannose pyrophosphorylase) (NDP-hexose pyrophosphorylase)	2.1	0.1	180	2292.88	Ambiguous	Cytoplasm	BioGrid	39.566		D.C.	1688
GPP1_YEAST	Glycerol-1-phosphate phosphohydrolase 1 (EC 3.1.3.21) ((DL)-glycerol-3-phosphatase 1) (Related to HOR2 protein 2)	0.7	0	180	12182.2	Ambiguous	Both		27.947		D.C.	1663
MDHP_YEAST	Malate dehydrogenase, peroxisomal (EC 1.1.1.37)	32	1	170	168.786	Ambiguous	Cytoplasm		37.186		D.C.	810
SYDC_YEAST	Aspartate--tRNA ligase, cytoplasmic (EC 6.1.1.12) (Aspartyl-tRNA synthetase) (AspRS)	5.2	0.1	170	2180.05	Ambiguous	Cytoplasm		63.516		D.C.	131
H2AZ_YEAST	Histone H2A.Z	1.3	5.5	160	29.4822	Ambiguous	Nucleus		14.283		D.C.	2952
RLI1_YEAST	Translation initiation factor RLI1 (ATP-binding cassette sub-family E member RLI1) (RNase L inhibitor)	900	1	160	159.525	Ambiguous	Both		68.34		D.C.	2303
GCN20_YEAST	Protein GCN20	13	0.5	160	293.878	Ambiguous			85.027		D.C.	1711
RS28B_YEAST	40S ribosomal protein S28-B (S33) (YS27)	1200	0.4	160	405.814	Ambiguous	Cytoplasm		7.565		D.C.	272
VATA_YEAST	V-type proton ATPase catalytic subunit A (V-ATPase subunit A) (EC 3.6.3.14) (Vacuolar proton pump subunit A) [Cleaved into: Endonuclease PI-SceI (EC 3.1.-.-) (Sce VMA intein) (VMA1-derived endonuclease) (VDE)]	1.9	0.1	160	1836.35	Ambiguous	Cytoplasm		118.637		D.C.	438
ACS2_YEAST	Acetyl-coenzyme A synthetase 2 (EC 6.2.1.1) (Acetate--CoA ligase 2) (Acyl-activating enzyme 2)	1.1	0	160	3519.68	Ambiguous	Both		75.492		D.C.	1933
RPAB3_YEAST	DNA-directed RNA polymerases I, II, and III subunit RPABC3 (RNA polymerases I, II, and III subunit ABC3) (ABC14.4) (ABC14.5) (DNA-directed RNA polymerases I, II, and III 14.5 kDa polypeptide)	130	0.7	150	201.877	Ambiguous	Nucleus		16.511		D.C.	498
COPZ_YEAST	Coatomer subunit zeta (Zeta-coat protein) (Zeta-COP)	1100	0.6	150	250.542	Ambiguous	Cytoplasm		21.688		D.C.	2067
BCA1_YEAST	Branched-chain-amino-acid aminotransferase, mitochondrial (BCAT) (EC 2.6.1.42) (Protein ECA39) (Protein TWT1)	1.3	0.1	150	2346.95	Ambiguous	Cytoplasm		43.596	MT	D.C.	1390
ATPG_YEAST	ATP synthase subunit gamma, mitochondrial (F-ATPase gamma subunit)	7.3	5	140	27.8031	Ambiguous	Cytoplasm		34.351	MT	D.C.	1154
RCK2_YEAST	Serine/threonine-protein kinase RCK2 (EC 2.7.11.1) (CAM kinase-like protein kinase CLK1)	160	1.8	140	80.7727	Ambiguous	Cytoplasm		68.062		D.C.	1269
H4_YEAST	Histone H4	1	1.5	140	90.3153	Ambiguous	Nucleus		11.368		D.C.	104
ARP2_YEAST	Actin-related protein 2 (Actin-like protein ARP2) (Actin-like protein 2)	10	1.4	140	102.729	Ambiguous	Cytoplasm		44.074		D.C.	807
RL23B_YEAST	60S ribosomal protein L23-B (L17a) (YL32)	1000	0.8	140	173.803	Ambiguous	Cytoplasm		14.473		D.C.	293
SER33_YEAST	D-3-phosphoglycerate dehydrogenase 2 (3-PGDH 2) (EC 1.1.1.95)	6.5	0.4	140	376.406	Ambiguous			51.188		D.C.	1616
CAP_YEAST	Adenylyl cyclase-associated protein (CAP)	15	0.3	140	408.818	Ambiguous	Cytoplasm		57.521		D.C.	443
NEP1_YEAST	Ribosomal RNA small subunit methyltransferase NEP1 (EC 2.1.1.260) (18S rRNA (pseudouridine(1189)-N1)-methyltransferase) (18S rRNA Psi1189 methyltransferase) (Essential for mitotic growth protein 1) (Nucleolar essential protein 1)	910	1.2	130	106.74	Ambiguous	Nucleus		27.895		D.C.	2551
ARPC1_YEAST	Actin-related protein 2/3 complex subunit 1 (Arp2/3 complex 41 kDa subunit) (p41-ARC)	27	0.9	130	152.768	Ambiguous	Cytoplasm		42.475		D.C.	1241
RS10A_YEAST	40S ribosomal protein S10-A	170	0.8	130	168.396	Ambiguous	Cytoplasm		12.739		D.C.	1767
ARP3_YEAST	Actin-related protein 3 (Actin-like protein ARP3) (Actin-like protein 3)	4.8	0.4	130	328.202	Ambiguous	Cytoplasm		49.542		D.C.	1823
ILV6_YEAST	Acetolactate synthase small subunit, mitochondrial (Acetohydroxy-acid synthase small subunit) (AHAS) (ALS)	5.3	0.3	130	455.197	Ambiguous	Cytoplasm		33.987	MT	D.C.	671
ABP1_YEAST	Actin-binding protein	5.3	0.1	130	911.814	Ambiguous	Cytoplasm		65.576		D.C.	412
AROG_YEAST	Phospho-2-dehydro-3-deoxyheptonate aldolase, tyrosine-inhibited (EC 2.5.1.54) (3-deoxy-D-arabino-heptulosonate 7-phosphate synthase) (DAHP synthase) (Phospho-2-keto-3-deoxyheptonate aldolase)	0.9	0.1	130	1470.01	Ambiguous			39.749		D.C.	814
HSP60_YEAST	Heat shock protein 60, mitochondrial (CPN60) (P66) (Stimulator factor I 66 kDa component)	1.6	0.1	130	2236.62	Ambiguous	Cytoplasm		60.752	MT	D.C.	483
RL34B_YEAST	60S ribosomal protein L34-B	860	1.7	120	69.1749	Ambiguous	Cytoplasm		13.641		D.C.	1622
RIR1_YEAST	Ribonucleoside-diphosphate reductase large chain 1 (EC 1.17.4.1) (Ribonucleotide reductase R1 subunit 1) (Ribonucleotide reductase large subunit 1)	42	1	120	120.012	Ambiguous	Cytoplasm		99.561		D.C.	524
6PGD1_YEAST	6-phosphogluconate dehydrogenase, decarboxylating 1 (EC 1.1.1.44)	1.3	0	120	4714.27	Ambiguous	Cytoplasm		53.543		D.C.	1302
HXKB_YEAST	Hexokinase-2 (EC 2.7.1.1) (Hexokinase PII) (Hexokinase-B)	0.8	0	120	4302.44	Ambiguous		NESdb indoubt, BioGrid	53.942		D.C.	134
KGUA_YEAST	Guanylate kinase (EC 2.7.4.8) (GMP kinase)	4	0	120	3128.38	Ambiguous			20.637		D.C.	397
RBG2_YEAST	Ribosome-interacting GTPase 2 (GTP-binding protein RBG2)	780	0.8	110	137.506	Ambiguous	Cytoplasm		41.006		D.C.	2039
TCPE_YEAST	T-complex protein 1 subunit epsilon (TCP-1-epsilon) (CCT-epsilon)	44	0.7	110	156.692	Ambiguous	Cytoplasm		61.914		D.C.	1579
SC160_YEAST	Protein SCP160 (Protein HX)	2.8	0.2	110	599.46	Ambiguous	Both		134.81		D.C.	164
ARC1_YEAST	tRNA-aminoacylation cofactor ARC1 (Acyl-RNA-complex protein 1) (GU4 nucleic-binding protein 1) (G4p1 protein) (P42) (tRNA-interacting factor ARC1)	1	0.1	110	1052.42	Ambiguous	Both		42.084		D.C.	1757
PFKA2_YEAST	ATP-dependent 6-phosphofructokinase subunit beta (EC 2.7.1.11) (ATP-dependent 6-phosphofructokinase) (ATP-PFK) (Phosphofructokinase 2) (Phosphohexokinase)	2.1	0.1	110	2076.9	Ambiguous	Cytoplasm	BioGrid	104.618		D.C.	431
RPN10_YEAST	26S proteasome regulatory subunit RPN10	1.6	0.1	110	1766.67	Ambiguous			29.747		D.C.	1386
SYEC_YEAST	Glutamate--tRNA ligase, cytoplasmic (EC 6.1.1.17) (Glutamyl-tRNA synthetase) ((c)ERS) (GluRS) (P85)	1	0.1	110	1825.5	Ambiguous	Both		80.843		D.C.	1754
YHI0_YEAST	Putative proline--tRNA ligase YHR020W (EC 6.1.1.15) (Prolyl-tRNA synthetase) (ProRS)	1.2	0.1	110	1627.7	Ambiguous		BioGrid	77.386		D.C.	1294
PYR1_YEAST	Protein URA2 [Includes: Glutamine-dependent carbamoyl-phosphate synthase (EC 6.3.5.5); Aspartate carbamoyltransferase (EC 2.1.3.2)]	2.9	0	110	2418.34	Ambiguous	Cytoplasm	BioGrid	245.041		D.C.	208
CDC53_YEAST	Cell division control protein 53 (Cullin-A) (E3 ubiquitin ligase complex SCF subunit CDC53)	730	1.5	100	69.4137	Ambiguous	Both		93.944		D.C.	2762
G3P2_YEAST	Glyceraldehyde-3-phosphate dehydrogenase 2 (GAPDH 2) (EC 1.2.1.12)	3.7	0	100	4593.87	Ambiguous	Cytoplasm		35.847		D.C.	64
RUVB2_YEAST	RuvB-like protein 2 (RUVBL2) (EC 3.6.4.12) (TIP49-homology protein 2) (TIP49b homolog)	7.6	0.8	99	124.592	Ambiguous	Nucleus		51.612		D.C.	2922
RS21B_YEAST	40S ribosomal protein S21-B (S26) (YS25)	710	0.9	98	111.024	Ambiguous	Cytoplasm		9.76		D.C.	2960
FHP_YEAST	Flavohemoprotein (EC 1.14.12.17) (Flavohemoglobin) (Hemoglobin-like protein) (Nitric oxide dioxygenase) (NO oxygenase) (NOD)	1.4	0	97	2603.19	Ambiguous	Cytoplasm		44.646		D.C.	1446
GGA1_YEAST	ADP-ribosylation factor-binding protein GGA1 (Golgi-localized, gamma ear-containing, ARF-binding protein 1)	130	1.5	96	64.3201	Ambiguous	Cytoplasm		62.32		D.C.	2554
PIN4_YEAST	RNA-binding protein PIN4 (Psi inducibility protein 4)	13	0.7	96	147.969	Ambiguous	Cytoplasm		73.776		D.C.	991
PRS6B_YEAST	26S protease regulatory subunit 6B homolog (Protein YNT1) (Tat-binding homolog 2)	9.6	0.6	96	160.367	Ambiguous	Both		47.894		D.C.	945
PRS8_YEAST	26S protease regulatory subunit 8 homolog (Protein CIM3) (Protein SUG1) (Tat-binding protein TBY1)	7.2	0.9	93	110.282	Ambiguous	Both	BioGrid	45.272		D.C.	2234
VIP1_YEAST	Inositol hexakisphosphate and diphosphoinositol-pentakisphosphate kinase (EC 2.7.4.21) (EC 2.7.4.24) (InsP6 and PP-IP5 kinase)	260	1	87	83.2072	Ambiguous	Cytoplasm		129.755		D.C.	2607
SYP1_YEAST	Suppressor of yeast profilin deletion	620	1.7	85	49.4179	Ambiguous	Cytoplasm		96.137		D.C.	673
RSP5_YEAST	E3 ubiquitin-protein ligase RSP5 (EC 6.3.2.-) (Reverses SPT-phenotype protein 5)	31	1.5	84	54.1369	Ambiguous	Both	NESdb	91.816		D.C.	1476
RL28_YEAST	60S ribosomal protein L28 (L27a) (L29) (RP44) (RP62) (YL24)	610	0.7	84	124.202	Ambiguous	Cytoplasm		16.722		D.C.	105
EF1G2_YEAST	Elongation factor 1-gamma 2 (EF-1-gamma 2) (Eukaryotic elongation factor 1Bgamma 2) (eEF1Bgamma 2) (Translation elongation factor 1B gamma 2)	1.1	0	84	3202.27	Ambiguous	Cytoplasm		46.52		D.C.	1047
ARPC4_YEAST	Actin-related protein 2/3 complex subunit 4 (Arp2/3 complex 20 kDa) (p20-ARC)	26	0.2	83	441.316	Ambiguous	Cytoplasm		19.916		D.C.	943
CDC12_YEAST	Cell division control protein 12 (Septin)	10	0.5	82	177.525	Ambiguous	Cytoplasm		46.668		D.C.	824
LYS1_YEAST	Saccharopine dehydrogenase [NAD(+), L-lysine-forming] (SDH) (EC 1.5.1.7) (Lysine--2-oxoglutarate reductase)	1.2	0	82	2549.9	Ambiguous	Cytoplasm		41.465		D.C.	1416
LCF4_YEAST	Long-chain-fatty-acid--CoA ligase 4 (EC 6.2.1.3) (Fatty acid activator 4) (Long-chain acyl-CoA synthetase 4)	7.5	2	81	41.1284	Ambiguous			77.267		D.C.	1856
DNM1_YEAST	Dynamin-related protein DNM1 (EC 3.6.5.5)	580	1.3	81	60.5874	Ambiguous	Cytoplasm		84.972		D.C.	2176
SKP1_YEAST	Suppressor of kinetochore protein 1 (Centromere DNA-binding protein complex CBF3 subunit D) (E3 ubiquitin ligase complex SCF subunit SKP1)	580	0.5	81	159.907	Ambiguous	Both		22.33		D.C.	1925
TRPG_YEAST	Multifunctional tryptophan biosynthesis protein [Includes: Anthranilate synthase component 2 (AS) (EC 4.1.3.27) (Anthranilate synthase, glutamine amidotransferase component); Indole-3-glycerol phosphate synthase (EC 4.1.1.48) (PRAI)]	4.2	0.2	81	365.147	Ambiguous			53.489		D.C.	91
ILVB_YEAST	Acetolactate synthase catalytic subunit, mitochondrial (EC 2.2.1.6) (Acetohydroxy-acid synthase catalytic subunit) (AHAS) (ALS)	2.1	0.2	79	457.288	Ambiguous	Cytoplasm		74.937	MT	D.C.	227
SEC31_YEAST	Protein transport protein SEC31 (Protein WEB1)	6.5	0.2	78	347.302	Ambiguous	Cytoplasm		138.717		D.C.	1405
THRC_YEAST	Threonine synthase (TS) (EC 4.2.3.1)	1.3	0	78	4019.29	Ambiguous			57.474		D.C.	416
OLA1_YEAST	Obg-like ATPase 1	2	0.1	77	1252.24	Ambiguous	Cytoplasm		44.174		D.C.	1206
ALDH5_YEAST	Aldehyde dehydrogenase 5, mitochondrial (EC 1.2.1.5)	17	0.2	76	338.525	Ambiguous	Cytoplasm		56.693	MT	D.C.	1519
MET17_YEAST	Protein MET17 [Includes: O-acetylhomoserine sulfhydrylase (OAH sulfhydrylase) (EC 2.5.1.49) (Homocysteine synthase); O-acetylserine sulfhydrylase (OAS sulfhydrylase) (EC 2.5.1.47)]	1.1	0	76	5366.25	Ambiguous	Cytoplasm		48.672		D.C.	165
PP2A2_YEAST	Serine/threonine-protein phosphatase PP2A-2 catalytic subunit (EC 3.1.3.16)	30	1.6	74	46.1338	Ambiguous			43.047		D.C.	588
ARP8_YEAST	Actin-like protein ARP8	520	1.9	73	39.3096	Ambiguous	Both		100.209		D.C.	2891
EIF2A_YEAST	Eukaryotic translation initiation factor 2A (eIF-2A)	530	1.2	73	62.7307	Ambiguous			71.305		D.C.	2014
P5CR_YEAST	Pyrroline-5-carboxylate reductase (P5C reductase) (P5CR) (EC 1.5.1.2)	0.3	0.2	73	472.191	Ambiguous			30.132		D.C.	780
BUD23_YEAST	18S rRNA (guanine(1575)-N(7))-methyltransferase (EC 2.1.1.-) (Bud site selection protein 23)	510	1.5	71	48.3349	Ambiguous	Both		30.742		D.C.	674
RPP1_YEAST	Ribonuclease P/MRP protein subunit RPP1 (EC 3.1.26.5) (RNA-processing protein RPP1) (RNaseP/MRP 32.2 kDa subunit)	170	1.4	71	52.4196	Ambiguous	Nucleus		32.224		D.C.	1330
NMT_YEAST	Glycylpeptide N-tetradecanoyltransferase (EC 2.3.1.97) (Cell division control protein 72) (Myristoyl-CoA:protein N-myristoyltransferase) (NMT) (Peptide N-myristoyltransferase)	23	0.6	71	124.288	Ambiguous	Cytoplasm		52.838		D.C.	381
SNO1_YEAST	Probable glutamine amidotransferase SNO1 (EC 2.6.-.-)	7.9	0.4	71	179.546	Ambiguous			24.907		D.C.	2298
LSM7_YEAST	U6 snRNA-associated Sm-like protein LSm7	510	0.2	71	291.28	Ambiguous	Both		13.006		D.C.	2132
VATD_YEAST	V-type proton ATPase subunit D (V-ATPase subunit D) (Vacuolar proton pump subunit D)	3	0.2	71	433.358	Ambiguous			29.194		D.C.	880
PUF6_YEAST	Pumilio homology domain family member 6	510	1.5	70	47.834	Ambiguous	Nucleus		75.106		D.C.	2425
SQT1_YEAST	Ribosome assembly protein SQT1	18	1.2	70	56.5409	Ambiguous			47.167		D.C.	1017
ATPB_YEAST	ATP synthase subunit beta, mitochondrial (EC 3.6.3.14)	3.1	0.2	70	403.091	Ambiguous	Cytoplasm		54.794	MT	D.C.	82
PPID_YEAST	Peptidyl-prolyl cis-trans isomerase CPR6 (PPIase CPR6) (EC 5.2.1.8) (Rotamase CPR6)	1.1	0.1	70	606.037	Ambiguous	Cytoplasm		42.072		D.C.	2076
PUR2_YEAST	Bifunctional purine biosynthetic protein ADE5,7 [Includes: Phosphoribosylamine--glycine ligase (EC 6.3.4.13) (Glycinamide ribonucleotide synthetase) (GARS) (Phosphoribosylglycinamide synthetase); Phosphoribosylformylglycinamidine cyclo-ligase (EC 6.3.3.1) (AIR synthase) (AIRS) (Phosphoribosyl-aminoimidazole synthetase)]	2.1	0	70	3033.5	Ambiguous			86.068		D.C.	200
PRS4_YEAST	26S protease regulatory subunit 4 homolog (Tat-binding homolog 5)	4.5	0.4	69	193.934	Ambiguous	Both		48.828		D.C.	1562
KPR1_YEAST	Ribose-phosphate pyrophosphokinase 1 (EC 2.7.6.1) (Phosphoribosyl pyrophosphate synthase 1)	17	0.7	68	103.986	Ambiguous	Cytoplasm		47.047		D.C.	924
EDE1_YEAST	EH domain-containing and endocytosis protein 1 (Bud site selection protein 15)	38	0.4	68	170.043	Ambiguous	Cytoplasm		150.783		D.C.	990
DHAS_YEAST	Aspartate-semialdehyde dehydrogenase (ASA dehydrogenase) (ASADH) (EC 1.2.1.11) (Aspartate-beta-semialdehyde dehydrogenase)	2.8	0	68	2819.17	Ambiguous			39.544		D.C.	365
DLD3_YEAST	D-lactate dehydrogenase [cytochrome] 3 (EC 1.1.2.4) (D-lactate ferricytochrome C oxidoreductase) (D-LCR)	0.7	0	68	2884.4	Ambiguous	Cytoplasm		55.225		D.C.	1486
RPA2_YEAST	DNA-directed RNA polymerase I subunit RPA135 (EC 2.7.7.6) (DNA-directed RNA polymerase I 135 kDa polypeptide) (A135) (DNA-directed RNA polymerase I polypeptide 2) (RNA polymerase I subunit 2)	120	1.6	67	43.4068	Ambiguous	Nucleus		135.742		D.C.	540
2ABA_YEAST	Protein phosphatase PP2A regulatory subunit B (Cell division control protein 55) (PR55)	98	1.4	67	49.7035	Ambiguous			59.662		D.C.	2200
DRE2_YEAST	Fe-S cluster assembly protein DRE2 (Anamorsin homolog)	10	1.2	66	57.3469	Ambiguous	Cytoplasm		38.543		D.C.	1106
PHO84_YEAST	Inorganic phosphate transporter PHO84	4.9	6.5	65	9.97799	Ambiguous	Cytoplasm		64.382	TM	D.C.	618
NOP6_YEAST	Nucleolar protein 6	470	0.5	65	126.137	Ambiguous	Nucleus		25.216		D.C.	2646
SEC4_YEAST	Ras-related protein SEC4 (Suppressor of RHO3 protein 6)	1.9	0.5	65	131.864	Ambiguous	Cytoplasm		23.506		D.C.	229
2AAA_YEAST	Protein phosphatase PP2A regulatory subunit A (PR65)	470	0.4	65	175.278	Ambiguous			70.907		D.C.	767
RL26A_YEAST	60S ribosomal protein L26-A (L33) (YL33)	450	1.3	63	49.8447	Ambiguous	Cytoplasm		14.234		D.C.	150
RPN1_YEAST	26S proteasome regulatory subunit RPN1 (HMG-CoA reductase degradation protein 2) (Proteasome non-ATPase subunit 1)	3.6	0.1	63	780.886	Ambiguous			109.492		D.C.	1319
YM94_YEAST	Uncharacterized protein YMR315W	1.7	0.1	63	532.248	Ambiguous			38.216		D.C.	2467
PSA4_YEAST	Proteasome subunit alpha type-4 (EC 3.4.25.1) (Macropain subunit PRE6) (Multicatalytic endopeptidase complex subunit PRE6) (Proteasome component PRE6) (Proteinase YSCE subunit PRE6)	4.9	0.1	62	589.09	Ambiguous	Both		28.439		D.C.	1560
GLNA_YEAST	Glutamine synthetase (GS) (EC 6.3.1.2) (Glutamate--ammonia ligase)	2.4	0	62	1274.01	Ambiguous	Cytoplasm		41.766		D.C.	783
PRS7_YEAST	26S protease regulatory subunit 7 homolog (Protein CIM5) (Tat-binding homolog 3)	9.3	0.4	61	139.511	Ambiguous	Both	BioGrid	51.983		D.C.	946
QCR2_YEAST	Cytochrome b-c1 complex subunit 2, mitochondrial (Complex III subunit 2) (Core protein II) (Ubiquinol-cytochrome-c reductase complex core protein 2)	100	0.3	61	202.205	Ambiguous	Cytoplasm		40.478	MT	D.C.	206
LEU1_YEAST	2-isopropylmalate synthase (EC 2.3.3.13) (Alpha-IPM synthase) (Alpha-isopropylmalate synthase)	0.5	0.1	61	1075.59	Ambiguous	Cytoplasm		68.409		D.C.	169
RAD25_YEAST	DNA repair helicase RAD25 (EC 3.6.4.12) (General transcription and DNA repair factor IIH subunit RAD25) (TFIIH subunit RAD25) (Suppressor of stem-loop mutation 2)	2.4	6	60	10.0982	Ambiguous	Nucleus		95.341		D.C.	2205
ARO1_YEAST	Pentafunctional AROM polypeptide [Includes: 3-dehydroquinate synthase (DHQS) (EC 4.2.3.4); 3-phosphoshikimate 1-carboxyvinyltransferase (EC 2.5.1.19) (5-enolpyruvylshikimate-3-phosphate synthase) (EPSP synthase) (EPSPS); Shikimate kinase (SK) (EC 2.7.1.71); 3-dehydroquinate dehydratase (3-dehydroquinase) (EC 4.2.1.10); Shikimate dehydrogenase (EC 1.1.1.25)]	3.2	0	60	1369.75	Ambiguous	Cytoplasm		174.755		D.C.	247
RPAB4_YEAST	DNA-directed RNA polymerases I, II, and III subunit RPABC4 (RNA polymerases I, II, and III subunit ABC4) (ABC10-alpha)	420	0.8	59	73.1956	Ambiguous	Nucleus		7.716		D.C.	1581
COFI_YEAST	Cofilin (Actin-depolymerizing factor 1)	1.5	0	58	3497.29	Ambiguous	Both		15.901		D.C.	2292
SUB2_YEAST	ATP-dependent RNA helicase SUB2 (EC 3.6.4.13) (Suppressor of BRR1 protein 2)	1.5	0	58	1377.24	Ambiguous	Nucleus		50.309		D.C.	2636
PMM_YEAST	Phosphomannomutase (PMM) (EC 5.4.2.8)	6.6	0	57	3473.65	Ambiguous	Cytoplasm		29.063		D.C.	223
CORO_YEAST	Coronin-like protein	130	0.3	56	226.76	Ambiguous			72.553		D.C.	2570
CBS_YEAST	Cystathionine beta-synthase (EC 4.2.1.22) (Beta-thionase) (Serine sulfhydrase) (Sulfur transfer protein 4)	1	0	55	1927.33	Ambiguous			56.022		D.C.	865
ALDH6_YEAST	Magnesium-activated aldehyde dehydrogenase, cytosolic (EC 1.2.1.4) (Mg(2+)-activated acetaldehyde dehydrogenase) (Mg(2+)-ACDH)	0.9	0	54	4534.42	Ambiguous	Cytoplasm		54.414		D.C.	2165
UPP_YEAST	Uracil phosphoribosyltransferase (UPRTase) (EC 2.4.2.9) (UMP pyrophosphorylase)	3.4	0	53	2097.34	Ambiguous			24.594		D.C.	456
SRY1_YEAST	Threo-3-hydroxyaspartate ammonia-lyase (EC 4.3.1.16) (L-threo-3-hydroxyaspartate dehydratase)	4.6	1.8	52	28.7886	Ambiguous			34.899		D.C.	1046
RL38_YEAST	60S ribosomal protein L38	380	0.7	52	80.7103	Ambiguous	Cytoplasm		8.827		D.C.	1886
ART10_YEAST	Arrestin-related trafficking adapter 10	370	0.5	52	106.646	Ambiguous	Cytoplasm		59.758		D.C.	457
MCK1_YEAST	Protein kinase MCK1 (EC 2.7.12.1) (Meiosis and centromere regulatory kinase)	2.8	0.4	52	123.188	Ambiguous			43.136		D.C.	532
SUI1_YEAST	Eukaryotic translation initiation factor eIF-1 (Protein translation factor SUI1)	370	0.2	52	240.305	Ambiguous			12.312		D.C.	934
IDH1_YEAST	Isocitrate dehydrogenase [NAD] subunit 1, mitochondrial (EC 1.1.1.41) (Isocitric dehydrogenase) (NAD(+)-specific ICDH)	3.7	0.1	52	873.894	Ambiguous	Cytoplasm		39.324	MT	D.C.	736
YFD4_YEAST	Uncharacterized membrane protein YFL034W	0.9	11	51	4.53005	Ambiguous	Cytoplasm		119.51	TM	D.C.	1718
AHA1_YEAST	Hsp90 co-chaperone AHA1 (Activator of Hsp90 ATPase protein 1)	1.3	0.2	51	214.486	Ambiguous	Cytoplasm		39.436		D.C.	2913
MBF1_YEAST	Multiprotein-bridging factor 1 (Suppressor of frameshift mutations protein 13)	30	0.2	51	249.075	Ambiguous	Both		16.404		D.C.	59
TBP_YEAST	TATA-box-binding protein (TATA sequence-binding protein) (TBP) (TATA-binding factor) (TATA-box factor) (Transcription factor D) (Transcription initiation factor TFIID TBP subunit)	360	1.6	50	31.6685	Ambiguous	Nucleus		27.003		D.C.	361
MED20_YEAST	Mediator of RNA polymerase II transcription subunit 20 (Hyper-recombination suppressor protein 2) (Mediator complex subunit 20) (Suppressor of RNA polymerase B 2)	360	0.5	50	109.986	Ambiguous	Nucleus		22.894		D.C.	986
ODPB_YEAST	Pyruvate dehydrogenase E1 component subunit beta, mitochondrial (EC 1.2.4.1) (Pyruvate dehydrogenase complex component E1 beta) (PDHE1-B)	7.1	0.4	50	128.892	Ambiguous	Cytoplasm		40.054	MT	D.C.	828
YP225_YEAST	Protein PBDC1 homolog	10	0	50	1273.39	Ambiguous	Cytoplasm		17.445		D.C.	2749
RPN8_YEAST	26S proteasome regulatory subunit RPN8	8.8	0.2	49	289.173	Ambiguous			38.313		D.C.	2720
RCC1_YEAST	Guanine nucleotide exchange factor SRM1 (Pheromone response pathway component SRM1) (Pre-mRNA-processing protein 20) (Regulator of chromosome condensation) (Suppressor of receptor mutations 1) (mRNA transport protein 1)	350	0.7	48	68.9853	Ambiguous	Nucleus	BioGrid	53.014		D.C.	529
SCH9_YEAST	Serine/threonine-protein kinase SCH9 (EC 2.7.11.1)	36	0.4	48	119.56	Ambiguous			91.812		D.C.	335
CRP1_YEAST	Cruciform DNA-recognizing protein 1 [Cleaved into: CRP1 short N-terminal subpeptide; CRP1 short C-terminal subpeptide]	92	0.3	48	186.015	Ambiguous			51.116		D.C.	1366
ENO1_YEAST	Enolase 1 (EC 4.2.1.11) (2-phospho-D-glycerate hydro-lyase 1) (2-phosphoglycerate dehydratase 1)	1.5	0	48	3340.22	Ambiguous	Cytoplasm		46.816		D.C.	87
CDK1_YEAST	Cyclin-dependent kinase 1 (CDK1) (EC 2.7.11.22) (Cell division control protein 28) (Cell division protein kinase 1)	28	0.3	47	150.458	Ambiguous			34.061		D.C.	72
PRS6A_YEAST	26S protease regulatory subunit 6A (Tat-binding protein homolog 1) (TBP-1)	2.8	0.3	47	189.877	Ambiguous	Both		48.256		D.C.	944
HEMH_YEAST	Ferrochelatase, mitochondrial (EC 4.99.1.1) (Heme synthase) (Protoheme ferro-lyase)	2.2	16	45	2.8226	Ambiguous	Cytoplasm		44.596	MT	D.C.	427
RSMB_YEAST	Small nuclear ribonucleoprotein-associated protein B (snRNP-B) (Sm protein B) (Sm-B) (SmB)	320	1.7	45	27.1321	Ambiguous	Nucleus		22.379		D.C.	1506
GAR1_YEAST	H/ACA ribonucleoprotein complex subunit 1 (snoRNP protein GAR1)	320	1.5	45	29.0804	Ambiguous	Nucleus		21.48		D.C.	721
MTC1_YEAST	Maintenance of telomere capping protein 1	160	0.5	45	86.5389	Ambiguous	Cytoplasm		53.477		D.C.	1786
RL31A_YEAST	60S ribosomal protein L31-A (L34) (YL28)	330	0.3	45	184.072	Ambiguous	Cytoplasm		12.953		D.C.	274
FUMH_YEAST	Fumarate hydratase, mitochondrial (Fumarase) (EC 4.2.1.2)	9.1	0.2	45	190.626	Ambiguous	Cytoplasm		53.152	MT	D.C.	240
SAHH_YEAST	Adenosylhomocysteinase (AdoHcyase) (EC 3.3.1.1) (S-adenosyl-L-homocysteine hydrolase)	0.9	0	45	4061.89	Ambiguous			49.126		D.C.	1477
CLU_YEAST	Clustered mitochondria protein 1 (Translation initiation factor 31) (eIF3-associated protein p135)	130	0.6	44	75.4724	Ambiguous	Cytoplasm		145.166		D.C.	2347
TKT2_YEAST	Transketolase 2 (TK 2) (EC 2.2.1.1)	27	0.3	44	163.051	Ambiguous			75.029		D.C.	952
CYS3_YEAST	Cystathionine gamma-lyase (EC 4.4.1.1) (Gamma-cystathionase) (Sulfur transfer protein 1)	1.6	0	44	2388.07	Ambiguous	Cytoplasm		42.542		D.C.	764
FKBP_YEAST	FK506-binding protein 1 (FKBP) (Peptidyl-prolyl cis-trans isomerase) (PPIase) (EC 5.2.1.8) (Rapamycin-binding protein)	10	0	44	1622.4	Ambiguous	Cytoplasm		12.158		D.C.	490
SYIC_YEAST	Isoleucine--tRNA ligase, cytoplasmic (EC 6.1.1.5) (Isoleucyl-tRNA synthetase) (IleRS)	0.9	0	44	1521.36	Ambiguous	Cytoplasm		122.984		D.C.	256
SYSC_YEAST	Serine--tRNA ligase, cytoplasmic (EC 6.1.1.11) (Seryl-tRNA synthetase) (SerRS) (Seryl-tRNA(Ser/Sec) synthetase)	1.1	0	44	1591.34	Ambiguous	Cytoplasm		53.31		D.C.	224
RL22A_YEAST	60S ribosomal protein L22-A (L1c) (RP4) (YL31)	310	0.8	43	52.9993	Ambiguous	Cytoplasm		13.693		D.C.	153
AIM17_YEAST	Probable oxidoreductase AIM17 (EC 1.14.11.-) (Altered inheritance of mitochondria protein 17, mitochondrial) (Found in mitochondrial proteome protein 12)	12	0.2	43	236.903	Ambiguous	Cytoplasm		53.135	MT	D.C.	570
AROC_YEAST	Chorismate synthase (EC 4.2.3.5) (5-enolpyruvylshikimate-3-phosphate phospholyase)	1	0.1	43	311.535	Ambiguous			40.838		D.C.	733
RRP12_YEAST	Ribosomal RNA-processing protein 12	300	1.8	42	24.1686	Ambiguous	Both		137.509		D.C.	2956
PESC_YEAST	Pescadillo homolog (Nucleolar protein 7) (Ribosomal RNA-processing protein 13)	290	1.4	41	29.6882	Ambiguous	Nucleus		69.877		D.C.	2027
RPN9_YEAST	26S proteasome regulatory subunit RPN9 (Proteasome non-ATPase subunit 7)	0.4	0.2	41	194.004	Ambiguous			45.782		D.C.	2387
YKT6_YEAST	Synaptobrevin homolog YKT6 (EC 2.3.1.-)	2.1	0.1	41	626.02	Ambiguous	Cytoplasm		22.707		D.C.	1050
CISY1_YEAST	Citrate synthase, mitochondrial (EC 2.3.3.16)	24	0.1	40	355.792	Ambiguous	Cytoplasm		53.36	MT	D.C.	83
LSM3_YEAST	U6 snRNA-associated Sm-like protein LSm3 (SmX4 protein)	280	1.2	39	31.8948	Ambiguous	Both		10.03		D.C.	2182
EFTU_YEAST	Elongation factor Tu, mitochondrial (tufM)	2.2	0.2	39	210.421	Ambiguous	Cytoplasm		47.972	MT	D.C.	112
ACON2_YEAST	Homocitrate dehydratase, mitochondrial (EC 4.2.1.-) (Aconitase 2)	1.2	0	39	1274.79	Ambiguous	Cytoplasm		86.583	MT	D.C.	1444
MAM33_YEAST	Mitochondrial acidic protein MAM33	270	0.4	38	87.3191	Ambiguous	Cytoplasm		30.132	MT	D.C.	1617
YKR18_YEAST	Mitochondrial outer membrane protein YKR018C	280	0.2	38	198.616	Ambiguous	Cytoplasm		81.754	TM	D.C.	1087
HIS1_YEAST	ATP phosphoribosyltransferase (ATP-PRT) (ATP-PRTase) (EC 2.4.2.17)	9.4	0	38	2204.79	Ambiguous	Cytoplasm		32.266		D.C.	71
TRS31_YEAST	Trafficking protein particle complex subunit 31 (TRAPP subunit 31) (Transport protein particle 31 kDa subunit)	270	1.8	37	20.3321	Ambiguous	Cytoplasm		31.722		D.C.	2320
RPC2_YEAST	DNA-directed RNA polymerase III subunit RPC2 (RNA polymerase III subunit C2) (EC 2.7.7.6) (C128) (DNA-directed RNA polymerase III 130 kDa polypeptide)	79	0.9	37	40.473	Ambiguous	Nucleus		129.456		D.C.	555
HIS2_YEAST	Histidine biosynthesis trifunctional protein [Includes: Phosphoribosyl-AMP cyclohydrolase (EC 3.5.4.19); Phosphoribosyl-ATP pyrophosphohydrolase (EC 3.6.1.31); Histidinol dehydrogenase (HDH) (EC 1.1.1.23)]	1.3	0	37	2730.37	Ambiguous			87.721		D.C.	80
SYTC_YEAST	Threonine--tRNA ligase, cytoplasmic (EC 6.1.1.3) (Threonyl-tRNA synthetase) (ThrRS)	5	0	37	1307.95	Ambiguous	Cytoplasm		84.52		D.C.	130
SMD1_YEAST	Small nuclear ribonucleoprotein Sm D1 (Sm-D1) (snRNP core protein D1)	260	1.5	36	23.7598	Ambiguous	Nucleus		16.275		D.C.	2244
RS30B_YEAST	40S ribosomal protein S30-B	260	0.8	36	44.1784	Ambiguous	Cytoplasm		7.118		D.C.	289
PDI_YEAST	Protein disulfide-isomerase (PDI) (EC 5.3.4.1) (Thioredoxin-related glycoprotein 1)	260	0.3	36	140.315	Ambiguous	Cytoplasm		58.227	ER	D.C.	451
KHSE_YEAST	Homoserine kinase (HK) (HSK) (EC 2.7.1.39)	1.1	0	36	1641.13	Ambiguous			38.712		D.C.	439
SYG_YEAST	Glycine--tRNA ligase 1, mitochondrial (EC 6.1.1.14) (Diadenosine tetraphosphate synthetase) (AP-4-A synthetase) (Glycyl-tRNA synthetase 1) (GlyRS 1) (GlyRS1)	0.5	0	36	2049.83	Ambiguous	Cytoplasm		78.184	MT	D.C.	1160
SYMC_YEAST	Methionine--tRNA ligase, cytoplasmic (EC 6.1.1.10) (Methionyl-tRNA synthetase) (MetRS)	1.5	0	36	847.599	Ambiguous	Both		85.678		D.C.	94
RPC4_YEAST	DNA-directed RNA polymerase III subunit RPC4 (RNA polymerase III subunit C4) (C53) (DNA-directed RNA polymerase III 47 kDa polypeptide)	250	1.4	35	24.7616	Ambiguous	Nucleus		46.667		D.C.	653
HMT1_YEAST	Protein arginine N-methyltransferase 1 (EC 2.1.1.-) (Major type I protein arginine N-methyltransferase) (Type I PRMT) (hnRNP arginine N-methyltransferase)	260	0.8	35	43.7181	Ambiguous	Nucleus		39.786		D.C.	1152
SYRC_YEAST	Arginine--tRNA ligase, cytoplasmic (EC 6.1.1.19) (Arginyl-tRNA synthetase) (ArgRS)	2.1	0	35	1366.24	Ambiguous	Cytoplasm		69.525		D.C.	2485
RNZ_YEAST	Ribonuclease Z (RNase Z) (EC 3.1.26.11) (tRNA 3 endonuclease) (tRNase Z)	1.1	5.5	34	6.07481	Ambiguous	Both		96.816		D.C.	1110
EF1B_YEAST	Elongation factor 1-beta (EF-1-beta) (Eukaryotic elongation factor 1Balpha) (eEF1Balpha) (Translation elongation factor 1B alpha)	1.2	0	34	1630.28	Ambiguous			22.627		D.C.	826
BRE1_YEAST	E3 ubiquitin-protein ligase BRE1 (EC 6.3.2.-) (Brefeldin A-sensitivity protein 1)	240	1.7	33	19.4847	Ambiguous	Nucleus		80.692		D.C.	2634
TAF14_YEAST	Transcription initiation factor TFIID subunit 14 (Actin non-complementing mutant 1) (Chromosome stability protein 10) (SWI/SNF chromatin-remodeling complex subunit TAF14) (SWI/SNF complex 29 kDa subunit) (SWI/SNF complex subunit TAF14) (TBP-associated factor 14) (TBP-associated factor 30 kDa) (Transcription factor G 30 kDa subunit) (Transcription initiation factor TFIIF 30 kDa subunit)	230	0.4	33	93.6783	Ambiguous	Nucleus		27.44		D.C.	1018
LHP1_YEAST	La protein homolog (La autoantigen homolog) (La ribonucleoprotein)	13	0.2	33	168.459	Ambiguous	Nucleus		32.104		D.C.	963
APA1_YEAST	Protein APA1 [Includes: 5',5'''-P-1,P-4-tetraphosphate phosphorylase (EC 2.7.7.53) (ATP adenylyltransferase) (Diadenosine 5',5'''-P1,P4-tetraphosphate phosphorylase) (AP,A phosphorylase) (AP-4-A phosphorylase); ADP-sulfurylase (EC 2.7.7.5)]	2.9	0.1	33	470.287	Ambiguous			36.493		D.C.	425
PSA5_YEAST	Proteasome subunit alpha type-5 (EC 3.4.25.1) (Macropain subunit PUP2) (Multicatalytic endopeptidase complex subunit PUP2) (Proteasome component PUP2) (Proteinase YSCE subunit PUP2)	8.3	0.1	33	396.662	Ambiguous	Both		28.617		D.C.	805
PSA6_YEAST	Proteasome subunit alpha type-6 (EC 3.4.25.1) (Macropain subunit PRE5) (Multicatalytic endopeptidase complex subunit PRE5) (Proteasome component PRE5) (Proteinase YSCE subunit PRE5)	31	0.1	33	581.951	Ambiguous	Both		25.604		D.C.	1559
RPN2_YEAST	26S proteasome regulatory subunit RPN2	25	0.1	33	246.937	Ambiguous			104.232		D.C.	857
BCA2_YEAST	Branched-chain-amino-acid aminotransferase, cytosolic (BCAT) (EC 2.6.1.42) (Protein TWT2)	1.4	0	33	1085.27	Ambiguous	Cytoplasm		41.625		D.C.	1854
YPT1_YEAST	GTP-binding protein YPT1 (Protein YP2) (Rab GTPase YPT1) (Transport GTPase YPT1)	5.3	0.2	32	188.784	Ambiguous	Cytoplasm		23.214		D.C.	99
TPS1_YEAST	Alpha,alpha-trehalose-phosphate synthase [UDP-forming] 56 kDa subunit (EC 2.4.1.15) (General glucose sensor subunit 1) (Glycogen metabolism control protein GLC6) (Trehalose synthase complex catalytic subunit TPS1) (Trehalose-6-phosphate synthase) (UDP-glucose-glucosephosphate glucosyltransferase)	1.3	0.1	32	391.801	Ambiguous	Cytoplasm		56.148		D.C.	2209
HS104_YEAST	Heat shock protein 104 (Protein aggregation-remodeling factor HSP104)	1.4	0	32	964.482	Ambiguous	Both		102.035		D.C.	771
LSM2_YEAST	U6 snRNA-associated Sm-like protein LSm2 (Small nuclear ribonucleoprotein D homolog SNP3)	220	0.9	31	35.4988	Ambiguous	Both		11.163		D.C.	1200
NFS1_YEAST	Cysteine desulfurase, mitochondrial (EC 2.8.1.7) (tRNA-splicing protein SPL1)	73	0.5	31	67.3507	Ambiguous	Cytoplasm		54.467	MT	D.C.	645
NAB3_YEAST	Nuclear polyadenylated RNA-binding protein 3	11	0.4	31	82.224	Ambiguous	Nucleus		90.439		D.C.	1415
URA7_YEAST	CTP synthase 1 (EC 6.3.4.2) (CTP synthetase 1) (UTP--ammonia ligase 1)	220	0.2	31	187.645	Ambiguous			64.71		D.C.	727
RIR4_YEAST	Ribonucleoside-diphosphate reductase small chain 2 (EC 1.17.4.1) (Ribonucleotide reductase R2 subunit 2) (Ribonucleotide reductase small subunit 2)	1.2	0	31	877.561	Ambiguous	Both		40.055		D.C.	1893
BET3_YEAST	Trafficking protein particle complex subunit BET3 (TRAPP subunit BET3) (Transport protein particle 22 kDa subunit)	220	1.9	30	16.1584	Ambiguous	Cytoplasm		22.129		D.C.	1104
SSU72_YEAST	RNA polymerase II subunit A C-terminal domain phosphatase SSU72 (CTD phosphatase SSU72) (EC 3.1.3.16) (Suppressor of SUA7 protein 2)	210	1.4	30	20.5935	Ambiguous	Nucleus		23.469		D.C.	2057
CDC10_YEAST	Cell division control protein 10	12	0.3	30	117.312	Ambiguous	Cytoplasm		37.025		D.C.	629
RPN7_YEAST	26S proteasome regulatory subunit RPN7	4.5	0.3	30	115.198	Ambiguous			48.959		D.C.	2524
SEC14_YEAST	SEC14 cytosolic factor (Phosphatidylinositol/phosphatidylcholine transfer protein) (PI/PC TP)	0.8	0.1	30	435.527	Ambiguous	Cytoplasm		34.901		D.C.	600
IDHP_YEAST	Isocitrate dehydrogenase [NADP], mitochondrial (IDH) (EC 1.1.1.42) (IDP) (NADP(+)-specific ICDH) (Oxalosuccinate decarboxylase)	10	0	30	656.403	Ambiguous	Cytoplasm		48.19	MT	D.C.	531
SP105_YEAST	Spindle pole body component SPC105 (105 kDa spindle pole component protein)	1.3	9.9	29	2.95017	Ambiguous	Both		104.826		D.C.	1987
MDG1_YEAST	Signal transduction protein MDG1 (Multicopy suppressor of defective G-protein 1)	14	1.4	29	20.9571	Ambiguous	Cytoplasm		40.278		D.C.	2120
GCN1_YEAST	Translational activator GCN1	230	0.1	29	341.224	Ambiguous		BioGrid	296.698		D.C.	977
KES1_YEAST	Protein KES1 (Oxysterol-binding protein homolog 4)	1.1	0.1	29	304.419	Ambiguous			49.492		D.C.	1037
SNZ1_YEAST	Pyridoxine biosynthesis protein SNZ1 (PDX1 homolog 1) (p35)	1.2	0	29	1145.35	Ambiguous			31.817		D.C.	2299
GIN4_YEAST	Serine/threonine-protein kinase GIN4 (EC 2.7.11.1) (Growth inhibitory protein 4)	200	1.6	28	18.0139	Ambiguous	Cytoplasm		129.858		D.C.	2846
NOP15_YEAST	Ribosome biogenesis protein 15 (Nucleolar protein 15)	8.8	0.6	28	47.8324	Ambiguous	Both		25.447		D.C.	2140
RPC3_YEAST	DNA-directed RNA polymerase III subunit RPC3 (RNA polymerase III subunit C3) (C82) (DNA-directed III 74 kDa polypeptide) (C74)	200	0.4	28	66.9129	Ambiguous	Both		74.017		D.C.	797
ARPC3_YEAST	Actin-related protein 2/3 complex subunit 3 (Arp2/3 complex 21 kDa subunit) (p21-ARC)	11	0.1	28	277.688	Ambiguous	Cytoplasm		20.579		D.C.	2510
IWS1_YEAST	Transcription factor SPN1 (Interacts with SPT6 protein 1) (Suppresses postrecruitment functions protein 1)	24	0.5	27	57.6434	Ambiguous	Nucleus		46.082		D.C.	2577
RAD23_YEAST	UV excision repair protein RAD23	4.4	0.2	27	182.597	Ambiguous	Both		42.367		D.C.	886
SYH_YEAST	Histidine--tRNA ligase, mitochondrial (EC 6.1.1.21) (Histidyl-tRNA synthetase) (HisRS)	2.3	0.1	27	533.504	Ambiguous	Cytoplasm		59.953	MT	D.C.	211
TRXB1_YEAST	Thioredoxin reductase 1 (EC 1.8.1.9)	0.8	0	27	2047.33	Ambiguous	Cytoplasm		34.238		D.C.	748
MCM2_YEAST	DNA replication licensing factor MCM2 (EC 3.6.4.12) (Minichromosome maintenance protein 2)	190	1	26	27.3997	Ambiguous	Nucleus		98.78		D.C.	745
HBS1_YEAST	Elongation factor 1 alpha-like protein	14	0.3	26	79.6726	Ambiguous	Cytoplasm		68.73		D.C.	894
SAR1_YEAST	Small COPII coat GTPase SAR1 (EC 3.6.5.-) (GTP-binding protein SAR1) (Secretion-associated RAS-related protein 1)	26	0.2	26	136.452	Ambiguous	Cytoplasm		21.451		D.C.	508
ACON_YEAST	Aconitate hydratase, mitochondrial (Aconitase) (EC 4.2.1.3) (Citrate hydro-lyase)	1.8	0	26	1828.47	Ambiguous	Cytoplasm		85.368	MT	D.C.	472
HSP82_YEAST	ATP-dependent molecular chaperone HSP82 (82 kDa heat shock protein) (Heat shock protein Hsp90 heat-inducible isoform)	1	0	26	659.431	Ambiguous	Cytoplasm		81.406		D.C.	111
SST2_YEAST	Protein SST2	180	1.9	25	12.8899	Ambiguous			79.716		D.C.	338
DET1_YEAST	Broad-range acid phosphatase DET1 (EC 3.1.3.-) (Decreased ergosterol transport protein 1)	180	1.7	25	14.4965	Ambiguous	Both		39.172		D.C.	2987
RL33B_YEAST	60S ribosomal protein L33-B (L37) (RP47) (YL37)	180	1.7	25	14.6955	Ambiguous	Cytoplasm		12.168		D.C.	1659
CHD1_YEAST	Chromo domain-containing protein 1 (EC 3.6.4.-) (ATP-dependent helicase CHD1)	27	0.9	25	26.8496	Ambiguous	Nucleus		168.241		D.C.	893
ETR1_YEAST	Enoyl-[acyl-carrier protein] reductase [NADPH, B-specific], mitochondrial (EC 1.3.1.10) (Mitochondrial respiratory function protein 1) (Trans-2-enoyl-CoA reductase) (EC 1.3.1.38)	180	0.7	25	35.9927	Ambiguous	Cytoplasm		42.067	MT	D.C.	1151
OAT_YEAST	Ornithine aminotransferase (EC 2.6.1.13) (Ornithine--oxo-acid aminotransferase)	3.7	0.1	25	352.803	Ambiguous	Cytoplasm		46.086		D.C.	236
WTM1_YEAST	Transcriptional modulator WTM1	0.6	0	25	1055.07	Ambiguous	Both		48.383		D.C.	2884
YGZ2_YEAST	Ankyrin repeat-containing protein YGL242C	170	0.7	24	35.8031	Ambiguous			20.074		D.C.	1950
YG3A_YEAST	Uncharacterized protein YGR130C	9	0.6	24	39.1208	Ambiguous			92.698		D.C.	2036
RPN6_YEAST	26S proteasome regulatory subunit RPN6 (Proteasome non-ATPase subunit 4)	13	0.2	24	139.69	Ambiguous			49.774		D.C.	2887
PPX1_YEAST	Exopolyphosphatase (ExopolyPase) (EC 3.6.1.11) (Metaphosphatase)	20	0.1	24	245.9	Ambiguous			45.051		D.C.	1289
RPN12_YEAST	26S proteasome regulatory subunit RPN12 (Nuclear integrity protein 1)	53	0.1	24	232.534	Ambiguous			31.919		D.C.	841
GCSH_YEAST	Glycine cleavage system H protein, mitochondrial (Glycine decarboxylase complex subunit H)	7.6	0	24	833.398	Ambiguous	Cytoplasm		18.793	MT	D.C.	1461
TAH1_YEAST	TPR repeat-containing protein associated with Hsp90	170	1.6	23	14.9537	Ambiguous	Both		12.511		D.C.	679
RBX1_YEAST	RING-box protein HRT1 (RING-box protein 1) (E3 ubiquitin-protein ligase complex SCF subunit HRT1) (High level expression reduces Ty3 transposition protein 1) (Regulator of cullins protein 1)	170	1.3	23	17.7307	Ambiguous	Both	BioGrid	13.94		D.C.	2693
RPC8_YEAST	DNA-directed RNA polymerase III subunit RPC8 (RNA polymerase III subunit C8) (DNA-directed RNA polymerase III 25 kDa polypeptide) (RNA polymerase III subunit C25)	170	0.5	23	45.9083	Ambiguous	Nucleus		24.326		D.C.	1030
PUR1_YEAST	Amidophosphoribosyltransferase (ATase) (EC 2.4.2.14) (Glutamine phosphoribosylpyrophosphate amidotransferase)	2.4	0.1	23	399.33	Ambiguous			56.719		D.C.	119
QCR1_YEAST	Cytochrome b-c1 complex subunit 1, mitochondrial (Complex III subunit 1) (Core protein I) (Ubiquinol-cytochrome-c reductase complex core protein 1)	46	0.1	23	174.053	Ambiguous	Cytoplasm		50.228	MT	D.C.	205
MTD1_YEAST	Methylenetetrahydrofolate dehydrogenase [NAD(+)] (EC 1.5.1.15)	1.3	0	23	638.949	Ambiguous	Both		36.24		D.C.	2236
STI1_YEAST	Heat shock protein STI1	0.6	0	23	821.85	Ambiguous	Cytoplasm		66.265		D.C.	406
UTP25_YEAST	U3 small nucleolar RNA-associated protein 25 (U3 snoRNA-associated protein 25) (U three protein 25)	160	0.9	22	23.0146	Ambiguous	Nucleus		83.991		D.C.	1613
SHE2_YEAST	SWI5-dependent HO expression protein 2	160	0.7	22	30.4926	Ambiguous	Both		28.251		D.C.	1069
RPA1_YEAST	DNA-directed RNA polymerase I subunit RPA190 (EC 2.7.7.6) (DNA-directed RNA polymerase I 190 kDa polypeptide) (A190) (DNA-directed RNA polymerase I largest subunit)	330	0.6	22	36.7589	Ambiguous	Nucleus		186.432		D.C.	321
RRP4_YEAST	Exosome complex component RRP4 (Ribosomal RNA-processing protein 4)	160	0.6	22	35.136	Ambiguous	Both		39.427		D.C.	1335
IMH1_YEAST	Golgin IMH1 (Integrins and myosins homology protein 1)	2.6	0.5	22	42.4135	Ambiguous	Cytoplasm		105.225		D.C.	2612
YHS2_YEAST	MIP18 family protein YHR122W	160	0.5	22	42.9573	Ambiguous			25.675		D.C.	1361
RS29A_YEAST	40S ribosomal protein S29-A (S36) (YS29)	160	0.3	22	65.581	Ambiguous	Cytoplasm		6.661		D.C.	1660
PUR7_YEAST	Phosphoribosylaminoimidazole-succinocarboxamide synthase (EC 6.3.2.6) (SAICAR synthetase)	0.5	0	22	1711.19	Ambiguous			34.603		D.C.	709
SKI2_YEAST	Antiviral helicase SKI2 (EC 3.6.4.13) (Superkiller protein 2)	5.5	1.3	21	16.6336	Ambiguous	Cytoplasm		146.059		D.C.	1026
SMC3_YEAST	Structural maintenance of chromosomes protein 3 (DA-box protein SMC3)	150	1.1	21	19.7703	Ambiguous	Nucleus	BioGrid	141.336		D.C.	1791
TRM7_YEAST	tRNA (cytidine(32)/guanosine(34)-2'-O)-methyltransferase (EC 2.1.1.205) (2'-O-ribose RNA methyltransferase TRM7) (tRNA methylase 7)	150	1	21	21.0086	Ambiguous	Cytoplasm		34.701		D.C.	1213
PAF1_YEAST	RNA polymerase II-associated protein 1 (Protein PAF1)	150	0.7	21	31.5023	Ambiguous	Nucleus		51.801		D.C.	1254
PRS10_YEAST	26S protease subunit RPT4 (26S protease subunit SUG2) (Proteasomal cap subunit)	32	0.2	21	127.947	Ambiguous			49.408		D.C.	2059
OSH7_YEAST	Oxysterol-binding protein homolog 7	1.7	0.1	21	256.636	Ambiguous			49.805		D.C.	1316
FPPS_YEAST	Farnesyl pyrophosphate synthase (FPP synthase) (FPS) (EC 2.5.1.10) ((2E,6E)-farnesyl diphosphate synthase) (Dimethylallyltranstransferase) (EC 2.5.1.1) (Farnesyl diphosphate synthase) (Geranyltranstransferase)	0.7	0	21	1378.8	Ambiguous	Cytoplasm		40.483		D.C.	245
SYQ_YEAST	Glutamine--tRNA ligase (EC 6.1.1.18) (Glutaminyl-tRNA synthetase) (GlnRS)	120	0	21	521.933	Ambiguous			93.133		D.C.	358
TRP_YEAST	Tryptophan synthase (EC 4.2.1.20)	0.4	0	21	1996.61	Ambiguous			76.626		D.C.	90
SEC10_YEAST	Exocyst complex component SEC10	140	1.9	20	10.3588	Ambiguous			100.342		D.C.	2546
CYAA_YEAST	Adenylate cyclase (EC 4.6.1.1) (ATP pyrophosphate-lyase) (Adenylyl cyclase)	140	1.5	20	12.9953	Ambiguous			227.834		D.C.	248
RHEB_YEAST	Rheb-like protein RHB1 (GTP-binding protein RSG1)	140	0.8	20	26.4837	Ambiguous	Cytoplasm		23.338		D.C.	647
RPA43_YEAST	DNA-directed RNA polymerase I subunit RPA43 (A43) (DNA-directed DNA-dependent RNA polymerase 36 kDa polypeptide)	17	0.7	20	30.7665	Ambiguous	Nucleus		36.224		D.C.	1755
YL257_YEAST	Uncharacterized protein YLR257W	0.6	0.2	20	84.042	Ambiguous	Cytoplasm		35.998		D.C.	2530
GPD1_YEAST	Glycerol-3-phosphate dehydrogenase [NAD(+)] 1 (EC 1.1.1.8)	7.8	0.1	20	220.245	Ambiguous	Cytoplasm		42.869		D.C.	2197
PSB3_YEAST	Proteasome subunit beta type-3 (EC 3.4.25.1) (Macropain subunit PUP3) (Multicatalytic endopeptidase complex subunit PUP3) (Proteasome component PUP3)	140	0	20	602.066	Ambiguous	Both		22.605		D.C.	655
THIL_YEAST	Acetyl-CoA acetyltransferase (EC 2.3.1.9) (Acetoacetyl-CoA thiolase) (Ergosterol biosynthesis protein 10)	2	0	20	1619.98	Ambiguous	Cytoplasm		41.729		D.C.	1665
TUP1_YEAST	General transcriptional corepressor TUP1 (Flocculation suppressor protein) (Glucose repression regulatory protein TUP1) (Repressor AER2)	1.7	0	20	626.067	Ambiguous	Nucleus		78.308		D.C.	428
UTP8_YEAST	U3 small nucleolar RNA-associated protein 8 (U3 snoRNA-associated protein 8) (U three protein 8) (U3 protein 8 required for transcription) (t-UTP8)	140	1.9	19	10.0966	Ambiguous	Nucleus	BioGrid	80.191		D.C.	2034
TAF12_YEAST	Transcription initiation factor TFIID subunit 12 (TAFII-61) (TAFII61) (TAFII-68) (TAFII68) (TBP-associated factor 12) (TBP-associated factor 61 kDa)	1.6	1.6	19	11.8654	Ambiguous	Nucleus		61.073		D.C.	2353
YPT35_YEAST	PX domain-containing protein YPT35	140	1.6	19	11.6485	Ambiguous	Cytoplasm		24.646		D.C.	1350
RAD26_YEAST	DNA repair and recombination protein RAD26 (EC 3.6.4.12) (ATP-dependent helicase RAD26)	140	1.4	19	13.9628	Ambiguous	Nucleus		124.528		D.C.	1570
NOP58_YEAST	Nucleolar protein 58 (Nucleolar protein 5)	38	1	19	19.3232	Ambiguous	Nucleus		56.956		D.C.	2932
GET3_YEAST	ATPase GET3 (EC 3.6.-.-) (Arsenical pump-driving ATPase) (Arsenite-stimulated ATPase) (Golgi to ER traffic protein 3) (Guided entry of tail-anchored proteins 3)	1.8	0.3	19	72.0494	Ambiguous	Cytoplasm		39.354		D.C.	2808
DOT5_YEAST	Peroxiredoxin DOT5 (EC 1.11.1.15) (Disrupter of telomere silencing protein 5) (Nuclear thiol peroxidase) (nTPx) (Thioredoxin reductase)	5.4	0.1	19	170.386	Ambiguous	Nucleus		24.12		D.C.	1629
SLT2_YEAST	Mitogen-activated protein kinase SLT2/MPK1 (MAP kinase MPK1) (EC 2.7.11.24)	13	0.1	19	244.011	Ambiguous			55.636		D.C.	2210
PSA3_YEAST	Proteasome subunit alpha type-3 (EC 3.4.25.1) (Macropain subunit Y13) (Multicatalytic endopeptidase complex subunit Y13) (Proteasome component Y13) (Proteinase YSCE subunit 13)	1	0	19	753.328	Ambiguous	Both		28.714		D.C.	590
PYC2_YEAST	Pyruvate carboxylase 2 (EC 6.4.1.1) (Pyruvic carboxylase 2) (PCB 2)	2.4	0	19	1270.58	Ambiguous	Cytoplasm		130.167		D.C.	787
SERC_YEAST	Phosphoserine aminotransferase (PSAT) (EC 2.6.1.52) (Phosphohydroxythreonine aminotransferase)	2.3	0	19	1000.3	Ambiguous			43.416		D.C.	957
TAF3_YEAST	Transcription initiation factor TFIID subunit 3 (TAFII-47) (TAFII47) (TBP-associated factor 3) (TBP-associated factor 47 kDa)	1.2	9.6	18	1.88207	Ambiguous	Nucleus		40.296		D.C.	2860
CDC73_YEAST	Cell division control protein 73 (RNA polymerase-associated protein CDC73)	21	1.4	18	13.0366	Ambiguous	Nucleus		44.456		D.C.	2610
H1_YEAST	Histone H1	130	1.3	18	14.2897	Ambiguous	Nucleus		27.804		D.C.	2061
PP2C7_YEAST	Protein phosphatase 2C homolog 7, mitochondrial (PP2C-7) (EC 3.1.3.16)	130	1.1	18	16.4838	Ambiguous	Cytoplasm		37.782	MT	D.C.	1338
BEM4_YEAST	Bud emergence protein 4	2.6	1	18	17.7556	Ambiguous			70.993		D.C.	1420
MRN1_YEAST	RNA-binding protein MRN1 (Multicopy suppressor of RSC-NHP6 synthetic lethality protein 1) (Post-transcriptional regulator of 69 kDa)	15	0.8	18	22.8687	Ambiguous	Cytoplasm		68.664		D.C.	2739
SMD2_YEAST	Small nuclear ribonucleoprotein Sm D2 (Sm-D2) (snRNP core protein D2)	130	0.5	18	38.5254	Ambiguous	Nucleus		12.853		D.C.	2543
GLT1_YEAST	Glutamate synthase [NADH] (EC 1.4.1.14) (NADH-GOGAT)	14	0.1	18	282.728	Ambiguous			238.102		D.C.	2951
VATC_YEAST	V-type proton ATPase subunit C (V-ATPase subunit C) (V-ATPase 42 kDa subunit) (Vacuolar proton pump subunit C)	1.5	0	18	482.733	Ambiguous	Cytoplasm		44.189		D.C.	770
FMP52_YEAST	Protein FMP52, mitochondrial (Found in mitochondrial proteome protein 52)	120	1.2	17	13.9214	Ambiguous	Cytoplasm		25.086	MT	D.C.	1499
RPC5_YEAST	DNA-directed RNA polymerase III subunit RPC5 (RNA polymerase III subunit C5) (DNA-directed RNA polymerase III 37 kDa polypeptide) (RNA polymerase III subunit C37)	120	0.9	17	18.1715	Ambiguous	Nucleus		32.142		D.C.	1092
UBP15_YEAST	Ubiquitin carboxyl-terminal hydrolase 15 (EC 3.4.19.12) (Deubiquitinating enzyme 15) (Ubiquitin thioesterase 15) (Ubiquitin-specific-processing protease 15)	45	0.8	17	23.0911	Ambiguous			143.564		D.C.	1905
VPS74_YEAST	Vacuolar protein sorting-associated protein 74	1.4	0.5	17	36.3345	Ambiguous	Cytoplasm		39.287		D.C.	2561
ODPA_YEAST	Pyruvate dehydrogenase E1 component subunit alpha, mitochondrial (EC 1.2.4.1) (Pyruvate dehydrogenase complex component E1 alpha) (PDHE1-A)	2.7	0.3	17	51.1758	Ambiguous	Cytoplasm		46.343	MT	D.C.	419
RL39_YEAST	60S ribosomal protein L39 (L46) (YL40)	120	0.3	17	54.3141	Ambiguous	Cytoplasm		6.342		D.C.	128
CTR9_YEAST	RNA polymerase-associated protein CTR9 (Centromere-binding factor 1-dependent protein 1) (Cln three-requiring protein 9)	23	0.2	17	74.4674	Ambiguous	Nucleus		124.709		D.C.	2195
PST2_YEAST	Protoplast secreted protein 2	120	0.2	17	73.9337	Ambiguous	Other		20.966	ER	D.C.	2873
PSB2_YEAST	Proteasome subunit beta type-2 (EC 3.4.25.1) (Macropain subunit PUP1) (Multicatalytic endopeptidase complex subunit PUP1) (Proteasome component PUP1) (Proteinase YSCE subunit PUP1)	120	0.1	17	257.931	Ambiguous	Both		28.268		D.C.	613
RPN11_YEAST	Ubiquitin carboxyl-terminal hydrolase RPN11 (EC 3.4.19.12) (26S proteasome regulatory subunit RPN11) (Protein MPR1)	2.4	0.1	17	157.839	Ambiguous		BioGrid	34.398		D.C.	1730
PDR16_YEAST	Phosphatidylinositol transfer protein PDR16 (PITP) (Pleiotropic drug resistance protein 16) (SEC14 homolog 3)	1.4	1.2	16	12.9492	Ambiguous	Cytoplasm		40.714		D.C.	2108
UTP22_YEAST	U3 small nucleolar RNA-associated protein 22 (U3 snoRNA-associated protein 22) (U three protein 22)	21	1.1	16	14.104	Ambiguous	Nucleus		140.485		D.C.	2023
RPC9_YEAST	DNA-directed RNA polymerase III subunit RPC9 (RNA polymerase III subunit C9) (RNA polymerase III subunit C17)	110	0.9	16	17.9421	Ambiguous	Nucleus		18.596		D.C.	1806
XRS2_YEAST	DNA repair protein XRS2	110	0.5	16	31.791	Ambiguous			96.365		D.C.	947
RPAB2_YEAST	DNA-directed RNA polymerases I, II, and III subunit RPABC2 (RNA polymerases I, II, and III subunit ABC2) (ABC23) (DNA-directed RNA polymerases I, II, and III 23 kDa polypeptide)	110	0.3	16	57.5826	Ambiguous	Both		17.91		D.C.	497
MAP2_YEAST	Methionine aminopeptidase 2 (MAP 2) (MetAP 2) (EC 3.4.11.18) (Peptidase M)	110	0.2	16	67.1767	Ambiguous	Cytoplasm		47.518		D.C.	1190
CDC11_YEAST	Cell division control protein 11	9.2	0.1	16	184.29	Ambiguous	Cytoplasm		47.649		D.C.	820
RPN5_YEAST	26S proteasome regulatory subunit RPN5 (Proteasome non-ATPase subunit 5)	2.7	0.1	16	156.45	Ambiguous			51.768		D.C.	2842
ALDH4_YEAST	Potassium-activated aldehyde dehydrogenase, mitochondrial (EC 1.2.1.5) (K(+)-activated acetaldehyde dehydrogenase) (K(+)-ACDH)	29	0	16	365.537	Ambiguous	Cytoplasm		56.724	MT	D.C.	1752
ARF2_YEAST	ADP-ribosylation factor 2	3.1	0	16	432.406	Ambiguous	Cytoplasm		20.658		D.C.	466
ILV3_YEAST	Dihydroxy-acid dehydratase, mitochondrial (DAD) (EC 4.2.1.9) (2,3-dihydroxy acid hydrolyase)	1.8	0	16	615.635	Ambiguous	Cytoplasm		62.861	MT	D.C.	1439
KAD2_YEAST	Adenylate kinase (EC 2.7.4.3) (ATP-AMP transphosphorylase) (ATP:AMP phosphotransferase) (Adenylate kinase cytosolic and mitochondrial) (Adenylate monophosphate kinase)	1.2	0	16	1298.75	Ambiguous	Cytoplasm		24.255		D.C.	197
PSB4_YEAST	Proteasome subunit beta type-4 (EC 3.4.25.1) (Macropain subunit C11) (Multicatalytic endopeptidase complex subunit C11) (Proteasome component C11) (Proteinase YSCE subunit 11)	1.6	0	16	488.397	Ambiguous	Both		22.517		D.C.	542
PUB1_YEAST	Nuclear and cytoplasmic polyadenylated RNA-binding protein PUB1 (ARS consensus-binding protein ACBP-60) (Poly uridylate-binding protein) (Poly(U)-binding protein)	0.2	0	16	382.11	Ambiguous	Both		50.763		D.C.	867
PTA1_YEAST	Pre-tRNA-processing protein PTA1	110	1.2	15	12.2111	Ambiguous	Nucleus		88.473		D.C.	2218
SCW10_YEAST	Probable family 17 glucosidase SCW10 (EC 3.2.1.-) (Soluble cell wall protein 10)	110	1.2	15	12.4608	Ambiguous	Other		40.469	ER	D.C.	2472
UTP14_YEAST	U3 small nucleolar RNA-associated protein 14 (U3 snoRNA-associated protein 14) (U three protein 14)	110	1.1	15	14.2226	Ambiguous	Nucleus		103.023		D.C.	2441
RPC6_YEAST	DNA-directed RNA polymerase III subunit RPC6 (RNA polymerase III subunit C6) (C34) (DNA-directed RNA polymerase III 36 kDa polypeptide)	110	1	15	16.1288	Ambiguous	Nucleus		36.135		D.C.	933
RL1D1_YEAST	Ribosome biogenesis protein UTP30 (U3 snoRNP-associated protein UTP30)	110	0.6	15	25.3242	Ambiguous	Nucleus		31.616		D.C.	1101
CAJ1_YEAST	Protein CAJ1	1.1	0.5	15	29.1709	Ambiguous			44.855		D.C.	1430
CMS1_YEAST	Protein CMS1 (Complementation of MCM10 suppressor protein 1)	110	0.5	15	30.0752	Ambiguous	Nucleus		33.394		D.C.	2665
MCM3_YEAST	DNA replication licensing factor MCM3 (EC 3.6.4.12) (Minichromosome maintenance protein 3)	110	0.5	15	29.7444	Ambiguous	Nucleus	NESdb	107.518		D.C.	599
RL44B_YEAST	60S ribosomal protein L42-B (L41) (Maintenance of killer protein 18) (YL27) (YP44)	100	0.5	15	30.8992	Ambiguous	Cytoplasm		12.212		D.C.	286
GCS1_YEAST	ADP-ribosylation factor GTPase-activating protein GCS1 (ARF GAP GCS1)	39	0.4	15	37.16	Ambiguous	Cytoplasm		39.296		D.C.	1024
CDC42_YEAST	Cell division control protein 42 (Suppressor of RHO3 protein 2)	110	0.1	15	109.549	Ambiguous	Cytoplasm		21.323		D.C.	464
PIL1_YEAST	Sphingolipid long chain base-responsive protein PIL1	2.8	0.1	15	227.829	Ambiguous	Other		38.349		D.C.	2022
KCY_YEAST	Uridylate kinase (UK) (EC 2.7.4.14) (ATP:UMP phosphotransferase) (Deoxycytidylate kinase) (CK) (dCMP kinase) (Suppressor of cdc8 protein) (Uridine monophosphate kinase) (UMP kinase) (UMPK)	0.8	0	15	1186.39	Ambiguous	Both		22.933		D.C.	404
SYWC_YEAST	Tryptophan--tRNA ligase, cytoplasmic (EC 6.1.1.2) (Tryptophanyl-tRNA synthetase) (TrpRS)	2.3	0	15	358.499	Ambiguous	Cytoplasm		49.35		D.C.	2794
CDC16_YEAST	Anaphase-promoting complex subunit CDC16 (Cell division control protein 16)	7.7	5.7	14	2.52251	Ambiguous	Nucleus		94.992		D.C.	263
RTN1_YEAST	Reticulon-like protein 1	100	1.9	14	7.27477	Ambiguous	Cytoplasm		32.916	TM	D.C.	2471
RSA3_YEAST	Ribosome assembly protein 3	100	1.6	14	8.73269	Ambiguous	Nucleus		24.656		D.C.	2513
VID30_YEAST	Vacuolar import and degradation protein 30 (Glucose-induced degradation protein 1)	100	1.4	14	10.0193	Ambiguous	Both		108.179		D.C.	1953
PP2A1_YEAST	Serine/threonine-protein phosphatase PP2A-1 catalytic subunit (EC 3.1.3.16)	37	1.3	14	11.3903	Ambiguous			41.938		D.C.	587
RPAB5_YEAST	DNA-directed RNA polymerases I, II, and III subunit RPABC5 (RNA polymerases I, II, and III subunit ABC5) (ABC10-beta) (ABC8) (DNA-directed RNA polymerases I, II, and III 8.3 kDa polypeptide)	99	1	14	14.3951	Ambiguous	Nucleus		8.278		D.C.	541
NAA25_YEAST	N-terminal acetyltransferase B complex subunit MDM20 (NatB complex subunit MDM20) (Dislikes extra CIN8 protein 1) (Mitochondrial distribution and morphology protein 20)	100	0.8	14	16.8209	Ambiguous	Cytoplasm		92.809		D.C.	2892
PSK1_YEAST	Serine/threonine-protein kinase PSK1 (EC 2.7.11.1) (PAS kinase 1)	7.1	0.8	14	17.4287	Ambiguous	Cytoplasm		152.332		D.C.	765
HRP1_YEAST	Nuclear polyadenylated RNA-binding protein 4 (Cleavage factor IB) (CFIB)	3.2	0.7	14	18.5484	Ambiguous	Both	BioGrid	59.65		D.C.	2993
MTAP_YEAST	S-methyl-5'-thioadenosine phosphorylase (EC 2.4.2.28) (5'-methylthioadenosine phosphorylase) (MTA phosphorylase) (MTAP) (MTAPase) (Multicopy enhancer of UAS2)	8.8	0.3	14	53.7132	Ambiguous	Both		37.857		D.C.	2670
NCBP1_YEAST	Nuclear cap-binding protein complex subunit 1 (80 kDa nuclear cap-binding protein) (CBP80) (NCBP 80 kDa subunit) (Glycolysis regulation protein 3) (Protein SUT1) (Suppressor of TOP1 protein)	23	0.2	14	92.9682	Ambiguous	Both		100.018		D.C.	985
RRB1_YEAST	Ribosome assembly protein RRB1	10	0.2	14	88.0136	Ambiguous	Nucleus		57.261		D.C.	2406
SDS22_YEAST	Protein phosphatase 1 regulatory subunit SDS22	41	0.2	14	64.0533	Ambiguous	Nucleus		38.887		D.C.	1062
ESS1_YEAST	Peptidyl-prolyl cis-trans isomerase ESS1 (PPIase ESS1) (EC 5.2.1.8) (Parvulin ESS1) (Processing/termination factor 1)	98	0.1	14	246.805	Ambiguous	Both		19.405		D.C.	564
MED16_YEAST	Mediator of RNA polymerase II transcription subunit 16 (Global transcriptional regulator SIN4) (Mediator complex subunit 16) (SNF1 suppressor protein 4) (SWI4 suppressor protein 5) (Transcriptional silencing factor 3) (YGP1 expression regulatory protein 1)	9.2	12	13	1.09619	Ambiguous	Nucleus		111.297		D.C.	779
EXO84_YEAST	Exocyst complex component EXO84 (Exocyst complex protein of 84 kDa) (U1 SNP1-associating protein 3)	92	1.8	13	6.95479	Ambiguous	Cytoplasm		85.538		D.C.	1223
SEC8_YEAST	Exocyst complex component SEC8	6.7	1.7	13	7.81511	Ambiguous	Cytoplasm		122.225		D.C.	915
YG1B_YEAST	Uncharacterized protein YGR017W	97	0.8	13	16.8529	Ambiguous			34.679		D.C.	2009
YP089_YEAST	Dilute domain-containing protein YPR089W	91	0.8	13	16.7093	Ambiguous	Cytoplasm		102.579		D.C.	57
NRD1_YEAST	Protein NRD1	92	0.7	13	18.4431	Ambiguous	Nucleus		63.859		D.C.	2070
YIK8_YEAST	Putative zinc metalloproteinase YIL108W (EC 3.4.24.-)	92	0.6	13	19.9529	Ambiguous	Cytoplasm		77.414		D.C.	1603
BNI5_YEAST	Bud neck protein 5	24	0.4	13	29.5438	Ambiguous	Cytoplasm		49.694		D.C.	2123
C1TM_YEAST	C-1-tetrahydrofolate synthase, mitochondrial (C1-THF synthase) [Includes: Methylenetetrahydrofolate dehydrogenase (EC 1.5.1.5); Methenyltetrahydrofolate cyclohydrolase (EC 3.5.4.9); Formyltetrahydrofolate synthetase (EC 6.3.4.3)]	94	0.3	13	40.7851	Ambiguous	Cytoplasm		106.217	MT	D.C.	257
NCBP2_YEAST	Nuclear cap-binding protein subunit 2 (20 kDa nuclear cap-binding protein) (NCBP 20 kDa subunit) (CBP20)	90	0.2	13	73.3946	Ambiguous	Both		23.774		D.C.	2735
PROB_YEAST	Glutamate 5-kinase (GK) (EC 2.7.2.11) (Gamma-glutamyl kinase)	35	0.2	13	73.0856	Ambiguous	Cytoplasm		47.162		D.C.	781
BBC1_YEAST	Myosin tail region-interacting protein MTI1 (Protein BBC1)	3.3	0.1	13	122.103	Ambiguous	Cytoplasm		128.297		D.C.	1803
CLH_YEAST	Clathrin heavy chain	0.8	0.1	13	225.168	Ambiguous	Cytoplasm		187.234		D.C.	539
ADH3_YEAST	Alcohol dehydrogenase 3, mitochondrial (EC 1.1.1.1) (Alcohol dehydrogenase III) (YADH-3)	1.9	0	13	745.111	Ambiguous	Cytoplasm		40.37	MT	D.C.	202
UGPA1_YEAST	UTP--glucose-1-phosphate uridylyltransferase (EC 2.7.7.9) (UDP-glucose pyrophosphorylase) (UDPGP) (UGPase)	2.2	0	13	536.735	Ambiguous			55.988		D.C.	917
UTP10_YEAST	U3 small nucleolar RNA-associated protein 10 (U3 snoRNA-associated protein 10) (U three protein 10) (U3 protein 10 required for transcription) (t-UTP10)	84	1.6	12	7.43988	Ambiguous	Both		200.082		D.C.	1707
CUE5_YEAST	Ubiquitin-binding protein CUE5 (Coupling of ubiquitin conjugation to ER degradation protein 5)	4.1	1.1	12	10.7746	Ambiguous	Cytoplasm		46.87		D.C.	2697
SN114_YEAST	Pre-mRNA-splicing factor SNU114 (114 kDa U5 small nuclear ribonucleoprotein component) (Growth inhibitory protein 10)	86	1	12	12.1058	Ambiguous	Nucleus		114.041		D.C.	1063
SEC3_YEAST	Exocyst complex component SEC3 (Protein PSL1)	88	0.7	12	17.9296	Ambiguous		BioGrid	154.695		D.C.	959
GID7_YEAST	Glucose-induced degradation protein 7	85	0.6	12	21.227	Ambiguous	Both		84.517		D.C.	666
CTF8_YEAST	Chromosome transmission fidelity protein 8	87	0.3	12	39.7341	Ambiguous	Nucleus		15.169		D.C.	1380
T2FA_YEAST	Transcription initiation factor IIF subunit alpha (TFIIF-alpha) (TFIIF large subunit) (Transcription factor G 105 kDa subunit) (P105)	87	0.3	12	37.4526	Ambiguous	Nucleus		82.194		D.C.	1680
GDE1_YEAST	Glycerophosphodiester phosphodiesterase GDE1 (EC 3.1.4.46)	85	0.2	12	51.3615	Ambiguous	Cytoplasm		138.014		D.C.	2284
RRP46_YEAST	Exosome complex component RRP46 (Ribosomal RNA-processing protein 46)	87	0.2	12	52.0045	Ambiguous	Both		24.407		D.C.	2025
SEC18_YEAST	Vesicular-fusion protein SEC18	6.7	0.1	12	182.753	Ambiguous	Cytoplasm		84.056		D.C.	458
SEC7_YEAST	Protein transport protein SEC7	140	0.1	12	131.755	Ambiguous	Cytoplasm		226.886		D.C.	322
YPT31_YEAST	GTP-binding protein YPT31/YPT8 (Rab GTPase YPT31)	3.5	0.1	12	90.8459	Ambiguous	Cytoplasm		24.469		D.C.	1265
CAPZA_YEAST	F-actin-capping protein subunit alpha	10	0	12	297.717	Ambiguous			30.699		D.C.	729
GCST_YEAST	Aminomethyltransferase, mitochondrial (EC 2.1.2.10) (Glycine cleavage system T protein) (GCVT) (Glycine decarboxylase complex subunit T)	13	0	12	341.365	Ambiguous	Cytoplasm		44.469	MT	D.C.	1858
GUAA_YEAST	GMP synthase [glutamine-hydrolyzing] (EC 6.3.5.2) (GMP synthetase) (Glutamine amidotransferase)	1.2	0	12	939.124	Ambiguous	Cytoplasm		58.482		D.C.	1271
PSB5_YEAST	Proteasome subunit beta type-5 (EC 3.4.25.1) (Macropain subunit PRE2) (Multicatalytic endopeptidase complex subunit PRE2) (Proteasome component PRE2) (Proteinase YSCE subunit PRE2)	89	0	12	332.626	Ambiguous	Both		31.637		D.C.	756
NRP1_YEAST	Asparagine-rich protein (Protein ARP)	80	1.6	11	6.78875	Ambiguous			79.299		D.C.	895
TRS33_YEAST	Trafficking protein particle complex subunit 33 (TRAPP subunit 33) (Transport protein particle 33 kDa subunit)	80	1.6	11	6.81777	Ambiguous	Cytoplasm		30.749		D.C.	2994
DPB2_YEAST	DNA polymerase epsilon subunit B (EC 2.7.7.7) (DNA polymerase II subunit 2)	82	1.3	11	9.05182	Ambiguous	Both		78.34		D.C.	603
RIX1_YEAST	Pre-rRNA-processing protein RIX1 (Involved in processing IST2 protein 2) (Ribosomal export protein 1)	82	1.2	11	9.92259	Ambiguous	Nucleus		86.739		D.C.	1383
CIAO1_YEAST	Cytosolic iron-sulfur protein assembly protein 1	76	0.6	11	16.4791	Ambiguous	Both		37.275		D.C.	2494
MYO4_YEAST	Myosin-4 (SWI5-dependent HO expression protein 1)	82	0.6	11	19.9622	Ambiguous	Other		169.344		D.C.	838
SMC1_YEAST	Structural maintenance of chromosomes protein 1 (DA-box protein SMC1)	77	0.6	11	17.4045	Ambiguous	Nucleus		141.28		D.C.	931
BDF1_YEAST	Bromodomain-containing factor 1	82	0.4	11	31.0544	Ambiguous	Nucleus		76.978		D.C.	1035
HGH1_YEAST	Protein HGH1 (HMG1/2 protein homolog)	80	0.3	11	35.2039	Ambiguous			44.951		D.C.	1863
YBY9_YEAST	Putative serine carboxypeptidase YBR139W (EC 3.4.16.-)	18	0.2	11	44.1831	Ambiguous			57.639		D.C.	1162
YPT52_YEAST	GTP-binding protein YPT52	16	0.2	11	57.6068	Ambiguous	Cytoplasm		26.132		D.C.	1053
CHS5_YEAST	Chitin biosynthesis protein CHS5 (Protein CAL3)	76	0.1	11	82.778	Ambiguous	Cytoplasm		73.639		D.C.	2795
ETFB_YEAST	Probable electron transfer flavoprotein subunit beta (Beta-ETF) (Changed intracellular redox state protein 1)	5.3	0.1	11	196.579	Ambiguous	Cytoplasm		28.759		D.C.	1702
RPN3_YEAST	26S proteasome regulatory subunit RPN3	7.1	0.1	11	98.7188	Ambiguous			60.393		D.C.	1504
CRH1_YEAST	Probable glycosidase CRH1 (EC 3.2.-.-) (Congo red hypersensitive protein 1)	81	0	11	335.247	Ambiguous	Cytoplasm		52.758	ER	D.C.	2041
OTC_YEAST	Ornithine carbamoyltransferase (EC 2.1.3.3) (Ornithine transcarbamylase) (OTCase)	4.6	0	11	301.134	Ambiguous	Cytoplasm		37.845		D.C.	140
PNC1_YEAST	Nicotinamidase (EC 3.5.1.19) (Nicotine deamidase) (NAMase)	1.8	0	11	733.665	Ambiguous	Both		24.993		D.C.	1998
MHP1_YEAST	MAP-homologous protein 1	74	1.6	10	6.52229	Ambiguous	Cytoplasm		155.207		D.C.	1746
NLE1_YEAST	Ribosome assembly protein 4 (Notchless protein homolog 1) (Ribosome biogenesis factor RSA4)	4.3	0.5	10	20.7792	Ambiguous	Nucleus		57.026		D.C.	649
CSL4_YEAST	Exosome complex component CSL4 (CEP1 synthetic lethal protein 4)	23	0.4	10	26.7708	Ambiguous	Both		31.583		D.C.	2107
YHR2_YEAST	Uncharacterized trans-sulfuration enzyme YHR112C	73	0.1	10	119.099	Ambiguous			42.445		D.C.	1300
DDP1_YEAST	Diphosphoinositol polyphosphate phosphohydrolase DDP1 (EC 3.6.1.52) (Diadenosine 5',5'''-P1,P6-hexaphosphate hydrolase) (Ap6A hydrolase) (Diadenosine and diphosphoinositol polyphosphate phosphohydrolase 1) (Diadenosine hexaphosphate hydrolase (AMP-forming)) (EC 3.6.1.60)	73	0	10	236.045	Ambiguous	Both		21.572		D.C.	2991
SBA1_YEAST	Co-chaperone protein SBA1	1	0	10	861.487	Ambiguous			24.082		D.C.	730
YNT3_YEAST	Uncharacterized protein YNL193W	72	1.2	9.9	8.49159	Ambiguous			63.917		D.C.	2113
PAN1_YEAST	Actin cytoskeleton-regulatory complex protein PAN1 (Mitochondrial distribution of proteins protein 3)	11	0.5	9.9	20.0262	Ambiguous	Cytoplasm		160.267		D.C.	848
PANB_YEAST	3-methyl-2-oxobutanoate hydroxymethyltransferase (EC 2.1.2.11) (Extracellular matrix protein 31) (Ketopantoate hydroxymethyltransferase)	22	0.9	9.8	10.933	Ambiguous			34.465		D.C.	1169
ACH1_YEAST	Acetyl-CoA hydrolase (EC 3.1.2.1) (Acetyl-CoA deacylase) (Acetyl-CoA acylase)	12	0.3	9.8	32.6618	Ambiguous	Cytoplasm		58.712		D.C.	784
SDS23_YEAST	Protein SDS23	71	0.2	9.8	54.8321	Ambiguous	Both		58.098		D.C.	1994
FKS1_YEAST	1,3-beta-glucan synthase component FKS1 (EC 2.4.1.34) (1,3-beta-D-glucan-UDP glucosyltransferase) (Calcineurin dependent protein 1) (Calcofluor white hypersensitivity protein 53) (Echinocandin target gene protein 1) (FK506 sensitivity protein 1) (Glucan synthase of cerevisiae protein 1) (Papulacandin B resistance protein 1)	69	0.9	9.6	10.4001	Ambiguous	Cytoplasm		214.851	TM	D.C.	1277
HSP74_YEAST	Heat shock protein SSA4	3.7	0.8	9.6	12.0309	Ambiguous	Cytoplasm		69.651		D.C.	546
TMC1_YEAST	AN1-type zinc finger protein TMC1 (Trivalent metalloid-sensitive Cuz1-related protein 1)	69	0.5	9.6	18.475	Ambiguous	Nucleus		16.734		D.C.	2699
DHR1_YEAST	Probable ATP-dependent RNA helicase DHR1 (EC 3.6.4.13) (DEAH box RNA helicase DHR1) (Extracellular mutant protein 16)	69	0.4	9.6	21.6819	Ambiguous	Nucleus		144.955		D.C.	2404
LDB7_YEAST	Chromatin structure-remodeling complex protein RSC14 (Low dye-binding protein 7) (Remodel the structure of chromatin complex subunit 14)	69	0.3	9.5	33.6465	Ambiguous	Nucleus		19.792		D.C.	1203
RM15_YEAST	54S ribosomal protein L15, mitochondrial (YmL15)	67	0.7	9.3	14.4996	Ambiguous	Cytoplasm		28.167	MT	D.C.	1122
KPR4_YEAST	Ribose-phosphate pyrophosphokinase 4 (EC 2.7.6.1) (Phosphoribosyl pyrophosphate synthase 4)	5.7	0.2	9.3	38.7829	Ambiguous	Cytoplasm		35.72		D.C.	1146
GLY1_YEAST	Low specificity L-threonine aldolase (Low specificity L-TA) (TA) (EC 4.1.2.48)	0.6	0	9.2	534.667	Ambiguous			42.815		D.C.	1135
PRK1_YEAST	Actin-regulating kinase PRK1 (EC 2.7.11.1) (p53-regulating kinase 1)	8.3	8.7	9.1	1.04563	Ambiguous	Cytoplasm		91.032		D.C.	1610
BNI4_YEAST	Protein BNI4	46	1.2	9.1	7.60326	Ambiguous			100.59		D.C.	2106
RPA12_YEAST	DNA-directed RNA polymerase I subunit RPA12 (A12) (A12.2) (DNA-directed RNA polymerase I 13.7 kDa polypeptide)	64	0.4	8.9	23.67	Ambiguous	Nucleus		13.661		D.C.	854
RPB11_YEAST	DNA-directed RNA polymerase II subunit RPB11 (RNA polymerase II subunit B11) (B13.6) (DNA-directed RNA polymerase II 13.6 kDa polypeptide)	64	0.3	8.9	28.897	Ambiguous	Nucleus		13.616		D.C.	1392
UBC4_YEAST	Ubiquitin-conjugating enzyme E2 4 (EC 6.3.2.19) (Ubiquitin carrier protein 4) (Ubiquitin-protein ligase 4)	64	0	8.9	713.011	Ambiguous			16.456		D.C.	407
NHP6B_YEAST	Non-histone chromosomal protein 6B	64	0.5	8.8	16.5158	Ambiguous	Nucleus		11.476		D.C.	331
RSC7_YEAST	Chromatin structure-remodeling complex subunit RSC7 (Nuclear protein localization protein 6) (Remodel the structure of chromatin complex subunit 7)	63	1.1	8.7	8.21382	Ambiguous	Nucleus		49.651		D.C.	910
FUN30_YEAST	ATP-dependent helicase FUN30 (EC 3.6.4.12)	63	0.3	8.7	32.1062	Ambiguous	Nucleus		128.507		D.C.	766
LEO1_YEAST	RNA polymerase-associated protein LEO1	4.4	0.3	8.7	27.8624	Ambiguous	Nucleus		53.92		D.C.	1263
ABF2_YEAST	ARS-binding factor 2, mitochondrial	62	1.4	8.6	6.17203	Ambiguous	Both		21.562	MT	D.C.	2250
RSC8_YEAST	Chromatin structure-remodeling complex protein RSC8 (Remodel the structure of chromatin complex subunit 8) (SWI3 homolog)	62	0.1	8.6	94.7628	Ambiguous	Nucleus		63.168		D.C.	1739
UBA4_YEAST	Adenylyltransferase and sulfurtransferase UBA4 (Needs CLA4 to survive protein 3) (Ubiquitin-like protein activator 4) [Includes: Adenylyltransferase UBA4 (EC 2.7.7.-); Sulfurtransferase UBA4 (EC 2.8.1.-)]	3	0.1	8.6	78.705	Ambiguous	Cytoplasm		49.361		D.C.	1354
DHE2_YEAST	NAD-specific glutamate dehydrogenase (NAD-GDH) (EC 1.4.1.2)	1.5	0	8.6	586.664	Ambiguous			124.332		D.C.	956
SKI3_YEAST	Superkiller protein 3	62	0.6	8.5	15.2307	Ambiguous	Both		163.726		D.C.	448
RIR2_YEAST	Ribonucleoside-diphosphate reductase small chain 1 (EC 1.17.4.1) (Ribonucleotide reductase R2 subunit 1) (Ribonucleotide reductase small subunit 1)	0.3	0	8.5	552.504	Ambiguous	Both		46.147		D.C.	265
SEC5_YEAST	Exocyst complex component SEC5	61	0.9	8.4	9.40684	Ambiguous			112.121		D.C.	2194
TFS2_YEAST	Transcription elongation factor S-II (DNA strand transfer protein alpha) (STP-alpha) (DNA strand transferase 1) (Pyrimidine pathway regulatory protein 2)	61	0.4	8.4	22.3171	Ambiguous	Nucleus		34.843		D.C.	216
DPB3_YEAST	DNA polymerase epsilon subunit C (EC 2.7.7.7) (DNA polymerase II subunit C)	60	0.6	8.3	12.9882	Ambiguous	Nucleus		22.665		D.C.	702
FAS2_YEAST	Fatty acid synthase subunit alpha (EC 2.3.1.86) [Includes: Acyl carrier; 3-oxoacyl-[acyl-carrier-protein] reductase (EC 1.1.1.100) (Beta-ketoacyl reductase); 3-oxoacyl-[acyl-carrier-protein] synthase (EC 2.3.1.41) (Beta-ketoacyl synthase)]	1.3	0	8.3	568.101	Ambiguous			206.947		D.C.	465
POP5_YEAST	Ribonucleases P/MRP protein subunit POP5 (EC 3.1.26.5) (RNA-processing protein POP5) (RNases P/MRP 19.6 kDa subunit)	59	0.3	8.2	28.8315	Ambiguous	Both		19.574		D.C.	720
T2FB_YEAST	Transcription initiation factor IIF subunit beta (EC 3.6.4.12) (ATP-dependent helicase TFG2) (TFIIF medium subunit) (TFIIF-beta) (Transcription factor G 54 kDa subunit)	58	0.7	8	11.0844	Ambiguous	Nucleus		46.605		D.C.	1681
CUZ1_YEAST	CDC48-associated ubiquitin-like/zinc finger protein 1 (CDC48-associated UBL/Zn-finger protein 1)	58	0.3	8	27.3154	Ambiguous	Both		31.517		D.C.	2128
PHO85_YEAST	Cyclin-dependent protein kinase PHO85 (EC 2.7.11.22) (Negative regulator of the PHO system) (Serine/threonine-protein kinase PHO85)	22	0.2	8	40.0345	Ambiguous	Both		34.906		D.C.	437
OPLA_YEAST	5-oxoprolinase (EC 3.5.2.9) (5-oxo-L-prolinase) (5-OPase) (Pyroglutamase)	58	0.1	8	93.6237	Ambiguous	Cytoplasm		140.428		D.C.	726
VAC14_YEAST	Vacuole morphology and inheritance protein 14 (Swollen vacuole phenotype 2 protein)	13	1.4	7.9	5.56428	Ambiguous	Cytoplasm		99.773		D.C.	2615
RAD33_YEAST	DNA repair protein RAD33	57	0.7	7.9	10.9877	Ambiguous	Nucleus		20.27		D.C.	2409
LCF1_YEAST	Long-chain-fatty-acid--CoA ligase 1 (EC 6.2.1.3) (Fatty acid activator 1) (Long-chain acyl-CoA synthetase 1)	35	0.5	7.9	15.2541	Ambiguous			77.866		D.C.	755
RHO1_YEAST	GTP-binding protein RHO1 (Rho-type GTPase 1)	5.2	0.1	7.9	73.3688	Ambiguous	Cytoplasm		23.152		D.C.	186
DIB1_YEAST	Spliceosomal protein DIB1	56	0.1	7.8	83.5349	Ambiguous	Nucleus		16.776		D.C.	2618
VATH_YEAST	V-type proton ATPase subunit H (V-ATPase subunit H) (V-ATPase 54 kDa subunit) (Vacuolar proton pump subunit H)	1.1	0	7.8	648.523	Ambiguous	Cytoplasm		54.416		D.C.	1670
SPB4_YEAST	ATP-dependent rRNA helicase SPB4 (EC 3.6.4.-) (Suppressor of PAB1 protein 4)	55	1.2	7.7	6.67413	Ambiguous	Nucleus		69.422		D.C.	688
DPOA2_YEAST	DNA polymerase alpha subunit B (DNA polymerase I subunit B) (DNA polymerase alpha:primase complex p86 subunit) (Pol alpha-primase complex p86 subunit) (DNA polymerase-primase complex p74 subunit)	55	0.6	7.7	13.021	Ambiguous	Nucleus		78.774		D.C.	1168
RRP45_YEAST	Exosome complex component RRP45 (Ribosomal RNA-processing protein 45)	55	0.4	7.7	19.5612	Ambiguous	Both		33.962		D.C.	2497
STH1_YEAST	Nuclear protein STH1/NPS1 (EC 3.6.4.12) (ATP-dependent helicase STH1) (Chromatin structure-remodeling complex protein STH1) (SNF2 homolog)	16	0.2	7.7	33.3156	Ambiguous	Nucleus		156.743		D.C.	871
OSH3_YEAST	Oxysterol-binding protein homolog 3	55	1.8	7.6	4.23362	Ambiguous	Cytoplasm		113.76		D.C.	1297
THO1_YEAST	Protein THO1	3.7	0.2	7.6	38.6768	Ambiguous			24.138		D.C.	1516
RAS2_YEAST	Ras-like protein 2	55	0.1	7.6	57.7706	Ambiguous	Cytoplasm		34.705		D.C.	98
RUXF_YEAST	Small nuclear ribonucleoprotein F (snRNP-F) (Sm protein F) (Sm-F) (SmF)	53	1.2	7.4	6.41727	Ambiguous	Nucleus		9.66		D.C.	2179
RT107_YEAST	Regulator of Ty1 transposition protein 107 (Establishes silent chromatin protein 4)	53	0.4	7.4	21.4081	Ambiguous	Nucleus		123.017		D.C.	1367
PKH1_YEAST	Serine/threonine-protein kinase PKH1 (EC 2.7.11.1) (3-phosphoinositide-dependent protein kinase 1)	53	1.7	7.3	4.42978	Ambiguous			86.253		D.C.	2325
PRA1_YEAST	Prenylated Rab acceptor 1	53	1	7.3	7.70603	Ambiguous	Cytoplasm		19.412	TM	D.C.	2074
BRR2_YEAST	Pre-mRNA-splicing helicase BRR2 (EC 3.6.4.13) (Protein Snu246)	52	0.5	7.3	14.807	Ambiguous	Nucleus		246.185		D.C.	888
GIP3_YEAST	GLC7-interacting protein 3	52	0.4	7.3	20.8291	Ambiguous	Cytoplasm		140.891		D.C.	2287
TDA3_YEAST	Putative oxidoreductase TDA3 (EC 1.-.-.-) (Batten disease protein 3) (Topoisomerase I damage affected protein 3)	1.9	0.1	7.2	130.834	Ambiguous	Cytoplasm		57.614		D.C.	1317
DLDH_YEAST	Dihydrolipoyl dehydrogenase, mitochondrial (EC 1.8.1.4) (Dihydrolipoamide dehydrogenase) (Glycine decarboxylase complex subunit L) (Lipoamide dehydrogenase component of pyruvate dehydrogenase complex) (Pyruvate dehydrogenase complex E3 component)	4.2	0	7.2	175.145	Ambiguous	Cytoplasm		54.01	MT	D.C.	260
YBY7_YEAST	UPF0303 protein YBR137W	51	0.5	7.1	15.0793	Ambiguous	Cytoplasm		20.454		D.C.	1230
PHS_YEAST	Putative pterin-4-alpha-carbinolamine dehydratase (PHS) (EC 4.2.1.96) (4-alpha-hydroxy-tetrahydropterin dehydratase) (Pterin carbinolamine dehydratase) (PCD)	50	1.6	7	4.50484	Ambiguous			14.026		D.C.	1308
RL21B_YEAST	60S ribosomal protein L21-B	51	1.2	7	5.86172	Ambiguous			18.274		D.C.	2949
YNE0_YEAST	Putative alanyl-tRNA editing protein alaX (AlaX) (AlaXp) (AlaXp-II) (Alanyl-tRNA deacylase alaX)	16	0.3	7	21.1716	Ambiguous			50.964		D.C.	2152
GLYM_YEAST	Serine hydroxymethyltransferase, mitochondrial (SHMT) (EC 2.1.2.1) (Glycine hydroxymethyltransferase) (Serine methylase)	51	0	7	198.694	Ambiguous	Cytoplasm		53.686	MT	D.C.	1131
TRMB_YEAST	tRNA (guanine-N(7)-)-methyltransferase (EC 2.1.1.33) (Transfer RNA methyltransferase 8) (tRNA (guanine(46)-N(7))-methyltransferase) (tRNA(m7G46)-methyltransferase)	50	0	7	175.98	Ambiguous	Nucleus		33.391		D.C.	2757
ATG18_YEAST	Autophagy-related protein 18 (Cytoplasm to vacuole targeting protein 18) (Needed for premeiotic replication protein 1) (Swollen vacuole phenotype protein 1)	50	1.6	6.9	4.30026	Ambiguous	Cytoplasm		55.102		D.C.	1737
AROF_YEAST	Phospho-2-dehydro-3-deoxyheptonate aldolase, phenylalanine-inhibited (EC 2.5.1.54) (3-deoxy-D-arabino-heptulosonate 7-phosphate synthase) (DAHP synthase) (Phospho-2-keto-3-deoxyheptonate aldolase)	1.1	0	6.9	337.307	Ambiguous			41.07		D.C.	384
DOHH_YEAST	Deoxyhypusine hydroxylase (DOHH) (EC 1.14.99.29) (Deoxyhypusine dioxygenase) (Deoxyhypusine monooxygenase) (Ligand of eIF5A protein 1)	0.4	0	6.9	532.537	Ambiguous	Both		36.165		D.C.	1826
FAS1_YEAST	Fatty acid synthase subunit beta (EC 2.3.1.86) [Includes: 3-hydroxyacyl-[acyl-carrier-protein] dehydratase (EC 4.2.1.59); Enoyl-[acyl-carrier-protein] reductase [NADH] (EC 1.3.1.9); [Acyl-carrier-protein] acetyltransferase (EC 2.3.1.38); [Acyl-carrier-protein] malonyltransferase (EC 2.3.1.39); S-acyl fatty acid synthase thioesterase (EC 3.1.2.14)]	1.9	0	6.8	634.712	Ambiguous			228.691		D.C.	196
GLRX4_YEAST	Monothiol glutaredoxin-4	49	0	6.8	179.492	Ambiguous			27.493		D.C.	889
SDS24_YEAST	Protein SDS24	18	0.2	6.7	33.6519	Ambiguous	Cytoplasm		57.187		D.C.	1237
YBF5_YEAST	Deoxyribonuclease Tat-D (EC 3.1.21.-)	46	0.4	6.4	16.6625	Ambiguous	Cytoplasm		47.39		D.C.	992
MTR4_YEAST	ATP-dependent RNA helicase DOB1 (EC 3.6.4.13) (mRNA transport regulator MTR4)	46	0.2	6.4	37.6359	Ambiguous	Nucleus		122.055		D.C.	1794
SGT2_YEAST	Small glutamine-rich tetratricopeptide repeat-containing protein 2 (SGT/UBP) (Viral protein U-binding protein)	2.2	0.2	6.4	33.7713	Ambiguous	Cytoplasm		37.218		D.C.	2797
GEA2_YEAST	ARF guanine-nucleotide exchange factor 2	46	0.1	6.4	63.2707	Ambiguous	Cytoplasm	BioGrid	165.668		D.C.	1492
EMI2_YEAST	Putative glucokinase-2 (EC 2.7.1.2) (Early meiotic induction protein 2) (Glucose kinase 2) (GLK-2)	46	0	6.4	141.766	Ambiguous	Cytoplasm		55.921		D.C.	2429
PRP6_YEAST	Pre-mRNA-splicing factor 6	3.7	10	6.2	0.621081	Ambiguous	Nucleus		104.229		D.C.	478
EXO70_YEAST	Exocyst complex component EXO70 (Exocyst complex protein of 70 kDa)	45	1.2	6.2	5.18921	Ambiguous	Cytoplasm		71.294		D.C.	476
YPT7_YEAST	GTP-binding protein YPT7	45	0.2	6.2	27.5362	Ambiguous	Cytoplasm		23.043		D.C.	938
KAPS_YEAST	Adenylyl-sulfate kinase (EC 2.7.1.25) (ATP adenosine-5'-phosphosulfate 3'-phosphotransferase) (Adenosine-5'-phosphosulfate kinase) (APS kinase)	45	0.1	6.2	114.293	Ambiguous			23.06		D.C.	2237
YSH1_YEAST	Endoribonuclease YSH1 (EC 3.1.27.-) (Yeast 73 kDa homolog 1) (mRNA 3'-end-processing protein YSH1)	44	1.4	6.1	4.4084	Ambiguous	Nucleus		87.674		D.C.	2545
UBR1_YEAST	E3 ubiquitin-protein ligase UBR1 (EC 6.3.2.-) (N-end-recognizing protein) (N-recognin-1)	88	0.3	6.1	23.9993	Ambiguous			224.838		D.C.	480
CAPZB_YEAST	F-actin-capping protein subunit beta	1.3	0	6.1	206.387	Ambiguous	Cytoplasm		32.629		D.C.	363
RRP42_YEAST	Exosome complex component RRP42 (Ribosomal RNA-processing protein 42)	43	0.3	6	20.4	Ambiguous	Both		29.055		D.C.	2854
3HAO_YEAST	3-hydroxyanthranilate 3,4-dioxygenase (EC 1.13.11.6) (3-hydroxyanthranilate oxygenase) (3-HAO) (3-hydroxyanthranilic acid dioxygenase) (HAD) (Biosynthesis of nicotinic acid protein 1)	2.4	0	6	380.745	Ambiguous	Both		20.235		D.C.	1813
RL22B_YEAST	60S ribosomal protein L22-B (L1c) (RP4) (YL31)	42	0.8	5.9	7.75027	Ambiguous	Cytoplasm		13.827		D.C.	2181
RAD3_YEAST	DNA repair helicase RAD3 (EC 3.6.4.12) (General transcription and DNA repair factor IIH subunit RAD3) (TFIIH subunit RAD3)	42	0.8	5.8	6.88215	Ambiguous	Nucleus		89.786		D.C.	193
HSP26_YEAST	Heat shock protein 26 (26 kDa heat shock protein)	42	0.2	5.8	35.2764	Ambiguous			23.88		D.C.	414
MAD1_YEAST	Spindle assembly checkpoint component MAD1 (Mitotic arrest deficient protein 1)	42	0.2	5.8	34.5648	Ambiguous	Nucleus	NESdb	87.651		D.C.	1650
PSA1_YEAST	Proteasome subunit alpha type-1 (EC 3.4.25.1) (Macropain subunit C7-alpha) (Multicatalytic endopeptidase complex C7) (Proteasome component C7-alpha) (Proteasome component Y8) (Proteinase YSCE subunit 7) (SCL1 suppressor protein)	5.1	0	5.8	546.613	Ambiguous	Both		28.001		D.C.	515
MLC1_YEAST	Myosin light chain 1 (Calmodulin-like myosin light chain MLC1) (Myosin-2 light chain)	41	0.4	5.7	16.2349	Ambiguous	Cytoplasm		16.444		D.C.	1984
GDIR_YEAST	Rho GDP-dissociation inhibitor (Rho GDI)	41	0	5.7	219.535	Ambiguous	Cytoplasm		23.138		D.C.	2909
RDS3_YEAST	Pre-mRNA-splicing factor RDS3 (Regulator of drug sensitivity 3)	40	0.5	5.6	11.3544	Ambiguous	Nucleus		12.26		D.C.	2622
NNT1_YEAST	Protein N-methyltransferase NNT1 (EC 2.1.1.-) (Nicotinamide N-methyltransferase-like protein 1)	41	0	5.6	202.135	Ambiguous	Cytoplasm		29.633		D.C.	2504
RM01_YEAST	54S ribosomal protein L1, mitochondrial	40	0.9	5.5	6.02448	Ambiguous	Cytoplasm		30.996	MT	D.C.	2446
DPOA_YEAST	DNA polymerase alpha catalytic subunit A (EC 2.7.7.7) (DNA polymerase I subunit A) (DNA polymerase alpha:primase complex p180 subunit) (DNA polymerase-primase complex p180 subunit) (Pol alpha-primase complex p180 subunit)	3.7	0.3	5.5	18.823	Ambiguous	Nucleus		166.809		D.C.	360
CWC24_YEAST	Pre-mRNA-splicing factor CWC24 (Complexed with CEF1 protein 24)	39	1.1	5.4	4.91245	Ambiguous	Nucleus		29.741		D.C.	2090
SEC15_YEAST	Exocyst complex component SEC15	39	0.7	5.4	7.83227	Ambiguous	Cytoplasm		105.064		D.C.	554
IPYR2_YEAST	Inorganic pyrophosphatase, mitochondrial (EC 3.6.1.1) (Pyrophosphate phospho-hydrolase) (PPase)	39	0.6	5.4	9.31243	Ambiguous	Cytoplasm		35.573	MT	D.C.	722
TPM2_YEAST	Tropomyosin-2	39	0.3	5.4	17.7276	Ambiguous	Cytoplasm		19.093		D.C.	1580
EF1G1_YEAST	Elongation factor 1-gamma 1 (EF-1-gamma 1) (Calcium and membrane-binding protein 1) (Calcium phospholipid-binding protein) (CPBP) (Eukaryotic elongation factor 1Bgamma 1) (eEF1Bgamma 1) (Translation elongation factor 1B gamma 1)	0.4	0	5.4	521.746	Ambiguous	Both		47.088		D.C.	749
YHS7_YEAST	Uncharacterized protein YHR127W	38	1.5	5.3	3.50119	Ambiguous			27.132		D.C.	1362
RPOM_YEAST	DNA-directed RNA polymerase, mitochondrial (EC 2.7.7.6)	1	0.5	5.3	9.92415	Ambiguous	Cytoplasm		153.047	MT	D.C.	362
ADH6_YEAST	NADP-dependent alcohol dehydrogenase 6 (EC 1.1.1.2) (NADP-dependent alcohol dehydrogenase VI) (ScADHVI)	38	0	5.3	389.788	Ambiguous			39.618		D.C.	2468
PEX1_YEAST	Peroxisomal ATPase PEX1 (Peroxin-1) (Peroxisomal assembly protein 1) (Peroxisome biogenesis protein PAS1)	38	1.6	5.2	3.34881	Ambiguous	Cytoplasm		117.276		D.C.	596
SWD3_YEAST	COMPASS component SWD3 (Complex proteins associated with SET1 protein SWD3) (Set1C component SWD3)	37	1	5.2	5.25772	Ambiguous	Nucleus		34.754		D.C.	1170
VPS53_YEAST	Vacuolar protein sorting-associated protein 53	37	0.9	5.2	5.52348	Ambiguous	Cytoplasm		95.449		D.C.	1801
ISW1_YEAST	ISWI chromatin-remodeling complex ATPase ISW1 (EC 3.6.4.-)	37	0.1	5.2	48.3037	Ambiguous	Nucleus		131.102		D.C.	1176
YSF3_YEAST	RDS3 complex subunit 10 (Splicing factor 3b subunit)	37	0.7	5.1	7.11139	Ambiguous	Nucleus		10.027		D.C.	268
RNA14_YEAST	mRNA 3'-end-processing protein RNA14	37	0.5	5.1	11.1031	Ambiguous	Both	BioGrid	79.96		D.C.	619
KAPR_YEAST	cAMP-dependent protein kinase regulatory subunit (cAPK regulatory subunit) (Bypass of cyclase mutations protein 1) (Protein kinase A regulatory subunit) (PKA regulatory subunit)	1.3	0.1	5.1	82.8014	Ambiguous	Both		47.219		D.C.	221
MLH1_YEAST	DNA mismatch repair protein MLH1 (MutL protein homolog 1) (Post meiotic segregation protein 2)	36	1.8	5	2.81846	Ambiguous	Nucleus		87.062		D.C.	1399
RPC7_YEAST	DNA-directed RNA polymerase III subunit RPC7 (RNA polymerase III subunit C7) (DNA-directed RNA polymerase III 31 kDa polypeptide) (C31)	36	0.9	5	5.70177	Ambiguous	Nucleus		27.724		D.C.	449
PSA7_YEAST	Probable proteasome subunit alpha type-7 (EC 3.4.25.1) (Macropain subunit C1) (Multicatalytic endopeptidase complex subunit C1) (Proteasome component C1) (Proteinase YSCE subunit 1)	2	0	5	324.753	Ambiguous	Both		31.536		D.C.	514
UFD4_YEAST	Ubiquitin fusion degradation protein 4 (UB fusion protein 4)	35	0.1	4.9	36.9314	Ambiguous			167.843		D.C.	941
CWC26_YEAST	Pre-mRNA-splicing factor CWC26 (Bud site selection protein 13) (Complexed with CEF1 protein 26) (Synthetic lethal with CLF1 protein 7)	34	1.4	4.8	3.50985	Ambiguous	Both		30.472		D.C.	1769
SOK2_YEAST	Protein SOK2	34	1.2	4.8	4.10387	Ambiguous	Nucleus		85.643		D.C.	2056
MGDP1_YEAST	Putative magnesium-dependent phosphatase YER134C (EC 3.1.3.48)	35	0.1	4.8	75.7564	Ambiguous	Both		20.441		D.C.	1532
THDH_YEAST	Threonine dehydratase, mitochondrial (EC 4.3.1.19) (Threonine deaminase)	1.3	0	4.8	117.827	Ambiguous	Cytoplasm		63.831	MT	D.C.	89
CASP_YEAST	Protein CASP	1.2	8.3	4.7	0.563513	Ambiguous	Cytoplasm		77.514	TM	D.C.	998
PET10_YEAST	Protein PET10 (Petite colonies protein 10)	34	1	4.7	4.84114	Ambiguous	Cytoplasm		31.246		D.C.	1099
VPS10_YEAST	Vacuolar protein sorting/targeting protein VPS10 (Carboxypeptidase Y receptor) (CPY receptor) (Carboxypeptidase Y-deficient protein 1) (Sortilin VPS10) (Vacuolar carboxypeptidase sorting receptor VPS10) (Vacuolar protein sorting-associated protein 10) (Vacuolar protein-targeting protein 1)	34	1	4.7	4.49813	Ambiguous	Cytoplasm		177.777	TM ER	D.C.	785
RRP40_YEAST	Exosome complex component RRP40 (Ribosomal RNA-processing protein 40)	34	0.2	4.7	21.6804	Ambiguous	Both		26.556		D.C.	2695
YP148_YEAST	Uncharacterized protein YPR148C	2.4	0.1	4.7	54.8961	Ambiguous	Cytoplasm		49.279		D.C.	2581
AGE2_YEAST	ADP-ribosylation factor GTPase-activating protein effector protein 2 (ARF GAP effector protein 2)	2.6	0.1	4.6	50.98	Ambiguous	Cytoplasm		32.638		D.C.	1623
PHO81_YEAST	Phosphate system positive regulatory protein PHO81 (CDK inhibitor PHO81)	33	0.1	4.6	81.3891	Ambiguous	Both		134.029		D.C.	440
TRS20_YEAST	Trafficking protein particle complex subunit 20 (TRAPP subunit 20) (Transport protein particle 20 kDa subunit)	33	0.7	4.5	6.30007	Ambiguous	Cytoplasm		19.7		D.C.	1245
DOM34_YEAST	Protein DOM34 (EC 3.1.-.-)	22	0.6	4.5	7.01011	Ambiguous	Cytoplasm		44.058		D.C.	948
RRT14_YEAST	Regulator of rDNA transcription protein 14	32	0.4	4.5	10.926	Ambiguous	Nucleus		23.845		D.C.	1597
BNA3_YEAST	Probable kynurenine--oxoglutarate transaminase BNA3 (EC 2.6.1.7) (Biosynthesis of nicotinic acid protein 3) (Kynurenine aminotransferase)	3.3	0.1	4.5	68.9315	Ambiguous	Cytoplasm		50.082		D.C.	1792
LRP1_YEAST	Exosome complex protein LRP1 (Like an rRNA processing protein 1) (Yeast C1D domain-containing protein) (rRNA processing protein 47)	32	0.6	4.4	7.56542	Ambiguous	Nucleus		21.045		D.C.	1340
SFH1_YEAST	Chromatin structure-remodeling complex subunit SFH1 (RSC complex subunit SFH1) (SNF5 homolog 1)	32	0.3	4.4	15.4617	Ambiguous	Nucleus		48.777		D.C.	2536
BCK1_YEAST	Serine/threonine-protein kinase BCK1/SLK1/SSP31 (EC 2.7.11.1)	32	0.2	4.4	19.9536	Ambiguous	Cytoplasm		164.195		D.C.	2219
KPC1_YEAST	Protein kinase C-like 1 (PKC 1) (EC 2.7.11.13)	31	0.3	4.3	15.8588	Ambiguous			131.477		D.C.	605
HEK2_YEAST	Heterogeneous nuclear rnp K-like protein 2 (KH domain-containing protein 1)	1.2	0.1	4.3	31.6131	Ambiguous	Both		41.683		D.C.	1198
PP2C3_YEAST	Protein phosphatase 2C homolog 3 (PP2C-3) (EC 3.1.3.16)	2.3	0.1	4.3	46.9062	Ambiguous	Both		51.332		D.C.	993
ARA1_YEAST	D-arabinose dehydrogenase [NAD(P)+] heavy chain (EC 1.1.1.117) (AKR3C)	1	0	4.3	370.523	Ambiguous	Cytoplasm		38.884		D.C.	1166
STE5_YEAST	Protein STE5	31	1.6	4.2	2.68597	Ambiguous	Cytoplasm		102.727		D.C.	937
YND5_YEAST	Uncharacterized WD repeat-containing protein YNL035C	31	0.4	4.2	12.279	Ambiguous			43.848		D.C.	2153
RPC1_YEAST	DNA-directed RNA polymerase III subunit RPC1 (RNA polymerase III subunit C1) (EC 2.7.7.6) (DNA-directed RNA polymerase III largest subunit) (RNA polymerase III subunit C160)	31	0.1	4.2	31.6178	Ambiguous	Nucleus		162.301		D.C.	121
GSHR_YEAST	Glutathione reductase (GR) (GRase) (EC 1.8.1.7)	0.8	0	4.2	300.877	Ambiguous	Cytoplasm		53.441		D.C.	1687
SPT6_YEAST	Transcription elongation factor SPT6 (Chromatin elongation factor SPT6)	30	0	4.2	121.612	Ambiguous	Nucleus		168.291		D.C.	589
TAF8_YEAST	Transcription initiation factor TFIID subunit 8 (TAFII-65) (TBP-associated factor 65 kDa) (TBP-associated factor 8)	29	1	4.1	4.26101	Ambiguous	Nucleus		57.986		D.C.	2350
ALY2_YEAST	Arrestin-related trafficking adapter 3 (Arrestin-like protein 2)	30	0.9	4.1	4.6474	Ambiguous	Cytoplasm		117.216		D.C.	1789
TAF2_YEAST	Transcription initiation factor TFIID subunit 2 (TAFII-150) (TBP-associated factor 150 kDa) (TBP-associated factor 2) (TSM-1)	29	0.5	4.1	8.80838	Ambiguous	Nucleus		161.471		D.C.	575
RAP1_YEAST	DNA-binding protein RAP1 (Repressor/activator site-binding protein) (SBF-E) (TUF)	29	0.1	4.1	62.2126	Ambiguous	Nucleus		92.413		D.C.	337
TRE2_YEAST	Putative zinc metalloprotease TRE2 (EC 3.-.-.-) (Transferrin receptor-like protein 2)	29	1.2	4	3.37557	Ambiguous	Cytoplasm		91.995	TM	D.C.	2719
DPM1_YEAST	Dolichol-phosphate mannosyltransferase (EC 2.4.1.83) (Dolichol-phosphate mannose synthase) (DPM synthase) (Dolichyl-phosphate beta-D-mannosyltransferase) (Mannose-P-dolichol synthase) (MPD synthase)	29	0.3	4	11.6852	Ambiguous	Cytoplasm		30.362	TM	D.C.	367
KPR5_YEAST	Ribose-phosphate pyrophosphokinase 5 (EC 2.7.6.1) (Phosphoribosyl pyrophosphate synthase 5)	0.4	0	4	142.632	Ambiguous	Cytoplasm		53.505		D.C.	2847
UBC1_YEAST	Ubiquitin-conjugating enzyme E2 1 (EC 6.3.2.19) (Ubiquitin carrier protein) (Ubiquitin-conjugating enzyme E2-24 kDa) (Ubiquitin-protein ligase)	0.8	0	4	325.174	Ambiguous			24.178		D.C.	528
YJF5_YEAST	LOG family protein YJL055W	0.8	0	4	272.678	Ambiguous			26.864		D.C.	1793
CLP1_YEAST	mRNA cleavage and polyadenylation factor CLP1	28	1.1	3.9	3.63649	Ambiguous	Nucleus		50.226		D.C.	2715
ATG21_YEAST	Autophagy-related protein 21 (Cytoplasm to vacuole transport protein 21) (Homologous with SVP1 protein 1) (Maturation of proaminopeptidase I protein 1)	28	0.6	3.9	6.33339	Ambiguous	Cytoplasm		55.188		D.C.	2275
MG101_YEAST	Mitochondrial genome maintenance protein MGM101	28	0.3	3.9	12.8447	Ambiguous	Cytoplasm		30.091	MT	D.C.	902
RTF1_YEAST	RNA polymerase-associated protein RTF1	28	0.1	3.9	39.7333	Ambiguous	Nucleus		65.869		D.C.	1949
TRX1_YEAST	Thioredoxin-1 (Thioredoxin I) (TR-I) (Thioredoxin-2)	28	0	3.9	248.724	Ambiguous	Both		11.235		D.C.	553
NMA2_YEAST	Nicotinamide-nucleotide adenylyltransferase 2 (EC 2.7.7.1) (NAD(+) diphosphorylase 2) (NAD(+) pyrophosphorylase 2) (NMN adenylyltransferase 2)	27	1.5	3.8	2.56745	Ambiguous	Nucleus		44.909		D.C.	2007
ECM29_YEAST	Proteasome component ECM29 (Extracellular mutant protein 29)	28	0	3.8	152.916	Ambiguous	Both		210.431		D.C.	1304
YCU1_YEAST	Ankyrin repeat-containing protein YCR051W	27	0	3.8	174.108	Ambiguous			24.694		D.C.	675
YO087_YEAST	Uncharacterized WD repeat-containing protein YOL087C	26	1	3.7	3.52491	Ambiguous	Cytoplasm		125.382		D.C.	2984
PRP8_YEAST	Pre-mRNA-splicing factor 8	29	0.3	3.7	12.7253	Ambiguous	Nucleus		279.504		D.C.	960
KPYK2_YEAST	Pyruvate kinase 2 (PK 2) (EC 2.7.1.40)	5.8	0.1	3.7	35.9755	Ambiguous			55.195		D.C.	1927
YL287_YEAST	Uncharacterized protein YLR287C	26	0.1	3.7	25.3866	Ambiguous	Cytoplasm		40.928		D.C.	2505
HSP78_YEAST	Heat shock protein 78, mitochondrial	4	0	3.7	160.141	Ambiguous	Cytoplasm		91.336	MT	D.C.	968
TPS3_YEAST	Trehalose synthase complex regulatory subunit TPS3 (Alpha,alpha-trehalose-phosphate synthase [UDP-forming] 115 kDa subunit)	4.8	0	3.7	115.018	Ambiguous	Cytoplasm		118.835		D.C.	1258
PXL1_YEAST	Paxillin-like protein 1	26	0.9	3.6	4.22691	Ambiguous			79.434		D.C.	1114
TRM61_YEAST	tRNA (adenine(58)-N(1))-methyltransferase catalytic subunit TRM61 (EC 2.1.1.220) (General control non-derepressible protein 14) (Protein GCD14) (tRNA(m1A58)-methyltransferase subunit TRM61) (tRNA(m1A58)MTase subunit TRM61)	12	0.2	3.6	23.5717	Ambiguous	Nucleus		43.92		D.C.	1773
HDA1_YEAST	Histone deacetylase HDA1 (EC 3.5.1.98)	26	0.1	3.6	38.3569	Ambiguous	Nucleus		80.07		D.C.	2157
RLF2_YEAST	Chromatin assembly factor 1 subunit p90 (CAF-1 90 kDa subunit) (RAP1 localization factor 2)	25	0.4	3.5	8.38782	Ambiguous	Nucleus		70.21		D.C.	2930
PP4R3_YEAST	Serine/threonine-protein phosphatase 4 regulatory subunit 3 (PP4R3)	25	0.3	3.5	10.3026	Ambiguous	Nucleus		98.053		D.C.	1548
SIN3_YEAST	Transcriptional regulatory protein SIN3	25	0.2	3.5	24.2412	Ambiguous	Nucleus		174.839		D.C.	563
ARL1_YEAST	ADP-ribosylation factor-like protein 1 (Arf-like GTPase 1)	1.5	0	3.4	220.315	Ambiguous	Cytoplasm		20.434		D.C.	1167
TAF1_YEAST	Transcription initiation factor TFIID subunit 1 (EC 2.3.1.48) (TAFII-130) (TAFII-145) (TBP-associated factor 1) (TBP-associated factor 145 kDa)	24	0.6	3.3	5.76762	Ambiguous	Nucleus		120.696		D.C.	1761
MRD1_YEAST	Multiple RNA-binding domain-containing protein 1	24	0.1	3.3	40.3911	Ambiguous	Nucleus		101.12		D.C.	2525
RL36A_YEAST	60S ribosomal protein L36-A (L39) (YL39)	24	0.1	3.3	64.2803	Ambiguous	Cytoplasm		11.124		D.C.	58
SYF1_YEAST	Pre-mRNA-splicing factor SYF1 (PRP19-associated complex protein 90) (Synthetic lethal with CDC40 protein 1)	23	1	3.2	3.07376	Ambiguous	Nucleus		100.229		D.C.	2385
RAV1_YEAST	Regulator of V-ATPase in vacuolar membrane protein 1 (Suppression of the onset of impotence protein 3)	23	0.3	3.2	10.0568	Ambiguous	Cytoplasm		154.933		D.C.	1817
2A5D_YEAST	Serine/threonine-protein phosphatase 2A 56 kDa regulatory subunit delta isoform (PP2A, B subunit, B' delta isoform) (Protein RTS1) (Protein SCS1)	23	0.1	3.2	34.6038	Ambiguous	Both		85.335		D.C.	1393
RRP44_YEAST	Exosome complex exonuclease DIS3 (EC 3.1.13.-) (EC 3.1.26.-) (Chromosome disjunction protein 3) (Ribosomal RNA-processing protein 44)	23	0.1	3.2	31.1535	Ambiguous	Both		113.707		D.C.	2680
RSC58_YEAST	Chromatin structure-remodeling complex protein RSC58 (Remodel the structure of chromatin complex subunit 58)	23	1	3.1	3.01025	Ambiguous	Nucleus		57.794		D.C.	2675
MYO5_YEAST	Myosin-5 (Actin-dependent myosin-I MYO5) (Class I unconventional myosin MYO5) (Type I myosin MYO5)	18	0.1	3.1	42.9589	Ambiguous	Cytoplasm		136.899		D.C.	2436
GSHB_YEAST	Glutathione synthetase (GSH synthetase) (GSH-S) (EC 6.3.2.3) (Glutathione synthase)	23	0	3.1	68.1153	Ambiguous			55.815		D.C.	2684
SHS1_YEAST	Seventh homolog of septin 1 (Septation protein 7)	22	0	3.1	68.1543	Ambiguous	Cytoplasm		62.63		D.C.	2650
TREA_YEAST	Neutral trehalase (EC 3.2.1.28) (Alpha,alpha-trehalase) (Alpha,alpha-trehalose glucohydrolase)	22	0	3.1	147.399	Ambiguous	Cytoplasm		85.879		D.C.	800
PDP1_YEAST	[Pyruvate dehydrogenase [acetyl-transferring]]-phosphatase 1, mitochondrial (PDP 1) (EC 3.1.3.43) (Phosphatase two C protein 5) (Protein phosphatase 2C homolog 5) (PP2C-5) (Protein phosphatase of PDH protein 1) (Pyruvate dehydrogenase complex phosphatase 1) (PDC phosphatase 1)	22	1.9	3	1.63176	Ambiguous	Cytoplasm		63.669	MT	D.C.	2938
APC10_YEAST	Anaphase-promoting complex subunit DOC1 (Destruction of cyclin B protein 1)	22	1	3	3.15234	Ambiguous	Both		28.777		D.C.	1951
PRP18_YEAST	Pre-mRNA-splicing factor 18	22	0.3	3	9.04714	Ambiguous	Nucleus		28.377		D.C.	966
RRP6_YEAST	Exosome complex exonuclease RRP6 (EC 3.1.13.-) (Ribosomal RNA-processing protein 6)	22	0.3	3	12.1697	Ambiguous	Nucleus		84.039		D.C.	2807
TRI1_YEAST	Protein TRI1	22	0.3	3	8.84739	Ambiguous	Both		26.471		D.C.	2477
DPOD2_YEAST	DNA polymerase delta small subunit (EC 2.7.7.7) (Hydroxyurea-sensitive protein 2)	8.4	0.2	3	12.8002	Ambiguous	Nucleus		55.296		D.C.	1772
PUS4_YEAST	tRNA pseudouridine synthase 4 (EC 5.4.99.25) (tRNA pseudouridine(55) synthase) (Psi55 synthase) (tRNA pseudouridylate synthase 4) (tRNA-uridine isomerase 4)	21	0.2	2.9	13.2371	Ambiguous	Both		45.273		D.C.	1875
ETT1_YEAST	Enhancer of translation termination 1	4.6	0	2.9	104.282	Ambiguous	Nucleus		47.352		D.C.	2698
CTF18_YEAST	Chromosome transmission fidelity protein 18	0.2	4.8	2.8	0.584502	Ambiguous	Nucleus		84.373		D.C.	1897
CWC2_YEAST	Pre-mRNA-splicing factor CWC2 (Complexed with CEF1 protein 2) (PRP19-associated complex protein 40) (Synthetic lethal with CLF1 protein 3)	20	0.9	2.8	3.08812	Ambiguous	Nucleus		38.431		D.C.	2775
VHS2_YEAST	Protein VHS2 (Viable in a HAL3 SIT4 background protein 2)	20	0.6	2.8	5.10806	Ambiguous	Cytoplasm		47.961		D.C.	1592
BUD3_YEAST	Bud site selection protein 3	4.7	0.4	2.8	7.96726	Ambiguous			184.719		D.C.	662
KICH_YEAST	Choline kinase (EC 2.7.1.32)	20	0.1	2.8	22.1782	Ambiguous	Cytoplasm		66.317		D.C.	505
SNX3_YEAST	Sorting nexin-3 (Golgi retention deficient protein 19)	20	0.1	2.8	48.7484	Ambiguous	Cytoplasm		18.77		D.C.	2730
HIS8_YEAST	Histidinol-phosphate aminotransferase (EC 2.6.1.9) (Imidazole acetol-phosphate transaminase)	0.8	0	2.8	203.828	Ambiguous			42.646		D.C.	198
ERG27_YEAST	3-keto-steroid reductase (EC 1.1.1.270)	20	0.4	2.7	6.16516	Ambiguous	Cytoplasm		39.725		D.C.	2915
NOT3_YEAST	General negative regulator of transcription subunit 3	19	0.4	2.7	7.66935	Ambiguous	Both		94.403		D.C.	161
SPT8_YEAST	Transcription factor SPT8	20	0.4	2.7	7.54435	Ambiguous	Nucleus		66.19		D.C.	1398
DPOE_YEAST	DNA polymerase epsilon catalytic subunit A (EC 2.7.7.7) (DNA polymerase II subunit A)	19	0.3	2.7	9.64872	Ambiguous	Nucleus		255.671		D.C.	530
KCS1_YEAST	Inositol hexakisphosphate kinase 1 (InsP6 kinase 1) (EC 2.7.4.21) (InsP6 kinase KCS1) (PKC1 suppressor protein 1)	19	0.2	2.7	16.8888	Ambiguous	Cytoplasm		119.55		D.C.	2929
SNU13_YEAST	13 kDa ribonucleoprotein-associated protein (Small nuclear ribonucleoprotein-associated protein 1)	19	0.2	2.7	13.9581	Ambiguous	Nucleus		13.569		D.C.	1491
GET4_YEAST	Golgi to ER traffic protein 4 (Guided entry of tail-anchored proteins 4)	3.6	0.1	2.7	48.0197	Ambiguous	Cytoplasm		36.28		D.C.	2801
MPPA_YEAST	Mitochondrial-processing peptidase subunit alpha (EC 3.4.24.64) (Alpha-MPP)	6.9	0.1	2.7	20.1628	Ambiguous	Cytoplasm		53.338	MT	D.C.	336
UTP20_YEAST	U3 small nucleolar RNA-associated protein 20 (U3 snoRNA-associated protein 20) (U three protein 20)	19	1.8	2.6	1.42936	Ambiguous	Both		287.56		D.C.	1022
AIM3_YEAST	Altered inheritance of mitochondria protein 3	19	1.1	2.6	2.25199	Ambiguous	Cytoplasm		103.863		D.C.	1226
FES1_YEAST	Hsp70 nucleotide exchange factor FES1 (Factor exchange for SSA1 protein 1)	18	0	2.6	186.085	Ambiguous	Cytoplasm		32.604		D.C.	1222
HOSM_YEAST	Homocitrate synthase, mitochondrial (EC 2.3.3.14)	0.2	0	2.6	256.012	Ambiguous	Cytoplasm		48.594	MT	D.C.	2798
TWF1_YEAST	Twinfilin-1 (Twinfilin-A)	0.5	0	2.6	65.1113	Ambiguous	Cytoplasm		37.071		D.C.	2020
RMD9L_YEAST	Protein RMD9-like, mitochondrial	18	1.3	2.5	1.93037	Ambiguous	Cytoplasm		83.761	MT	D.C.	1242
VRP1_YEAST	Verprolin	18	1.3	2.5	1.89596	Ambiguous	Cytoplasm		82.594		D.C.	1137
POP7_YEAST	Ribonucleases P/MRP protein subunit POP7 (EC 3.1.26.5) (RNA-processing protein POP7) (RNases P/MRP 15.8 kDa subunit)	18	0.7	2.5	3.346	Ambiguous	Nucleus		15.814		D.C.	1235
RPD3_YEAST	Histone deacetylase RPD3 (EC 3.5.1.98) (Transcriptional regulatory protein RPD3)	18	0.7	2.5	3.71124	Ambiguous	Both		48.904		D.C.	856
RSC30_YEAST	Chromatin structure-remodeling complex protein RSC30 (Remodel the structure of chromatin complex subunit 30)	18	0.3	2.5	8.17325	Ambiguous	Nucleus		101.335		D.C.	1328
LAA1_YEAST	AP-1 accessory protein LAA1 (Large AP-1 accessory protein 1)	18	0.2	2.5	15.0996	Ambiguous	Cytoplasm		229.9		D.C.	1442
MON2_YEAST	Protein MON2	18	0.2	2.5	14.8515	Ambiguous	Cytoplasm		186.836		D.C.	1873
ETFA_YEAST	Probable electron transfer flavoprotein subunit alpha, mitochondrial (Alpha-ETF) (Altered inheritance rate of mitochondria protein 45)	0.6	0	2.5	132.2	Ambiguous	Cytoplasm		36.803	MT	D.C.	2924
KIN1_YEAST	Serine/threonine protein kinase KIN1 (EC 2.7.11.1)	17	1.5	2.4	1.58432	Ambiguous	Cytoplasm		120.071		D.C.	356
SMC2_YEAST	Structural maintenance of chromosomes protein 2 (DA-box protein SMC2)	17	0.6	2.4	4.04792	Ambiguous	Both		133.928		D.C.	1411
DEF1_YEAST	RNA polymerase II degradation factor 1 (RRM3-interacting protein 1)	0.8	0.5	2.4	5.06921	Ambiguous	Nucleus		83.973		D.C.	1034
CD123_YEAST	Cell division cycle protein 123	17	0.2	2.4	14.1688	Ambiguous	Cytoplasm		41.852		D.C.	2503
MCM16_YEAST	Central kinetochore subunit MCM16 (Minichromosome maintenance protein 16)	17	0.2	2.4	11.8553	Ambiguous	Nucleus		21.138		D.C.	2845
UBX4_YEAST	UBX domain-containing protein 4	18	0.2	2.4	16.586	Ambiguous	Both		46.965		D.C.	2166
HMO1_YEAST	High mobility group protein 1 (High spontaneous mutagenesis protein 2)	18	0.1	2.4	17.6706	Ambiguous	Nucleus		27.544		D.C.	2379
I23O_YEAST	Indoleamine 2,3-dioxygenase (IDO) (EC 1.13.11.52) (Biosynthesis of nicotinic acid protein 2)	18	0.1	2.4	20.0957	Ambiguous			50.775		D.C.	1829
RIM1_YEAST	Single-stranded DNA-binding protein RIM1, mitochondrial (Mitochondrial ssDNA-binding protein)	17	0.1	2.4	22.5535	Ambiguous	Cytoplasm	BioGrid	15.386	MT	D.C.	812
DOP1_YEAST	Protein dopey	35	0	2.4	65.4133	Ambiguous	Cytoplasm		194.688		D.C.	2376
RFA1_YEAST	Replication factor A protein 1 (RF-A protein 1) (DNA-binding protein BUF2) (Replication protein A 69 kDa DNA-binding subunit) (Single-stranded DNA-binding protein)	7.9	0	2.4	114.106	Ambiguous	Nucleus		70.348		D.C.	556
RRP41_YEAST	Exosome complex component SKI6 (Extracellular mutant protein 20) (Ribosomal RNA-processing protein 41) (Superkiller protein 6)	17	0	2.4	61.1203	Ambiguous	Both		27.561		D.C.	1770
RAD7_YEAST	DNA repair protein RAD7	17	0.5	2.3	4.92892	Ambiguous			63.777		D.C.	185
LSM6_YEAST	U6 snRNA-associated Sm-like protein LSm6	17	0.3	2.3	6.9292	Ambiguous	Both		9.398		D.C.	2562
MRC1_YEAST	Mediator of replication checkpoint protein 1 (DNA replication checkpoint mediator MRC1)	17	0.3	2.3	8.02266	Ambiguous	Nucleus		124.326		D.C.	670
MCM7_YEAST	DNA replication licensing factor MCM7 (EC 3.6.4.12) (Cell division control protein 47) (Minichromosome maintenance protein 7)	16	0.2	2.3	10.9432	Ambiguous	Both		94.943		D.C.	1172
ASF1_YEAST	Histone chaperone ASF1 (Anti-silencing function protein 1) (yASF1)	17	0	2.3	65.9361	Ambiguous	Nucleus		31.603		D.C.	813
CAF16_YEAST	CCR4-associated factor 16	16	0	2.3	220.221	Ambiguous	Both		33.09		D.C.	1720
SUCB_YEAST	Succinyl-CoA ligase [ADP-forming] subunit beta, mitochondrial (EC 6.2.1.5) (Succinyl-CoA synthetase beta chain) (SCS-beta)	16	0	2.3	53.4331	Ambiguous	Cytoplasm		46.901	MT	D.C.	2044
YL149_YEAST	Uncharacterized protein YLR149C	16	1.1	2.2	1.99544	Ambiguous			82.799		D.C.	2988
SP110_YEAST	Spindle pole body component 110 (Extragenic suppressor of CMD1-1 mutant protein 1) (Nuclear filament-related protein 1) (Spindle pole body spacer protein SPC110)	16	1	2.2	2.18364	Ambiguous	Both	BioGrid	111.782		D.C.	806
MIG1_YEAST	Regulatory protein MIG1 (Regulatory protein CAT4)	16	0.4	2.2	5.1289	Ambiguous	Nucleus		55.532		D.C.	713
UME1_YEAST	Transcriptional regulatory protein UME1 (WD repeat-containing transcriptional modulator 3)	16	0.2	2.2	13.8301	Ambiguous	Both		51.022		D.C.	2285
RSC6_YEAST	Chromatin structure-remodeling complex protein RSC6 (Remodel the structure of chromatin complex subunit 6)	16	0.1	2.2	38.5847	Ambiguous	Nucleus		54.165		D.C.	676
KEL3_YEAST	Kelch repeat-containing protein 3	16	0	2.2	52.9548	Ambiguous			75.433		D.C.	2752
RM13_YEAST	54S ribosomal protein L13, mitochondrial (YmL13)	15	1.3	2.1	1.70292	Ambiguous	Cytoplasm		30.271	MT	D.C.	2241
ESL2_YEAST	EST/SMG-like protein 1	15	0.8	2.1	2.77048	Ambiguous	Both		137.491		D.C.	1116
BRO1_YEAST	Vacuolar-sorting protein BRO1 (Amino acid sensor-independent protein 6) (BCK1-like resistance to osmotic shock protein 1) (BRO domain-containing protein 1) (Nitrogen permease inactivating protein 3) (Vacuolar protein-sorting-associated protein 31)	15	0.1	2.1	26.0413	Ambiguous	Cytoplasm		97.276		D.C.	1877
YL177_YEAST	Uncharacterized protein YLR177W	10	0.1	2.1	15.7176	Ambiguous	Cytoplasm		71.265		D.C.	2547
KIME_YEAST	Mevalonate kinase (MK) (MvK) (EC 2.7.1.36) (Ergosterol biosynthesis protein 12) (Regulation of autonomous replication protein 1)	0.9	0	2.1	148.515	Ambiguous	Cytoplasm		48.46		D.C.	220
NPT1_YEAST	Nicotinate phosphoribosyltransferase (NAPRTase) (EC 6.3.4.21)	3.7	0	2.1	187.692	Ambiguous	Both		49.019		D.C.	1450
UBA2_YEAST	Ubiquitin-activating enzyme E1-like (Polymerase-interacting protein 2) (SMT3-activating enzyme subunit 2)	15	0	2.1	67.6238	Ambiguous	Nucleus		71.259		D.C.	1926
NGR1_YEAST	Negative growth regulatory protein NGR1 (RNA-binding protein RBP1)	14	0.2	2	9.18525	Ambiguous			75.024		D.C.	909
HSE1_YEAST	Class E vacuolar protein-sorting machinery protein HSE1	14	0.1	2	39.6006	Ambiguous	Cytoplasm		51.161		D.C.	1314
NAT3_YEAST	N-terminal acetyltransferase B complex catalytic subunit NAT3 (NatB complex subunit NAT3) (EC 2.3.1.88) (NatB Nalpha terminal acetyltransferase 3)	15	0.1	2	21.3207	Ambiguous	Cytoplasm		22.921		D.C.	2576
ECM33_YEAST	Cell wall protein ECM33 (Extracellular mutant protein 33)	15	0	2	95.2388	Ambiguous	Cytoplasm		43.769	ER	D.C.	1216
VPS68_YEAST	Vacuolar protein sorting-associated protein 68	14	1.4	1.9	1.33698	Ambiguous	Cytoplasm		20.101	TM	D.C.	2760
BAP2_YEAST	Leu/Val/Ile amino-acid permease (Branched-chain amino-acid permease 2)	14	0.8	1.9	2.55505	Ambiguous	Cytoplasm		67.769	TM	D.C.	1157
CCR4_YEAST	Glucose-repressible alcohol dehydrogenase transcriptional effector (EC 3.1.13.4) (Carbon catabolite repressor protein 4) (Cytoplasmic deadenylase)	14	0.1	1.9	36.7925	Ambiguous	Both		94.67		D.C.	768
PIK1_YEAST	Phosphatidylinositol 4-kinase PIK1 (PI4-kinase) (PtdIns-4-kinase) (EC 2.7.1.67)	14	0.1	1.9	17.5965	Ambiguous	Nucleus		119.923		D.C.	1431
POP6_YEAST	Ribonucleases P/MRP protein subunit POP6 (EC 3.1.26.5) (RNA-processing protein POP6) (RNases P/MRP 18.2 kDa subunit)	14	0.1	1.9	13.6967	Ambiguous	Nucleus		18.21		D.C.	2011
UBP6_YEAST	Ubiquitin carboxyl-terminal hydrolase 6 (EC 3.4.19.12) (Deubiquitinating enzyme 6) (Ubiquitin thioesterase 6) (Ubiquitin-specific-processing protease 6)	1	0	1.9	168.841	Ambiguous			57.111		D.C.	1734
PRP5_YEAST	Pre-mRNA-processing ATP-dependent RNA helicase PRP5 (EC 3.6.4.13)	13	1.5	1.8	1.1853	Ambiguous	Nucleus		96.359		D.C.	520
CWH41_YEAST	Mannosyl-oligosaccharide glucosidase (EC 3.2.1.106) (Processing A-glucosidase I) (Glucosidase I)	13	1.4	1.8	1.31521	Ambiguous	Cytoplasm		96.507	TM	D.C.	1936
YOP1_YEAST	Protein YOP1 (YIP1 partner protein 1) (YPT-interacting protein 2)	13	0.3	1.8	5.49843	Ambiguous	Cytoplasm		20.27	TM	D.C.	2896
RDH54_YEAST	DNA repair and recombination protein RDH54 (RAD homolog 54) (Recombination factor TID1) (Two hybrid interaction with DMC1 protein 1) [Includes: DNA topoisomerase (EC 5.99.1.-); Putative helicase (EC 3.6.4.12)]	13	0.1	1.8	32.7523	Ambiguous	Nucleus		107.946		D.C.	1158
BZZ1_YEAST	Protein BZZ1 (LAS17-binding protein 7)	2.2	0	1.8	46.8594	Ambiguous	Cytoplasm		71.171		D.C.	1356
MSN4_YEAST	Zinc finger protein MSN4 (Multicopy suppressor of SNF1 protein 4)	12	1.6	1.7	1.1015	Ambiguous	Both		69.723		D.C.	973
MED18_YEAST	Mediator of RNA polymerase II transcription subunit 18 (Mediator complex subunit 18) (Suppressor of RNA polymerase B 5)	12	1.4	1.7	1.26715	Ambiguous	Nucleus		34.289		D.C.	866
ARK1_YEAST	Actin-regulating kinase 1 (EC 2.7.11.1)	12	1.1	1.7	1.45527	Ambiguous	Cytoplasm		71.373		D.C.	2158
VPS52_YEAST	Vacuolar protein sorting-associated protein 52 (Suppressor of actin mutation protein 2)	13	0.8	1.7	2.12138	Ambiguous	Cytoplasm		74.333		D.C.	1468
XRN2_YEAST	5'-3' exoribonuclease 2 (EC 3.1.13.-) (Ribonucleic acid-trafficking protein 1) (p116)	12	0.3	1.7	6.04235	Ambiguous	Nucleus		115.934		D.C.	2265
CSR1_YEAST	Phosphatidylinositol transfer protein CSR1 (CHS5 SPA2 rescue protein 1) (SEC14 homolog protein 2)	0.7	0.1	1.7	18.3268	Ambiguous	Cytoplasm		47.463		D.C.	2613
KIN28_YEAST	Serine/threonine-protein kinase KIN28 (EC 2.7.11.23)	12	0.1	1.7	11.9817	Ambiguous	Nucleus		35.247		D.C.	170
MET18_YEAST	DNA repair/transcription protein MET18/MMS19 (Methyl methanesulfonate-sensitivity protein 19)	12	0.1	1.7	28.4359	Ambiguous	Nucleus		117.883		D.C.	1596
YL225_YEAST	Uncharacterized SVF1-like protein YLR225C	12	0.1	1.7	22.3077	Ambiguous	Cytoplasm		46.423		D.C.	2515
CYC8_YEAST	General transcriptional corepressor CYC8 (Glucose repression mediator protein CYC8)	0.6	0	1.7	161.054	Ambiguous	Nucleus		107.202		D.C.	388
BOP2_YEAST	Protein BOP2 (Bypass of PAM1 protein 2)	11	1.6	1.6	0.98274	Ambiguous			66.344		D.C.	2532
YIP5_YEAST	Protein YIP5 (YPT-interacting protein 5)	11	1.1	1.6	1.43069	Ambiguous	Cytoplasm		34.843	TM	D.C.	1969
NSE3_YEAST	Non-structural maintenance of chromosome element 3 (Non-SMC element 3)	12	0.9	1.6	1.73312	Ambiguous	Both		33.965		D.C.	2490
MET7_YEAST	Cystathionine gamma-synthase (EC 2.5.1.48) (O-succinylhomoserine (thiol)-lyase) (Sulfur transfer protein 2)	12	0.4	1.6	4.00399	Ambiguous	Both		72.351		D.C.	1845
IRC5_YEAST	Uncharacterized ATP-dependent helicase IRC5 (EC 3.6.4.-) (Increased recombination centers protein 5)	11	0.3	1.6	5.54954	Ambiguous	Nucleus		96.966		D.C.	1740
ODO1_YEAST	2-oxoglutarate dehydrogenase, mitochondrial (EC 1.2.4.2) (2-oxoglutarate dehydrogenase complex component E1) (OGDC-E1) (Alpha-ketoglutarate dehydrogenase)	11	0	1.6	96.5965	Ambiguous	Cytoplasm		114.416	MT	D.C.	511
YJ41B_YEAST	Transposon Ty4-J Gag-Pol polyprotein (TY4A-TY4B) (Transposon Ty4 TYA-TYB polyprotein) [Includes: Capsid protein (CA); Ty4 protease (PR) (EC 3.4.23.-); Integrase (IN); Reverse transcriptase/ribonuclease H (RT) (RT-RH) (EC 2.7.7.49) (EC 2.7.7.7) (EC 3.1.26.4)]	7.4	13	1.5	0.123375	Ambiguous	Both		207.71		D.C.	1788
SRO7_YEAST	Lethal(2) giant larvae protein homolog SRO7 (Polarity protein SRO7) (Sodium protection protein 1) (Suppressor of RHO3 protein 7)	11	0.6	1.5	2.5591	Ambiguous	Cytoplasm		114.513		D.C.	2772
ATG3_YEAST	Autophagy-related protein 3 (Autophagy-related E2-like conjugation enzyme ATG3)	10	0.4	1.5	3.94469	Ambiguous	Cytoplasm		35.887		D.C.	1567
DUN1_YEAST	DNA damage response protein kinase DUN1 (EC 2.7.11.1)	11	0.2	1.5	6.86639	Ambiguous	Nucleus		58.633		D.C.	1419
GEA1_YEAST	ARF guanine-nucleotide exchange factor 1	11	0.2	1.5	8.20212	Ambiguous	Cytoplasm		159.437		D.C.	1815
ODP2_YEAST	Dihydrolipoyllysine-residue acetyltransferase component of pyruvate dehydrogenase complex, mitochondrial (EC 2.3.1.12) (Dihydrolipoamide acetyltransferase component of pyruvate dehydrogenase complex) (Pyruvate dehydrogenase complex component E2) (PDC-E2) (PDCE2)	11	0.1	1.5	18.8004	Ambiguous	Cytoplasm		51.818	MT	D.C.	346
OSH2_YEAST	Oxysterol-binding protein homolog 2	10	0.1	1.5	21.046	Ambiguous	Cytoplasm		145.796		D.C.	2914
ASPG1_YEAST	L-asparaginase 1 (EC 3.5.1.1) (L-asparaginase I) (L-asparagine amidohydrolase I) (ASP I)	0.2	0	1.5	151.644	Ambiguous	Cytoplasm		41.395		D.C.	1409
MDY2_YEAST	Ubiquitin-like protein MDY2 (Golgi to ER traffic protein 5) (Mating-deficient protein 2) (Translation machinery-associated protein 24)	11	0	1.5	80.3046	Ambiguous	Both		23.732		D.C.	2857
MET5_YEAST	Sulfite reductase [NADPH] subunit beta (EC 1.8.1.2) (Extracellular mutant protein 17)	11	0	1.5	117.336	Ambiguous	Cytoplasm		161.219		D.C.	1850
YL422_YEAST	DOCK-like protein YLR422W	9.8	3.5	1.4	0.392331	Ambiguous	Cytoplasm		221.563		D.C.	2565
HPC2_YEAST	Histone promoter control protein 2	10	2.4	1.4	0.59431	Ambiguous	Nucleus		67.775		D.C.	2220
UNG_YEAST	Uracil-DNA glycosylase (UDG) (EC 3.2.2.27)	10	1.6	1.4	0.864843	Ambiguous	Both		40.471	MT	D.C.	351
KAR3_YEAST	Kinesin-like protein KAR3 (Nuclear fusion protein)	10	0.8	1.4	1.69668	Ambiguous	Both		84.004		D.C.	436
DML1_YEAST	Protein DML1 (Drosophila melanogaster misato-like protein 1)	9.7	0.6	1.4	2.25488	Ambiguous	Cytoplasm		55.312		D.C.	2339
MIA40_YEAST	Mitochondrial intermembrane space import and assembly protein 40 (Mitochondrial import inner membrane translocase TIM40)	9.8	0.4	1.4	3.24339	Ambiguous	Cytoplasm		44.536	TM MT	D.C.	1061
MOT1_YEAST	TATA-binding protein-associated factor MOT1 (TBP-associated factor MOT1) (EC 3.6.4.-) (Modifier of transcription 1)	8.4	0.4	1.4	3.5317	Ambiguous	Both		209.977		D.C.	789
KIC1_YEAST	Serine/threonine-protein kinase KIC1 (EC 2.7.11.1) (Kinase that interacts with CDC31) (N-rich kinase 1)	10	0.2	1.4	8.10146	Ambiguous		BioGrid	117.062		D.C.	1285
RGD1_YEAST	RHO GTPase-activating protein RGD1 (RhoGAP) (Related GAP domain protein 1)	10	0.1	1.4	18.6077	Ambiguous	Cytoplasm		74.619		D.C.	1248
YEQ9_YEAST	Uncharacterized protein YER079W	10	0.1	1.4	13.8614	Ambiguous			23.197		D.C.	1521
HOG1_YEAST	Mitogen-activated protein kinase HOG1 (MAP kinase HOG1) (EC 2.7.11.24) (High osmolarity glycerol response protein 1)	10	0	1.4	134.915	Ambiguous	Both	BioGrid	48.858		D.C.	834
VPS33_YEAST	Vacuolar protein sorting-associated protein 33 (Protein SLP1) (Vacuolar morphogenesis protein 5)	10	0	1.4	123.422	Ambiguous	Cytoplasm		79.271		D.C.	510
TOM70_YEAST	Mitochondrial import receptor subunit TOM70 (70 kDa mitochondrial outer membrane protein) (Translocase of outer membrane 70 kDa subunit)	9.2	13	1.3	0.0961751	Ambiguous	Cytoplasm		70.123	TM	D.C.	199
PCL6_YEAST	PHO85 cyclin-6	9.7	0.7	1.3	2.02884	Ambiguous	Both		47.007		D.C.	1515
LTE1_YEAST	Guanine nucleotide exchange factor LTE1 (Low temperature essential protein 1)	9.3	0.5	1.3	2.84109	Ambiguous	Cytoplasm		163.15		D.C.	235
RRP43_YEAST	Exosome complex component RRP43 (Ribosomal RNA-processing protein 43)	9.6	0.3	1.3	4.48705	Ambiguous	Both		44.011		D.C.	637
CDT1_YEAST	Cell division cycle protein CDT1 (SIC1 indispensable protein 2) (Topoisomerase-A hypersensitive protein 11)	9.4	0.1	1.3	12.4702	Ambiguous	Both		68.405		D.C.	1820
UFD1_YEAST	Ubiquitin fusion degradation protein 1 (UB fusion protein 1) (Polymerase-interacting protein 3)	2.6	0.1	1.3	16.9613	Ambiguous			39.81		D.C.	1944
SCP1_YEAST	Transgelin (Calponin homolog 1)	9.4	0	1.3	68.2152	Ambiguous	Cytoplasm		22.748		D.C.	2731
DEP1_YEAST	Transcriptional regulatory protein DEP1	8.7	3.7	1.2	0.323684	Ambiguous	Both		46.978		D.C.	769
PTP3_YEAST	Tyrosine-protein phosphatase 3 (EC 3.1.3.48) (Protein-tyrosine phosphatase 3) (PTPase 3)	8.9	3.7	1.2	0.337222	Ambiguous	Cytoplasm		105.224		D.C.	1520
RXT3_YEAST	Transcriptional regulatory protein RXT3	8.4	0.2	1.2	6.43248	Ambiguous	Nucleus		33.812		D.C.	2635
TCA17_YEAST	TRAPP-associated protein TCA17 (17 kDa TRAPP complex-associated protein)	8.8	0.2	1.2	7.52142	Ambiguous	Cytoplasm		17.354		D.C.	881
HDA2_YEAST	HDA1 complex subunit 2 (Histone deacetylase complex 1 subunit 2)	9	0.1	1.2	10.2729	Ambiguous	Nucleus		77.059		D.C.	2594
MSH3_YEAST	DNA mismatch repair protein MSH3 (Mismatch-binding protein) (MBP) (MutS protein homolog 3)	2.9	0.1	1.2	15.3002	Ambiguous	Nucleus		116.534		D.C.	626
TRM3_YEAST	tRNA (guanosine(18)-2'-O)-methyltransferase (EC 2.1.1.34) (tRNA [Gm18] ribose methylase) (tRNA methyltransferase 3)	8.7	0	1.2	57.5802	Ambiguous	Cytoplasm		165.048		D.C.	2639
UBC3_YEAST	Ubiquitin-conjugating enzyme E2-34 kDa (EC 6.3.2.19) (Cell division control protein 34) (E3 ubiquitin ligase complex SCF subunit CDC34) (Ubiquitin carrier protein) (Ubiquitin-protein ligase)	8.3	0	1.2	26.0935	Ambiguous	Both		34.065		D.C.	376
FAB1_YEAST	1-phosphatidylinositol 3-phosphate 5-kinase FAB1 (Phosphatidylinositol 3-phosphate 5-kinase) (EC 2.7.1.150) (Type III PIP kinase) (PIPkin-III)	7.7	2.2	1.1	0.490075	Ambiguous	Cytoplasm		257.42		D.C.	1005
BNR1_YEAST	BNI1-related protein 1	7.8	0.8	1.1	1.29172	Ambiguous			156.852		D.C.	1584
PALA_YEAST	pH-response regulator protein palA/RIM20 (Regulator of IME2 protein 20)	7.8	0.4	1.1	2.59765	Ambiguous	Both		75.947		D.C.	2769
HUL5_YEAST	Probable E3 ubiquitin-protein ligase HUL5 (EC 6.3.2.-)	1.4	0.1	1.1	9.06899	Ambiguous			105.566		D.C.	1974
MDN1_YEAST	Midasin (MIDAS-containing protein) (Ribosome export/assembly protein 1)	7.8	0.1	1.1	16.1179	Ambiguous	Nucleus		559.308		D.C.	2763
STT4_YEAST	Phosphatidylinositol 4-kinase STT4 (PI4-kinase) (PtdIns-4-kinase) (EC 2.7.1.67)	0.3	0.1	1.1	12.8423	Ambiguous			214.607		D.C.	1133
CRG1_YEAST	Probable S-adenosylmethionine-dependent methyltransferase CRG1 (EC 2.1.1.-) (Cantharidin resistance protein 1)	0.2	0	1.1	69.2545	Ambiguous	Cytoplasm		33.785		D.C.	1391
DUG2_YEAST	Probable di- and tripeptidase DUG2 (EC 3.4.-.-) (Deficient in utilization of glutathione protein 2) (GSH degradosomal complex subunit DUG2)	7.6	0	1.1	45.6953	Ambiguous	Both		98.071		D.C.	1181
WDR6_YEAST	Regulator of Ty1 transposition protein 10 (Endosomal recycling protein 2) (tRNA (guanosine(34)-2'-O)-methyltransferase non-catalytic subunit TRM734)	8	0	1.1	33.9859	Ambiguous	Cytoplasm		114.461		D.C.	2738
VPS64_YEAST	Vacuolar protein sorting-associated protein 64 (Factor arrest protein 9)	7.5	2.7	1	0.381611	Ambiguous	Cytoplasm		67.284	TM	D.C.	2378
TR120_YEAST	Trafficking protein particle complex II-specific subunit 120 (TRAPP II-specific subunit 120) (Transport protein particle 120 kDa subunit)	7.4	1.1	1	0.944429	Ambiguous	Cytoplasm		147.662		D.C.	2399
ORC3_YEAST	Origin recognition complex subunit 3 (Origin recognition complex 62 kDa subunit)	7.1	14	0.99	0.0704709	Ambiguous	Nucleus		72.077		D.C.	2171
MYO3_YEAST	Myosin-3 (Actin-dependent myosin-I MYO3) (Class I unconventional myosin MYO3) (Type I myosin MYO3)	7	0.1	0.98	18.3307	Ambiguous	Cytoplasm		142.451		D.C.	1045
FYV8_YEAST	Protein FYV8 (Function required for yeast viability protein 8)	7	0.3	0.97	2.95134	Ambiguous			90.798		D.C.	1771
SIR3_YEAST	Regulatory protein SIR3 (Silent information regulator 3)	6.9	1	0.96	0.990777	Ambiguous	Nucleus		111.36		D.C.	177
ARPC5_YEAST	Actin-related protein 2/3 complex subunit 5 (Arp2/3 complex 16 kDa subunit) (p16-ARC)	6.9	0.1	0.96	11.2576	Ambiguous	Cytoplasm		17.134		D.C.	1620
FMP27_YEAST	Protein FMP27, mitochondrial (Found in mitochondrial proteome protein 27)	6.9	16	0.95	0.0585197	Ambiguous	Cytoplasm		303.479	MT	D.C.	2538
YL007_YEAST	Uncharacterized protein YLL007C	4	16	0.95	0.0585197	Ambiguous	Cytoplasm		76.622		D.C.	2654
NPL4_YEAST	Nuclear protein localization protein 4 (HMG-CoA reductase degradation protein 4)	6.8	0.1	0.95	18.035	Ambiguous	Both		65.782		D.C.	976
UBP2_YEAST	Ubiquitin carboxyl-terminal hydrolase 2 (EC 3.4.19.12) (Deubiquitinating enzyme 2) (Ubiquitin thioesterase 2) (Ubiquitin-specific-processing protease 2)	6.8	0	0.95	78.9391	Ambiguous			146.355		D.C.	2222
FDFT_YEAST	Squalene synthase (SQS) (SS) (EC 2.5.1.21) (FPP:FPP farnesyltransferase) (Farnesyl-diphosphate farnesyltransferase)	6.6	1.2	0.91	0.750191	Ambiguous	Cytoplasm		51.72	TM	D.C.	751
AIM9_YEAST	Altered inheritance of mitochondria protein 9, mitochondrial (Found in mitochondrial proteome protein 29)	6.6	0.2	0.91	6.27908	Ambiguous	Cytoplasm		72.414	MT	D.C.	1522
YG036_YEAST	Uncharacterized protein YGL036W	6.5	0.2	0.91	5.84276	Ambiguous	Cytoplasm		102.371		D.C.	1999
BIOB_YEAST	Biotin synthase, mitochondrial (EC 2.8.1.6)	6.4	15	0.89	0.0585197	Ambiguous	Cytoplasm		41.884	MT	D.C.	815
BCH2_YEAST	Protein BCH2 (BUD7 and CHS6 homolog 2)	6.2	0.7	0.86	1.21175	Ambiguous	Cytoplasm		88.044		D.C.	1093
VPS13_YEAST	Vacuolar protein sorting-associated protein 13 (Suppression of the onset of impotence protein 1) (Vacuolar protein-targeting protein 2)	6.2	0.4	0.86	2.37434	Ambiguous	Cytoplasm		357.849		D.C.	2662
YD073_YEAST	UPF0592 protein YDL073W	6.1	1	0.85	0.846584	Ambiguous			113.891		D.C.	2633
FAP1_YEAST	FKBP12-associated protein 1	6	14	0.84	0.0585197	Ambiguous	Both		108.495		D.C.	2155
APC1_YEAST	Anaphase-promoting complex subunit 1	6	1.5	0.84	0.549063	Ambiguous	Both		196.162		D.C.	2121
MTG2_YEAST	GTPase MTG2, mitochondrial (Mitochondrial GTPase 2)	6	14	0.83	0.0585197	Ambiguous	Cytoplasm		57.847	MT	D.C.	1373
VPS34_YEAST	Phosphatidylinositol 3-kinase VPS34 (PI3-kinase VPS34) (PI3K VPS34) (PtdIns-3-kinase VPS34) (EC 2.7.1.137) (Carboxypeptidase Y-deficient protein 15) (Vacuolar protein sorting-associated protein 34) (Vacuolar protein-targeting protein 29)	6	14	0.83	0.0585197	Ambiguous	Cytoplasm		100.921		D.C.	562
KKQ8_YEAST	Probable serine/threonine-protein kinase KKQ8 (EC 2.7.11.1)	6	1.9	0.83	0.429753	Ambiguous	Cytoplasm		82.59		D.C.	1044
MPH1_YEAST	ATP-dependent DNA helicase MPH1 (EC 3.6.4.12) (Mutator phenotype protein 1)	6	0.2	0.83	3.92987	Ambiguous	Nucleus		114.058		D.C.	1634
IRC21_YEAST	Increased recombination centers protein 21	6	0.1	0.83	10.1512	Ambiguous			23.182		D.C.	2459
RGD2_YEAST	Rho-GTPase-activating protein RGD2	5.9	0.8	0.82	1.08488	Ambiguous			82.209		D.C.	1715
BEM3_YEAST	GTPase-activating protein BEM3 (Bud emergence protein 3)	5.9	0.1	0.82	12.1658	Ambiguous	Cytoplasm		124.913		D.C.	921
SGT1_YEAST	Protein SGT1 (Suppressor of G2 allele of SKP1)	5.8	0.1	0.81	16.0188	Ambiguous			44.86		D.C.	2702
SLM1_YEAST	Phosphatidylinositol 4,5-bisphosphate-binding protein SLM1 (Synthetic lethal with MSS4 protein 1) (TORC2 effector protein SLM1)	5.7	2.1	0.8	0.377288	Ambiguous	Cytoplasm		77.995		D.C.	1605
RAD50_YEAST	DNA repair protein RAD50 (EC 3.6.-.-) (153 kDa protein)	5.8	0.1	0.8	12.879	Ambiguous			152.569		D.C.	348
RCY1_YEAST	Recyclin-1	5.8	0.1	0.8	8.11395	Ambiguous	Cytoplasm		97.471		D.C.	1443
YJ68_YEAST	Uncharacterized protein YJR098C	5.8	0.1	0.8	5.93662	Ambiguous	Cytoplasm		74.235		D.C.	1836
APC2_YEAST	Anaphase-promoting complex subunit 2	5.7	14	0.79	0.0585197	Ambiguous	Both		99.978		D.C.	2910
HYM1_YEAST	Protein HYM1	5.7	1.2	0.79	0.685351	Ambiguous		BioGrid	45.853		D.C.	823
MMS4_YEAST	Crossover junction endonuclease MMS4 (EC 3.1.22.-)	5.6	13	0.78	0.0585197	Ambiguous	Nucleus		78.764		D.C.	1221
CISY2_YEAST	Citrate synthase, peroxisomal (EC 2.3.3.16)	1.3	0	0.78	58.6515	Ambiguous	Cytoplasm		51.413		D.C.	249
MBP1_YEAST	Transcription factor MBP1 (MBF subunit p120)	5.4	1.2	0.75	0.61441	Ambiguous	Nucleus		93.908		D.C.	1448
SET1_YEAST	Histone-lysine N-methyltransferase, H3 lysine-4 specific (EC 2.1.1.43) (COMPASS component SET1) (Lysine N-methyltransferase 2) (SET domain-containing protein 1)	5.4	0.6	0.75	1.21916	Ambiguous	Nucleus		123.912		D.C.	1359
PPCS_YEAST	Phosphopantothenate--cysteine ligase CAB2 (EC 6.3.2.5) (Coenzyme A biosynthesis protein 2) (Phosphopantothenoylcysteine synthetase) (PPC synthetase)	0.3	0	0.75	59.3187	Ambiguous	Both		41.867		D.C.	1614
SCS2_YEAST	Vesicle-associated membrane protein-associated protein SCS2 (VAMP-associated protein SCS2) (Choline sensitivity suppressor protein 2) (VAP homolog 1)	5.4	1.1	0.74	0.689424	Ambiguous	Both		26.926	TM	D.C.	1528
RM02_YEAST	54S ribosomal protein L2, mitochondrial (YMR6) (YmL2)	5.3	13	0.73	0.0585197	Ambiguous	Cytoplasm		43.227	MT	D.C.	344
CBPS_YEAST	Carboxypeptidase S (EC 3.4.17.4) (GLY-X carboxypeptidase) (YSCS)	5.3	0.7	0.73	1.11273	Ambiguous	Cytoplasm		64.597	TM	D.C.	708
PCL7_YEAST	PHO85 cyclin-7 (PHO85-associated protein 1)	5.3	0.3	0.73	2.85615	Ambiguous	Cytoplasm		32.037		D.C.	1551
KRE6_YEAST	Beta-glucan synthesis-associated protein KRE6 (Killer toxin-resistance protein 6)	5.1	12	0.7	0.0585197	Ambiguous	Cytoplasm		80.123	TM	D.C.	835
SNT1_YEAST	Probable DNA-binding protein SNT1 (SANT domain-containing protein 1)	5	1.7	0.7	0.402764	Ambiguous	Nucleus		138.397		D.C.	636
WHI2_YEAST	Growth regulation protein	5.1	0.2	0.7	2.88939	Ambiguous			55.346		D.C.	341
ATG9_YEAST	Autophagy-related protein 9 (Cytoplasm to vacuole targeting protein 7)	5	12	0.69	0.0585197	Ambiguous	Cytoplasm		115.403	TM	D.C.	2805
YL419_YEAST	Putative ATP-dependent RNA helicase YLR419W (EC 3.6.4.13)	5	12	0.69	0.0585197	Ambiguous	Cytoplasm		163.045		D.C.	2611
DJP1_YEAST	DnaJ-like protein 1 (Peroxisome assembly protein 22)	1.5	0.1	0.69	9.46302	Ambiguous	Cytoplasm		48.575		D.C.	1636
HIR3_YEAST	Histone transcription regulator 3	2.1	30	0.67	0.0221095	Ambiguous	Nucleus		191.68		D.C.	1852
TFB1_YEAST	RNA polymerase II transcription factor B subunit 1 (General transcription and DNA repair factor IIH subunit TFB1) (TFIIH subunit TFB1) (RNA polymerase II transcription factor B 73 kDa subunit) (RNA polymerase II transcription factor B p73 subunit)	4.8	0.1	0.67	6.96665	Ambiguous	Nucleus		72.894		D.C.	899
CHL1_YEAST	ATP-dependent RNA helicase CHL1 (EC 3.6.4.13) (Chromosome loss protein 1) (Chromosome transmission fidelity protein 1)	4.8	11	0.66	0.0585197	Ambiguous	Nucleus		98.806		D.C.	560
REF2_YEAST	RNA end formation protein 2	4.8	9	0.66	0.0736014	Ambiguous	Nucleus		59.819		D.C.	1689
T2EB_YEAST	Transcription initiation factor IIE subunit beta (TFIIE-beta) (Factor A 43 kDa subunit) (Transcription factor A small subunit)	1.4	0.2	0.66	2.92489	Ambiguous	Nucleus		36.985		D.C.	1102
ABF1_YEAST	ARS-binding factor 1 (Bidirectionally acting factor 1) (DNA replication enhancer-binding protein OBF1) (SFB-B)	4.7	0	0.66	27.6517	Ambiguous	Nucleus		81.753		D.C.	371
HEM1_YEAST	5-aminolevulinate synthase, mitochondrial (EC 2.3.1.37) (5-aminolevulinic acid synthase) (Delta-ALA synthase) (Delta-aminolevulinate synthase)	4.7	0	0.65	57.5927	Ambiguous	Cytoplasm		59.362	MT	D.C.	266
PDC2_YEAST	Protein PDC2	4.7	0	0.65	22.4544	Ambiguous			103.944		D.C.	925
FIG4_YEAST	Polyphosphoinositide phosphatase (EC 3.1.3.-) (Factor-induced gene 4 protein) (Phosphatidylinositol 3,5-bisphosphate 5-phosphatase)	4.5	11	0.63	0.0585197	Ambiguous	Cytoplasm		101.746		D.C.	1692
CNS1_YEAST	Hsp70/Hsp90 co-chaperone CNS1 (Cyclophilin seven suppressor 1) (STI1 stress-inducible protein homolog)	2.2	0.4	0.63	1.44895	Ambiguous	Cytoplasm		44.112		D.C.	950
RPAC2_YEAST	DNA-directed RNA polymerases I and III subunit RPAC2 (RNA polymerases I and III subunit AC2) (AC19) (DNA-directed RNA polymerases I and III 16 kDa polypeptide) (RPA19)	4.5	0.1	0.63	12.1362	Ambiguous	Nucleus	BioGrid	16.151		D.C.	718
ARP5_YEAST	Actin-related protein 5 (Actin-like protein ARP5)	4.5	0	0.63	36.8448	Ambiguous	Nucleus		87.56		D.C.	2146
RM11_YEAST	54S ribosomal protein L11, mitochondrial (YmL11)	4.5	11	0.62	0.0585197	Ambiguous	Cytoplasm		28.515	MT	D.C.	1121
YCP4_YEAST	Flavoprotein-like protein YCP4	4.5	0.1	0.62	4.76927	Ambiguous	Cytoplasm		26.35		D.C.	633
PDS5_YEAST	Sister chromatid cohesion protein PDS5 (Precocious dissociation of sisters protein 5)	4.5	0	0.62	15.5264	Ambiguous	Nucleus		147.041		D.C.	2412
SRB8_YEAST	Mediator of RNA polymerase II transcription subunit 12 (Mediator complex subunit 12) (Suppressor of RNA polymerase B 8)	4.4	0.8	0.61	0.814906	Ambiguous	Nucleus		166.861		D.C.	681
AIM6_YEAST	Altered inheritance of mitochondria protein 6	4.4	0.8	0.6	0.743332	Ambiguous			44.383	ER	D.C.	2652
RSC9_YEAST	Chromatin structure-remodeling complex subunit RSC9 (RSC complex subunit RSC9) (Remodel the structure of chromatin complex subunit 9)	4.2	0	0.59	31.4875	Ambiguous	Nucleus		65.218		D.C.	2297
SRD1_YEAST	Pre-rRNA-processing protein SRD1 (Suppressor of rRNA-processing defect protein 1)	4.2	9.9	0.58	0.0585197	Ambiguous	Both		25.514		D.C.	251
COQ1_YEAST	Hexaprenyl pyrophosphate synthase, mitochondrial (HPS) (EC 2.5.1.-)	4.1	9.7	0.57	0.0585197	Ambiguous	Cytoplasm		52.56	MT	D.C.	461
JJJ2_YEAST	J protein JJJ2	4.1	9.7	0.57	0.0585197	Ambiguous	Both		67.389		D.C.	1780
PTK1_YEAST	Serine/threonine-protein kinase PTK1/STK1 (EC 2.7.11.1)	4.1	16	0.56	0.0353217	Ambiguous			73.502		D.C.	1042
TOS4_YEAST	Protein TOS4 (Target of SBF protein 4)	4	9.5	0.56	0.0585197	Ambiguous	Nucleus		55.468		D.C.	2550
RT07_YEAST	37S ribosomal protein S7, mitochondrial	4	9.4	0.55	0.0585197	Ambiguous	Cytoplasm		27.816	MT	D.C.	1842
VTC3_YEAST	Vacuolar transporter chaperone 3 (Phosphate metabolism protein 2)	4	1.3	0.55	0.424127	Ambiguous	Cytoplasm		96.553	TM	D.C.	2258
MAP1_YEAST	Methionine aminopeptidase 1 (MAP 1) (MetAP 1) (EC 3.4.11.18) (Peptidase M 1)	3.9	0	0.55	37.3394	Ambiguous	Cytoplasm		43.373		D.C.	2228
YG13B_YEAST	Transposon Ty1-GR3 Gag-Pol polyprotein (Gag-Pol-p199) (TY1A-TY1B) (Transposon Ty1 TYA-TYB polyprotein) (p190) [Cleaved into: Capsid protein (CA) (Gag-p45) (p54); Ty1 protease (PR) (EC 3.4.23.-) (Pol-p20) (p23); Integrase (IN) (Pol-p71) (p84) (p90); Reverse transcriptase/ribonuclease H (RT) (RT-RH) (EC 2.7.7.49) (EC 2.7.7.7) (EC 3.1.26.4) (Pol-p63) (p60)]	3.9	0.9	0.54	0.582154	Ambiguous	Both		198.56		D.C.	2868
ENT2_YEAST	Epsin-2	3.9	0	0.54	42.9175	Ambiguous	Cytoplasm		71.807		D.C.	2501
TR732_YEAST	tRNA (cytidine(32)-2'-O)-methyltransferase non-catalytic subunit TRM732	0.2	0	0.53	28.2931	Ambiguous	Cytoplasm		163.577		D.C.	2329
GYP5_YEAST	GTPase-activating protein GYP5	3.7	0	0.51	21.6648	Ambiguous	Cytoplasm		101.8		D.C.	2878
YD161_YEAST	UPF0661 TPR repeat-containing protein YDR161W	3.6	0.3	0.5	2.03976	Ambiguous	Both		42.943		D.C.	2357
HPM1_YEAST	Histidine protein methyltransferase 1 (EC 2.1.1.85) (Mitotic exit network interactor 1)	3.6	0	0.5	20.4296	Ambiguous	Both		42.515		D.C.	1601
YO352_YEAST	Uncharacterized protein YOR352W	3.6	0	0.5	12.9399	Ambiguous	Both		39.275		D.C.	2727
TAF7_YEAST	Transcription initiation factor TFIID subunit 7 (TAFII-67) (TBP-associated factor 67 kDa) (TBP-associated factor 7)	3.4	0.4	0.48	1.30975	Ambiguous	Nucleus		67.555		D.C.	2475
SSN2_YEAST	Mediator of RNA polymerase II transcription subunit 13 (Mediator complex subunit 13) (Protein SCA1) (Suppressor of RNA polymerase B SSN2)	3.4	8.1	0.47	0.0585197	Ambiguous	Nucleus		160.001		D.C.	1401
NOT4_YEAST	General negative regulator of transcription subunit 4 (Modulator of transcription 2)	3.4	8	0.47	0.0585197	Ambiguous	Both		65.354		D.C.	1009
JIP4_YEAST	Uncharacterized protein JIP4 (Jumonji-interacting protein 4)	3.4	4	0.47	0.116821	Ambiguous			98.691		D.C.	2322
RPN14_YEAST	26S proteasome regulatory subunit RPN14 (Proteasome non-ATPase subunit 14)	3.4	0.5	0.47	1.04329	Ambiguous	Both		46.383		D.C.	2002
THO2_YEAST	THO complex subunit 2 (Low dye-binding protein 5) (THO complex subunit RLR1) (Zinc-regulated gene 13 protein)	3.4	0	0.47	18.0311	Ambiguous	Nucleus		183.931		D.C.	2062
CUL3_YEAST	Cullin-3 (Cullin-B)	3.2	0.1	0.45	4.27006	Ambiguous			86.115		D.C.	2006
DNA2_YEAST	DNA replication ATP-dependent helicase/nuclease DNA2 [Includes: DNA replication nuclease DNA2 (EC 3.1.-.-); DNA replication ATP-dependent helicase DNA2 (EC 3.6.4.12)]	3.2	0.1	0.45	5.54337	Ambiguous	Nucleus		171.694		D.C.	1372
RAEP_YEAST	Rab proteins geranylgeranyltransferase component A (Rab escort protein) (REP)	3.6	0	0.45	30.8609	Ambiguous			67.374		D.C.	919
PET54_YEAST	Protein PET54 (Petite colonies protein 54)	3.2	7.6	0.44	0.0585197	Ambiguous	Cytoplasm		34.637		D.C.	316
REP2_YEAST	Partitioning protein REP2 (R2) (Protein Charlie) (Trans-acting factor C)	3.1	0.3	0.44	1.75895	Ambiguous	Nucleus		33.196		D.C.	115
CFD1_YEAST	Cytosolic Fe-S cluster assembly factor CFD1 (Cytosolic Fe-S cluster-deficient protein 1) (Ribosomal export protein 19)	3.2	0.1	0.44	6.44692	Ambiguous	Cytoplasm		31.922		D.C.	1631
SCC2_YEAST	Sister chromatid cohesion protein 2	3.1	0.2	0.43	2.81924	Ambiguous	Nucleus		171.102		D.C.	2381
UBP4_YEAST	Ubiquitin carboxyl-terminal hydrolase 4 (EC 3.4.19.12) (Deubiquitinating enzyme 4) (Ubiquitin thioesterase 4) (Ubiquitin-specific-processing protease 4) (Vacuole biogenesis protein SSV7)	3	2	0.41	0.207729	Ambiguous	Cytoplasm		105.192		D.C.	861
RSR1_YEAST	Ras-related protein RSR1	2.9	0.1	0.4	3.56822	Ambiguous	Cytoplasm		30.391		D.C.	366
INP52_YEAST	Polyphosphatidylinositol phosphatase INP52 (Synaptojanin-like protein 2) [Includes: SAC1-like phosphoinositide phosphatase (EC 3.1.3.-); Phosphatidylinositol 4,5-bisphosphate 5-phosphatase (EC 3.1.3.36)]	2.8	6.7	0.39	0.0585197	Ambiguous	Cytoplasm		133.331		D.C.	1917
SAC3_YEAST	Nuclear mRNA export protein SAC3 (Leucine permease transcriptional regulator)	2.8	6.7	0.39	0.0585197	Ambiguous	Nucleus		149.569		D.C.	1759
ATR_YEAST	Serine/threonine-protein kinase MEC1 (EC 2.7.11.1) (ATR homolog) (DNA-damage checkpoint kinase MEC1) (Mitosis entry checkpoint protein 1)	2.8	0.5	0.39	0.806011	Ambiguous	Nucleus		273.342		D.C.	1163
TRM10_YEAST	tRNA (guanine(9)-N1)-methyltransferase (EC 2.1.1.221) (tRNA methyltransferase 10) (tRNA(m1G9)-methyltransferase) (tRNA(m1G9)MTase)	2.8	0	0.39	9.80009	Ambiguous	Both		34.52		D.C.	2895
PANK_YEAST	Pantothenate kinase CAB1 (EC 2.7.1.33) (Coenzyme A biosynthesis protein 1) (Pantothenic acid kinase CAB1)	2.8	0	0.38	34.4369	Ambiguous	Both		40.903		D.C.	2433
YN8H_YEAST	Uncharacterized protein YNR029C	0.6	0.2	0.37	2.10093	Ambiguous			48.122		D.C.	2079
DUR1_YEAST	Urea amidolyase [Includes: Urea carboxylase (EC 6.3.4.6); Allophanate hydrolase (EC 3.5.1.54)]	2.7	0.1	0.37	6.4491	Ambiguous			201.832		D.C.	853
VPS27_YEAST	Vacuolar protein sorting-associated protein 27 (Golgi retention defective protein 11)	2.7	0	0.37	27.1765	Ambiguous	Cytoplasm		70.974		D.C.	1566
RPM2_YEAST	Ribonuclease P protein component, mitochondrial (RNase P) (EC 3.1.26.5)	2.6	6.2	0.36	0.0585197	Ambiguous	Cytoplasm		139.348	MT	D.C.	2263
BOP3_YEAST	Protein BOP3 (Bypass of PAM1 protein 3)	2.5	6	0.35	0.0585197	Ambiguous	Both		43.749		D.C.	2150
HAL9_YEAST	Halotolerance protein 9	0.1	9.9	0.32	0.0319642	Ambiguous	Both		117.927		D.C.	2820
RSC3_YEAST	Chromatin structure-remodeling complex protein RSC3 (Remodel the structure of chromatin complex subunit 3)	2.3	0	0.32	15.6794	Ambiguous	Nucleus		101.72		D.C.	2597
POP4_YEAST	RNases MRP/P 32.9 kDa subunit (RNA-processing protein POP4)	2.2	0.3	0.31	1.16883	Ambiguous	Nucleus		32.881		D.C.	1246
SFP1_YEAST	Transcription factor SFP1 (Split finger protein 1)	2.2	0.1	0.31	2.78624	Ambiguous	Both		74.785		D.C.	811
RCO1_YEAST	Transcriptional regulatory protein RCO1	2.2	0	0.31	8.32072	Ambiguous	Nucleus		78.836		D.C.	2461
RIB1_YEAST	GTP cyclohydrolase-2 (EC 3.5.4.25) (GTP cyclohydrolase II)	0.7	0	0.29	18.1177	Ambiguous			38.332		D.C.	1148
OAF3_YEAST	Oleate activated transcription factor 3	2	4.7	0.28	0.0585197	Ambiguous	Both		101.825		D.C.	1055
CIN8_YEAST	Kinesin-like protein CIN8 (Chromosome instability protein 8)	1.9	5.2	0.27	0.0523361	Ambiguous	Cytoplasm		113.311		D.C.	716
IPI1_YEAST	Pre-rRNA-processing protein IPI1 (Involved in processing IST2 protein 1)	1.9	0.1	0.27	4.56867	Ambiguous	Nucleus		37.867		D.C.	1341
ADR1_YEAST	Regulatory protein ADR1	1.8	0.1	0.26	3.38696	Ambiguous	Nucleus		150.941		D.C.	203
SPC97_YEAST	Spindle pole body component SPC97	1.8	0.6	0.25	0.399159	Ambiguous	Both		96.825		D.C.	1376
PSD2_YEAST	Phosphatidylserine decarboxylase proenzyme 2 (EC 4.1.1.65) [Cleaved into: Phosphatidylserine decarboxylase 2 beta chain; Phosphatidylserine decarboxylase 2 alpha chain]	1.7	4.7	0.23	0.049226	Ambiguous	Cytoplasm		130.065		D.C.	1941
YM13B_YEAST	Transposon Ty1-MR1 Gag-Pol polyprotein (Gag-Pol-p199) (TY1A-TY1B) (Transposon Ty1 TYA-TYB polyprotein) (p190) [Cleaved into: Capsid protein (CA) (Gag-p45) (p54); Ty1 protease (PR) (EC 3.4.23.-) (Pol-p20) (p23); Integrase (IN) (Pol-p71) (p84) (p90); Reverse transcriptase/ribonuclease H (RT) (RT-RH) (EC 2.7.7.49) (EC 2.7.7.7) (EC 3.1.26.4) (Pol-p63) (p60)]	1.7	1.1	0.23	0.219597	Ambiguous	Both		198.899		D.C.	2403
CBF3A_YEAST	Centromere DNA-binding protein complex CBF3 subunit A (Centromere-binding factor 2) (Chromosome transmission fidelity protein 14) (Kinetochore protein CTF14)	1.5	0.1	0.21	2.50113	Ambiguous	Both		111.917		D.C.	846
RMD9_YEAST	Protein RMD9, mitochondrial (Required for meiotic nuclear division protein 9)	1.5	0.1	0.21	3.83101	Ambiguous	Cytoplasm		74.596	MT	D.C.	1983
RGT1_YEAST	Glucose transport transcription regulator RGT1 (Restores glucose transport protein 1)	1.4	0.2	0.19	0.930385	Ambiguous	Both		128.24		D.C.	918
MSS4_YEAST	Probable phosphatidylinositol 4-phosphate 5-kinase MSS4 (EC 2.7.1.68) (1-phosphatidylinositol 4-phosphate kinase) (Diphosphoinositide kinase) (PIP5K)	1.3	0.1	0.19	1.42156	Ambiguous			89.32		D.C.	1414
ECM32_YEAST	Putative ATP-dependent RNA helicase ECM32 (EC 3.6.4.13) (DNA helicase B) (Hcs B) (DNA helicase III) (Extracellular mutant protein 32) (Helicase 1) (scHelI) (Modulator of translation termination protein 1)	1.3	3.1	0.18	0.0585197	Ambiguous	Cytoplasm		126.97		D.C.	891
RFX1_YEAST	RFX-like DNA-binding protein RFX1	1.2	1.1	0.17	0.155186	Ambiguous			90.584		D.C.	1880
IQG1_YEAST	Ras GTPase-activating-like protein IQG1 (Cytokinesis protein 1) (IQGAP-related protein 1)	1.2	0.2	0.16	0.728344	Ambiguous	Cytoplasm		172.83		D.C.	2855
ORC1_YEAST	Origin recognition complex subunit 1 (Origin recognition complex 120 kDa subunit)	1	0.1	0.14	1.96704	Ambiguous	Nucleus		104.4		D.C.	2168
TGL4_YEAST	Lipase 4 (EC 3.1.1.3) (Triacylglycerol lipase 4)	0.9	0.5	0.12	0.225605	Ambiguous	Cytoplasm		102.717	TM	D.C.	1113
SCC3_YEAST	Cohesin subunit SCC3 (Irregular cell behavior protein 1)	0.9	0	0.12	6.39846	Ambiguous	Nucleus		133.009		D.C.	1626
RIM15_YEAST	Serine/threonine-protein kinase RIM15 (EC 2.7.11.1)	0.8	0	0.11	3.80159	Ambiguous	Both		196.531		D.C.	1719
NUM1_YEAST	Nuclear migration protein NUM1	0.4	0	0.052	7.29069	Ambiguous	Other		313.033		E NB1	2202
ACBP_YEAST	Acyl-CoA-binding protein (ACBP)	0	0	0	9.29916	Ambiguous			10.061		E NB1	773
AIM46_YEAST	Altered inheritance of mitochondria protein 46, mitochondrial (Found in mitochondrial proteome protein 34)	0	0	0	1.92428	Ambiguous	Cytoplasm		34.113	MT	E NB1	1385
AKR2_YEAST	Probable palmitoyltransferase AKR2 (EC 2.3.1.225) (Ankyrin repeat-containing protein AKR2)	0	0	0	1.24553	Ambiguous	Cytoplasm		85.236	TM	E NB1	2759
ALY1_YEAST	Arrestin-related trafficking adapter 6 (Arrestin-like protein 1)	0	0	0	6.77377	Ambiguous	Cytoplasm		102.54		E NB1	1089
APA2_YEAST	5',5'''-P-1,P-4-tetraphosphate phosphorylase 2 (EC 2.7.7.53) (ATP adenylyltransferase) (Ap4A phosphorylase II) (AP,A phosphorylase) (Diadenosine 5',5'''-P1,P4-tetraphosphate phosphorylase) (AP-4-A phosphorylase)	0	0	0	1.17929	Ambiguous			36.841		E NB1	535
APN1_YEAST	DNA-(apurinic or apyrimidinic site) lyase 1 (EC 4.2.99.18) (Apurinic-apyrimidinic endonuclease 1) (AP endonuclease 1)	0	0	0	2.47523	Ambiguous	Nucleus		41.439		E NB1	568
APTH1_YEAST	Acyl-protein thioesterase 1 (EC 3.1.2.-)	0	0	0	7.41101	Ambiguous	Both		24.7		E NB1	2881
ARF3_YEAST	ADP-ribosylation factor 3	0	0	0	0.44947	Ambiguous	Cytoplasm		20.696		E NB1	1658
ARG56_YEAST	Protein ARG5,6, mitochondrial [Cleaved into: N-acetyl-gamma-glutamyl-phosphate reductase (EC 1.2.1.38) (N-acetyl-glutamate semialdehyde dehydrogenase) (NAGSA dehydrogenase); Acetylglutamate kinase (EC 2.7.2.8) (N-acetyl-L-glutamate 5-phosphotransferase) (NAG kinase) (AGK)]	0	0	0	2.8478	Ambiguous	Cytoplasm		94.869	MT	E NB1	2217
ARGD_YEAST	Acetylornithine aminotransferase, mitochondrial (ACOAT) (EC 2.6.1.11)	0	0	0	2.18668	Ambiguous	Cytoplasm		46.681	MT	E NB1	455
ARL3_YEAST	ADP-ribosylation factor-like protein 3 (Arf-like GTPase 3)	0	0	0	7.85568	Ambiguous	Cytoplasm		22.782		E NB1	2268
ASG1_YEAST	Activator of stress genes 1	0	0	0	7.30076	Ambiguous	Nucleus		108.781		E NB1	1594
ASND1_YEAST	Asparagine synthetase domain-containing protein YML096W	0	0	0	1.34072	Ambiguous	Cytoplasm		59.469		E NB1	2438
ATG10_YEAST	Ubiquitin-like-conjugating enzyme ATG10 (EC 6.3.2.-) (Autophagy-related protein 10)	0	0	0	2.68356	Ambiguous	Cytoplasm		19.76		E NB1	2663
ATG20_YEAST	Autophagy-related protein 20 (Cytoplasm to vacuole targeting protein 20) (Sorting nexin-42)	0	0	0	9.17744	Ambiguous	Cytoplasm		72.546		E NB1	2640
ATG26_YEAST	Sterol 3-beta-glucosyltransferase (EC 2.4.1.173) (Autophagy-related protein 26) (UDP-glycosyltransferase 51)	0	0	0	0.771812	Ambiguous	Cytoplasm		136.054		E NB1	2553
ATG4_YEAST	Cysteine protease ATG4 (EC 3.4.22.-) (Autophagy-related protein 4)	0	0	0	1.41836	Ambiguous	Both		55.143		E NB1	2112
ATP12_YEAST	Protein ATP12, mitochondrial	0	0	0	6.88105	Ambiguous	Cytoplasm		36.554	MT	E NB1	538
ATPD_YEAST	ATP synthase subunit delta, mitochondrial (F-ATPase delta subunit)	0	0	0	0.370882	Ambiguous	Cytoplasm		17.02	MT	E NB1	2815
BAR1_YEAST	Barrierpepsin (EC 3.4.23.35) (BAR proteinase) (Extracellular 'barrier' protein)	0	0	0	0.913297	Ambiguous	Other		63.73	ER	E NB1	343
BPH1_YEAST	Beige protein homolog 1	0	0	0	0.57748	Ambiguous	Cytoplasm		250.872		E NB1	635
BRE2_YEAST	COMPASS component BRE2 (Brefeldin-A sensitivity protein 2) (Complex proteins associated with SET1 protein BRE2) (Set1C component BRE2)	0	0	0	0.0420897	Ambiguous	Nucleus		58.347		E NB1	1709
BUD31_YEAST	Pre-mRNA-splicing factor BUD31 (Bud site selection protein 31) (Complexed with CEF1 protein 14)	0	0	0	6.25169	Ambiguous	Nucleus		18.447		E NB1	627
BUD4_YEAST	Bud site selection protein 4	0	0	0	0.666375	Ambiguous	Cytoplasm		164.486		E NB1	1833
BUD7_YEAST	Bud site selection protein 7	0	0	0	4.39943	Ambiguous	Cytoplasm		84.83		E NB1	2725
BYE1_YEAST	Transcription factor BYE1 (Bypass of ESS1 protein 1)	0	0	0	0.858601	Ambiguous	Nucleus		67.901		E NB1	1086
CALM_YEAST	Calmodulin (CaM)	0	0	0	5.95363	Ambiguous	Cytoplasm		16.135		E NB1	191
CCW12_YEAST	Covalently-linked cell wall protein 12 (Protein Alpha0.6)	0	0	0	4.52568	Ambiguous	Cytoplasm		13.058	ER	E NB1	2802
CDC13_YEAST	Cell division control protein 13	0	0	0	1.20972	Ambiguous	Other		104.904		E NB1	906
CDC31_YEAST	Cell division control protein 31 (Nuclear pore protein CDC31) (Nucleoporin CDC31)	0	0	0	2.0684	Ambiguous	Both		18.751		E NB1	178
CDC7_YEAST	Cell division control protein 7 (EC 2.7.11.1)	0	0	0	3.194	Ambiguous			58.32		E NB1	171
CEF1_YEAST	Pre-mRNA-splicing factor CEF1 (PRP nineteen-associated complex protein 85) (PRP19-associated complex protein 85)	0	0	0	0.0275113	Ambiguous	Both		67.731		E NB1	2341
CG23_YEAST	G2/mitotic-specific cyclin-3	0	0	0	0.333859	Ambiguous			49.476		E NB1	608
CHIT_YEAST	Endochitinase (EC 3.2.1.14) (Soluble cell wall protein 2)	0	0	0	9.81258	Ambiguous	Other		59.015	ER	E NB1	737
CHS6_YEAST	Chitin biosynthesis protein CHS6 (Protein CSD3)	0	0	0	1.83486	Ambiguous	Cytoplasm		86.042		E NB1	1648
CHZ1_YEAST	Histone H2A.Z-specific chaperone CHZ1	0	0	0	5.4151	Ambiguous	Nucleus		17.463		E NB1	1507
CIN1_YEAST	Chromosome instability protein 1	0	0	0	0.532662	Ambiguous			116.648		E NB1	1655
CLF1_YEAST	Pre-mRNA-splicing factor CLF1 (Crooked neck-like factor 1) (PRP19-associated complex protein 77) (Synthetic lethal with CDC40 protein 3)	0	0	0	0.459333	Ambiguous	Nucleus		82.445		E NB1	2865
CND1_YEAST	Condensin complex subunit 1 (XCAP-D2 homolog)	0	0	0	3.49706	Ambiguous	Nucleus		132.967		E NB1	2534
CND2_YEAST	Condensin complex subunit 2 (Barren homolog) (CAPH homolog)	0	0	0	1.93864	Ambiguous	Both	BioGrid	86.216		E NB1	1189
CND3_YEAST	Condensin complex subunit 3 (CAPG homolog)	0	0	0	3.85855	Ambiguous	Both		117.851		E NB1	2605
COG1_YEAST	Conserved oligomeric Golgi complex subunit 1 (COG complex subunit 1) (Complexed with DOR1 protein 3) (Component of oligomeric Golgi complex 1) (Protein SEC36)	0	0	0	0.652291	Ambiguous	Cytoplasm		48.337		E NB1	1955
COG2_YEAST	Conserved oligomeric Golgi complex subunit 2 (COG complex subunit 2) (Component of oligomeric Golgi complex 2) (Protein SEC35)	0	0	0	3.57095	Ambiguous	Cytoplasm		30.325		E NB1	2030
COX12_YEAST	Cytochrome c oxidase subunit 6B (EC 1.9.3.1) (Cytochrome c oxidase polypeptide VIb)	0	0	0	3.48504	Ambiguous	Cytoplasm		9.788		E NB1	2224
COX6_YEAST	Cytochrome c oxidase subunit 6, mitochondrial (EC 1.9.3.1) (Cytochrome c oxidase polypeptide VI)	0	0	0	0.710639	Ambiguous	Cytoplasm		17.342	MT	E NB1	67
COXM2_YEAST	COX assembly mitochondrial protein 2 (Cx9C motif-containing protein 2) (Mitochondrial metallochaperone-like protein CMC2)	0	0	0	4.46162	Ambiguous	Cytoplasm		12.947		E NB1	2964
CPD1_YEAST	2',3'-cyclic-nucleotide 3'-phosphodiesterase (CPDase) (EC 3.1.4.37)	0	0	0	5.22393	Ambiguous	Cytoplasm		26.732		E NB1	2046
CRH2_YEAST	Probable glycosidase CRH2 (EC 3.2.-.-) (Congo red hypersensitive protein 2) (Unknown transcript 2 protein)	0	0	0	2.62909	Ambiguous	Cytoplasm		49.906	ER	E NB1	884
CSN9_YEAST	COP9 signalosome complex subunit 9	0	0	0	7.76728	Ambiguous	Both		19.476		E NB1	2380
CTI6_YEAST	Histone deacetylase complex subunit CTI6 (CYC8-TUP1-interacting protein 6) (Transcriptional regulatory protein CTI6)	0	0	0	1.29516	Ambiguous	Nucleus		57.053		E NB1	2737
CTM1_YEAST	Cytochrome c lysine N-methyltransferase 1 (EC 2.1.1.59)	0	0	0	3.51727	Ambiguous	Cytoplasm		68.284		E NB1	1353
CUE2_YEAST	Ubiquitin-binding protein CUE2 (Coupling of ubiquitin conjugation to ER degradation protein 2)	0	0	0	1.11421	Ambiguous			50.874		E NB1	1071
CWC15_YEAST	Pre-mRNA-splicing factor CWC15 (Complexed with CEF1 protein 15)	0	0	0	8.74674	Ambiguous	Nucleus		19.935		E NB1	2358
CWC25_YEAST	Pre-mRNA-splicing factor CWC25 (Complexed with CEF1 protein 25)	0	0	0	6.43599	Ambiguous	Nucleus		20.374		E NB1	2104
CWC27_YEAST	Peptidyl-prolyl isomerase CWC27 (PPIase CWC27) (EC 5.2.1.8) (Complexed with CEF1 protein 27) (Rotamase CWC27)	0	0	0	1.74997	Ambiguous	Both		35.026		E NB1	2262
CYC7_YEAST	Cytochrome c iso-2	0	0	0	3.36909	Ambiguous	Cytoplasm		12.532		E NB1	61
DAL81_YEAST	Transcriptional activator protein DAL81 (Regulatory protein UGA35)	0	0	0	0.912283	Ambiguous	Nucleus		109.174		E NB1	527
DCG1_YEAST	Protein DCG1	0	0	0	3.27679	Ambiguous			27.313		E NB1	821
DCN1_YEAST	Defective in cullin neddylation protein 1	0	0	0	1.92405	Ambiguous			32.204		E NB1	2894
DOG1_YEAST	2-deoxyglucose-6-phosphate phosphatase 1 (2-DOG-6-P 1) (2-deoxyglucose-6-phosphatase 1) (EC 3.1.3.68)	0	0	0	7.04553	Ambiguous			27.1		E NB1	1325
DPOD3_YEAST	DNA polymerase delta subunit 3	0	0	0	4.712	Ambiguous	Nucleus		40.31		E NB1	1819
DRN1_YEAST	CWF19-like protein DRN1 (Debranching enzyme-associated ribonuclease 1)	0	0	0	3.76742	Ambiguous	Both		58.206		E NB1	2024
DSS4_YEAST	Protein DSS4	0	0	0	3.93471	Ambiguous			16.126		E NB1	874
DUS1_YEAST	tRNA-dihydrouridine(16/17) synthase [NAD(P)(+)] (EC 1.3.1.88) (tRNA-dihydrouridine synthase 1)	0	0	0	4.13196	Ambiguous			48.131		E NB1	2089
DYHC_YEAST	Dynein heavy chain, cytoplasmic (Dynein heavy chain, cytosolic) (DYHC)	0	0	0	0.249403	Ambiguous	Cytoplasm		471.348		E NB1	1054
EFM2_YEAST	Protein-lysine N-methyltransferase EFM2 (EC 2.1.1.-) (Elongation factor methyltransferase 2)	0	0	0	4.1609	Ambiguous	Cytoplasm		47.977		E NB1	1251
EKI1_YEAST	Ethanolamine kinase (EK) (EC 2.7.1.82)	0	0	0	0.819431	Ambiguous			61.657		E NB1	2354
ENG1_YEAST	Endo-1,3(4)-beta-glucanase 1 (Endo-1,3-beta-glucanase 1) (Endo-1,4-beta-glucanase 1) (EC 3.2.1.6) (Daughter specific expression protein 4) (Laminarinase-1)	0	0	0	1.06974	Ambiguous	Other		121.064	ER	E NB1	2087
ENV11_YEAST	Late endosome and vacuole interface protein 11	0	0	0	0.135695	Ambiguous	Nucleus		98.109		E NB1	2019
ERG2_YEAST	C-8 sterol isomerase (EC 5.-.-.-) (Delta-8--delta-7 sterol isomerase)	0	0	0	1.36772	Ambiguous	Cytoplasm		24.896	TM	E NB1	799
ERG7_YEAST	Lanosterol synthase (EC 5.4.99.7) (2,3-epoxysqualene--lanosterol cyclase) (Oxidosqualene--lanosterol cyclase) (OSC)	0	0	0	3.08484	Ambiguous	Cytoplasm		83.46		E NB1	1266
ERP2_YEAST	Protein ERP2	0	0	0	2.14377	Ambiguous	Cytoplasm		24.064	TM ER	E NB1	1453
ESC1_YEAST	Silent chromatin protein ESC1 (Establishes silent chromatin protein 1)	0	0	0	0.455579	Ambiguous	Nucleus		187.138		E NB1	2345
ESC2_YEAST	Protein ESC2 (Establishes silent chromatin protein 2)	0	0	0	1.29945	Ambiguous	Both		52.542		E NB1	2558
ESC8_YEAST	Protein ESC8 (Establishes silent chromatin protein 8)	0	0	0	0.510689	Ambiguous	Both		82.189		E NB1	2679
ESP1_YEAST	Separin (EC 3.4.22.49) (Separase)	0	0	0	0.439693	Ambiguous	Both		187.447		E NB1	2288
FABD_YEAST	Malonyl CoA-acyl carrier protein transacylase, mitochondrial (MCT) (EC 2.3.1.39) (Malonyl-CoA:ACP transferase)	0	0	0	2.57237	Ambiguous	Cytoplasm		40.707	MT	E NB1	2856
FCF1_YEAST	rRNA-processing protein FCF1 (FAF1-copurifying factor 1)	0	0	0	0.518484	Ambiguous	Nucleus		21.611		E NB1	2484
FCF2_YEAST	rRNA-processing protein FCF2 (FAF1 copurifying factor 2)	0	0	0	0.255676	Ambiguous	Nucleus		25.636		E NB1	2771
FET3_YEAST	Iron transport multicopper oxidase FET3 (EC 1.-.-.-)	0	0	0	8.22864	Ambiguous	Cytoplasm		72.36	TM ER	E NB1	1413
FHL1_YEAST	Pre-rRNA-processing protein FHL1	0	0	0	7.81198	Ambiguous	Nucleus		103.502		E NB1	1438
FMC1_YEAST	ATP synthase assembly factor FMC1, mitochondrial (Formation of mitochondrial complexes protein 1)	0	0	0	8.84973	Ambiguous	Cytoplasm		18.364	MT	E NB1	1608
FMP40_YEAST	UPF0061 protein FMP40	0	0	0	2.16936	Ambiguous	Cytoplasm		78.313		E NB1	2748
FMP46_YEAST	Putative redox protein FMP46, mitochondrial (EC 1.-.-.-) (Found in mitochondrial proteome protein 46)	0	0	0	8.4518	Ambiguous	Cytoplasm		15.65	MT	E NB1	1100
FMS1_YEAST	Polyamine oxidase FMS1 (EC 1.5.3.17) (Fenpropimorph resistance multicopy suppressor 1)	0	0	0	2.68886	Ambiguous			57.806		E NB1	1911
FOLD_YEAST	Dihydrofolate synthetase (DHFS) (EC 6.3.2.12)	0	0	0	3.92082	Ambiguous	Cytoplasm		47.851		E NB1	2950
FUB1_YEAST	Silencing boundary-establishment protein FUB1 (Function of boundary protein 1) (Proteasome inhibitor PI31-like protein FUB1)	0	0	0	7.37348	Ambiguous			26.756		E NB1	685
GAS1_YEAST	1,3-beta-glucanosyltransferase GAS1 (EC 2.4.1.-) (Glycolipid-anchored surface protein 1) (Glycoprotein GP115)	0	0	0	6.23508	Ambiguous	Cytoplasm		59.582	ER	E NB1	543
GAS3_YEAST	Probable 1,3-beta-glucanosyltransferase GAS3 (EC 2.4.1.-) (Glycolipid-anchored surface protein 3)	0	0	0	8.87938	Ambiguous	Cytoplasm		56.794	ER	E NB1	2342
GDE_YEAST	Glycogen debranching enzyme (Glycogen debrancher) [Includes: 4-alpha-glucanotransferase (EC 2.4.1.25) (Oligo-1,4-1,4-glucantransferase); Amylo-alpha-1,6-glucosidase (Amylo-1,6-glucosidase) (EC 3.2.1.33) (Dextrin 6-alpha-D-glucosidase)]	0	0	0	4.99969	Ambiguous	Cytoplasm		174.972		E NB1	2592
GLPK_YEAST	Glycerol kinase (GK) (Glycerokinase) (EC 2.7.1.30) (ATP:glycerol 3-phosphotransferase)	0	0	0	1.20176	Ambiguous			79.824		E NB1	778
GLRX2_YEAST	Glutaredoxin-2, mitochondrial (Glutathione-dependent oxidoreductase 2) (Thioltransferase)	0	0	0	3.4376	Ambiguous	Cytoplasm		15.861	MT	E NB1	446
GLRX5_YEAST	Monothiol glutaredoxin-5, mitochondrial	0	0	0	2.81089	Ambiguous	Cytoplasm		16.931	MT	E NB1	2264
[truncated: 846 more rows]

## Sheet: Extended table
		Binding to CRM1												UniProt Data						Yeast Protein Complexes	MaxQuant Output
UniProt Link	Protein description	RanGTP Stimulation	Enrichment from input	CRM1 %	Molar Fraction in CRM1+RanGTP (×10^6)	Molar Fraction in Input (×10^6)	Category	Simplified Localization	Reported CRM1 interactions	Simplified Localization	Mw (KDa)	FLAGS	Sorting	Entry	Function [CC]	Gene names	Gene names	Cross-reference (KO)	Cross-reference (GeneTree)	Complex_ID	Input percentage (%100)	Mol. weight [kDa]	iBAQ CRM1 w/o Ran	iBAQ CRM1+RanGTP	iBAQ Input	RanGTP Stimulation	Input Enrichement Factor	id
RNA1_YEAST	Ran GTPase-activating protein 1 (Protein involved in RNA production/processing)	250	140	5.8	58000	418.915	Cargo A	Cytoplasm	BioGrid	Cytoplasm	45.816		A1	P11745	GTPase activator for the nuclear Ras-related regulatory protein GSP1 (Ran), converting it to the putatively inactive GDP-bound state.	RNA1	RNA1	K14319;	ENSGT00440000039203;	460_Complex 460;	0.0418915	45.815	44017000	12872000000	536890000	292.432	139.558	333
IF2G_YEAST	Eukaryotic translation initiation factor 2 subunit gamma (eIF-2-gamma)	550	48	3.1	31000	642.991	Cargo A				57.866		A1	P32481	eIF-2 functions in the early steps of protein synthesis by forming a ternary complex with GTP and initiator tRNA. This complex binds to a 40S ribosomal subunit, followed by mRNA binding to form a 43S preinitiation complex. Junction of the 60S ribosomal subunit to form the 80S initiation complex is preceded by hydrolysis of the GTP bound to eIF-2 and release of an eIF-2-GDP binary complex. In orde…	GCD11	GCD11	K03242;	ENSGT00550000074801;	287_Translation initiation factor eIF2B complex ;	0.0642991	57.865	10609000	6856900000	824070000	646.329	48.4349	833
IF2B_YEAST	Eukaryotic translation initiation factor 2 subunit beta (eIF-2-beta)	640	120	2.7	27000	228.515	Cargo A				31.574		A1	P09064	eIF-2 functions in the early steps of protein synthesis by forming a ternary complex with GTP and initiator tRNA. This complex binds to a 40S ribosomal subunit, followed by mRNA binding to form a 43S preinitiation complex. Junction of the 60S ribosomal subunit to form the 80S initiation complex is preceded by hydrolysis of the GTP bound to eIF-2 and release of an eIF-2-GDP binary complex. In orde…	SUI3	SUI3	K03238;	ENSGT00390000001804;		0.0228515	31.574	8026500	6058900000	292870000	754.862	120.424	253
IF2A_YEAST	Eukaryotic translation initiation factor 2 subunit alpha (eIF-2-alpha)	580	130	2.6	26000	197.617	Cargo A				34.718		A1	P20459	eIF-2 functions in the early steps of protein synthesis by forming a ternary complex with GTP and initiator tRNA. This complex binds to a 40S ribosomal subunit, followed by mRNA binding to form a 43S preinitiation complex. Junction of the 60S ribosomal subunit to form the 80S initiation complex is preceded by hydrolysis of the GTP bound to eIF-2 and release of an eIF-2-GDP binary complex. In orde…	SUI2	SUI2	K03237;	ENSGT00390000007015;		0.0197617	34.717	8643300	5856200000	253270000	677.542	134.594	503
PABP_YEAST	Polyadenylate-binding protein, cytoplasmic and nuclear (PABP) (Poly(A)-binding protein) (ARS consensus-binding protein ACBP-67) (Polyadenylate tail-binding protein)	120	23	2.2	22000	955.119	Cargo A	Both	BioGrid	Both	64.344		A1	P04147	Binds the poly(A) tail of mRNA. Appears to be an important mediator of the multiple roles of the poly(A) tail in mRNA biogenesis, stability and translation. In the nucleus, interacts with the nuclear cleavage factor IA (CFIA), which is required for both mRNA cleavage and polyadenylation. Is also required for efficient mRNA export to the cytoplasm. Acts in concert with a poly(A)-specific nuclease …	PAB1	PAB1	K13126;	ENSGT00760000118913;	119_Complex 119;299_Complex 299;377_Complex 377;388_Pab1/Pan2/Pan3 complex;	0.0955119	64.343	34740000	4876400000	1224100000	140.368	23.1887	123
GPD2_YEAST	Glycerol-3-phosphate dehydrogenase [NAD(+)] 2, mitochondrial (EC 1.1.1.8)	27000	150	1.7	17000	117.515	Cargo A	Cytoplasm		Cytoplasm	49.422	MT	A1	P41911	Catalyzes the production of glycerol under anaerobic growth conditions. Glycerol production serves as a redox sink by consuming the excess cytosolic NADH during anaerobic metabolism. {ECO:0000269|PubMed:8979347}.	GPD2	GPD2	K00006;	ENSGT00390000003114;		0.0117515	49.421	122690	3831800000	150610000	31231.6	148.096	1685
SSBP1_YEAST	Single-stranded nucleic acid-binding protein	170	39	1.1	11000	287.488	Cargo A	Both	BioGrid	Both	32.99		A1	P10080	Functions in the transition of mRNAs from translation to an mRNP complex destined for decapping. High-copy-number suppressor of decapping defects. Overexpression suppresses decapping defects in both DCP1-2 and DCP2-7 mutations. Acts to promote translational repression of mRNA in conjunction with DHH1 and subsequent mRNA localization to P bodies. Promotes translational repression of mRNA during gl…	SBP1	SBP1		ENSGT00530000067047;	67_Pab1/eIF4G/eIF4E complex ;425_Complex 425;	0.0287488	32.989	12323000	2461600000	368450000	199.757	38.8896	305
RS3_YEAST	40S ribosomal protein S3 (RP13) (YS3)	200	7	1	10000	1471.03	Cargo A	Cytoplasm		Cytoplasm	26.503		A1	P05750		RPS3	RPS3	K02985;	ENSGT00390000008610;		0.147103	26.502	9782900	2265000000	1885300000	231.526	6.9933	154
EIF3J_YEAST	Eukaryotic translation initiation factor 3 subunit J (eIF3j) (Eukaryotic translation initiation factor 3 30 kDa subunit) (eIF-3 30 kDa)	450	50	0.61	6100	121.253	Cargo A	Cytoplasm		Cytoplasm	29.564		A1	Q05775	Probable component of the eukaryotic translation initiation factor 3 (eIF-3) complex, which is involved in protein synthesis and, together with other initiation factors, stimulates binding of mRNA and methionyl-tRNAi to the 40S ribosome.	HCR1	HCR1	K03245;		45_Translation initiation factor eIF3 complex;	0.0121253	29.564	2542000	1339400000	155400000	526.908	50.1711	2499
RS7A_YEAST	40S ribosomal protein S7-A (RP30) (RP40)	300	5.5	0.59	5900	1060.84	Cargo A	Both		Both	21.622		A1	P26786	Involved in nucleolar processing of pre-18S ribosomal RNA and ribosome assembly. {ECO:0000269|PubMed:15590835}.	RPS7A	RPS7A	K02993;	ENSGT00390000014122;	431_Complex 431;	0.106084	21.622	3681500	1294600000	1359600000	351.65	5.54267	700
RTG2_YEAST	Retrograde regulation protein 2	8300	71	0.58	5800	81.9743	Cargo A				65.572		A1	P32608	Required for a novel path of interorganelle communication between mitochondria, peroxisomes and the nucleus, thereby maintaining a functional metabolic interaction between the tricarboxylic acid and glyoxylate cycles. In particular, required for the retrograde expression of the peroxisomal isoform of citrate synthase, CIT2.	RTG2	RTG2	K11369;		356_Rtg2/Mks1 complex;	0.00819743	65.571	130530	1281000000	105060000	9813.84	70.9751	879
RS5_YEAST	40S ribosomal protein S5 (RP14) (S2) (YS8)	150	3.7	0.56	5600	1505.13	Cargo A	Cytoplasm		Cytoplasm	25.039		A1	P26783		RPS5	RPS5	K02989;	ENSGT00390000010806;	116_Complex 116;451_Complex 451;	0.150513	25.038	6921500	1242700000	1929000000	179.542	3.74998	697
EI2BA_YEAST	Translation initiation factor eIF-2B subunit alpha (GCD complex subunit GCN3) (Guanine nucleotide exchange factor subunit GCN3) (Transcriptional activator GCN3) (eIF-2B GDP-GTP exchange factor subunit alpha)	2000	58	0.52	5200	90.1593	Cargo A				34.025		A1	P14741	Acts as a non-essential regulatory component of the translation initiation factor 2B (eIF2-B or GCD complex), which catalyzes the exchange of eukaryotic initiation factor 2 (eIF-2)-bound GDP for GTP and is regulated by phosphorylated eIF-2. It activates the synthesis of GCN4 in yeast under amino acid starvation conditions by suppressing the inhibitory effects of multiple AUG codons present in the…	GCN3	GCN3	K03239;	ENSGT00550000074853;	287_Translation initiation factor eIF2B complex ;	0.00901593	34.025	477560	1150800000	115550000	2409.75	57.9728	379
GGA2_YEAST	ADP-ribosylation factor-binding protein GGA2 (Golgi-localized, gamma ear-containing, ARF-binding protein 2)	160	12	0.5	5000	406.056	Cargo A	Cytoplasm	BioGrid	Cytoplasm	64.347		A1	P38817	May play a role in the regulation of membrane traffic through the trans-Golgi network. {ECO:0000269|PubMed:10747088, ECO:0000269|PubMed:11124697}.	GGA2	GGA2		ENSGT00700000104396;		0.0406056	64.346	5698300	1098100000	520410000	192.707	12.2826	1352
DCP1_YEAST	mRNA-decapping enzyme subunit 1	35000	130	0.48	4800	36.3813	Cargo A	Cytoplasm	BioGrid	Cytoplasm	26.266		A1	Q12517	Component of the decapping complex necessary for the degradation of mRNAs, both in normal mRNA turnover and in nonsense-mediated mRNA decay. Removes the 7-methyl guanine cap structure from mRNA molecules, yielding a 5'-phosphorylated mRNA fragment and 7m-GDP. Decapping is the major pathway of mRNA degradation in yeast. It occurs through deadenylation, decapping and subsequent 5' to 3' exonucleoly…	DCP1	DCP1	K12612;		31_mRNA decapping complex;	0.00363813	26.266	26000	1069300000	46627000	41126.9	133.492	2942
TPM1_YEAST	Tropomyosin-1	830	20	0.48	4800	245.603	Cargo A	Cytoplasm		Cytoplasm	23.541		A1	P17536		TPM1	TPM1	K17945;	ENSGT00730000113677;		0.0245603	23.54	1094300	1068000000	314770000	975.966	19.7502	442
RS11B_YEAST	40S ribosomal protein S11-B (RP41) (S18) (YS12)	310	7.5	0.48	4800	645.503	Cargo A	Cytoplasm		Cytoplasm	17.749		A1	P0CX48		RPS11B;RPS11A	RPS11B;RPS11A	K02949;	ENSGT00390000002732;	368_Complex 368;	0.0645503	17.749	2972700	1068900000	827290000	359.572	7.52097	296
EIF3I_YEAST	Eukaryotic translation initiation factor 3 subunit I (eIF3i) (Eukaryotic translation initiation factor 3 39 kDa subunit) (eIF-3 39 kDa subunit) (eIF3 p39)	170	16	0.46	4600	296.344	Cargo A	Cytoplasm		Cytoplasm	38.755		A1	P40217	Component of the eukaryotic translation initiation factor 3 (eIF-3) complex, which is involved in protein synthesis and, together with other initiation factors, stimulates binding of mRNA and methionyl-tRNAi to the 40S ribosome.	TIF34	TIF34	K03246;	ENSGT00630000089849;	45_Translation initiation factor eIF3 complex;	0.0296344	38.755	5122300	1026800000	379800000	200.457	15.7371	1558
EI2BB_YEAST	Translation initiation factor eIF-2B subunit beta (GCD complex subunit GCD7) (Guanine nucleotide exchange factor subunit GCD7) (eIF-2B GDP-GTP exchange factor subunit beta)	980	100	0.45	4500	43.264	Cargo A				42.57		A1	P32502	Acts as a regulatory component of the translation initiation factor 2B (eIF2-B or GCD complex), which catalyzes the exchange of eukaryotic initiation factor 2 (eIF-2)-bound GDP for GTP and is regulated by phosphorylated eIF-2. It activates the synthesis of GCN4 in yeast under amino acid starvation conditions by suppressing the inhibitory effects of multiple AUG codons present in the leader of GCN…	GCD7	GCD7	K03754;	ENSGT00550000074908;	287_Translation initiation factor eIF2B complex ;	0.0043264	42.569	859180	987530000	55448000	1149.39	103.671	845
PP12_YEAST	Serine/threonine-protein phosphatase PP1-2 (EC 3.1.3.16)	220	12	0.41	4100	344.338	Cargo A	Both		Both	35.907		A1	P32598	Involved in control of glycogen metabolism, meiosis, translation, chromosome segregation, cell polarity and G2/M cell cycle progression. PP1 may act in opposition to the IPL1 protein kinase in regulating chromosome segregation by dephosphorylating H3S10ph. The BUD14-GLC7 complex is necessary to regulate microtubule dynamics at the cortex and may function as a specific activator of the dynein comp…	GLC7	GLC7	K06269;	ENSGT00530000062911;	79_Protein phosphatase 1 complex ;	0.0344338	35.907	3553900	911710000	441310000	256.538	12.0256	872
EI2BD_YEAST	Translation initiation factor eIF-2B subunit delta (GCD complex subunit GCD2) (Guanine nucleotide exchange factor subunit GCD2) (eIF-2B GDP-GTP exchange factor subunit delta)	1600	38	0.4	4000	105.757	Cargo A				70.852		A1	P12754	Acts as essential component of the translation initiation factor 2B (eIF2-B or GCD complex), which catalyzes the exchange of eukaryotic initiation factor 2 (eIF-2)-bound GDP for GTP and is regulated by phosphorylated eIF-2. It activates the synthesis of GCN4 in yeast under amino acid starvation conditions by suppressing the inhibitory effects of multiple AUG codons present in the leader of GCN4 m…	GCD2	GCD2	K03680;	ENSGT00550000075009;	287_Translation initiation factor eIF2B complex ;	0.0105757	70.851	462030	873560000	135540000	1890.7	37.5163	349
RS9B_YEAST	40S ribosomal protein S9-B (RP21) (S13) (YP28) (YS11)	390	8.7	0.4	4000	464.716	Cargo A	Both		Both	22.299		A1	P05755	Involved in nucleolar processing of pre-18S ribosomal RNA and ribosome assembly. {ECO:0000269|PubMed:15590835}.	RPS9B	RPS9B	K02997;	ENSGT00550000074829;	361_Complex 361;	0.0464716	22.298	1919600	889320000	595590000	463.284	8.69171	155
ENP1_YEAST	Essential nuclear protein 1	3400	79	0.38	3800	47.7926	Cargo A	Both		Both	55.137		A1	P38333	Required for normal export of the pre-40S particles from the nucleus to the cytoplasm. Its subcellular location and association with pre-40S subunit shifts from mixed cytoplasm/nucleus to all nuclear in RPS19 disruptions, suggesting it acts after the ribosomal protein. {ECO:0000269|PubMed:12628929, ECO:0000269|PubMed:16159874}.	ENP1	ENP1	K14797;	ENSGT00390000007241;	354_Complex 354;	0.00477926	55.136	209960	834310000	61252000	3973.66	79.287	1244
FSH3_YEAST	Family of serine hydrolases 3 (EC 3.1.-.-)	440	27	0.37	3700	134.4	Cargo A				30.418		A1	Q99369	Serine hydrolase of unknown specificity. {ECO:0000269|PubMed:14645503}.	FSH3	FSH3		ENSGT00730000113940;		0.01344	30.418	1565100	807550000	172250000	515.973	27.2901	2992
EDC3_YEAST	Enhancer of mRNA-decapping protein 3	25000	97	0.35	3500	35.8133	Cargo A	Cytoplasm		Cytoplasm	61.34		A1	P39998	Stimulates decapping of both stable and unstable mRNA during mRNA decay. Does not affect nonsense-mediated mRNA decay. Required for normal P-body assembly. {ECO:0000269|PubMed:15020463, ECO:0000269|PubMed:18678652}.	EDC3	EDC3	K12615;		31_mRNA decapping complex;	0.00358133	61.339	26000	765390000	45899000	29438.1	97.0676	1495
EIF3G_YEAST	Eukaryotic translation initiation factor 3 subunit G (eIF3g) (Eukaryotic translation initiation factor 3 RNA-binding subunit) (eIF-3 RNA-binding subunit) (Translation initiation factor eIF3 p33 subunit) (eIF3 p33)	230	9	0.34	3400	380.745	Cargo A	Cytoplasm		Cytoplasm	30.501		A1	Q04067	Component of the eukaryotic translation initiation factor 3 (eIF-3) complex, which is involved in protein synthesis and, together with other initiation factors, stimulates binding of mRNA and methionyl-tRNAi to the 40S ribosome. TIF35 binds to mRNA and rRNA. Binds to the 18S rRNA but non-specifically. {ECO:0000269|PubMed:10085088}.	TIF35	TIF35	K03248;	ENSGT00510000047802;	45_Translation initiation factor eIF3 complex;	0.0380745	30.501	2830400	753740000	487970000	266.302	8.99131	2389
SMI1_YEAST	Cell wall assembly regulator SMI1 (Killer toxin-resistance protein 4)	2500	130	0.33	3300	25.1603	Cargo A	Nucleus		Nucleus	57.079		A1	P32566	Protein involved in the regulation of cell wall assembly and 1,3-beta-glucan synthesis, possibly through the transcriptional regulation of cell wall glucan and chitin synthesis. {ECO:0000269|PubMed:10206705, ECO:0000269|PubMed:8289782}.	SMI1	SMI1				0.00251603	57.079	251100	729470000	32246000	2905.1	131.682	858
LTV1_YEAST	Protein LTV1 (Low-temperature viability protein 1)	880	160	0.32	3200	20.3937	Cargo A	Both	NESdb, BioGrid	Both	53.39		A1	P34078	Involved in protein transport. Non-ribosomal factor required for efficient nuclear export of the ribosomal 40S subunit. Component of the GSE complex, a GTPase complex required for intracellular sorting of GAP1 out of the endosome. {ECO:0000269|PubMed:15611164, ECO:0000269|PubMed:16888326}.	LTV1	LTV1	K14798;		58_Complex 58;489_Complex 489;	0.00203937	53.39	686430	710750000	26137000	1035.43	158.291	981
YSC84_YEAST	Protein YSC84 (LAS seventeen-binding protein 4) (LAS17-binding protein 4)	290	380	0.31	3100	8.37533	Cargo A	Cytoplasm	BioGrid	Cytoplasm	50.902		A1	P32793	Essential for the organization of the actin cytoskeleton, fluid phase endocytosis and vesicle trafficking, together with LSB5. {ECO:0000269|PubMed:12388763}.	YSC84	YSC84		ENSGT00510000048137;		0.000837533	50.901	2052100	694590000	10734000	338.478	376.67	904
DCP2_YEAST	mRNA-decapping enzyme subunit 2 (EC 3.-.-.-) (Protein PSU1)	7900	69	0.3	3000	44.2151	Cargo A	Cytoplasm	BioGrid	Cytoplasm	108.667		A1	P53550	Catalytic component of the decapping complex necessary for the degradation of mRNAs, both in normal mRNA turnover and in nonsense-mediated mRNA decay. Removes the 7-methyl guanine cap structure from mRNA molecules, yielding a 5'-phosphorylated mRNA fragment and 7m-GDP. Decapping is the major pathway of mRNA degradation in yeast. It occurs through deadenylation, decapping and subsequent 5' to 3' e…	DCP2	DCP2	K12613;	ENSGT00390000018878;	31_mRNA decapping complex;	0.00442151	108.67	71936	672750000	56667000	9352.06	69.1064	2060
EI2BE_YEAST	Translation initiation factor eIF-2B subunit epsilon (GCD complex subunit GCD6) (Guanine nucleotide exchange factor subunit GCD6) (eIF-2B GDP-GTP exchange factor subunit epsilon)	490	33	0.3	3000	91.7198	Cargo A				81.161		A1	P32501	Acts as a catalytic component of the translation initiation factor 2B (eIF2-B or GCD complex), which catalyzes the exchange of eukaryotic initiation factor 2 (eIF-2)-bound GDP for GTP and is regulated by phosphorylated eIF-2. It activates the synthesis of GCN4 in yeast under amino acid starvation conditions by suppressing the inhibitory effects of multiple AUG codons present in the leader of GCN4…	GCD6	GCD6	K03240;	ENSGT00510000047568;	287_Translation initiation factor eIF2B complex ;	0.00917198	81.16	1172500	672750000	117550000	573.774	33.3139	844
OCA1_YEAST	Putative tyrosine-protein phosphatase OCA1 (EC 3.1.3.48) (Oxidant-induced cell-cycle arrest protein 1)	1100	26	0.3	3000	113.606	Cargo A	Cytoplasm		Cytoplasm	27.205		A1	P50946	Putative tyrosine-protein phosphatase required for protection against superoxide stress. Involved in cell-cycle delay in response to linoleic acid hydroperoxide (LoaOOH). {ECO:0000269|PubMed:11408586, ECO:0000269|PubMed:12912987, ECO:0000269|PubMed:18205808}.	OCA1	OCA1	K18043;	ENSGT00530000066535;	490_Complex 490;	0.0113606	27.205	511200	655340000	145600000	1281.96	26.1999	1918
RS14B_YEAST	40S ribosomal protein S14-B (RP59B)	340	3	0.3	3000	1016.99	Cargo A	Both		Both	14.65		A1	P39516	Involved in nucleolar processing of pre-18S ribosomal RNA and ribosome assembly. {ECO:0000269|PubMed:15590835}.	RPS14B	RPS14B	K02955;	ENSGT00390000000703;		0.101699	14.65	1686000	673220000	1303400000	399.3	3.00659	1435
ELP6_YEAST	Elongator complex protein 6 (Gamma-toxin target 6) (HAT-associated protein 3)	420	24	0.29	2900	123.804	Cargo A	Both		Both	30.574		A1	Q04868	Acts as component of the RNA polymerase II elongator complex, which is a major histone acetyltransferase component of the RNA polymerase II (RNAPII) holoenzyme and is involved in transcriptional elongation. Association with elongating RNAPII requires a hyperphosphorylated state of the RNAPII C-terminal domain (CTD). Elongator binds to both naked and nucleosomal DNA, can acetylate both core and nu…	ELP6	ELP6	K11377;			0.0123804	30.573	1307500	648310000	158670000	495.839	23.7839	2466
RS13_YEAST	40S ribosomal protein S13 (S27a) (YS15)	21000	4.9	0.29	2900	600.256	Cargo A	Cytoplasm		Cytoplasm	17.029		A1	P05756		RPS13	RPS13	K02953;	ENSGT00390000017491;		0.0600256	17.029	26000	643650000	769300000	24755.8	4.87022	156
EI2BG_YEAST	Translation initiation factor eIF-2B subunit gamma (GCD complex subunit GCD1) (Guanine nucleotide exchange factor subunit GCD1) (eIF-2B GDP-GTP exchange factor subunit gamma)	350	52	0.26	2600	49.0262	Cargo A				65.7		A1	P09032	Acts as essential component of the translation initiation factor 2B (eIF2-B or GCD complex), which catalyzes the exchange of eukaryotic initiation factor 2 (eIF-2)-bound GDP for GTP and is regulated by phosphorylated eIF-2. It activates the synthesis of GCN4 in yeast under amino acid starvation conditions by suppressing the inhibitory effects of multiple AUG codons present in the leader of GCN4 m…	GCD1	GCD1	K03241;	ENSGT00510000047486;	287_Translation initiation factor eIF2B complex ;	0.00490262	65.699	1377300	566240000	62833000	411.123	52.4575	252
RS6B_YEAST	40S ribosomal protein S6-B (RP9) (S10) (YS4)	610	6.2	0.26	2600	419.875	Cargo A	Both		Both	26.996		A1	P0CX38	Involved in nucleolar processing of pre-18S ribosomal RNA and ribosome assembly. {ECO:0000269|PubMed:15590835}.	RPS6B;RPS6A	RPS6B;RPS6A	K02991;	ENSGT00390000009819;	150_Complex 150;176_Complex 176;291_Complex 291;	0.0419875	26.996	798320	576550000	538120000	722.204	6.23666	291
YPK1_YEAST	Serine/threonine-protein kinase YPK1 (EC 2.7.11.1) (Sphingosine-like immunosuppressant resistant protein 2) (Yeast protein kinase 1)	1200	25	0.25	2500	99.897	Cargo A	Cytoplasm		Cytoplasm	76.48		A1	P12688	Plays an essential role in the proliferation of yeast cells. Involved in a signaling pathway, required for optimal cell wall integrity, that acts in parallel with the PKC1-SLT2-dependent pathway. Downstream kinase in the sphingolipid-mediated signaling pathway. Its phosphorylation is regulated by the intracellular sphingolipid concentration. Cooperates with SLI1 in mediating resistance to the sph…	YPK1	YPK1	K13303;	ENSGT00770000120449;		0.0099897	76.479	380570	556320000	128030000	1461.81	25.2934	345
EIF3B_YEAST	Eukaryotic translation initiation factor 3 subunit B (eIF3b) (Cell cycle regulation and translation initiation protein) (Eukaryotic translation initiation factor 3 90 kDa subunit) (eIF3 p90) (Translation initiation factor eIF3 p90 subunit)	240	7.2	0.25	2500	344.954	Cargo A	Cytoplasm		Cytoplasm	88.13		A1	P06103	Component of the eukaryotic translation initiation factor 3 (eIF-3) complex, which is involved in protein synthesis and, together with other initiation factors, stimulates binding of mRNA and methionyl-tRNAi to the 40S ribosome. {ECO:0000255|HAMAP-Rule:MF_03001, ECO:0000269|PubMed:11387228}.	PRT1	PRT1	K03253;	ENSGT00550000074913;	45_Translation initiation factor eIF3 complex;	0.0344954	88.129	1922700	550150000	442100000	286.134	7.24361	162
SPT5_YEAST	Transcription elongation factor SPT5 (Chromatin elongation factor SPT5)	430	24	0.24	2400	100.279	Cargo A	Both		Both	115.65		A1	P27692	The SPT4-SPT5 complex mediates both activation and inhibition of transcription elongation, and plays a role in pre-mRNA processing. This complex seems to be important for the stability of the RNA polymerase II elongation machinery on the chromatin template but not for the inherent ability of this machinery to translocate down the gene. {ECO:0000269|PubMed:12554661, ECO:0000269|PubMed:12556496, EC…	SPT5	SPT5	K15172;	ENSGT00440000037640;		0.0100279	115.65	1044900	524730000	128520000	502.182	23.7662	712
EIF3C_YEAST	Eukaryotic translation initiation factor 3 subunit C (eIF3c) (Eukaryotic translation initiation factor 3 93 kDa subunit) (eIF3 p93) (Nuclear transport protein NIP1) (Translation initiation factor eIF3, p93 subunit)	420	5.7	0.24	2400	423.667	Cargo A	Cytoplasm		Cytoplasm	93.204		A1	P32497	Component of the eukaryotic translation initiation factor 3 (eIF-3) complex, which is involved in protein synthesis and, together with other initiation factors, stimulates binding of mRNA and methionyl-tRNAi to the 40S ribosome. {ECO:0000255|HAMAP-Rule:MF_03002, ECO:0000269|PubMed:12651896}.	NIP1	NIP1	K03252;	ENSGT00390000017900;	45_Translation initiation factor eIF3 complex;	0.0423667	93.203	1081600	529090000	542980000	489.173	5.67205	842
RS4B_YEAST	40S ribosomal protein S4-B (RP5) (S7) (YS6)	240	3.4	0.24	2400	692.358	Cargo A	Cytoplasm		Cytoplasm	29.41		A1	P0CX36		RPS4B;RPS4A	RPS4B;RPS4A	K02987;	ENSGT00390000005569;		0.0692358	29.41	1842200	523500000	887340000	284.171	3.43417	290
PSP2_YEAST	Protein PSP2 (Mitochondrial regulator of splicing 15) (Polymerase suppressor protein 2)	350	130	0.23	2300	17.63	Cargo A	Cytoplasm		Cytoplasm	65.584		A1	P50109	DNA polymerase alpha mutation suppressor. Suppressor of group II intron splicing defects of a mutation in MRS2. May play a role in mitochondrial mRNA splicing. {ECO:0000269|PubMed:8252639, ECO:0000269|PubMed:9529527}.	PSP2	PSP2				0.001763	65.583	1263700	518720000	22595000	410.477	133.633	1908
ENT3_YEAST	Epsin-3	250	19	0.23	2300	120.746	Cargo A	Cytoplasm		Cytoplasm	45.091		A1	P47160	Involved in the recruitment of clathrin to the Golgi network and endosomes to form clathrin coated vesicles. Plays a role in the trafficking of clathrin between the Golgi network and endosomes. Binds to membranes enriched in phosphatidylinositol-3,5-bisphosphate (PtdIns(3,5)P2) and, in association with VPS27, is involved in protein sorting at the multivesicular body (MVB). {ECO:0000269|PubMed:124…	ENT3	ENT3		ENSGT00550000074611;		0.0120746	45.091	1728800	513300000	154750000	296.911	19.3079	1844
RS3A2_YEAST	40S ribosomal protein S1-B (RP10B)	600	3.3	0.23	2300	710.928	Cargo A	Cytoplasm		Cytoplasm	28.812		A1	P23248		RPS1B	RPS1B	K02984;	ENSGT00390000018433;	255_Complex 255;369_Complex 369;	0.0710928	28.812	726570	517190000	911140000	711.824	3.30415	573
OCA4_YEAST	Protein OCA4 (Oxidant-induced cell-cycle arrest protein 4)	1100	4900	0.22	2200	0.0585197	Cargo A				41.647		A1	P25366	Required for replication of Brome mosaic virus (BMV). {ECO:0000269|PubMed:14671320}.	OCA4	OCA4				5.85197e-06	41.647	369480	477660000	75000	1292.79	37100	639
IF5_YEAST	Eukaryotic translation initiation factor 5 (eIF-5)	290	10	0.22	2200	215.719	Cargo A				45.261		A1	P38431	Catalyzes the hydrolysis of GTP bound to the 40S ribosomal initiation complex (40S.mRNA.Met-tRNA[F].eIF-2.GTP) with the subsequent joining of a 60S ribosomal subunit resulting in the release of eIF-2 and the guanine nucleotide. The subsequent joining of a 60S ribosomal subunit results in the formation of a functional 80S initiation complex (80S.mRNA.Met-tRNA[F]). eIF-5 is essential for cell viabi…	TIF5	TIF5	K03262;	ENSGT00390000016478;	45_Translation initiation factor eIF3 complex;	0.0215719	45.261	1436500	489380000	276470000	340.675	10.3037	1262
EIF3A_YEAST	Eukaryotic translation initiation factor 3 subunit A (eIF3a) (Eukaryotic translation initiation factor 3 110 kDa subunit homolog) (eIF3 p110) (Translation initiation factor eIF3, p110 subunit homolog)	500	5.7	0.22	2200	391.941	Cargo A	Cytoplasm		Cytoplasm	110.344		A1	P38249	Component of the eukaryotic translation initiation factor 3 (eIF-3) complex, which is involved in protein synthesis and, together with other initiation factors, stimulates binding of mRNA and methionyl-tRNAi to the 40S ribosome. {ECO:0000255|HAMAP-Rule:MF_03000, ECO:0000269|PubMed:11387228, ECO:0000269|PubMed:12651896, ECO:0000269|PubMed:18765792, ECO:0000269|PubMed:9694884}.	RPG1	RPG1	K03254;	ENSGT00730000111063;	45_Translation initiation factor eIF3 complex;	0.0391941	110.34	834950	493990000	502320000	591.64	5.72443	1217
YC16_YEAST	UPF0743 protein YCR087C-A	320	69	0.21	2100	30.2539	Cargo A	Nucleus		Nucleus	17.738		A1	P37263				K15263;			0.00302539	17.738	1206100	460890000	38774000	382.132	69.1913	1129
ELP5_YEAST	Elongator complex protein 5 (Gamma-toxin target 5) (HAT-associated protein 2) (Protein IKI1)	150	48	0.21	2100	43.3607	Cargo A	Both		Both	35.22		A1	P38874	Acts as component of the RNA polymerase II elongator complex, which is a major histone acetyltransferase component of the RNA polymerase II (RNAPII) holoenzyme and is involved in transcriptional elongation. Association with elongating RNAPII requires a hyperphosphorylated state of the RNAPII C-terminal domain (CTD). Elongator binds to both naked and nucleosomal DNA, can acetylate both core and nu…	IKI1	IKI1	K11376;		421_HAP subcomplex of elongator complex;	0.00433607	35.219	2549300	455500000	55572000	178.676	47.7119	1379
NAM7_YEAST	ATP-dependent helicase NAM7 (EC 3.6.4.-) (Nonsense-mediated mRNA decay protein 1) (Nuclear accommodation of mitochondria 7 protein) (Up-frameshift suppressor 1)	14000	61	0.19	1900	31.7247	Cargo A	Both		Both	109.43		A1	P30771	Probable helicase involved in mitochondrial functions. Required for rapid turnover of mRNAs containing a premature translational termination codon.	NAM7	NAM7	K14326;	ENSGT00550000074391;	242_Complex 242;	0.00317247	109.43	26000	428030000	40659000	16462.7	61.2791	759
ELP4_YEAST	Elongator complex protein 4 (Gamma-toxin target 7) (HAT-associated protein 1)	5200	300	0.18	1800	5.91688	Cargo A	Both		Both	51.156		A1	Q02884	Acts as component of the RNA polymerase II elongator complex, which is a major histone acetyltransferase component of the RNA polymerase II (RNAPII) holoenzyme and is involved in transcriptional elongation. Association with elongating RNAPII requires a hyperphosphorylated state of the RNAPII C-terminal domain (CTD). Elongator binds to both naked and nucleosomal DNA, can acetylate both core and nu…	ELP4	ELP4	K11375;		421_HAP subcomplex of elongator complex;	0.000591688	51.155	63693	392560000	7583200	6163.31	301.334	2274
NBP2_YEAST	NAP1-binding protein 2	1800	93	0.18	1800	19.1913	Cargo A	Cytoplasm		Cytoplasm	26.571		A1	Q12163	Negatively regulates the high-osmolarity glycerol (HOG) pathway through its negative regulation of the HOG1 kinase activity. Mediates the binding between the PTC1 phosphatase and the PBS2 MAP/ERK kinase (MEK). With PTC1, regulates endoplasmic reticulum inheritance through the cell wall integrity (CWI) MAPK pathway by modulating the MAPK, SLT2. {ECO:0000269|PubMed:14573466, ECO:0000269|PubMed:1468…	NBP2	NBP2				0.00191913	26.57	182110	391400000	24596000	2149.25	92.6298	2814
STE20_YEAST	Serine/threonine-protein kinase STE20 (EC 2.7.11.1)	1700	12	0.18	1800	143.732	Cargo A	Both		Both	102.362		A1	Q03497	MAP4K component of the MAPK pathway required for the mating pheromone response, haploid invasive growth and diploid pseudohyphal development. Links the pheromone response G-protein beta gamma subunits to downstream signaling components. Needed for mating in haploid cells, induction of a mating-specific gene FUS1, induction of mating-specific morphologies, and pheromone-induced proliferation arres…	STE20	STE20	K04409;	ENSGT00760000119176;		0.0143732	102.36	198320	392600000	184210000	1979.63	12.406	2330
YG32_YEAST	Uncharacterized protein YGR117C	950	210	0.17	1700	8.30199	Cargo A				53.438		A1	P53270							0.000830199	53.437	345520	386460000	10640000	1118.49	211.426	2029
PP2C1_YEAST	Protein phosphatase 2C homolog 1 (PP2C-1) (EC 3.1.3.16)	4600	57	0.17	1700	29.7912	Cargo A				31.55		A1	P35182	It has a serine and a weak tyrosine phosphatase activity with ratios of serine to tyrosine phosphatase activity as high as 200:1. It is essential for growth or germination at 37 degrees Celsius. May have a role in the heat shock response. Involved in tRNA splicing and cell separation.	PTC1	PTC1	K01090;	ENSGT00740000114971;		0.00297912	31.549	68568	373660000	38181000	5449.48	56.9671	1016
AAKG_YEAST	5'-AMP-activated protein kinase subunit gamma (AMPK gamma) (AMPK subunit gamma) (Regulatory protein CAT3) (Sucrose non-fermenting protein 4)	650	15	0.17	1700	119.794	Cargo A	Both		Both	36.401		A1	P12904	Adenine nucleotides-binding subunit gamma of AMP-activated protein kinase (AMPK), an energy sensor protein kinase that plays a key role in regulating cellular energy metabolism. In response to reduction of intracellular ATP levels, AMPK activates energy-producing pathways and inhibits energy-consuming processes: inhibits protein, carbohydrate and lipid biosynthesis, as well as cell growth and pro…	SNF4	SNF4		ENSGT00390000009849;	335_AMP-dependent protein kinase complex;	0.0119794	36.401	505860	385610000	153530000	762.286	14.6201	352
IF6_YEAST	Eukaryotic translation initiation factor 6 (eIF-6)	12000	9.1	0.17	1700	182.862	Cargo A	Both		Both	26.458		A1	Q12522	Binds to the 60S ribosomal subunit and prevents its association with the 40S ribosomal subunit to form the 80S initiation complex in the cytoplasm. Is also involved in ribosome biogenesis. Associates with pre-60S subunits in the nucleus and is involved in its nuclear export. Cytoplasmic release of TIF6 from 60S subunits and nuclear relocalization is promoted by the GTPase RIA1/EFL1 and by SDO1. A…	TIF6	TIF6	K03264;	ENSGT00390000015972;	409_Complex 409;	0.0182862	26.457	26000	368120000	234360000	14158.5	9.14325	2944
HCS1_YEAST	DNA polymerase alpha-associated DNA helicase A (EC 3.6.4.12)	12000	250	0.16	1600	6.4335	Cargo A	Both		Both	78.273		A1	P34243	DNA polymerase alpha-associated DNA helicase which may be involved in DNA replication. {ECO:0000269|PubMed:7681325, ECO:0000269|PubMed:8257676, ECO:0000269|PubMed:8384485, ECO:0000269|PubMed:9341217, ECO:0000269|PubMed:9341218}.	HCS1	HCS1		ENSGT00730000111172;		0.00064335	78.272	26000	355680000	8245300	13680	251.1	1001
DHH1_YEAST	ATP-dependent RNA helicase DHH1 (EC 3.6.4.13) (DExD/H-box helicase 1)	180	9.3	0.16	1600	172.586	Cargo A	Cytoplasm		Cytoplasm	57.544		A1	P39517	ATP-dependent RNA helicase involved in mRNA turnover, and more specifically in mRNA decapping by activating the decapping enzyme DCP1. Is involved in G1/S DNA-damage checkpoint recovery, probably through the regulation of the translational status of a subset of mRNAs. May also have a role in translation and mRNA nuclear export. Required for sporulation. {ECO:0000269|PubMed:11696541, ECO:0000269|P…	DHH1	DHH1	K12614;	ENSGT00740000115573;	246_Complex 246;	0.0172586	57.543	1721300	354980000	221190000	206.228	9.34185	1436
RL9A_YEAST	60S ribosomal protein L9-A (L8) (RP24) (YL11)	180	3	0.15	1500	496.434	Cargo A	Cytoplasm		Cytoplasm	21.569		A1	P05738		RPL9A	RPL9A	K02940;	ENSGT00390000015224;	20_Complex 20;196_Complex 196;	0.0496434	21.569	1515900	328250000	636240000	216.538	3.00316	147
PBS2_YEAST	MAP kinase kinase PBS2 (EC 2.7.12.2) (Polymyxin B resistance protein 2) (Suppressor of fluoride sensitivity 4)	340	53	0.14	1400	26.1544	Cargo A	Cytoplasm		Cytoplasm	72.72		A1	P08018	Kinase involved in a signal transduction pathway that is activated by changes in the osmolarity of the extracellular environment. Seems to phosphorylate HOG1 on a tyrosine residue. {ECO:0000269|PubMed:10970855, ECO:0000269|PubMed:15256499, ECO:0000269|PubMed:7681220}.	PBS2	PBS2	K11227;	ENSGT00760000119199;		0.00261544	72.719	768210	304460000	33520000	396.324	52.8714	237
GLO3_YEAST	ADP-ribosylation factor GTPase-activating protein GLO3 (ARF GAP GLO3)	2800	25	0.14	1400	56.569	Cargo A	Cytoplasm		Cytoplasm	55.094		A1	P38682	GTPase-activating protein for the ADP ribosylation factor (ARF) family. Involved in retrograde vesicular transport from the Golgi to the endoplasmic reticulum. {ECO:0000269|PubMed:9927415}.	GLO3	GLO3	K12493;	ENSGT00390000005436;		0.0056569	55.093	92597	306950000	72500000	3314.9	24.6447	1280
ECM25_YEAST	Protein ECM25 (Extracellular matrix protein 25)	760	150	0.13	1300	9.06431	Cargo A	Cytoplasm		Cytoplasm	68.464		A1	P32525	May be involved in cell wall organization and biogenesis.	ECM25	ECM25			72_Complex 72;	0.000906431	68.463	334590	298190000	11617000	891.21	149.415	851
TTL_YEAST	Probable tubulin--tyrosine ligase PBY1 (EC 6.3.2.25) (P-body-associated protein 1)	9200	33	0.13	1300	38.7541	Cargo A	Cytoplasm		Cytoplasm	86.353		A1	P38254	Probable P-body-associated tubulin--tyrosine ligase. {ECO:0000250}.	PBY1	PBY1				0.00387541	86.352	26000	282460000	49668000	10863.8	33.1036	1219
RL11B_YEAST	60S ribosomal protein L11-B (L16) (RP39) (YL22)	580	3.3	0.13	1300	404.316	Cargo A	Both		Both	19.75		A1	Q3E757	Binds to 5S ribosomal RNA.	RPL11B;RPL11A	RPL11B;RPL11A	K02868;	ENSGT00390000013411;		0.0404316	19.749	425420	291450000	518180000	685.088	3.27399	271
SIW14_YEAST	Tyrosine-protein phosphatase SIW14 (EC 3.1.3.48)	8700	39	0.12	1200	30.6323	Cargo A	Cytoplasm		Cytoplasm	32.755		A1	P53965	Plays a role in actin filament organization and endocytosis. {ECO:0000269|PubMed:15020461}.	SIW14	SIW14	K18045;	ENSGT00530000066535;	490_Complex 490;	0.00306323	32.755	26000	265320000	39259000	10204.6	39.3392	2154
PP11_YEAST	Serine/threonine-protein phosphatase PP1-1 (EC 3.1.3.16)	1100	13	0.12	1200	90.9083	Cargo A	Cytoplasm		Cytoplasm	35.538		A1	P20604	Involved in the dephosphorylation of the large subunit of RNA polymerase II. Is required in late G1 for normal G1 cyclin expression, bud initiation and expression of certain genes that are periodically expressed during late G1. Associates with the SAP proteins in a cell cycle-dependent manner.	SIT4	SIT4	K15427;	ENSGT00550000074961;	83_Sit4/Sap185 protein phosphatase complex;	0.00909083	35.537	202320	259670000	116510000	1283.46	12.9734	507
MOB1_YEAST	DBF2 kinase activator protein MOB1 (MPS1 binder 1) (Maintenance of ploidy protein MOB1)	250	79	0.11	1100	13.8106	Cargo A	Both		Both	35.882		A1	P40484	Functions as an activator subunit for the DBF2 protein kinase. Binds to DBF2, which is required for the phosphorylation and activation of DBF2 by the upstream kinase CDC15 in late anaphase. DBF2-MOB1 is part of the mitotic exit network (MEN) signaling cascade, which regulates release from the nucleus and activity of phosphatase CDC14. Required for inactivation of mitotic cyclin-dependent kinase f…	MOB1	MOB1	K06685;	ENSGT00550000074456;		0.00138106	35.882	824320	239680000	17700000	290.761	78.823	1604
AP1G1_YEAST	AP-1 complex subunit gamma-1 (Clathrin assembly protein complex 1 gamma large chain) (Clathrin assembly protein large gamma chain) (Gamma-adaptin)	7800	25	0.11	1100	44.1254	Cargo A	Cytoplasm		Cytoplasm	93.624		A1	Q12028	Adaptins are components of the adaptor complexes which link clathrin to receptors in coated vesicles. Clathrin-associated protein complexes are believed to interact with the cytoplasmic tails of membrane proteins, leading to their selection and concentration. The AP-1 complex interacts directly with clathrin. {ECO:0000269|PubMed:10564262}.	APL4	APL4	K12391;	ENSGT00390000012618;	315_AP-1 adaptor complex ;	0.00441254	93.623	26000	239950000	56552000	9228.85	24.6983	2766
RS7B_YEAST	40S ribosomal protein S7-B	8300	4.8	0.11	1100	238.175	Cargo A	Both		Both	21.634		A1	P48164	Involved in nucleolar processing of pre-18S ribosomal RNA and ribosome assembly. {ECO:0000269|PubMed:15590835}.	RPS7B	RPS7B	K02993;	ENSGT00390000014122;		0.0238175	21.634	26000	254020000	305250000	9770	4.84403	1859
MNP1_YEAST	54S ribosomal protein L12, mitochondrial (Mitochondrial-nucleoid protein 1)	830	66	0.1	1000	15.8627	Cargo A	Cytoplasm		Cytoplasm	20.65	MT	A1	P53163		MNP1	MNP1	K02935;	ENSGT00390000000190;		0.00158627	20.65	237150	231880000	20330000	977.778	66.3927	1989
RTR1_YEAST	RNA polymerase II subunit B1 CTD phosphatase RTR1 (EC 3.1.3.16) (RNA polymerase II-associated protein 2 homolog RTR1) (Regulator of transcription 1)	390	60	0.1	1000	16.5353	Cargo A	Both		Both	26.24		A1	P40084	RNA polymerase II subunit B1 C-terminal domain (CTD) phosphatase that dephosphorylates 'Ser-5' of the CTD and regulates RNA polymerase II during the transition from 'Ser-5' to 'Ser-2' phosphorylation. {ECO:0000269|PubMed:18408053, ECO:0000269|PubMed:19394294}.	RTR1	RTR1		ENSGT00530000069589;		0.00165353	26.239	483260	220040000	21192000	455.324	60.44	1534
WHI3_YEAST	Protein WHI3	190	39	0.1	1000	26.8356	Cargo A				71.253		A1	P34761	Involved in size control and cell cycle. {ECO:0000269|PubMed:11290704}.	WHI3	WHI3		ENSGT00530000067542;		0.00268356	71.252	1030300	229950000	34393000	223.187	38.9187	1008
AP1S1_YEAST	AP-1 complex subunit sigma-1 (Clathrin assembly protein complex 1 sigma-1 small chain) (Clathrin coat assembly protein AP19) (Clathrin coat-associated protein AP19) (Golgi adaptor AP-1 19 kDa adaptin) (HA1 19 kDa subunit) (Sigma1-adaptin)	820	22	0.1	1000	46.5949	Cargo A	Cytoplasm		Cytoplasm	18.152		A1	P35181	Component of the adaptor complexes which link clathrin to receptors in coated vesicles. Clathrin-associated protein complexes are believed to interact with the cytoplasmic tails of membrane proteins, leading to their selection and concentration. AP19 is probably a subunit of the Golgi membrane adaptor. {ECO:0000269|PubMed:10564262}.	APS1	APS1		ENSGT00530000062839;	315_AP-1 adaptor complex ;	0.00465949	18.152	233510	225520000	59717000	965.783	21.9827	1015
NSR1_YEAST	Nuclear localization sequence-binding protein (p67)	2000	8.3	0.1	1000	125.263	Cargo A	Nucleus		Nucleus	44.535		A1	P27476	Involved in pre-rRNA processing. Specifically binds nuclear localization sequences. Candidate for a receptor at the nucleus that may be involved in both RNA and protein transport. Binds telomeric sequences of the type (TG[1-3])n in vitro.	NSR1	NSR1	K11294;	ENSGT00730000110998;		0.0125263	44.535	98420	228920000	160540000	2325.95	8.30032	706
RL19B_YEAST	60S ribosomal protein L19-B (L23) (RP15L) (RP33) (YL14)	7400	5	0.1	1000	204.694	Cargo A	Cytoplasm		Cytoplasm	21.704		A1	P0CX83		RPL19B;RPL19A	RPL19B;RPL19A	K02885;	ENSGT00390000012628;	176_Complex 176;196_Complex 196;	0.0204694	21.704	26000	225680000	262340000	8680	5.00752	303
AP1B1_YEAST	AP-1 complex subunit beta-1 (Beta-1-adaptin) (Clathrin assembly protein complex 1 beta-1 large chain) (Clathrin assembly protein large beta-1 chain)	1800	19	0.097	970	50.1997	Cargo A	Cytoplasm		Cytoplasm	81.869		A1	P36000	Adaptins are components of the adaptor complexes which link clathrin to receptors in coated vesicles. Clathrin-associated protein complexes are believed to interact with the cytoplasmic tails of membrane proteins, leading to their selection and concentration. The AP-1 complex interacts directly with clathrin. {ECO:0000269|PubMed:10564262}.	APL2	APL2		ENSGT00530000063138;	315_AP-1 adaptor complex ;	0.00501997	81.868	102180	213420000	64337000	2088.67	19.3094	1041
IF2P_YEAST	Eukaryotic translation initiation factor 5B (eIF-5B) (Translation initiation factor IF-2)	4800	4.4	0.096	960	218.481	Cargo A				112.268		A1	P39730	Function in general translation initiation by promoting the binding of the formylmethionine-tRNA to ribosomes. Seems to function along with eIF-2.	FUN12	FUN12	K03243;	ENSGT00730000111064;	45_Translation initiation factor eIF3 complex;265_Complex 265;	0.0218481	112.27	37699	212470000	280010000	5635.96	4.41691	1463
REG1_YEAST	Resistance to glucose repression protein 1 (Protein HEX2) (Second-site suppressor of the rna1-1 mutation 1)	6600	54	0.091	910	16.9044	Cargo A	Nucleus		Nucleus	112.616		A1	Q00816	Involved in RNA processing and negative regulation of glucose repression. Regulates the level of two antigens, P43 and P70. Binds to protein phosphatase type 1. Functions with REG2 and SNF1 protein kinase to regulate growth. Might regulate SNF1 directly or indirectly. {ECO:0000269|PubMed:21216941}.	REG1	REG1			335_AMP-dependent protein kinase complex;	0.00169044	112.61	26000	200790000	21665000	7722.69	53.9483	2212
RL16B_YEAST	60S ribosomal protein L16-B (L21) (RP23) (YL15)	110	4.6	0.091	910	196.478	Cargo A	Cytoplasm		Cytoplasm	22.249		A1	P26785		RPL16B	RPL16B	K02872;	ENSGT00390000010799;		0.0196478	22.249	1601400	201000000	251810000	125.515	4.64641	699
NMD3_YEAST	60S ribosomal export protein NMD3 (Nonsense-mediated mRNA decay protein 3)	250	12	0.09	900	77.9537	Cargo A	Both	NESdb, BioGrid	Both	59.095		A1	P38861	Acts as an adapter for the XPO1/CRM1-mediated export of the 60S ribosomal subunit. Unlikely to play a significant role in nonsense-mediated mRNA decay (NMD). {ECO:0000269|PubMed:11086007}.	NMD3	NMD3	K07562;	ENSGT00390000005104;	50_Complex 50;	0.00779537	59.095	686250	199090000	99907000	290.113	11.5997	1374
PTK2_YEAST	Serine/threonine-protein kinase PTK2/STK2 (EC 2.7.11.1)	740	38	0.089	890	23.5936	Cargo A	Both		Both	91.4		A1	P47116	Essential determinant for high-affinity spermidine transport. Required for the activation of the plasma membrane proton pump PMA1 via phosphorylation of 'Ser-899'. {ECO:0000269|PubMed:11003661, ECO:0000269|PubMed:9154797}.	PTK2	PTK2	K08286;	ENSGT00550000075309;		0.00235936	91.399	224630	196050000	30238000	872.769	37.7406	1822
OCA6_YEAST	Putative tyrosine-protein phosphatase OCA6 (EC 3.1.3.48) (Oxidant-induced cell-cycle arrest protein 6)	6300	120	0.087	870	7.16374	Cargo A	Cytoplasm		Cytoplasm	26.024		A1	Q12454	Required for replication of Brome mosaic virus (BMV). {ECO:0000269|PubMed:14671320}.	OCA6	OCA6	K18046;			0.000716374	26.024	26000	192170000	9181200	7391.15	121.837	2917
YAP1_YEAST	AP-1-like transcription factor YAP1 (Phenanthroline resistance protein PAR1) (Pleiotropic drug resistance protein PDR4)	6200	150	0.086	860	5.84143	Cargo A	Both	NESdb, BioGrid	Both	72.533		A1	P19880	Transcription activator involved in oxidative stress response and redox homeostasis. Regulates the transcription of genes encoding antioxidant enzymes and components of the cellular thiol-reducing pathways, including the thioredoxin system (TRX2, TRR1), the glutaredoxin system (GSH1, GLR1), superoxide dismutase (SOD1, SOD2), glutathione peroxidase (GPX2), and thiol-specific peroxidases (TSA1, AHP…	YAP1	YAP1	K09043;	ENSGT00530000069148;		0.000584143	72.532	26000	190090000	7486500	7311.15	147.8	481
AMPD_YEAST	AMP deaminase (EC 3.5.4.6) (Myoadenylate deaminase)	6200	9.5	0.086	860	91.5716	Cargo A				93.302		A1	P15274	AMP deaminase plays a critical role in energy metabolism.	AMD1	AMD1	K01490;	ENSGT00390000008190;		0.00915716	93.3	26000	190920000	117360000	7343.08	9.46947	392
RL24A_YEAST	60S ribosomal protein L24-A (L30) (RP29) (YL21)	6200	4.5	0.086	860	191.383	Cargo A	Cytoplasm		Cytoplasm	17.614		A1	P04449		RPL24A	RPL24A	K02896;	ENSGT00550000074809;	117_Complex 117;	0.0191383	17.613	26000	190710000	245280000	7335	4.52591	126
YJE9_YEAST	Uncharacterized protein YJL049W	170	4900	0.084	840	0.0585197	Cargo A				52.849		A1	P47048				K15053;			5.85197e-06	52.849	931250	185960000	75000	199.689	14432.9	1795
EAP1_YEAST	Protein EAP1 (eIF4E-associated protein 1)	1400	17	0.082	820	48.5417	Cargo A	Cytoplasm		Cytoplasm	69.762		A1	P36041	Can regulate translation through binding to eIF4E. Competes with eIF4G and p20 for binding to eIF4E in vivo and inhibits cap-dependent translation in vitro. Plays a role in cell growth and is implicated in the TOR signaling cascade. Functions independently of eIF4E to maintain genetic stability and to attenuate GCN4 translation upon TOR inactivation. {ECO:0000269|PubMed:10848587, ECO:0000269|PubM…	EAP1	EAP1	K15908;			0.00485417	69.761	111190	181290000	62212000	1630.45	16.9627	1060
SMY2_YEAST	Protein SMY2 (Suppressor of MYO2-66 protein)	370	16	0.082	820	51.8375	Cargo A	Cytoplasm		Cytoplasm	81.397		A1	P32909	Suppressor of the MYO2 gene.	SMY2	SMY2	K18657;	ENSGT00730000114012;		0.00518375	81.396	420750	182230000	66436000	433.108	15.9665	932
SNF1_YEAST	Carbon catabolite-derepressing protein kinase (EC 2.7.11.1)	5900	38	0.081	810	21.4549	Cargo A	Both		Both	72.045		A1	P06782	Essential for release from glucose repression. It interacts and has functional relationship to the regulatory protein SNF4. Could phosphorylate CAT8. Phosphorylates histone H3 to form H3S10ph, which promotes H3K14ac formation, and which is required for transcriptional activation through TBP recruitment to the promoters. {ECO:0000269|PubMed:15719021}.	SNF1	SNF1	K12761;	ENSGT00760000118892;	335_AMP-dependent protein kinase complex;	0.00214549	72.045	26000	179480000	27497000	6903.08	37.9949	187
RL17B_YEAST	60S ribosomal protein L17-B (L20) (YL17)	480	4.6	0.081	810	175.184	Cargo A	Cytoplasm		Cytoplasm	20.551		A1	P46990		RPL17B	RPL17B	K02880;	ENSGT00390000014873;		0.0175184	20.551	312290	177980000	224520000	569.919	4.61435	1778
AP3S_YEAST	AP-3 complex subunit sigma (AP-3 complex sigma3A subunit) (Adaptor-related protein complex 3 subunit sigma) (Clathrin-associated/assembly/adaptor protein, small 3) (Sigma-adaptin 3A) (Sigma3-adaptin)	5800	13	0.08	800	63.7981	Cargo A	Cytoplasm		Cytoplasm	21.938		A1	P47064	Part of the AP-3 complex, an adaptor-related complex which is not clathrin-associated. The complex is associated with the Golgi region as well as more peripheral structures. It facilitates the budding of vesicles from the Golgi membrane and may be directly involved in trafficking to the vacuole. Required for the transport via the ALP pathway, which directs the transport of the cargo proteins PHO8…	APS3	APS3	K12399;	ENSGT00550000074761;		0.00637981	21.938	26000	177760000	81765000	6836.92	12.655	1802
YD333_YEAST	Uncharacterized protein YDR333C	5700	200	0.079	790	4.04738	Cargo A	Cytoplasm		Cytoplasm	83.426		A1	Q05468		YDR333C	YDR333C		ENSGT00390000005563;		0.000404738	83.425	26000	174410000	5187200	6708.08	195.719	2482
GAL83_YEAST	SNF1 protein kinase subunit beta-3 (Glucose repression protein GAL83) (Protein SPM1)	5700	160	0.079	790	4.83638	Cargo A	Both		Both	46.648		A1	Q04739	Beta subunit of the SNF1 kinase complex, which is required for transcriptional, metabolic, and developmental adaptations in response to glucose limitation. Has a structural role, mediating heterotrimer formation, and a regulatory role, defining carbon source-regulated subcellular location and substrate specificity of the SNF1 kinase complex. Promotes the relocalization of the SNF1 kinase complex …	GAL83	GAL83		ENSGT00390000001416;	335_AMP-dependent protein kinase complex;	0.000483638	46.648	26000	174760000	6198400	6721.54	164.118	2457
RL8B_YEAST	60S ribosomal protein L8-B (L4) (L4-1) (RP6) (YL5)	290	3	0.078	780	257.877	Cargo A	Cytoplasm		Cytoplasm	28.112		A1	P29453		RPL8B	RPL8B	K02936;	ENSGT00390000004753;		0.0257877	28.111	504670	173000000	330500000	342.798	3.04698	742
STE50_YEAST	Protein STE50	5600	4900	0.077	770	0.0585197	Cargo A				38.971		A1	P25344	Involved in growth arrest during conjugation. May interact with the G protein alpha subunit.	STE50	STE50			276_Ste50/Ste11 complex;	5.85197e-06	38.97	26000	170910000	75000	6573.46	13264.8	631
PUR91_YEAST	Bifunctional purine biosynthesis protein ADE16 [Includes: Phosphoribosylaminoimidazolecarboxamide formyltransferase (EC 2.1.2.3) (5-aminoimidazole-4-carboxamide ribonucleotide formyltransferase) (AICAR transformylase); IMP cyclohydrolase (EC 3.5.4.10) (ATIC) (IMP synthase) (Inosinicase)]	1100	3.7	0.076	760	207.284	Cargo A				65.282		A1	P54113		ADE16	ADE16	K00602;	ENSGT00390000004553;	79_Protein phosphatase 1 complex ;	0.0207284	65.282	124650	167050000	265660000	1340.15	3.66028	2164
AP3M_YEAST	AP-3 complex subunit mu (AP-3 adaptor complex mu3A subunit) (Adaptor-related protein complex 3 subunit mu) (Mu-adaptin 3A) (Mu3-adaptin)	150	89	0.074	740	8.4401	Cargo A	Cytoplasm		Cytoplasm	54.837		A1	P38153	Part of the AP-3 complex, an adaptor-related complex which is not clathrin-associated. The complex is associated with the Golgi region as well as more peripheral structures. It facilitates the budding of vesicles from the Golgi membrane and may be directly involved in trafficking to the vacuole. Required for the transport via the ALP pathway, which directs the transport of the cargo proteins PHO8…	APM3	APM3			262_Clathrin-associated protein AP-3 complex ;	0.00084401	54.837	958850	164500000	10817000	171.56	88.5225	1183
PUF3_YEAST	mRNA-binding protein PUF3 (Pumilio homology domain family member 3)	180	76	0.073	730	9.5824	Cargo A	Cytoplasm	BioGrid	Cytoplasm	98.068		A1	Q07807	RNA-binding protein involved in post-transcriptional regulation. Negatively regulates expression of COX17 by binding to the 3'-UTR of COX17 mRNA. Promotes decay of COX17 mRNA by enhancing its rate of deadenylation and subsequent turnover. Predominantly binds to mRNAs encoding mitochondrial proteins and localizes them to the vicinity of mitochondria for translation. Regulates mitochondrial biogene…	PUF3	PUF3	K17944;	ENSGT00390000017241;		0.00095824	98.067	748590	161100000	12281000	215.205	76.3583	2655
RPAB1_YEAST	DNA-directed RNA polymerases I, II, and III subunit RPABC1 (RNA polymerases I, II, and III subunit ABC1) (ABC27) (DNA-directed RNA polymerases I, II, and III 27 kDa polypeptide)	210	6.2	0.072	720	115.775	Cargo A	Nucleus		Nucleus	25.079		A1	P20434	DNA-dependent RNA polymerases catalyze the transcription of DNA into RNA using the four ribonucleoside triphosphates as substrates. Common component of RNA polymerases I, II and III which synthesize ribosomal RNA precursors, mRNA precursors and many functional non-coding RNAs, and small RNAs, such as 5S rRNA and tRNAs, respectively. Pol II is the central component of the basal RNA polymerase II t…	RPB5	RPB5	K03013;	ENSGT00390000013841;		0.0115775	25.079	627640	158280000	148380000	252.183	6.20934	496
OCA2_YEAST	Tyrosine-protein phosphatase-like protein OCA2 (Oxidant-induced cell-cycle arrest protein 2)	5100	31	0.071	710	22.9054	Cargo A	Cytoplasm		Cytoplasm	22.472		A1	P53949	Required for normal growth in the presence of linoleic acid hydroperoxide (LoaOOH).	OCA2	OCA2	K18044;	ENSGT00530000066535;		0.00229054	22.472	26000	157340000	29356000	6051.54	31.1987	2147
RS15_YEAST	40S ribosomal protein S15 (RIG protein) (RP52) (S21) (YS21)	5100	3.6	0.071	710	198.702	Cargo A	Cytoplasm		Cytoplasm	16.002		A1	Q01855	Involved in the nuclear export of the small ribosomal subunit. Has a role in the late stage of the assembly of pre-40S particles within the nucleus and controls their export to the cytoplasm. {ECO:0000269|PubMed:15167894}.	RPS15	RPS15	K02958;	ENSGT00390000000475;		0.0198702	16.002	26000	157050000	254660000	6040.38	3.58981	2232
RIO2_YEAST	Serine/threonine-protein kinase RIO2 (EC 2.7.11.1)	5000	86	0.07	700	8.08196	Cargo A	Both		Both	49.125		A1	P40160	Required for the final endonucleolytic cleavage of 20S pre-rRNA at site D in the cytoplasm, converting it into the mature 18S rRNA. Involved in normal export of the pre-40S particles from the nucleus to the cytoplasm. No longer associates with pre-40S subunits in RPS19 disruptions, suggesting it acts after the ribosomal protein in 18S rRNA maturation. {ECO:0000269|PubMed:12612080, ECO:0000269|Pub…	RIO2	RIO2	K07179;	ENSGT00390000003255;	58_Complex 58;	0.000808196	49.124	26000	153920000	10358000	5920	86.4995	1546
OCA5_YEAST	Oxidant-induced cell-cycle arrest protein 5	4700	24	0.066	660	26.9214	Cargo A	Cytoplasm		Cytoplasm	77.756		A1	P38738	Required for replication of brome mosaic virus (BMV), a positive-strand RNA virus. {ECO:0000269|PubMed:14671320}.	OCA5	OCA5				0.00269214	77.756	26000	145130000	34503000	5581.92	24.4847	1305
NHP2_YEAST	H/ACA ribonucleoprotein complex subunit 2 (H/ACA snoRNP protein NHP2) (High mobility group-like nuclear protein 2)	4500	24	0.063	630	26.2035	Cargo A	Nucleus		Nucleus	17.122		A1	P32495	Required for ribosome biogenesis. Part of a complex which catalyzes pseudouridylation of rRNA. This involves the isomerization of uridine such that the ribose is subsequently attached to C5, instead of the normal N1. Pseudouridine ("psi") residues may serve to stabilize the conformation of rRNAs. Essential for growth. Directly binds H/ACA snoRNAs. {ECO:0000269|PubMed:11433018, ECO:0000269|PubMed:…	NHP2	NHP2	K11129;	ENSGT00550000074939;		0.00262035	17.122	26000	138840000	33583000	5340	24.0652	840
IWR1_YEAST	RNA polymerase II nuclear localization protein IWR1 (Interacting with RNA polymerase II protein 1)	4400	94	0.062	620	6.59969	Cargo A	Both		Both	40.64		A1	Q07532	Directs RNA polymerase II nuclear import. Binds RNA polymerase II in the active center cleft between the two largest subunits in the cytoplasm. Then uses an N-terminal bipartite nuclear localization signal that may be recognized by karyopherin alpha to direct the polymerase II complex nuclear import. In the nucleus, is displaced from polymerase II complex by transcription initiation factors and n…	IWR1	IWR1			73_RNA polymerase II complex ;	0.000659969	40.64	26000	136110000	8458300	5235	93.6702	2641
LSM1_YEAST	Sm-like protein LSm1 (SPB8 protein)	4500	6.6	0.062	620	95.5743	Cargo A	Both		Both	20.307		A1	P47017	Component of the cytoplasmic LSM1-LSM7 complex which is involved in mRNA degradation by activating the decapping step. The LSM1-LSM7 complex binds RNA with a preference for poly-U ends. {ECO:0000269|PubMed:10747033, ECO:0000269|PubMed:10761922, ECO:0000269|PubMed:10913177, ECO:0000269|PubMed:24513854}.	LSM1	LSM1	K12620;	ENSGT00730000111133;	281_"Cytoplasmic mRNA processing body""";	0.00955743	20.307	26000	137870000	122490000	5302.69	6.55185	1785
MKS1_YEAST	Negative regulator of RAS-cAMP pathway	4300	290	0.059	590	2.01393	Cargo A	Nucleus		Nucleus	65.643		A1	P34072	Negative regulator of Ras-cAMP pathway. Involved in transcriptional regulation of galactose-inducible genes.	MKS1	MKS1			13_Trehalose-6-phosphate synthase/ phosphatase complex;356_Rtg2/Mks1 complex;	0.000201393	65.642	26000	130500000	2581100	5019.23	294.307	979
KSP1_YEAST	Serine/threonine-protein kinase KSP1 (EC 2.7.11.1)	100	120	0.059	590	5.15909	Cargo A	Nucleus	BioGrid	Nucleus	117.082		A1	P38691	May act on PRP20.	KSP1	KSP1	K08286;	ENSGT00390000011998;		0.000515909	117.08	1098000	131220000	6612000	119.508	115.521	1284
AP3D_YEAST	AP-3 complex subunit delta (Adaptor-related protein complex 3 subunit delta) (Delta-adaptin 3) (Delta-adaptin)	1200	24	0.059	590	24.9021	Cargo A	Cytoplasm		Cytoplasm	106.924		A1	Q08951	Part of the AP-3 complex, an adaptor-related complex which is not clathrin-associated. The complex is associated with the Golgi region as well as more peripheral structures. It facilitates the budding of vesicles from the Golgi membrane and may be directly involved in trafficking to the vacuole. Required for the transport via the ALP pathway, which directs the transport of the cargo proteins PHO8…	APL5	APL5		ENSGT00550000075067;	262_Clathrin-associated protein AP-3 complex ;	0.00249021	106.92	89015	130480000	31915000	1465.82	23.7982	2740
CLA4_YEAST	Serine/threonine-protein kinase CLA4 (EC 2.7.11.1)	1500	160	0.056	560	3.59834	Cargo A				93.909		A1	P48562	Involved in budding and cytokinesis.	CLA4	CLA4	K08286;	ENSGT00680000099731;		0.000359834	93.908	70500	124740000	4611700	1769.36	157.449	1872
SFB2_YEAST	SED5-binding protein 2 (SEC24-related protein 2)	4000	770	0.055	550	0.717685	Cargo A	Cytoplasm		Cytoplasm	98.944		A1	P53953	Component of the COPII coat, that covers ER-derived vesicles involved in transport from the endoplasmic reticulum to the Golgi apparatus. COPII acts in the cytoplasm to promote the transport of secretory, plasma membrane, and vacuolar proteins from the endoplasmic reticulum to the Golgi complex. {ECO:0000269|PubMed:10712514, ECO:0000269|PubMed:10749860, ECO:0000269|PubMed:10753972, ECO:0000269|Pu…	SFB2	SFB2		ENSGT00590000082962;	340_Coatomer COPII complex ;	7.17685e-05	98.942	26000	121700000	919800	4680.77	770.179	2149
ATG13_YEAST	Autophagy-related protein 13	130	990	0.054	540	0.552402	Cargo A	Cytoplasm		Cytoplasm	83.281		A1	Q06628	Activates the ATG1 kinase in a nutritional condition dependent manner through the TOR pathway, leading to autophagy. Required for autophosphorylation of ATG1 at 'Thr-226' and its dimerization. May also be involved in the regulation of autophagy through SNF1. Involved in ATG9 and ATG23 cycling through the pre-autophagosomal structure. Also involved in cytoplasm to vacuole transport (Cvt) and more …	ATG13	ATG13	K08331;			5.52402e-05	83.28	781430	120360000	707970	154.025	989.605	2593
AP3B_YEAST	AP-3 complex subunit beta (Adaptor-related protein complex 3 subunit beta) (Beta-3-adaptin) (Clathrin assembly protein complex 3 beta large chain) (Clathrin assembly protein large beta chain)	3900	48	0.054	540	11.3481	Cargo A	Cytoplasm		Cytoplasm	91.607		A1	P46682	Part of the AP-3 complex, an adaptor-related complex which is not clathrin-associated. The complex is associated with the Golgi region as well as more peripheral structures. It facilitates the budding of vesicles from the Golgi membrane and may be directly involved in trafficking to the vacuole. Required for the transport via the ALP pathway, which directs the transport of the cargo proteins PHO8…	APL6	APL6		ENSGT00530000063546;	262_Clathrin-associated protein AP-3 complex ;	0.00113481	91.606	26000	119620000	14544000	4600.77	47.8756	1765
RPB4_YEAST	DNA-directed RNA polymerase II subunit RPB4 (RNA polymerase II subunit B4) (B32) (DNA-directed RNA polymerase II 32 kDa polypeptide)	3900	5.7	0.054	540	94.9033	Cargo A	Both		Both	25.414		A1	P20433	DNA-dependent RNA polymerase catalyzes the transcription of DNA into RNA using the four ribonucleoside triphosphates as substrates. Component of RNA polymerase II which synthesizes mRNA precursors and many functional non-coding RNAs. Pol II is the central component of the basal RNA polymerase II transcription machinery. It is composed of mobile elements that move relative to each other. RPB4 is p…	RPB4	RPB4	K03012;	ENSGT00390000004912;	73_RNA polymerase II complex ;	0.00949033	25.414	26000	118880000	121630000	4572.31	5.68935	495
RPB7_YEAST	DNA-directed RNA polymerase II subunit RPB7 (RNA polymerase II subunit B7) (B16)	3900	5.4	0.054	540	100.802	Cargo A	Both		Both	19.058		A1	P34087	DNA-dependent RNA polymerase catalyzes the transcription of DNA into RNA using the four ribonucleoside triphosphates as substrates. Component of RNA polymerase II which synthesizes mRNA precursors and many functional non-coding RNAs. Pol II is the central component of the basal RNA polymerase II transcription machinery. It is composed of mobile elements that move relative to each other. RPB7 is p…	RPB7	RPB7	K03015;	ENSGT00390000008975;	73_RNA polymerase II complex ;	0.0100802	19.058	26000	119560000	129190000	4598.46	5.38706	982
ARD1_YEAST	N-terminal acetyltransferase A complex catalytic subunit ARD1 (NatA complex subunit ARD1) (EC 2.3.1.88) (Arrest-defective protein 1)	440	3.5	0.054	540	153.954	Cargo A	Cytoplasm		Cytoplasm	27.603		A1	P07347	Catalytic component of the NatA N-terminal acetyltransferase, which catalyzes acetylation of proteins beginning with Met-Ser, Met-Gly and Met-Ala. N-acetylation plays a role in normal eukaryotic translation and processing, protect against proteolytic degradation and protein turnover. {ECO:0000269|PubMed:1600941}.	ARD1	ARD1	K00670;	ENSGT00550000074803;		0.0153954	27.603	230200	118570000	197310000	515.074	3.498	228
SRP21_YEAST	Signal recognition particle subunit SRP21 (Signal recognition particle 21 kDa protein)	120	38	0.053	530	14.0151	Cargo A	Both		Both	18.425		A1	P32342	Signal-recognition-particle (SRP) assembly has a crucial role in targeting secretory proteins to the rough endoplasmic reticulum (ER) membrane. SRP is required for the cotranslational protein translocation for ER import and preferentially recognizes strongly hydrophobic signal sequences. It is involved in targeting the nascent chain-ribosome (RNC) complex to the ER and is proposed to participate …	SRP21	SRP21				0.00140151	18.425	804140	117970000	17962000	146.703	38.2306	795
BRX1_YEAST	Ribosome biogenesis protein BRX1	2300	200	0.052	520	2.56105	Cargo A	Nucleus		Nucleus	33.531		A1	Q08235	Required for biogenesis of the 60S ribosomal subunit. {ECO:0000269|PubMed:11843177}.	BRX1	BRX1	K14820;	ENSGT00390000014467;	56_Complex 56;440_Complex 440;	0.000256105	33.531	41747	114330000	3282300	2738.64	202.757	2690
HOS3_YEAST	Histone deacetylase HOS3 (EC 3.5.1.98)	610	160	0.052	520	3.21679	Cargo A	Nucleus		Nucleus	79.2		A1	Q02959	Responsible for the deacetylation of lysine residues on the N-terminal part of the core histones (H2A, H2B, H3 and H4). Histone deacetylation gives a tag for epigenetic repression and plays an important role in transcriptional regulation, cell cycle progression and developmental events. Histone deacetylases act via the formation of large multiprotein complexes (By similarity). {ECO:0000250}.	HOS3	HOS3	K11484;			0.000321679	79.199	159420	115230000	4122700	722.808	162.697	2282
PUF4_YEAST	Pumilio homology domain family member 4	670	26	0.052	520	20.3149	Cargo A				97.798		A1	P25339	Is not essential for haploid growth, but may affect diploid formation.	PUF4	PUF4		ENSGT00730000112282;		0.00203149	97.797	146100	114460000	26036000	783.436	25.5902	628
PEX19_YEAST	Peroxisomal membrane protein import receptor PEX19 (Peroxin-19)	730	73	0.051	510	7.02181	Cargo A	Cytoplasm	BioGrid	Cytoplasm	38.706		A1	Q07418	Required for proper post-translational import and stabilization of peroxisomal membrane proteins (PMPs). Acts as a cytosolic import receptor for PMPs and delivers them to the docking factor PEX3 at the peroxisomal membrane for subsequent insertion into the membrane. Acts as a chaperone in stabilizing or maintaining PMPs in the lipid bilayer. Directs PEX17, a peripheral component of the peroxisoma…	PEX19	PEX19	K13337;			0.000702181	38.706	131780	113000000	8999300	857.49	73.0911	2632
AP18A_YEAST	Clathrin coat assembly protein AP180A	850	42	0.051	510	12.4288	Cargo A	Cytoplasm		Cytoplasm	71.66		A1	P38856	Involved in endocytosis and clathrin cage assembly. {ECO:0000269|PubMed:14704157, ECO:0000269|PubMed:9531549}.	YAP1801	YAP1801		ENSGT00390000008805;		0.00124288	71.659	112930	113600000	15929000	1005.93	41.513	1370
AP1M1_YEAST	AP-1 complex subunit mu-1-I (Clathrin assembly protein complex 1 mu-1-I medium chain) (Clathrin coat assembly protein AP54) (Clathrin coat-associated protein AP54) (Golgi adaptor AP-1 54 kDa protein) (HA1 54 kDa subunit) (Mu(1)-adaptin) (Mu1-I-adaptin)	3600	180	0.049	490	2.77204	Cargo A	Cytoplasm		Cytoplasm	53.874		A1	Q00776	Component of the adaptor complexes which link clathrin to receptors in coated vesicles. Clathrin-associated protein complexes are believed to interact with the cytoplasmic tails of membrane proteins, leading to their selection and concentration. The AP-1 complex interacts directly with clathrin. AP57 is probably a subunit of the Golgi membrane adaptor. {ECO:0000269|PubMed:10564262}.	APM1	APM1	K12393;	ENSGT00530000062779;	315_AP-1 adaptor complex ;	0.000277204	53.873	26000	109210000	3552700	4200.38	178.936	2211
ELP1_YEAST	Elongator complex protein 1 (Gamma-toxin target 1) (Protein IKI3)	150	5.3	0.049	490	91.1346	Cargo A	Both		Both	152.99		A1	Q06706	Acts as component of the RNA polymerase II elongator complex, which is a major histone acetyltransferase component of the RNA polymerase II (RNAPII) holoenzyme and is involved in transcriptional elongation. Association with elongating RNAPII requires a hyperphosphorylated state of the RNAPII C-terminal domain (CTD). Elongator binds to both naked and nucleosomal DNA, can acetylate both core and nu…	IKI3	IKI3	K11373;	ENSGT00390000013344;	421_HAP subcomplex of elongator complex;	0.00911346	152.99	626540	107280000	116800000	171.226	5.34651	2614
SA190_YEAST	SIT4-associating protein SAP190	3400	39	0.048	480	12.3422	Cargo A	Cytoplasm		Cytoplasm	117.098		A1	P36123	Positive regulator of protein phosphatase SIT4. Involved in the general amino acid control (GAAC) response regulated by TOR. Involved in the dephosphorylation of the elongator complex subunit IKI3. {ECO:0000269|PubMed:14718557, ECO:0000269|PubMed:15367655}.	SAP190	SAP190	K15458;	ENSGT00390000009899;	35_Sit4/Sap190 complex;483_Complex 483;	0.00123422	117.1	26000	105560000	15818000	4060	38.8456	1094
ELP3_YEAST	Elongator complex protein 3 (EC 2.3.1.48) (Gamma-toxin target 3)	370	16	0.048	480	30.0229	Cargo A	Both		Both	63.657		A1	Q02908	Acts as catalytic subunit of the RNA polymerase II elongator complex, which is a major histone acetyltransferase component of the RNA polymerase II (Pol II) holoenzyme and is involved in transcriptional elongation. Association with elongating RNAPII requires a hyperphosphorylated state of the RNAPII C-terminal domain (CTD). Elongator binds to both naked and nucleosomal DNA, can acetylate both cor…	ELP3	ELP3	K07739;	ENSGT00390000013141;	421_HAP subcomplex of elongator complex;	0.00300229	63.656	241230	105910000	38478000	439.042	16.0221	2277
SLA1_YEAST	Actin cytoskeleton-regulatory complex protein SLA1	150	51	0.047	470	9.32959	Cargo A	Both		Both	135.848		A1	P32790	Component of the PAN1 actin cytoskeleton-regulatory complex required for the internalization of endosomes during actin-coupled endocytosis. The complex links the site of endocytosis to the cell membrane-associated actin cytoskeleton. Mediates uptake of external molecules and vacuolar degradation of plasma membrane proteins. Plays a role in the proper organization of the cell membrane-associated a…	SLA1	SLA1		ENSGT00730000114400;	42_Cytoskeleton-regulatory Lsb3/Las17 complex ;	0.000932959	135.85	578670	103790000	11957000	179.36	50.5275	903
LSM4_YEAST	U6 snRNA-associated Sm-like protein LSm4	3400	6.8	0.047	470	69.0649	Cargo A	Both		Both	21.276		A1	P40070	Component of LSm protein complexes, which are involved in RNA processing and may function in a chaperone-like manner. Component of the cytoplasmic LSM1-LSM7 complex which is involved in mRNA degradation by activating the decapping step. Component of the nuclear LSM2-LSM8 complex, which is involved in splicing of nuclear mRNAs. LSM2-LSM8 associates with multiple spliceosome snRNP complexes contain…	LSM4	LSM4	K12623;	ENSGT00610000086173;	3_Lsm2-Lsm8 complex ;	0.00690649	21.276	26000	103100000	88515000	3965.38	6.7801	1527
BECN1_YEAST	Vacuolar protein sorting-associated protein 30 (Autophagy-related protein 6)	3300	9.9	0.046	460	46.8485	Cargo A	Cytoplasm	BioGrid	Cytoplasm	63.261		A1	Q02948	Required for cytoplasm to vacuole transport (Cvt), autophagy, nucleophagy, and mitophagy, as a part of the autophagy-specific VPS34 PI3-kinase complex I. This complex is essential to recruit the ATG8-phosphatidylinositol conjugate and the ATG12-ATG5 conjugate to the pre-autophagosomal structure. Also involved in endosome-to-Golgi retrograde transport as part of the VPS34 PI3-kinase complex II. Th…	VPS30	VPS30	K08334;	ENSGT00390000008164;	441_Vps34 PtdIns 3 kinase complex II ;	0.00468485	63.26	26000	102280000	60042000	3933.85	9.91585	2281
SRO9_YEAST	RNA-binding protein SRO9 (Suppressor of RHO3 protein 9)	280	7.8	0.043	430	55.4603	Cargo A	Cytoplasm		Cytoplasm	48.06		A1	P25567	May overlap in function with tropomyosin and may be involved in organization of actin filaments. Acts as a multicopy suppressor of RHO3 mutation. RNA-binding protein which may modulate mRNA translation. Involved in heme regulation of HAP1, as a component of the high-molecular-weight complex (HMC). {ECO:0000269|PubMed:10564276, ECO:0000269|PubMed:11689685}.	SRO9	SRO9		ENSGT00530000067375;		0.00554603	48.059	290120	95604000	71079000	329.533	7.82941	665
THG1_YEAST	tRNA(His) guanylyltransferase (EC 2.7.7.79) (tRNA-histidine guanylyltransferase)	2900	19	0.041	410	21.7295	Cargo A				27.757		A1	P53215	Adds a GMP to the 5'-end of tRNA(His) after transcription and RNase P cleavage. {ECO:0000269|PubMed:14633974}.	THG1	THG1	K10761;	ENSGT00390000011705;		0.00217295	27.757	26000	89860000	27849000	3456.15	18.7824	2010
JSN1_YEAST	Protein JSN1 (Pumilio homology domain family member 1)	180	13	0.041	410	30.8461	Cargo A				120.374		A1	P47135		JSN1	JSN1	K17974;	ENSGT00730000112282;		0.00308461	120.37	425050	90409000	39533000	212.702	13.3121	1832
HSP79_YEAST	Heat shock protein homolog SSE2	110	3.8	0.041	410	109.541	Cargo A				77.621		A1	P32590	Has a calcium-dependent calmodulin-binding activity.	SSE2	SSE2	K09485;	ENSGT00390000016919;	283_Complex 283;	0.0109541	77.62	713690	91107000	140390000	127.656	3.77755	869
MAK11_YEAST	Protein MAK11 (Maintenance of killer protein 11)	2900	68	0.04	400	5.86203	Cargo A	Both		Both	53.672		A1	P20484	Essential for cell growth. Plays a role in assembly of 60S pre-ribosomal particles in the nucleolus. Also required for replication of the M1 double-stranded RNA of the L-A virus. This latter function may reflect an enhanced requirement for free 60S ribosomal particles for the translation of viral mRNAs which lack poly-A tails. {ECO:0000269|PubMed:12808088, ECO:0000269|PubMed:2826479, ECO:0000269|…	MAK11	MAK11	K14830;	ENSGT00390000001263;		0.000586203	53.672	26000	88141000	7512900	3390.04	68.2912	504
VHS3_YEAST	Phosphopantothenoylcysteine decarboxylase subunit VHS3 (Viable in a HAL3 SIT4 background protein 3)	2900	11	0.04	400	35.7766	Cargo A				73.649		A1	Q08438	Component of the phosphopantothenoylcysteine decarboxylase (PPCDC) involved in the coenzyme A synthesis. Acts as an inhibitory subunit of protein phosphatase PPZ1, which is involved in many cellular processes such as G1-S transition or salt tolerance. {ECO:0000269|PubMed:12518319, ECO:0000269|PubMed:15192104, ECO:0000269|PubMed:19915539}.	VHS3	VHS3		ENSGT00440000038107;		0.00357766	73.648	26000	87338000	45852000	3359.15	11.0876	2700
YBP1_YEAST	YAP1-binding protein 1 (Activator of YAP1)	2800	200	0.039	390	1.94582	Cargo A	Cytoplasm		Cytoplasm	77.741		A1	P38315	Involved in oxidative stress response and redox homeostasis. Required for hydrogen peroxide-induced oxidation and nuclear localization (activation) of YAP1. Functions probably in concert with HYP1/GPX3, the actual YAP1 modifying enzyme. YBP1 is not required for HYP1/GPX3-independent, diamide-induced oxidation of YAP1. {ECO:0000269|PubMed:11283351, ECO:0000269|PubMed:12743123}.	YBP1	YBP1		ENSGT00530000068379;		0.000194582	77.74	26000	87057000	2493800	3348.35	203.206	1238
IRC6_YEAST	Increased recombination centers protein 6	2800	72	0.039	390	5.42618	Cargo A				27.879		A1	P43615	Involved in gross chromosomal rearrangements (GCRs) and telomere healing. {ECO:0000269|PubMed:20194442}.	IRC6	IRC6				0.000542618	27.878	26000	86387000	6954300	3322.58	72.3085	1742
CSK21_YEAST	Casein kinase II subunit alpha (CK II subunit alpha) (EC 2.7.11.1)	380	12	0.039	390	32.384	Cargo A				44.668		A1	P15790	Casein kinases are operationally defined by their preferential utilization of acidic proteins such as caseins as substrates. The alpha and alpha' chains contain the catalytic site. May play a role in cell proliferation. Required for cell viability.	CKA1	CKA1	K03097;	ENSGT00740000116084;	4_Casein kinase II complex;	0.0032384	44.667	194350	86815000	41504000	446.694	12.1759	409
BEM1_YEAST	Bud emergence protein 1 (Suppressor of RHO3 protein 1)	180	4900	0.037	370	0.0585197	Cargo A	Cytoplasm		Cytoplasm	61.605		A1	P29366	Necessary for cell polarization during vegetative growth. May link the cytoskeleton to morphogenic determinants on the cell surface. {ECO:0000269|PubMed:17460121}.	BEM1	BEM1	K11237;			5.85197e-06	61.605	388000	82850000	75000	213.531	6430.22	741
SGN1_YEAST	RNA-binding protein SGN1	2700	50	0.037	370	7.53031	Cargo A	Cytoplasm		Cytoplasm	28.954		A1	P40561	mRNA-binding protein that may play a role in modulating the expression of cytoplasmic mRNA.	SGN1	SGN1	K14396;	ENSGT00390000001517;	103_Complex 103;	0.000753031	28.954	26000	82836000	9651000	3186	49.9622	1633
CSK22_YEAST	Casein kinase II subunit alpha' (CK II) (EC 2.7.11.1)	950	8.2	0.037	370	44.7082	Cargo A				39.404		A1	P19454	Casein kinases are operationally defined by their preferential utilization of acidic proteins such as caseins as substrates. The alpha and alpha' chains contain the catalytic site. May play a role in cell proliferation. Required for cell viability.	CKA2	CKA2	K03097;	ENSGT00390000004215;	4_Casein kinase II complex;	0.00447082	39.403	72408	80931000	57299000	1117.71	8.22171	473
APD1_YEAST	Actin patches distal protein 1	2600	7.5	0.036	360	48.0064	Cargo A	Both		Both	35.759		A1	P38281	Required for normal localization of actin patches. Involved in tolerance to sodium ions and hydrogen peroxide. {ECO:0000269|PubMed:10628851}.	APD1	APD1				0.00480064	35.758	26000	79444000	61526000	3055.54	7.51618	1231
RS3A1_YEAST	40S ribosomal protein S1-A (RP10A)	2600	5	0.036	360	71.8551	Cargo A	Cytoplasm		Cytoplasm	28.743		A1	P33442		RPS1A	RPS1A	K02984;	ENSGT00390000018433;		0.00718551	28.743	26000	78701000	92091000	3026.96	4.97459	970
RIO1_YEAST	Serine/threonine-protein kinase RIO1 (EC 2.7.11.1) (Ribosomal RNA-processing protein 10)	2500	37	0.035	350	9.5231	Cargo A	Cytoplasm		Cytoplasm	56.122		A1	Q12196	Required for the final endonucleolytic cleavage at site D converting 20S pre-rRNA into the mature 18S rRNA. Has a role in the cell cycle where it is required for entrance into S-phase and in the control of the onset of anaphase. Appears to also be involved in the maintenance of chromosome stability and correct mitotic segregation. {ECO:0000269|PubMed:11483523, ECO:0000269|PubMed:11972772, ECO:000…	RIO1	RIO1	K07178;	ENSGT00390000004370;		0.00095231	56.122	26000	77612000	12205000	2985.08	37.0157	2827
PNO1_YEAST	Pre-rRNA-processing protein PNO1 (Partner of NOB1) (Ribosomal RNA-processing protein 20)	2500	7.9	0.035	350	44.2206	Cargo A	Both		Both	30.332		A1	Q99216	Required for small ribosomal subunit (SSU) synthesis. Has a role in the processing of early nucleolar and late cytoplasmic pre-RNA species. Recruits DIM1 to nucleolar pre-RNAs. Indirectly required for cleavage at the A2 site of the 20S pre-rRNA, forming 18S rRNA, and at A1 and A2 sites of other pre-rRNAs. {ECO:0000269|PubMed:12502737, ECO:0000269|PubMed:12736301, ECO:0000269|PubMed:15037774}.	PNO1	PNO1	K11884;	ENSGT00390000018052;	239_Small subunit processome;	0.00442206	30.331	26000	77176000	56674000	2968.31	7.92671	2982
ELP2_YEAST	Elongator complex protein 2 (Gamma-toxin target 2)	1400	3.8	0.035	350	91.595	Cargo A	Both		Both	89.411		A1	P42935	Acts as component of the RNA polymerase II elongator complex, which is a major histone acetyltransferase component of the RNA polymerase II (RNAPII) holoenzyme and is involved in transcriptional elongation. Association with elongating RNAPII requires a hyperphosphorylated state of the RNAPII C-terminal domain (CTD). Elongator binds to both naked and nucleosomal DNA, can acetylate both core and nu…	ELP2	ELP2	K11374;	ENSGT00390000000916;	421_HAP subcomplex of elongator complex;	0.0091595	89.409	45918	76517000	117390000	1666.38	3.79421	1698
HRR25_YEAST	Casein kinase I homolog HRR25 (EC 2.7.11.1)	1500	46	0.034	340	7.44893	Cargo A	Both		Both	57.34		A1	P29295	Associated with repair of damaged DNA and meiosis. Phosphorylates serine and threonine. Can use casein as a substrate.	HRR25	HRR25	K14758;	ENSGT00760000119040;	58_Complex 58;	0.000744893	57.339	43991	75459000	9546700	1715.33	46.01	739
OTU2_YEAST	OTU domain-containing protein 2	2400	57	0.033	330	5.84167	Cargo A				36.113		A1	P38747		OTU2	OTU2	K18342;	ENSGT00390000012840;		0.000584167	36.113	26000	73468000	7486800	2825.69	57.1211	1310
STE11_YEAST	Serine/threonine-protein kinase STE11 (EC 2.7.11.25)	190	57	0.033	330	5.82021	Cargo A				80.721		A1	P23561	Serine/threonine protein kinase required for cell-type-specific transcription and signal transduction in yeast. It is thought that it phosphorylates the STE7 protein kinase which itself, phosphorylates the FUS3 and or KSS1 kinases. {ECO:0000269|PubMed:15200959}.	STE11	STE11	K11228;	ENSGT00760000119077;	276_Ste50/Ste11 complex;	0.000582021	80.72	322290	73282000	7459300	227.379	57.1865	586
CEX1_YEAST	Cytoplasmic export protein 1	2400	6.6	0.033	330	50.4096	Cargo A	Cytoplasm		Cytoplasm	84.769		A1	Q12453	Component of the nuclear tRNA export machinery that my collect tRNA from the nuclear tRNA export receptors of the aminoacylation-dependent export and may deliver aminoacylated tRNAs to the translation machinery pathway at the nuclear pore complex. {ECO:0000269|PubMed:17203074}.	CEX1	CEX1	K08876;	ENSGT00760000119345;		0.00504096	84.768	26000	72806000	64606000	2800.23	6.55977	2916
PRTB_YEAST	Cerevisin (EC 3.4.21.48) (Proteinase YSCB) (Vacuolar protease B) (PrB)	1700	52	0.032	320	6.099	Cargo A	Cytoplasm		Cytoplasm	69.621	ER	A1	P09232	Vacuolar proteinase B involved in protein degradation in the vacuole. Among other substrates, acts on carboxypeptidase Y (cpY/PRC1) to activate it by processing its Pro-peptide. Required for meiosis and spore formation, and for optimal survival in stationary phase. {ECO:0000269|PubMed:6764902, ECO:0000269|PubMed:7021321}.	PRB1	PRB1	K01336;	ENSGT00490000043472;		0.0006099	69.621	34698	70164000	7816600	2022.13	52.2506	254
SLA2_YEAST	Protein SLA2 (Transmembrane protein MOP2)	170	5.5	0.032	320	57.4328	Cargo A	Cytoplasm	BioGrid	Cytoplasm	108.911	TM	A1	P33338	Required for cellular morphogenesis and polarization of the cortical cytoskeleton. It might act in concert with proteins such as CDC42 and CDC43 to limit the region of cortical patch formation to the cortex of the bud. Required for the accumulation and/or maintenance of plasma membrane H(+)-ATPase on the cell surface.	SLA2	SLA2		ENSGT00550000074542;	222_Complex 222;	0.00574328	108.91	358860	70170000	73607000	195.536	5.54916	961
RBS1_YEAST	RNA-binding suppressor of PAS kinase protein 1	2200	4900	0.03	300	0.0585197	Cargo A	Cytoplasm	BioGrid	Cytoplasm	51.957		A1	Q05672		RBS1	RBS1				5.85197e-06	51.956	26000	66388000	75000	2553.38	5152.56	2498
PAT1_YEAST	DNA topoisomerase 2-associated protein PAT1 (Decapping activator and translational repressor PAT1) (Topoisomerase II-associated protein PAT1) (mRNA turnover protein 1)	1100	4.7	0.03	300	64.509	Cargo A	Both	BioGrid	Both	88.511		A1	P25644	Activator of decapping that functions as a general and active mechanism of translational repression and required for P-body formation. First decay factor recruited to mRNA, at a time when the mRNA is still associated with translation factors. Subsequently, PAT1 recruits the hepta-heterodimer LSM1-LSM7 complex to P-bodies. In association with the LSM1-LSM7 complex, stabilizes the 3' terminus of mR…	PAT1	PAT1	K12617;		3_Lsm2-Lsm8 complex ;281_"Cytoplasmic mRNA processing body""";	0.0064509	88.51	51822	67119000	82676000	1295.18	4.72564	680
TSR1_YEAST	Ribosome biogenesis protein TSR1 (20S rRNA accumulation protein 1)	2100	16	0.029	290	18.0264	Cargo A	Both		Both	90.748		A1	Q07381	Required for 40S ribosomal subunit synthesis. Required for normal export of the pre-40S particles from the nucleus to the cytoplasm. Its subcellular location and association with pre-40S subunitshifts from mixed cytoplasm/nucleus to all nuclear in RPS19 disruptions, suggesting it acts after the ribosomal protein. {ECO:0000269|PubMed:11565749, ECO:0000269|PubMed:12628929, ECO:0000269|PubMed:151678…	TSR1	TSR1	K14799;	ENSGT00550000074945;	58_Complex 58;	0.00180264	90.746	26000	63403000	23103000	2438.58	15.9748	2630
UTP9_YEAST	U3 small nucleolar RNA-associated protein 9 (U3 snoRNA-associated protein 9) (U three protein 9) (U3 protein 9 required for transcription) (t-UTP9)	320	5.7	0.029	290	49.9485	Cargo A	Nucleus		Nucleus	65.271		A1	P38882	Involved in nucleolar processing of pre-18S ribosomal RNA. Required for optimal pre-ribosomal RNA transcription by RNA polymerase I together with a subset of U3 proteins required for transcription (t-UTPs). {ECO:0000269|PubMed:12068309, ECO:0000269|PubMed:15489292}.	UTP9	UTP9	K14551;		70_Small subunit processome;239_Small subunit processome;	0.00499485	65.271	165170	63042000	64015000	381.679	5.73248	1382
SRP72_YEAST	Signal recognition particle subunit SRP72 (Signal recognition particle 72 kDa protein homolog)	350	61	0.028	280	4.56664	Cargo A	Both		Both	73.541		A1	P38688	Signal-recognition-particle (SRP) assembly has a crucial role in targeting secretory proteins to the rough endoplasmic reticulum (ER) membrane. SRP is required for the cotranslational protein translocation for ER import and preferentially recognizes strongly hydrophobic signal sequences. It is involved in targeting the nascent chain-ribosome (RNC) complex to the ER and is proposed to participate …	SRP72	SRP72	K03108;		52_Signal recognition complex ;	0.000456664	73.54	150290	61117000	5852700	406.66	60.7855	1282
SMY1_YEAST	Kinesin-related protein SMY1 (Suppressor protein SMY1)	2000	32	0.028	280	8.60005	Cargo A	Cytoplasm		Cytoplasm	73.799		A1	P32364	Possible microtubule-based motor that can interact or substitute with myosin 2 (MYO2).	SMY1	SMY1		ENSGT00650000093360;		0.000860005	73.798	26000	61315000	11022000	2358.27	32.3818	802
SA185_YEAST	SIT4-associating protein SAP185	2000	24	0.028	280	11.7905	Cargo A				121.403		A1	P40856	Associates with the SIT4 phosphatase in a cell cycle dependent manner. May be directly or indirectly involved in SIT4-dependent functions in budding and in normal G1 cyclin expression.	SAP185	SAP185	K15458;	ENSGT00390000009899;	83_Sit4/Sap185 protein phosphatase complex;	0.00117905	121.4	26000	61322000	15111000	2358.54	23.6221	1645
RLM1_YEAST	Transcription factor RLM1	2000	220	0.027	270	1.24756	Cargo A	Nucleus		Nucleus	73.484		A1	Q12224	May function as a transcription factor downstream of MPK1 that is subject to activation by the MPK1 mitogen-activated protein kinase pathway. Binds to the DNA sequence 5'-CTA[TA](4)TAG-3'. At least some RML1 target genes are involved in cell wall biosynthesis. {ECO:0000269|PubMed:9111331}.	RLM1	RLM1	K09265;	ENSGT00390000011828;		0.000124756	73.483	26000	60243000	1598900	2317.04	219.321	2835
SKG3_YEAST	Protein SKG3 (Suppressor of lethality of KEX2-GAS1 double null mutant protein 3)	1900	35	0.027	270	7.50729	Cargo A	Cytoplasm		Cytoplasm	114.111		A1	Q06315	May play a role in cell wall integrity. {ECO:0000269|PubMed:15645486}.	SKG3	SKG3	K12609;	ENSGT00530000068670;		0.000750729	114.11	26000	58645000	9621500	2255.58	35.4799	2552
UBC8_YEAST	Ubiquitin-conjugating enzyme E2-24 kDa (EC 6.3.2.19) (Glucose-induced degradation protein 3) (Ubiquitin carrier protein) (Ubiquitin-protein ligase)	1800	33	0.025	250	7.61489	Cargo A	Cytoplasm		Cytoplasm	24.633		A1	P28263	Catalyzes the covalent attachment of ubiquitin to other proteins. Capable, in vitro, to ubiquitinate histone H2A. Has a role in the negative regulation of gluconeogenesis. Required for proteasome-dependent catabolite degradation of fructose-1,6-bisphosphatase (FBPase). {ECO:0000255|PROSITE-ProRule:PRU00388, ECO:0000269|PubMed:10811607, ECO:0000269|PubMed:12686616}.	UBC8	UBC8	K10576;	ENSGT00390000004852;		0.000761489	24.633	26000	55042000	9759400	2117	32.8296	724
VPS29_YEAST	Vacuolar protein sorting-associated protein 29 (Carboxypeptidase Y-deficient protein 11) (Vesicle protein sorting 29)	690	4	0.025	250	62.7877	Cargo A				31.013		A1	P38759	Plays a role in vesicular protein sorting. Required for the endosome-to-Golgi retrieval of the vacuolar protein sorting receptor VPS10. Component of the membrane-associated retromer complex which is essential in endosome-to-Golgi retrograde transport. The VPS29-VPS26-VPS35 subcomplex may be involved in cargo selection.	VPS29	VPS29	K18467;	ENSGT00390000012669;	380_Retromer subcomplex ;	0.00627877	31.012	68160	55505000	80470000	814.334	4.01507	1318
PEP8_YEAST	Carboxypeptidase Y-deficient protein 8 (Vacuolar protein sorting-associated protein 26) (Vacuolar protein-targeting protein 4)	1700	4100	0.024	240	0.0585197	Cargo A				42.547		A1	P40335	Plays a role in vesicular protein sorting. Required for the endosome-to-Golgi retrieval of the vacuolar protein sorting receptor VPS10. Component of the membrane-associated retromer complex which is essential in endosome-to-Golgi retrograde transport. The VPS29-VPS26-VPS35 subcomplex may be involved in cargo selection.	PEP8	PEP8	K18466;	ENSGT00390000002588;		5.85197e-06	42.546	26000	52983000	75000	2037.81	4112.16	1564
APM2_YEAST	Adaptin medium chain homolog APM2 (Adaptin-mu1-II)	1700	130	0.024	240	1.88886	Cargo A	Cytoplasm		Cytoplasm	69.99		A1	P38700		APM2	APM2			315_AP-1 adaptor complex ;	0.000188886	69.989	26000	53431000	2420800	2055.04	128.478	1290
YAT2_YEAST	Carnitine O-acetyltransferase YAT2 (EC 2.3.1.7)	1700	23	0.024	240	10.72	Cargo A	Cytoplasm		Cytoplasm	103.334		A1	P40017	Involved in the shutteling of acetyl-CoA in the cell. {ECO:0000269|PubMed:11329169}.	YAT2	YAT2				0.001072	103.33	26000	53552000	13739000	2059.69	22.689	1505
PPZ1_YEAST	Serine/threonine-protein phosphatase PP-Z1 (EC 3.1.3.16)	1700	8.5	0.024	240	28.6403	Cargo A				77.491		A1	P26570	Essential for the maintenance of cell size and integrity in response to osmotic stress.	PPZ1	PPZ1	K06269;	ENSGT00710000107291;	78_Ppz1 protein phosphate complex;	0.00286403	77.49	26000	53471000	36706000	2056.58	8.47961	693
KTI12_YEAST	Protein KTI12 (Gamma-toxin target protein 4) (Killer toxin insensitivity protein 12)	160	7.4	0.024	240	32.2092	Cargo A	Both		Both	35.322		A1	P34253	Elongator-associated factor that is not a structural subunit but rather transiently contacts Elongator, presumably to promote its interaction with elongation competent pol II. Regulates Elongator complex gamma-toxin target (TOT) activity, resulting in G1 block by Kluyveromyces lactis toxin zymocin (pGKL1 killer toxin), probably through regulation of the Elongator IKI3 subunit phosphorylation stat…	KTI12	KTI12	K15456;	ENSGT00390000002443;		0.00322092	35.322	281110	52146000	41280000	185.5	7.35319	1003
GFD1_YEAST	mRNA transport factor GFD1 (Good for full DBP5 activity protein 1)	1700	4000	0.023	230	0.0585197	Cargo A	Both		Both	21.571		A1	Q04839	High-copy suppressor of mutant alleles of ATP-dependent RNA helicase DBP5, which is involved in mRNA export from the nucleus. It may also play an important role in a late stage of NAB2-mRNA export. {ECO:0000269|PubMed:10523319, ECO:0000269|PubMed:10610322, ECO:0000269|PubMed:15208322}.	GFD1	GFD1				5.85197e-06	21.571	26000	51036000	75000	1962.92	3961.05	2464
KRR1_YEAST	KRR1 small subunit processome component (KRR-R motif-containing protein 1) (Ribosomal RNA assembly protein KRR1)	1600	3900	0.023	230	0.0585197	Cargo A	Nucleus		Nucleus	37.159		A1	P25586	Required for 40S ribosome biogenesis. Involved in nucleolar processing of pre-18S ribosomal RNA and ribosome assembly. Essential for vegetative growth. {ECO:0000269|PubMed:11027267, ECO:0000269|PubMed:11996121, ECO:0000269|PubMed:15094838, ECO:0000269|PubMed:15590835}.	KRR1	KRR1	K06961;	ENSGT00390000018775;	23_Complex 23;157_Complex 157;354_Complex 354;	5.85197e-06	37.159	26000	50065000	75000	1925.58	3885.68	669
HAS1_YEAST	ATP-dependent RNA helicase HAS1 (EC 3.6.4.13) (Helicase associated with SET1 protein 1)	1700	54	0.023	230	4.34934	Cargo A	Nucleus		Nucleus	56.717		A1	Q03532	ATP-dependent RNA helicase involved in 40S ribosomal subunit biogenesis. Required for the processing and cleavage of 35S pre-rRNA at sites A0, A1, and A2, leading to mature 18S rRNA. {ECO:0000269|PubMed:15049817, ECO:0000269|PubMed:15242642, ECO:0000269|PubMed:15718299}.	HAS1	HAS1	K13179;	ENSGT00680000100037;		0.000434934	56.717	26000	51850000	5574200	1994.23	54.1453	2334
PMA1_YEAST	Plasma membrane ATPase 1 (EC 3.6.3.6) (Proton pump 1)	1700	16	0.023	230	14.9998	Cargo A	Cytoplasm		Cytoplasm	99.619	TM	A1	P05030	The plasma membrane ATPase of plants and fungi is a hydrogen ion pump. The proton gradient it generates drives the active transport of nutrients by H(+)-symport. The resulting external acidification and/or internal alkinization may mediate growth responses.	PMA1;PMA2	PMA1;PMA2	K01535;	ENSGT00760000119767;		0.00149998	99.618	26000	51673000	19224000	1987.42	15.6464	139
LSG1_YEAST	Large subunit GTPase 1 (EC 3.6.1.-)	1700	14	0.023	230	16.8576	Cargo A	Cytoplasm		Cytoplasm	72.728		A1	P53145	GTPase required for the nuclear export of the 60S ribosomal subunit. Acts by mediating the release of NMD3 from the 60S ribosomal subunit after export into the cytoplasm. {ECO:0000269|PubMed:15660131, ECO:0000269|PubMed:15831484, ECO:0000269|PubMed:17015443, ECO:0000269|PubMed:17761675}.	LSG1	LSG1	K14539;	ENSGT00530000063453;	50_Complex 50;	0.00168576	72.727	26000	51793000	21605000	1992.04	13.9544	1986
NAT1_YEAST	N-terminal acetyltransferase A complex subunit NAT1 (NatA complex subunit NAT1) (Amino-terminal, alpha-amino, acetyltransferase 1)	1700	5.5	0.023	230	42.2215	Cargo A	Cytoplasm		Cytoplasm	98.905		A1	P12945	Non-catalytic component of the NatA N-terminal acetyltransferase, which catalyzes acetylation of proteins beginning with Met-Ser, Met-Gly and Met-Ala. N-acetylation plays a role in normal eukaryotic translation and processing, protect against proteolytic degradation and protein turnover. NAT1 anchors ARD1 and NAT5 to the ribosome and may present the N termini of nascent polypeptides for acetylati…	NAT1	NAT1	K00670;	ENSGT00390000007676;	193_Complex 193;272_Complex 272;	0.00422215	98.904	26000	50853000	54112000	1955.88	5.47038	353
SUB1_YEAST	RNA polymerase II transcriptional coactivator SUB1	1600	21	0.021	210	10.3861	Cargo A	Nucleus		Nucleus	33.102		A1	P54000	Plays a role in the release of TFIIB from the transcription complex during transcription initiation. Binds to TFIIB and specifically inhibits the formation of the TBP-TFIIB-promoter complexes.	SUB1	SUB1		ENSGT00390000008802;		0.00103861	33.102	26000	47508000	13311000	1827.23	20.7755	2163
RPF1_YEAST	Ribosome production factor 1 (Ribosome biogenesis protein RPF1)	1400	3400	0.02	200	0.0585197	Cargo A	Nucleus		Nucleus	35.121		A1	P38805	Essential protein. Required for biogenesis of the 60S ribosomal subunit. {ECO:0000269|PubMed:11864606, ECO:0000269|PubMed:12702244}.	RPF1	RPF1	K14846;	ENSGT00550000074691;	7_Complex 7;	5.85197e-06	35.121	26000	43296000	75000	1665.23	3360.32	1343
CACM_YEAST	Putative mitochondrial carnitine O-acetyltransferase (EC 2.3.1.7)	380	840	0.02	200	0.232331	Cargo A	Cytoplasm		Cytoplasm	77.766		A1	P80235	Involved in the transfer of acetyl-CoA into mitochondria. May also be involved in the metabolism of acetate and of ethanol.	YAT1	YAT1	K00624;	ENSGT00550000074786;		2.32331e-05	77.765	96204	43218000	297760	449.233	844.876	2191
ATG1_YEAST	Serine/threonine-protein kinase ATG1 (EC 2.7.11.1) (Autophagy protein 3) (Autophagy-related protein 1) (Cytoplasm to vacuole targeting protein 10)	1500	180	0.02	200	1.14691	Cargo A	Cytoplasm		Cytoplasm	101.717		A1	P53104	Serine/threonine protein kinase involved in the cytoplasm to vacuole transport (Cvt) and found to be essential in autophagy, where it is required for the formation of autophagosomes. Involved in the clearance of protein aggregates which cannot be efficiently cleared by the proteasome. Required for selective autophagic degradation of the nucleus (nucleophagy) as well as for mitophagy which contrib…	ATG1	ATG1	K08269;	ENSGT00770000120504;		0.000114691	101.72	26000	44999000	1469900	1730.73	178.201	1967
NOP16_YEAST	Nucleolar protein 16	1400	44	0.02	200	4.53137	Cargo A	Nucleus		Nucleus	26.901		A1	P40007	Involved in the biogenesis of the 60S ribosomal subunit. {ECO:0000269|PubMed:11583614}.	NOP16	NOP16	K14839;			0.000453137	26.901	26000	44170000	5807500	1698.85	44.2724	1498
SEC65_YEAST	Signal recognition particle subunit SEC65	100	26	0.02	200	7.71039	Cargo A	Cytoplasm		Cytoplasm	31.17		A1	P29478	Signal-recognition-particle (SRP) assembly has a crucial role in targeting secretory proteins to the rough endoplasmic reticulum (ER) membrane. SRP is required for the cotranslational protein translocation for ER import and preferentially recognizes strongly hydrophobic signal sequences. It is involved in targeting the nascent chain-ribosome (RNC) complex to the ER and is proposed to participate …	SEC65	SEC65	K03105;		52_Signal recognition complex ;	0.000771039	31.169	376810	44766000	9881800	118.803	26.3698	746
WHI4_YEAST	Protein WHI4	1400	24	0.02	200	8.28092	Cargo A	Cytoplasm		Cytoplasm	70.69		A1	Q07655	Has a partially redundant function to WHI3, a dosage-dependent modulator of cell size. {ECO:0000269|PubMed:11290704}.	WHI4	WHI4		ENSGT00530000067542;		0.000828092	70.689	26000	43710000	10613000	1681.15	23.9738	2649
BRE5_YEAST	UBP3-associated protein BRE5 (Brefeldin-A sensitivity protein 5)	1500	13	0.02	200	15.9291	Cargo A				57.674		A1	P53741	Has a role in de-ubiquitination. In conjunction with UBP3, cleaves ubiquitin, leading to the subsequent mono-ubiquitination of sec23. {ECO:0000269|PubMed:12778054}.	BRE5	BRE5			152_Bre5/Ubp3 complex;	0.00159291	57.673	26000	45317000	20415000	1742.96	12.9213	2084
ELF1_YEAST	Transcription elongation factor 1	1400	6.9	0.02	200	29.2154	Cargo A	Nucleus		Nucleus	16.157		A1	P36053	Transcription elongation factor implicated in the maintenance of proper chromatin structure in actively transcribed regions. {ECO:0000269|PubMed:16260625}.	ELF1	ELF1		ENSGT00390000000053;		0.00292154	16.157	26000	44378000	37443000	1706.85	6.89909	1065
SIS2_YEAST	Phosphopantothenoylcysteine decarboxylase subunit SIS2 (Halotolerance protein HAL3) (Sit4 suppressor 2)	1400	6.2	0.02	200	31.9307	Cargo A	Both		Both	62.478		A1	P36024	Component of the phosphopantothenoylcysteine decarboxylase (PPCDC) involved in the coenzyme A synthesis. Acts as an inhibitory subunit of protein phosphatase PPZ1, which is involved in many cellular processes such as G1-S transition or salt tolerance. Also modulates the expression of the ENA1 ATPase. {ECO:0000269|PubMed:19915539}.	SIS2	SIS2		ENSGT00440000038107;		0.00319307	62.477	26000	43425000	40923000	1670.19	6.17685	1056
CSK2B_YEAST	Casein kinase II subunit beta (CK II beta)	1500	3.3	0.02	200	61.3138	Cargo A				32.265		A1	P43639	Plays a complex role in regulating the basal catalytic activity of the alpha subunit. {ECO:0000250}.	CKB1	CKB1	K03115;		4_Casein kinase II complex;	0.00613138	32.264	26000	44420000	78581000	1708.46	3.29045	1747
AATM_YEAST	Aspartate aminotransferase, mitochondrial (EC 2.6.1.1) (Transaminase A)	140	3200	0.019	190	0.0585197	Cargo A	Cytoplasm		Cytoplasm	51.795	MT	A1	Q01802	Plays a key role in amino acid metabolism. Important for metabolite exchange between mitochondria and cytosol (By similarity). {ECO:0000250}.	AAT1	AAT1	K14455;			5.85197e-06	51.795	249150	40975000	75000	164.459	3180.18	2230
CDC24_YEAST	Cell division control protein 24 (Calcium regulatory protein)	1400	83	0.019	190	2.33595	Cargo A				96.94		A1	P11433	Promotes the exchange of CDC42-bound GDP by GTP. Controls the polarity of calmodulin, and the calcium regulatory process of bud emergence. CDC24 may be involved in the initial selection and organization of the budding site. {ECO:0000269|PubMed:17460121}.	CDC24	CDC24	K11236;	ENSGT00740000115307;	226_Boi2/Bem1/Cdc24 complex;	0.000233595	96.938	26000	42634000	2993800	1639.77	82.8949	328
RLP7_YEAST	Ribosome biogenesis protein RLP7 (Ribosomal protein L7-like)	1400	25	0.019	190	7.49684	Cargo A	Nucleus		Nucleus	36.559		A1	P40693	Involved in the biogenesis of the 60S ribosomal subunit. May act as a specificity factor that binds precursor rRNAs and tethers the enzymes that carry out the early 5' to 3' exonucleolytic reactions that generate the mature rRNAs. {ECO:0000269|PubMed:11087857}.	RLP7	RLP7	K02937;		307_Complex 307;394_Complex 394;	0.000749684	36.559	26000	41816000	9608100	1608.31	25.3338	1642
CAB3_YEAST	Coenzyme A biosynthesis protein 3	1400	12	0.019	190	16.7015	Cargo A	Cytoplasm		Cytoplasm	65.238		A1	P36076	Component of the phosphopantothenoylcysteine decarboxylase (PPCDC) involved in the coenzyme A synthesis. {ECO:0000269|PubMed:19266201, ECO:0000269|PubMed:19915539}.	CAB3	CAB3	K01598;	ENSGT00440000038107;		0.00167015	65.237	26000	43027000	21405000	1654.88	11.7009	1072
SKP2_YEAST	F-box protein SKP2	1300	110	0.018	180	1.71478	Cargo A	Cytoplasm		Cytoplasm	88.942		A1	P42843	Substrate recognition component of a SCF (SKP1-CUL1-F-box protein) E3 ubiquitin-protein ligase complex which mediates the ubiquitination and subsequent proteasomal degradation of target proteins. Probably recognizes and binds to phosphorylated target proteins (By similarity). Regulates protein levels of sulfur metabolism enzymes. The SCF(SKP2) complex may regulate some transcription factors or re…	SKP2	SKP2				0.000171478	88.941	26000	40152000	2197700	1544.31	106.349	1695
YTM1_YEAST	Ribosome biogenesis protein YTM1 (Microtubule-associated protein YTM1)	1300	17	0.018	180	10.681	Cargo A	Nucleus		Nucleus	51.359		A1	Q12024	Component of the NOP7 complex, which is required for maturation of the 25S and 5.8S ribosomal RNAs and formation of the 60S ribosome. {ECO:0000255|HAMAP-Rule:MF_03029, ECO:0000269|PubMed:16287855, ECO:0000269|PubMed:18448671, ECO:0000269|PubMed:20542003}.	YTM1	YTM1	K14863;	ENSGT00770000120650;	394_Complex 394;440_Complex 440;	0.0010681	51.358	26000	40861000	13689000	1571.58	17.3753	2764
PAH1_YEAST	Phosphatidic acid phosphohydrolase 1 (PAP1) (EC 3.1.3.4) (Protein SMP2)	1300	12	0.018	180	14.4302	Cargo A	Both		Both	95.031		A1	P32567	Mg(2+)-dependent phosphatidate (PA) phosphatase which catalyzes the dephosphorylation of PA to yield diacylglycerol. Required for de novo lipid synthesis and formation of lipid droplets. Controles transcription of phospholipid biosynthetic genes and nuclear structure by regulating the amount of membrane present at the nuclear envelope. Involved in plasmid maintenance, in respiration and in cell p…	PAH1	PAH1	K15728;	ENSGT00390000011286;		0.00144302	95.03	26000	39257000	18494000	1509.88	12.3561	859
YP247_YEAST	WD repeat-containing protein YPL247C	290	230	0.017	170	0.720572	Cargo A	Both		Both	57.324		A1	Q12523		YPL247C	YPL247C	K11805;	ENSGT00390000006939;		7.20572e-05	57.323	106270	36563000	923500	344.058	230.462	2945
KRE33_YEAST	UPF0202 protein KRE33 (Killer toxin-resistance protein 33)	1200	11	0.017	170	16.1046	Cargo A	Nucleus		Nucleus	119.348		A1	P53914		KRE33	KRE33	K14521;	ENSGT00390000009140;	23_Complex 23;354_Complex 354;	0.00161046	119.35	26000	38235000	20640000	1470.58	10.7832	2135
RPB3_YEAST	DNA-directed RNA polymerase II subunit RPB3 (RNA polymerase II subunit 3) (RNA polymerase II subunit B3) (B44.5) (DNA-directed RNA polymerase II 45 kDa polypeptide)	1200	10	0.017	170	16.0913	Cargo A	Nucleus		Nucleus	35.298		A1	P16370	DNA-dependent RNA polymerase catalyzes the transcription of DNA into RNA using the four ribonucleoside triphosphates as substrates. Component of RNA polymerase II which synthesizes mRNA precursors and many functional non-coding RNAs. Pol II is the central component of the basal RNA polymerase II transcription machinery. It is composed of mobile elements that move relative to each other. RPB3 is p…	RPB3	RPB3	K03011;	ENSGT00640000091532;	73_RNA polymerase II complex ;	0.00160913	35.297	26000	36855000	20623000	1417.5	10.4025	418
FRA1_YEAST	Putative Xaa-Pro aminopeptidase FRA1 (EC 3.4.11.9) (Fe repressor of activation 1)	1200	5	0.017	170	34.1435	Cargo A	Cytoplasm		Cytoplasm	84.924		A1	Q07825	Involved in the regulation of the iron regulon in responss to decreased mitochondrial iron-sulfur cluster synthesis. {ECO:0000269|PubMed:18281282}.	FRA1	FRA1	K01262;	ENSGT00390000013970;		0.00341435	84.923	26000	37953000	43759000	1459.73	5.04863	2657
RL16A_YEAST	60S ribosomal protein L16-A (L13a) (L21) (RP22) (YL15)	1300	4	0.017	170	44.0037	Cargo A	Cytoplasm		Cytoplasm	22.201		A1	P26784		RPL16A	RPL16A	K02872;	ENSGT00390000010799;		0.00440037	22.201	26000	38519000	56396000	1481.5	3.97577	698
YKC3_YEAST	Uncharacterized protein YKL023W	1100	2700	0.016	160	0.0585197	Cargo A	Cytoplasm		Cytoplasm	32.293		A1	P36103		YKL023W	YKL023W				5.85197e-06	32.293	26000	34857000	75000	1340.65	2705.35	1083
GPB2_YEAST	Guanine nucleotide-binding protein subunit beta 2 (Gbeta mimic kelch protein 2)	120	220	0.016	160	0.739704	Cargo A	Cytoplasm		Cytoplasm	98.656		A1	P39717	Beta subunit of a guanine nucleotide-binding protein (G protein). G proteins are involved as modulators or transducers in various transmembrane signaling systems. The beta and gamma chains are required for the GTPase activity, for replacement of GDP by GTP, and for G protein-effector interaction. Involved in the determination of the cAMP level according to nutritional conditions, most probably as…	GPB2	GPB2		ENSGT00530000066309;		7.39704e-05	98.655	252910	35416000	948020	140.034	217.459	1457
PP2C4_YEAST	Protein phosphatase 2C homolog 4 (PP2C-4) (EC 3.1.3.16)	1200	100	0.016	160	1.63044	Cargo A				44.176		A1	P38089		PTC4	PTC4	K01090;	ENSGT00770000120571;	192_Complex 192;	0.000163044	44.175	26000	36470000	2089600	1402.69	101.594	1161
VPS35_YEAST	Vacuolar protein sorting-associated protein 35 (Vacuolar protein-targeting protein 7)	1200	17	0.016	160	9.62922	Cargo A	Cytoplasm		Cytoplasm	109.142		A1	P34110	Plays a role in vesicular protein sorting. Required for the endosome-to-Golgi retrieval of the vacuolar protein sorting receptor VPS10. Vacuolar carboxypeptidase Y (CPY) sorting is completely dependent on the presence of functional VPS35. The latter may play a role in the function, modification or packaging of a CPY-specific receptor complex. Component of the membrane-associated retromer complex …	VPS35	VPS35	K18468;	ENSGT00390000007315;	380_Retromer subcomplex ;	0.000962922	109.14	26000	35395000	12341000	1361.35	16.695	983
NMD2_YEAST	Nonsense-mediated mRNA decay protein 2 (Up-frameshift suppressor 2)	1100	12	0.016	160	13.2309	Cargo A	Cytoplasm		Cytoplasm	126.747		A1	P38798	Involved in nonsense-mediated decay of mRNAs containing premature stop codons. It interacts, via its C-terminus, with NAM7/UPF1. Could be involved in determining the efficiency of translational termination or reinitiation or factors involved in the initial assembly of an initiation- and termination-competent mRNP.	NMD2	NMD2	K14327;	ENSGT00530000064318;		0.00132309	126.75	26000	34734000	16957000	1335.92	11.9234	1339
PAR32_YEAST	Protein PAR32 (Protein phosphorylated after rapamycin 32)	1200	11	0.016	160	14.7243	Cargo A	Cytoplasm		Cytoplasm	31.886		A1	Q12515	Involved in resistance to cisplatin. {ECO:0000269|PubMed:15994967}.	PAR32	PAR32				0.00147243	31.886	26000	35482000	18871000	1364.69	10.9448	2941
[truncated: 2,639 more rows]

## Sheet: Translation factors
INDEX		Saccharomyces cerevisiae
KEGG	Name	UniProt Link	Mass	Protein description	RanGTP Stimulation	Enrichment from input	Molar Fraction in CRM1+RanGTP (×10^6)	Category	Simplified Localization	Reported CRM1 interactions	id	Sorting
B Initiation factors												1
C eIF-1A												2
K03236	EIF1A; translation initiation factor 1A	IF1A_YEAST	17.4	Eukaryotic translation initiation factor 1A (eIF-1A) (Eukaryotic translation initiation factor 4C) (eIF-4C)	180	0.5	390	Ambiguous			1396	3
C eIF-1												4
[truncated: 86 more rows]

## Sheet: Ribosome biogenesis
INDEX		Saccharomyces cerevisiae
[truncated: 62 more rows]

## Sheet: Autophagy
INDEX		Saccharomyces cerevisiae
[truncated: 14 more rows]

## Sheet: Aminoacyl tRNA ligases
INDEX		Saccharomyces cerevisiae
[truncated: 25 more rows]

[truncated: 4 more sheets: Cytoplasmic mRNA biogenesis, Protein kinases, Protein phosphatases, Ubiquitin pathway]
