# Supplementary figures and images for: A deep proteomics perspective on CRM1-mediated nuclear export and nucleocytoplasmic partitioning
Source: eLife journal article supplement (doi:10.7554/elife.11466), 2015-12-17

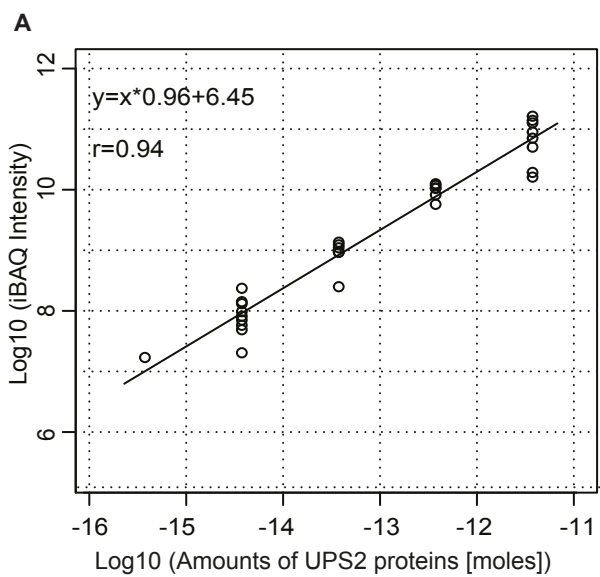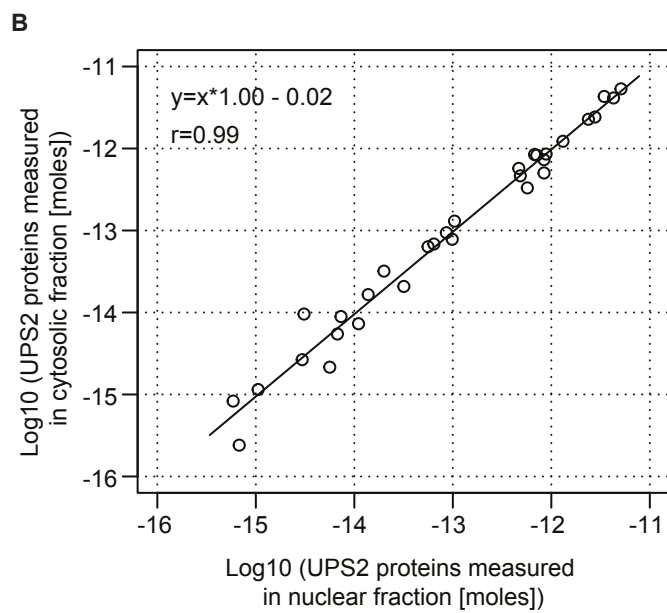

Supplement: supp [file elife-11466-supp-v1.zip]

**A**

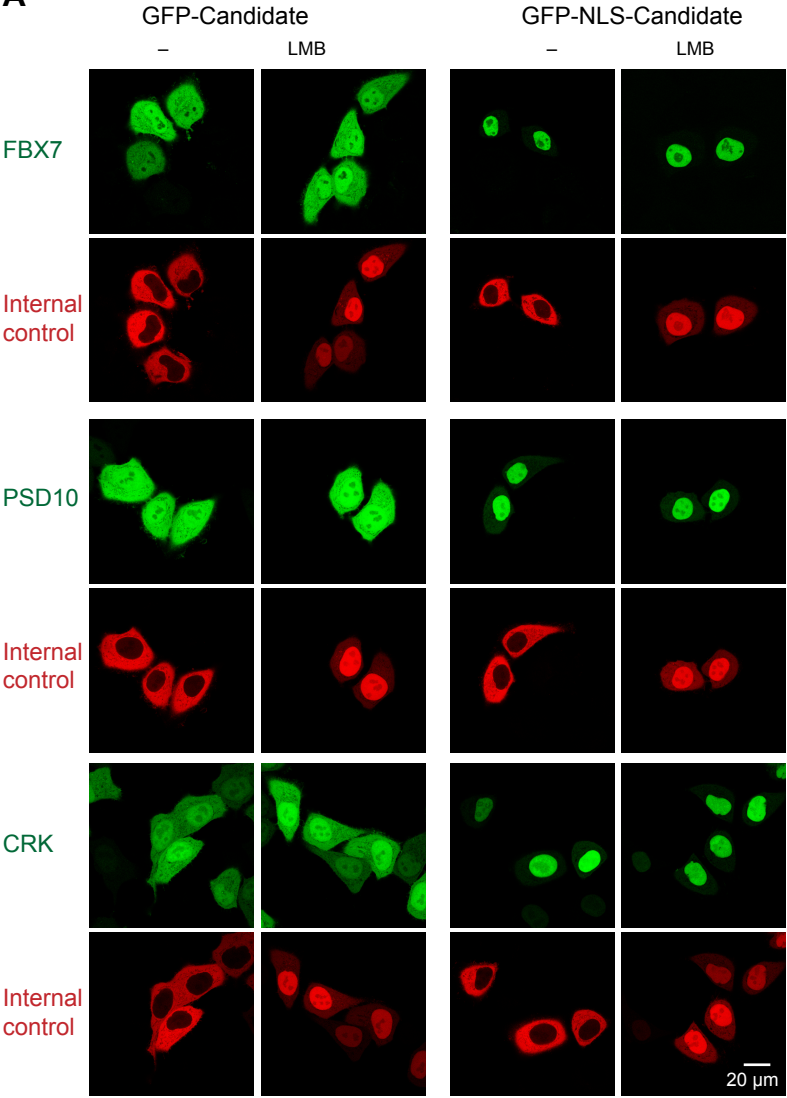

**B**

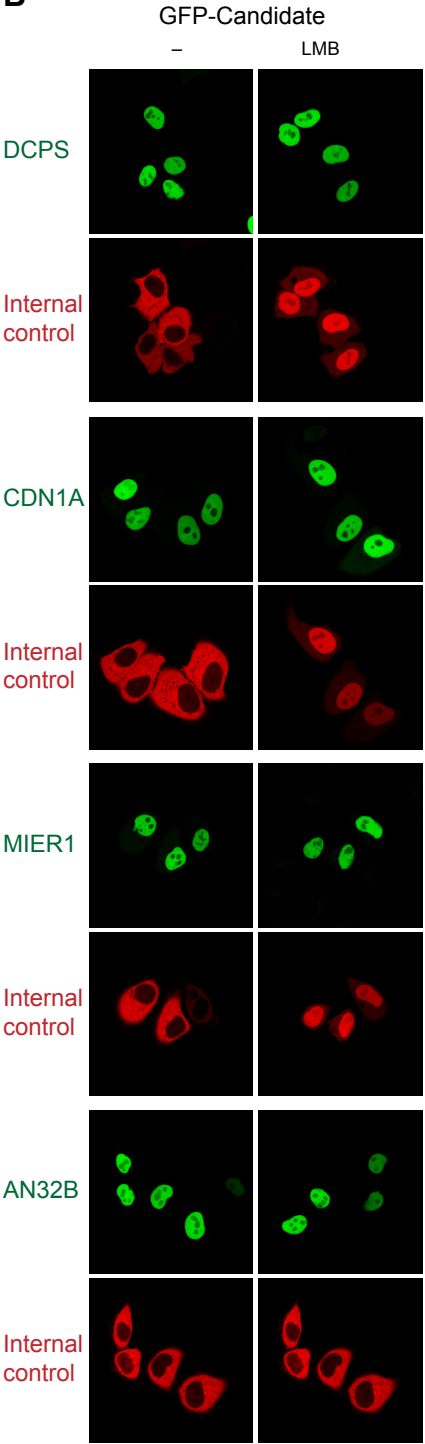

Supplement: supp [file elife-11466-supp-v1.zip]
